# Supplementary material
Source: publisher site journal article supplement (https://neobiota.pensoft.net/article/82776/download/suppl/31/)
Supplement: Supplementary file 1

## AS-ISK v2

| Taxon and Assessor details         |                                                                                                                       |
|------------------------------------|-----------------------------------------------------------------------------------------------------------------------|
| Category                           | Fishes and Lampreys (freshwater)                                                                                      |
| Taxon name                         | <i>Ameiurus melas</i>                                                                                                 |
| Common name                        | black bullhead                                                                                                        |
| Assessor                           | Bella Japoshvili                                                                                                      |
| Risk screening context             |                                                                                                                       |
| Reason and socio-economic benefits | The species have been introduced to a number of countries in Europe where it established                              |
| Risk assessment area               | South Caucasus                                                                                                        |
| Taxonomy                           | Actinopteri (ray-finned fishes) > Siluriformes (Catfishes) > Ictaluridae (North American freshwater)                  |
| Native range                       | North America                                                                                                         |
| Introduced range                   | Europe, South America                                                                                                 |
| URL                                | <a href="https://www.fishbase.de/summary/Ameiurus-melas.html">https://www.fishbase.de/summary/Ameiurus-melas.html</a> |

|                                                |      |                                                                                                                                                                         | Response | Justification (references and/or other information)                                                                                                                                                                                                                         | Confidence |
|------------------------------------------------|------|-------------------------------------------------------------------------------------------------------------------------------------------------------------------------|----------|-----------------------------------------------------------------------------------------------------------------------------------------------------------------------------------------------------------------------------------------------------------------------------|------------|
| A. Biogeography/Historical                     |      |                                                                                                                                                                         |          |                                                                                                                                                                                                                                                                             |            |
| 1. Domestication/Cultivation                   |      |                                                                                                                                                                         |          |                                                                                                                                                                                                                                                                             |            |
| 1                                              | 1.01 | Has the taxon been the subject of domestication (or cultivation) for at least 20 generations?                                                                           | Yes      | Welcomme, R. L. (Ed.). (1988). International introductions of inland aquatic species (Vol. 294). Food & Agriculture Org.                                                                                                                                                    | Very high  |
| 2                                              | 1.02 | Is the taxon harvested in the wild and likely to be sold or used in its live form?                                                                                      | Yes      | for example Krogman, R. M., Fischer, J. R., Quist, M. C., Steuck, M. J., & Marron, M. M. (2011). Historical trends in ictalurid catfish commercial harvest in the upper Mississippi River. In American Fisheries Society Symposium (Vol. 77, pp. 000-000).                  | High       |
| 3                                              | 1.03 | Does the taxon have invasive races, varieties, sub-taxa or congeners?                                                                                                   | Yes      | Congeners such as <i>A. nebulosus</i> ( <a href="https://www.cabi.org/isc/datasheet/94468">https://www.cabi.org/isc/datasheet/94468</a> )                                                                                                                                   | Very high  |
| 2. Climate, distribution and introduction risk |      |                                                                                                                                                                         |          |                                                                                                                                                                                                                                                                             |            |
| 4                                              | 2.01 | How similar are the climatic conditions of the Risk Assessment (RA) area and the taxon's native range?                                                                  | High     | Results of climatch algorithm                                                                                                                                                                                                                                               | Medium     |
| 5                                              | 2.02 | What is the quality of the climate matching data?                                                                                                                       | Low      | Due to low accuracy of local climate data                                                                                                                                                                                                                                   | High       |
| 6                                              | 2.03 | Is the taxon already present outside of captivity in the RA area?                                                                                                       | No       | Not yet recorded in wild in RA area                                                                                                                                                                                                                                         | Very high  |
| 7                                              | 2.04 | How many potential vectors could the taxon use to enter in the RA area?                                                                                                 | >1       | Hitchicker, independent spread and also recreational purpose (e.g. Kutsokan, I., Kvach, Y., Dykyi, I., & Dzyziuk, N. (2018). The first report of the brown bullhead <i>Ameiurus nebulosus</i> (Le Sueur, 1819) in the Dniester River drainage, Ukraine. <i>BioInvasions</i> | High       |
| 8                                              | 2.05 | Is the taxon currently found in close proximity to, and likely to enter into, the RA area in the near future (e.g. unintentional and intentional introductions)?        | No       | No documented evidence                                                                                                                                                                                                                                                      | High       |
| 3. Invasive elsewhere                          |      |                                                                                                                                                                         |          |                                                                                                                                                                                                                                                                             |            |
| 9                                              | 3.01 | Has the taxon become naturalised (established viable populations) outside its native range?                                                                             | Yes      | e.g. Cucherousset, J., Paillisson, J., Carpentier, A., & Chapman, L. J. (2007). Fish emigration from temporary wetlands during drought: the role of physiological tolerance. <i>Fundamental and Applied Limnology-Archiv fur Hydrobiologie</i> , 168(2), 169-178.           | Very high  |
| 10                                             | 3.02 | In the taxon's introduced range, are there known adverse impacts to wild stocks or commercial taxa?                                                                     | Yes      | For review - CABI, 2021. <i>Ameiurus melas</i> (bighead carp). <a href="https://www.cabi.org/isc/datasheet/94466">https://www.cabi.org/isc/datasheet/94466</a> (accessed October 2021)                                                                                      | High       |
| 11                                             | 3.03 | In the taxon's introduced range, are there known adverse impacts to aquaculture?                                                                                        | No       | No documented evidence                                                                                                                                                                                                                                                      | Medium     |
| 12                                             | 3.04 | In the taxon's introduced range, are there known adverse impacts to ecosystem                                                                                           | No       | No documented evidence                                                                                                                                                                                                                                                      | Medium     |
| 13                                             | 3.05 | In the taxon's introduced range, are there known adverse socio-economic impacts?                                                                                        | No       | No documented evidence                                                                                                                                                                                                                                                      | Low        |
| B. Biology/Ecology                             |      |                                                                                                                                                                         |          |                                                                                                                                                                                                                                                                             |            |
| 4. Undesirable (or persistence) traits         |      |                                                                                                                                                                         |          |                                                                                                                                                                                                                                                                             |            |
| 14                                             | 4.01 | Is it likely that the taxon will be poisonous or pose other risks to human health?                                                                                      | No       | Not a harmful species                                                                                                                                                                                                                                                       | High       |
| 15                                             | 4.02 | Is it likely that the taxon will smother one or more native taxa (that are not threatened or protected)?                                                                | Yes      | Reviewd in - CABI, 2021. <i>Ameiurus melas</i> (bighead carp). <a href="https://www.cabi.org/isc/datasheet/94466">https://www.cabi.org/isc/datasheet/94466</a> (accessed October 2021)                                                                                      | Medium     |
| 16                                             | 4.03 | Are there any threatened or protected taxa that the non-native taxon would parasitise in the RA area?                                                                   | Yes      | The species is preadotr and the RA are is inhabited a large number of potential pray species                                                                                                                                                                                | Very high  |
| 17                                             | 4.04 | Is the taxon adaptable in terms of climatic and other environmental conditions, thus enhancing its potential persistence if it has invaded or could invade the RA area? | Yes      | Cucherousset, J., Paillisson, J., Carpentier, A., & Chapman, L. J. (2007). Fish emigration from temporary wetlands during drought: the role of physiological tolerance. <i>Fundamental and Applied Limnology-Archiv fur Hydrobiologie</i> , 168(2), 169-178.                | High       |
| 18                                             | 4.05 | Is the taxon likely to disrupt food-web structure/function in aquatic ecosystems if it has invaded or is likely to invade the RA                                        | Yes      | CABI, 2021. <i>Ameiurus melas</i> (bighead carp). <a href="https://www.cabi.org/isc/datasheet/94466">https://www.cabi.org/isc/datasheet/94466</a> (accessed October 2021)                                                                                                   | Medium     |
| 19                                             | 4.06 | Is the taxon likely to exert adverse impacts on ecosystem services in the RA area?                                                                                      | No       | No documented evidence for negative effect on ecosystem services though this seems to be due to lack of study                                                                                                                                                               | Low        |
| 20                                             | 4.07 | Is it likely that the taxon will host, and/or act as a vector for, recognised pests and infectious agents that are endemic in the RA                                    | No       | Not such pests or infectious agents are known from the RA area                                                                                                                                                                                                              | Medium     |
| 21                                             | 4.08 | Is it likely that the taxon will host, and/or act as a vector for, recognised pests and infectious agents that are absent from (novel to) the RA area?                  | Yes      | Cvijanović, G., Lenhardt, M., Hegediš, A., Gačić, Z., & Jarić, I. <i>Ameiurus melas</i> (rafinesque)-pest or possibility. In eifac symposium on interactions between social, economic and ecological objectives of inland commercial and recreational                       | High       |

|                                 |      |                                                                                                                                                                                           |     |                                                                                                                                                                                                                                                                                                              |           |
|---------------------------------|------|-------------------------------------------------------------------------------------------------------------------------------------------------------------------------------------------|-----|--------------------------------------------------------------------------------------------------------------------------------------------------------------------------------------------------------------------------------------------------------------------------------------------------------------|-----------|
| 22                              | 4.09 | Is it likely that the taxon will achieve a body size that will make it more likely to be released from captivity?                                                                         | No  | <a href="https://www.fishbase.de/summary/Ameiurus-melas.html">https://www.fishbase.de/summary/Ameiurus-melas.html</a>                                                                                                                                                                                        | Medium    |
| 23                              | 4.10 | Is the taxon capable of sustaining itself in a range of water velocity conditions (e.g. versatile in habitat use)?                                                                        | Yes | Not well documented, Usually reported from slowly moving rivers (Page, L.M. and B.M. Burr, 1991. A field guide to freshwater fishes of North America north of Mexico. Houghton Mifflin Company, Boston. 432 p. (Ref. 5723))                                                                                  | Low       |
| 24                              | 4.11 | Is it likely that the taxon's mode of existence (e.g. excretion of by-products) or behaviours (e.g. feeding) will reduce habitat quality for native taxa?                                 | Yes | Indicated (CABI, 2021. Ameiurus melas (bighead carp). <a href="https://www.cabi.org/isc/datasheet/94466">https://www.cabi.org/isc/datasheet/94466</a> (accessed October 2021) but not well documented                                                                                                        | Low       |
| 25                              | 4.12 | Is the taxon likely to maintain a viable population even when present in low densities (or persisting in adverse conditions by way of a dormant form)?                                    | Yes | Not well documented. However it is reported that the escaped individuals were source for established populations                                                                                                                                                                                             | Low       |
| <b>5. Resource exploitation</b> |      |                                                                                                                                                                                           |     |                                                                                                                                                                                                                                                                                                              |           |
| 26                              | 5.01 | Is the taxon likely to consume threatened or protected native taxa in the RA area?                                                                                                        | Yes | Reviewd in CABI, 2021. Ameiurus melas (bighead carp). <a href="https://www.cabi.org/isc/datasheet/94466">https://www.cabi.org/isc/datasheet/94466</a> (accessed October 2021)                                                                                                                                | Medium    |
| 27                              | 5.02 | Is the taxon likely to sequester food resources (including nutrients) to the detriment of native taxa in the RA area?                                                                     | Yes | CABI, 2021. Ameiurus melas (bighead carp). <a href="https://www.cabi.org/isc/datasheet/94466">https://www.cabi.org/isc/datasheet/94466</a> (accessed October 2021)                                                                                                                                           | High      |
| <b>6. Reproduction</b>          |      |                                                                                                                                                                                           |     |                                                                                                                                                                                                                                                                                                              |           |
| 28                              | 6.01 | Is the taxon likely to exhibit parental care and/or to reduce age-at-maturity in response to environmental conditions?                                                                    | Yes | Kottelat, M., & Freyhof, J. (2007). Handbook of European freshwater fishes. Publications Kottelat.                                                                                                                                                                                                           | Very high |
| 29                              | 6.02 | Is the taxon likely to produce viable gametes or propagules (in the RA area)?                                                                                                             | Yes | CABI, 2021. Ameiurus melas (bighead carp). <a href="https://www.cabi.org/isc/datasheet/94466">https://www.cabi.org/isc/datasheet/94466</a> (accessed October 2021)                                                                                                                                           | Very high |
| 30                              | 6.03 | Is the taxon likely to hybridise naturally with native taxa?                                                                                                                              | Yes | Walter, R. P., Gnyra, E. S., Söderberg, L. I., & Heath, D. D. (2014). Rapid genetic identification of brown bullhead (Ameiurus nebulosus), black bullhead (Ameiurus melas) and their hybrids. Conservation Genetics Resources. 6(3), 507-509.                                                                | High      |
| 31                              | 6.04 | Is the taxon likely to be hermaphroditic or to display asexual reproduction?                                                                                                              | No  | Page, L.M. and B.M. Burr, 1991. A field guide to freshwater fishes of North America north of Mexico. Houghton Mifflin Company, Boston. 432 p.                                                                                                                                                                | High      |
| 32                              | 6.05 | Is the taxon dependent on the presence of another taxon (or specific habitat features) to complete its life cycle?                                                                        | No  | Page, L.M. and B.M. Burr, 1991. A field guide to freshwater fishes of North America north of Mexico. Houghton Mifflin Company, Boston. 432 p.                                                                                                                                                                | Very high |
| 33                              | 6.06 | Is the taxon known (or likely) to produce a large number of propagules or offspring within a short time span (e.g. < 1 year)?                                                             | No  | Novomeská, A., & Kováč, V. (2009). Life-history traits of non-native black bullhead Ameiurus melas with comments on its invasive potential. Journal of Applied Ichthyology, 25(1), 79-84.                                                                                                                    | Medium    |
| 34                              | 6.07 | How many time units (days, months, years) does the taxon require to reach the age-at-first-reproduction?                                                                                  | 1   | Copp, G. H., Tarkan, A. S., Masson, G., Godard, M. J., Koščo, J., Kováč, V., ... & Blackwell, B. G. (2016). A review of growth and life-history traits of native and non-native European populations of black bullhead Ameiurus melas. Reviews in Fish Biology and Fisheries. 26(3), 441-469.                | High      |
| <b>7. Dispersal mechanisms</b>  |      |                                                                                                                                                                                           |     |                                                                                                                                                                                                                                                                                                              |           |
| 35                              | 7.01 | How many potential internal vectors/pathways could the taxon use to disperse within the RA area (with suitable protected areas (e.g. MCZ, MPA, SSSI)?                                     | >1  | Hitchhiker, natural increase of distribution, human mediated due to recreational purpose                                                                                                                                                                                                                     | Medium    |
| 36                              | 7.02 | Will any of these vectors/pathways bring the taxon in close proximity to one or more protected areas (e.g. MCZ, MPA, SSSI)?                                                               | Yes | Western South Caucasian lowland (Colchis) is accessible through watercourses                                                                                                                                                                                                                                 | High      |
| 37                              | 7.03 | Does the taxon have a means of actively attaching itself to hard substrata (e.g. ship hulls, pilings, buoys) such that it enhances the likelihood of dispersal?                           | No  | No such evidence exists.                                                                                                                                                                                                                                                                                     | High      |
| 38                              | 7.04 | Is natural dispersal of the taxon likely to occur as eggs (for animals) or as propagules (for plants: seeds, spores) in the RA area?                                                      | No  | Not known from the close proximity, i.e. from the areas with direct connection via watercourse                                                                                                                                                                                                               | High      |
| 39                              | 7.05 | Is natural dispersal of the taxon likely to occur as larvae/juveniles (for animals) or as fragments/seedlings (for plants) in the RA area?                                                | Yes | Due to active swimming abilities, Juveniles can easily disperse through water currents                                                                                                                                                                                                                       | High      |
| 40                              | 7.06 | Are older life stages of the taxon likely to migrate in the RA area for reproduction?                                                                                                     | No  | Species is not known as long distance migrant for reproduction. While no populations are known to close proximity of RA area, than no such expectation                                                                                                                                                       | High      |
| 41                              | 7.07 | Are propagules or eggs of the taxon likely to be dispersed in the RA area by other animals?                                                                                               | No  | No such cases are known                                                                                                                                                                                                                                                                                      | High      |
| 42                              | 7.08 | Is dispersal of the taxon along any of the vectors/pathways mentioned in the previous seven questions (35-41; i.e. both unintentional or intentional) likely to be                        | Yes | Not well documented though expected                                                                                                                                                                                                                                                                          | Low       |
| 43                              | 7.09 | Is dispersal of the taxon density dependent?                                                                                                                                              | No  | Not known, not documented                                                                                                                                                                                                                                                                                    | Low       |
| <b>8. Tolerance attributes</b>  |      |                                                                                                                                                                                           |     |                                                                                                                                                                                                                                                                                                              |           |
| 44                              | 8.01 | Is the taxon able to withstand being out of water for extended periods (e.g. minimum of one or more hours) at some stage of its life cycle?                                               | No  | Not a documented evidence                                                                                                                                                                                                                                                                                    | Medium    |
| 45                              | 8.02 | Is the taxon tolerant of a wide range of water quality conditions relevant to that taxon? [In the Justification field, indicate the relevant water quality variable(s) being considered.] | Yes | temperature, dissolved oxygen, turbidity and salinity - Cucherousset, J., Paillisson, J., Carpentier, A., & Chapman, L. J. (2007). Fish emigration from temporary wetlands during drought: the role of physiological tolerance. Fundamental and Applied Limnology-Archiv für Hydrobiologie, 168(2), 169-178. | High      |

|                          |      |                                                                                                                                                              |           |                                            |        |
|--------------------------|------|--------------------------------------------------------------------------------------------------------------------------------------------------------------|-----------|--------------------------------------------|--------|
| 46                       | 8.03 | Can the taxon be controlled or eradicated in the wild with chemical, biological, or other agents/means?                                                      | No        | No such a practice exists                  | Medium |
| 47                       | 8.04 | Is the taxon likely to tolerate or benefit from environmental/human disturbance?                                                                             | No        | No such evidence exists                    | Low    |
| 48                       | 8.05 | Is the taxon able to tolerate salinity levels that are higher or lower than those found in its usual environment?                                            | Yes       | Though not well documented                 | Low    |
| 49                       | 8.06 | Are there effective natural enemies (predators) of the taxon present in the RA                                                                               | No        | No such species are present in the RA area | High   |
| <b>C. Climate change</b> |      |                                                                                                                                                              |           |                                            |        |
| <b>9. Climate change</b> |      |                                                                                                                                                              |           |                                            |        |
| 50                       | 9.01 | Under the predicted future climatic conditions, are the risks of entry into the RA area posed by the taxon likely to increase, decrease or not change?       | No change | Professional judgement                     | Medium |
| 51                       | 9.02 | Under the predicted future climatic conditions, are the risks of establishment posed by the taxon likely to increase, decrease or not change?                | No change | Professional judgement                     | Medium |
| 52                       | 9.03 | Under the predicted future climatic conditions, are the risks of dispersal within the RA area posed by the taxon likely to increase, decrease or not change? | No change | Professional judgement                     | Low    |
| 53                       | 9.04 | Under the predicted future climatic conditions, what is the likely magnitude of future potential impacts on biodiversity and/or ecological integrity/status? | Higher    | Professional judgement                     | Low    |
| 54                       | 9.05 | Under the predicted future climatic conditions, what is the likely magnitude of future potential impacts on ecosystem structure and/or function?             | Higher    | Professional judgement                     | Medium |
| 55                       | 9.06 | Under the predicted future climatic conditions, what is the likely magnitude of future potential impacts on ecosystem services/socio-economic factors?       | Higher    | Professional judgement                     | Medium |

| Statistics                                     |             |
|------------------------------------------------|-------------|
| Scores                                         |             |
| <b>BRA</b>                                     | <b>33.0</b> |
| <b>BRA Outcome</b>                             | <b>-</b>    |
| <b>BRA+CCA</b>                                 | <b>39.0</b> |
| <b>BRA+CCA Outcome</b>                         | <b>-</b>    |
| Score partition                                |             |
| <b>A. Biogeography/Historical</b>              | <b>11.0</b> |
| 1. Domestication/Cultivation                   | 4.0         |
| 2. Climate, distribution and introduction risk | 1.0         |
| 3. Invasive elsewhere                          | 6.0         |
| <b>B. Biology/Ecology</b>                      | <b>22.0</b> |
| 4. Undesirable (or persistence) traits         | 8.0         |
| 5. Resource exploitation                       | 7.0         |
| 6. Reproduction                                | 4.0         |
| 7. Dispersal mechanisms                        | 0.0         |
| 8. Tolerance attributes                        | 3.0         |
| <b>C. Climate change</b>                       | <b>6.0</b>  |
| 9. Climate change                              | 6.0         |
| Answered Questions                             |             |
| <b>Total</b>                                   | <b>55</b>   |
| <b>A. Biogeography/Historical</b>              | <b>13</b>   |
| 1. Domestication/Cultivation                   | 3           |
| 2. Climate, distribution and introduction risk | 5           |
| 3. Invasive elsewhere                          | 5           |
| <b>B. Biology/Ecology</b>                      | <b>36</b>   |
| 4. Undesirable (or persistence) traits         | 12          |
| 5. Resource exploitation                       | 2           |
| 6. Reproduction                                | 7           |
| 7. Dispersal mechanisms                        | 9           |
| 8. Tolerance attributes                        | 6           |
| <b>C. Climate change</b>                       | <b>6</b>    |
| 9. Climate change                              | 6           |
| Sectors affected                               |             |
| <b>Commercial</b>                              | <b>12</b>   |
| <b>Environmental</b>                           | <b>12</b>   |
| <b>Species or population nuisance traits</b>   | <b>19</b>   |

| Thresholds     |             |
|----------------|-------------|
| <b>BRA</b>     | <b>-</b>    |
| <b>BRA+CCA</b> | <b>-</b>    |
| Confidence     |             |
| <b>BRA+CCA</b> | <b>0.61</b> |
| <b>BRA</b>     | <b>0.64</b> |
| <b>CCA</b>     | <b>0.42</b> |

| Date and Time       |
|---------------------|
| 04/05/2022 11:48:30 |

## AS-ISK v2

| Taxon and Assessor details         |                                                                                                                       |
|------------------------------------|-----------------------------------------------------------------------------------------------------------------------|
| Category                           | Fishes and Lampreys (freshwater)                                                                                      |
| Taxon name                         | <i>Ameiurus melas</i>                                                                                                 |
| Common name                        | black bullhead                                                                                                        |
| Assessor                           | Giorgi Epitashvili                                                                                                    |
| Risk screening context             |                                                                                                                       |
| Reason and socio-economic benefits | Economic benefits from <i>Ameiurus</i> spp. aquaculture occurred primarily within eastern Europe                      |
| Risk assessment area               | South Caucasus                                                                                                        |
| Taxonomy                           | <i>Ameiurus melas</i> (Rafinesque, 1820)                                                                              |
| Native range                       | Native to Canada, USA and Mexico                                                                                      |
| Introduced range                   | Black bullhead have been introduced to Europe, South America and many states in the USA and                           |
| URL                                | <a href="https://www.fishbase.de/summary/ameiurus-melas.html">https://www.fishbase.de/summary/ameiurus-melas.html</a> |

|                                                |      |                                                                                                                                                                  | Response | Justification (references and/or other information)                                                                                                                                                                                                                                                                                                                                                                                                                                                                                                                                                                                                                                                                                                                                    | Confidence |
|------------------------------------------------|------|------------------------------------------------------------------------------------------------------------------------------------------------------------------|----------|----------------------------------------------------------------------------------------------------------------------------------------------------------------------------------------------------------------------------------------------------------------------------------------------------------------------------------------------------------------------------------------------------------------------------------------------------------------------------------------------------------------------------------------------------------------------------------------------------------------------------------------------------------------------------------------------------------------------------------------------------------------------------------------|------------|
| A. Biogeography/Historical                     |      |                                                                                                                                                                  |          |                                                                                                                                                                                                                                                                                                                                                                                                                                                                                                                                                                                                                                                                                                                                                                                        |            |
| 1. Domestication/Cultivation                   |      |                                                                                                                                                                  |          |                                                                                                                                                                                                                                                                                                                                                                                                                                                                                                                                                                                                                                                                                                                                                                                        |            |
| 1                                              | 1.01 | Has the taxon been the subject of domestication (or cultivation) for at least 20 generations?                                                                    | Yes      | The black bullhead ( <i>Ameiurus melas</i> ; family Ictaluridae) is a scaleless fish found naturally in waters from southern Canada to Mexico, from the Rocky Mountains to the Western slopes of the Appalachians (Smith 1985). It has, however, been stocked in many areas outside of its natural range (Smith 1985).                                                                                                                                                                                                                                                                                                                                                                                                                                                                 | Very high  |
| 2                                              | 1.02 | Is the taxon harvested in the wild and likely to be sold or used in its live form?                                                                               | Yes      | Black bullheads are not generally considered an important gamefish in Texas, though they are readily fished for by anglers in the Panhandle, and in far East Texas. A variety of baits may be used to catch them, but worms are usually the best. The largest specimen reported to date in Texas was 5.15 pounds.                                                                                                                                                                                                                                                                                                                                                                                                                                                                      | Medium     |
| 3                                              | 1.03 | Does the taxon have invasive races, varieties, sub-taxa or congeners?                                                                                            | Yes      | In Europe <i>A. melas</i> forms dense stunted populations which makes it unpopular. Several countries report adverse ecological impact after introduction.                                                                                                                                                                                                                                                                                                                                                                                                                                                                                                                                                                                                                             | Very high  |
| 2. Climate, distribution and introduction risk |      |                                                                                                                                                                  |          |                                                                                                                                                                                                                                                                                                                                                                                                                                                                                                                                                                                                                                                                                                                                                                                        |            |
| 4                                              | 2.01 | How similar are the climatic conditions of the Risk Assessment (RA) area and the taxon's native range?                                                           | Medium   | World Map of the Köppen-Geiger climate classification                                                                                                                                                                                                                                                                                                                                                                                                                                                                                                                                                                                                                                                                                                                                  | Medium     |
| 5                                              | 2.02 | What is the quality of the climate matching data?                                                                                                                | Medium   | World Map of the Köppen-Geiger climate classification                                                                                                                                                                                                                                                                                                                                                                                                                                                                                                                                                                                                                                                                                                                                  | Medium     |
| 6                                              | 2.03 | Is the taxon already present outside of captivity in the RA area?                                                                                                | No       | No such fact has been detected                                                                                                                                                                                                                                                                                                                                                                                                                                                                                                                                                                                                                                                                                                                                                         | Very high  |
| 7                                              | 2.04 | How many potential vectors could the taxon use to enter in the RA area?                                                                                          | One      | This species may be introduced by humans for aquacultural purposes.                                                                                                                                                                                                                                                                                                                                                                                                                                                                                                                                                                                                                                                                                                                    | Medium     |
| 8                                              | 2.05 | Is the taxon currently found in close proximity to, and likely to enter into, the RA area in the near future (e.g. unintentional and intentional introductions)? | No       | There is no evidence at this stage that this species has been established around the SC region.                                                                                                                                                                                                                                                                                                                                                                                                                                                                                                                                                                                                                                                                                        | Medium     |
| 3. Invasive elsewhere                          |      |                                                                                                                                                                  |          |                                                                                                                                                                                                                                                                                                                                                                                                                                                                                                                                                                                                                                                                                                                                                                                        |            |
| 9                                              | 3.01 | Has the taxon become naturalised (established viable populations) outside its native range?                                                                      | Yes      | <i>A. melas</i> is known to have introduced to many European countries, but established self-sustaining populations have only been confirmed for the Belgium Province of Wallonie, and the Netherlands (Verreycken et al. 2010), Austria (Wiesner et al. 2010), Germany (Wolter and Röhr 2010), Czech Republic (Musil et al. 2008), England (Wheeler 1978; this study), France (Copp 1989; Cucherousset et al. 2008), Hungary (Bódis et al. 2012), Italy (Pedicillo et al. 2009), Poland (Nowak et al. 2010a, 2010b), Portugal (Gante and Santos 2002; Ribeiro et al. 2006), Romania (Wilhelm 1998; Gaviloaie and Falka 2006), Serbia (Cvijanović et al. 2005), Slovakia (Koščo et al. 2010) and Spain (Miranda et al. 2010; De Miguel et al. 2014). Switzerland (Wittenberg 2005) and | Very high  |
| 10                                             | 3.02 | In the taxon's introduced range, are there known adverse impacts to wild stocks or commercial taxa?                                                              | Yes      | In natural waters, the introductions have resulted in many cases in economically profitable fisheries, although most introductions have failed or led to unwanted consequences in the form of reduced or collapsed native fish stocks (Turchini et al., 2008).                                                                                                                                                                                                                                                                                                                                                                                                                                                                                                                         | Very high  |
| 11                                             | 3.03 | In the taxon's introduced range, are there known adverse impacts to aquaculture?                                                                                 | No       | According to cabi.org, the impact on aquaculture is assessed as positive.                                                                                                                                                                                                                                                                                                                                                                                                                                                                                                                                                                                                                                                                                                              | High       |
| 12                                             | 3.04 | In the taxon's introduced range, are there known adverse impacts to ecosystem services?                                                                          | Yes      | In water bodies used by anglers, their perception of the angling value may be reduced by the species' presence (Aislabe et al. 2019). For instance a fishery in North London succumbed to this highly efficient invader, and the local angling club had lost one of                                                                                                                                                                                                                                                                                                                                                                                                                                                                                                                    | High       |
| 13                                             | 3.05 | In the taxon's introduced range, are there known adverse socio-economic impacts?                                                                                 | Yes      | Benthivorous fish in shallow, aquatic systems have been correlated with increased turbidity and declines in macrophyte production and wildlife use (Braig & Johnson 2003).                                                                                                                                                                                                                                                                                                                                                                                                                                                                                                                                                                                                             | High       |
| B. Biology/Ecology                             |      |                                                                                                                                                                  |          |                                                                                                                                                                                                                                                                                                                                                                                                                                                                                                                                                                                                                                                                                                                                                                                        |            |
| 4. Undesirable (or persistence) traits         |      |                                                                                                                                                                  |          |                                                                                                                                                                                                                                                                                                                                                                                                                                                                                                                                                                                                                                                                                                                                                                                        |            |
| 14                                             | 4.01 | Is it likely that the taxon will be poisonous or pose other risks to human health?                                                                               | Yes      | <i>A. melas</i> can cause a painful sting if pectoral spines puncture human flesh due to the small amounts of venom at the ends of spine, which can cause pain for up to a week (Etnier and Starnes, 1993; Rose, 2006; Aislabe et al. 2019).                                                                                                                                                                                                                                                                                                                                                                                                                                                                                                                                           | Very high  |
| 15                                             | 4.02 | Is it likely that the taxon will smother one or more native taxa (that are not threatened or protected)?                                                         | Yes      | Black bullheads tend to be found in high local abundance, their behaviour could therefore interfere with accompanying species and negatively affect the behaviour of native predators and prey (cabi.org).                                                                                                                                                                                                                                                                                                                                                                                                                                                                                                                                                                             | Very high  |
| 16                                             | 4.03 | Are there any threatened or protected taxa that the non-native taxon would parasitise in the RA area?                                                            | Yes      | There are many endemic and threatened species in the SC region which would be affected by <i>A. melas</i> e.g. <i>Salmo</i> spp. <i>Luciobarbus capito</i> , <i>Acipenser</i> spp. etc.                                                                                                                                                                                                                                                                                                                                                                                                                                                                                                                                                                                                | High       |

|                                 |      |                                                                                                                                                                         |                |                                                                                                                                                                                                                       |           |
|---------------------------------|------|-------------------------------------------------------------------------------------------------------------------------------------------------------------------------|----------------|-----------------------------------------------------------------------------------------------------------------------------------------------------------------------------------------------------------------------|-----------|
| 17                              | 4.04 | Is the taxon adaptable in terms of climatic and other environmental conditions, thus enhancing its potential persistence if it has invaded or could invade the RA area? | Yes            | This species has been successfully established in some European countries and such a thing is expected in the Caucasus as well.                                                                                       | High      |
| 18                              | 4.05 | Is the taxon likely to disrupt food-web structure/function in aquatic ecosystems if it has invaded or is likely to invade the RA area?                                  | Yes            | Investigation is needed to assess Ameiurus population trends and impacts, such as decline of reservoir water quality and food web structure alteration in some regions.                                               | Medium    |
| 19                              | 4.06 | Is the taxon likely to exert adverse impacts on ecosystem services in the RA area?                                                                                      | Yes            | Similar cases have already been reported in some countries (e.g. in UK) and the same is expected to happen in the SC region.                                                                                          | High      |
| 20                              | 4.07 | Is it likely that the taxon will host, and/or act as a vector for, recognised pests and infectious agents that are endemic in the RA area?                              | Not applicable | Such data is not available for the SC region.                                                                                                                                                                         | Low       |
| 21                              | 4.08 | Is it likely that the taxon will host, and/or act as a vector for, recognised pests and infectious agents that are absent from (novel to) the RA area?                  | Not applicable | Such data is not available for the SC region.                                                                                                                                                                         | Low       |
| 22                              | 4.09 | Is it likely that the taxon will achieve a body size that will make it more likely to be released from captivity?                                                       | Yes            | Max length is 66.0 cm TL male/unsexed, common length : 26.6 cm TL male/unsexed, max. published weight: 3.6 kg. This species is used for aquacultural purposes.                                                        | Very high |
| 23                              | 4.10 | Is the taxon capable of sustaining itself in a range of water velocity conditions (e.g. versatile in habitat use)?                                                      | No             | Inhabits pools, backwaters, and sluggish current over soft substrates in creeks and small to large rivers; impoundments, oxbows, and ponds.                                                                           | Medium    |
| 24                              | 4.11 | Is it likely that the taxon's mode of existence (e.g. excretion of by-products) or behaviours (e.g. feeding) will reduce habitat quality for native taxa?               | Yes            | A. melas has high potential impact on water quality. Ameiurus melas is related to the physico-chemical dimension of water quality. Changes in water transparency and increase of turbidity (Braig and Johnson, 2003). | Very high |
| 25                              | 4.12 | Is the taxon likely to maintain a viable population even when present in low densities (or persisting in adverse conditions by way of a dormant form)?                  | No             | Such a fact is not known                                                                                                                                                                                              | Low       |
| <b>5. Resource exploitation</b> |      |                                                                                                                                                                         |                |                                                                                                                                                                                                                       |           |
| 26                              | 5.01 | Is the taxon likely to consume threatened or protected native taxa in the RA area?                                                                                      | Yes            | The probability of this is high if the species is distributed in the region. The following species may be impacted: Salmo spp, Acipenser spp, Gobies, Luciobarbus capito, etc.                                        | Very high |
| 27                              | 5.02 | Is the taxon likely to sequester food resources (including nutrients) to the detriment of native taxa in the RA area?                                                   | Yes            | This species will be in competition with local fish e.g. in feeding.                                                                                                                                                  | Very high |
| <b>6. Reproduction</b>          |      |                                                                                                                                                                         |                |                                                                                                                                                                                                                       |           |
| 28                              | 6.01 | Is the taxon likely to exhibit parental care and/or to reduce age-at-maturity in response to environmental conditions?                                                  | Yes            | Maximum length of parental care in A. melas is 29 days.                                                                                                                                                               | Medium    |
| 29                              | 6.02 | Is the taxon likely to produce viable gametes or propagules (in the RA area)?                                                                                           | No             | Currently this species is not occurring in the SC region.                                                                                                                                                             | Very high |
| 30                              | 6.03 | Is the taxon likely to hybridise naturally with native taxa?                                                                                                            | No             | Such a fact is not known.                                                                                                                                                                                             | Low       |
| 31                              | 6.04 | Is the taxon likely to be hermaphroditic or to display asexual reproduction?                                                                                            | No             | Such a fact is not known.                                                                                                                                                                                             | Low       |
| 32                              | 6.05 | Is the taxon dependent on the presence of another taxon (or specific habitat features) to complete its life cycle?                                                      | No             | Such a fact is not known.                                                                                                                                                                                             | Low       |
| 33                              | 6.06 | Is the taxon known (or likely) to produce a large number of propagules or offspring within a short time span (e.g. < 1 year)?                                           | No             | The females scoop out a small hole or depression in the lake floor and lay 2000 to 3800 eggs.                                                                                                                         | Medium    |
| 34                              | 6.07 | How many time units (days, months, years) does the taxon require to reach the age-at-first-reproduction?                                                                | 1              | Data deficient                                                                                                                                                                                                        | Low       |
| <b>7. Dispersal mechanisms</b>  |      |                                                                                                                                                                         |                |                                                                                                                                                                                                                       |           |
| 35                              | 7.01 | How many potential internal vectors/pathways could the taxon use to disperse within the RA area (with suitable vectors/pathways)?                                       | One            | This species can be spread in the SC region by humans for aquacultural purposes.                                                                                                                                      | High      |
| 36                              | 7.02 | Will any of these vectors/pathways bring the taxon in close proximity to one or more protected areas (e.g. MCZ, MPA, SSSI)?                                             | Yes            | The probability of this is high.                                                                                                                                                                                      | High      |
| 37                              | 7.03 | Does the taxon have a means of actively attaching itself to hard substrata (e.g. ship hulls, pilings, buoys) such that it enhances the likelihood of dispersal?         | No             | This species does not have such means.                                                                                                                                                                                | High      |
| 38                              | 7.04 | Is natural dispersal of the taxon likely to occur as eggs (for animals) or as propagules (for plants: seeds, spores) in the RA area?                                    | No             | This species does not occur in the SC region.                                                                                                                                                                         | Very high |
| 39                              | 7.05 | Is natural dispersal of the taxon likely to occur as larvae/juveniles (for animals) or as fragments/seedlings (for plants) in the RA area?                              | No             | This species does not occur in the SC region.                                                                                                                                                                         | Very high |
| 40                              | 7.06 | Are older life stages of the taxon likely to migrate in the RA area for reproduction?                                                                                   | No             | This species does not occur in the SC region.                                                                                                                                                                         | Very high |
| 41                              | 7.07 | Are propagules or eggs of the taxon likely to be dispersed in the RA area by other animals?                                                                             | No             | This species does not occur in the SC region.                                                                                                                                                                         | Very high |
| 42                              | 7.08 | Is dispersal of the taxon along any of the vectors/pathways mentioned in the previous seven questions (35–41; i.e. both unintentional or intentional) likely to be?     | No             | This species does not occur in the SC region and at this stage it is impossible to determine.                                                                                                                         | Low       |
| 43                              | 7.09 | Is dispersal of the taxon density dependent?                                                                                                                            | Not applicable | Such data is not available                                                                                                                                                                                            | Low       |
| <b>8. Tolerance attributes</b>  |      |                                                                                                                                                                         |                |                                                                                                                                                                                                                       |           |

|    |      |                                                                                                                                                                              |     |                                                                                                                                                                                                                                                                                                  |           |
|----|------|------------------------------------------------------------------------------------------------------------------------------------------------------------------------------|-----|--------------------------------------------------------------------------------------------------------------------------------------------------------------------------------------------------------------------------------------------------------------------------------------------------|-----------|
| 44 | 8.01 | Is the taxon able to withstand being out of water for extended periods (e.g. minimum of one or more hours) at some stage of its life cycle?                                  | No  | This species could not exist without water                                                                                                                                                                                                                                                       | High      |
| 45 | 8.02 | Is the taxon tolerant of a wide range of water quality conditions relevant to that taxon? [In the Justification field, indicate the relevant water quality variable(s) being | Yes | A. melas has considerable tolerance to water pollution, turbidity, low oxygen concentration, elevated temperatures and a range of pH values.                                                                                                                                                     | Very high |
| 46 | 8.03 | Can the taxon be controlled or eradicated in the wild with chemical, biological, or other agents/means?                                                                      | Yes | The application of trapping and electric fishing to controlling black bullhead Ameiurus melas was relatively effective in a French lake as no compensatory responses were recorded. In contrast, compensatory responses were detected in A. melas populations elsewhere following mass removals. | High      |
| 47 | 8.04 | Is the taxon likely to tolerate or benefit from environmental/human disturbance?                                                                                             | Yes | This species has spread by humans in many regions of the world.                                                                                                                                                                                                                                  | Very high |
| 48 | 8.05 | Is the taxon able to tolerate salinity levels that are higher or lower than those found in its usual environment?                                                            | No  | A. melas is typically freshwater species and not found in salt waters.                                                                                                                                                                                                                           | High      |
| 49 | 8.06 | Are there effective natural enemies (predators) of the taxon present in the RA area?                                                                                         | Yes | There are several potential predators distributed in the SC region which can control A. melas population: Esox lucius, Sander lucioperca, Silurus glanis, Salmo spp, etc.                                                                                                                        | Very high |

#### C. Climate change

##### 9. Climate change

|    |      |                                                                                                                                                              |           |               |        |
|----|------|--------------------------------------------------------------------------------------------------------------------------------------------------------------|-----------|---------------|--------|
| 50 | 9.01 | Under the predicted future climatic conditions, are the risks of entry into the RA area posed by the taxon likely to increase, decrease or not change?       | No change | Own judgement | Medium |
| 51 | 9.02 | Under the predicted future climatic conditions, are the risks of establishment posed by the taxon likely to increase, decrease or not change?                | No change | Own judgement | Medium |
| 52 | 9.03 | Under the predicted future climatic conditions, are the risks of dispersal within the RA area posed by the taxon likely to increase, decrease or not change? | No change | Own judgement | Medium |
| 53 | 9.04 | Under the predicted future climatic conditions, what is the likely magnitude of future potential impacts on biodiversity and/or ecological integrity/status? | No change | Own judgement | Medium |
| 54 | 9.05 | Under the predicted future climatic conditions, what is the likely magnitude of future potential impacts on ecosystem structure and/or function?             | No change | Own judgement | Medium |
| 55 | 9.06 | Under the predicted future climatic conditions, what is the likely magnitude of future potential impacts on ecosystem services/socio-economic factors?       | Lower     | Own judgement | Medium |

| Statistics                                     |             |
|------------------------------------------------|-------------|
| Scores                                         |             |
| <b>BRA</b>                                     | <b>26.5</b> |
| <b>BRA Outcome</b>                             | <b>-</b>    |
| <b>BRA+CCA</b>                                 | <b>24.5</b> |
| <b>BRA+CCA Outcome</b>                         | <b>-</b>    |
| Score partition                                |             |
| <b>A. Biogeography/Historical</b>              | <b>14.5</b> |
| 1. Domestication/Cultivation                   | 4.0         |
| 2. Climate, distribution and introduction risk | 0.0         |
| 3. Invasive elsewhere                          | 10.5        |
| <b>B. Biology/Ecology</b>                      | <b>12.0</b> |
| 4. Undesirable (or persistence) traits         | 8.0         |
| 5. Resource exploitation                       | 7.0         |
| 6. Reproduction                                | 1.0         |
| 7. Dispersal mechanisms                        | -4.0        |
| 8. Tolerance attributes                        | 0.0         |
| <b>C. Climate change</b>                       | <b>-2.0</b> |
| 9. Climate change                              | -2.0        |
| Answered Questions                             |             |
| <b>Total</b>                                   | <b>55</b>   |
| <b>A. Biogeography/Historical</b>              | <b>13</b>   |
| 1. Domestication/Cultivation                   | 3           |
| 2. Climate, distribution and introduction risk | 5           |
| 3. Invasive elsewhere                          | 5           |
| <b>B. Biology/Ecology</b>                      | <b>36</b>   |
| 4. Undesirable (or persistence) traits         | 12          |
| 5. Resource exploitation                       | 2           |
| 6. Reproduction                                | 7           |
| 7. Dispersal mechanisms                        | 9           |
| 8. Tolerance attributes                        | 6           |
| <b>C. Climate change</b>                       | <b>6</b>    |
| 9. Climate change                              | 6           |
| Sectors affected                               |             |
| <b>Commercial</b>                              | <b>7</b>    |
| <b>Environmental</b>                           | <b>12</b>   |
| <b>Species or population nuisance traits</b>   | <b>7</b>    |

| Thresholds |         |      |
|------------|---------|------|
|            | BRA     | -    |
|            | BRA+CCA | -    |
| Confidence |         |      |
|            | BRA+CCA | 0.69 |
|            | BRA     | 0.71 |
|            | CCA     | 0.50 |

| Date and Time       |  |
|---------------------|--|
| 02/05/2022 16:11:33 |  |

## AS-ISK v2

| Taxon and Assessor details         |                                                                                                                       |
|------------------------------------|-----------------------------------------------------------------------------------------------------------------------|
| Category                           | Fishes and Lampreys (freshwater)                                                                                      |
| Taxon name                         | <i>Ameiurus melas</i>                                                                                                 |
| Common name                        | black bullhead                                                                                                        |
| Assessor                           | Tatia Kuljanishvili                                                                                                   |
| Risk screening context             |                                                                                                                       |
| Reason and socio-economic benefits | Introduced species in Europe                                                                                          |
| Risk assessment area               | South Caucasus                                                                                                        |
| Taxonomy                           | <i>Ameiurus melas</i>                                                                                                 |
| Native range                       | Central eastern North America                                                                                         |
| Introduced range                   | Europe                                                                                                                |
| URL                                | <a href="https://www.fishbase.se/summary/Ameiurus-melas.html">https://www.fishbase.se/summary/Ameiurus-melas.html</a> |

|                                                |      |                                                                                                                                                                         | Response | Justification (references and/or other information)                                                                                                                                                                                                                                                                                                                                                                                                                                                                                                                                                                                                      | Confidence |
|------------------------------------------------|------|-------------------------------------------------------------------------------------------------------------------------------------------------------------------------|----------|----------------------------------------------------------------------------------------------------------------------------------------------------------------------------------------------------------------------------------------------------------------------------------------------------------------------------------------------------------------------------------------------------------------------------------------------------------------------------------------------------------------------------------------------------------------------------------------------------------------------------------------------------------|------------|
| A. Biogeography/Historical                     |      |                                                                                                                                                                         |          |                                                                                                                                                                                                                                                                                                                                                                                                                                                                                                                                                                                                                                                          |            |
| 1. Domestication/Cultivation                   |      |                                                                                                                                                                         |          |                                                                                                                                                                                                                                                                                                                                                                                                                                                                                                                                                                                                                                                          |            |
| 1                                              | 1.01 | Has the taxon been the subject of domestication (or cultivation) for at least 20 generations?                                                                           | Yes      | Is used in aquaculture                                                                                                                                                                                                                                                                                                                                                                                                                                                                                                                                                                                                                                   | Very high  |
| 2                                              | 1.02 | Is the taxon harvested in the wild and likely to be sold or used in its live form?                                                                                      | Yes      | Has been transported live for improvement of fish stocks in Europe (Ribiero et al 2006)                                                                                                                                                                                                                                                                                                                                                                                                                                                                                                                                                                  | Very high  |
| 3                                              | 1.03 | Does the taxon have invasive races, varieties, sub-taxa or congeners?                                                                                                   | Yes      | Yes, for example A. nebulosus                                                                                                                                                                                                                                                                                                                                                                                                                                                                                                                                                                                                                            | Very high  |
| 2. Climate, distribution and introduction risk |      |                                                                                                                                                                         |          |                                                                                                                                                                                                                                                                                                                                                                                                                                                                                                                                                                                                                                                          |            |
| 4                                              | 2.01 | How similar are the climatic conditions of the Risk Assessment (RA) area and the taxon's native range?                                                                  | High     | They are somehow similar. Out of 18 stations 4, 3 and 6 stations landed on values of 7, 8 and 9                                                                                                                                                                                                                                                                                                                                                                                                                                                                                                                                                          | Medium     |
| 5                                              | 2.02 | What is the quality of the climate matching data?                                                                                                                       | Medium   | Quality is medium                                                                                                                                                                                                                                                                                                                                                                                                                                                                                                                                                                                                                                        | High       |
| 6                                              | 2.03 | Is the taxon already present outside of captivity in the RA area?                                                                                                       | No       | No. The species has never been spotted outside its captivity in RA area. There are no documented records of it.                                                                                                                                                                                                                                                                                                                                                                                                                                                                                                                                          | Very high  |
| 7                                              | 2.04 | How many potential vectors could the taxon use to enter in the RA area?                                                                                                 | >1       | Aquaculture, recreational fisheries                                                                                                                                                                                                                                                                                                                                                                                                                                                                                                                                                                                                                      | High       |
| 8                                              | 2.05 | Is the taxon currently found in close proximity to, and likely to enter into, the RA area in the near future (e.g. unintentional and intentional introductions)?        | Yes      | This species is present in Turkey and is likely to enter RA                                                                                                                                                                                                                                                                                                                                                                                                                                                                                                                                                                                              | Very high  |
| 3. Invasive elsewhere                          |      |                                                                                                                                                                         |          |                                                                                                                                                                                                                                                                                                                                                                                                                                                                                                                                                                                                                                                          |            |
| 9                                              | 3.01 | Has the taxon become naturalised (established viable populations) outside its native range?                                                                             | Yes      | It has been living in European countries for more than a century "Ebro and Tagus drainages (Iberian Peninsula), most drainages of France, locally in Italy, the Netherlands and Germany; distribution could be wider" <a href="https://www.fishbase.se/summary/Ameiurus-">https://www.fishbase.se/summary/Ameiurus-</a>                                                                                                                                                                                                                                                                                                                                  | Very high  |
| 10                                             | 3.02 | In the taxon's introduced range, are there known adverse impacts to wild stocks or commercial taxa?                                                                     | Yes      | Impacts native fish species by predation (Leunda et al 2008) and competition with other predators (kreutzenberger et al 2008)                                                                                                                                                                                                                                                                                                                                                                                                                                                                                                                            | Very high  |
| 11                                             | 3.03 | In the taxon's introduced range, are there known adverse impacts to aquaculture?                                                                                        | Yes      | Markovic et al 2012 considered A. melas as species impacting serbian aquaculture                                                                                                                                                                                                                                                                                                                                                                                                                                                                                                                                                                         | High       |
| 12                                             | 3.04 | In the taxon's introduced range, are there known adverse impacts to ecosystem                                                                                           | Yes      | 1) Affects water quality; 2) can be transmitting diseases; Holcik, 1991; Moyle and Light, 1996; Vitule et al., 2009                                                                                                                                                                                                                                                                                                                                                                                                                                                                                                                                      | High       |
| 13                                             | 3.05 | In the taxon's introduced range, are there known adverse socio-economic impacts?                                                                                        | No       | No information is available about the socio-economic impact of the given species.                                                                                                                                                                                                                                                                                                                                                                                                                                                                                                                                                                        | Low        |
| B. Biology/Ecology                             |      |                                                                                                                                                                         |          |                                                                                                                                                                                                                                                                                                                                                                                                                                                                                                                                                                                                                                                          |            |
| 4. Undesirable (or persistence) traits         |      |                                                                                                                                                                         |          |                                                                                                                                                                                                                                                                                                                                                                                                                                                                                                                                                                                                                                                          |            |
| 14                                             | 4.01 | Is it likely that the taxon will be poisonous or pose other risks to human health?                                                                                      | No       | Not poisonous. Does not pose risks to human health See: <a href="https://fishbase.mnhn.fr/summary/Ameiurus-melas.html">https://fishbase.mnhn.fr/summary/Ameiurus-melas.html</a>                                                                                                                                                                                                                                                                                                                                                                                                                                                                          | Very high  |
| 15                                             | 4.02 | Is it likely that the taxon will smother one or more native taxa (that are not threatened or protected)?                                                                | Yes      | Yes "Amongst the life history and ecological attributes that seem to characterize the success of the black bullhead as an invasive species are: high fecundity, parental care of the offspring, voracious and versatile feeding habits, habitat and water quality flexibility (withstanding water temperatures as high as 30° C, high turbidity, a wide range of pH and even hypoxia) and tolerance to pollution, as has been shown for many other invasive fish species in Mediterranean catchments (Alcaraz et al., 2005; Vila-Gispert et al., 2005; Ribeiro et al., 2008). These characteristics constitute a real rather than a potential threat for | Very high  |
| 16                                             | 4.03 | Are there any threatened or protected taxa that the non-native taxon would parasitise in the RA area?                                                                   | No       | does not parasite See: <a href="https://fishbase.mnhn.fr/summary/Ameiurus-melas.html">https://fishbase.mnhn.fr/summary/Ameiurus-melas.html</a>                                                                                                                                                                                                                                                                                                                                                                                                                                                                                                           | Very high  |
| 17                                             | 4.04 | Is the taxon adaptable in terms of climatic and other environmental conditions, thus enhancing its potential persistence if it has invaded or could invade the RA area? | Yes      | it can "withstanding water temperatures as high as 30° C, high turbidity, a wide range of pH and even hypoxia" <a href="https://www.ucm.es/data/cont/docs/568-2013-11-22-Leundaetal2008.pdf">https://www.ucm.es/data/cont/docs/568-2013-11-22-Leundaetal2008.pdf</a>                                                                                                                                                                                                                                                                                                                                                                                     | Very high  |
| 18                                             | 4.05 | Is the taxon likely to disrupt food-web structure/function in aquatic ecosystems if it has invaded or is likely to invade the RA area?                                  | Yes      | it can "withstanding water temperatures as high as 30° C, high turbidity, a wide range of pH and even hypoxia" <a href="https://www.ucm.es/data/cont/docs/568-2013-11-22-Leundaetal2008.pdf">https://www.ucm.es/data/cont/docs/568-2013-11-22-Leundaetal2008.pdf</a>                                                                                                                                                                                                                                                                                                                                                                                     | Medium     |
| 19                                             | 4.06 | Is the taxon likely to exert adverse impacts on ecosystem services in the RA area?                                                                                      | Yes      | "In view of the continued reports of non-native range expansions by the species in Europe, it is highly likely that the distribution and impact to native communities and ecosystem services of the species will increase."                                                                                                                                                                                                                                                                                                                                                                                                                              | Medium     |
| 20                                             | 4.07 | Is it likely that the taxon will host, and/or act as a vector for, recognised pests and infectious agents that are endemic in the RA                                    | No       | No information available.                                                                                                                                                                                                                                                                                                                                                                                                                                                                                                                                                                                                                                | Low        |



|                                 |      |                                                                                                                                                                              |                |                                                                                                                                                                                                                                                                                                                                                                                                                                                                                                                                                          |           |
|---------------------------------|------|------------------------------------------------------------------------------------------------------------------------------------------------------------------------------|----------------|----------------------------------------------------------------------------------------------------------------------------------------------------------------------------------------------------------------------------------------------------------------------------------------------------------------------------------------------------------------------------------------------------------------------------------------------------------------------------------------------------------------------------------------------------------|-----------|
| 21                              | 4.08 | Is it likely that the taxon will host, and/or act as a vector for, recognised pests and infectious agents that are absent from (novel to) the RA area?                       | Yes            | It is likely. Even though, not studied, the risk is still there.                                                                                                                                                                                                                                                                                                                                                                                                                                                                                         | Medium    |
| 22                              | 4.09 | Is it likely that the taxon will achieve a body size that will make it more likely to be released from captivity?                                                            | Yes            | Yes: Max length : 66.0 cm TL male/unsexed; common length : 26.6 cm TL male/unsexed; max. published weight: 3.6 kg. See: <a href="https://fishbase.mnhn.fr/summary/Ameiurus-melas.html">https://fishbase.mnhn.fr/summary/Ameiurus-melas.html</a>                                                                                                                                                                                                                                                                                                          | Very high |
| 23                              | 4.10 | Is the taxon capable of sustaining itself in a range of water velocity conditions (e.g. versatile in habitat use)?                                                           | No             | Inhabits pools, backwaters, and sluggish current over soft substrates in creeks and small to large rivers; impoundments, oxbows, and ponds. See:                                                                                                                                                                                                                                                                                                                                                                                                         | Medium    |
| 24                              | 4.11 | Is it likely that the taxon's mode of existence (e.g. excretion of by-products) or behaviours (e.g. feeding) will reduce habitat quality for native taxa?                    | Yes            | "The black bullhead is a benthivorous fish inhabiting standing waters with soft bottom substrata (Keith & Allardi, 2001), and its activity is known to generate turbidity (Braig & Johnson, 2003). " <a href="http://brosse.sebastien.free.fr/2008_Kreutzenberger%20et%20alJ%20Fish%20Biol.pdf">http://brosse.sebastien.free.fr/2008_Kreutzenberger%20et%20alJ%20Fish%20Biol.pdf</a>                                                                                                                                                                     | Very high |
| 25                              | 4.12 | Is the taxon likely to maintain a viable population even when present in low densities (or persisting in adverse conditions by way of a dormant form)?                       | Yes            | Yes. It is highly possible since their mating behaviour, which includes building the nest, guarding and airing their eggs.                                                                                                                                                                                                                                                                                                                                                                                                                               | High      |
| <b>5. Resource exploitation</b> |      |                                                                                                                                                                              |                |                                                                                                                                                                                                                                                                                                                                                                                                                                                                                                                                                          |           |
| 26                              | 5.01 | Is the taxon likely to consume threatened or protected native taxa in the RA area?                                                                                           | Yes            | Leunda et al 2008                                                                                                                                                                                                                                                                                                                                                                                                                                                                                                                                        | High      |
| 27                              | 5.02 | Is the taxon likely to sequester food resources (including nutrients) to the detriment of native taxa in the RA area?                                                        | Yes            | " Taking into account black bullhead's voracity and aggressive behaviour, the diet similarity might lead to an unfavourable competition for the same food resources, subsequently, displacing native fishes to suboptimal food resources. Some effects of exotic ichthyophagous fishes, such as on competition and predation, are habitat-dependent and might be favoured by habitat degradation." <a href="https://www.ucm.es/data/cont/docs/568-2013-11-22-Leundaetal2008.pdf">https://www.ucm.es/data/cont/docs/568-2013-11-22-Leundaetal2008.pdf</a> | Very high |
| <b>6. Reproduction</b>          |      |                                                                                                                                                                              |                |                                                                                                                                                                                                                                                                                                                                                                                                                                                                                                                                                          |           |
| 28                              | 6.01 | Is the taxon likely to exhibit parental care and/or to reduce age-at-maturity in response to environmental conditions?                                                       | Yes            | Both males and females guard and fan the nests                                                                                                                                                                                                                                                                                                                                                                                                                                                                                                           | Very high |
| 29                              | 6.02 | Is the taxon likely to produce viable gametes or propagules (in the RA area)?                                                                                                | No             | No info available information. However, we can assume that the probability of this is low due to the climatic conditions in RA.                                                                                                                                                                                                                                                                                                                                                                                                                          | Low       |
| 30                              | 6.03 | Is the taxon likely to hybridise naturally with native taxa?                                                                                                                 | No             | No. It is not documented and is unlikely.                                                                                                                                                                                                                                                                                                                                                                                                                                                                                                                | Very high |
| 31                              | 6.04 | Is the taxon likely to be hermaphroditic or to display asexual reproduction?                                                                                                 | No             | No. Their spawning habits are expressed on the following link: <a href="https://fishbase.mnhn.fr/summary/Ameiurus-melas.html">https://fishbase.mnhn.fr/summary/Ameiurus-melas.html</a>                                                                                                                                                                                                                                                                                                                                                                   | Very high |
| 32                              | 6.05 | Is the taxon dependent on the presence of another taxon (or specific habitat features) to complete its life cycle?                                                           | No             | No. Can complete their life cycle without presence of another taxon.                                                                                                                                                                                                                                                                                                                                                                                                                                                                                     | Very high |
| 33                              | 6.06 | Is the taxon known (or likely) to produce a large number of propagules or offspring within a short time span (e.g. < 1 year)?                                                | Yes            | Females produce between 2,000 and 3,800 eggs.                                                                                                                                                                                                                                                                                                                                                                                                                                                                                                            | Medium    |
| 34                              | 6.07 | How many time units (days, months, years) does the taxon require to reach the age-at-first-reproduction?                                                                     | 2              | 1-3 years                                                                                                                                                                                                                                                                                                                                                                                                                                                                                                                                                | Very high |
| <b>7. Dispersal mechanisms</b>  |      |                                                                                                                                                                              |                |                                                                                                                                                                                                                                                                                                                                                                                                                                                                                                                                                          |           |
| 35                              | 7.01 | How many potential internal vectors/pathways could the taxon use to disperse within the RA area (with suitable)                                                              | One            | Aquaculture                                                                                                                                                                                                                                                                                                                                                                                                                                                                                                                                              | Very high |
| 36                              | 7.02 | Will any of these vectors/pathways bring the taxon in close proximity to one or more protected areas (e.g. MCZ, MPA, SSSI)?                                                  | Yes            | it is possible, since the aquaculture and recreational fisheries is very popular in the area, and stocking of non-native species is not well monitored.                                                                                                                                                                                                                                                                                                                                                                                                  | Low       |
| 37                              | 7.03 | Does the taxon have a means of actively attaching itself to hard substrata (e.g. ship hulls, pilings, buoys) such that it enhances the likelihood of dispersal?              | No             | No. Does not attach itself to hard substrata, this species does not have morphological traits that will allow them to do so.                                                                                                                                                                                                                                                                                                                                                                                                                             | Very high |
| 38                              | 7.04 | Is natural dispersal of the taxon likely to occur as eggs (for animals) or as propagules (for plants: seeds, spores) in the RA area?                                         | No             | No. As far as we know this fish has not brought in the area as inseminated eggs. So it is not likely.                                                                                                                                                                                                                                                                                                                                                                                                                                                    | Very high |
| 39                              | 7.05 | Is natural dispersal of the taxon likely to occur as larvae/juveniles (for animals) or as fragments/seedlings (for plants) in the RA area?                                   | Yes            | Is not documented but I assume it is possible.                                                                                                                                                                                                                                                                                                                                                                                                                                                                                                           | High      |
| 40                              | 7.06 | Are older life stages of the taxon likely to migrate in the RA area for reproduction?                                                                                        | No             | does not migrate                                                                                                                                                                                                                                                                                                                                                                                                                                                                                                                                         | Very high |
| 41                              | 7.07 | Are propagules or eggs of the taxon likely to be dispersed in the RA area by other animals?                                                                                  | No             | No. This type of dispersal is less likely.                                                                                                                                                                                                                                                                                                                                                                                                                                                                                                               | Very high |
| 42                              | 7.08 | Is dispersal of the taxon along any of the vectors/pathways mentioned in the previous seven questions (35-41; i.e. both unintentional or intentional) likely to be           | Not applicable | This species is not yet recorded so this question does not apply                                                                                                                                                                                                                                                                                                                                                                                                                                                                                         | Very high |
| 43                              | 7.09 | Is dispersal of the taxon density dependent?                                                                                                                                 | No             | no info                                                                                                                                                                                                                                                                                                                                                                                                                                                                                                                                                  | Low       |
| <b>8. Tolerance attributes</b>  |      |                                                                                                                                                                              |                |                                                                                                                                                                                                                                                                                                                                                                                                                                                                                                                                                          |           |
| 44                              | 8.01 | Is the taxon able to withstand being out of water for extended periods (e.g. minimum of one or more hours) at some stage of its life cycle?                                  | No             | No. It is not known.                                                                                                                                                                                                                                                                                                                                                                                                                                                                                                                                     | Very high |
| 45                              | 8.02 | Is the taxon tolerant of a wide range of water quality conditions relevant to that taxon? [In the Justification field, indicate the relevant water quality variable(s) being | Yes            | tolerates a wide range of pH and even hypoxia                                                                                                                                                                                                                                                                                                                                                                                                                                                                                                            | Very high |

|                          |      |                                                                                                                                                              |          |                                                                                                                                                                                                                                                      |           |
|--------------------------|------|--------------------------------------------------------------------------------------------------------------------------------------------------------------|----------|------------------------------------------------------------------------------------------------------------------------------------------------------------------------------------------------------------------------------------------------------|-----------|
| 46                       | 8.03 | Can the taxon be controlled or eradicated in the wild with chemical, biological, or other agents/means?                                                      | Yes      | yes but it is costly and sometimes ineffective                                                                                                                                                                                                       | Low       |
| 47                       | 8.04 | Is the taxon likely to tolerate or benefit from environmental/human disturbance?                                                                             | Yes      | yes very tolerant to pollution (Leunda et al 2008)                                                                                                                                                                                                   | Very high |
| 48                       | 8.05 | Is the taxon able to tolerate salinity levels that are higher or lower than those found in its usual environment?                                            | No       | No information available                                                                                                                                                                                                                             | Low       |
| 49                       | 8.06 | Are there effective natural enemies (predators) of the taxon present in the RA                                                                               | No       | No effective natural enemies present in RA.                                                                                                                                                                                                          | Very high |
| <b>C. Climate change</b> |      |                                                                                                                                                              |          |                                                                                                                                                                                                                                                      |           |
| <b>9. Climate change</b> |      |                                                                                                                                                              |          |                                                                                                                                                                                                                                                      |           |
| 50                       | 9.01 | Under the predicted future climatic conditions, are the risks of entry into the RA area posed by the taxon likely to increase, decrease or not change?       | Increase | It was hypothesized that climate change might alert the mechanisms of transportation and introduction of non-native species. Commercial and recreational activities will increase, that itself increases the propagule pressure levels of non-native | Very high |
| 51                       | 9.02 | Under the predicted future climatic conditions, are the risks of establishment posed by the taxon likely to increase, decrease or not change?                | Increase | it is a warmwater fish. with increasing temperatures, risks of establishment increases                                                                                                                                                               | Very high |
| 52                       | 9.03 | Under the predicted future climatic conditions, are the risks of dispersal within the RA area posed by the taxon likely to increase, decrease or not change? | Increase | With increased temperatures It can distribute to higher altitudes as well                                                                                                                                                                            | High      |
| 53                       | 9.04 | Under the predicted future climatic conditions, what is the likely magnitude of future potential impacts on biodiversity and/or ecological integrity/status? | Higher   | They will be widely distributed and since their abundance the impacts on biodiversity will be higher                                                                                                                                                 | Very high |
| 54                       | 9.05 | Under the predicted future climatic conditions, what is the likely magnitude of future potential impacts on ecosystem structure and/or function?             | Higher   | Magnitude of potential impacts on ecosystem structure and function seems higher                                                                                                                                                                      | High      |
| 55                       | 9.06 | Under the predicted future climatic conditions, what is the likely magnitude of future potential impacts on ecosystem services/socio-economic factors?       | Higher   | Magnitude of potential impacts on ecosystem services-socio-economic factors seems higher                                                                                                                                                             | Very high |

| Statistics                                     |      |
|------------------------------------------------|------|
| Scores                                         |      |
| BRA                                            | 35.0 |
| BRA Outcome                                    | -    |
| BRA+CCA                                        | 47.0 |
| BRA+CCA Outcome                                | -    |
| Score partition                                |      |
| A. Biogeography/Historical                     | 19.0 |
| 1. Domestication/Cultivation                   | 4.0  |
| 2. Climate, distribution and introduction risk | 1.0  |
| 3. Invasive elsewhere                          | 14.0 |
| B. Biology/Ecology                             | 16.0 |
| 4. Undesirable (or persistence) traits         | 8.0  |
| 5. Resource exploitation                       | 7.0  |
| 6. Reproduction                                | 1.0  |
| 7. Dispersal mechanisms                        | -2.0 |
| 8. Tolerance attributes                        | 2.0  |
| C. Climate change                              | 12.0 |
| 9. Climate change                              | 12.0 |
| Answered Questions                             |      |
| Total                                          | 55   |
| A. Biogeography/Historical                     | 13   |
| 1. Domestication/Cultivation                   | 3    |
| 2. Climate, distribution and introduction risk | 5    |
| 3. Invasive elsewhere                          | 5    |
| B. Biology/Ecology                             | 36   |
| 4. Undesirable (or persistence) traits         | 12   |
| 5. Resource exploitation                       | 2    |
| 6. Reproduction                                | 7    |
| 7. Dispersal mechanisms                        | 9    |
| 8. Tolerance attributes                        | 6    |
| C. Climate change                              | 6    |
| 9. Climate change                              | 6    |
| Sectors affected                               |      |
| Commercial                                     | 14   |
| Environmental                                  | 17   |
| Species or population nuisance traits          | 18   |

| Thresholds |      |
|------------|------|
| BRA        | -    |
| BRA+CCA    | -    |
| Confidence |      |
| BRA+CCA    | 0.81 |
| BRA        | 0.80 |
| CCA        | 0.92 |

| Date and Time       |  |
|---------------------|--|
| 20/05/2022 15:33:04 |  |

AS-ISK v2

| Taxon and Assessor details         |                                                                                  |
|------------------------------------|----------------------------------------------------------------------------------|
| Category                           | Fishes and Lampreys (freshwater)                                                 |
| Taxon name                         | <i>Anguilla anguilla</i>                                                         |
| Common name                        | European eel                                                                     |
| Assessor                           | Bella Japoshvili                                                                 |
| Risk screening context             |                                                                                  |
| Reason and socio-economic benefits | The first NNS risk screening project for South-Caucasian fishes.                 |
| Risk assessment area               | South Caucasus                                                                   |
| Taxonomy                           | Animalia/Chordata/Actinopterygii/Anguilliformes/Anguillidae/Anguilla/A. anguilla |
| Native range                       | Europe                                                                           |
| Introduced range                   | Caspian Sea basin                                                                |
| URL                                |                                                                                  |

|                                                |      |                                                                                                                                                                         | Response | Justification (references and/or other information)                                                                                                                                                                                                                                                                                                    | Confidence |
|------------------------------------------------|------|-------------------------------------------------------------------------------------------------------------------------------------------------------------------------|----------|--------------------------------------------------------------------------------------------------------------------------------------------------------------------------------------------------------------------------------------------------------------------------------------------------------------------------------------------------------|------------|
| A. Biogeography/Historical                     |      |                                                                                                                                                                         |          |                                                                                                                                                                                                                                                                                                                                                        |            |
| 1. Domestication/Cultivation                   |      |                                                                                                                                                                         |          |                                                                                                                                                                                                                                                                                                                                                        |            |
| 1                                              | 1.01 | Has the taxon been the subject of domestication (or cultivation) for at least 20 generations?                                                                           | Yes      | Gousset, B. (1990). European eel ( <i>Anguilla anguilla</i> L.) farming technologies in Europe and in Japan: Application of a comparative analysis. <i>Aquaculture</i> , 87(3-4), 209-235.                                                                                                                                                             | Very high  |
| 2                                              | 1.02 | Is the taxon harvested in the wild and likely to be sold or used in its live form?                                                                                      | Yes      | The individuals are caught in the wild and then threatred in captivity to artificially induce the maturation (Mordenti, O., Di Biase, A., Bastone, G., Sirri, R., Zaccaroni, A., & Parmeggiani, A. (2013). Controlled reproduction in the wild European eel ( <i>Anguilla anguilla</i> ): two populations compared. <i>Aquaculture international</i> , | High       |
| 3                                              | 1.03 | Does the taxon have invasive races, varieties, sub-taxa or congeners?                                                                                                   | No       | Not known                                                                                                                                                                                                                                                                                                                                              | High       |
| 2. Climate, distribution and introduction risk |      |                                                                                                                                                                         |          |                                                                                                                                                                                                                                                                                                                                                        |            |
| 4                                              | 2.01 | How similar are the climatic conditions of the Risk Assessment (RA) area and the taxon's native range?                                                                  | High     | Climmatch algorithm - very similar                                                                                                                                                                                                                                                                                                                     | High       |
| 5                                              | 2.02 | What is the quality of the climate matching data?                                                                                                                       | Medium   | No exhaustive data distribution data is available                                                                                                                                                                                                                                                                                                      | High       |
| 6                                              | 2.03 | Is the taxon already present outside of captivity in the RA area?                                                                                                       | Yes      | Kuljanishvili et al., 2021                                                                                                                                                                                                                                                                                                                             | Medium     |
| 7                                              | 2.04 | How many potential vectors could the taxon use to enter in the RA area?                                                                                                 | >1       | It can be translocated by human dirctly or migrate through the chennelled system                                                                                                                                                                                                                                                                       | Very high  |
| 8                                              | 2.05 | Is the taxon currently found in close proximity to, and likely to enter into, the RA area in the near future (e.g. unintentional and intentional introductions)?        | No       | No evidence of viable (established) populations in RA                                                                                                                                                                                                                                                                                                  | Medium     |
| 3. Invasive elsewhere                          |      |                                                                                                                                                                         |          |                                                                                                                                                                                                                                                                                                                                                        |            |
| 9                                              | 3.01 | Has the taxon become naturalised (established viable populations) outside its                                                                                           | No       | No such an evidence exists                                                                                                                                                                                                                                                                                                                             | Medium     |
| 10                                             | 3.02 | In the taxon's introduced range, are there known adverse impacts to wild stocks or commercial taxa?                                                                     | Yes      | Evans, D. W., & Matthews, M. A. (1999). <i>Anguillicola crassus</i> (Nematoda, Dracunculoidea); first documented record of this swimbladder parasite of eels in Ireland. <i>Journal of Fish Biology</i> , 55(3), 665-668.                                                                                                                              | High       |
| 11                                             | 3.03 | In the taxon's introduced range, are there known adverse impacts to aquaculture?                                                                                        | No       | No such an evidence                                                                                                                                                                                                                                                                                                                                    | High       |
| 12                                             | 3.04 | In the taxon's introduced range, are there known adverse impacts to ecosystem                                                                                           | Yes      | Expected but not documented evidence                                                                                                                                                                                                                                                                                                                   | Low        |
| 13                                             | 3.05 | In the taxon's introduced range, are there known adverse socio-economic impacts?                                                                                        | No       | No such an evidence                                                                                                                                                                                                                                                                                                                                    | Medium     |
| B. Biology/Ecology                             |      |                                                                                                                                                                         |          |                                                                                                                                                                                                                                                                                                                                                        |            |
| 4. Undesirable (or persistence) traits         |      |                                                                                                                                                                         |          |                                                                                                                                                                                                                                                                                                                                                        |            |
| 14                                             | 4.01 | Is it likely that the taxon will be poisonous or pose other risks to human health?                                                                                      | No       | No such an evidence exists                                                                                                                                                                                                                                                                                                                             | High       |
| 15                                             | 4.02 | Is it likely that the taxon will smother one or more native taxa (that are not threatened or protected)?                                                                | No       | No such an evidence exist                                                                                                                                                                                                                                                                                                                              | High       |
| 16                                             | 4.03 | Are there any threatened or protected taxa that the non-native taxon would parasitise in the RA area?                                                                   | No       | Species is not prasite                                                                                                                                                                                                                                                                                                                                 | Very high  |
| 17                                             | 4.04 | Is the taxon adaptable in terms of climatic and other environmental conditions, thus enhancing its potential persistence if it has invaded or could invade the RA area? | No       | European eel need to migrate into the ocean for spawning. There is no evidence that it can adapt the migration through the Black-Caspian sea channales or spawn locally.                                                                                                                                                                               | Medium     |
| 18                                             | 4.05 | Is the taxon likely to disrupt food-web structure/function in aquatic ecosystems if it has invaded or is likely to invade the RA                                        | No       | No such an evidence                                                                                                                                                                                                                                                                                                                                    | Medium     |
| 19                                             | 4.06 | Is the taxon likely to exert adverse impacts on ecosystem services in the RA area?                                                                                      | No       | No any reason and not any evdence exists                                                                                                                                                                                                                                                                                                               | High       |
| 20                                             | 4.07 | Is it likely that the taxon will host, and/or act as a vector for, recognised pests and infectious agents that are endemic in the RA                                    | No       | No such potential parasite or pests is known from RA area                                                                                                                                                                                                                                                                                              | High       |
| 21                                             | 4.08 | Is it likely that the taxon will host, and/or act as a vector for, recognised pests and infectious agents that are absent from (novel to) the RA area?                  | Yes      | There are some eel-associated parasites/deseaze that is currently absent from the RA (Tesch, F. W., & Bartsch, P. (2003). The eel (p. 408). Oxford: Blackwell Science)                                                                                                                                                                                 | Medium     |
| 22                                             | 4.09 | Is it likely that the taxon will achieve a body size that will make it more likely to be released from captivity?                                                       | Yes      | Tesch, F. W., & Bartsch, P. (2003). The eel (p. 408). Oxford: Blackwell Science                                                                                                                                                                                                                                                                        | Medium     |

|                                 |      |                                                                                                                                                                              |     |                                                                                                                                                                   |           |
|---------------------------------|------|------------------------------------------------------------------------------------------------------------------------------------------------------------------------------|-----|-------------------------------------------------------------------------------------------------------------------------------------------------------------------|-----------|
| 23                              | 4.10 | Is the taxon capable of sustaining itself in a range of water velocity conditions (e.g. versatile in habitat use)?                                                           | Yes | Eel is living in wide range of water velocity (Tesch, F. W., & Bartsch, P. (2003). The eel (p. 408). Oxford: Blackwell Science)                                   | High      |
| 24                              | 4.11 | Is it likely that the taxon's mode of existence (e.g. excretion of by-products) or behaviours (e.g. feeding) will reduce habitat quality for native taxa?                    | No  | No such an evidence                                                                                                                                               | High      |
| 25                              | 4.12 | Is the taxon likely to maintain a viable population even when present in low densities (or persisting in adverse conditions by way of a dormant form)?                       | No  | No such information available                                                                                                                                     | Low       |
| <b>5. Resource exploitation</b> |      |                                                                                                                                                                              |     |                                                                                                                                                                   |           |
| 26                              | 5.01 | Is the taxon likely to consume threatened or protected native taxa in the RA area?                                                                                           | Yes | Eel is predator and within the RA area there are a number of threatend species including fishes and invertebrates                                                 | High      |
| 27                              | 5.02 | Is the taxon likely to sequester food resources (including nutrients) to the detriment of native taxa in the RA area?                                                        | No  | No such an evidence. Although it is competing food with Conger conger in the native area, no similar species is known from the RA                                 | Medium    |
| <b>6. Reproduction</b>          |      |                                                                                                                                                                              |     |                                                                                                                                                                   |           |
| 28                              | 6.01 | Is the taxon likely to exhibit parental care and/or to reduce age-at-maturity in response to environmental conditions?                                                       | No  | Deelder, C. 1970. Synopsis of biological data of the eel <i>Anguilla anguilla</i> (Linnaeus, 1758). FAO Fish. Synop., 80: 68.                                     | Very high |
| 29                              | 6.02 | Is the taxon likely to produce viable gametes or propagules (in the RA area)?                                                                                                | No  | It needs to migrate to the atlantic for the spawning Tesch, F. W., & Bartsch, P. (2003). The eel (p. 408). Oxford: Blackwell Science.                             | Very high |
| 30                              | 6.03 | Is the taxon likely to hybridise naturally with native taxa?                                                                                                                 | No  | No other taxa realted to Eel is known from RA area                                                                                                                | Very high |
| 31                              | 6.04 | Is the taxon likely to be hermaphroditic or to display asexual reproduction?                                                                                                 | Yes | Tesch, F. W., & Bartsch, P. (2003). The eel (p. 408). Oxford: Blackwell Science.                                                                                  | Very high |
| 32                              | 6.05 | Is the taxon dependent on the presence of another taxon (or specific habitat features) to complete its life cycle?                                                           | Yes | There must be a pathway for eel to migrate to the atlantic                                                                                                        | Very high |
| 33                              | 6.06 | Is the taxon known (or likely) to produce a large number of propagules or offspring within a short time span (e.g. < 1 year)?                                                | No  | Tesch, F. W., & Bartsch, P. (2003). The eel (p. 408). Oxford: Blackwell Science.                                                                                  | Very high |
| 34                              | 6.07 | How many time units (days, months, years) does the taxon require to reach the age-at-first-reproduction?                                                                     | >10 | Tesch, F. W., & Bartsch, P. (2003). The eel (p. 408). Oxford: Blackwell Science.                                                                                  | Very high |
| <b>7. Dispersal mechanisms</b>  |      |                                                                                                                                                                              |     |                                                                                                                                                                   |           |
| 35                              | 7.01 | How many potential internal vectors/pathways could the taxon use to disperse within the RA area (with suitable protected areas (e.g. MCZ, MPA, SSSI)?                        | >1  | It can spread by a human an also it can reach the Caspian sea basin through the Black-Caspian sea channel system                                                  | Medium    |
| 36                              | 7.02 | Will any of these vectors/pathways bring the taxon in close proximity to one or more protected areas (e.g. MCZ, MPA, SSSI)?                                                  | No  | In the areas where Eel could be establish no such PA exists                                                                                                       | Medium    |
| 37                              | 7.03 | Does the taxon have a means of actively attaching itself to hard substrata (e.g. ship hulls, pilings, buoys) such that it enhances the likelihood of dispersal?              | No  | Tesch, F. W., & Bartsch, P. (2003). The eel (p. 408). Oxford: Blackwell Science.                                                                                  | High      |
| 38                              | 7.04 | Is natural dispersal of the taxon likely to occur as eggs (for animals) or as propagules (for plants: seeds, spores) in the RA area?                                         | No  | Based on the life history of Eel, this is impossible                                                                                                              | Very high |
| 39                              | 7.05 | Is natural dispersal of the taxon likely to occur as larvae/juveniles (for animals) or as fragments/seedlings (for plants) in the RA area?                                   | No  | No documented evidence exists, nor expected                                                                                                                       | High      |
| 40                              | 7.06 | Are older life stages of the taxon likely to migrate in the RA area for reproduction?                                                                                        | No  | Tesch, F. W., & Bartsch, P. (2003). The eel (p. 408). Oxford: Blackwell Science.                                                                                  | Very high |
| 41                              | 7.07 | Are propagules or eggs of the taxon likely to be dispersed in the RA area by other animals?                                                                                  | No  | No evidence of this kind of dispersal                                                                                                                             | High      |
| 42                              | 7.08 | Is dispersal of the taxon along any of the vectors/pathways mentioned in the previous seven questions (35-41; i.e. both unintentional or intentional) likely to be           | Yes | Can be due to a human mediated release of new areas                                                                                                               | High      |
| 43                              | 7.09 | Is dispersal of the taxon density dependent?                                                                                                                                 | No  | No such an evidence                                                                                                                                               | Low       |
| <b>8. Tolerance attributes</b>  |      |                                                                                                                                                                              |     |                                                                                                                                                                   |           |
| 44                              | 8.01 | Is the taxon able to withstand being out of water for extended periods (e.g. minimum of one or more hours) at some stage of its life cycle?                                  | No  | Not an evidence that Eel can withstand conditions out of water                                                                                                    | High      |
| 45                              | 8.02 | Is the taxon tolerant of a wide range of water quality conditions relevant to that taxon? [In the Justification field, indicate the relevant water quality variable(s) being | No  | No such an evidence exists                                                                                                                                        | Medium    |
| 46                              | 8.03 | Can the taxon be controlled or eradicated in the wild with chemical, biological, or other agents/means?                                                                      | No  | No such practice exists                                                                                                                                           | High      |
| 47                              | 8.04 | Is the taxon likely to tolerate or benefit from environmental/human disturbance?                                                                                             | No  | Not expected. Usually due to the species complex life cycle disturbance would hinder its distribution                                                             | Medium    |
| 48                              | 8.05 | Is the taxon able to tolerate salinity levels that are higher or lower than those found in its usual environment?                                                            | No  | The species is tollerant with wide range of water salinity represented its native range. However no reason to think about the even larger range of salinity level | Medium    |
| 49                              | 8.06 | Are there effective natural enemies (predators) of the taxon present in the RA                                                                                               | No  | No such an information                                                                                                                                            | High      |
| <b>C. Climate change</b>        |      |                                                                                                                                                                              |     |                                                                                                                                                                   |           |
| <b>9. Climate change</b>        |      |                                                                                                                                                                              |     |                                                                                                                                                                   |           |

|    |      |                                                                                                                                                              |           |                                                                                         |        |
|----|------|--------------------------------------------------------------------------------------------------------------------------------------------------------------|-----------|-----------------------------------------------------------------------------------------|--------|
| 50 | 9.01 | Under the predicted future climatic conditions, are the risks of entry into the RA area posed by the taxon likely to increase, decrease or not change?       | No change | After climmatch modeling no significant change is expected                              | Medium |
| 51 | 9.02 | Under the predicted future climatic conditions, are the risks of establishment posed by the taxon likely to increase, decrease or not change?                | No change | No significant change is expected in the establishment risk after climmatch scenario    | Medium |
| 52 | 9.03 | Under the predicted future climatic conditions, are the risks of dispersal within the RA area posed by the taxon likely to increase, decrease or not change? | No change | Based on personal judgment, expected climate change should not affect the eel dispersal | High   |
| 53 | 9.04 | Under the predicted future climatic conditions, what is the likely magnitude of future potential impacts on biodiversity and/or ecological integrity/status? | No change | No change is expected                                                                   | Medium |
| 54 | 9.05 | Under the predicted future climatic conditions, what is the likely magnitude of future potential impacts on ecosystem structure and/or function?             | No change | No change is expected                                                                   | Medium |
| 55 | 9.06 | Under the predicted future climatic conditions, what is the likely magnitude of future potential impacts on ecosystem services/socio-economic factors?       | No change | No climate related change is expected                                                   | Medium |

| Statistics                                     |             |
|------------------------------------------------|-------------|
| Scores                                         |             |
| <b>BRA</b>                                     | <b>12.0</b> |
| <b>BRA Outcome</b>                             | <b>-</b>    |
| <b>BRA+CCA</b>                                 | <b>12.0</b> |
| <b>BRA+CCA Outcome</b>                         | <b>-</b>    |
| Score partition                                |             |
| <b>A. Biogeography/Historical</b>              | <b>12.0</b> |
| 1. Domestication/Cultivation                   | 2.0         |
| 2. Climate, distribution and introduction risk | 2.0         |
| 3. Invasive elsewhere                          | 8.0         |
| <b>B. Biology/Ecology</b>                      | <b>0.0</b>  |
| 4. Undesirable (or persistence) traits         | 2.0         |
| 5. Resource exploitation                       | 5.0         |
| 6. Reproduction                                | -2.0        |
| 7. Dispersal mechanisms                        | -3.0        |
| 8. Tolerance attributes                        | -2.0        |
| <b>C. Climate change</b>                       | <b>0.0</b>  |
| 9. Climate change                              | 0.0         |
| Answered Questions                             |             |
| <b>Total</b>                                   | <b>55</b>   |
| <b>A. Biogeography/Historical</b>              | <b>13</b>   |
| 1. Domestication/Cultivation                   | 3           |
| 2. Climate, distribution and introduction risk | 5           |
| 3. Invasive elsewhere                          | 5           |
| <b>B. Biology/Ecology</b>                      | <b>36</b>   |
| 4. Undesirable (or persistence) traits         | 12          |
| 5. Resource exploitation                       | 2           |
| 6. Reproduction                                | 7           |
| 7. Dispersal mechanisms                        | 9           |
| 8. Tolerance attributes                        | 6           |
| <b>C. Climate change</b>                       | <b>6</b>    |
| 9. Climate change                              | 6           |
| Sectors affected                               |             |
| <b>Commercial</b>                              | <b>11</b>   |
| <b>Environmental</b>                           | <b>9</b>    |
| <b>Species or population nuisance traits</b>   | <b>-4</b>   |

| Thresholds     |             |
|----------------|-------------|
| <b>BRA</b>     | <b>-</b>    |
| <b>BRA+CCA</b> | <b>-</b>    |
| Confidence     |             |
| <b>BRA+CCA</b> | <b>0.69</b> |
| <b>BRA</b>     | <b>0.71</b> |
| <b>CCA</b>     | <b>0.54</b> |

| Date and Time       |
|---------------------|
| 04/05/2022 12:02:06 |

AS-ISK v2

| Taxon and Assessor details         |                                                                                                                             |
|------------------------------------|-----------------------------------------------------------------------------------------------------------------------------|
| Category                           | Fishes and Lampreys (freshwater)                                                                                            |
| Taxon name                         | <i>Anguilla anguilla</i>                                                                                                    |
| Common name                        | European eel                                                                                                                |
| Assessor                           | Giorgi Epitashvili                                                                                                          |
| Risk screening context             |                                                                                                                             |
| Reason and socio-economic benefits | <i>Anguilla anguilla</i> is a snake-like, catadromous fish. Eels have been important sources of food. At                    |
| Risk assessment area               | South Caucasus                                                                                                              |
| Taxonomy                           | Family - Anguillidae                                                                                                        |
| Native range                       | Atlantic Ocean: Atlantic coast from Scandinavia to Morocco; Baltic, Black and Mediterranean Seas;                           |
| Introduced range                   | Continuous introductions to Asia and South and Central America                                                              |
| URL                                | <a href="https://www.fishbase.se/summary/Anguilla-anguilla.html">https://www.fishbase.se/summary/Anguilla-anguilla.html</a> |

|                                                |      |                                                                                                                                                                         | Response | Justification (references and/or other information)                                                                                                                                                                                                                                            | Confidence |
|------------------------------------------------|------|-------------------------------------------------------------------------------------------------------------------------------------------------------------------------|----------|------------------------------------------------------------------------------------------------------------------------------------------------------------------------------------------------------------------------------------------------------------------------------------------------|------------|
| A. Biogeography/Historical                     |      |                                                                                                                                                                         |          |                                                                                                                                                                                                                                                                                                |            |
| 1. Domestication/Cultivation                   |      |                                                                                                                                                                         |          |                                                                                                                                                                                                                                                                                                |            |
| 1                                              | 1.01 | Has the taxon been the subject of domestication (or cultivation) for at least 20 generations?                                                                           | Yes      | Currently, the top three producing countries of farmed European eels are the Netherlands, Italy, and Denmark. Spain, Greece, Sweden and Germany are also centres of eel farming activity and smaller quantities are produced in several other European and North African countries (FAO 2021). | High       |
| 2                                              | 1.02 | Is the taxon harvested in the wild and likely to be sold or used in its live form?                                                                                      | Yes      | Production of eels is based on wild catches of glass eels (elvers) used for further ongrowing (FAO 2021).                                                                                                                                                                                      | High       |
| 3                                              | 1.03 | Does the taxon have invasive races, varieties, sub-taxa or congeners?                                                                                                   | No       | There is no evidence of the invasiveness of this species.                                                                                                                                                                                                                                      | High       |
| 2. Climate, distribution and introduction risk |      |                                                                                                                                                                         |          |                                                                                                                                                                                                                                                                                                |            |
| 4                                              | 2.01 | How similar are the climatic conditions of the Risk Assessment (RA) area and the taxon's native range?                                                                  | High     | <i>Anguilla anguilla</i> is naturally distributed in the SC region and enters in some rivers of Georgian Black Sea (Ninua et al. 2013; Kuljanishvili et al. 2020). Therefore, climatic conditions are                                                                                          | Very high  |
| 5                                              | 2.02 | What is the quality of the climate matching data?                                                                                                                       | High     | <i>Anguilla anguilla</i> is naturally distributed in the SC region and enters in some rivers of Georgian Black Sea (Ninua et al. 2013; Kuljanishvili et al. 2020). Therefore, climatic conditions are                                                                                          | Very high  |
| 6                                              | 2.03 | Is the taxon already present outside of captivity in the RA area?                                                                                                       | Yes      | <i>Anguilla anguilla</i> is naturally distributed in the SC region and enters in some rivers of Georgian Black Sea (Ninua et al. 2013; Kuljanishvili et al. 2020).                                                                                                                             | Very high  |
| 7                                              | 2.04 | How many potential vectors could the taxon use to enter in the RA area?                                                                                                 | >1       | <i>A. anguilla</i> is naturally distributed in the SC region and enters in some rivers of Georgian Black Sea (Ninua et al. 2013; Kuljanishvili et al. 2020). This species can also be enter in the region through aquaculture.                                                                 | Very high  |
| 8                                              | 2.05 | Is the taxon currently found in close proximity to, and likely to enter into, the RA area in the near future (e.g. unintentional and intentional introductions)?        | Yes      | <i>A. anguilla</i> is naturally distributed in the SC region and enters in some rivers of Georgian Black Sea (Ninua et al. 2013; Kuljanishvili et al. 2020).                                                                                                                                   | Very high  |
| 3. Invasive elsewhere                          |      |                                                                                                                                                                         |          |                                                                                                                                                                                                                                                                                                |            |
| 9                                              | 3.01 | Has the taxon become naturalised (established viable populations) outside its                                                                                           | No       | No such facts have been recorded                                                                                                                                                                                                                                                               | Medium     |
| 10                                             | 3.02 | In the taxon's introduced range, are there known adverse impacts to wild stocks or commercial taxa?                                                                     | No       | No such facts have been recorded                                                                                                                                                                                                                                                               | Medium     |
| 11                                             | 3.03 | In the taxon's introduced range, are there known adverse impacts to aquaculture?                                                                                        | No       | No such facts have been recorded                                                                                                                                                                                                                                                               | Medium     |
| 12                                             | 3.04 | In the taxon's introduced range, are there known adverse impacts to ecosystem                                                                                           | No       | No such facts have been recorded                                                                                                                                                                                                                                                               | Medium     |
| 13                                             | 3.05 | In the taxon's introduced range, are there known adverse socio-economic impacts?                                                                                        | No       | No such facts have been recorded                                                                                                                                                                                                                                                               | Medium     |
| B. Biology/Ecology                             |      |                                                                                                                                                                         |          |                                                                                                                                                                                                                                                                                                |            |
| 4. Undesirable (or persistence) traits         |      |                                                                                                                                                                         |          |                                                                                                                                                                                                                                                                                                |            |
| 14                                             | 4.01 | Is it likely that the taxon will be poisonous or pose other risks to human health?                                                                                      | No       | This species does not pose a threat to humans                                                                                                                                                                                                                                                  | Medium     |
| 15                                             | 4.02 | Is it likely that the taxon will smother one or more native taxa (that are not threatened or protected)?                                                                | No       | No such facts have been recorded                                                                                                                                                                                                                                                               | Medium     |
| 16                                             | 4.03 | Are there any threatened or protected taxa that the non-native taxon would parasitise in the RA area?                                                                   | Yes      | No such facts have been recorded                                                                                                                                                                                                                                                               | Medium     |
| 17                                             | 4.04 | Is the taxon adaptable in terms of climatic and other environmental conditions, thus enhancing its potential persistence if it has invaded or could invade the RA area? | Yes      | This species is naturally distributed in the SC region and climatic/environmental conditions are acceptable to it.                                                                                                                                                                             | Very high  |
| 18                                             | 4.05 | Is the taxon likely to disrupt food-web structure/function in aquatic ecosystems if it has invaded or is likely to invade the RA                                        | No       | <i>A. anguilla</i> is native to the SC region. At the same time this species has very small population and such a fact is not expected.                                                                                                                                                        | High       |
| 19                                             | 4.06 | Is the taxon likely to exert adverse impacts on ecosystem services in the RA area?                                                                                      | No       | <i>A. anguilla</i> is native to the SC region. At the same time this species has very small population and such a fact is not expected.                                                                                                                                                        | High       |
| 20                                             | 4.07 | Is it likely that the taxon will host, and/or act as a vector for, recognised pests and infectious agents that are endemic in the RA                                    | No       | No such fact has been observed.                                                                                                                                                                                                                                                                | Medium     |
| 21                                             | 4.08 | Is it likely that the taxon will host, and/or act as a vector for, recognised pests and infectious agents that are absent from (novel to) the RA area?                  | No       | No such fact has been observed.                                                                                                                                                                                                                                                                | Medium     |

|                                 |      |                                                                                                                                                                    |     |                                                                                                                                                                                                                                                                                                                                                                                                                                                                                                                                                                       |           |
|---------------------------------|------|--------------------------------------------------------------------------------------------------------------------------------------------------------------------|-----|-----------------------------------------------------------------------------------------------------------------------------------------------------------------------------------------------------------------------------------------------------------------------------------------------------------------------------------------------------------------------------------------------------------------------------------------------------------------------------------------------------------------------------------------------------------------------|-----------|
| 22                              | 4.09 | Is it likely that the taxon will achieve a body size that will make it more likely to be released from captivity?                                                  | Yes | Adult females can reach 133 cm in length with a total body weight of about 6 kg (Dekker et al., 1998) whereas males only reach 50 cm in length with a maximum weight of 0.3 kg. Eels are also extensively cultured in marine and brackish waters within a form of aquaculture known as valliculture. In these Mediterranean systems, mainly in Italy, in the north Adriatic, elvers of 15-35 g are stocked at the rate of 4-15 kg/ha. The elvers are mainly imported from France but also from Denmark. the Netherlands                                               | Very high |
| 23                              | 4.10 | Is the taxon capable of sustaining itself in a range of water velocity conditions (e.g. versatile in habitat use)?                                                 | Yes | Inhabits all types of benthic habitats from streams to shores of large rivers and lakes. Naturally found only in water bodies connected to the sea (Kottelat and Freyhof, 2007).                                                                                                                                                                                                                                                                                                                                                                                      | Very high |
| 24                              | 4.11 | Is it likely that the taxon's mode of existence (e.g. excretion of by-products) or behaviours (e.g. feeding) will reduce habitat quality for native taxa?          | No  | No such fact has been observed.                                                                                                                                                                                                                                                                                                                                                                                                                                                                                                                                       | Medium    |
| 25                              | 4.12 | Is the taxon likely to maintain a viable population even when present in low densities (or persisting in adverse conditions by way of a dormant form)?             | No  | No such fact has been observed.                                                                                                                                                                                                                                                                                                                                                                                                                                                                                                                                       | Medium    |
| <b>5. Resource exploitation</b> |      |                                                                                                                                                                    |     |                                                                                                                                                                                                                                                                                                                                                                                                                                                                                                                                                                       |           |
| 26                              | 5.01 | Is the taxon likely to consume threatened or protected native taxa in the RA area?                                                                                 | No  | No such fact has been observed since <i>A. anguilla</i> has very small population in the SC region.                                                                                                                                                                                                                                                                                                                                                                                                                                                                   | Medium    |
| 27                              | 5.02 | Is the taxon likely to sequester food resources (including nutrients) to the detriment of native taxa in the RA area?                                              | No  | No such fact has to be expected since <i>A. anguilla</i> has very small population in the SC region.                                                                                                                                                                                                                                                                                                                                                                                                                                                                  | Medium    |
| <b>6. Reproduction</b>          |      |                                                                                                                                                                    |     |                                                                                                                                                                                                                                                                                                                                                                                                                                                                                                                                                                       |           |
| 28                              | 6.01 | Is the taxon likely to exhibit parental care and/or to reduce age-at-maturity in response to environmental conditions?                                             | No  | No such fact has been observed.                                                                                                                                                                                                                                                                                                                                                                                                                                                                                                                                       | Medium    |
| 29                              | 6.02 | Is the taxon likely to produce viable gametes or propagules (in the RA area)?                                                                                      | No  | <i>A. anguilla</i> migrates to the depths of the Sargasso Sea to spawn (Deelder, 1984; Rochard and Elie, 1994)                                                                                                                                                                                                                                                                                                                                                                                                                                                        | Very high |
| 30                              | 6.03 | Is the taxon likely to hybridise naturally with native taxa?                                                                                                       | No  | There is no data of hybridization of this species with native taxa.                                                                                                                                                                                                                                                                                                                                                                                                                                                                                                   | High      |
| 31                              | 6.04 | Is the taxon likely to be hermaphroditic or to display asexual reproduction?                                                                                       | Yes | According to Wiberg (1983) the karyological investigation revealed that in some of the specimens a heteromorphic chromosome pair was present. This heteromorphism appeared in both sexes of <i>A. anguilla</i> and in the hermaphrodite.                                                                                                                                                                                                                                                                                                                              | Very high |
| 32                              | 6.05 | Is the taxon dependent on the presence of another taxon (or specific habitat features) to complete its life cycle?                                                 | Yes | Young eels live in freshwater, where they stay for a period of 6-12 years for males and 9-18 years for females. As the eels become sexually mature they migrate to the sea, where they move to the spawning grounds in the Sargasso Sea. During migration the eels do not feed. Once in the Sargasso Sea the eels spawn in late winter and spring. Adult eels do not leave the Sargasso Sea but their progeny, the leaf-shaped larvae (leptocephali) are brought to the continental shelf of Europe by the Gulf Stream, a journey that takes 200-300 days (FAO 2021). | Very high |
| 33                              | 6.06 | Is the taxon known (or likely) to produce a large number of propagules or offspring within a short time span (e.g. < 1 year)?                                      | Yes | There is little information on their reproduction, but since European eels are closely related to Japanese eels, <i>Anguilla japonica</i> , similar breeding patterns might be assumed. Female <i>A. japonica</i> can lay from 2,000,000 to 10,000,000 eggs, but die soon after spawning (Deelder, 1970).                                                                                                                                                                                                                                                             | Very high |
| 34                              | 6.07 | How many time units (days, months, years) does the taxon require to reach the age-at-first-reproduction?                                                           | 7   | The lifespan of European eels is dependent on maturation time because once eels mature and spawn, they die. European eels can spawn as early as 7 years old (Dekker et al. 1998).                                                                                                                                                                                                                                                                                                                                                                                     | High      |
| <b>7. Dispersal mechanisms</b>  |      |                                                                                                                                                                    |     |                                                                                                                                                                                                                                                                                                                                                                                                                                                                                                                                                                       |           |
| 35                              | 7.01 | How many potential internal vectors/pathways could the taxon use to disperse within the RA area (with suitable protected areas (e.g. MCZ, MPA, SSSI)?              | >1  | This species is naturally occurring in the SC region with very small population. Probably it can also spread by humans for aquaculture purposes.                                                                                                                                                                                                                                                                                                                                                                                                                      | Medium    |
| 36                              | 7.02 | Will any of these vectors/pathways bring the taxon in close proximity to one or more protected areas (e.g. MCZ, MPA, SSSI)?                                        | Yes | There is a possibility of that. For instance in west Georgia there is Kolkheti National Park which is located in the natural area of <i>A. anguilla</i> .                                                                                                                                                                                                                                                                                                                                                                                                             | Medium    |
| 37                              | 7.03 | Does the taxon have a means of actively attaching itself to hard substrata (e.g. ship hulls, pilings, buoys) such that it enhances the likelihood of dispersal?    | No  | No such fact has been observed.                                                                                                                                                                                                                                                                                                                                                                                                                                                                                                                                       | Low       |
| 38                              | 7.04 | Is natural dispersal of the taxon likely to occur as eggs (for animals) or as propagules (for plants: seeds, spores) in the RA area?                               | No  | No such fact has been observed.                                                                                                                                                                                                                                                                                                                                                                                                                                                                                                                                       | Medium    |
| 39                              | 7.05 | Is natural dispersal of the taxon likely to occur as larvae/juveniles (for animals) or as fragments/seedlings (for plants) in the RA area?                         | No  | No such fact has been observed.                                                                                                                                                                                                                                                                                                                                                                                                                                                                                                                                       | Medium    |
| 40                              | 7.06 | Are older life stages of the taxon likely to migrate in the RA area for reproduction?                                                                              | No  | No such fact has been observed. This species is spawning in the Sargasso Sea.                                                                                                                                                                                                                                                                                                                                                                                                                                                                                         | Very high |
| 41                              | 7.07 | Are propagules or eggs of the taxon likely to be dispersed in the RA area by other animals?                                                                        | No  | No such fact has been observed.                                                                                                                                                                                                                                                                                                                                                                                                                                                                                                                                       | High      |
| 42                              | 7.08 | Is dispersal of the taxon along any of the vectors/pathways mentioned in the previous seven questions (35-41; i.e. both unintentional or intentional) likely to be | No  | No such fact has been observed.                                                                                                                                                                                                                                                                                                                                                                                                                                                                                                                                       | Medium    |
| 43                              | 7.09 | Is dispersal of the taxon density dependent?                                                                                                                       | No  | No such fact has been observed.                                                                                                                                                                                                                                                                                                                                                                                                                                                                                                                                       | Medium    |
| <b>8. Tolerance attributes</b>  |      |                                                                                                                                                                    |     |                                                                                                                                                                                                                                                                                                                                                                                                                                                                                                                                                                       |           |

|    |      |                                                                                                                                                                              |     |                                                                                                                                                                                                                                    |        |
|----|------|------------------------------------------------------------------------------------------------------------------------------------------------------------------------------|-----|------------------------------------------------------------------------------------------------------------------------------------------------------------------------------------------------------------------------------------|--------|
| 44 | 8.01 | Is the taxon able to withstand being out of water for extended periods (e.g. minimum of one or more hours) at some stage of its life cycle?                                  | No  | No such fact has been observed.                                                                                                                                                                                                    | High   |
| 45 | 8.02 | Is the taxon tolerant of a wide range of water quality conditions relevant to that taxon? [In the Justification field, indicate the relevant water quality variable(s) being | No  | Populations of the European eel ( <i>Anguilla anguilla</i> ) are declining rapidly and are now considered below safe biological limits. High pollution levels are one of the possible reasons for this decline (Guhl et al. 2014). | High   |
| 46 | 8.03 | Can the taxon be controlled or eradicated in the wild with chemical, biological, or other agents/means?                                                                      | No  | No data. We think there is no need for that since <i>A. anguilla</i> has very small endangered populations in the world.                                                                                                           | Medium |
| 47 | 8.04 | Is the taxon likely to tolerate or benefit from environmental/human disturbance?                                                                                             | No  | Dam construction and other human activities has negative impacts on this species (IUCN 2018).                                                                                                                                      | High   |
| 48 | 8.05 | Is the taxon able to tolerate salinity levels that are higher or lower than those found in its usual environment?                                                            | Yes | Inhabits all types of benthic habitats from streams to shores of large rivers and lakes. Naturally found only in water bodies connected to the sea (Kottelat and Freyhof, 2007).                                                   | High   |
| 49 | 8.06 | Are there effective natural enemies (predators) of the taxon present in the RA area?                                                                                         | Yes | There are many potential predators in the SC region, e.g. birds, mammals, fish ( <i>Esox lucius</i> , <i>Silurus glanis</i> etc.) which can eat <i>A. anguilla</i> .                                                               | High   |

### C. Climate change

#### 9. Climate change

|    |      |                                                                                                                                                              |           |               |        |
|----|------|--------------------------------------------------------------------------------------------------------------------------------------------------------------|-----------|---------------|--------|
| 50 | 9.01 | Under the predicted future climatic conditions, are the risks of entry into the RA area posed by the taxon likely to increase, decrease or not change?       | Decrease  | Own judgement | Medium |
| 51 | 9.02 | Under the predicted future climatic conditions, are the risks of establishment posed by the taxon likely to increase, decrease or not change?                | Decrease  | Own judgement | Medium |
| 52 | 9.03 | Under the predicted future climatic conditions, are the risks of dispersal within the RA area posed by the taxon likely to increase, decrease or not change? | Decrease  | Own judgement | Medium |
| 53 | 9.04 | Under the predicted future climatic conditions, what is the likely magnitude of future potential impacts on biodiversity and/or ecological integrity/status? | No change | Own judgement | High   |
| 54 | 9.05 | Under the predicted future climatic conditions, what is the likely magnitude of future potential impacts on ecosystem structure and/or function?             | No change | Own judgement | High   |
| 55 | 9.06 | Under the predicted future climatic conditions, what is the likely magnitude of future potential impacts on ecosystem services/socio-economic factors?       | No change | Own judgement | High   |

| Statistics                                     |             |
|------------------------------------------------|-------------|
| Scores                                         |             |
| <b>BRA</b>                                     | <b>1.0</b>  |
| <b>BRA Outcome</b>                             | <b>-</b>    |
| <b>BRA+CCA</b>                                 | <b>-5.0</b> |
| <b>BRA+CCA Outcome</b>                         | <b>-</b>    |
| Score partition                                |             |
| <b>A. Biogeography/Historical</b>              | <b>2.0</b>  |
| 1. Domestication/Cultivation                   | 2.0         |
| 2. Climate, distribution and introduction risk | 2.0         |
| 3. Invasive elsewhere                          | -2.0        |
| <b>B. Biology/Ecology</b>                      | <b>-1.0</b> |
| 4. Undesirable (or persistence) traits         | 4.0         |
| 5. Resource exploitation                       | 0.0         |
| 6. Reproduction                                | -1.0        |
| 7. Dispersal mechanisms                        | -3.0        |
| 8. Tolerance attributes                        | -1.0        |
| <b>C. Climate change</b>                       | <b>-6.0</b> |
| 9. Climate change                              | -6.0        |
| Answered Questions                             |             |
| <b>Total</b>                                   | <b>55</b>   |
| <b>A. Biogeography/Historical</b>              | <b>13</b>   |
| 1. Domestication/Cultivation                   | 3           |
| 2. Climate, distribution and introduction risk | 5           |
| 3. Invasive elsewhere                          | 5           |
| <b>B. Biology/Ecology</b>                      | <b>36</b>   |
| 4. Undesirable (or persistence) traits         | 12          |
| 5. Resource exploitation                       | 2           |
| 6. Reproduction                                | 7           |
| 7. Dispersal mechanisms                        | 9           |
| 8. Tolerance attributes                        | 6           |
| <b>C. Climate change</b>                       | <b>6</b>    |
| 9. Climate change                              | 6           |
| Sectors affected                               |             |
| <b>Commercial</b>                              | <b>6</b>    |
| <b>Environmental</b>                           | <b>1</b>    |
| <b>Species or population nuisance traits</b>   | <b>-8</b>   |

### Thresholds



|            |      |
|------------|------|
| BRA        | -    |
| BRA+CCA    | -    |
| Confidence |      |
| BRA+CCA    | 0.69 |
| BRA        | 0.69 |
| CCA        | 0.63 |

|                     |
|---------------------|
| Date and Time       |
| 02/05/2022 18:45:47 |

## AS-ISK v2

| Taxon and Assessor details         |                                                                                                                             |
|------------------------------------|-----------------------------------------------------------------------------------------------------------------------------|
| Category                           | Fishes and Lampreys (freshwater)                                                                                            |
| Taxon name                         | <i>Anguilla anguilla</i>                                                                                                    |
| Common name                        | European eel                                                                                                                |
| Assessor                           | Tatia Kuljanishvili                                                                                                         |
| Risk screening context             |                                                                                                                             |
| Reason and socio-economic benefits | Passing through the Volga-Baltic waterway, <i>A. anguilla</i> accidentally appeared in the Volga River,                     |
| Risk assessment area               | South Caucasus                                                                                                              |
| Taxonomy                           | Actinopteri (ray-finned fishes) > Anguilliformes (Eels and morays) > Anguillidae                                            |
| Native range                       | Atlantic Ocean                                                                                                              |
| Introduced range                   | The Caspian basin                                                                                                           |
| URL                                | <a href="https://www.fishbase.se/summary/Anguilla-anguilla.html">https://www.fishbase.se/summary/Anguilla-anguilla.html</a> |

|                                                |      | Response                                                                                                                                                                | Justification (references and/or other information) | Confidence                                                                                                                                                                                                                                                                                                                                                                                                                                                                                                                                                                                                                                                                                                                                                                        |           |
|------------------------------------------------|------|-------------------------------------------------------------------------------------------------------------------------------------------------------------------------|-----------------------------------------------------|-----------------------------------------------------------------------------------------------------------------------------------------------------------------------------------------------------------------------------------------------------------------------------------------------------------------------------------------------------------------------------------------------------------------------------------------------------------------------------------------------------------------------------------------------------------------------------------------------------------------------------------------------------------------------------------------------------------------------------------------------------------------------------------|-----------|
| A. Biogeography/Historical                     |      |                                                                                                                                                                         |                                                     |                                                                                                                                                                                                                                                                                                                                                                                                                                                                                                                                                                                                                                                                                                                                                                                   |           |
| 1. Domestication/Cultivation                   |      |                                                                                                                                                                         |                                                     |                                                                                                                                                                                                                                                                                                                                                                                                                                                                                                                                                                                                                                                                                                                                                                                   |           |
| 1                                              | 1.01 | Has the taxon been the subject of domestication (or cultivation) for at least 20 generations?                                                                           | Yes                                                 | Juveniles of the eel are being caught and transported to different places for farming.                                                                                                                                                                                                                                                                                                                                                                                                                                                                                                                                                                                                                                                                                            | High      |
| 2                                              | 1.02 | Is the taxon harvested in the wild and likely to be sold or used in its live form?                                                                                      | Yes                                                 | Juveniles of the eel are being caught and transported to different places for farming.                                                                                                                                                                                                                                                                                                                                                                                                                                                                                                                                                                                                                                                                                            | Very high |
| 3                                              | 1.03 | Does the taxon have invasive races, varieties, sub-taxa or congeners?                                                                                                   | Yes                                                 | Asian swamp eel (Reinert et al 2006).                                                                                                                                                                                                                                                                                                                                                                                                                                                                                                                                                                                                                                                                                                                                             | High      |
| 2. Climate, distribution and introduction risk |      |                                                                                                                                                                         |                                                     |                                                                                                                                                                                                                                                                                                                                                                                                                                                                                                                                                                                                                                                                                                                                                                                   |           |
| 4                                              | 2.01 | How similar are the climatic conditions of the Risk Assessment (RA) area and the taxon's native range?                                                                  | High                                                | Very similar                                                                                                                                                                                                                                                                                                                                                                                                                                                                                                                                                                                                                                                                                                                                                                      | High      |
| 5                                              | 2.02 | What is the quality of the climate matching data?                                                                                                                       | High                                                | High                                                                                                                                                                                                                                                                                                                                                                                                                                                                                                                                                                                                                                                                                                                                                                              | High      |
| 6                                              | 2.03 | Is the taxon already present outside of captivity in the RA area?                                                                                                       | Yes                                                 | Since this species necessarily need to migrate to the atlantic basin for reproduction, the records of this species from RA are only accidental.                                                                                                                                                                                                                                                                                                                                                                                                                                                                                                                                                                                                                                   | Low       |
| 7                                              | 2.04 | How many potential vectors could the taxon use to enter in the RA area?                                                                                                 | One                                                 | Aquaculture                                                                                                                                                                                                                                                                                                                                                                                                                                                                                                                                                                                                                                                                                                                                                                       | High      |
| 8                                              | 2.05 | Is the taxon currently found in close proximity to, and likely to enter into, the RA area in the near future (e.g. unintentional and intentional introductions)?        | No                                                  | It is likely, but there is no chance that this species could survive. there is no documented evidence that this organism is established in neighbouring river or lake or whatsoever.                                                                                                                                                                                                                                                                                                                                                                                                                                                                                                                                                                                              | Medium    |
| 3. Invasive elsewhere                          |      |                                                                                                                                                                         |                                                     |                                                                                                                                                                                                                                                                                                                                                                                                                                                                                                                                                                                                                                                                                                                                                                                   |           |
| 9                                              | 3.01 | Has the taxon become naturalised (established viable populations) outside its native range?                                                                             | No                                                  | The European eel has been recorded on the East coast and spreading south to Florida. Historical data stated the eel was found off the coast of California, but no populations were established due to an overall unfavorable habitat for the European eel. <a href="http://www.tsusinvasives.org/home/database/anguilla-">http://www.tsusinvasives.org/home/database/anguilla-</a>                                                                                                                                                                                                                                                                                                                                                                                                | High      |
| 10                                             | 3.02 | In the taxon's introduced range, are there known adverse impacts to wild stocks or commercial taxa?                                                                     | Yes                                                 | European eels present an ecological threat to the American eel ( <i>Anguilla rostrata</i> ), which is only found in North America. European eels have been recorded to carry a parasitic nematode, <i>Anguillicola crassus</i> , capable of causing severe damage to it's host. This parasite infects the swim bladder of the host resulting in acute inflammatory reactions such as fibrosis or fibrotic conglomerates, constriction of the intestine due to scar tissue, and complete rupture of the swim bladder in severe cases. This kind of damage can lead to unsuccessful migration, preventing spawning and death. With eel populations in decline, the spread of this nematode poses further risk to native American eel populations from exposure to infected European | High      |
| 11                                             | 3.03 | In the taxon's introduced range, are there known adverse impacts to aquaculture?                                                                                        | No                                                  | it is not known                                                                                                                                                                                                                                                                                                                                                                                                                                                                                                                                                                                                                                                                                                                                                                   | Low       |
| 12                                             | 3.04 | In the taxon's introduced range, are there known adverse impacts to ecosystem                                                                                           | Yes                                                 | Can transmit diseases and parasites                                                                                                                                                                                                                                                                                                                                                                                                                                                                                                                                                                                                                                                                                                                                               | Low       |
| 13                                             | 3.05 | In the taxon's introduced range, are there known adverse socio-economic impacts?                                                                                        | No                                                  | it is not known                                                                                                                                                                                                                                                                                                                                                                                                                                                                                                                                                                                                                                                                                                                                                                   | Low       |
| B. Biology/Ecology                             |      |                                                                                                                                                                         |                                                     |                                                                                                                                                                                                                                                                                                                                                                                                                                                                                                                                                                                                                                                                                                                                                                                   |           |
| 4. Undesirable (or persistence) traits         |      |                                                                                                                                                                         |                                                     |                                                                                                                                                                                                                                                                                                                                                                                                                                                                                                                                                                                                                                                                                                                                                                                   |           |
| 14                                             | 4.01 | Is it likely that the taxon will be poisonous or pose other risks to human health?                                                                                      | No                                                  | Not poisonous See: <a href="https://fishbase.mnhn.fr/summary/Anguilla-anguilla.html">https://fishbase.mnhn.fr/summary/Anguilla-anguilla.html</a>                                                                                                                                                                                                                                                                                                                                                                                                                                                                                                                                                                                                                                  | Very high |
| 15                                             | 4.02 | Is it likely that the taxon will smother one or more native taxa (that are not threatened or protected)?                                                                | Yes                                                 | are considered threat to the American eel in North America                                                                                                                                                                                                                                                                                                                                                                                                                                                                                                                                                                                                                                                                                                                        | High      |
| 16                                             | 4.03 | Are there any threatened or protected taxa that the non-native taxon would parasitise in the RA area?                                                                   | No                                                  | Does not parasitize. See <a href="https://fishbase.mnhn.fr/summary/Anguilla-anguilla.html">https://fishbase.mnhn.fr/summary/Anguilla-anguilla.html</a>                                                                                                                                                                                                                                                                                                                                                                                                                                                                                                                                                                                                                            | Very high |
| 17                                             | 4.04 | Is the taxon adaptable in terms of climatic and other environmental conditions, thus enhancing its potential persistence if it has invaded or could invade the RA area? | No                                                  | Not adaptable to climatic and environmental conditions                                                                                                                                                                                                                                                                                                                                                                                                                                                                                                                                                                                                                                                                                                                            | Very high |
| 18                                             | 4.05 | Is the taxon likely to disrupt food-web structure/function in aquatic ecosystems if it has invaded or is likely to invade the RA                                        | No                                                  | it is not known                                                                                                                                                                                                                                                                                                                                                                                                                                                                                                                                                                                                                                                                                                                                                                   | Medium    |
| 19                                             | 4.06 | Is the taxon likely to exert adverse impacts on ecosystem services in the RA area?                                                                                      | No                                                  | It is considered as harmless to humans <a href="https://fishbase.mnhn.fr/summary/Anguilla-anguilla.html">https://fishbase.mnhn.fr/summary/Anguilla-anguilla.html</a>                                                                                                                                                                                                                                                                                                                                                                                                                                                                                                                                                                                                              | Very high |

|                                 |      |                                                                                                                                                                    |     |                                                                                                                                                                                                                                                                                                                                                                                                                                                                                                                                                                                                                                       |           |
|---------------------------------|------|--------------------------------------------------------------------------------------------------------------------------------------------------------------------|-----|---------------------------------------------------------------------------------------------------------------------------------------------------------------------------------------------------------------------------------------------------------------------------------------------------------------------------------------------------------------------------------------------------------------------------------------------------------------------------------------------------------------------------------------------------------------------------------------------------------------------------------------|-----------|
| 20                              | 4.07 | Is it likely that the taxon will host, and/or act as a vector for, recognised pests and infectious agents that are endemic in the RA                               | Yes | yes it is likely                                                                                                                                                                                                                                                                                                                                                                                                                                                                                                                                                                                                                      | Medium    |
| 21                              | 4.08 | Is it likely that the taxon will host, and/or act as a vector for, recognised pests and infectious agents that are absent from (novel to) the RA area?             | Yes | Although not studied it is likely                                                                                                                                                                                                                                                                                                                                                                                                                                                                                                                                                                                                     | High      |
| 22                              | 4.09 | Is it likely that the taxon will achieve a body size that will make it more likely to be released from captivity?                                                  | Yes | Max length : 122 cm TL male/unsexed; 133.0 cm TL; common length : 35.0 cm TL male/unsexed; common length :50 cm TL (female); max. published weight: 6.6 kg<br><a href="https://fishbase.mnhn.fr/summary/Anguilla-anguilla.html">https://fishbase.mnhn.fr/summary/Anguilla-anguilla.html</a>                                                                                                                                                                                                                                                                                                                                           | High      |
| 23                              | 4.10 | Is the taxon capable of sustaining itself in a range of water velocity conditions (e.g. versatile in habitat use)?                                                 | Yes | It is catadromous species that migrates for reproduction for several thousands of kilometers and it is capable of sustaining itself in a range water velocity conditions                                                                                                                                                                                                                                                                                                                                                                                                                                                              | High      |
| 24                              | 4.11 | Is it likely that the taxon's mode of existence (e.g. excretion of by-products) or behaviours (e.g. feeding) will reduce habitat quality for native taxa?          | No  | Less likely                                                                                                                                                                                                                                                                                                                                                                                                                                                                                                                                                                                                                           | High      |
| 25                              | 4.12 | Is the taxon likely to maintain a viable population even when present in low densities (or persisting in adverse conditions by way of a dormant form)?             | No  | Since this species is catadromous it can't just maintain a population anywhere. It all depends wheather it has access to the marine waters                                                                                                                                                                                                                                                                                                                                                                                                                                                                                            | High      |
| <b>5. Resource exploitation</b> |      |                                                                                                                                                                    |     |                                                                                                                                                                                                                                                                                                                                                                                                                                                                                                                                                                                                                                       |           |
| 26                              | 5.01 | Is the taxon likely to consume threatened or protected native taxa in the RA area?                                                                                 | Yes | Since this species eats almost all food it is possible that it will consume threatened or protected native taxa, however there is no information about it available                                                                                                                                                                                                                                                                                                                                                                                                                                                                   | Low       |
| 27                              | 5.02 | Is the taxon likely to sequester food resources (including nutrients) to the detriment of native taxa in the RA area?                                              | No  | Not documented                                                                                                                                                                                                                                                                                                                                                                                                                                                                                                                                                                                                                        | Very high |
| <b>6. Reproduction</b>          |      |                                                                                                                                                                    |     |                                                                                                                                                                                                                                                                                                                                                                                                                                                                                                                                                                                                                                       |           |
| 28                              | 6.01 | Is the taxon likely to exhibit parental care and/or to reduce age-at-maturity in response to environmental conditions?                                             | Yes | "Eels resident in salt water grew on average in length 2.2 times faster than freshwater residents and increased in weight 5.3 times faster than freshwater residents. Previous findings of superior American eel growth rate in brackish water are thus extended to full-strength salt water. Freshwater residents took an estimated 2.4 times longer than saltwater residents to reach the silver eel stage."<br><a href="https://www.earth.sinica.edu.tw/content/people/EPMA/papers/Published%20PDF%20files/Fishery%202002-">https://www.earth.sinica.edu.tw/content/people/EPMA/papers/Published%20PDF%20files/Fishery%202002-</a> | Medium    |
| 29                              | 6.02 | Is the taxon likely to produce viable gametes or propagules (in the RA area)?                                                                                      | No  | This is a catadromous species that needs marine water for successful reproduction. Since there are no such conditions available in research area, this species can not produce viable                                                                                                                                                                                                                                                                                                                                                                                                                                                 | Very high |
| 30                              | 6.03 | Is the taxon likely to hybridise naturally with native taxa?                                                                                                       | No  | No, it is not likley.                                                                                                                                                                                                                                                                                                                                                                                                                                                                                                                                                                                                                 | Very high |
| 31                              | 6.04 | Is the taxon likely to be hermaphroditic or to display asexual reproduction?                                                                                       | No  | No. <a href="https://fishbase.mnhn.fr/summary/Anguilla-anguilla.html">https://fishbase.mnhn.fr/summary/Anguilla-anguilla.html</a>                                                                                                                                                                                                                                                                                                                                                                                                                                                                                                     | Very high |
| 32                              | 6.05 | Is the taxon dependent on the presence of another taxon (or specific habitat features) to complete its life cycle?                                                 | No  | No <a href="https://fishbase.mnhn.fr/summary/Anguilla-anguilla.html">https://fishbase.mnhn.fr/summary/Anguilla-anguilla.html</a>                                                                                                                                                                                                                                                                                                                                                                                                                                                                                                      | Very high |
| 33                              | 6.06 | Is the taxon known (or likely) to produce a large number of propagules or offspring within a short time span (e.g. < 1 year)?                                      | No  | This species matures within 10-25years old and lays up to 5 million eggs, and after that it dies.                                                                                                                                                                                                                                                                                                                                                                                                                                                                                                                                     | Medium    |
| 34                              | 6.07 | How many time units (days, months, years) does the taxon require to reach the age-at-first-reproduction?                                                           | >10 | 10-25 years                                                                                                                                                                                                                                                                                                                                                                                                                                                                                                                                                                                                                           | Very high |
| <b>7. Dispersal mechanisms</b>  |      |                                                                                                                                                                    |     |                                                                                                                                                                                                                                                                                                                                                                                                                                                                                                                                                                                                                                       |           |
| 35                              | 7.01 | How many potential internal vectors/pathways could the taxon use to disperse within the RA area (with suitable                                                     | One | Aquaculture                                                                                                                                                                                                                                                                                                                                                                                                                                                                                                                                                                                                                           | Very high |
| 36                              | 7.02 | Will any of these vectors/pathways bring the taxon in close proximity to one or more protected areas (e.g. MCZ, MPA, SSSI)?                                        | No  | This vector is not that rapid that it will cause bringing it close to protected areas                                                                                                                                                                                                                                                                                                                                                                                                                                                                                                                                                 | High      |
| 37                              | 7.03 | Does the taxon have a means of actively attaching itself to hard substrata (e.g. ship hulls, pilings, buoys) such that it enhances the likelihood of dispersal?    | No  | No <a href="https://fishbase.mnhn.fr/summary/Anguilla-anguilla.html">https://fishbase.mnhn.fr/summary/Anguilla-anguilla.html</a>                                                                                                                                                                                                                                                                                                                                                                                                                                                                                                      | Very high |
| 38                              | 7.04 | Is natural dispersal of the taxon likely to occur as eggs (for animals) or as propagules (for plants: seeds, spores) in the RA area?                               | No  | No it is not possible.                                                                                                                                                                                                                                                                                                                                                                                                                                                                                                                                                                                                                | High      |
| 39                              | 7.05 | Is natural dispersal of the taxon likely to occur as larvae/juveniles (for animals) or as fragments/seedlings (for plants) in the RA area?                         | No  | No. due to its mating behaviour this is not possible                                                                                                                                                                                                                                                                                                                                                                                                                                                                                                                                                                                  | Very high |
| 40                              | 7.06 | Are older life stages of the taxon likely to migrate in the RA area for reproduction?                                                                              | No  | No. not recorded.                                                                                                                                                                                                                                                                                                                                                                                                                                                                                                                                                                                                                     | Very high |
| 41                              | 7.07 | Are propagules or eggs of the taxon likely to be dispersed in the RA area by other animals?                                                                        | No  | Not possible.                                                                                                                                                                                                                                                                                                                                                                                                                                                                                                                                                                                                                         | Very high |
| 42                              | 7.08 | Is dispersal of the taxon along any of the vectors/pathways mentioned in the previous seven questions (35-41; i.e. both unintentional or intentional) likely to be | No  | No.it is not documented.                                                                                                                                                                                                                                                                                                                                                                                                                                                                                                                                                                                                              | Very high |
| 43                              | 7.09 | Is dispersal of the taxon density dependent?                                                                                                                       | No  | No.it is not documented.                                                                                                                                                                                                                                                                                                                                                                                                                                                                                                                                                                                                              | High      |
| <b>8. Tolerance attributes</b>  |      |                                                                                                                                                                    |     |                                                                                                                                                                                                                                                                                                                                                                                                                                                                                                                                                                                                                                       |           |

|    |      |                                                                                                                                                                              |     |                                                                                                   |           |
|----|------|------------------------------------------------------------------------------------------------------------------------------------------------------------------------------|-----|---------------------------------------------------------------------------------------------------|-----------|
| 44 | 8.01 | Is the taxon able to withstand being out of water for extended periods (e.g. minimum of one or more hours) at some stage of its life cycle?                                  | No  | No.it is not documented.                                                                          | Very high |
| 45 | 8.02 | Is the taxon tolerant of a wide range of water quality conditions relevant to that taxon? [In the Justification field, indicate the relevant water quality variable(s) being | No  | it is not tolerant                                                                                | Medium    |
| 46 | 8.03 | Can the taxon be controlled or eradicated in the wild with chemical, biological, or other agents/means?                                                                      | Yes | it can be                                                                                         | High      |
| 47 | 8.04 | Is the taxon likely to tolerate or benefit from environmental/human disturbance?                                                                                             | No  | No.it is not documented.                                                                          | Very high |
| 48 | 8.05 | Is the taxon able to tolerate salinity levels that are higher or lower than those found in its usual environment?                                                            | Yes | It can tolerate different salinity levels because, some live in freshwaters, and some in Brakish. | High      |
| 49 | 8.06 | Are there effective natural enemies (predators) of the taxon present in the RA                                                                                               | No  | No.it is not documented.                                                                          | Very high |

#### C. Climate change

##### 9. Climate change

|    |      |                                                                                                                                                              |           |                                                                                                                                                                                                                                                    |           |
|----|------|--------------------------------------------------------------------------------------------------------------------------------------------------------------|-----------|----------------------------------------------------------------------------------------------------------------------------------------------------------------------------------------------------------------------------------------------------|-----------|
| 50 | 9.01 | Under the predicted future climatic conditions, are the risks of entry into the RA area posed by the taxon likely to increase, decrease or not change?       | Increase  | It was hypotheses that climate change might alert the mechanisms of transportation and introduction of non-native species. Commercial and recreational activities will increase, that itself increases the propagule pressure levels of non-native | High      |
| 51 | 9.02 | Under the predicted future climatic conditions, are the risks of establishment posed by the taxon likely to increase, decrease or not change?                | No change | No change                                                                                                                                                                                                                                          | Very high |
| 52 | 9.03 | Under the predicted future climatic conditions, are the risks of dispersal within the RA area posed by the taxon likely to increase, decrease or not change? | No change | No change                                                                                                                                                                                                                                          | Very high |
| 53 | 9.04 | Under the predicted future climatic conditions, what is the likely magnitude of future potential impacts on biodiversity and/or ecological integrity/status? | No change | No change                                                                                                                                                                                                                                          | Very high |
| 54 | 9.05 | Under the predicted future climatic conditions, what is the likely magnitude of future potential impacts on ecosystem structure and/or function?             | No change | No change                                                                                                                                                                                                                                          | Very high |
| 55 | 9.06 | Under the predicted future climatic conditions, what is the likely magnitude of future potential impacts on ecosystem services/socio-economic factors?       | No change | No change                                                                                                                                                                                                                                          | Very high |

| Statistics                                     |             |
|------------------------------------------------|-------------|
| Scores                                         |             |
| <b>BRA</b>                                     | <b>15.0</b> |
| <b>BRA Outcome</b>                             | <b>-</b>    |
| <b>BRA+CCA</b>                                 | <b>17.0</b> |
| <b>BRA+CCA Outcome</b>                         | <b>-</b>    |
| Score partition                                |             |
| <b>A. Biogeography/Historical</b>              | <b>13.0</b> |
| 1. Domestication/Cultivation                   | 4.0         |
| 2. Climate, distribution and introduction risk | 1.0         |
| 3. Invasive elsewhere                          | 8.0         |
| <b>B. Biology/Ecology</b>                      | <b>2.0</b>  |
| 4. Undesirable (or persistence) traits         | 4.0         |
| 5. Resource exploitation                       | 5.0         |
| 6. Reproduction                                | -1.0        |
| 7. Dispersal mechanisms                        | -5.0        |
| 8. Tolerance attributes                        | -1.0        |
| <b>C. Climate change</b>                       | <b>2.0</b>  |
| 9. Climate change                              | 2.0         |
| Answered Questions                             |             |
| <b>Total</b>                                   | <b>55</b>   |
| <b>A. Biogeography/Historical</b>              | <b>13</b>   |
| 1. Domestication/Cultivation                   | 3           |
| 2. Climate, distribution and introduction risk | 5           |
| 3. Invasive elsewhere                          | 5           |
| <b>B. Biology/Ecology</b>                      | <b>36</b>   |
| 4. Undesirable (or persistence) traits         | 12          |
| 5. Resource exploitation                       | 2           |
| 6. Reproduction                                | 7           |
| 7. Dispersal mechanisms                        | 9           |
| 8. Tolerance attributes                        | 6           |
| <b>C. Climate change</b>                       | <b>6</b>    |
| 9. Climate change                              | 6           |
| Sectors affected                               |             |
| <b>Commercial</b>                              | <b>8</b>    |
| <b>Environmental</b>                           | <b>9</b>    |
| <b>Species or population nuisance traits</b>   | <b>1</b>    |

| Thresholds |          |
|------------|----------|
| <b>BRA</b> | <b>-</b> |

|                   |                |             |
|-------------------|----------------|-------------|
|                   | <b>BRA+CCA</b> | <b>-</b>    |
| <b>Confidence</b> |                |             |
|                   | <b>BRA+CCA</b> | <b>0.79</b> |
|                   | <b>BRA</b>     | <b>0.77</b> |
|                   | <b>CCA</b>     | <b>0.96</b> |

|                            |  |
|----------------------------|--|
| <b>Date and Time</b>       |  |
| <b>20/05/2022 16:06:05</b> |  |

## AS-ISK v2

| Taxon and Assessor details         |                                                                                                                             |
|------------------------------------|-----------------------------------------------------------------------------------------------------------------------------|
| Category                           | Fishes and Lampreys (freshwater)                                                                                            |
| Taxon name                         | <i>Carassius gibelio</i>                                                                                                    |
| Common name                        | gibel carp                                                                                                                  |
| Assessor                           | Bella Japoshvili                                                                                                            |
| Risk screening context             |                                                                                                                             |
| Reason and socio-economic benefits | This is the most widespread invasive species in the region having a significant although less                               |
| Risk assessment area               | South Caucasus                                                                                                              |
| Taxonomy                           | Actinopteri (ray-finned fishes) > Cypriniformes (Carps) > Cyprinidae (Minnows or carps)                                     |
| Native range                       | Northern Eurasia                                                                                                            |
| Introduced range                   | Throughout the world                                                                                                        |
| URL                                | <a href="https://www.fishbase.de/summary/Carassius-gibelio.html">https://www.fishbase.de/summary/Carassius-gibelio.html</a> |

|                                                |      |                                                                                                                                                                         | Response | Justification (references and/or other information)                                                                                                                                                                                                                                                                                                                                                                                                                                                                                                                                                                                                                                        | Confidence |
|------------------------------------------------|------|-------------------------------------------------------------------------------------------------------------------------------------------------------------------------|----------|--------------------------------------------------------------------------------------------------------------------------------------------------------------------------------------------------------------------------------------------------------------------------------------------------------------------------------------------------------------------------------------------------------------------------------------------------------------------------------------------------------------------------------------------------------------------------------------------------------------------------------------------------------------------------------------------|------------|
| A. Biogeography/Historical                     |      |                                                                                                                                                                         |          |                                                                                                                                                                                                                                                                                                                                                                                                                                                                                                                                                                                                                                                                                            |            |
| 1. Domestication/Cultivation                   |      |                                                                                                                                                                         |          |                                                                                                                                                                                                                                                                                                                                                                                                                                                                                                                                                                                                                                                                                            |            |
| 1                                              | 1.01 | Has the taxon been the subject of domestication (or cultivation) for at least 20 generations?                                                                           | Yes      | Rylková, K., Kalous, L., Bohlen, J., Lamatsch, D. K., & Petrtyl, M. (2013). Phylogeny and biogeographic history of the cyprinid fish genus <i>Carassius</i> (Teleostei: Cyprinidae) with focus on natural and anthropogenic arrivals in Europe. <i>Aquaculture</i> , 380, 13-20.                                                                                                                                                                                                                                                                                                                                                                                                           | Very high  |
| 2                                              | 1.02 | Is the taxon harvested in the wild and likely to be sold or used in its live form?                                                                                      | Yes      | Personal observation and numerous own unpublished data.                                                                                                                                                                                                                                                                                                                                                                                                                                                                                                                                                                                                                                    | High       |
| 3                                              | 1.03 | Does the taxon have invasive races, varieties, sub-taxa or congeners?                                                                                                   | Yes      | Other congeners                                                                                                                                                                                                                                                                                                                                                                                                                                                                                                                                                                                                                                                                            | Very high  |
| 2. Climate, distribution and introduction risk |      |                                                                                                                                                                         |          |                                                                                                                                                                                                                                                                                                                                                                                                                                                                                                                                                                                                                                                                                            |            |
| 4                                              | 2.01 | How similar are the climatic conditions of the Risk Assessment (RA) area and the taxon's native range?                                                                  | Medium   | Climmatch comparision                                                                                                                                                                                                                                                                                                                                                                                                                                                                                                                                                                                                                                                                      | Low        |
| 5                                              | 2.02 | What is the quality of the climate matching data?                                                                                                                       | Low      | Due to absence of extensive climate data for the region                                                                                                                                                                                                                                                                                                                                                                                                                                                                                                                                                                                                                                    | High       |
| 6                                              | 2.03 | Is the taxon already present outside of captivity in the RA area?                                                                                                       | Yes      | Kuljanishvili, T., Epitashvili, G., Freyhof, J., Japoshvili, B., Kalous, L., Levin, B., ... & Mumladze, L. (2020). Checklist of the freshwater fishes of Armenia, Azerbaijan and Georgia. <i>Journal of Applied Ichthyology</i> , 36(4), 501-514.                                                                                                                                                                                                                                                                                                                                                                                                                                          | Very high  |
| 7                                              | 2.04 | How many potential vectors could the taxon use to enter in the RA area?                                                                                                 | >1       | Japoshvili, B., Mumladze, L., & Küçük, F. (2013). Invasive <i>Carassius</i> carp in Georgia: Current state of knowledge and future perspectives. <i>Current Zoology</i> , 59(6), 732-739.                                                                                                                                                                                                                                                                                                                                                                                                                                                                                                  | Very high  |
| 8                                              | 2.05 | Is the taxon currently found in close proximity to, and likely to enter into, the RA area in the near future (e.g. unintentional and intentional introductions)?        | Yes      | Kuljanishvili, T., Epitashvili, G., Freyhof, J., Japoshvili, B., Kalous, L., Levin, B., ... & Mumladze, L. (2020). Checklist of the freshwater fishes of Armenia, Azerbaijan and Georgia. <i>Journal of Applied Ichthyology</i> , 36(4), 501-514.                                                                                                                                                                                                                                                                                                                                                                                                                                          | Very high  |
| 3. Invasive elsewhere                          |      |                                                                                                                                                                         |          |                                                                                                                                                                                                                                                                                                                                                                                                                                                                                                                                                                                                                                                                                            |            |
| 9                                              | 3.01 | Has the taxon become naturalised (established viable populations) outside its native range?                                                                             | Yes      | Kuljanishvili, T., Epitashvili, G., Freyhof, J., Japoshvili, B., Kalous, L., Levin, B., ... & Mumladze, L. (2020). Checklist of the freshwater fishes of Armenia, Azerbaijan and Georgia. <i>Journal of Applied Ichthyology</i> , 36(4), 501-514.                                                                                                                                                                                                                                                                                                                                                                                                                                          | Very high  |
| 10                                             | 3.02 | In the taxon's introduced range, are there known adverse impacts to wild stocks or commercial taxa?                                                                     | Yes      | e.g. Yalçın Özdilek, Ş., Partal, N., Jones, R.I., 2019. An invasive species, <i>Carassius gibelio</i> , alters the native fish community through trophic niche competition. <i>Aquat. Sci.</i> 81, 1-11. <a href="https://doi.org/10.1007/s00027-019-0623-6">https://doi.org/10.1007/s00027-019-0623-6</a>                                                                                                                                                                                                                                                                                                                                                                                 | Very high  |
| 11                                             | 3.03 | In the taxon's introduced range, are there known adverse impacts to aquaculture?                                                                                        | Yes      | No documented evidence                                                                                                                                                                                                                                                                                                                                                                                                                                                                                                                                                                                                                                                                     | Low        |
| 12                                             | 3.04 | In the taxon's introduced range, are there known adverse impacts to ecosystem                                                                                           | Yes      | It can modify the ecosystem heavily ( <a href="https://www.cabi.org/isc/datasheet/90562">https://www.cabi.org/isc/datasheet/90562</a> )                                                                                                                                                                                                                                                                                                                                                                                                                                                                                                                                                    | Very high  |
| 13                                             | 3.05 | In the taxon's introduced range, are there known adverse socio-economic impacts?                                                                                        | No       | No documented evidence                                                                                                                                                                                                                                                                                                                                                                                                                                                                                                                                                                                                                                                                     | Medium     |
| B. Biology/Ecology                             |      |                                                                                                                                                                         |          |                                                                                                                                                                                                                                                                                                                                                                                                                                                                                                                                                                                                                                                                                            |            |
| 4. Undesirable (or persistence) traits         |      |                                                                                                                                                                         |          |                                                                                                                                                                                                                                                                                                                                                                                                                                                                                                                                                                                                                                                                                            |            |
| 14                                             | 4.01 | Is it likely that the taxon will be poisonous or pose other risks to human health?                                                                                      | No       | Species is not harmful                                                                                                                                                                                                                                                                                                                                                                                                                                                                                                                                                                                                                                                                     | Very high  |
| 15                                             | 4.02 | Is it likely that the taxon will smother one or more native taxa (that are not threatened or protected)?                                                                | Yes      | Gaygusuz, Ö., Tarkan, A.S., Gaygusuz, Ç.G., 2007. Changes in the fish community of the Ömerli Reservoir (Turkey) following the introduction of non-native gibel carp <i>Carassius gibelio</i> (Bloch, 1782) and other human impacts. <i>Aquat. Invasions</i> 2, 117-120. <a href="https://doi.org/10.3391/ai.2007.2.2.6">https://doi.org/10.3391/ai.2007.2.2.6</a>                                                                                                                                                                                                                                                                                                                         | Very high  |
| 16                                             | 4.03 | Are there any threatened or protected taxa that the non-native taxon would parasitise in the RA area?                                                                   | Yes      | There are number of local endemic/threatened species caviar of which <i>carassius</i> carp can consume                                                                                                                                                                                                                                                                                                                                                                                                                                                                                                                                                                                     | Medium     |
| 17                                             | 4.04 | Is the taxon adaptable in terms of climatic and other environmental conditions, thus enhancing its potential persistence if it has invaded or could invade the RA area? | Yes      | Nilsson, G.E., Renshaw, G.M.C., 2004. Hypoxic survival strategies in two fishes: extreme anoxia tolerance in the North European crucian carp and natural hypoxic preconditioning in a coral-reef shark. <i>J. Exp. Biol.</i> 207, 3131-3139. <a href="https://doi.org/10.1242/jeb.00979">https://doi.org/10.1242/jeb.00979</a> De Boeck, G., Meeus, W., Coen, W. De, Blust, R., 2004. Tissue-specific Cu bioaccumulation patterns and differences in sensitivity to waterborne Cu in three freshwater fish: Rainbow trout ( <i>Oncorhynchus mykiss</i> ), common carp ( <i>Cyprinus carpio</i> ), and gibel carp ( <i>Carassius auratus gibelio</i> ). <i>Aquat. Toxicol.</i> 70, 179-188. | Very high  |

|                                 |      |                                                                                                                                                                 |     |                                                                                                                                                                                                                                                                                                                                                                                                                                                                                                                                                                   |           |
|---------------------------------|------|-----------------------------------------------------------------------------------------------------------------------------------------------------------------|-----|-------------------------------------------------------------------------------------------------------------------------------------------------------------------------------------------------------------------------------------------------------------------------------------------------------------------------------------------------------------------------------------------------------------------------------------------------------------------------------------------------------------------------------------------------------------------|-----------|
| 18                              | 4.05 | Is the taxon likely to disrupt food-web structure/function in aquatic ecosystems if it has invaded or is likely to invade the RA area?                          | Yes | Savini D, Occhipinti-Ambrogi A, Marchini A, Tricarico E, Gherardi F, Olenin S, Gollasch S, 2010. The top 27 animal alien species introduced into Europe for aquaculture and related activities. Journal of Applied Ichthyology [Alien species in aquaculture and fisheries. Proceedings of a conference Managing Alien Species for Sustainable Development of Aquaculture and Fisheries (MALIAF), University of Florence, Italy, 5-7 November 2008.], 26(s2):1-7. <a href="http://www.blackwell-synergy.com/loi/iaj">http://www.blackwell-synergy.com/loi/iaj</a> | Very high |
| 19                              | 4.06 | Is the taxon likely to exert adverse impacts on ecosystem services in the RA area?                                                                              | Yes | Through worsening water quality                                                                                                                                                                                                                                                                                                                                                                                                                                                                                                                                   | High      |
| 20                              | 4.07 | Is it likely that the taxon will host, and/or act as a vector for, recognised pests and infectious agents that are endemic in the RA area?                      | No  | No such a pests or efectins are known                                                                                                                                                                                                                                                                                                                                                                                                                                                                                                                             | High      |
| 21                              | 4.08 | Is it likely that the taxon will host, and/or act as a vector for, recognised pests and infectious agents that are absent from (novel to) the RA area?          | Yes | Japoshvili, B., Mumladze, L., & Murvanidze, L. (2017). The population of Carassius gibelio (Bloch, 1782) and its parasites in Madatapa Lake (South Georgia). Iranian Journal of Fisheries Sciences, 16(2), 793-799.                                                                                                                                                                                                                                                                                                                                               | Very high |
| 22                              | 4.09 | Is it likely that the taxon will achieve a body size that will make it more likely to be released from captivity?                                               | No  | Species is usually small to medium size (Kottelat, M., Freyhof, J., 2007. Handbook of European freshwater fishes. Imprimeria du Democrate SA, Dlemont. <a href="https://doi.org/10.1643/OT-08-098a.1">https://doi.org/10.1643/OT-08-098a.1</a> )                                                                                                                                                                                                                                                                                                                  | High      |
| 23                              | 4.10 | Is the taxon capable of sustaining itself in a range of water velocity conditions (e.g. versatile in habitat use)?                                              | Yes | Uses a number of different water habitats                                                                                                                                                                                                                                                                                                                                                                                                                                                                                                                         | High      |
| 24                              | 4.11 | Is it likely that the taxon's mode of existence (e.g. excretion of by-products) or behaviours (e.g. feeding) will reduce habitat quality for native taxa?       | Yes | Tarkan AS, Gaygusuz Ö, Gaygusuz ÇG, Saç G, Copp GH, 2012. Circumstantial evidence of gibel carp, Carassius gibelio, reproductive competition exerted on native fish species in a mesotrophic reservoir. Fisheries Management and Ecology, 19(2):167-177.                                                                                                                                                                                                                                                                                                          | Very high |
| 25                              | 4.12 | Is the taxon likely to maintain a viable population even when present in low densities (or persisting in adverse conditions by way of a dormant form)?          | Yes | It can survive and reproduce even when there is only a few individuals because of reproductive strategy                                                                                                                                                                                                                                                                                                                                                                                                                                                           | Very high |
| <b>5. Resource exploitation</b> |      |                                                                                                                                                                 |     |                                                                                                                                                                                                                                                                                                                                                                                                                                                                                                                                                                   |           |
| 26                              | 5.01 | Is the taxon likely to consume threatened or protected native taxa in the RA area?                                                                              | Yes | It consumes the egges for instance of Atacus colchicus                                                                                                                                                                                                                                                                                                                                                                                                                                                                                                            | High      |
| 27                              | 5.02 | Is the taxon likely to sequester food resources (including nutrients) to the detriment of native taxa in the RA area?                                           | Yes | Paulovits, G., Tatrai, I., Matyas, K., Korponai, J., Kovats, N., 1998. Role of Prussian Carp (Carassius-Auratus Gibelio Bloch) in the Nutrient Cycle of the Kis-Balaton Reservoir. Int. Rev. Hydrobiol.                                                                                                                                                                                                                                                                                                                                                           | Medium    |
| <b>6. Reproduction</b>          |      |                                                                                                                                                                 |     |                                                                                                                                                                                                                                                                                                                                                                                                                                                                                                                                                                   |           |
| 28                              | 6.01 | Is the taxon likely to exhibit parental care and/or to reduce age-at-maturity in response to environmental conditions?                                          | No  | No documented evidence                                                                                                                                                                                                                                                                                                                                                                                                                                                                                                                                            | High      |
| 29                              | 6.02 | Is the taxon likely to produce viable gametes or propagules (in the RA area)?                                                                                   | Yes | e.g. Kuljanishvili, T., Mumladze, L., Kalous, L., & Japoshvili, B. (2018). Fish species composition, sex ratio and growth parameters in Saghamo Lake (Southern Georgia). Biologia, 73(1),                                                                                                                                                                                                                                                                                                                                                                         | Very high |
| 30                              | 6.03 | Is the taxon likely to hybridise naturally with native taxa?                                                                                                    | Yes | Freyhof J, Kottelat M, 2008. Carassius carassius. IUCN Red List of Threatened Species. <a href="http://www.iucnredlist.org">http://www.iucnredlist.org</a>                                                                                                                                                                                                                                                                                                                                                                                                        | High      |
| 31                              | 6.04 | Is the taxon likely to be hermaphroditic or to display asexual reproduction?                                                                                    | Yes | Paulovits, G., Tatrai, I., Matyas, K., Korponai, J., Kovats, N., 1998. Role of Prussian Carp (Carassius-Auratus Gibelio Bloch) in the Nutrient Cycle of the Kis-Balaton Reservoir. Int. Rev. Hydrobiol.                                                                                                                                                                                                                                                                                                                                                           | Very high |
| 32                              | 6.05 | Is the taxon dependent on the presence of another taxon (or specific habitat features) to complete its life cycle?                                              | No  | Kottelat, M., Freyhof, J., 2007. Handbook of European freshwater fishes. Imprimeria du Democrate SA, Dlemont. <a href="https://doi.org/10.1643/OT-08-098a.1">https://doi.org/10.1643/OT-08-098a.1</a>                                                                                                                                                                                                                                                                                                                                                             | Very high |
| 33                              | 6.06 | Is the taxon known (or likely) to produce a large number of propagules or offspring within a short time span (e.g. < 1 year)?                                   | No  | Kottelat, M., Freyhof, J., 2007. Handbook of European freshwater fishes. Imprimeria du Democrate SA, Dlemont. <a href="https://doi.org/10.1643/OT-08-098a.1">https://doi.org/10.1643/OT-08-098a.1</a>                                                                                                                                                                                                                                                                                                                                                             | Very high |
| 34                              | 6.07 | How many time units (days, months, years) does the taxon require to reach the age-at-first-reproduction?                                                        | 2   | years                                                                                                                                                                                                                                                                                                                                                                                                                                                                                                                                                             | High      |
| <b>7. Dispersal mechanisms</b>  |      |                                                                                                                                                                 |     |                                                                                                                                                                                                                                                                                                                                                                                                                                                                                                                                                                   |           |
| 35                              | 7.01 | How many potential internal vectors/pathways could the taxon use to disperse within the RA area (with suitable vectors)?                                        | >1  | active dispersal, human mediated dispersal, also animal mediated dispersal is possible                                                                                                                                                                                                                                                                                                                                                                                                                                                                            | Very high |
| 36                              | 7.02 | Will any of these vectors/pathways bring the taxon in close proximity to one or more protected areas (e.g. MCZ, MPA, SSSI)?                                     | Yes | It is already everywhere within the RA area                                                                                                                                                                                                                                                                                                                                                                                                                                                                                                                       | Very high |
| 37                              | 7.03 | Does the taxon have a means of actively attaching itself to hard substrata (e.g. ship hulls, pilings, buoys) such that it enhances the likelihood of dispersal? | No  | Species is free swimmer with absence of such a capabilities                                                                                                                                                                                                                                                                                                                                                                                                                                                                                                       | Very high |
| 38                              | 7.04 | Is natural dispersal of the taxon likely to occur as eggs (for animals) or as propagules (for plants: seeds, spores) in the RA area?                            | Yes | No documented evidence                                                                                                                                                                                                                                                                                                                                                                                                                                                                                                                                            | Low       |
| 39                              | 7.05 | Is natural dispersal of the taxon likely to occur as larvae/juveniles (for animals) or as fragments/seedlings (for plants) in the RA area?                      | Yes | No documented evidence but highly expected                                                                                                                                                                                                                                                                                                                                                                                                                                                                                                                        | Low       |
| 40                              | 7.06 | Are older life stages of the taxon likely to migrate in the RA area for reproduction?                                                                           | No  | Species is not migrant at any stage (Kottelat, M., Freyhof, J., 2007. Handbook of European freshwater fishes. Imprimeria du Democrate SA, Dlemont. <a href="https://doi.org/10.1643/OT-08-098a.1">https://doi.org/10.1643/OT-08-098a.1</a> )                                                                                                                                                                                                                                                                                                                      | High      |
| 41                              | 7.07 | Are propagules or eggs of the taxon likely to be dispersed in the RA area by other animals?                                                                     | Yes | Stressed in the literature but not yet well documented                                                                                                                                                                                                                                                                                                                                                                                                                                                                                                            | Low       |

|                                |      |                                                                                                                                                                                           |           |                                                                                                                                                                                                                                                                                                                                                                                |           |
|--------------------------------|------|-------------------------------------------------------------------------------------------------------------------------------------------------------------------------------------------|-----------|--------------------------------------------------------------------------------------------------------------------------------------------------------------------------------------------------------------------------------------------------------------------------------------------------------------------------------------------------------------------------------|-----------|
| 42                             | 7.08 | Is dispersal of the taxon along any of the vectors/pathways mentioned in the previous seven questions (35–41; i.e. both unintentional or intentional) likely to be                        | Yes       | Usually large number of propagule or adults are released                                                                                                                                                                                                                                                                                                                       | Very high |
| 43                             | 7.09 | Is dispersal of the taxon density dependent?                                                                                                                                              | No        | No documented evidence                                                                                                                                                                                                                                                                                                                                                         | High      |
| <b>8. Tolerance attributes</b> |      |                                                                                                                                                                                           |           |                                                                                                                                                                                                                                                                                                                                                                                |           |
| 44                             | 8.01 | Is the taxon able to withstand being out of water for extended periods (e.g. minimum of one or more hours) at some stage of its life cycle?                                               | Yes       | Species is very tolerant with drying or freezing water and can survive for month in such a conditions                                                                                                                                                                                                                                                                          | Very high |
| 45                             | 8.02 | Is the taxon tolerant of a wide range of water quality conditions relevant to that taxon? [In the Justification field, indicate the relevant water quality variable(s) being considered.] | Yes       | e.g. Liasko, R., Koulis, A., Pogrebniak, A., Papiggioti, O., Taranenko, L., Leonardos, I., 2011. Influence of environmental parameters on growth pattern and population structure of <i>Carassius auratus gibelio</i> in Eastern Ukraine. <i>Hydrobiologia</i> 658, 317–328. <a href="https://doi.org/10.1007/s10750-010-0502-6">https://doi.org/10.1007/s10750-010-0502-6</a> | Very high |
| 46                             | 8.03 | Can the taxon be controlled or eradicated in the wild with chemical, biological, or other agents/means?                                                                                   | No        | No successful case exists                                                                                                                                                                                                                                                                                                                                                      | High      |
| 47                             | 8.04 | Is the taxon likely to tolerate or benefit from environmental/human disturbance?                                                                                                          | No        | No documented evidence                                                                                                                                                                                                                                                                                                                                                         | Low       |
| 48                             | 8.05 | Is the taxon able to tolerate salinity levels that are higher or lower than those found in its usual environment?                                                                         | No        | No documented evidence                                                                                                                                                                                                                                                                                                                                                         | Low       |
| 49                             | 8.06 | Are there effective natural enemies (predators) of the taxon present in the RA                                                                                                            | Yes       | Birds, some predatory fishes that are not very effective                                                                                                                                                                                                                                                                                                                       | Medium    |
| <b>C. Climate change</b>       |      |                                                                                                                                                                                           |           |                                                                                                                                                                                                                                                                                                                                                                                |           |
| <b>9. Climate change</b>       |      |                                                                                                                                                                                           |           |                                                                                                                                                                                                                                                                                                                                                                                |           |
| 50                             | 9.01 | Under the predicted future climatic conditions, are the risks of entry into the RA area posed by the taxon likely to increase, decrease or not change?                                    | No change | Not expected because the species is already established in RA area                                                                                                                                                                                                                                                                                                             | Very high |
| 51                             | 9.02 | Under the predicted future climatic conditions, are the risks of establishment posed by the taxon likely to increase, decrease or not change?                                             | Increase  | Based on personal judgment establishment risks would increase                                                                                                                                                                                                                                                                                                                  | High      |
| 52                             | 9.03 | Under the predicted future climatic conditions, are the risks of dispersal within the RA area posed by the taxon likely to increase, decrease or not change?                              | Increase  | Based on personal judgment dispersal risks would increase                                                                                                                                                                                                                                                                                                                      | Medium    |
| 53                             | 9.04 | Under the predicted future climatic conditions, what is the likely magnitude of future potential impacts on biodiversity and/or ecological integrity/status?                              | Higher    | Based on personal judgment environmental impact would increase                                                                                                                                                                                                                                                                                                                 | Medium    |
| 54                             | 9.05 | Under the predicted future climatic conditions, what is the likely magnitude of future potential impacts on ecosystem structure and/or function?                                          | Higher    | Based on personal judgment impact on ecosystems would increase                                                                                                                                                                                                                                                                                                                 | Medium    |
| 55                             | 9.06 | Under the predicted future climatic conditions, what is the likely magnitude of future potential impacts on ecosystem services/socio-economic factors?                                    | Higher    | Based on personal judgment impact on socio-economic and ecosystem services would increase                                                                                                                                                                                                                                                                                      | Low       |

| Statistics                                     |             |
|------------------------------------------------|-------------|
| Scores                                         |             |
| <b>BRA</b>                                     | <b>44.0</b> |
| <b>BRA Outcome</b>                             | -           |
| <b>BRA+CCA</b>                                 | <b>54.0</b> |
| <b>BRA+CCA Outcome</b>                         | -           |
| Score partition                                |             |
| <b>A. Biogeography/Historical</b>              | <b>20.0</b> |
| 1. Domestication/Cultivation                   | 4.0         |
| 2. Climate, distribution and introduction risk | 2.0         |
| 3. Invasive elsewhere                          | 14.0        |
| <b>B. Biology/Ecology</b>                      | <b>24.0</b> |
| 4. Undesirable (or persistence) traits         | 9.0         |
| 5. Resource exploitation                       | 7.0         |
| 6. Reproduction                                | 4.0         |
| 7. Dispersal mechanisms                        | 4.0         |
| 8. Tolerance attributes                        | 0.0         |
| <b>C. Climate change</b>                       | <b>10.0</b> |
| 9. Climate change                              | 10.0        |
| Answered Questions                             |             |
| <b>Total</b>                                   | <b>55</b>   |
| <b>A. Biogeography/Historical</b>              | <b>13</b>   |
| 1. Domestication/Cultivation                   | 3           |
| 2. Climate, distribution and introduction risk | 5           |
| 3. Invasive elsewhere                          | 5           |
| <b>B. Biology/Ecology</b>                      | <b>36</b>   |
| 4. Undesirable (or persistence) traits         | 12          |
| 5. Resource exploitation                       | 2           |
| 6. Reproduction                                | 7           |
| 7. Dispersal mechanisms                        | 9           |
| 8. Tolerance attributes                        | 6           |
| <b>C. Climate change</b>                       | <b>6</b>    |
| 9. Climate change                              | 6           |



| Sectors affected |                                       |    |
|------------------|---------------------------------------|----|
|                  | Commercial                            | 17 |
|                  | Environmental                         | 17 |
|                  | Species or population nuisance traits | 25 |

| Thresholds |         |      |
|------------|---------|------|
|            | BRA     | -    |
|            | BRA+CCA | -    |
| Confidence |         |      |
|            | BRA+CCA | 0.76 |
|            | BRA     | 0.79 |
|            | CCA     | 0.58 |

| Date and Time       |  |
|---------------------|--|
| 04/05/2022 12:14:38 |  |

## AS-ISK v2

| Taxon and Assessor details         |                                                                                                                             |
|------------------------------------|-----------------------------------------------------------------------------------------------------------------------------|
| Category                           | Fishes and Lampreys (freshwater)                                                                                            |
| Taxon name                         | <i>Carassius gibelio</i>                                                                                                    |
| Common name                        | gibel carp                                                                                                                  |
| Assessor                           | Giorgi Epitashvili                                                                                                          |
| Risk screening context             |                                                                                                                             |
| Reason and socio-economic benefits | <i>Carassius gibelio</i> is one of the most widespread invasive species in many countries. This fish is also                |
| Risk assessment area               | South Caucasus                                                                                                              |
| Taxonomy                           | <i>Carassius gibelio</i> (Bloch 1782)                                                                                       |
| Native range                       | Europe and Asia: usually considered as native from central Europe to Siberia                                                |
| Introduced range                   | Introduced to European waters from eastern Asia. Clear and definite data on original distribution in                        |
| URL                                | <a href="https://www.fishbase.se/summary/Carassius-gibelio.html">https://www.fishbase.se/summary/Carassius-gibelio.html</a> |

|                                                |      |                                                                                                                                                                         | Response | Justification (references and/or other information)                                                                                                                                                                                                                                                                                                                                                                                                                   | Confidence |
|------------------------------------------------|------|-------------------------------------------------------------------------------------------------------------------------------------------------------------------------|----------|-----------------------------------------------------------------------------------------------------------------------------------------------------------------------------------------------------------------------------------------------------------------------------------------------------------------------------------------------------------------------------------------------------------------------------------------------------------------------|------------|
| A. Biogeography/Historical                     |      |                                                                                                                                                                         |          |                                                                                                                                                                                                                                                                                                                                                                                                                                                                       |            |
| 1. Domestication/Cultivation                   |      |                                                                                                                                                                         |          |                                                                                                                                                                                                                                                                                                                                                                                                                                                                       |            |
| 1                                              | 1.01 | Has the taxon been the subject of domestication (or cultivation) for at least 20 generations?                                                                           | Yes      | C. gibelio have been introduced intentionally for the purposes of food production (U.S. Fish & Wildlife Service, 2012)                                                                                                                                                                                                                                                                                                                                                | Very high  |
| 2                                              | 1.02 | Is the taxon harvested in the wild and likely to be sold or used in its live form?                                                                                      | Yes      | Farmed crucian carp is entirely sold live or fresh. Drying and salting is only used for crucian carp caught from natural water bodies (rivers and lakes) by some traditional inland fishers (FAO                                                                                                                                                                                                                                                                      | Very high  |
| 3                                              | 1.03 | Does the taxon have invasive races, varieties, sub-taxa or congeners?                                                                                                   | Yes      | A major biological trait responsible for invasiveness in C. gibelio is its mode of reproduction. Invading populations are often triploid and composed of almost exclusively females that exhibit apomictic (gynogenetic) reproduction, using the sperm of other species to activate (but not fertilize) their own eggs (CABI 2019). This species has been reported as invasive in Alberta, Canada (Elgin et al., 2014; Ruppert et al., 2017) and in many countries of | Very high  |
| 2. Climate, distribution and introduction risk |      |                                                                                                                                                                         |          |                                                                                                                                                                                                                                                                                                                                                                                                                                                                       |            |
| 4                                              | 2.01 | How similar are the climatic conditions of the Risk Assessment (RA) area and the taxon's native range?                                                                  | High     | C. gibelio has a wide range and therefore the SC region is somewhat in a suitable climatic zone.                                                                                                                                                                                                                                                                                                                                                                      | Medium     |
| 5                                              | 2.02 | What is the quality of the climate matching data?                                                                                                                       | Medium   | C. gibelio has a wide range and therefore the SC region is somewhat in a suitable climatic zone.                                                                                                                                                                                                                                                                                                                                                                      | Medium     |
| 6                                              | 2.03 | Is the taxon already present outside of captivity in the RA area?                                                                                                       | Yes      | Carassius gibelio is widespread throughout South Caucasus Region and present in the ponds, lakes, rivers and reservoirs of the region (Japoshvili et al. 2013; Ninua et al. 2013; Kuljanishvili et                                                                                                                                                                                                                                                                    | Very high  |
| 7                                              | 2.04 | How many potential vectors could the taxon use to enter in the RA area?                                                                                                 | > 1      | This fish is spread by both intentional by humans and unintentional by animals (birds, mammals, etc.)                                                                                                                                                                                                                                                                                                                                                                 | High       |
| 8                                              | 2.05 | Is the taxon currently found in close proximity to, and likely to enter into, the RA area in the near future (e.g. unintentional and intentional introductions)?        | Yes      | This species is widely distributed in the Caucasus region and surrounding.                                                                                                                                                                                                                                                                                                                                                                                            | Very high  |
| 3. Invasive elsewhere                          |      |                                                                                                                                                                         |          |                                                                                                                                                                                                                                                                                                                                                                                                                                                                       |            |
| 9                                              | 3.01 | Has the taxon become naturalised (established viable populations) outside its native range?                                                                             | Yes      | This species has been successfully established in many countries around the world (Japoshvili et al. 2013; Japoshvili et al. 2017; Yerli et al. 2014; Kuljanishvili et al. 2020; FAO 2021).                                                                                                                                                                                                                                                                           | Very high  |
| 10                                             | 3.02 | In the taxon's introduced range, are there known adverse impacts to wild stocks or commercial taxa?                                                                     | Yes      | The species has negative impact on the local populations (Tarkan et al. 2012; Ruppert et al. 2017).                                                                                                                                                                                                                                                                                                                                                                   | High       |
| 11                                             | 3.03 | In the taxon's introduced range, are there known adverse impacts to aquaculture?                                                                                        | Yes      | In aquaculture systems, C. gibelio is an unwelcome competitor with cultures of the major reared species. The occurrence of numerous populations of C. gibelio in fishponds causes considerable economic loss in the Czech Republic as there is no market for the species. Even when it can be sold, it reaches a considerably lower price (Lusková et al., 2010).                                                                                                     | Very high  |
| 12                                             | 3.04 | In the taxon's introduced range, are there known adverse impacts to ecosystem                                                                                           | Yes      | This species affect nutrient recycling and then primary productivity in aquatic ecosystems, either directly or indirectly                                                                                                                                                                                                                                                                                                                                             | Very high  |
| 13                                             | 3.05 | In the taxon's introduced range, are there known adverse socio-economic impacts?                                                                                        | Yes      | In Europe economic impact (on agriculture, animal production, forestry, human infrastructure, human health and human social life) caused by C. gibelio has been assessed and scored the highest impact points (Veer & Nentwig 2014).                                                                                                                                                                                                                                  | Very high  |
| B. Biology/Ecology                             |      |                                                                                                                                                                         |          |                                                                                                                                                                                                                                                                                                                                                                                                                                                                       |            |
| 4. Undesirable (or persistence) traits         |      |                                                                                                                                                                         |          |                                                                                                                                                                                                                                                                                                                                                                                                                                                                       |            |
| 14                                             | 4.01 | Is it likely that the taxon will be poisonous or pose other risks to human health?                                                                                      | No       | No such fact has been revealed.                                                                                                                                                                                                                                                                                                                                                                                                                                       | High       |
| 15                                             | 4.02 | Is it likely that the taxon will smother one or more native taxa (that are not threatened or protected)?                                                                | Yes      | Declines of toppredators/piscivorous fish such as native trout speciesand European catfish (S. glanis) and reduced compe-tition for food by the rest of the species may further favored the explosion of C. gibelio populations in Greece (Perdikaris et al.                                                                                                                                                                                                          | High       |
| 16                                             | 4.03 | Are there any threatened or protected taxa that the non-native taxon would parasitise in the RA area?                                                                   | Yes      | In the SC region there are many protected and thretend species who are under pressure from this species, e.g. Luciobarbus capito, L. mursa, Acipencer spp, etc. (Ninua et al. 2013; Kuljanishvili et                                                                                                                                                                                                                                                                  | Very high  |
| 17                                             | 4.04 | Is the taxon adaptable in terms of climatic and other environmental conditions, thus enhancing its potential persistence if it has invaded or could invade the RA area? | Yes      | This species has been successfully established in the region and consequently it has overcome all barriers.                                                                                                                                                                                                                                                                                                                                                           | Very high  |
| 18                                             | 4.05 | Is the taxon likely to disrupt food-web structure/function in aquatic ecosystems if it has invaded or is likely to invade the RA area?                                  | Yes      | C. gibelio has potential to cause economic and environmental damage by causing quantitative changes in community structure in becoming the dominant species and shifts in food chains, and bv altering the physical and chemical properties of habitats                                                                                                                                                                                                               | High       |

|                                 |      |                                                                                                                                                                    |                |                                                                                                                                                                                                                                                                                                                                                                                                                                                                                                                                                                                |           |
|---------------------------------|------|--------------------------------------------------------------------------------------------------------------------------------------------------------------------|----------------|--------------------------------------------------------------------------------------------------------------------------------------------------------------------------------------------------------------------------------------------------------------------------------------------------------------------------------------------------------------------------------------------------------------------------------------------------------------------------------------------------------------------------------------------------------------------------------|-----------|
| 19                              | 4.06 | Is the taxon likely to exert adverse impacts on ecosystem services in the RA area?                                                                                 | Yes            | A similar fact is likely to occur as this species interferes with the reproduction of local fish populations.                                                                                                                                                                                                                                                                                                                                                                                                                                                                  | Medium    |
| 20                              | 4.07 | Is it likely that the taxon will host, and/or act as a vector for, recognised pests and infectious agents that are endemic in the RA area?                         | Not applicable | No such data available.                                                                                                                                                                                                                                                                                                                                                                                                                                                                                                                                                        | Low       |
| 21                              | 4.08 | Is it likely that the taxon will host, and/or act as a vector for, recognised pests and infectious agents that are absent from (novel to) the RA area?             | Not applicable | No such data available.                                                                                                                                                                                                                                                                                                                                                                                                                                                                                                                                                        | Low       |
| 22                              | 4.09 | Is it likely that the taxon will achieve a body size that will make it more likely to be released from captivity?                                                  | Yes            | C. gibelio is a medium-sized cyprinid, and can grow up to 3 kilograms and a length of 45 centimetres. Therefore, it can be released from captivity in the nature for angling.                                                                                                                                                                                                                                                                                                                                                                                                  | High      |
| 23                              | 4.10 | Is the taxon capable of sustaining itself in a range of water velocity conditions (e.g. versatile in habitat use)?                                                 | Yes            | Inhabits a wide variety of still water bodies and lowland rivers, usually associated with submerged vegetation or regular flooding.                                                                                                                                                                                                                                                                                                                                                                                                                                            | High      |
| 24                              | 4.11 | Is it likely that the taxon's mode of existence (e.g. excretion of by-products) or behaviours (e.g. feeding) will reduce habitat quality for native taxa?          | Yes            | The presence of C. gibelio in some habitats increased the biomass of planktonic algae, total and inorganic suspended solids, leading to decreased light intensity in the water and a lower biomass of benthic algae (Razlutskiy et al. 2021).                                                                                                                                                                                                                                                                                                                                  | High      |
| 25                              | 4.12 | Is the taxon likely to maintain a viable population even when present in low densities (or persisting in adverse conditions by way of a dormant form)?             | Yes            | Successful adaptation and proliferation of Carassius gibelio is mainly attributed to its dual reproductive mode (alogynogenetic and gonochoristic), the opportunistic-omnivorous feeding habits and the ability to withstand and flourish in adverse ecological conditions. Accordingly, it exerts competitive, as well as destructive effects upon the indigenous fish species (sperm parasitism, antagonism for food, spawning grounds and spawning substrates) and therefore, efforts are needed to sustain a relative balance of the populations (Perdikaris et al. 2011). | High      |
| <b>5. Resource exploitation</b> |      |                                                                                                                                                                    |                |                                                                                                                                                                                                                                                                                                                                                                                                                                                                                                                                                                                |           |
| 26                              | 5.01 | Is the taxon likely to consume threatened or protected native taxa in the RA area?                                                                                 | Yes            | Such a fact has not been documented though it is to be expected                                                                                                                                                                                                                                                                                                                                                                                                                                                                                                                | Medium    |
| 27                              | 5.02 | Is the taxon likely to sequester food resources (including nutrients) to the detriment of native taxa in the RA area?                                              | Yes            | Such a fact has not been documented though it is to be expected                                                                                                                                                                                                                                                                                                                                                                                                                                                                                                                | Medium    |
| <b>6. Reproduction</b>          |      |                                                                                                                                                                    |                |                                                                                                                                                                                                                                                                                                                                                                                                                                                                                                                                                                                |           |
| 28                              | 6.01 | Is the taxon likely to exhibit parental care and/or to reduce age-at-maturity in response to environmental conditions?                                             | Yes            | Relative density, duration of spawning, reproductive effort and gonado-somatic index of C. gibelio increased with some water quality variables and coincided with decreasing trends for natives (Tarkan et al. 2012).                                                                                                                                                                                                                                                                                                                                                          | High      |
| 29                              | 6.02 | Is the taxon likely to produce viable gametes or propagules (in the RA area)?                                                                                      | Yes            | This species is successfully breeding in the SC region (Japoshvili et al. 2013; Kuljanishvili et al. 2020).                                                                                                                                                                                                                                                                                                                                                                                                                                                                    | Very high |
| 30                              | 6.03 | Is the taxon likely to hybridise naturally with native taxa?                                                                                                       | Yes            | C. gibelio are very similar to other members of the Carassius genus, Cyprinus carpio and hybrids of these species.                                                                                                                                                                                                                                                                                                                                                                                                                                                             | Very high |
| 31                              | 6.04 | Is the taxon likely to be hermaphroditic or to display asexual reproduction?                                                                                       | Yes            | This species is characterized by asexual reproduction (Japoshvili et al. 2013; Yadrenkina 2020).                                                                                                                                                                                                                                                                                                                                                                                                                                                                               | Very high |
| 32                              | 6.05 | Is the taxon dependent on the presence of another taxon (or specific habitat features) to complete its life cycle?                                                 | No             | Such a fact is not known                                                                                                                                                                                                                                                                                                                                                                                                                                                                                                                                                       | Medium    |
| 33                              | 6.06 | Is the taxon known (or likely) to produce a large number of propagules or offspring within a short time span (e.g. < 1 year)?                                      | Yes            | Fecundity of this species is about 300 000 eggs (Ninua et al. 2013).                                                                                                                                                                                                                                                                                                                                                                                                                                                                                                           | High      |
| 34                              | 6.07 | How many time units (days, months, years) does the taxon require to reach the age-at-first-reproduction?                                                           | 4              | Sexually mature at the age of 4 (Ninua et al. 2013).                                                                                                                                                                                                                                                                                                                                                                                                                                                                                                                           | High      |
| <b>7. Dispersal mechanisms</b>  |      |                                                                                                                                                                    |                |                                                                                                                                                                                                                                                                                                                                                                                                                                                                                                                                                                                |           |
| 35                              | 7.01 | How many potential internal vectors/pathways could the taxon use to disperse within the RA area (with suitable)?                                                   | > 1            | Carassius gibelio is widespread species in the throughout Caucasus region. This species is spreading both intentionally and accidentally by humans, birds, other animals and etc.                                                                                                                                                                                                                                                                                                                                                                                              | Very high |
| 36                              | 7.02 | Will any of these vectors/pathways bring the taxon in close proximity to one or more protected areas (e.g. MCZ, MPA, SSSI)?                                        | Yes            | This species is occurring in the protected areas of the SC region for example in the Kolkheti National Park, west Georgia.                                                                                                                                                                                                                                                                                                                                                                                                                                                     | High      |
| 37                              | 7.03 | Does the taxon have a means of actively attaching itself to hard substrata (e.g. ship hulls, pilings, buoys) such that it enhances the likelihood of dispersal?    | No             | Such a fact is not known                                                                                                                                                                                                                                                                                                                                                                                                                                                                                                                                                       | Low       |
| 38                              | 7.04 | Is natural dispersal of the taxon likely to occur as eggs (for animals) or as propagules (for plants: seeds, spores) in the RA area?                               | Yes            | This species can spread by birds and other organisms.                                                                                                                                                                                                                                                                                                                                                                                                                                                                                                                          | High      |
| 39                              | 7.05 | Is natural dispersal of the taxon likely to occur as larvae/juveniles (for animals) or as fragments/seedlings (for plants) in the RA area?                         | Not applicable | Such a fact is not known                                                                                                                                                                                                                                                                                                                                                                                                                                                                                                                                                       | Low       |
| 40                              | 7.06 | Are older life stages of the taxon likely to migrate in the RA area for reproduction?                                                                              | No             | This species is not characterized by migration.                                                                                                                                                                                                                                                                                                                                                                                                                                                                                                                                | Medium    |
| 41                              | 7.07 | Are propagules or eggs of the taxon likely to be dispersed in the RA area by other animals?                                                                        | Yes            | This species can spread by birds and other organisms in the SC region.                                                                                                                                                                                                                                                                                                                                                                                                                                                                                                         | Very high |
| 42                              | 7.08 | Is dispersal of the taxon along any of the vectors/pathways mentioned in the previous seven questions (35–41; i.e. both unintentional or intentional) likely to be | Yes            | A similar fact is likely to happen.                                                                                                                                                                                                                                                                                                                                                                                                                                                                                                                                            | Medium    |
| 43                              | 7.09 | Is dispersal of the taxon density dependent?                                                                                                                       | Yes            | C. gibelio by its high reproduction capacity by means of gynogenesis and tolerance to environmental changes, considered as a successful invasive. It can become the dominant species in new habitat in a short time with the help of these attributes (Yerli                                                                                                                                                                                                                                                                                                                   | Medium    |
| <b>8. Tolerance attributes</b>  |      |                                                                                                                                                                    |                |                                                                                                                                                                                                                                                                                                                                                                                                                                                                                                                                                                                |           |

|    |      |                                                                                                                                                                              |     |                                                                                                                                                                                                                                                                                                                                                                                      |           |
|----|------|------------------------------------------------------------------------------------------------------------------------------------------------------------------------------|-----|--------------------------------------------------------------------------------------------------------------------------------------------------------------------------------------------------------------------------------------------------------------------------------------------------------------------------------------------------------------------------------------|-----------|
| 44 | 8.01 | Is the taxon able to withstand being out of water for extended periods (e.g. minimum of one or more hours) at some stage of its life cycle?                                  | Yes | C. gibelio has ability to withstand without water for several hours.                                                                                                                                                                                                                                                                                                                 | High      |
| 45 | 8.02 | Is the taxon tolerant of a wide range of water quality conditions relevant to that taxon? [In the Justification field, indicate the relevant water quality variable(s) being | Yes | Inhabits a wide variety of still water bodies and lowland rivers, usually associated with submerged vegetation or regular flooding. Can strongly tolerate low oxygen concentrations and pollution (Kottelat and Freyhof, 2007).                                                                                                                                                      | High      |
| 46 | 8.03 | Can the taxon be controlled or eradicated in the wild with chemical, biological, or other agents/means?                                                                      | No  | Data on this are not available.                                                                                                                                                                                                                                                                                                                                                      | Low       |
| 47 | 8.04 | Is the taxon likely to tolerate or benefit from environmental/human disturbance?                                                                                             | Yes | Climate, habitat and human disturbance were closely related to the life history, suggesting that C. gibelio will expand their distribution in response to future global environmental changes                                                                                                                                                                                        | Medium    |
| 48 | 8.05 | Is the taxon able to tolerate salinity levels that are higher or lower than those found in its usual environment?                                                            | No  | This species is able to persist in low-salinity environments (<10 ppt) for long periods of time and at higher salinities for short time periods. When acutely shifted from fresh water to low-salinity conditions (5-15 ppt) the species is capable of survival for at least 72 h. However, acute transfer to salinities of 20-25 ppt lead to 100% mortality (Schofield et al. 2006) | High      |
| 49 | 8.06 | Are there effective natural enemies (predators) of the taxon present in the RA                                                                                               | Yes | Esox lucius, Silurus glanis, Salmo labrax, etc. (Kuljanishvili et al. 2020).                                                                                                                                                                                                                                                                                                         | Very high |

#### C. Climate change

##### 9. Climate change

|    |      |                                                                                                                                                              |          |               |        |
|----|------|--------------------------------------------------------------------------------------------------------------------------------------------------------------|----------|---------------|--------|
| 50 | 9.01 | Under the predicted future climatic conditions, are the risks of entry into the RA area posed by the taxon likely to increase, decrease or not change?       | Increase | Own judgement | High   |
| 51 | 9.02 | Under the predicted future climatic conditions, are the risks of establishment posed by the taxon likely to increase, decrease or not change?                | Increase | Own judgement | High   |
| 52 | 9.03 | Under the predicted future climatic conditions, are the risks of dispersal within the RA area posed by the taxon likely to increase, decrease or not change? | Increase | Own judgement | High   |
| 53 | 9.04 | Under the predicted future climatic conditions, what is the likely magnitude of future potential impacts on biodiversity and/or ecological integrity/status? | Higher   | Own judgement | Medium |
| 54 | 9.05 | Under the predicted future climatic conditions, what is the likely magnitude of future potential impacts on ecosystem structure and/or function?             | Higher   | Own judgement | Medium |
| 55 | 9.06 | Under the predicted future climatic conditions, what is the likely magnitude of future potential impacts on ecosystem services/socio-economic factors?       | Higher   | Own judgement | Low    |

| Statistics                                     |             |
|------------------------------------------------|-------------|
| Scores                                         |             |
| <b>BRA</b>                                     | <b>52.0</b> |
| <b>BRA Outcome</b>                             | <b>-</b>    |
| <b>BRA+CCA</b>                                 | <b>64.0</b> |
| <b>BRA+CCA Outcome</b>                         | <b>-</b>    |
| Score partition                                |             |
| <b>A. Biogeography/Historical</b>              | <b>24.0</b> |
| 1. Domestication/Cultivation                   | 4.0         |
| 2. Climate, distribution and introduction risk | 2.0         |
| 3. Invasive elsewhere                          | 18.0        |
| <b>B. Biology/Ecology</b>                      | <b>28.0</b> |
| 4. Undesirable (or persistence) traits         | 9.0         |
| 5. Resource exploitation                       | 7.0         |
| 6. Reproduction                                | 5.0         |
| 7. Dispersal mechanisms                        | 3.0         |
| 8. Tolerance attributes                        | 4.0         |
| <b>C. Climate change</b>                       | <b>12.0</b> |
| 9. Climate change                              | 12.0        |
| Answered Questions                             |             |
| <b>Total</b>                                   | <b>55</b>   |
| <b>A. Biogeography/Historical</b>              | <b>13</b>   |
| 1. Domestication/Cultivation                   | 3           |
| 2. Climate, distribution and introduction risk | 5           |
| 3. Invasive elsewhere                          | 5           |
| <b>B. Biology/Ecology</b>                      | <b>36</b>   |
| 4. Undesirable (or persistence) traits         | 12          |
| 5. Resource exploitation                       | 2           |
| 6. Reproduction                                | 7           |
| 7. Dispersal mechanisms                        | 9           |
| 8. Tolerance attributes                        | 6           |
| <b>C. Climate change</b>                       | <b>6</b>    |
| 9. Climate change                              | 6           |
| Sectors affected                               |             |
| <b>Commercial</b>                              | <b>21</b>   |
| <b>Environmental</b>                           | <b>17</b>   |

|                                       |    |
|---------------------------------------|----|
| Species or population nuisance traits | 31 |
|---------------------------------------|----|

| Thresholds |  |      |
|------------|--|------|
| BRA        |  | -    |
| BRA+CCA    |  | -    |
| Confidence |  |      |
| BRA+CCA    |  | 0.72 |
| BRA        |  | 0.73 |
| CCA        |  | 0.58 |

| Date and Time       |  |
|---------------------|--|
| 03/05/2022 13:41:54 |  |

AS-ISK v2

| Taxon and Assessor details         |                                                                                                                             |
|------------------------------------|-----------------------------------------------------------------------------------------------------------------------------|
| Category                           | Fishes and Lampreys (freshwater)                                                                                            |
| Taxon name                         | <i>Carassius gibelio</i>                                                                                                    |
| Common name                        | gibel carp                                                                                                                  |
| Assessor                           | Tatia Kuljanishvili                                                                                                         |
| Risk screening context             |                                                                                                                             |
| Reason and socio-economic benefits | Prussian carp, <i>Carassius gibelio</i> (Bloch, 1782), has spread outside its native range and has                          |
| Risk assessment area               | South Caucasus                                                                                                              |
| Taxonomy                           | Actinopterygii (ray-finned fishes) Cypriniformes (Carps) Cyprinidae (Minnows or carps) Cyprininae                           |
| Native range                       | Europe and Asia: usually considered as native from central Europe to Siberia or introduced to                               |
| Introduced range                   | At present, widely distributed and commonly stocked together with <i>Cyprinus carpio</i> which is                           |
| URL                                | <a href="https://www.fishbase.de/summary/Carassius-gibelio.html">https://www.fishbase.de/summary/Carassius-gibelio.html</a> |

|                                                |      |                                                                                                                                                                  | Response | Justification (references and/or other information)                                                                                                                                                                                                                                                                                                                                                                                                                                                                                                                                                                                                                                                                                                                                                                                                                 | Confidence |
|------------------------------------------------|------|------------------------------------------------------------------------------------------------------------------------------------------------------------------|----------|---------------------------------------------------------------------------------------------------------------------------------------------------------------------------------------------------------------------------------------------------------------------------------------------------------------------------------------------------------------------------------------------------------------------------------------------------------------------------------------------------------------------------------------------------------------------------------------------------------------------------------------------------------------------------------------------------------------------------------------------------------------------------------------------------------------------------------------------------------------------|------------|
| A. Biogeography/Historical                     |      |                                                                                                                                                                  |          |                                                                                                                                                                                                                                                                                                                                                                                                                                                                                                                                                                                                                                                                                                                                                                                                                                                                     |            |
| 1. Domestication/Cultivation                   |      |                                                                                                                                                                  |          |                                                                                                                                                                                                                                                                                                                                                                                                                                                                                                                                                                                                                                                                                                                                                                                                                                                                     |            |
| 1                                              | 1.01 | Has the taxon been the subject of domestication (or cultivation) for at least 20 generations?                                                                    | Yes      | Carassius gibelio is considered as C. auratus complex, which means that species of C. auratus complex are very difficult to distinguish from each other in the wild. This group includes the most popular aquarium fish - goldfish (Rylkova et al 2013). Carassius gibelio itself is considered as a weed fish and it does not have economic benefits. Therefore it is not deliberately grown in fish farms or is subjected to substantial human selection. However, fish farming is mostly the case how this species is                                                                                                                                                                                                                                                                                                                                            | Very high  |
| 2                                              | 1.02 | Is the taxon harvested in the wild and likely to be sold or used in its live form?                                                                               | No       | The species was being introduced to some countries as a bait fish for other aquaculture fish (Lever 1996) however, this species is not harvested, sold or consumed nowadays.                                                                                                                                                                                                                                                                                                                                                                                                                                                                                                                                                                                                                                                                                        | High       |
| 3                                              | 1.03 | Does the taxon have invasive races, varieties, sub-taxa or congeners?                                                                                            | Yes      | Carassius auratus very closely related invasive species.                                                                                                                                                                                                                                                                                                                                                                                                                                                                                                                                                                                                                                                                                                                                                                                                            | Very high  |
| 2. Climate, distribution and introduction risk |      |                                                                                                                                                                  |          |                                                                                                                                                                                                                                                                                                                                                                                                                                                                                                                                                                                                                                                                                                                                                                                                                                                                     |            |
| 4                                              | 2.01 | How similar are the climatic conditions of the Risk Assessment (RA) area and the taxon's native range?                                                           | High     | If we count that the native area of Carassius gibelio is Siberia/Asia then climatic conditions are different to those to S. Caucasian area, however, since we do not know what is exact native range of this species, confidence of this answer remains medium.                                                                                                                                                                                                                                                                                                                                                                                                                                                                                                                                                                                                     | Medium     |
| 5                                              | 2.02 | What is the quality of the climate matching data?                                                                                                                | Low      | The quality of the climate data is low since we do not know the exact native range of this species. This can affect the accuracy of the climate analysis.                                                                                                                                                                                                                                                                                                                                                                                                                                                                                                                                                                                                                                                                                                           | High       |
| 6                                              | 2.03 | Is the taxon already present outside of captivity in the RA area?                                                                                                | Yes      | Following citations are the published records of this species appearance in RA area: Daraselia 1985; Japoshvili et al 2013; Japoshvili et al 2017; Kuljanishvili et a; 2018; Kuljanishvili et al                                                                                                                                                                                                                                                                                                                                                                                                                                                                                                                                                                                                                                                                    | Very high  |
| 7                                              | 2.04 | How many potential vectors could the taxon use to enter in the RA area?                                                                                          | >1       | Japoshvili et al 2013 proposed two vectors: unintentional introduction with Cyprinus carpio or spread by the birds, ornamental trade and natural dispersal are also the possible                                                                                                                                                                                                                                                                                                                                                                                                                                                                                                                                                                                                                                                                                    | High       |
| 8                                              | 2.05 | Is the taxon currently found in close proximity to, and likely to enter into, the RA area in the near future (e.g. unintentional and intentional introductions)? | Yes      | This species is established in almost every water body where it occurs (Japoshvili et al 2013; Japoshvili et al 2017; Kuljanishvili et al 2020)                                                                                                                                                                                                                                                                                                                                                                                                                                                                                                                                                                                                                                                                                                                     | Very high  |
| 3. Invasive elsewhere                          |      |                                                                                                                                                                  |          |                                                                                                                                                                                                                                                                                                                                                                                                                                                                                                                                                                                                                                                                                                                                                                                                                                                                     |            |
| 9                                              | 3.01 | Has the taxon become naturalised (established viable populations) outside its                                                                                    | Yes      | It is known that this species have been naturalised in Europe since 19th century (See: Rylkova et al 2013).                                                                                                                                                                                                                                                                                                                                                                                                                                                                                                                                                                                                                                                                                                                                                         | Very high  |
| 10                                             | 3.02 | In the taxon's introduced range, are there known adverse impacts to wild stocks or commercial taxa?                                                              | Yes      | Carassius gibelio is recognized as one of the most successful invasive fish worldwide (Copp et al 2005; Gozlan et al 2010). It has negative impact on environment, in which it is introduced due to foraging behaviour and usual high abundances (Vetemaa et al 2005; Lusková et al 2010). Presence of Prussian carp populations increases turbidity (Crivelli, 1995) and leads to a change in the nutrient cycle (Paulovits et al., 1998). Additionally, Prussian carp affects native species including plants and animals in terms of grazing pressure and impacts on other fish by direct competition (Gaygusuz et al., 2007; Ribeiro and Leunda, 2012; Tarkan et al. 2012; Ruppert et al. 2017). As with other non-native species, Prussian carp may cause the introduction of uncommon parasites and diseases in newly invaded areas (Žitňan, 1974; Mahmoud et | Very high  |
| 11                                             | 3.03 | In the taxon's introduced range, are there known adverse impacts to aquaculture?                                                                                 | No       | There are no studies or assessments done in RA area regarding C. gibelio adverse impacts to aquaculture. However, based on other area assessments we can say that it can negatively affect the productivity in the pond aquaculture, since its ability to change nutrient cycle, grazing pressure and competition.                                                                                                                                                                                                                                                                                                                                                                                                                                                                                                                                                  | Medium     |
| 12                                             | 3.04 | In the taxon's introduced range, are there known adverse impacts to ecosystem services?                                                                          | Yes      | Impacts all types of ecosystem services (in water). 1) Affects water quality (Crivelli, 1995; Richardson et al 1995); 2) can be transmitting diseases (Žitňan, 1974; Mahmoud et al 2009); 3)distrupts nutrient cycles in water (Paulovits et al 1998); 4) is not used in recreational fisheries.                                                                                                                                                                                                                                                                                                                                                                                                                                                                                                                                                                    | Very high  |
| 13                                             | 3.05 | In the taxon's introduced range, are there known adverse socio-economic impacts?                                                                                 | No       | Does not have any known consequences on commercial or recreational fisheries or aquaculture.                                                                                                                                                                                                                                                                                                                                                                                                                                                                                                                                                                                                                                                                                                                                                                        | Medium     |
| B. Biology/Ecology                             |      |                                                                                                                                                                  |          |                                                                                                                                                                                                                                                                                                                                                                                                                                                                                                                                                                                                                                                                                                                                                                                                                                                                     |            |
| 4. Undesirable (or persistence) traits         |      |                                                                                                                                                                  |          |                                                                                                                                                                                                                                                                                                                                                                                                                                                                                                                                                                                                                                                                                                                                                                                                                                                                     |            |
| 14                                             | 4.01 | Is it likely that the taxon will be poisonous or pose other risks to human health?                                                                               | No       | Not known                                                                                                                                                                                                                                                                                                                                                                                                                                                                                                                                                                                                                                                                                                                                                                                                                                                           | Very high  |
| 15                                             | 4.02 | Is it likely that the taxon will smother one or more native taxa (that are not threatened or protected)?                                                         | Yes      | C. gibelio can cause the decline of native fish in the environment due to it's invasive behaviour, which includes, competition, habitat quality changes, sperm parasitism (Deacon et al. 1964,                                                                                                                                                                                                                                                                                                                                                                                                                                                                                                                                                                                                                                                                      | High       |

|                                 |      |                                                                                                                                                                         |     |                                                                                                                                                                                                                                                                                                                                                       |           |
|---------------------------------|------|-------------------------------------------------------------------------------------------------------------------------------------------------------------------------|-----|-------------------------------------------------------------------------------------------------------------------------------------------------------------------------------------------------------------------------------------------------------------------------------------------------------------------------------------------------------|-----------|
| 16                              | 4.03 | Are there any threatened or protected taxa that the non-native taxon would parasitise in the RA area?                                                                   | No  | This species is omnivorous. Is not characterised with parasitism and is not being a predator.                                                                                                                                                                                                                                                         | High      |
| 17                              | 4.04 | Is the taxon adaptable in terms of climatic and other environmental conditions, thus enhancing its potential persistence if it has invaded or could invade the RA area? | Yes | The species ability to tolerate degraded conditions in different environment makes this species invasive (Morgan 2007).                                                                                                                                                                                                                               | High      |
| 18                              | 4.05 | Is the taxon likely to disrupt food-web structure/function in aquatic ecosystems if it has invaded or is likely to invade the RA area?                                  | Yes | It can disrupt food-web structure via eating-out zooplankton (See Paulovits et al 1998)                                                                                                                                                                                                                                                               | High      |
| 19                              | 4.06 | Is the taxon likely to exert adverse impacts on ecosystem services in the RA area?                                                                                      | Yes | Can affect water quality, can be transmitting diseases, disrupts nutrient cycles in water, and recreational fisheries are being impacted as this species is not local anglers favourite.                                                                                                                                                              | High      |
| 20                              | 4.07 | Is it likely that the taxon will host, and/or act as a vector for, recognised pests and infectious agents that are endemic in the RA area?                              | Yes | There is no information about endemic pests and infectious agents in the region                                                                                                                                                                                                                                                                       | Low       |
| 21                              | 4.08 | Is it likely that the taxon will host, and/or act as a vector for, recognised pests and infectious agents that are absent from (novel to) the RA area?                  | Yes | Carassius gibelio might bring of uncommon parasites and diseases in newly invaded areas (Žitňan, 1974; Mahmoud et al 2009).                                                                                                                                                                                                                           | Medium    |
| 22                              | 4.09 | Is it likely that the taxon will achieve a body size that will make it more likely to be released from captivity?                                                       | Yes | The fish grows up to 30cm (at least what is recorded) in the RA area (Japoshvili et al 2017). If held in captivity, it is more likely to be released into nature due to it's achieved size.                                                                                                                                                           | High      |
| 23                              | 4.10 | Is the taxon capable of sustaining itself in a range of water velocity conditions (e.g. versatile in habitat use)?                                                      | Yes | Recently this fish has been found in flowing waters as well.                                                                                                                                                                                                                                                                                          | High      |
| 24                              | 4.11 | Is it likely that the taxon's mode of existence (e.g. excretion of by-products) or behaviours (e.g. feeding) will reduce habitat quality for native taxa?               | Yes | Several studies document it's foraging behaviour, leading the decrease of habitat quality and decline of native species                                                                                                                                                                                                                               | High      |
| 25                              | 4.12 | Is the taxon likely to maintain a viable population even when present in low densities (or persisting in adverse conditions by way of a dormant form)?                  | Yes | This species is known that can be reproducing by Parthenogenesis (Gui and Zhou, 2010).. Meaning that it can quickly reproduce even in low densities.                                                                                                                                                                                                  | Very high |
| <b>5. Resource exploitation</b> |      |                                                                                                                                                                         |     |                                                                                                                                                                                                                                                                                                                                                       |           |
| 26                              | 5.01 | Is the taxon likely to consume threatened or protected native taxa in the RA area?                                                                                      | No  | There is expectation that it can consume some threatened benthic invertebrates. However, local IUCN lists are not updated and it is difficult to say which local organisms it can affect. Secondly, C. gibelio is not a predatory fish, that means that it can not consume threatened fishes. Thus, answer will be NO, but with Medium confidence     | Medium    |
| 27                              | 5.02 | Is the taxon likely to sequester food resources (including nutrients) to the detriment of native taxa in the RA area?                                                   | Yes | It is known that the C. gibelio or its closely related taxa (C. carassius; C. auratus) impact the nutrient cycle and food resources availability for native organisms (Paulovits et al 1998; He et al 2017; He et al 2019; Jia et al 2019).                                                                                                           | Medium    |
| <b>6. Reproduction</b>          |      |                                                                                                                                                                         |     |                                                                                                                                                                                                                                                                                                                                                       |           |
| 28                              | 6.01 | Is the taxon likely to exhibit parental care and/or to reduce age-at-maturity in response to environmental conditions?                                                  | No  | It is not known.                                                                                                                                                                                                                                                                                                                                      | High      |
| 29                              | 6.02 | Is the taxon likely to produce viable gametes or propagules (in the RA area)?                                                                                           | Yes | It has produced viable propagules.                                                                                                                                                                                                                                                                                                                    | Very high |
| 30                              | 6.03 | Is the taxon likely to hybridise naturally with native taxa?                                                                                                            | Yes | It might hybridize with Cyprinus carpio (Simkova et al 2015)                                                                                                                                                                                                                                                                                          | Medium    |
| 31                              | 6.04 | Is the taxon likely to be hermaphroditic or to display asexual reproduction?                                                                                            | Yes | Yes it has ability to reproduce asexually as well, that has been documented using several studies.                                                                                                                                                                                                                                                    | Very high |
| 32                              | 6.05 | Is the taxon dependent on the presence of another taxon (or specific habitat features) to complete its life cycle?                                                      | No  | C gibelio sometimes uses the sperm of other species of the same genus to trigger its clonal reproduction (Sperm dependent parthenogenesis). However, if there is not availability of heterospecific sperm, they produce recombinant offspring of both sexes. Which indicates that they are not dependent on another taxon to complete its life cycle. | High      |
| 33                              | 6.06 | Is the taxon known (or likely) to produce a large number of propagules or offspring within a short time span (e.g. < 1 year)?                                           | No  | Not recorded                                                                                                                                                                                                                                                                                                                                          | High      |
| 34                              | 6.07 | How many time units (days, months, years) does the taxon require to reach the age-at-first-reproduction?                                                                | 2   | Age at maturity is 3-4 years in central and eastern europe; 1-2 years in southern Europe (Kottelat & Freyhof, 2007).                                                                                                                                                                                                                                  | Medium    |
| <b>7. Dispersal mechanisms</b>  |      |                                                                                                                                                                         |     |                                                                                                                                                                                                                                                                                                                                                       |           |
| 35                              | 7.01 | How many potential internal vectors/pathways could the taxon use to disperse within the RA area (with suitable vectors)?                                                | > 1 | Unintentional releases with other fish species fry (e.g. C. carpio), accidental escapes from fish farms, intentional releases (by hobbyists).                                                                                                                                                                                                         | High      |
| 36                              | 7.02 | Will any of these vectors/pathways bring the taxon in close proximity to one or more protected areas (e.g. MCZ, MPA, SSSI)?                                             | Yes | Like written above, C. gibelio appears in flowing waters, making this species highly mobile for further dispersal. It has reached protected areas as well.                                                                                                                                                                                            | Very high |
| 37                              | 7.03 | Does the taxon have a means of actively attaching itself to hard substrata (e.g. ship hulls, pilings, buoys) such that it enhances the likelihood of dispersal?         | No  | C. gibelio produces "sticky eggs that are attached to water plants or, submerged objects" (Kottelat and Freyhof 2007). However, can it be transported by ships, hulls pilings, buoys? less likely.                                                                                                                                                    | High      |
| 38                              | 7.04 | Is natural dispersal of the taxon likely to occur as eggs (for animals) or as propagules (for plants: seeds, spores) in the RA area?                                    | Yes | Japoshvili et al. 2013 reported that the eggs of Carassius gibelio was believed to be introduced through birds in Georgia. However, it is less likely.                                                                                                                                                                                                | Low       |
| 39                              | 7.05 | Is natural dispersal of the taxon likely to occur as larvae/juveniles (for animals) or as fragments/seedlings (for plants) in the RA area?                              | No  | There is no documentation of natural dispersal of this species larvae or juveniles                                                                                                                                                                                                                                                                    | High      |

|                                |      |                                                                                                                                                                              |                |                                                                                                                                                                                                                                                                                                                                                                                                                                                                                                                                                                                                                                                                                           |           |
|--------------------------------|------|------------------------------------------------------------------------------------------------------------------------------------------------------------------------------|----------------|-------------------------------------------------------------------------------------------------------------------------------------------------------------------------------------------------------------------------------------------------------------------------------------------------------------------------------------------------------------------------------------------------------------------------------------------------------------------------------------------------------------------------------------------------------------------------------------------------------------------------------------------------------------------------------------------|-----------|
| 40                             | 7.06 | Are older life stages of the taxon likely to migrate in the RA area for reproduction?                                                                                        | Not applicable | Does not migrate for reproduction                                                                                                                                                                                                                                                                                                                                                                                                                                                                                                                                                                                                                                                         | High      |
| 41                             | 7.07 | Are propagules or eggs of the taxon likely to be dispersed in the RA area by other animals?                                                                                  | Yes            | This species occurs in natural lakes, which serve as an important areas for water birds (e.i Javakheti upland lakes). Its eggs could be transported by birds, but less likely.                                                                                                                                                                                                                                                                                                                                                                                                                                                                                                            | Medium    |
| 42                             | 7.08 | Is dispersal of the taxon along any of the vectors/pathways mentioned in the previous seven questions (35–41; i.e. both unintentional or intentional) likely to be           | Yes            | In some urban ponds, accidentally introduced <i>C. gibelio</i> reproduces and disperses very rapidly (one calendar year)                                                                                                                                                                                                                                                                                                                                                                                                                                                                                                                                                                  | High      |
| 43                             | 7.09 | Is dispersal of the taxon density dependent?                                                                                                                                 | No             | Not documented                                                                                                                                                                                                                                                                                                                                                                                                                                                                                                                                                                                                                                                                            | High      |
| <b>8. Tolerance attributes</b> |      |                                                                                                                                                                              |                |                                                                                                                                                                                                                                                                                                                                                                                                                                                                                                                                                                                                                                                                                           |           |
| 44                             | 8.01 | Is the taxon able to withstand being out of water for extended periods (e.g. minimum of one or more hours) at some stage of its life cycle?                                  | No             | No. can not withstand being out of water for more than one hour                                                                                                                                                                                                                                                                                                                                                                                                                                                                                                                                                                                                                           | High      |
| 45                             | 8.02 | Is the taxon tolerant of a wide range of water quality conditions relevant to that taxon? [In the Justification field, indicate the relevant water quality variable(s) being | Yes            | Tolerates low oxygen and eutrophic environments                                                                                                                                                                                                                                                                                                                                                                                                                                                                                                                                                                                                                                           | High      |
| 46                             | 8.03 | Can the taxon be controlled or eradicated in the wild with chemical, biological, or other agents/means?                                                                      | No             | There was documented case when <i>C. auratus</i> has been eradicated from the certain areas of the Vasse River via electrofishing and Gill nets ( <a href="https://researchrepository.murdoch.edu.au/id/eprint/5948/1/Feral_Goldfish.pdf">https://researchrepository.murdoch.edu.au/id/eprint/5948/1/Feral_Goldfish.pdf</a> ). However, it is not known if it has been eradicated                                                                                                                                                                                                                                                                                                         | High      |
| 47                             | 8.04 | Is the taxon likely to tolerate or benefit from environmental/human disturbance?                                                                                             | Yes            | Several studies have revealed that <i>C. gibelio</i> is very tolerant to environmental/human disturbance.                                                                                                                                                                                                                                                                                                                                                                                                                                                                                                                                                                                 | Very high |
| 48                             | 8.05 | Is the taxon able to tolerate salinity levels that are higher or lower than those found in its usual environment?                                                            | No             | <i>Carassius gibelio</i> belongs to Stenohaline fishes, that can not tolerate wide variety of salinity. Study done for <i>C. auratus</i> showed that salinities higher than 8-10‰ affects its growth and food intake, results in muscle dehydration and increase of cortisol                                                                                                                                                                                                                                                                                                                                                                                                              | High      |
| 49                             | 8.06 | Are there effective natural enemies (predators) of the taxon present in the RA                                                                                               | No             | There is no such study done in RA area. Therefore, the answer has medium confidence.                                                                                                                                                                                                                                                                                                                                                                                                                                                                                                                                                                                                      | Low       |
| <b>C. Climate change</b>       |      |                                                                                                                                                                              |                |                                                                                                                                                                                                                                                                                                                                                                                                                                                                                                                                                                                                                                                                                           |           |
| <b>9. Climate change</b>       |      |                                                                                                                                                                              |                |                                                                                                                                                                                                                                                                                                                                                                                                                                                                                                                                                                                                                                                                                           |           |
| 50                             | 9.01 | Under the predicted future climatic conditions, are the risks of entry into the RA area posed by the taxon likely to increase, decrease or not change?                       | Increase       | It was hypothesised that climate change might alert the mechanisms of transportation and introduction of non-native species. Commercial and recreational activities will increase, that itself increases the propagule pressure levels of non-native                                                                                                                                                                                                                                                                                                                                                                                                                                      | High      |
| 51                             | 9.02 | Under the predicted future climatic conditions, are the risks of establishment posed by the taxon likely to increase, decrease or not change?                                | Increase       | Increased temperatures will cause this species establish in higher altitudes                                                                                                                                                                                                                                                                                                                                                                                                                                                                                                                                                                                                              | High      |
| 52                             | 9.03 | Under the predicted future climatic conditions, are the risks of dispersal within the RA area posed by the taxon likely to increase, decrease or not change?                 | Increase       | It might favour by environmental changes (caused by climate change) that will increase resource availability, resulting their widespread.                                                                                                                                                                                                                                                                                                                                                                                                                                                                                                                                                 | High      |
| 53                             | 9.04 | Under the predicted future climatic conditions, what is the likely magnitude of future potential impacts on biodiversity and/or ecological integrity/status?                 | Higher         | Population densities will increase making them on one hand impossible to eradicate and on the other hand, affecting native organisms due to competition, that does not leave much resources for native ones.                                                                                                                                                                                                                                                                                                                                                                                                                                                                              | High      |
| 54                             | 9.05 | Under the predicted future climatic conditions, what is the likely magnitude of future potential impacts on ecosystem structure and/or function?                             | Higher         | <i>C. gibelio</i> populations affect the environment in which it is invaded in many terms. Future increased temperatures will favour the dispersal and success of this species establishment which itself, affects native species that are of main concern for conservation. In addition, their foraging behaviour will definitely have impacts on ecosystem structure/function. for example, <i>C. gibelio</i> is known to be changing the nutrient cycle, and can be the reason of increased turbidity in the water body.                                                                                                                                                               | Very high |
| 55                             | 9.06 | Under the predicted future climatic conditions, what is the likely magnitude of future potential impacts on ecosystem services/socio-economic factors?                       | Higher         | In the South Caucasus Area <i>C. gibelio</i> is already well established and distributed in almost all water bodies of different elevations (Kuljanishvili et al 2020). Under the predicted future climatic conditions, this species will disperse even wider, that will itself create the problem for native aquatic organisms and not only. The widespread and abundance of <i>C. gibelio</i> , which is quite adaptive and plastic to different environmental conditions, will increase its impact on ecosystem services and socio-economic factors. For example: water quality; transmission of diseases, disrupting nutrient cycles. It can also affect aquaculture and recreational | Very high |

| Statistics                                     |      |
|------------------------------------------------|------|
| Scores                                         |      |
| BRA                                            | 36.0 |
| BRA Outcome                                    | -    |
| BRA+CCA                                        | 48.0 |
| BRA+CCA Outcome                                | -    |
| Score partition                                |      |
| A. Biogeography/Historical                     | 14.0 |
| 1. Domestication/Cultivation                   | 2.0  |
| 2. Climate, distribution and introduction risk | 2.0  |
| 3. Invasive elsewhere                          | 10.0 |
| B. Biology/Ecology                             | 22.0 |
| 4. Undesirable (or persistence) traits         | 10.0 |
| 5. Resource exploitation                       | 2.0  |
| 6. Reproduction                                | 4.0  |
| 7. Dispersal mechanisms                        | 2.0  |



|                                                |             |
|------------------------------------------------|-------------|
| 8. Tolerance attributes                        | 4.0         |
| <b>C. Climate change</b>                       | <b>12.0</b> |
| 9. Climate change                              | 12.0        |
| <b>Answered Questions</b>                      |             |
| <b>Total</b>                                   | <b>55</b>   |
| <b>A. Biogeography/Historical</b>              | <b>13</b>   |
| 1. Domestication/Cultivation                   | 3           |
| 2. Climate, distribution and introduction risk | 5           |
| 3. Invasive elsewhere                          | 5           |
| <b>B. Biology/Ecology</b>                      | <b>36</b>   |
| 4. Undesirable (or persistence) traits         | 12          |
| 5. Resource exploitation                       | 2           |
| 6. Reproduction                                | 7           |
| 7. Dispersal mechanisms                        | 9           |
| 8. Tolerance attributes                        | 6           |
| <b>C. Climate change</b>                       | <b>6</b>    |
| 9. Climate change                              | 6           |
| <b>Sectors affected</b>                        |             |
| <b>Commercial</b>                              | <b>11</b>   |
| <b>Environmental</b>                           | <b>12</b>   |
| <b>Species or population nuisance traits</b>   | <b>30</b>   |

|                   |             |
|-------------------|-------------|
| <b>Thresholds</b> |             |
| <b>BRA</b>        | -           |
| <b>BRA+CCA</b>    | -           |
| <b>Confidence</b> |             |
| <b>BRA+CCA</b>    | <b>0.75</b> |
| <b>BRA</b>        | <b>0.74</b> |
| <b>CCA</b>        | <b>0.83</b> |

|                      |  |
|----------------------|--|
| <b>Date and Time</b> |  |
| 20/05/2022 16:07:20  |  |

## AS-ISK v2

| Taxon and Assessor details         |                                                                                                                       |
|------------------------------------|-----------------------------------------------------------------------------------------------------------------------|
| Category                           | Fishes and Lampreys (freshwater)                                                                                      |
| Taxon name                         | <i>Chelon auratus</i>                                                                                                 |
| Common name                        | golden grey mullet                                                                                                    |
| Assessor                           | Bella Japoshvili                                                                                                      |
| Risk screening context             |                                                                                                                       |
| Reason and socio-economic benefits | The species have been translocated to the Caspian Sea and have important economic value                               |
| Risk assessment area               | South Caucasus                                                                                                        |
| Taxonomy                           | <a href="https://www.fishbase.de/summary/Chelon-auratus.html">https://www.fishbase.de/summary/Chelon-auratus.html</a> |
| Native range                       | Mediterranean Sea                                                                                                     |
| Introduced range                   | Caspian Sea                                                                                                           |
| URL                                | <a href="https://www.fishbase.de/summary/Chelon-auratus.html">https://www.fishbase.de/summary/Chelon-auratus.html</a> |

|                                                |      | Response                                                                                                                                                                | Justification (references and/or other information) | Confidence                                                                                                                                                                                                                                                                                         |           |
|------------------------------------------------|------|-------------------------------------------------------------------------------------------------------------------------------------------------------------------------|-----------------------------------------------------|----------------------------------------------------------------------------------------------------------------------------------------------------------------------------------------------------------------------------------------------------------------------------------------------------|-----------|
| A. Biogeography/Historical                     |      |                                                                                                                                                                         |                                                     |                                                                                                                                                                                                                                                                                                    |           |
| 1. Domestication/Cultivation                   |      |                                                                                                                                                                         |                                                     |                                                                                                                                                                                                                                                                                                    |           |
| 1                                              | 1.01 | Has the taxon been the subject of domestication (or cultivation) for at least 20 generations?                                                                           | Yes                                                 | Crosetti, D. & Cataudella, S. (1995). The Mulletts (pp. 253-268), In: C.E. Nash, A.J. Novotny (Eds.). World Anim. Sci.-Production of Aquatic Animals (fishes-C8). Elsevier Science, Amsterdam, Netherlands, 529 pp.;                                                                               | Very high |
| 2                                              | 1.02 | Is the taxon harvested in the wild and likely to be sold or used in its live form?                                                                                      | Yes                                                 | Ninua, N., Japoshvili, B., Bochorishvili, V., 2013. Fishes of Georgia. Tsignieri, Tbilisi.                                                                                                                                                                                                         | Very high |
| 3                                              | 1.03 | Does the taxon have invasive races, varieties, sub-taxa or congeners?                                                                                                   | Yes                                                 | Other congeners. CABI, 2022. Invasive Species Compendium. Wallingford, UK: CAB International. www.cabi.org/isc.                                                                                                                                                                                    | Very high |
| 2. Climate, distribution and introduction risk |      |                                                                                                                                                                         |                                                     |                                                                                                                                                                                                                                                                                                    |           |
| 4                                              | 2.01 | How similar are the climatic conditions of the Risk Assessment (RA) area and the taxon's native range?                                                                  | High                                                | Results of climatch algorithm                                                                                                                                                                                                                                                                      | High      |
| 5                                              | 2.02 | What is the quality of the climate matching data?                                                                                                                       | Low                                                 | Due to low accuracy of local climate data                                                                                                                                                                                                                                                          | High      |
| 6                                              | 2.03 | Is the taxon already present outside of captivity in the RA area?                                                                                                       | Yes                                                 | Kuljanishvili, T., Mumladze, L., Japoshvili, B., Mustafayev, N., Ibrahimov, S., Patoka, J., ... & Kalous, L. (2021). The first unified inventory of non-native fishes of the South Caucasian countries, Armenia, Azerbaijan, and Georgia. Knowledge & Management of Aquatic Ecosystems, (422), 32. | Very high |
| 7                                              | 2.04 | How many potential vectors could the taxon use to enter in the RA area?                                                                                                 | None                                                | Human mediated translocation                                                                                                                                                                                                                                                                       | High      |
| 8                                              | 2.05 | Is the taxon currently found in close proximity to, and likely to enter into, the RA area in the near future (e.g. unintentional and intentional introductions)?        | Yes                                                 | Kuljanishvili, T., Mumladze, L., Japoshvili, B., Mustafayev, N., Ibrahimov, S., Patoka, J., ... & Kalous, L. (2021). The first unified inventory of non-native fishes of the South Caucasian countries, Armenia, Azerbaijan, and Georgia. Knowledge & Management of Aquatic Ecosystems, (422), 32. | Very high |
| 3. Invasive elsewhere                          |      |                                                                                                                                                                         |                                                     |                                                                                                                                                                                                                                                                                                    |           |
| 9                                              | 3.01 | Has the taxon become naturalised (established viable populations) outside its native range?                                                                             | Yes                                                 | Kuljanishvili, T., Mumladze, L., Japoshvili, B., Mustafayev, N., Ibrahimov, S., Patoka, J., ... & Kalous, L. (2021). The first unified inventory of non-native fishes of the South Caucasian countries, Armenia, Azerbaijan, and Georgia. Knowledge & Management of Aquatic Ecosystems, (422), 32. | Very high |
| 10                                             | 3.02 | In the taxon's introduced range, are there known adverse impacts to wild stocks or commercial taxa?                                                                     | No                                                  | No documented evidence                                                                                                                                                                                                                                                                             | Low       |
| 11                                             | 3.03 | In the taxon's introduced range, are there known adverse impacts to aquaculture?                                                                                        | No                                                  | No documented evidence                                                                                                                                                                                                                                                                             | Low       |
| 12                                             | 3.04 | In the taxon's introduced range, are there known adverse impacts to ecosystem                                                                                           | No                                                  | No documented evidence                                                                                                                                                                                                                                                                             | Low       |
| 13                                             | 3.05 | In the taxon's introduced range, are there known adverse socio-economic impacts?                                                                                        | No                                                  | No documented evidence                                                                                                                                                                                                                                                                             | Low       |
| B. Biology/Ecology                             |      |                                                                                                                                                                         |                                                     |                                                                                                                                                                                                                                                                                                    |           |
| 4. Undesirable (or persistence) traits         |      |                                                                                                                                                                         |                                                     |                                                                                                                                                                                                                                                                                                    |           |
| 14                                             | 4.01 | Is it likely that the taxon will be poisonous or pose other risks to human health?                                                                                      | No                                                  | Species is harmless                                                                                                                                                                                                                                                                                | Very high |
| 15                                             | 4.02 | Is it likely that the taxon will smother one or more native taxa (that are not threatened or protected)?                                                                | No                                                  | No documented evidence                                                                                                                                                                                                                                                                             | Low       |
| 16                                             | 4.03 | Are there any threatened or protected taxa that the non-native taxon would parasitise in the RA area?                                                                   | No                                                  | Species is not parasite                                                                                                                                                                                                                                                                            | High      |
| 17                                             | 4.04 | Is the taxon adaptable in terms of climatic and other environmental conditions, thus enhancing its potential persistence if it has invaded or could invade the RA area? | Yes                                                 | Guessed based on its ability to tolerate with varying level of salinity                                                                                                                                                                                                                            | Low       |
| 18                                             | 4.05 | Is the taxon likely to disrupt food-web structure/function in aquatic ecosystems if it has invaded or is likely to invade the RA                                        | No                                                  | No documented evidence                                                                                                                                                                                                                                                                             | Low       |
| 19                                             | 4.06 | Is the taxon likely to exert adverse impacts on ecosystem services in the RA area?                                                                                      | No                                                  | No documented evidence                                                                                                                                                                                                                                                                             | Low       |
| 20                                             | 4.07 | Is it likely that the taxon will host, and/or act as a vector for, recognised pests and infectious agents that are endemic in the RA                                    | No                                                  | No documented evidence                                                                                                                                                                                                                                                                             | Low       |
| 21                                             | 4.08 | Is it likely that the taxon will host, and/or act as a vector for, recognised pests and infectious agents that are absent from (novel to) the RA area?                  | Yes                                                 | No documented evidence                                                                                                                                                                                                                                                                             | Low       |

|                                 |      |                                                                                                                                                                              |     |                                                                                                                                                                                                                                                                                       |           |
|---------------------------------|------|------------------------------------------------------------------------------------------------------------------------------------------------------------------------------|-----|---------------------------------------------------------------------------------------------------------------------------------------------------------------------------------------------------------------------------------------------------------------------------------------|-----------|
| 22                              | 4.09 | Is it likely that the taxon will achieve a body size that will make it more likely to be released from captivity?                                                            | Yes | Species reared in mariculture for future release                                                                                                                                                                                                                                      | High      |
| 23                              | 4.10 | Is the taxon capable of sustaining itself in a range of water velocity conditions (e.g. versatile in habitat use)?                                                           | Yes | No documented evidence                                                                                                                                                                                                                                                                | Low       |
| 24                              | 4.11 | Is it likely that the taxon's mode of existence (e.g. excretion of by-products) or behaviours (e.g. feeding) will reduce habitat quality for native taxa?                    | No  | No documented evidence                                                                                                                                                                                                                                                                | Low       |
| 25                              | 4.12 | Is the taxon likely to maintain a viable population even when present in low densities (or persisting in adverse conditions by way of a dormant form)?                       | No  | No documented evidence                                                                                                                                                                                                                                                                | Low       |
| <b>5. Resource exploitation</b> |      |                                                                                                                                                                              |     |                                                                                                                                                                                                                                                                                       |           |
| 26                              | 5.01 | Is the taxon likely to consume threatened or protected native taxa in the RA area?                                                                                           | No  | No documented evidence                                                                                                                                                                                                                                                                | Low       |
| 27                              | 5.02 | Is the taxon likely to sequester food resources (including nutrients) to the detriment of native taxa in the RA area?                                                        | Yes | No documented evidence                                                                                                                                                                                                                                                                | Low       |
| <b>6. Reproduction</b>          |      |                                                                                                                                                                              |     |                                                                                                                                                                                                                                                                                       |           |
| 28                              | 6.01 | Is the taxon likely to exhibit parental care and/or to reduce age-at-maturity in response to environmental conditions?                                                       | No  | Kottelat, M., Freyhof, J., 2007. Handbook of European freshwater fishes. Imprimeria du Democrate SA, Dlemont. <a href="https://doi.org/10.1643/OT-08-098a.1">https://doi.org/10.1643/OT-08-098a.1</a>                                                                                 | Very high |
| 29                              | 6.02 | Is the taxon likely to produce viable gametes or propagules (in the RA area)?                                                                                                | Yes | Species is established and reproducing in RA area                                                                                                                                                                                                                                     | Very high |
| 30                              | 6.03 | Is the taxon likely to hybridise naturally with native taxa?                                                                                                                 | No  | Not a documented evidence exists                                                                                                                                                                                                                                                      | High      |
| 31                              | 6.04 | Is the taxon likely to be hermaphroditic or to display asexual reproduction?                                                                                                 | No  | Species is sexually reproducing (Kottelat, M., Freyhof, J., 2007. Handbook of European freshwater fishes. Imprimeria du Democrate SA, Dlemont. <a href="https://doi.org/10.1643/OT-08-098a.1">https://doi.org/10.1643/OT-08-098a.1</a> )                                              | Very high |
| 32                              | 6.05 | Is the taxon dependent on the presence of another taxon (or specific habitat features) to complete its life cycle?                                                           | No  | It has independent life cycle                                                                                                                                                                                                                                                         | Very high |
| 33                              | 6.06 | Is the taxon known (or likely) to produce a large number of propagules or offspring within a short time span (e.g. < 1 year)?                                                | Yes | Thousands of eggs are produced by a single individual                                                                                                                                                                                                                                 | Very high |
| 34                              | 6.07 | How many time units (days, months, years) does the taxon require to reach the age-at-first-reproduction?                                                                     | 3   | Kesiktaş, M., Yemişken, E., Yildiz, T., & Eryilmaz, L. (2020). Age, growth and reproduction of the golden grey mullet, <i>Chelon auratus</i> (Risso, 1810) in the Golden Horn Estuary, Istanbul. Journal of the Marine Biological Association of the United Kingdom, 100(6), 989-995. | Very high |
| <b>7. Dispersal mechanisms</b>  |      |                                                                                                                                                                              |     |                                                                                                                                                                                                                                                                                       |           |
| 35                              | 7.01 | How many potential internal vectors/pathways could the taxon use to disperse within the RA area (with suitable)                                                              | >1  | Active dispersal, Human mediated translocation                                                                                                                                                                                                                                        | High      |
| 36                              | 7.02 | Will any of these vectors/pathways bring the taxon in close proximity to one or more protected areas (e.g. MCZ, MPA, SSSI)?                                                  | No  | No such areas in the Caspian Sea                                                                                                                                                                                                                                                      | High      |
| 37                              | 7.03 | Does the taxon have a means of actively attaching itself to hard substrata (e.g. ship hulls, pilings, buoys) such that it enhances the likelihood of dispersal?              | No  | Not such fact is known. Furthermore, species morphology does not allow such behavior                                                                                                                                                                                                  | Very high |
| 38                              | 7.04 | Is natural dispersal of the taxon likely to occur as eggs (for animals) or as propagules (for plants: seeds, spores) in the RA area?                                         | Yes | Eggs are pelagic moving freely with water currents (Breder, C.M. and D.E. Rosen, 1966. Modes of reproduction in fishes. T.F.H. Publications, Neptune City, New Jersey. 941 p.)                                                                                                        | High      |
| 39                              | 7.05 | Is natural dispersal of the taxon likely to occur as larvae/juveniles (for animals) or as fragments/seedlings (for plants) in the RA area?                                   | Yes | Juveniles are actively swimming (Kottelat, M. and J. Freyhof, 2007. Handbook of European freshwater fishes. Publications Kottelat, Cornol and Freyhof, Berlin. 646 pp. )                                                                                                              | High      |
| 40                              | 7.06 | Are older life stages of the taxon likely to migrate in the RA area for reproduction?                                                                                        | No  | Not such an evidence is known                                                                                                                                                                                                                                                         | High      |
| 41                              | 7.07 | Are propagules or eggs of the taxon likely to be dispersed in the RA area by other animals?                                                                                  | No  | Not such an evidence exists                                                                                                                                                                                                                                                           | Very high |
| 42                              | 7.08 | Is dispersal of the taxon along any of the vectors/pathways mentioned in the previous seven questions (35-41; i.e. both unintentional or intentional) likely to be           | Yes | Eggs or juveniles that reach large number can disperse independently                                                                                                                                                                                                                  | Very high |
| 43                              | 7.09 | Is dispersal of the taxon density dependent?                                                                                                                                 | No  | No documented evidence                                                                                                                                                                                                                                                                | Medium    |
| <b>8. Tolerance attributes</b>  |      |                                                                                                                                                                              |     |                                                                                                                                                                                                                                                                                       |           |
| 44                              | 8.01 | Is the taxon able to withstand being out of water for extended periods (e.g. minimum of one or more hours) at some stage of its life cycle?                                  | No  | Not such evidence exists                                                                                                                                                                                                                                                              | Very high |
| 45                              | 8.02 | Is the taxon tolerant of a wide range of water quality conditions relevant to that taxon? [In the Justification field, indicate the relevant water quality variable(s) being | Yes | Salinity                                                                                                                                                                                                                                                                              | Medium    |
| 46                              | 8.03 | Can the taxon be controlled or eradicated in the wild with chemical, biological, or other agents/means?                                                                      | No  | Not known                                                                                                                                                                                                                                                                             | High      |
| 47                              | 8.04 | Is the taxon likely to tolerate or benefit from environmental/human disturbance?                                                                                             | No  | No such an evidence is known                                                                                                                                                                                                                                                          | High      |

|                          |      |                                                                                                                                                              |           |                                                                                                                                                                              |           |
|--------------------------|------|--------------------------------------------------------------------------------------------------------------------------------------------------------------|-----------|------------------------------------------------------------------------------------------------------------------------------------------------------------------------------|-----------|
| 48                       | 8.05 | Is the taxon able to tolerate salinity levels that are higher or lower than those found in its usual environment?                                            | No        | The species is living in marin and brackish waters and even occurring in lower reaches of rivers. Thus already tolerate large variety of salinity in its natural environment | Very high |
| 49                       | 8.06 | Are there effective natural enemies (predators) of the taxon present in the RA                                                                               | No        | In spite of some potential predators (Esox lucius, Sander lucioperca, Silurus glanis) no one is ever shown as an effective                                                   | Low       |
| <b>C. Climate change</b> |      |                                                                                                                                                              |           |                                                                                                                                                                              |           |
| <b>9. Climate change</b> |      |                                                                                                                                                              |           |                                                                                                                                                                              |           |
| 50                       | 9.01 | Under the predicted future climatic conditions, are the risks of entry into the RA area posed by the taxon likely to increase, decrease or not change?       | No change | Based on professional judgement                                                                                                                                              | Low       |
| 51                       | 9.02 | Under the predicted future climatic conditions, are the risks of establishment posed by the taxon likely to increase, decrease or not change?                | No change | Based on professional judgement                                                                                                                                              | Low       |
| 52                       | 9.03 | Under the predicted future climatic conditions, are the risks of dispersal within the RA area posed by the taxon likely to increase, decrease or not change? | No change | Based on professional judgement                                                                                                                                              | Low       |
| 53                       | 9.04 | Under the predicted future climatic conditions, what is the likely magnitude of future potential impacts on biodiversity and/or ecological integrity/status? | Higher    | Based on professional judgement                                                                                                                                              | Low       |
| 54                       | 9.05 | Under the predicted future climatic conditions, what is the likely magnitude of future potential impacts on ecosystem structure and/or function?             | Higher    | Based on professional judgement                                                                                                                                              | Low       |
| 55                       | 9.06 | Under the predicted future climatic conditions, what is the likely magnitude of future potential impacts on ecosystem services/socio-economic factors?       | Higher    | Based on professional judgement                                                                                                                                              | Low       |

| Statistics                                     |             |
|------------------------------------------------|-------------|
| Scores                                         |             |
| <b>BRA</b>                                     | <b>14.0</b> |
| <b>BRA Outcome</b>                             | <b>-</b>    |
| <b>BRA+CCA</b>                                 | <b>20.0</b> |
| <b>BRA+CCA Outcome</b>                         | <b>-</b>    |
| Score partition                                |             |
| <b>A. Biogeography/Historical</b>              | <b>6.0</b>  |
| 1. Domestication/Cultivation                   | 4.0         |
| 2. Climate, distribution and introduction risk | 0.0         |
| 3. Invasive elsewhere                          | 2.0         |
| <b>B. Biology/Ecology</b>                      | <b>8.0</b>  |
| 4. Undesirable (or persistence) traits         | 4.0         |
| 5. Resource exploitation                       | 2.0         |
| 6. Reproduction                                | 1.0         |
| 7. Dispersal mechanisms                        | 1.0         |
| 8. Tolerance attributes                        | 0.0         |
| <b>C. Climate change</b>                       | <b>6.0</b>  |
| 9. Climate change                              | 6.0         |
| Answered Questions                             |             |
| <b>Total</b>                                   | <b>55</b>   |
| <b>A. Biogeography/Historical</b>              | <b>13</b>   |
| 1. Domestication/Cultivation                   | 3           |
| 2. Climate, distribution and introduction risk | 5           |
| 3. Invasive elsewhere                          | 5           |
| <b>B. Biology/Ecology</b>                      | <b>36</b>   |
| 4. Undesirable (or persistence) traits         | 12          |
| 5. Resource exploitation                       | 2           |
| 6. Reproduction                                | 7           |
| 7. Dispersal mechanisms                        | 9           |
| 8. Tolerance attributes                        | 6           |
| <b>C. Climate change</b>                       | <b>6</b>    |
| 9. Climate change                              | 6           |
| Sectors affected                               |             |
| <b>Commercial</b>                              | <b>7</b>    |
| <b>Environmental</b>                           | <b>4</b>    |
| <b>Species or population nuisance traits</b>   | <b>11</b>   |

| Thresholds     |             |
|----------------|-------------|
| <b>BRA</b>     | <b>-</b>    |
| <b>BRA+CCA</b> | <b>-</b>    |
| Confidence     |             |
| <b>BRA+CCA</b> | <b>0.62</b> |
| <b>BRA</b>     | <b>0.67</b> |
| <b>CCA</b>     | <b>0.25</b> |

| Date and Time       |
|---------------------|
| 04/05/2022 13:04:41 |

## AS-ISK v2

| Taxon and Assessor details         |                                                                                               |
|------------------------------------|-----------------------------------------------------------------------------------------------|
| Category                           | Fishes and Lampreys (freshwater)                                                              |
| Taxon name                         | <i>Chelon auratus</i>                                                                         |
| Common name                        | golden grey mullet                                                                            |
| Assessor                           | Giorgi Epitashvili                                                                            |
| Risk screening context             |                                                                                               |
| Reason and socio-economic benefits | In some estuaries it is main target of both commercial fishery and recreational fishermen.    |
| Risk assessment area               | South Caucasus                                                                                |
| Taxonomy                           | <i>Chelon auratus</i> (Risso, 1810)                                                           |
| Native range                       | Eastern Atlantic: Scotland to Cape Verde; in the Mediterranean and Black Sea. Also in coastal |
| Introduced range                   | It has been introduced into the Caspian Sea.                                                  |
| URL                                | <a href="https://www.fishbase.se/summary/1735">https://www.fishbase.se/summary/1735</a>       |

|                                                       |      |                                                                                                                                                                         | Response       | Justification (references and/or other information)                                                                                                                                                                                                                                                                                                                                                                                                                                                                                      | Confidence |
|-------------------------------------------------------|------|-------------------------------------------------------------------------------------------------------------------------------------------------------------------------|----------------|------------------------------------------------------------------------------------------------------------------------------------------------------------------------------------------------------------------------------------------------------------------------------------------------------------------------------------------------------------------------------------------------------------------------------------------------------------------------------------------------------------------------------------------|------------|
| <b>A. Biogeography/Historical</b>                     |      |                                                                                                                                                                         |                |                                                                                                                                                                                                                                                                                                                                                                                                                                                                                                                                          |            |
| <b>1. Domestication/Cultivation</b>                   |      |                                                                                                                                                                         |                |                                                                                                                                                                                                                                                                                                                                                                                                                                                                                                                                          |            |
| 1                                                     | 1.01 | Has the taxon been the subject of domestication (or cultivation) for at least 20 generations?                                                                           | Yes            | The species' potential for aquaculture is enhanced by its euryhaline and eurythermal adaptability, allowing it to grow in a variety of ecosystems (Crosetti & Cataudella, 1995). Moreover, fry production is high in certain seasons, and their capture almost entirely supports seed supply for mullet aquaculture (Crosetti & Cataudella, 1995). Golden grey mullets are consumers of the low trophic layers and can therefore be used in most economic and efficient way by culturing them extensively (Crosetti & Cataudella, 1995). | High       |
| 2                                                     | 1.02 | Is the taxon harvested in the wild and likely to be sold or used in its live form?                                                                                      | Yes            | The fish has a trade importance (Ninua et al. 2013).                                                                                                                                                                                                                                                                                                                                                                                                                                                                                     | Very high  |
| 3                                                     | 1.03 | Does the taxon have invasive races, varieties, sub-taxa or congeners?                                                                                                   | Yes            | Data deficient                                                                                                                                                                                                                                                                                                                                                                                                                                                                                                                           | Medium     |
| <b>2. Climate, distribution and introduction risk</b> |      |                                                                                                                                                                         |                |                                                                                                                                                                                                                                                                                                                                                                                                                                                                                                                                          |            |
| 4                                                     | 2.01 | How similar are the climatic conditions of the Risk Assessment (RA) area and the taxon's native range?                                                                  | High           | This species is naturally distributed in the SC region.                                                                                                                                                                                                                                                                                                                                                                                                                                                                                  | Very high  |
| 5                                                     | 2.02 | What is the quality of the climate matching data?                                                                                                                       | High           | This species is naturally distributed in the SC region.                                                                                                                                                                                                                                                                                                                                                                                                                                                                                  | Very high  |
| 6                                                     | 2.03 | Is the taxon already present outside of captivity in the RA area?                                                                                                       | Yes            | This species is naturally distributed in the SC region and translocated in the Caspian Basin (Azerbaijan, Iran) (Kuljanishvili et al. 2013).                                                                                                                                                                                                                                                                                                                                                                                             | Very high  |
| 7                                                     | 2.04 | How many potential vectors could the taxon use to enter in the RA area?                                                                                                 | > 1            | This species is naturally distributed in the SC region. Also it was entered in the Caspian Sea basin via human, intentionally.                                                                                                                                                                                                                                                                                                                                                                                                           | Very high  |
| 8                                                     | 2.05 | Is the taxon currently found in close proximity to, and likely to enter into, the RA area in the near future (e.g. unintentional and intentional introductions)?        | Yes            | <i>Chelon auratus</i> is a common species and major commercial resource of Turkish waters (Kesiktaş et al. 2020).                                                                                                                                                                                                                                                                                                                                                                                                                        | Very high  |
| <b>3. Invasive elsewhere</b>                          |      |                                                                                                                                                                         |                |                                                                                                                                                                                                                                                                                                                                                                                                                                                                                                                                          |            |
| 9                                                     | 3.01 | Has the taxon become naturalised (established viable populations) outside its native range?                                                                             | Yes            | <i>C. auratus</i> was introduced from the Black Sea to the Caspian Sea in Azerbaijan, Kazakhstan and Turkmenistan. It is established in all three countries.                                                                                                                                                                                                                                                                                                                                                                             | Very high  |
| 10                                                    | 3.02 | In the taxon's introduced range, are there known adverse impacts to wild stocks or commercial taxa?                                                                     | No             | <i>C. auratus</i> has been introduced into the Caspian Sea where it has established populations but no negative impacts have been reported from this introduction. It has also been introduced in the Jordan River and Lake Kinneret but no adverse impacts have been recorded from these introductions.                                                                                                                                                                                                                                 | Very high  |
| 11                                                    | 3.03 | In the taxon's introduced range, are there known adverse impacts to aquaculture?                                                                                        | No             | No such fact has been reported                                                                                                                                                                                                                                                                                                                                                                                                                                                                                                           | High       |
| 12                                                    | 3.04 | In the taxon's introduced range, are there known adverse impacts to ecosystem?                                                                                          | No             | No such fact has been reported                                                                                                                                                                                                                                                                                                                                                                                                                                                                                                           | High       |
| 13                                                    | 3.05 | In the taxon's introduced range, are there known adverse socio-economic impacts?                                                                                        | No             | No such fact has been reported                                                                                                                                                                                                                                                                                                                                                                                                                                                                                                           | High       |
| <b>B. Biology/Ecology</b>                             |      |                                                                                                                                                                         |                |                                                                                                                                                                                                                                                                                                                                                                                                                                                                                                                                          |            |
| <b>4. Undesirable (or persistence) traits</b>         |      |                                                                                                                                                                         |                |                                                                                                                                                                                                                                                                                                                                                                                                                                                                                                                                          |            |
| 14                                                    | 4.01 | Is it likely that the taxon will be poisonous or pose other risks to human health?                                                                                      | No             | This species does not pose a threat to humans.                                                                                                                                                                                                                                                                                                                                                                                                                                                                                           | Very high  |
| 15                                                    | 4.02 | Is it likely that the taxon will smother one or more native taxa (that are not threatened or protected)?                                                                | No             | No such fact has been reported                                                                                                                                                                                                                                                                                                                                                                                                                                                                                                           | High       |
| 16                                                    | 4.03 | Are there any threatened or protected taxa that the non-native taxon would parasitise in the RA area?                                                                   | No             | A similar case is not expected because this species is naturally occurring in the SC region.                                                                                                                                                                                                                                                                                                                                                                                                                                             | High       |
| 17                                                    | 4.04 | Is the taxon adaptable in terms of climatic and other environmental conditions, thus enhancing its potential persistence if it has invaded or could invade the RA area? | Yes            | This species is naturally distributed in the SC region and environmental conditions are acceptable for it.                                                                                                                                                                                                                                                                                                                                                                                                                               | Very high  |
| 18                                                    | 4.05 | Is the taxon likely to disrupt food-web structure/function in aquatic ecosystems if it has invaded or is likely to invade the RA area?                                  | No             | This species is naturally distributed in the SC region and therefore, such fact is not expected.                                                                                                                                                                                                                                                                                                                                                                                                                                         | Very high  |
| 19                                                    | 4.06 | Is the taxon likely to exert adverse impacts on ecosystem services in the RA area?                                                                                      | No             | This species is naturally distributed in the SC region and therefore, such fact is not expected.                                                                                                                                                                                                                                                                                                                                                                                                                                         | Very high  |
| 20                                                    | 4.07 | Is it likely that the taxon will host, and/or act as a vector for, recognised pests and infectious agents that are endemic in the RA area?                              | Not applicable | Data deficient                                                                                                                                                                                                                                                                                                                                                                                                                                                                                                                           | Low        |

|                                 |      |                                                                                                                                                                              |                |                                                                                                                                                                                                                                                                                                                                                                                                                                                                                                                                                                                                   |           |
|---------------------------------|------|------------------------------------------------------------------------------------------------------------------------------------------------------------------------------|----------------|---------------------------------------------------------------------------------------------------------------------------------------------------------------------------------------------------------------------------------------------------------------------------------------------------------------------------------------------------------------------------------------------------------------------------------------------------------------------------------------------------------------------------------------------------------------------------------------------------|-----------|
| 21                              | 4.08 | Is it likely that the taxon will host, and/or act as a vector for, recognised pests and infectious agents that are absent from (novel to) the RA area?                       | Yes            | Parasite fauna of the golden grey mullet <i>Liza aurata</i> (Risso, 1810) collected from Lower Kızılırmak Delta in Samsun, Turkey were investigated in the present study. A total of 10 parasite species were identified and they are; <i>Trichodina puytoraci</i> , <i>Trichodina lepsi</i> , <i>Ligophorus mediterraneus</i> , <i>Ligophorus cephal</i> , <i>Microcotyle mugilis</i> , <i>Ascoctyle (Phagicola) longa</i> , <i>Haplosporidium puchysomus</i> , <i>Tylophorus clavata</i> , <i>Neoechinorhynchus agilis</i> and <i>Ergasilus lizae</i> . Overall infection prevalence was 100 %. | High      |
| 22                              | 4.09 | Is it likely that the taxon will achieve a body size that will make it more likely to be released from captivity?                                                            | Yes            | Its maximum length is around 60 centimetres and weight around 1.5 kilograms, but commonly it is much smaller fish with average specimen having 30 centimetres in length.                                                                                                                                                                                                                                                                                                                                                                                                                          | Very high |
| 23                              | 4.10 | Is the taxon capable of sustaining itself in a range of water velocity conditions (e.g. versatile in habitat use)?                                                           | No             | Adults are neritic usually in schools, entering lagoons and lower estuaries; rarely entering freshwater.                                                                                                                                                                                                                                                                                                                                                                                                                                                                                          | High      |
| 24                              | 4.11 | Is it likely that the taxon's mode of existence (e.g. excretion of by-products) or behaviours (e.g. feeding) will reduce habitat quality for native taxa?                    | No             | No such fact has been described                                                                                                                                                                                                                                                                                                                                                                                                                                                                                                                                                                   | High      |
| 25                              | 4.12 | Is the taxon likely to maintain a viable population even when present in low densities (or persisting in adverse conditions by way of a dormant form)?                       | Not applicable | Data deficient                                                                                                                                                                                                                                                                                                                                                                                                                                                                                                                                                                                    | Low       |
| <b>5. Resource exploitation</b> |      |                                                                                                                                                                              |                |                                                                                                                                                                                                                                                                                                                                                                                                                                                                                                                                                                                                   |           |
| 26                              | 5.01 | Is the taxon likely to consume threatened or protected native taxa in the RA area?                                                                                           | No             | No such fact has been detected                                                                                                                                                                                                                                                                                                                                                                                                                                                                                                                                                                    | High      |
| 27                              | 5.02 | Is the taxon likely to sequester food resources (including nutrients) to the detriment of native taxa in the RA area?                                                        | No             | No such fact has been described                                                                                                                                                                                                                                                                                                                                                                                                                                                                                                                                                                   | Medium    |
| <b>6. Reproduction</b>          |      |                                                                                                                                                                              |                |                                                                                                                                                                                                                                                                                                                                                                                                                                                                                                                                                                                                   |           |
| 28                              | 6.01 | Is the taxon likely to exhibit parental care and/or to reduce age-at-maturity in response to environmental conditions?                                                       | No             | Data deficient                                                                                                                                                                                                                                                                                                                                                                                                                                                                                                                                                                                    | Medium    |
| 29                              | 6.02 | Is the taxon likely to produce viable gametes or propagules (in the RA area)?                                                                                                | Yes            | This species is naturally reproduces in the SC region.                                                                                                                                                                                                                                                                                                                                                                                                                                                                                                                                            | Very high |
| 30                              | 6.03 | Is the taxon likely to hybridise naturally with native taxa?                                                                                                                 | No             | No such fact has been described from the introduced range of the <i>C. auratus</i> .                                                                                                                                                                                                                                                                                                                                                                                                                                                                                                              | Medium    |
| 31                              | 6.04 | Is the taxon likely to be hermaphroditic or to display asexual reproduction?                                                                                                 | Yes            | The present study documents the occurrence of an intersex condition in a natural population of mullet <i>Mugil cephalus</i> (Dhanasekar et al. 2018).                                                                                                                                                                                                                                                                                                                                                                                                                                             | High      |
| 32                              | 6.05 | Is the taxon dependent on the presence of another taxon (or specific habitat features) to complete its life cycle?                                                           | No             | This species does not have such requirements.                                                                                                                                                                                                                                                                                                                                                                                                                                                                                                                                                     | High      |
| 33                              | 6.06 | Is the taxon known (or likely) to produce a large number of propagules or offspring within a short time span (e.g. < 1 year)?                                                | Yes            | Fecundity of <i>C. auratus</i> is 142 000 to 4 440 000 eggs (Ninua et al. 2013).                                                                                                                                                                                                                                                                                                                                                                                                                                                                                                                  | High      |
| 34                              | 6.07 | How many time units (days, months, years) does the taxon require to reach the age-at-first-reproduction?                                                                     | 3              | The fish reaches sexual maturity at the age of 3-4 (Ninua et al. 2013).                                                                                                                                                                                                                                                                                                                                                                                                                                                                                                                           | Very high |
| <b>7. Dispersal mechanisms</b>  |      |                                                                                                                                                                              |                |                                                                                                                                                                                                                                                                                                                                                                                                                                                                                                                                                                                                   |           |
| 35                              | 7.01 | How many potential internal vectors/pathways could the taxon use to disperse within the RA area (with suitable)                                                              | >1             | This species is disperse or dispersed within the SC region naturally and intentionally by humans.                                                                                                                                                                                                                                                                                                                                                                                                                                                                                                 | High      |
| 36                              | 7.02 | Will any of these vectors/pathways bring the taxon in close proximity to one or more protected areas (e.g. MCZ, MPA, SSSI)?                                                  | Yes            | Such a fact is to be expected. This species is already distributed within the protected areas of SC region, for instance in the Kolkheti National Park, west Georgia.                                                                                                                                                                                                                                                                                                                                                                                                                             | Very high |
| 37                              | 7.03 | Does the taxon have a means of actively attaching itself to hard substrata (e.g. ship hulls, pilings, buoys) such that it enhances the likelihood of dispersal?              | No             | This species does not have such means.                                                                                                                                                                                                                                                                                                                                                                                                                                                                                                                                                            | Very high |
| 38                              | 7.04 | Is natural dispersal of the taxon likely to occur as eggs (for animals) or as propagules (for plants: seeds, spores) in the RA area?                                         | Yes            | This fish is naturally reproduces and dispersed in the SC region.                                                                                                                                                                                                                                                                                                                                                                                                                                                                                                                                 | Very high |
| 39                              | 7.05 | Is natural dispersal of the taxon likely to occur as larvae/juveniles (for animals) or as fragments/seedlings (for plants) in the RA area?                                   | Yes            | This fish is naturally reproduces and dispersed in the SC region.                                                                                                                                                                                                                                                                                                                                                                                                                                                                                                                                 | Very high |
| 40                              | 7.06 | Are older life stages of the taxon likely to migrate in the RA area for reproduction?                                                                                        | Yes            | This fish is naturally reproduces in the SC region.                                                                                                                                                                                                                                                                                                                                                                                                                                                                                                                                               | Very high |
| 41                              | 7.07 | Are propagules or eggs of the taxon likely to be dispersed in the RA area by other animals?                                                                                  | Yes            | Such a fact is not described though it is not ruled out.                                                                                                                                                                                                                                                                                                                                                                                                                                                                                                                                          | Medium    |
| 42                              | 7.08 | Is dispersal of the taxon along any of the vectors/pathways mentioned in the previous seven questions (35–41; i.e. both unintentional or intentional) likely to be           | Yes            | Own judgement                                                                                                                                                                                                                                                                                                                                                                                                                                                                                                                                                                                     | Medium    |
| 43                              | 7.09 | Is dispersal of the taxon density dependent?                                                                                                                                 | Not applicable | Data deficient                                                                                                                                                                                                                                                                                                                                                                                                                                                                                                                                                                                    | Low       |
| <b>8. Tolerance attributes</b>  |      |                                                                                                                                                                              |                |                                                                                                                                                                                                                                                                                                                                                                                                                                                                                                                                                                                                   |           |
| 44                              | 8.01 | Is the taxon able to withstand being out of water for extended periods (e.g. minimum of one or more hours) at some stage of its life cycle?                                  | No             | Such a fact is not known.                                                                                                                                                                                                                                                                                                                                                                                                                                                                                                                                                                         | Very high |
| 45                              | 8.02 | Is the taxon tolerant of a wide range of water quality conditions relevant to that taxon? [In the Justification field, indicate the relevant water quality variable(s) being | Yes            | It is tolerant of low oxygen levels and can ventilate water in contact with the air when conditions are hypoxic. This species lives in clear to turbid waters over sandy and muddy bottoms (Coad 2016).                                                                                                                                                                                                                                                                                                                                                                                           | High      |

|                          |      |                                                                                                                                                              |                |                                                                                                                                                       |           |
|--------------------------|------|--------------------------------------------------------------------------------------------------------------------------------------------------------------|----------------|-------------------------------------------------------------------------------------------------------------------------------------------------------|-----------|
| 46                       | 8.03 | Can the taxon be controlled or eradicated in the wild with chemical, biological, or other agents/means?                                                      | Not applicable | Data deficient                                                                                                                                        | Low       |
| 47                       | 8.04 | Is the taxon likely to tolerate or benefit from environmental/human disturbance?                                                                             | Yes            | In some countries/regions this species has spread by humans                                                                                           | High      |
| 48                       | 8.05 | Is the taxon able to tolerate salinity levels that are higher or lower than those found in its usual environment?                                            | Yes            | Golden grey mullet is a neritic species, usually inshore, entering lagoons, ports and estuaries, but rarely moves into freshwater. Spawns in the Sea. | Very high |
| 49                       | 8.06 | Are there effective natural enemies (predators) of the taxon present in the RA area?                                                                         | Yes            | There are several predators in the SC region which can control the C. auratus: Esox lucius, Sander lucioperca, Silurus glanis, Salmo labrax, etc.     | Very high |
| <b>C. Climate change</b> |      |                                                                                                                                                              |                |                                                                                                                                                       |           |
| <b>9. Climate change</b> |      |                                                                                                                                                              |                |                                                                                                                                                       |           |
| 50                       | 9.01 | Under the predicted future climatic conditions, are the risks of entry into the RA area posed by the taxon likely to increase, decrease or not change?       | No change      | Own judgement                                                                                                                                         | Medium    |
| 51                       | 9.02 | Under the predicted future climatic conditions, are the risks of establishment posed by the taxon likely to increase, decrease or not change?                | No change      | Own judgement                                                                                                                                         | Medium    |
| 52                       | 9.03 | Under the predicted future climatic conditions, are the risks of dispersal within the RA area posed by the taxon likely to increase, decrease or not change? | No change      | Own judgement                                                                                                                                         | Medium    |
| 53                       | 9.04 | Under the predicted future climatic conditions, what is the likely magnitude of future potential impacts on biodiversity and/or ecological integrity/status? | Lower          | Own judgement                                                                                                                                         | Medium    |
| 54                       | 9.05 | Under the predicted future climatic conditions, what is the likely magnitude of future potential impacts on ecosystem structure and/or function?             | Lower          | Own judgement                                                                                                                                         | Medium    |
| 55                       | 9.06 | Under the predicted future climatic conditions, what is the likely magnitude of future potential impacts on ecosystem services/socio-economic factors?       | Lower          | Own judgement                                                                                                                                         | Medium    |

| Statistics                                     |             |
|------------------------------------------------|-------------|
| Scores                                         |             |
| <b>BRA</b>                                     | <b>25.0</b> |
| <b>BRA Outcome</b>                             | <b>-</b>    |
| <b>BRA+CCA</b>                                 | <b>19.0</b> |
| <b>BRA+CCA Outcome</b>                         | <b>-</b>    |
| Score partition                                |             |
| <b>A. Biogeography/Historical</b>              | <b>8.0</b>  |
| 1. Domestication/Cultivation                   | 4.0         |
| 2. Climate, distribution and introduction risk | 2.0         |
| 3. Invasive elsewhere                          | 2.0         |
| <b>B. Biology/Ecology</b>                      | <b>17.0</b> |
| 4. Undesirable (or persistence) traits         | 3.0         |
| 5. Resource exploitation                       | 0.0         |
| 6. Reproduction                                | 3.0         |
| 7. Dispersal mechanisms                        | 6.0         |
| 8. Tolerance attributes                        | 5.0         |
| <b>C. Climate change</b>                       | <b>-6.0</b> |
| 9. Climate change                              | -6.0        |
| Answered Questions                             |             |
| <b>Total</b>                                   | <b>55</b>   |
| <b>A. Biogeography/Historical</b>              | <b>13</b>   |
| 1. Domestication/Cultivation                   | 3           |
| 2. Climate, distribution and introduction risk | 5           |
| 3. Invasive elsewhere                          | 5           |
| <b>B. Biology/Ecology</b>                      | <b>36</b>   |
| 4. Undesirable (or persistence) traits         | 12          |
| 5. Resource exploitation                       | 2           |
| 6. Reproduction                                | 7           |
| 7. Dispersal mechanisms                        | 9           |
| 8. Tolerance attributes                        | 6           |
| <b>C. Climate change</b>                       | <b>6</b>    |
| 9. Climate change                              | 6           |
| Sectors affected                               |             |
| <b>Commercial</b>                              | <b>5</b>    |
| <b>Environmental</b>                           | <b>-3</b>   |
| <b>Species or population nuisance traits</b>   | <b>22</b>   |

| Thresholds     |             |
|----------------|-------------|
| <b>BRA</b>     | <b>-</b>    |
| <b>BRA+CCA</b> | <b>-</b>    |
| Confidence     |             |
| <b>BRA+CCA</b> | <b>0.76</b> |
| <b>BRA</b>     | <b>0.80</b> |
| <b>CCA</b>     | <b>0.50</b> |

| Date and Time |
|---------------|
|---------------|

05/07/2021 17:23:09



## AS-ISK v2

| Taxon and Assessor details         |                                                                                                                       |
|------------------------------------|-----------------------------------------------------------------------------------------------------------------------|
| Category                           | Fishes and Lampreys (freshwater)                                                                                      |
| Taxon name                         | <i>Chelon auratus</i>                                                                                                 |
| Common name                        | golden grey mullet                                                                                                    |
| Assessor                           | Tatia Kuljanishvili                                                                                                   |
| Risk screening context             |                                                                                                                       |
| Reason and socio-economic benefits | Chelon auratus and C. saliens are native to the Black Sea basin, and both species were                                |
| Risk assessment area               | South Caucasus                                                                                                        |
| Taxonomy                           | Actinopteri (ray-finned fishes) > Mugiliformes (Mulletts) > Mugilidae                                                 |
| Native range                       | The Black Sea basin                                                                                                   |
| Introduced range                   | The Caspian Sea basin                                                                                                 |
| URL                                | <a href="https://fishbase.mhn.fr/summary/Chelon-auratus.html">https://fishbase.mhn.fr/summary/Chelon-auratus.html</a> |

|                                                |      |                                                                                                                                                                         | Response | Justification (references and/or other information)                                                                                                                                                   | Confidence |
|------------------------------------------------|------|-------------------------------------------------------------------------------------------------------------------------------------------------------------------------|----------|-------------------------------------------------------------------------------------------------------------------------------------------------------------------------------------------------------|------------|
| A. Biogeography/Historical                     |      |                                                                                                                                                                         |          |                                                                                                                                                                                                       |            |
| 1. Domestication/Cultivation                   |      |                                                                                                                                                                         |          |                                                                                                                                                                                                       |            |
| 1                                              | 1.01 | Has the taxon been the subject of domestication (or cultivation) for at least 20 generations?                                                                           | Yes      | This taxon has not been subject of substantial human selection, however it has comercial value and is being fisheries important.                                                                      | High       |
| 2                                              | 1.02 | Is the taxon harvested in the wild and likely to be sold or used in its live form?                                                                                      | Yes      | Yes. this species is very popular for market.                                                                                                                                                         | Very high  |
| 3                                              | 1.03 | Does the taxon have invasive races, varieties, sub-taxa or congeners?                                                                                                   | Yes      | Chelon labrosus (Yankova 2016) or Chelon saliens (Medium risk) (Moghaddas et al 2021)                                                                                                                 | Medium     |
| 2. Climate, distribution and introduction risk |      |                                                                                                                                                                         |          |                                                                                                                                                                                                       |            |
| 4                                              | 2.01 | How similar are the climatic conditions of the Risk Assessment (RA) area and the taxon's native range?                                                                  | High     | Somehow similar                                                                                                                                                                                       | Medium     |
| 5                                              | 2.02 | What is the quality of the climate matching data?                                                                                                                       | High     | There are no climatic stations in climatch to make this analysis. However, according to Koppen-Geiger map the climate is somehow similar.                                                             | Medium     |
| 6                                              | 2.03 | Is the taxon already present outside of captivity in the RA area?                                                                                                       | Yes      | are distributed over the entire Caspian sea basin (Bogutskaya et al. 2013; Yusifov et al. 2017). are also found in the brackish and fresh waters of the Caspian Sea coast (Kuljannishvili et al 2021) | Very high  |
| 7                                              | 2.04 | How many potential vectors could the taxon use to enter in the RA area?                                                                                                 | One      | Aquaculture                                                                                                                                                                                           | Very high  |
| 8                                              | 2.05 | Is the taxon currently found in close proximity to, and likely to enter into, the RA area in the near future (e.g. unintentional and intentional introductions)?        | Yes      | are distributed over the entire Caspian sea basin (Bogutskaya et al. 2013; Yusifov et al. 2017). are also found in the brackish and fresh waters of the Caspian Sea coast (Kuljannishvili et al 2021) | Very high  |
| 3. Invasive elsewhere                          |      |                                                                                                                                                                         |          |                                                                                                                                                                                                       |            |
| 9                                              | 3.01 | Has the taxon become naturalised (established viable populations) outside its                                                                                           | Yes      | species formed self-sustaining populations (Ibrahimov and Mustafayev 2015)                                                                                                                            | Very high  |
| 10                                             | 3.02 | In the taxon's introduced range, are there known adverse impacts to wild stocks or commercial taxa?                                                                     | No       | No adverse impacts to the wild comercial taxa ar known.                                                                                                                                               | Medium     |
| 11                                             | 3.03 | In the taxon's introduced range, are there known adverse impacts to aquaculture?                                                                                        | No       | No adverse impacts to aquaculture iare known.                                                                                                                                                         | Medium     |
| 12                                             | 3.04 | In the taxon's introduced range, are there known adverse impacts to ecosystem                                                                                           | No       | No adverse impacts to ecosystem are known, however, can be transmitting of parasites and deseases                                                                                                     | Low        |
| 13                                             | 3.05 | In the taxon's introduced range, are there known adverse socio-economic impacts?                                                                                        | No       | No adverse socio-economic impacts are known                                                                                                                                                           | High       |
| B. Biology/Ecology                             |      |                                                                                                                                                                         |          |                                                                                                                                                                                                       |            |
| 4. Undesirable (or persistence) traits         |      |                                                                                                                                                                         |          |                                                                                                                                                                                                       |            |
| 14                                             | 4.01 | Is it likely that the taxon will be poisonous or pose other risks to human health?                                                                                      | No       | Not poisonous <a href="https://fishbase.mnhn.fr/summary/Chelon-auratus.html">https://fishbase.mnhn.fr/summary/Chelon-auratus.html</a>                                                                 | Very high  |
| 15                                             | 4.02 | Is it likely that the taxon will smother one or more native taxa (that are not threatened or protected)?                                                                | No       | It is not known                                                                                                                                                                                       | Low        |
| 16                                             | 4.03 | Are there any threatened or protected taxa that the non-native taxon would parasitise in the RA area?                                                                   | No       | Does not parasite                                                                                                                                                                                     | Very high  |
| 17                                             | 4.04 | Is the taxon adaptable in terms of climatic and other environmental conditions, thus enhancing its potential persistence if it has invaded or could invade the RA area? | Yes      | This species can tolerate wide range of salinities and temeratures (Nita & Nenciu 2020)                                                                                                               | Very high  |
| 18                                             | 4.05 | Is the taxon likely to disrupt food-web structure/function in aquatic ecosystems if it has invaded or is likely to invade the RA                                        | No       | The impact of G. aculeatus in Azerbaijan has not been documented                                                                                                                                      | Low        |
| 19                                             | 4.06 | Is the taxon likely to exert adverse impacts on ecosystem services in the RA area?                                                                                      | No       | No adverse impacts on ecosystem services in the RA area is known.                                                                                                                                     | Low        |
| 20                                             | 4.07 | Is it likely that the taxon will host, and/or act as a vector for, recognised pests and infectious agents that are endemic in the RA                                    | No       | No information available                                                                                                                                                                              | Low        |
| 21                                             | 4.08 | Is it likely that the taxon will host, and/or act as a vector for, recognised pests and infectious agents that are absent from (novel to) the RA area?                  | Yes      | It is possible.                                                                                                                                                                                       | Low        |
| 22                                             | 4.09 | Is it likely that the taxon will achieve a body size that will make it more likely to be released from captivity?                                                       | Yes      | This taxon is usually reared and then released in open waters (Maricultures)                                                                                                                          | Very high  |
| 23                                             | 4.10 | Is the taxon capable of sustaining itself in a range of water velocity conditions (e.g. versatile in habitat use)?                                                      | Yes      | Yes. this specie is marine, which sometimes enters freshwaters                                                                                                                                        | High       |

|                                 |      |                                                                                                                                                                              |          |                                                                                                                                                                                                                                                    |           |
|---------------------------------|------|------------------------------------------------------------------------------------------------------------------------------------------------------------------------------|----------|----------------------------------------------------------------------------------------------------------------------------------------------------------------------------------------------------------------------------------------------------|-----------|
| 24                              | 4.11 | Is it likely that the taxon's mode of existence (e.g. excretion of by-products) or behaviours (e.g. feeding) will reduce habitat quality for native taxa?                    | No       | Not documented                                                                                                                                                                                                                                     | High      |
| 25                              | 4.12 | Is the taxon likely to maintain a viable population even when present in low densities (or persisting in adverse conditions by way of a dormant form)?                       | No       | Less likely. since the first attempt of introducing this species in caspian sea basin failed.                                                                                                                                                      | Low       |
| <b>5. Resource exploitation</b> |      |                                                                                                                                                                              |          |                                                                                                                                                                                                                                                    |           |
| 26                              | 5.01 | Is the taxon likely to consume threatened or protected native taxa in the RA area?                                                                                           | No       | This species feed on small benthic organisms, detritus, and occasionally on insects and plankton                                                                                                                                                   | Very high |
| 27                              | 5.02 | Is the taxon likely to sequester food resources (including nutrients) to the detriment of native taxa in the RA area?                                                        | No       | Less likely                                                                                                                                                                                                                                        | Medium    |
| <b>6. Reproduction</b>          |      |                                                                                                                                                                              |          |                                                                                                                                                                                                                                                    |           |
| 28                              | 6.01 | Is the taxon likely to exhibit parental care and/or to reduce age-at-maturity in response to environmental conditions?                                                       | No       | Not documented                                                                                                                                                                                                                                     | High      |
| 29                              | 6.02 | Is the taxon likely to produce viable gametes or propagules (in the RA area)?                                                                                                | Yes      | Yes. It has been considered as established species since 1930ies                                                                                                                                                                                   | Very high |
| 30                              | 6.03 | Is the taxon likely to hybridise naturally with native taxa?                                                                                                                 | No       | Not documented                                                                                                                                                                                                                                     | High      |
| 31                              | 6.04 | Is the taxon likely to be hermaphroditic or to display asexual reproduction?                                                                                                 | No       | No <a href="https://fishbase.mnhn.fr/summary/Chelon-auratus.html">https://fishbase.mnhn.fr/summary/Chelon-auratus.html</a>                                                                                                                         | Very high |
| 32                              | 6.05 | Is the taxon dependent on the presence of another taxon (or specific habitat features) to complete its life cycle?                                                           | No       | No. This taxon is not dependent on the presence of another taxon.                                                                                                                                                                                  | Very high |
| 33                              | 6.06 | Is the taxon known (or likely) to produce a large number of propagules or offspring within a short time span (e.g. < 1 year)?                                                | Yes      | Individual absolute ranges from 113 386 to 1.47 million eggs (Fazli et al 2008)                                                                                                                                                                    | High      |
| 34                              | 6.07 | How many time units (days, months, years) does the taxon require to reach the age-at-first-reproduction?                                                                     | 3        | "Fifty percent of sexual maturity was at FL 26.0 cm. Mature gonads were present in 20% of fish at age 3, 63% at age 4, 88% at age 5, and 97% at age 6. " (Fazli et al 2008)                                                                        | High      |
| <b>7. Dispersal mechanisms</b>  |      |                                                                                                                                                                              |          |                                                                                                                                                                                                                                                    |           |
| 35                              | 7.01 | How many potential internal vectors/pathways could the taxon use to disperse within the RA area (with suitable)                                                              | >1       | Aquaculture; recreational Fisheries;                                                                                                                                                                                                               | High      |
| 36                              | 7.02 | Will any of these vectors/pathways bring the taxon in close proximity to one or more protected areas (e.g. MCZ, MPA, SSSI)?                                                  | No       | It is possible however based on the species biological characters it will not establish in the protected areas. So the answer is no.                                                                                                               | Medium    |
| 37                              | 7.03 | Does the taxon have a means of actively attaching itself to hard substrata (e.g. ship hulls, pilings, buoys) such that it enhances the likelihood of dispersal?              | No       | No, The morphological traits of the species does not allow it to attach to the surfaces.                                                                                                                                                           | Very high |
| 38                              | 7.04 | Is natural dispersal of the taxon likely to occur as eggs (for animals) or as propagules (for plants: seeds, spores) in the RA area?                                         | No       | No. This sort of dispersal is highly unlikely.                                                                                                                                                                                                     | Very high |
| 39                              | 7.05 | Is natural dispersal of the taxon likely to occur as larvae/juveniles (for animals) or as fragments/seedlings (for plants) in the RA area?                                   | Yes      | Yes it is possible, juveniles can spread independently                                                                                                                                                                                             | High      |
| 40                              | 7.06 | Are older life stages of the taxon likely to migrate in the RA area for reproduction?                                                                                        | No       | No. it is reproducing in the sea                                                                                                                                                                                                                   | High      |
| 41                              | 7.07 | Are propagules or eggs of the taxon likely to be dispersed in the RA area by other animals?                                                                                  | No       | No. This is in my opinion not an option for dispersal.                                                                                                                                                                                             | Very high |
| 42                              | 7.08 | Is dispersal of the taxon along any of the vectors/pathways mentioned in the previous seven questions (35-41; i.e. both unintentional or intentional) likely to be           | Yes      | There is no information regarding how rapid is the stocking of this species in the RA area                                                                                                                                                         | Low       |
| 43                              | 7.09 | Is dispersal of the taxon density dependent?                                                                                                                                 | No       | Not documented                                                                                                                                                                                                                                     | High      |
| <b>8. Tolerance attributes</b>  |      |                                                                                                                                                                              |          |                                                                                                                                                                                                                                                    |           |
| 44                              | 8.01 | Is the taxon able to withstand being out of water for extended periods (e.g. minimum of one or more hours) at some stage of its life cycle?                                  | No       | Not known. Not likely.                                                                                                                                                                                                                             | High      |
| 45                              | 8.02 | Is the taxon tolerant of a wide range of water quality conditions relevant to that taxon? [In the Justification field, indicate the relevant water quality variable(s) being | Yes      | It can tolerate wide range of temperatures and salinities                                                                                                                                                                                          | Low       |
| 46                              | 8.03 | Can the taxon be controlled or eradicated in the wild with chemical, biological, or other agents/means?                                                                      | No       | Can not be eradicated. and it will not be, because it has fisheries value                                                                                                                                                                          | High      |
| 47                              | 8.04 | Is the taxon likely to tolerate or benefit from environmental/human disturbance?                                                                                             | No       | No. Not documented.                                                                                                                                                                                                                                | High      |
| 48                              | 8.05 | Is the taxon able to tolerate salinity levels that are higher or lower than those found in its usual environment?                                                            | Yes      | golden grey mullet fries can indeed tolerate a wide range of salinities (5‰-70‰),                                                                                                                                                                  | Very high |
| 49                              | 8.06 | Are there effective natural enemies (predators) of the taxon present in the RA                                                                                               | No       | no effective natural enemies exist in RA area                                                                                                                                                                                                      | High      |
| <b>C. Climate change</b>        |      |                                                                                                                                                                              |          |                                                                                                                                                                                                                                                    |           |
| <b>9. Climate change</b>        |      |                                                                                                                                                                              |          |                                                                                                                                                                                                                                                    |           |
| 50                              | 9.01 | Under the predicted future climatic conditions, are the risks of entry into the RA area posed by the taxon likely to increase, decrease or not change?                       | Increase | It was hypotheses that climate change might alert the mechanisms of transportation and introduction of non-native species. Commercial and recreational activities will increase, that itself increases the propagule pressure levels of non-native | High      |

|    |      |                                                                                                                                                              |           |                                                                                                                                      |        |
|----|------|--------------------------------------------------------------------------------------------------------------------------------------------------------------|-----------|--------------------------------------------------------------------------------------------------------------------------------------|--------|
| 51 | 9.02 | Under the predicted future climatic conditions, are the risks of establishment posed by the taxon likely to increase, decrease or not change?                | No change | Since this species are very much tolerant to wide range of temperatures their establishment will not decrease, it will stay the same | High   |
| 52 | 9.03 | Under the predicted future climatic conditions, are the risks of dispersal within the RA area posed by the taxon likely to increase, decrease or not change? | No change | No change                                                                                                                            | High   |
| 53 | 9.04 | Under the predicted future climatic conditions, what is the likely magnitude of future potential impacts on biodiversity and/or ecological integrity/status? | No change | No change                                                                                                                            | Medium |
| 54 | 9.05 | Under the predicted future climatic conditions, what is the likely magnitude of future potential impacts on ecosystem structure and/or function?             | No change | No change                                                                                                                            | Medium |
| 55 | 9.06 | Under the predicted future climatic conditions, what is the likely magnitude of future potential impacts on ecosystem services/socio-economic factors?       | No change | No change                                                                                                                            | Medium |

| Statistics                                     |             |
|------------------------------------------------|-------------|
| Scores                                         |             |
| <b>BRA</b>                                     | <b>14.0</b> |
| <b>BRA Outcome</b>                             | <b>-</b>    |
| <b>BRA+CCA</b>                                 | <b>16.0</b> |
| <b>BRA+CCA Outcome</b>                         | <b>-</b>    |
| Score partition                                |             |
| <b>A. Biogeography/Historical</b>              | <b>7.0</b>  |
| 1. Domestication/Cultivation                   | 4.0         |
| 2. Climate, distribution and introduction risk | 1.0         |
| 3. Invasive elsewhere                          | 2.0         |
| <b>B. Biology/Ecology</b>                      | <b>7.0</b>  |
| 4. Undesirable (or persistence) traits         | 4.0         |
| 5. Resource exploitation                       | 0.0         |
| 6. Reproduction                                | 1.0         |
| 7. Dispersal mechanisms                        | -1.0        |
| 8. Tolerance attributes                        | 3.0         |
| <b>C. Climate change</b>                       | <b>2.0</b>  |
| 9. Climate change                              | 2.0         |
| Answered Questions                             |             |
| <b>Total</b>                                   | <b>55</b>   |
| <b>A. Biogeography/Historical</b>              | <b>13</b>   |
| 1. Domestication/Cultivation                   | 3           |
| 2. Climate, distribution and introduction risk | 5           |
| 3. Invasive elsewhere                          | 5           |
| <b>B. Biology/Ecology</b>                      | <b>36</b>   |
| 4. Undesirable (or persistence) traits         | 12          |
| 5. Resource exploitation                       | 2           |
| 6. Reproduction                                | 7           |
| 7. Dispersal mechanisms                        | 9           |
| 8. Tolerance attributes                        | 6           |
| <b>C. Climate change</b>                       | <b>6</b>    |
| 9. Climate change                              | 6           |
| Sectors affected                               |             |
| <b>Commercial</b>                              | <b>6</b>    |
| <b>Environmental</b>                           | <b>0</b>    |
| <b>Species or population nuisance traits</b>   | <b>13</b>   |

| Thresholds     |             |
|----------------|-------------|
| <b>BRA</b>     | <b>-</b>    |
| <b>BRA+CCA</b> | <b>-</b>    |
| Confidence     |             |
| <b>BRA+CCA</b> | <b>0.70</b> |
| <b>BRA</b>     | <b>0.71</b> |
| <b>CCA</b>     | <b>0.63</b> |

| Date and Time       |  |
|---------------------|--|
| 20/05/2022 16:11:28 |  |

AS-ISK v2

| Taxon and Assessor details         |                                                                                                                       |
|------------------------------------|-----------------------------------------------------------------------------------------------------------------------|
| Category                           | Fishes and Lampreys (freshwater)                                                                                      |
| Taxon name                         | <i>Chelon saliens</i>                                                                                                 |
| Common name                        | leaping mullet                                                                                                        |
| Assessor                           | Bella Japoshvili                                                                                                      |
| Risk screening context             |                                                                                                                       |
| Reason and socio-economic benefits | The species have been translocated to the Caspian Sea and have important economic value                               |
| Risk assessment area               | South Caucasus                                                                                                        |
| Taxonomy                           | Actinopteri (ray-finned fishes) > Mugiliformes (Mulletts) > Mugilidae (Mulletts)                                      |
| Native range                       | Mediterranean Sea, Atlantic coast                                                                                     |
| Introduced range                   | Caspian Sea, USA                                                                                                      |
| URL                                | <a href="https://www.fishbase.de/summary/Chelon-saliens.html">https://www.fishbase.de/summary/Chelon-saliens.html</a> |

|                                                |      |                                                                                                                                                                  | Response | Justification (references and/or other information)                                                                                                                                                                                                                                                                                                                                                                                                                                                                            | Confidence |
|------------------------------------------------|------|------------------------------------------------------------------------------------------------------------------------------------------------------------------|----------|--------------------------------------------------------------------------------------------------------------------------------------------------------------------------------------------------------------------------------------------------------------------------------------------------------------------------------------------------------------------------------------------------------------------------------------------------------------------------------------------------------------------------------|------------|
| A. Biogeography/Historical                     |      |                                                                                                                                                                  |          |                                                                                                                                                                                                                                                                                                                                                                                                                                                                                                                                |            |
| 1. Domestication/Cultivation                   |      |                                                                                                                                                                  |          |                                                                                                                                                                                                                                                                                                                                                                                                                                                                                                                                |            |
| 1                                              | 1.01 | Has the taxon been the subject of domestication (or cultivation) for at least 20 generations?                                                                    | Yes      | Thomson, J.M., 1986. Mugilidae. p. 344-349. In J. Daget, J.-P. Gosse and D.F.E. Thys van den Audenaerde (eds.) Check-list of the freshwater fishes of Africa (CLOFFA). ISNB, Brussels, MRAC; Tervuren; and ORSTOM, Paris. Vol. 2.                                                                                                                                                                                                                                                                                              | High       |
| 2                                              | 1.02 | Is the taxon harvested in the wild and likely to be sold or used in its live form?                                                                               | Yes      | Thomson, J.M., 1986. Mugilidae. p. 344-349. In J. Daget, J.-P. Gosse and D.F.E. Thys van den Audenaerde (eds.) Check-list of the freshwater fishes of Africa (CLOFFA). ISNB, Brussels, MRAC; Tervuren; and ORSTOM, Paris. Vol. 2.                                                                                                                                                                                                                                                                                              | High       |
| 3                                              | 1.03 | Does the taxon have invasive races, varieties, sub-taxa or congeners?                                                                                            | Yes      | Congenerics (CABI, 2022. Invasive Species Compendium. Wallingford, UK: CAB International. www.cabi.org/isc.)                                                                                                                                                                                                                                                                                                                                                                                                                   | High       |
| 2. Climate, distribution and introduction risk |      |                                                                                                                                                                  |          |                                                                                                                                                                                                                                                                                                                                                                                                                                                                                                                                |            |
| 4                                              | 2.01 | How similar are the climatic conditions of the Risk Assessment (RA) area and the taxon's native range?                                                           | High     | Result of climatch algorithm                                                                                                                                                                                                                                                                                                                                                                                                                                                                                                   | Medium     |
| 5                                              | 2.02 | What is the quality of the climate matching data?                                                                                                                | Low      | Due to low accuracy of local climate data                                                                                                                                                                                                                                                                                                                                                                                                                                                                                      | High       |
| 6                                              | 2.03 | Is the taxon already present outside of captivity in the RA area?                                                                                                | Yes      | Kuljanishvili, T., Mumladze, L., Japoshvili, B., Mustafayev, N., Ibrahimov, S., Patoka, J., ... & Kalous, L. (2021). The first unified inventory of non-native fishes of the South Caucasian countries, Armenia, Azerbaijan, and Georgia. Knowledge & Management of Aquatic Ecosystems, (422), 32; Esmaeili, H. R., Teimori, A., Owfi, F., Abbasi, K., & Coad, B. W. (2014). Alien and invasive freshwater fish species in Iran: Diversity, environmental impacts and management. Iranian Journal of Ichthyology, 1(2), 62-72. | Very high  |
| 7                                              | 2.04 | How many potential vectors could the taxon use to enter in the RA area?                                                                                          | None     | Human mediated translocation                                                                                                                                                                                                                                                                                                                                                                                                                                                                                                   | Very high  |
| 8                                              | 2.05 | Is the taxon currently found in close proximity to, and likely to enter into, the RA area in the near future (e.g. unintentional and intentional introductions)? | Yes      | Kuljanishvili, T., Mumladze, L., Japoshvili, B., Mustafayev, N., Ibrahimov, S., Patoka, J., ... & Kalous, L. (2021). The first unified inventory of non-native fishes of the South Caucasian countries, Armenia, Azerbaijan, and Georgia. Knowledge & Management of Aquatic Ecosystems, (422), 32; Esmaeili, H. R., Teimori, A., Owfi, F., Abbasi, K., & Coad, B. W. (2014). Alien and invasive freshwater fish species in Iran: Diversity, environmental impacts and management. Iranian Journal of Ichthyology, 1(2), 62-72. | Very high  |
| 3. Invasive elsewhere                          |      |                                                                                                                                                                  |          |                                                                                                                                                                                                                                                                                                                                                                                                                                                                                                                                |            |
| 9                                              | 3.01 | Has the taxon become naturalised (established viable populations) outside its native range?                                                                      | Yes      | Esmaeili, H. R., Teimori, A., Owfi, F., Abbasi, K., & Coad, B. W. (2014). Alien and invasive freshwater fish species in Iran: Diversity, environmental impacts and management. Iranian Journal of Ichthyology, 1(2), 62-72.                                                                                                                                                                                                                                                                                                    | Very high  |
| 10                                             | 3.02 | In the taxon's introduced range, are there known adverse impacts to wild stocks or commercial taxa?                                                              | No       | No documented evidence                                                                                                                                                                                                                                                                                                                                                                                                                                                                                                         | Low        |
| 11                                             | 3.03 | In the taxon's introduced range, are there known adverse impacts to aquaculture?                                                                                 | No       | No documented evidence                                                                                                                                                                                                                                                                                                                                                                                                                                                                                                         | Low        |
| 12                                             | 3.04 | In the taxon's introduced range, are there known adverse impacts to ecosystem                                                                                    | No       | No documented evidence                                                                                                                                                                                                                                                                                                                                                                                                                                                                                                         | Low        |
| 13                                             | 3.05 | In the taxon's introduced range, are there known adverse socio-economic impacts?                                                                                 | No       | No documented evidence                                                                                                                                                                                                                                                                                                                                                                                                                                                                                                         | Low        |
| B. Biology/Ecology                             |      |                                                                                                                                                                  |          |                                                                                                                                                                                                                                                                                                                                                                                                                                                                                                                                |            |
| 4. Undesirable (or persistence) traits         |      |                                                                                                                                                                  |          |                                                                                                                                                                                                                                                                                                                                                                                                                                                                                                                                |            |
| 14                                             | 4.01 | Is it likely that the taxon will be poisonous or pose other risks to human health?                                                                               | No       | Not harmful species                                                                                                                                                                                                                                                                                                                                                                                                                                                                                                            | Very high  |
| 15                                             | 4.02 | Is it likely that the taxon will smother one or more native taxa (that are not threatened or protected)?                                                         | Yes      | No documented evidence                                                                                                                                                                                                                                                                                                                                                                                                                                                                                                         | Low        |
| 16                                             | 4.03 | Are there any threatened or protected taxa that the non-native taxon would parasitise in the RA area?                                                            | No       | Species is not parasite                                                                                                                                                                                                                                                                                                                                                                                                                                                                                                        | Very high  |

|                                 |      |                                                                                                                                                                         |     |                                                                                                                                                                                                                                                                                                                                                                                                                                                                                                                                                                                                                                                                                                                                                                                                                                                                                                                                                  |           |
|---------------------------------|------|-------------------------------------------------------------------------------------------------------------------------------------------------------------------------|-----|--------------------------------------------------------------------------------------------------------------------------------------------------------------------------------------------------------------------------------------------------------------------------------------------------------------------------------------------------------------------------------------------------------------------------------------------------------------------------------------------------------------------------------------------------------------------------------------------------------------------------------------------------------------------------------------------------------------------------------------------------------------------------------------------------------------------------------------------------------------------------------------------------------------------------------------------------|-----------|
| 17                              | 4.04 | Is the taxon adaptable in terms of climatic and other environmental conditions, thus enhancing its potential persistence if it has invaded or could invade the RA area? | Yes | The species is adaptable to a range of water salinity, oxygen level and turbidity. Minos G, Katselis G, Kaspiris P, Ondris I. 1994. The differential increase of morphometrical characters during the growth of grey mullet, <i>Liza ramada</i> (Risso) and <i>Liza saliens</i> (Risso), in the Messolonghi – Etoliko lagoon. Bios (Macedonia, Greece), 2:149-154.<br><a href="https://www.researchgate.net/publication/236343487">https://www.researchgate.net/publication/236343487</a> The differential increase of the morphometrical characters during the growth of the grey mullets <i>Liza ramada</i> Risso and <i>Liza saliens</i> Risso in Messolongi-Etoliko lagoon; Minos, G. Katselis, G. Kaspiris, P. Ondris, I. 1995. Comparison of the change in morphological pattern during the growth in length of the grey mullets <i>Liza ramada</i> and <i>Liza saliens</i> from western Greece. Fisheries Research No documented evidence | High      |
| 18                              | 4.05 | Is the taxon likely to disrupt food-web structure/function in aquatic ecosystems if it has invaded or is likely to invade the RA                                        | No  | No documented evidence                                                                                                                                                                                                                                                                                                                                                                                                                                                                                                                                                                                                                                                                                                                                                                                                                                                                                                                           | Low       |
| 19                              | 4.06 | Is the taxon likely to exert adverse impacts on ecosystem services in the RA area?                                                                                      | No  | No documented evidence                                                                                                                                                                                                                                                                                                                                                                                                                                                                                                                                                                                                                                                                                                                                                                                                                                                                                                                           | Low       |
| 20                              | 4.07 | Is it likely that the taxon will host, and/or act as a vector for, recognised pests and infectious agents that are endemic in the RA                                    | No  | No documented evidence                                                                                                                                                                                                                                                                                                                                                                                                                                                                                                                                                                                                                                                                                                                                                                                                                                                                                                                           | Low       |
| 21                              | 4.08 | Is it likely that the taxon will host, and/or act as a vector for, recognised pests and infectious agents that are absent from (novel to) the RA area?                  | No  | e.g. Zorriehzakra, M. E. J., M. Ghasemi, M. Ghiasi, S.Haghighi Karsidani, G. Bovo, A. Nazari, M. Adel, V. Arizza, and K. Dhama. 2016. Isolation and confirmation of viral nervous necrosis (VNN) disease in golden grey mullet ( <i>Liza aurata</i> ) and leaping mullet ( <i>Liza saliens</i> ) in the Iranian waters of the Caspian Sea. Veterinary                                                                                                                                                                                                                                                                                                                                                                                                                                                                                                                                                                                            | High      |
| 22                              | 4.09 | Is it likely that the taxon will achieve a body size that will make it more likely to be released from captivity?                                                       | Yes | No documented evidence.                                                                                                                                                                                                                                                                                                                                                                                                                                                                                                                                                                                                                                                                                                                                                                                                                                                                                                                          | Medium    |
| 23                              | 4.10 | Is the taxon capable of sustaining itself in a range of water velocity conditions (e.g. versatile in habitat use)?                                                      | Yes | No documented evidence                                                                                                                                                                                                                                                                                                                                                                                                                                                                                                                                                                                                                                                                                                                                                                                                                                                                                                                           | Low       |
| 24                              | 4.11 | Is it likely that the taxon's mode of existence (e.g. excretion of by-products) or behaviours (e.g. feeding) will reduce habitat quality for native taxa?               | No  | No such an evidence exist and not expected                                                                                                                                                                                                                                                                                                                                                                                                                                                                                                                                                                                                                                                                                                                                                                                                                                                                                                       | Low       |
| 25                              | 4.12 | Is the taxon likely to maintain a viable population even when present in low densities (or persisting in adverse conditions by way of a dormant form)?                  | No  | No such an evidence exist                                                                                                                                                                                                                                                                                                                                                                                                                                                                                                                                                                                                                                                                                                                                                                                                                                                                                                                        | Low       |
| <b>5. Resource exploitation</b> |      |                                                                                                                                                                         |     |                                                                                                                                                                                                                                                                                                                                                                                                                                                                                                                                                                                                                                                                                                                                                                                                                                                                                                                                                  |           |
| 26                              | 5.01 | Is the taxon likely to consume threatened or protected native taxa in the RA area?                                                                                      | No  | Species is plankton/detritus feeder and no threatened species within these organisms are known in the RA area                                                                                                                                                                                                                                                                                                                                                                                                                                                                                                                                                                                                                                                                                                                                                                                                                                    | Low       |
| 27                              | 5.02 | Is the taxon likely to sequester food resources (including nutrients) to the detriment of native taxa in the RA area?                                                   | Yes | No documented evidence; Professional judgement                                                                                                                                                                                                                                                                                                                                                                                                                                                                                                                                                                                                                                                                                                                                                                                                                                                                                                   | Low       |
| <b>6. Reproduction</b>          |      |                                                                                                                                                                         |     |                                                                                                                                                                                                                                                                                                                                                                                                                                                                                                                                                                                                                                                                                                                                                                                                                                                                                                                                                  |           |
| 28                              | 6.01 | Is the taxon likely to exhibit parental care and/or to reduce age-at-maturity in response to environmental conditions?                                                  | No  | No such an evidence is known                                                                                                                                                                                                                                                                                                                                                                                                                                                                                                                                                                                                                                                                                                                                                                                                                                                                                                                     | High      |
| 29                              | 6.02 | Is the taxon likely to produce viable gametes or propagules (in the RA area)?                                                                                           | Yes | Species is already established and reproducing in RA area                                                                                                                                                                                                                                                                                                                                                                                                                                                                                                                                                                                                                                                                                                                                                                                                                                                                                        | Very high |
| 30                              | 6.03 | Is the taxon likely to hybridise naturally with native taxa?                                                                                                            | No  | Not such an evidence is known                                                                                                                                                                                                                                                                                                                                                                                                                                                                                                                                                                                                                                                                                                                                                                                                                                                                                                                    | Low       |
| 31                              | 6.04 | Is the taxon likely to be hermaphroditic or to display asexual reproduction?                                                                                            | No  | Species is sexually reproducing (Kottelat, M., Freyhof, J., 2007. Handbook of European freshwater fishes. Imprimerie du Democrate SA, Dlemont. <a href="https://doi.org/10.1643/OT-08-098a.1">https://doi.org/10.1643/OT-08-098a.1</a> )                                                                                                                                                                                                                                                                                                                                                                                                                                                                                                                                                                                                                                                                                                         | High      |
| 32                              | 6.05 | Is the taxon dependent on the presence of another taxon (or specific habitat features) to complete its life cycle?                                                      | No  | No such an evidence is known                                                                                                                                                                                                                                                                                                                                                                                                                                                                                                                                                                                                                                                                                                                                                                                                                                                                                                                     | High      |
| 33                              | 6.06 | Is the taxon known (or likely) to produce a large number of propagules or offspring within a short time span (e.g. < 1 year)?                                           | Yes | Tousands of eggs are generated by a single individual per year                                                                                                                                                                                                                                                                                                                                                                                                                                                                                                                                                                                                                                                                                                                                                                                                                                                                                   | Very high |
| 34                              | 6.07 | How many time units (days, months, years) does the taxon require to reach the age-at-first-reproduction?                                                                | 2   | years                                                                                                                                                                                                                                                                                                                                                                                                                                                                                                                                                                                                                                                                                                                                                                                                                                                                                                                                            | High      |
| <b>7. Dispersal mechanisms</b>  |      |                                                                                                                                                                         |     |                                                                                                                                                                                                                                                                                                                                                                                                                                                                                                                                                                                                                                                                                                                                                                                                                                                                                                                                                  |           |
| 35                              | 7.01 | How many potential internal vectors/pathways could the taxon use to disperse within the RA area (with suitable                                                          | >1  | Active dispersal, human mediated translocation                                                                                                                                                                                                                                                                                                                                                                                                                                                                                                                                                                                                                                                                                                                                                                                                                                                                                                   | Medium    |
| 36                              | 7.02 | Will any of these vectors/pathways bring the taxon in close proximity to one or more protected areas (e.g. MCZ, MPA, SSSI)?                                             | No  | Species is found in Kolkheti National Park, Georgia. No other such PA is in RA area                                                                                                                                                                                                                                                                                                                                                                                                                                                                                                                                                                                                                                                                                                                                                                                                                                                              | High      |
| 37                              | 7.03 | Does the taxon have a means of actively attaching itself to hard substrata (e.g. ship hulls, pilings, buoys) such that it enhances the likelihood of dispersal?         | No  | No such an evidence is known. Species morphology and anatomy does not support such behavior                                                                                                                                                                                                                                                                                                                                                                                                                                                                                                                                                                                                                                                                                                                                                                                                                                                      | Very high |
| 38                              | 7.04 | Is natural dispersal of the taxon likely to occur as eggs (for animals) or as propagules (for plants: seeds, spores) in the RA area?                                    | Yes | Eggs are pelagic and juveniles are swimming freely (Breder, C.M. and D.E. Rosen, 1966. Modes of reproduction in fishes. T.F.H. Publications, Neptune City, New Jersey. 941 p.)                                                                                                                                                                                                                                                                                                                                                                                                                                                                                                                                                                                                                                                                                                                                                                   | High      |
| 39                              | 7.05 | Is natural dispersal of the taxon likely to occur as larvae/juveniles (for animals) or as fragments/seedlings (for plants) in the RA area?                              | Yes | Due to active swimming capabilities of juveniles                                                                                                                                                                                                                                                                                                                                                                                                                                                                                                                                                                                                                                                                                                                                                                                                                                                                                                 | High      |

|                                |      |                                                                                                                                                                              |           |                                                                                                                                                                                                                                                       |        |
|--------------------------------|------|------------------------------------------------------------------------------------------------------------------------------------------------------------------------------|-----------|-------------------------------------------------------------------------------------------------------------------------------------------------------------------------------------------------------------------------------------------------------|--------|
| 40                             | 7.06 | Are older life stages of the taxon likely to migrate in the RA area for reproduction?                                                                                        | No        | No such an evidence is known                                                                                                                                                                                                                          | High   |
| 41                             | 7.07 | Are propagules or eggs of the taxon likely to be dispersed in the RA area by other animals?                                                                                  | No        | No such an evidence are known                                                                                                                                                                                                                         | High   |
| 42                             | 7.08 | Is dispersal of the taxon along any of the vectors/pathways mentioned in the previous seven questions (35–41; i.e. both unintentional or intentional) likely to be           | Yes       | Speices are producing large number of pelagic eggs and juveniles re swimming with large colonies                                                                                                                                                      | High   |
| 43                             | 7.09 | Is dispersal of the taxon density dependent?                                                                                                                                 | No        | No documented evidence; Professional judgement                                                                                                                                                                                                        | Low    |
| <b>8. Tolerance attributes</b> |      |                                                                                                                                                                              |           |                                                                                                                                                                                                                                                       |        |
| 44                             | 8.01 | Is the taxon able to withstand being out of water for extended periods (e.g. minimum of one or more hours) at some stage of its life cycle?                                  | No        | No such an evidence is known                                                                                                                                                                                                                          | Low    |
| 45                             | 8.02 | Is the taxon tolerant of a wide range of water quality conditions relevant to that taxon? [In the Justification field, indicate the relevant water quality variable(s) being | Yes       | Oxygen level, salinity, turbidity; Bekova, R., Prodanov, B. & Lambev, T (2019). Mulletts and the impact of the environmental status of Burgas Bay on their populations. In International Scientific Conference "Kliment's Days (Vol. 104, pp. 62-69). | Medium |
| 46                             | 8.03 | Can the taxon be controlled or eradicated in the wild with chemical, biological, or other agents/means?                                                                      | No        | No documented evidence; Professional judgement                                                                                                                                                                                                        | Low    |
| 47                             | 8.04 | Is the taxon likely to tolerate or benefit from environmental/human disturbance?                                                                                             | No        | No such an evidence is known.                                                                                                                                                                                                                         | Low    |
| 48                             | 8.05 | Is the taxon able to tolerate salinity levels that are higher or lower than those found in its usual environment?                                                            | No        | Species is using variable salinity environment in its natural habitats.                                                                                                                                                                               | High   |
| 49                             | 8.06 | Are there effective natural enemies (predators) of the taxon present in the RA                                                                                               | No        | In spite of a number of predators in RA area, no any of them are shown to be effective                                                                                                                                                                | Low    |
| <b>C. Climate change</b>       |      |                                                                                                                                                                              |           |                                                                                                                                                                                                                                                       |        |
| <b>9. Climate change</b>       |      |                                                                                                                                                                              |           |                                                                                                                                                                                                                                                       |        |
| 50                             | 9.01 | Under the predicted future climatic conditions, are the risks of entry into the RA area posed by the taxon likely to increase, decrease or not change?                       | No change | Based on professional judgement                                                                                                                                                                                                                       | Low    |
| 51                             | 9.02 | Under the predicted future climatic conditions, are the risks of establishment posed by the taxon likely to increase, decrease or not change?                                | No change | Based on professional judgement                                                                                                                                                                                                                       | Low    |
| 52                             | 9.03 | Under the predicted future climatic conditions, are the risks of dispersal within the RA area posed by the taxon likely to increase, decrease or not change?                 | No change | Based on professional judgement                                                                                                                                                                                                                       | Low    |
| 53                             | 9.04 | Under the predicted future climatic conditions, what is the likely magnitude of future potential impacts on biodiversity and/or ecological integrity/status?                 | Higher    | Based on professional judgement                                                                                                                                                                                                                       | Low    |
| 54                             | 9.05 | Under the predicted future climatic conditions, what is the likely magnitude of future potential impacts on ecosystem structure and/or function?                             | Higher    | Based on professional judgement                                                                                                                                                                                                                       | Low    |
| 55                             | 9.06 | Under the predicted future climatic conditions, what is the likely magnitude of future potential impacts on ecosystem services/socio-economic factors?                       | Higher    | based on professional judgement                                                                                                                                                                                                                       | Low    |

| Statistics                                     |             |
|------------------------------------------------|-------------|
| Scores                                         |             |
| <b>BRA</b>                                     | <b>14.0</b> |
| <b>BRA Outcome</b>                             | <b>-</b>    |
| <b>BRA+CCA</b>                                 | <b>20.0</b> |
| <b>BRA+CCA Outcome</b>                         | <b>-</b>    |
| Score partition                                |             |
| <b>A. Biogeography/Historical</b>              | <b>6.0</b>  |
| 1. Domestication/Cultivation                   | 4.0         |
| 2. Climate, distribution and introduction risk | 0.0         |
| 3. Invasive elsewhere                          | 2.0         |
| <b>B. Biology/Ecology</b>                      | <b>8.0</b>  |
| 4. Undesirable (or persistence) traits         | 4.0         |
| 5. Resource exploitation                       | 2.0         |
| 6. Reproduction                                | 1.0         |
| 7. Dispersal mechanisms                        | 1.0         |
| 8. Tolerance attributes                        | 0.0         |
| <b>C. Climate change</b>                       | <b>6.0</b>  |
| 9. Climate change                              | 6.0         |
| Answered Questions                             |             |
| <b>Total</b>                                   | <b>55</b>   |
| <b>A. Biogeography/Historical</b>              | <b>13</b>   |
| 1. Domestication/Cultivation                   | 3           |
| 2. Climate, distribution and introduction risk | 5           |
| 3. Invasive elsewhere                          | 5           |
| <b>B. Biology/Ecology</b>                      | <b>36</b>   |
| 4. Undesirable (or persistence) traits         | 12          |
| 5. Resource exploitation                       | 2           |
| 6. Reproduction                                | 7           |
| 7. Dispersal mechanisms                        | 9           |

|                                              |           |
|----------------------------------------------|-----------|
| 8. Tolerance attributes                      | 6         |
| <b>C. Climate change</b>                     | <b>6</b>  |
| 9. Climate change                            | 6         |
| <b>Sectors affected</b>                      |           |
| Commercial                                   | 7         |
| Environmental                                | 4         |
| <b>Species or population nuisance traits</b> | <b>11</b> |

|                   |      |
|-------------------|------|
| <b>Thresholds</b> |      |
| BRA               | -    |
| BRA+CCA           | -    |
| <b>Confidence</b> |      |
| BRA+CCA           | 0.55 |
| BRA               | 0.58 |
| CCA               | 0.25 |

|                      |                     |
|----------------------|---------------------|
| <b>Date and Time</b> |                     |
|                      | 04/05/2022 13:30:23 |

## AS-ISK v2

| Taxon and Assessor details         |                                                                                                             |
|------------------------------------|-------------------------------------------------------------------------------------------------------------|
| Category                           | Fishes and Lampreys (freshwater)                                                                            |
| Taxon name                         | <i>Chelon saliens</i>                                                                                       |
| Common name                        | leaping mullet                                                                                              |
| Assessor                           | Giorgi Epitashvili                                                                                          |
| Risk screening context             |                                                                                                             |
| Reason and socio-economic benefits | The fish has a trade importance.                                                                            |
| Risk assessment area               | South Caucasus                                                                                              |
| Taxonomy                           | <i>Chelon saliens</i> (Risso, 1810)                                                                         |
| Native range                       | Eastern Atlantic: Mediterranean Sea, the Black Sea, Sea of Azov and Atlantic coasts from Morocco            |
| Introduced range                   | Introduced to Iran and is now naturally occurring in the Caspian Sea basin.                                 |
| URL                                | <a href="https://www.fishbase.se/summary/Chelon-saliens">https://www.fishbase.se/summary/Chelon-saliens</a> |

|                                                |      |                                                                                                                                                                         | Response       | Justification (references and/or other information)                                                                                                                                                                                                         | Confidence |
|------------------------------------------------|------|-------------------------------------------------------------------------------------------------------------------------------------------------------------------------|----------------|-------------------------------------------------------------------------------------------------------------------------------------------------------------------------------------------------------------------------------------------------------------|------------|
| A. Biogeography/Historical                     |      |                                                                                                                                                                         |                |                                                                                                                                                                                                                                                             |            |
| 1. Domestication/Cultivation                   |      |                                                                                                                                                                         |                |                                                                                                                                                                                                                                                             |            |
| 1                                              | 1.01 | Has the taxon been the subject of domestication (or cultivation) for at least 20 generations?                                                                           | Yes            | Grey mullets are important food fishes. The euryhalinity, eurythermality and their simpler diet, as well as the rapid growth of some species, have made them the object of aquaculture in many parts of the world, including the Mediterranean (Oren, 1981) | Medium     |
| 2                                              | 1.02 | Is the taxon harvested in the wild and likely to be sold or used in its live form?                                                                                      | Yes            | Data deficient                                                                                                                                                                                                                                              | Medium     |
| 3                                              | 1.03 | Does the taxon have invasive races, varieties, sub-taxa or congeners?                                                                                                   | No             | Data deficient                                                                                                                                                                                                                                              | Medium     |
| 2. Climate, distribution and introduction risk |      |                                                                                                                                                                         |                |                                                                                                                                                                                                                                                             |            |
| 4                                              | 2.01 | How similar are the climatic conditions of the Risk Assessment (RA) area and the taxon's native range?                                                                  | High           | This species is naturally distributed in the SC region.                                                                                                                                                                                                     | Very high  |
| 5                                              | 2.02 | What is the quality of the climate matching data?                                                                                                                       | High           | This species is naturally distributed in the SC region (Ninua et al. 2013; Kuljanishvili et al. 2020).                                                                                                                                                      | Very high  |
| 6                                              | 2.03 | Is the taxon already present outside of captivity in the RA area?                                                                                                       | Yes            | This species is naturally distributed in the SC region (Ninua et al. 2013; Kuljanishvili et al. 2020).                                                                                                                                                      | Very high  |
| 7                                              | 2.04 | How many potential vectors could the taxon use to enter in the RA area?                                                                                                 | >1             | This species is naturally distributed in the SC region, also it has been translocated in the Caspian Sea intentionally for aquacultural purposes.                                                                                                           | Very high  |
| 8                                              | 2.05 | Is the taxon currently found in close proximity to, and likely to enter into, the RA area in the near future (e.g. unintentional and intentional introductions)?        | Yes            | This species is naturally distributed in the Caucasus region. <i>C. saliens</i> is also distributed in Turkey and introduced in Iran.                                                                                                                       | Very high  |
| 3. Invasive elsewhere                          |      |                                                                                                                                                                         |                |                                                                                                                                                                                                                                                             |            |
| 9                                              | 3.01 | Has the taxon become naturalised (established viable populations) outside its native range?                                                                             | Yes            | <i>C. saliens</i> has been introduced into Israel, Iran, Azerbaijan, Kazakhstan, and Turkmenistan, where it has established populations. Now this fish naturally occurring in the Caspian Sea                                                               | Very high  |
| 10                                             | 3.02 | In the taxon's introduced range, are there known adverse impacts to wild stocks or commercial taxa?                                                                     | No             | <i>C. saliens</i> has been introduced into Israel, Iran, Azerbaijan, Kazakhstan, and Turkmenistan, where it has established populations. The introduction to Israel was for aquaculture. No negative impacts have been reported from these introductions.   | High       |
| 11                                             | 3.03 | In the taxon's introduced range, are there known adverse impacts to aquaculture?                                                                                        | No             | <i>C. saliens</i> has been introduced into Israel, Iran, Azerbaijan, Kazakhstan, and Turkmenistan, where it has established populations. The introduction to Israel was for aquaculture. No negative impacts have been reported from these introductions.   | High       |
| 12                                             | 3.04 | In the taxon's introduced range, are there known adverse impacts to ecosystem services?                                                                                 | No             | <i>C. saliens</i> has been introduced into Israel, Iran, Azerbaijan, Kazakhstan, and Turkmenistan, where it has established populations. The introduction to Israel was for aquaculture. No negative impacts have been reported from these introductions.   | High       |
| 13                                             | 3.05 | In the taxon's introduced range, are there known adverse socio-economic impacts?                                                                                        | No             | <i>C. saliens</i> has been introduced into Israel, Iran, Azerbaijan, Kazakhstan, and Turkmenistan, where it has established populations. The introduction to Israel was for aquaculture. No negative impacts have been reported from these introductions.   | High       |
| B. Biology/Ecology                             |      |                                                                                                                                                                         |                |                                                                                                                                                                                                                                                             |            |
| 4. Undesirable (or persistence) traits         |      |                                                                                                                                                                         |                |                                                                                                                                                                                                                                                             |            |
| 14                                             | 4.01 | Is it likely that the taxon will be poisonous or pose other risks to human health?                                                                                      | No             | This species does not pose a threat to humans.                                                                                                                                                                                                              | Very high  |
| 15                                             | 4.02 | Is it likely that the taxon will smother one or more native taxa (that are not threatened or protected)?                                                                | No             | No such fact has been detected.                                                                                                                                                                                                                             | Medium     |
| 16                                             | 4.03 | Are there any threatened or protected taxa that the non-native taxon would parasitise in the RA area?                                                                   | Yes            | There are several threatened and protected species in the SC region which may be affected by <i>C. saliens</i> (competition, eggs consumption, etc).                                                                                                        | Medium     |
| 17                                             | 4.04 | Is the taxon adaptable in terms of climatic and other environmental conditions, thus enhancing its potential persistence if it has invaded or could invade the RA area? | Yes            | This species is naturally distributed in the Caucasus region and climatic conditions are acceptable for it.                                                                                                                                                 | Very high  |
| 18                                             | 4.05 | Is the taxon likely to disrupt food-web structure/function in aquatic ecosystems if it has invaded or is likely to invade the RA area?                                  | No             | This species is naturally distributed in the Caucasus region and such a case is not expected.                                                                                                                                                               | Very high  |
| 19                                             | 4.06 | Is the taxon likely to exert adverse impacts on ecosystem services in the RA area?                                                                                      | No             | This species is naturally distributed in the Caucasus region and such a case is not expected.                                                                                                                                                               | Very high  |
| 20                                             | 4.07 | Is it likely that the taxon will host, and/or act as a vector for, recognised pests and infectious agents that are endemic in the RA area?                              | Not applicable | Data deficient                                                                                                                                                                                                                                              | Low        |



|                                 |      |                                                                                                                                                                              |                |                                                                                                                                                                                                                                                                                                                                                                                                                                                        |           |
|---------------------------------|------|------------------------------------------------------------------------------------------------------------------------------------------------------------------------------|----------------|--------------------------------------------------------------------------------------------------------------------------------------------------------------------------------------------------------------------------------------------------------------------------------------------------------------------------------------------------------------------------------------------------------------------------------------------------------|-----------|
| 21                              | 4.08 | Is it likely that the taxon will host, and/or act as a vector for, recognised pests and infectious agents that are absent from (novel to) the RA area?                       | No             | Such a case is not expected.                                                                                                                                                                                                                                                                                                                                                                                                                           | Medium    |
| 22                              | 4.09 | Is it likely that the taxon will achieve a body size that will make it more likely to be released from captivity?                                                            | Yes            | Max length of <i>C. saliens</i> is 40.0 cm SL male/unsexed; common length: 30 cm, therefore this fish is good object for aquaculture.                                                                                                                                                                                                                                                                                                                  | Very high |
| 23                              | 4.10 | Is the taxon capable of sustaining itself in a range of water velocity conditions (e.g. versatile in habitat use)?                                                           | No             | Adults usually in schools inhabit coastal waters, sometimes in lagoons and estuaries.                                                                                                                                                                                                                                                                                                                                                                  | High      |
| 24                              | 4.11 | Is it likely that the taxon's mode of existence (e.g. excretion of by-products) or behaviours (e.g. feeding) will reduce habitat quality for native taxa?                    | No             | No such fact has been described.                                                                                                                                                                                                                                                                                                                                                                                                                       | High      |
| 25                              | 4.12 | Is the taxon likely to maintain a viable population even when present in low densities (or persisting in adverse conditions by way of a dormant form)?                       | Not applicable | Data deficient                                                                                                                                                                                                                                                                                                                                                                                                                                         | Low       |
| <b>5. Resource exploitation</b> |      |                                                                                                                                                                              |                |                                                                                                                                                                                                                                                                                                                                                                                                                                                        |           |
| 26                              | 5.01 | Is the taxon likely to consume threatened or protected native taxa in the RA area?                                                                                           | No             | No such fact has been described.                                                                                                                                                                                                                                                                                                                                                                                                                       | Medium    |
| 27                              | 5.02 | Is the taxon likely to sequester food resources (including nutrients) to the detriment of native taxa in the RA area?                                                        | Yes            | The adults feed on worms, on snails, on crustaceans. The fry feed on detritus and on plankton (Ninua et al. 2013).                                                                                                                                                                                                                                                                                                                                     | High      |
| <b>6. Reproduction</b>          |      |                                                                                                                                                                              |                |                                                                                                                                                                                                                                                                                                                                                                                                                                                        |           |
| 28                              | 6.01 | Is the taxon likely to exhibit parental care and/or to reduce age-at-maturity in response to environmental conditions?                                                       | Not applicable | Data deficient                                                                                                                                                                                                                                                                                                                                                                                                                                         | Low       |
| 29                              | 6.02 | Is the taxon likely to produce viable gametes or propagules (in the RA area)?                                                                                                | Yes            | This species is naturally reproduces in the SC region.                                                                                                                                                                                                                                                                                                                                                                                                 | Very high |
| 30                              | 6.03 | Is the taxon likely to hybridise naturally with native taxa?                                                                                                                 | No             | No such fact has been described.                                                                                                                                                                                                                                                                                                                                                                                                                       | High      |
| 31                              | 6.04 | Is the taxon likely to be hermaphroditic or to display asexual reproduction?                                                                                                 | Yes            | Tancioni et al. (2015) affirmed that the prevalence of natural hermaphroditism in mullets is non-existent or very low, some cases were previously reported for <i>M. cephalus</i> (Franks et al. 1998) and <i>L. ramada</i> (Bayhan & Acarli 2006). Thus, it is also possible that there is a general lack of information on this specific topic for migratory fish such as mullets, conversely to other more studied species (Bahamonde et al. 2013). | Medium    |
| 32                              | 6.05 | Is the taxon dependent on the presence of another taxon (or specific habitat features) to complete its life cycle?                                                           | No             | This species does not have such requirements.                                                                                                                                                                                                                                                                                                                                                                                                          | High      |
| 33                              | 6.06 | Is the taxon known (or likely) to produce a large number of propagules or offspring within a short time span (e.g. < 1 year)?                                                | Yes            | Fecundity of <i>C. saliens</i> is 500 000 to 2 100 000 eggs (Ninua et al. 2013).                                                                                                                                                                                                                                                                                                                                                                       | Very high |
| 34                              | 6.07 | How many time units (days, months, years) does the taxon require to reach the age-at-first-reproduction?                                                                     | 3              | It becomes sexually mature at the age of 3 (Ninua et al. 2013).                                                                                                                                                                                                                                                                                                                                                                                        | Very high |
| <b>7. Dispersal mechanisms</b>  |      |                                                                                                                                                                              |                |                                                                                                                                                                                                                                                                                                                                                                                                                                                        |           |
| 35                              | 7.01 | How many potential internal vectors/pathways could the taxon use to disperse within the RA area (with suitable)                                                              | > 1            | This fish is distributed in the region naturally and possibly by humans.                                                                                                                                                                                                                                                                                                                                                                               | High      |
| 36                              | 7.02 | Will any of these vectors/pathways bring the taxon in close proximity to one or more protected areas (e.g. MCZ, MPA, SSSI)?                                                  | Yes            | <i>C. saliens</i> are found in protected areas of the SC region, such as Lake Paliastomi, in Kolikheti National Park, Georgia.                                                                                                                                                                                                                                                                                                                         | Very high |
| 37                              | 7.03 | Does the taxon have a means of actively attaching itself to hard substrata (e.g. ship hulls, pilings, buoys) such that it enhances the likelihood of dispersal?              | No             | This fish does not have such means.                                                                                                                                                                                                                                                                                                                                                                                                                    | Very high |
| 38                              | 7.04 | Is natural dispersal of the taxon likely to occur as eggs (for animals) or as propagules (for plants: seeds, spores) in the RA area?                                         | Yes            | This species is naturally reproduces in the SC region (Ninua et al. 2013; Kuljanishvili et al. 2020).                                                                                                                                                                                                                                                                                                                                                  | Very high |
| 39                              | 7.05 | Is natural dispersal of the taxon likely to occur as larvae/juveniles (for animals) or as fragments/seedlings (for plants) in the RA area?                                   | Yes            | This species is naturally reproduces in the SC region (Ninua et al. 2013; Kuljanishvili et al. 2020).                                                                                                                                                                                                                                                                                                                                                  | Very high |
| 40                              | 7.06 | Are older life stages of the taxon likely to migrate in the RA area for reproduction?                                                                                        | Yes            | This species is naturally reproduces in the SC region (Ninua et al. 2013; Kuljanishvili et al. 2020).                                                                                                                                                                                                                                                                                                                                                  | Very high |
| 41                              | 7.07 | Are propagules or eggs of the taxon likely to be dispersed in the RA area by other animals?                                                                                  | Yes            | There is no evidence of this, though it is possible.                                                                                                                                                                                                                                                                                                                                                                                                   | Medium    |
| 42                              | 7.08 | Is dispersal of the taxon along any of the vectors/pathways mentioned in the previous seven questions (35–41; i.e. both unintentional or intentional) likely to be           | Yes            | Own judgement                                                                                                                                                                                                                                                                                                                                                                                                                                          | Medium    |
| 43                              | 7.09 | Is dispersal of the taxon density dependent?                                                                                                                                 | Not applicable | Data deficient                                                                                                                                                                                                                                                                                                                                                                                                                                         | Low       |
| <b>8. Tolerance attributes</b>  |      |                                                                                                                                                                              |                |                                                                                                                                                                                                                                                                                                                                                                                                                                                        |           |
| 44                              | 8.01 | Is the taxon able to withstand being out of water for extended periods (e.g. minimum of one or more hours) at some stage of its life cycle?                                  | No             | No such fact has been revealed.                                                                                                                                                                                                                                                                                                                                                                                                                        | Very high |
| 45                              | 8.02 | Is the taxon tolerant of a wide range of water quality conditions relevant to that taxon? [In the Justification field, indicate the relevant water quality variable(s) being | Yes            | Data deficient                                                                                                                                                                                                                                                                                                                                                                                                                                         | Low       |

|                          |      |                                                                                                                                                              |           |                                                                                                                                                                          |           |
|--------------------------|------|--------------------------------------------------------------------------------------------------------------------------------------------------------------|-----------|--------------------------------------------------------------------------------------------------------------------------------------------------------------------------|-----------|
| 46                       | 8.03 | Can the taxon be controlled or eradicated in the wild with chemical, biological, or other agents/means?                                                      | Yes       | Own judgement                                                                                                                                                            | Medium    |
| 47                       | 8.04 | Is the taxon likely to tolerate or benefit from environmental/human disturbance?                                                                             | Yes       | This species has expanded its range with the help of humans.                                                                                                             | High      |
| 48                       | 8.05 | Is the taxon able to tolerate salinity levels that are higher or lower than those found in its usual environment?                                            | Yes       | C. saliens is shoal sea fish, it's easily adapted to fresh and brackish waters (Ninua et al. 2013).                                                                      | Very high |
| 49                       | 8.06 | Are there effective natural enemies (predators) of the taxon present in the RA area?                                                                         | Yes       | There are several potential predators in the SC region which can controll the C. saliens populations: Esox lucius, Silurus glanis, Sander lucioperca, Salmo labrax, etc. | Very high |
| <b>C. Climate change</b> |      |                                                                                                                                                              |           |                                                                                                                                                                          |           |
| <b>9. Climate change</b> |      |                                                                                                                                                              |           |                                                                                                                                                                          |           |
| 50                       | 9.01 | Under the predicted future climatic conditions, are the risks of entry into the RA area posed by the taxon likely to increase, decrease or not change?       | No change | Own judgement                                                                                                                                                            | Medium    |
| 51                       | 9.02 | Under the predicted future climatic conditions, are the risks of establishment posed by the taxon likely to increase, decrease or not change?                | No change | Own judgement                                                                                                                                                            | Medium    |
| 52                       | 9.03 | Under the predicted future climatic conditions, are the risks of dispersal within the RA area posed by the taxon likely to increase, decrease or not change? | No change | Own judgement                                                                                                                                                            | Medium    |
| 53                       | 9.04 | Under the predicted future climatic conditions, what is the likely magnitude of future potential impacts on biodiversity and/or ecological integrity/status? | Lower     | Own judgement                                                                                                                                                            | Medium    |
| 54                       | 9.05 | Under the predicted future climatic conditions, what is the likely magnitude of future potential impacts on ecosystem structure and/or function?             | Lower     | Own judgement                                                                                                                                                            | Medium    |
| 55                       | 9.06 | Under the predicted future climatic conditions, what is the likely magnitude of future potential impacts on ecosystem services/socio-economic factors?       | Lower     | Own judgement                                                                                                                                                            | Medium    |

| Statistics                                     |             |
|------------------------------------------------|-------------|
| Scores                                         |             |
| <b>BRA</b>                                     | <b>23.0</b> |
| <b>BRA Outcome</b>                             | <b>-</b>    |
| <b>BRA+CCA</b>                                 | <b>17.0</b> |
| <b>BRA+CCA Outcome</b>                         | <b>-</b>    |
| Score partition                                |             |
| <b>A. Biogeography/Historical</b>              | <b>6.0</b>  |
| 1. Domestication/Cultivation                   | 2.0         |
| 2. Climate, distribution and introduction risk | 2.0         |
| 3. Invasive elsewhere                          | 2.0         |
| <b>B. Biology/Ecology</b>                      | <b>17.0</b> |
| 4. Undesirable (or persistence) traits         | 3.0         |
| 5. Resource exploitation                       | 2.0         |
| 6. Reproduction                                | 3.0         |
| 7. Dispersal mechanisms                        | 6.0         |
| 8. Tolerance attributes                        | 3.0         |
| <b>C. Climate change</b>                       | <b>-6.0</b> |
| 9. Climate change                              | -6.0        |
| Answered Questions                             |             |
| <b>Total</b>                                   | <b>55</b>   |
| <b>A. Biogeography/Historical</b>              | <b>13</b>   |
| 1. Domestication/Cultivation                   | 3           |
| 2. Climate, distribution and introduction risk | 5           |
| 3. Invasive elsewhere                          | 5           |
| <b>B. Biology/Ecology</b>                      | <b>36</b>   |
| 4. Undesirable (or persistence) traits         | 12          |
| 5. Resource exploitation                       | 2           |
| 6. Reproduction                                | 7           |
| 7. Dispersal mechanisms                        | 9           |
| 8. Tolerance attributes                        | 6           |
| <b>C. Climate change</b>                       | <b>6</b>    |
| 9. Climate change                              | 6           |
| Sectors affected                               |             |
| <b>Commercial</b>                              | <b>5</b>    |
| <b>Environmental</b>                           | <b>-3</b>   |
| <b>Species or population nuisance traits</b>   | <b>20</b>   |

| Thresholds     |             |
|----------------|-------------|
| <b>BRA</b>     | <b>-</b>    |
| <b>BRA+CCA</b> | <b>-</b>    |
| Confidence     |             |
| <b>BRA+CCA</b> | <b>0.73</b> |
| <b>BRA</b>     | <b>0.76</b> |
| <b>CCA</b>     | <b>0.50</b> |

| Date and Time |
|---------------|
|---------------|

03/05/2022 14:17:07

## AS-ISK v2

| Taxon and Assessor details         |                                                                                                                         |
|------------------------------------|-------------------------------------------------------------------------------------------------------------------------|
| Category                           | Fishes and Lampreys (freshwater)                                                                                        |
| Taxon name                         | <i>Chelon saliens</i>                                                                                                   |
| Common name                        | leaping mullet                                                                                                          |
| Assessor                           | Tatia Kuljanishvili                                                                                                     |
| Risk screening context             |                                                                                                                         |
| Reason and socio-economic benefits | Chelon auratus and C. saliens are native to the Black Sea basin, and both species were                                  |
| Risk assessment area               | South Caucasus                                                                                                          |
| Taxonomy                           | Actinopteri (ray-finned fishes) > Mugiliformes (Mulletts) > Mugilidae (Mulletts)                                        |
| Native range                       | The Black Sea basin                                                                                                     |
| Introduced range                   | The Caspian Sea basin                                                                                                   |
| URL                                | <a href="https://fishbase.mnhn.fr/summary/Chelon-saliens.html">https://fishbase.mnhn.fr/summary/Chelon-saliens.html</a> |

|                                                |      |                                                                                                                                                                         | Response | Justification (references and/or other information)                                                                                                                                                   | Confidence |
|------------------------------------------------|------|-------------------------------------------------------------------------------------------------------------------------------------------------------------------------|----------|-------------------------------------------------------------------------------------------------------------------------------------------------------------------------------------------------------|------------|
| A. Biogeography/Historical                     |      |                                                                                                                                                                         |          |                                                                                                                                                                                                       |            |
| 1. Domestication/Cultivation                   |      |                                                                                                                                                                         |          |                                                                                                                                                                                                       |            |
| 1                                              | 1.01 | Has the taxon been the subject of domestication (or cultivation) for at least 20 generations?                                                                           | Yes      | This taxon has not been subject of substantial human selection, however it has commercial value and is being fisheries important.                                                                     | High       |
| 2                                              | 1.02 | Is the taxon harvested in the wild and likely to be sold or used in its live form?                                                                                      | Yes      | Yes, it is harvested in the wild and is likely to be sold in its live form.                                                                                                                           | Very high  |
| 3                                              | 1.03 | Does the taxon have invasive races, varieties, sub-taxa or congeners?                                                                                                   | Yes      | Chelon labrosus (Yankova 2016)                                                                                                                                                                        | Medium     |
| 2. Climate, distribution and introduction risk |      |                                                                                                                                                                         |          |                                                                                                                                                                                                       |            |
| 4                                              | 2.01 | How similar are the climatic conditions of the Risk Assessment (RA) area and the taxon's native range?                                                                  | High     | Somehow similar                                                                                                                                                                                       | Medium     |
| 5                                              | 2.02 | What is the quality of the climate matching data?                                                                                                                       | Low      | There are no climatic stations in climatch to make this analysis. However, according to Koppen-Geiger map the climate is somehow similar.                                                             | Medium     |
| 6                                              | 2.03 | Is the taxon already present outside of captivity in the RA area?                                                                                                       | Yes      | Yes it is distributed allover Caspian Sea basin                                                                                                                                                       | Very high  |
| 7                                              | 2.04 | How many potential vectors could the taxon use to enter in the RA area?                                                                                                 | One      | Aquaculture                                                                                                                                                                                           | High       |
| 8                                              | 2.05 | Is the taxon currently found in close proximity to, and likely to enter into, the RA area in the near future (e.g. unintentional and intentional introductions)?        | Yes      | Are distributed over the entire Caspian sea basin (Bogutskaya et al. 2013; Yusifov et al. 2017). are also found in the brackish and fresh waters of the Caspian Sea coast (Kuljannishvili et al 2021) | Very high  |
| 3. Invasive elsewhere                          |      |                                                                                                                                                                         |          |                                                                                                                                                                                                       |            |
| 9                                              | 3.01 | Has the taxon become naturalised (established viable populations) outside its                                                                                           | Yes      | Species formed self-sustaining populations (Ibrahimov and Mustafayev 2015)                                                                                                                            | Very high  |
| 10                                             | 3.02 | In the taxon's introduced range, are there known adverse impacts to wild stocks or commercial taxa?                                                                     | No       | No adverse impacts to the wild commercial taxa are known.                                                                                                                                             | Medium     |
| 11                                             | 3.03 | In the taxon's introduced range, are there known adverse impacts to aquaculture?                                                                                        | No       | No adverse impacts to aquaculture are known.                                                                                                                                                          | Medium     |
| 12                                             | 3.04 | In the taxon's introduced range, are there known adverse impacts to ecosystem                                                                                           | No       | No adverse impacts to ecosystem are known. Possible can be transmitting parasites or diseases                                                                                                         | Medium     |
| 13                                             | 3.05 | In the taxon's introduced range, are there known adverse socio-economic impacts?                                                                                        | No       | No adverse socio-economic impacts are known                                                                                                                                                           | Medium     |
| B. Biology/Ecology                             |      |                                                                                                                                                                         |          |                                                                                                                                                                                                       |            |
| 4. Undesirable (or persistence) traits         |      |                                                                                                                                                                         |          |                                                                                                                                                                                                       |            |
| 14                                             | 4.01 | Is it likely that the taxon will be poisonous or pose other risks to human health?                                                                                      | No       | Not poisonous. <a href="https://fishbase.mnhn.fr/summary/Chelon-saliens.html">https://fishbase.mnhn.fr/summary/Chelon-saliens.html</a>                                                                | Very high  |
| 15                                             | 4.02 | Is it likely that the taxon will smother one or more native taxa (that are not threatened or protected)?                                                                | No       | It is not known                                                                                                                                                                                       | Medium     |
| 16                                             | 4.03 | Are there any threatened or protected taxa that the non-native taxon would parasitise in the RA area?                                                                   | No       | Does not parasite <a href="https://fishbase.mnhn.fr/summary/Chelon-saliens.html">https://fishbase.mnhn.fr/summary/Chelon-saliens.html</a>                                                             | Very high  |
| 17                                             | 4.04 | Is the taxon adaptable in terms of climatic and other environmental conditions, thus enhancing its potential persistence if it has invaded or could invade the RA area? | Yes      | This species can tolerate wide range of salinities (Hotos & Vlahos 1998)                                                                                                                              | Medium     |
| 18                                             | 4.05 | Is the taxon likely to disrupt food-web structure/function in aquatic ecosystems if it has invaded or is likely to invade the RA                                        | No       | The impact of C. saliens in Azerbaijan has not been documented                                                                                                                                        | Low        |
| 19                                             | 4.06 | Is the taxon likely to exert adverse impacts on ecosystem services in the RA area?                                                                                      | No       | No adverse impacts on ecosystem services in the RA area is known.                                                                                                                                     | Low        |
| 20                                             | 4.07 | Is it likely that the taxon will host, and/or act as a vector for, recognised pests and infectious agents that are endemic in the RA                                    | No       | No information available                                                                                                                                                                              | Low        |
| 21                                             | 4.08 | Is it likely that the taxon will host, and/or act as a vector for, recognised pests and infectious agents that are absent from (novel to) the RA area?                  | Yes      | It is possible.                                                                                                                                                                                       | Medium     |
| 22                                             | 4.09 | Is it likely that the taxon will achieve a body size that will make it more likely to be released from captivity?                                                       | Yes      | This taxon is usually reared and then released in open waters (Maricultures)                                                                                                                          | Very high  |
| 23                                             | 4.10 | Is the taxon capable of sustaining itself in a range of water velocity conditions (e.g. versatile in habitat use)?                                                      | Yes      | Yes. this specie is marine, which sometimes enters freshwaters                                                                                                                                        | High       |

|                                 |      |                                                                                                                                                                              |          |                                                                                                                                                                                                                                                     |           |
|---------------------------------|------|------------------------------------------------------------------------------------------------------------------------------------------------------------------------------|----------|-----------------------------------------------------------------------------------------------------------------------------------------------------------------------------------------------------------------------------------------------------|-----------|
| 24                              | 4.11 | Is it likely that the taxon's mode of existence (e.g. excretion of by-products) or behaviours (e.g. feeding) will reduce habitat quality for native taxa?                    | No       | No. Not documented                                                                                                                                                                                                                                  | High      |
| 25                              | 4.12 | Is the taxon likely to maintain a viable population even when present in low densities (or persisting in adverse conditions by way of a dormant form)?                       | No       | Less likely. since the first attempt of introducing this species in caspian sea basin failed.                                                                                                                                                       | Medium    |
| <b>5. Resource exploitation</b> |      |                                                                                                                                                                              |          |                                                                                                                                                                                                                                                     |           |
| 26                              | 5.01 | Is the taxon likely to consume threatened or protected native taxa in the RA area?                                                                                           | No       | Adults are herbivorous feeding on algae and vegetal detritus while juveniles feed on zooplankton and then on bentic                                                                                                                                 | Medium    |
| 27                              | 5.02 | Is the taxon likely to sequester food resources (including nutrients) to the detriment of native taxa in the RA area?                                                        | No       | Less likely                                                                                                                                                                                                                                         | Medium    |
| <b>6. Reproduction</b>          |      |                                                                                                                                                                              |          |                                                                                                                                                                                                                                                     |           |
| 28                              | 6.01 | Is the taxon likely to exhibit parental care and/or to reduce age-at-maturity in response to environmental conditions?                                                       | No       | No. Not documented                                                                                                                                                                                                                                  | Very high |
| 29                              | 6.02 | Is the taxon likely to produce viable gametes or propagules (in the RA area)?                                                                                                | Yes      | Yes. It has been considered as established species since 1930ies                                                                                                                                                                                    | Very high |
| 30                              | 6.03 | Is the taxon likely to hybridise naturally with native taxa?                                                                                                                 | No       | No. Not documented                                                                                                                                                                                                                                  | Very high |
| 31                              | 6.04 | Is the taxon likely to be hermaphroditic or to display asexual reproduction?                                                                                                 | No       | No <a href="https://fishbase.mnhn.fr/summary/Chelon-saliens.html">https://fishbase.mnhn.fr/summary/Chelon-saliens.html</a>                                                                                                                          | Very high |
| 32                              | 6.05 | Is the taxon dependent on the presence of another taxon (or specific habitat features) to complete its life cycle?                                                           | No       | No. this taxon is not dependent on the presence of another taxon to complete its life cycle                                                                                                                                                         | Very high |
| 33                              | 6.06 | Is the taxon known (or likely) to produce a large number of propagules or offspring within a short time span (e.g. < 1 year)?                                                | No       | They mature at the age of 2 or 3 yo.                                                                                                                                                                                                                | Medium    |
| 34                              | 6.07 | How many time units (days, months, years) does the taxon require to reach the age-at-first-reproduction?                                                                     | 2        | males 2 yo. females 3 y.o                                                                                                                                                                                                                           | Medium    |
| <b>7. Dispersal mechanisms</b>  |      |                                                                                                                                                                              |          |                                                                                                                                                                                                                                                     |           |
| 35                              | 7.01 | How many potential internal vectors/pathways could the taxon use to disperse within the RA area (with suitable)                                                              | >1       | Aquaculture; recreational Fisheries;                                                                                                                                                                                                                | Medium    |
| 36                              | 7.02 | Will any of these vectors/pathways bring the taxon in close proximity to one or more protected areas (e.g. MCZ, MPA, SSSI)?                                                  | No       | None of these.                                                                                                                                                                                                                                      | High      |
| 37                              | 7.03 | Does the taxon have a means of actively attaching itself to hard substrata (e.g. ship hulls, pilings, buoys) such that it enhances the likelihood of dispersal?              | No       | No. Morphological traits of this species does not allow it to attach on surgaces <a href="https://fishbase.mnhn.fr/summary/Chelon-saliens.html">https://fishbase.mnhn.fr/summary/Chelon-saliens.html</a>                                            | Very high |
| 38                              | 7.04 | Is natural dispersal of the taxon likely to occur as eggs (for animals) or as propagules (for plants: seeds, spores) in the RA area?                                         | No       | No. It is not the way of the dispersal for this species                                                                                                                                                                                             | High      |
| 39                              | 7.05 | Is natural dispersal of the taxon likely to occur as larvae/juveniles (for animals) or as fragments/seedlings (for plants) in the RA area?                                   | Yes      | It is possible. Juveniles can themselves disperse.                                                                                                                                                                                                  | Medium    |
| 40                              | 7.06 | Are older life stages of the taxon likely to migrate in the RA area for reproduction?                                                                                        | No       | No. Does not migrate                                                                                                                                                                                                                                | High      |
| 41                              | 7.07 | Are propagules or eggs of the taxon likely to be dispersed in the RA area by other animals?                                                                                  | No       | No. this is unlikely.                                                                                                                                                                                                                               | Very high |
| 42                              | 7.08 | Is dispersal of the taxon along any of the vectors/pathways mentioned in the previous seven questions (35-41; i.e. both unintentional or intentional) likely to be           | Yes      | Commercial aquaculture seems to be rapid in this area                                                                                                                                                                                               | High      |
| 43                              | 7.09 | Is dispersal of the taxon density dependent?                                                                                                                                 | No       | No. No data.                                                                                                                                                                                                                                        | Medium    |
| <b>8. Tolerance attributes</b>  |      |                                                                                                                                                                              |          |                                                                                                                                                                                                                                                     |           |
| 44                              | 8.01 | Is the taxon able to withstand being out of water for extended periods (e.g. minimum of one or more hours) at some stage of its life cycle?                                  | No       | Not known. Not likely.                                                                                                                                                                                                                              | High      |
| 45                              | 8.02 | Is the taxon tolerant of a wide range of water quality conditions relevant to that taxon? [In the Justification field, indicate the relevant water quality variable(s) being | Yes      | It can tolerate wide range of temperatures and salinities                                                                                                                                                                                           | Medium    |
| 46                              | 8.03 | Can the taxon be controlled or eradicated in the wild with chemical, biological, or other agents/means?                                                                      | No       | Can not be eradicated. and it will not be, because it has fisheries value                                                                                                                                                                           | Very high |
| 47                              | 8.04 | Is the taxon likely to tolerate or benefit from environmental/human disturbance?                                                                                             | No       | No. Not documented.                                                                                                                                                                                                                                 | Very high |
| 48                              | 8.05 | Is the taxon able to tolerate salinity levels that are higher or lower than those found in its usual environment?                                                            | Yes      | Tolerates salinities lower than 116 ppt                                                                                                                                                                                                             | High      |
| 49                              | 8.06 | Are there effective natural enemies (predators) of the taxon present in the RA                                                                                               | No       | no effective natural enemies exist in RA area                                                                                                                                                                                                       | Very high |
| <b>C. Climate change</b>        |      |                                                                                                                                                                              |          |                                                                                                                                                                                                                                                     |           |
| <b>9. Climate change</b>        |      |                                                                                                                                                                              |          |                                                                                                                                                                                                                                                     |           |
| 50                              | 9.01 | Under the predicted future climatic conditions, are the risks of entry into the RA area posed by the taxon likely to increase, decrease or not change?                       | Increase | It was hypotheses that climate change might alert the mechanisms of transportation and introduction of non-native species. Commercial and recreational activities will increase, that itself increases the propaqueue pressure levels of non-native | Medium    |

|    |      |                                                                                                                                                              |           |                                                                                                                                      |        |
|----|------|--------------------------------------------------------------------------------------------------------------------------------------------------------------|-----------|--------------------------------------------------------------------------------------------------------------------------------------|--------|
| 51 | 9.02 | Under the predicted future climatic conditions, are the risks of establishment posed by the taxon likely to increase, decrease or not change?                | No change | Since this species are very much tolerant to wide range of temperatures their establishment will not decrease, it will stay the same | Medium |
| 52 | 9.03 | Under the predicted future climatic conditions, are the risks of dispersal within the RA area posed by the taxon likely to increase, decrease or not change? | No change | No change                                                                                                                            | Medium |
| 53 | 9.04 | Under the predicted future climatic conditions, what is the likely magnitude of future potential impacts on biodiversity and/or ecological integrity/status? | No change | No change                                                                                                                            | Medium |
| 54 | 9.05 | Under the predicted future climatic conditions, what is the likely magnitude of future potential impacts on ecosystem structure and/or function?             | No change | No change                                                                                                                            | Medium |
| 55 | 9.06 | Under the predicted future climatic conditions, what is the likely magnitude of future potential impacts on ecosystem services/socio-economic factors?       | No change | No change                                                                                                                            | Medium |

| Statistics                                     |             |
|------------------------------------------------|-------------|
| Scores                                         |             |
| <b>BRA</b>                                     | <b>13.0</b> |
| <b>BRA Outcome</b>                             | <b>-</b>    |
| <b>BRA+CCA</b>                                 | <b>15.0</b> |
| <b>BRA+CCA Outcome</b>                         | <b>-</b>    |
| Score partition                                |             |
| <b>A. Biogeography/Historical</b>              | <b>7.0</b>  |
| 1. Domestication/Cultivation                   | 4.0         |
| 2. Climate, distribution and introduction risk | 1.0         |
| 3. Invasive elsewhere                          | 2.0         |
| <b>B. Biology/Ecology</b>                      | <b>6.0</b>  |
| 4. Undesirable (or persistence) traits         | 4.0         |
| 5. Resource exploitation                       | 0.0         |
| 6. Reproduction                                | 0.0         |
| 7. Dispersal mechanisms                        | -1.0        |
| 8. Tolerance attributes                        | 3.0         |
| <b>C. Climate change</b>                       | <b>2.0</b>  |
| 9. Climate change                              | 2.0         |
| Answered Questions                             |             |
| <b>Total</b>                                   | <b>55</b>   |
| <b>A. Biogeography/Historical</b>              | <b>13</b>   |
| 1. Domestication/Cultivation                   | 3           |
| 2. Climate, distribution and introduction risk | 5           |
| 3. Invasive elsewhere                          | 5           |
| <b>B. Biology/Ecology</b>                      | <b>36</b>   |
| 4. Undesirable (or persistence) traits         | 12          |
| 5. Resource exploitation                       | 2           |
| 6. Reproduction                                | 7           |
| 7. Dispersal mechanisms                        | 9           |
| 8. Tolerance attributes                        | 6           |
| <b>C. Climate change</b>                       | <b>6</b>    |
| 9. Climate change                              | 6           |
| Sectors affected                               |             |
| <b>Commercial</b>                              | <b>6</b>    |
| <b>Environmental</b>                           | <b>0</b>    |
| <b>Species or population nuisance traits</b>   | <b>12</b>   |

| Thresholds     |             |
|----------------|-------------|
| <b>BRA</b>     | <b>-</b>    |
| <b>BRA+CCA</b> | <b>-</b>    |
| Confidence     |             |
| <b>BRA+CCA</b> | <b>0.69</b> |
| <b>BRA</b>     | <b>0.71</b> |
| <b>CCA</b>     | <b>0.50</b> |

| Date and Time       |  |
|---------------------|--|
| 20/05/2022 16:14:54 |  |

AS-ISK v2

| Taxon and Assessor details         |                                                                                                                               |
|------------------------------------|-------------------------------------------------------------------------------------------------------------------------------|
| Category                           | Fishes and Lampreys (freshwater)                                                                                              |
| Taxon name                         | <i>Clarias gariepinus</i>                                                                                                     |
| Common name                        | North African catfish                                                                                                         |
| Assessor                           | Bella Japoshvili                                                                                                              |
| Risk screening context             |                                                                                                                               |
| Reason and socio-economic benefits | Species is absent from the RA Area however can be found in neighbour country and is also a subject                            |
| Risk assessment area               | South Caucasus                                                                                                                |
| Taxonomy                           | Actinopteri (ray-finned fishes) > Siluriformes (Catfishes) > Clariidae (Airbreathing catfishes)                               |
| Native range                       | Africa, part of Asia Minor                                                                                                    |
| Introduced range                   | Part of Europe, Asia and south America                                                                                        |
| URL                                | <a href="https://www.fishbase.de/summary/Clarias-gariepinus.html">https://www.fishbase.de/summary/Clarias-gariepinus.html</a> |

|                                                |      |                                                                                                                                                                         | Response | Justification (references and/or other information)                                                                                                                                                                                                                                                                                                                                                         | Confidence |
|------------------------------------------------|------|-------------------------------------------------------------------------------------------------------------------------------------------------------------------------|----------|-------------------------------------------------------------------------------------------------------------------------------------------------------------------------------------------------------------------------------------------------------------------------------------------------------------------------------------------------------------------------------------------------------------|------------|
| A. Biogeography/Historical                     |      |                                                                                                                                                                         |          |                                                                                                                                                                                                                                                                                                                                                                                                             |            |
| 1. Domestication/Cultivation                   |      |                                                                                                                                                                         |          |                                                                                                                                                                                                                                                                                                                                                                                                             |            |
| 1                                              | 1.01 | Has the taxon been the subject of domestication (or cultivation) for at least 20 generations?                                                                           | Yes      | Romanova, E. M., Lyubomirova, V. N., Romanov, V. V., Mukhitova, M. E., Shlenkina, T. M., Shadyeva, L. A., & Galushko, I. S. (2018). Biology of reproduction of catfish (CLARIAS GARIEPINUS, BURCHELL, 1822) in high-tech industrial aquaculture. Journal of fundamental and applied sciences, 10(5S), 1116-1129.                                                                                            | Very high  |
| 2                                              | 1.02 | Is the taxon harvested in the wild and likely to be sold or used in its live form?                                                                                      | Yes      | Okonkwo, C. O., Onyenweaku, E., & Uwujibha, J. O. Comparative Assessment of Nutrient Composition of Aquacultured and Wild Catfish (Clarias gariepinus) in Cross Rivers State Nigeria.                                                                                                                                                                                                                       | High       |
| 3                                              | 1.03 | Does the taxon have invasive races, varieties, sub-taxa or congeners?                                                                                                   | Yes      | Congeners                                                                                                                                                                                                                                                                                                                                                                                                   | Very high  |
| 2. Climate, distribution and introduction risk |      |                                                                                                                                                                         |          |                                                                                                                                                                                                                                                                                                                                                                                                             |            |
| 4                                              | 2.01 | How similar are the climatic conditions of the Risk Assessment (RA) area and the taxon's native range?                                                                  | Low      | Results of climatch algorithm                                                                                                                                                                                                                                                                                                                                                                               | Medium     |
| 5                                              | 2.02 | What is the quality of the climate matching data?                                                                                                                       | Low      | Due to low accuracy of local climate data                                                                                                                                                                                                                                                                                                                                                                   | High       |
| 6                                              | 2.03 | Is the taxon already present outside of captivity in the RA area?                                                                                                       | No       | CABI, 2021. Clarias gariepinus (North African catfish). <a href="https://www.cabi.org/isc/datasheet/88683">https://www.cabi.org/isc/datasheet/88683</a> (accessed October                                                                                                                                                                                                                                   | Very high  |
| 7                                              | 2.04 | How many potential vectors could the taxon use to enter in the RA area?                                                                                                 | >1       | Aquacultural and recreatinal purpose. It can also reach the South Caucasus naturally via transboundary rivers                                                                                                                                                                                                                                                                                               | High       |
| 8                                              | 2.05 | Is the taxon currently found in close proximity to, and likely to enter into, the RA area in the near future (e.g. unintentional and intentional introductions)?        | Yes      | It is known from neighbour country (Turkey) and can easily be imported in Georgia                                                                                                                                                                                                                                                                                                                           | Medium     |
| 3. Invasive elsewhere                          |      |                                                                                                                                                                         |          |                                                                                                                                                                                                                                                                                                                                                                                                             |            |
| 9                                              | 3.01 | Has the taxon become naturalised (established viable populations) outside its                                                                                           | Yes      | CABI, 2021. Clarias gariepinus (North African catfish). <a href="https://www.cabi.org/isc/datasheet/88683">https://www.cabi.org/isc/datasheet/88683</a> (accessed October                                                                                                                                                                                                                                   | Very high  |
| 10                                             | 3.02 | In the taxon's introduced range, are there known adverse impacts to wild stocks or commercial taxa?                                                                     | Yes      | Radhakrishnan, K. V., Lan, Z. J., Zhao, J., Qing, N., & Huang, X. L. (2011). Invasion of the African sharp-tooth catfish Clarias gariepinus (Burchell, 1822) in South China. Biological Invasions, 13(8), 1723-1727; Weyl, O. L. F., Daga, V. S., Ellender, B. R., & Vitule, J. R. S. (2016). A review of Clarias gariepinus invasions in Brazil and South Africa. Journal of fish biology, 89(1), 386-402. | Medium     |
| 11                                             | 3.03 | In the taxon's introduced range, are there known adverse impacts to aquaculture?                                                                                        | No       | No documented evidence                                                                                                                                                                                                                                                                                                                                                                                      | Low        |
| 12                                             | 3.04 | In the taxon's introduced range, are there known adverse impacts to ecosystem services?                                                                                 | Yes      | Radhakrishnan, K. V., Lan, Z. J., Zhao, J., Qing, N., & Huang, X. L. (2011). Invasion of the African sharp-tooth catfish Clarias gariepinus (Burchell, 1822) in South China. Biological Invasions, 13(8), 1723-1727. though Not well documented                                                                                                                                                             | Medium     |
| 13                                             | 3.05 | In the taxon's introduced range, are there known adverse socio-economic impacts?                                                                                        | No       | Not well documented                                                                                                                                                                                                                                                                                                                                                                                         | Low        |
| B. Biology/Ecology                             |      |                                                                                                                                                                         |          |                                                                                                                                                                                                                                                                                                                                                                                                             |            |
| 4. Undesirable (or persistence) traits         |      |                                                                                                                                                                         |          |                                                                                                                                                                                                                                                                                                                                                                                                             |            |
| 14                                             | 4.01 | Is it likely that the taxon will be poisonous or pose other risks to human health?                                                                                      | No       | Not a harmful species                                                                                                                                                                                                                                                                                                                                                                                       | Medium     |
| 15                                             | 4.02 | Is it likely that the taxon will smother one or more native taxa (that are not threatened or protected)?                                                                | Yes      | Not well documented though                                                                                                                                                                                                                                                                                                                                                                                  | Low        |
| 16                                             | 4.03 | Are there any threatened or protected taxa that the non-native taxon would parasitise in the RA area?                                                                   | Yes      | Since the catfish are predator, it can consume a variety of freshwater fish and invertebrates in the RA area                                                                                                                                                                                                                                                                                                | Medium     |
| 17                                             | 4.04 | Is the taxon adaptable in terms of climatic and other environmental conditions, thus enhancing its potential persistence if it has invaded or could invade the RA area? | Yes      | CABI, 2021. Clarias gariepinus (North African catfish). <a href="https://www.cabi.org/isc/datasheet/88683">https://www.cabi.org/isc/datasheet/88683</a> (accessed October 2021)                                                                                                                                                                                                                             | Low        |
| 18                                             | 4.05 | Is the taxon likely to disrupt food-web structure/function in aquatic ecosystems if it has invaded or is likely to invade the RA                                        | Yes      | Expected, professional judgement                                                                                                                                                                                                                                                                                                                                                                            | Low        |
| 19                                             | 4.06 | Is the taxon likely to exert adverse impacts on ecosystem services in the RA area?                                                                                      | Yes      | Possible through reducing the economically important fish diversity and also through affecting the ecosystem structure (e.g. Radhakrishnan, K. V., Lan, Z. J., Zhao, J., Qing, N., & Huang, X. L. (2011). Invasion of the African sharp-tooth catfish Clarias gariepinus (Burchell, 1822) in South China. Biological Invasions, 13(8), 1723-1727.)                                                          | Medium     |
| 20                                             | 4.07 | Is it likely that the taxon will host, and/or act as a vector for, recognised pests and infectious agents that are endemic in the RA                                    | No       | Not expected based on professional judgement                                                                                                                                                                                                                                                                                                                                                                | Medium     |

|                                 |      |                                                                                                                                                                    |     |                                                                                                                                                                                                                                                                                                                                                                                                                                                                                                                                                                           |           |
|---------------------------------|------|--------------------------------------------------------------------------------------------------------------------------------------------------------------------|-----|---------------------------------------------------------------------------------------------------------------------------------------------------------------------------------------------------------------------------------------------------------------------------------------------------------------------------------------------------------------------------------------------------------------------------------------------------------------------------------------------------------------------------------------------------------------------------|-----------|
| 21                              | 4.08 | Is it likely that the taxon will host, and/or act as a vector for, recognised pests and infectious agents that are absent from (novel to) the RA area?             | Yes | e.g Akinsanya, B., & Otubanjo, O. A. (2006). Helminth Parasites of <i>Clarias gariepinus</i> (Clariidae) in Lekki Lagoon, Lagos, Nigeria. <i>Revista de biología tropical</i> , 54(1), 93-99; Oniye, S. J., Adebote, D. A., & Ayanda, O. I. (2004). Helminth parasites of <i>Clarias gariepinus</i> (Teugels) in Zaria, Nigeria. <i>Journal of Aquatic Sciences</i> , <a href="https://www.fishbase.de/summary/Clarias-gariepinus.html">https://www.fishbase.de/summary/Clarias-gariepinus.html</a>                                                                       | Very high |
| 22                              | 4.09 | Is it likely that the taxon will achieve a body size that will make it more likely to be released from captivity?                                                  | Yes |                                                                                                                                                                                                                                                                                                                                                                                                                                                                                                                                                                           | Very high |
| 23                              | 4.10 | Is the taxon capable of sustaining itself in a range of water velocity conditions (e.g. versatile in habitat use)?                                                 | No  | <a href="https://www.fishbase.de/summary/Clarias-gariepinus.html">https://www.fishbase.de/summary/Clarias-gariepinus.html</a>                                                                                                                                                                                                                                                                                                                                                                                                                                             | Medium    |
| 24                              | 4.11 | Is it likely that the taxon's mode of existence (e.g. excretion of by-products) or behaviours (e.g. feeding) will reduce habitat quality for native taxa?          | Yes | Expected but not well documented                                                                                                                                                                                                                                                                                                                                                                                                                                                                                                                                          | Low       |
| 25                              | 4.12 | Is the taxon likely to maintain a viable population even when present in low densities (or persisting in adverse conditions by way of a dormant form)?             | No  | Not such an information                                                                                                                                                                                                                                                                                                                                                                                                                                                                                                                                                   | Low       |
| <b>5. Resource exploitation</b> |      |                                                                                                                                                                    |     |                                                                                                                                                                                                                                                                                                                                                                                                                                                                                                                                                                           |           |
| 26                              | 5.01 | Is the taxon likely to consume threatened or protected native taxa in the RA area?                                                                                 | Yes | Polyphagous predator - <a href="https://www.fishbase.de/summary/Clarias-gariepinus.html">https://www.fishbase.de/summary/Clarias-gariepinus.html</a>                                                                                                                                                                                                                                                                                                                                                                                                                      | Very high |
| 27                              | 5.02 | Is the taxon likely to sequester food resources (including nutrients) to the detriment of native taxa in the RA area?                                              | Yes | This includes native cat fish, however no RIP value have been calculated.                                                                                                                                                                                                                                                                                                                                                                                                                                                                                                 | Low       |
| <b>6. Reproduction</b>          |      |                                                                                                                                                                    |     |                                                                                                                                                                                                                                                                                                                                                                                                                                                                                                                                                                           |           |
| 28                              | 6.01 | Is the taxon likely to exhibit parental care and/or to reduce age-at-maturity in response to environmental conditions?                                             | No  | Haylor, G. S. (1989). The case for the African catfish, <i>Clarias gariepinus</i> Burchell, 1822, Clariidae: a comparison of the relative merits of Tilapiine fishes, especially <i>Oreochromis niloticus</i> (L.) and <i>C. gariepinus</i> Burchell, for African aquaculture. <i>Aquaculture Research</i> , 20(3), 279-285.                                                                                                                                                                                                                                              | Medium    |
| 29                              | 6.02 | Is the taxon likely to produce viable gametes or propagules (in the RA area)?                                                                                      | No  | Not cultured or released in the RA area until yet                                                                                                                                                                                                                                                                                                                                                                                                                                                                                                                         | Low       |
| 30                              | 6.03 | Is the taxon likely to hybridise naturally with native taxa?                                                                                                       | Yes | Maneechot, N., Yano, C. F., Bertollo, L. A. C., Getlekha, N., Molina, W. F., Ditcharoen, S., ... & de Bello Cioffi, M. (2016). Genomic organization of repetitive DNAs highlights chromosomal evolution in the genus <i>Clarias</i> (Clariidae, Siluriformes). <i>Molecular cytogenetics</i> , 9(1), 1-10.                                                                                                                                                                                                                                                                | Very high |
| 31                              | 6.04 | Is the taxon likely to be hermaphroditic or to display asexual reproduction?                                                                                       | No  | No such an evidence. Species is sexual                                                                                                                                                                                                                                                                                                                                                                                                                                                                                                                                    | High      |
| 32                              | 6.05 | Is the taxon dependent on the presence of another taxon (or specific habitat features) to complete its life cycle?                                                 | No  | Not such an evidence is known. Species is polyphagous and no other particular species is needed for any stage of life cycle                                                                                                                                                                                                                                                                                                                                                                                                                                               | Very high |
| 33                              | 6.06 | Is the taxon known (or likely) to produce a large number of propagules or offspring within a short time span (e.g. < 1 year)?                                      | Yes | Haylor, G. S. (1989). The case for the African catfish, <i>Clarias gariepinus</i> Burchell, 1822, Clariidae: a comparison of the relative merits of Tilapiine fishes, especially <i>Oreochromis niloticus</i> (L.) and <i>C. gariepinus</i> Burchell, for African aquaculture. <i>Aquaculture Research</i> , 20(3), 279-285.                                                                                                                                                                                                                                              | High      |
| 34                              | 6.07 | How many time units (days, months, years) does the taxon require to reach the age-at-first-reproduction?                                                           | 1   | Legendre, M., Teugels, G. G., Cauty, C., & Jalabert, B. (1992). A comparative study on morphology, growth rate and reproduction of <i>Clarias gariepinus</i> (Burchell, 1822), <i>Heterobranchius longifilis</i> Valenciennes, 1840, and their reciprocal hybrids (Pisces, Clariidae). <i>Journal of Fish Biology</i> , 40(1), 59-79; YALÇIN, Ş. Ö., Solak, K., & Akyurt, İ. (2001). Certain reproductive characteristics of the catfish ( <i>Clarias gariepinus</i> Burchell, 1822) living in the River Asi, Turkey. <i>Turkish Journal of Zoology</i> , 25(4), 453-460. | High      |
| <b>7. Dispersal mechanisms</b>  |      |                                                                                                                                                                    |     |                                                                                                                                                                                                                                                                                                                                                                                                                                                                                                                                                                           |           |
| 35                              | 7.01 | How many potential internal vectors/pathways could the taxon use to disperse within the RA area (with suitable protected areas (e.g. MCZ, MPA, SSSI)?              | >1  | Species is introduced intentionally for a aquacultural purpose as well as it can also spread by its own. Not a documented evidence for the RA area                                                                                                                                                                                                                                                                                                                                                                                                                        | Medium    |
| 36                              | 7.02 | Will any of these vectors/pathways bring the taxon in close proximity to one or more protected areas (e.g. MCZ, MPA, SSSI)?                                        | Yes | Professional judgement, not a documented evidence                                                                                                                                                                                                                                                                                                                                                                                                                                                                                                                         | Low       |
| 37                              | 7.03 | Does the taxon have a means of actively attaching itself to hard substrata (e.g. ship hulls, pilings, buoys) such that it enhances the likelihood of dispersal?    | No  | No such an evidence exists                                                                                                                                                                                                                                                                                                                                                                                                                                                                                                                                                | Very high |
| 38                              | 7.04 | Is natural dispersal of the taxon likely to occur as eggs (for animals) or as propagules (for plants: seeds, spores) in the RA area?                               | No  | No such an evidence exists                                                                                                                                                                                                                                                                                                                                                                                                                                                                                                                                                | High      |
| 39                              | 7.05 | Is natural dispersal of the taxon likely to occur as larvae/juveniles (for animals) or as fragments/seedlings (for plants) in the RA area?                         | Yes | Juveniles are active swimmers                                                                                                                                                                                                                                                                                                                                                                                                                                                                                                                                             | High      |
| 40                              | 7.06 | Are older life stages of the taxon likely to migrate in the RA area for reproduction?                                                                              | No  | Not such an evidence is known                                                                                                                                                                                                                                                                                                                                                                                                                                                                                                                                             | High      |
| 41                              | 7.07 | Are propagules or eggs of the taxon likely to be dispersed in the RA area by other animals?                                                                        | No  | No such an evidence is known                                                                                                                                                                                                                                                                                                                                                                                                                                                                                                                                              | High      |
| 42                              | 7.08 | Is dispersal of the taxon along any of the vectors/pathways mentioned in the previous seven questions (35-41; i.e. both unintentional or intentional) likely to be | Yes | Professional judgement, not a documented evidence                                                                                                                                                                                                                                                                                                                                                                                                                                                                                                                         | Low       |
| 43                              | 7.09 | Is dispersal of the taxon density dependent?                                                                                                                       | No  | No such case is known                                                                                                                                                                                                                                                                                                                                                                                                                                                                                                                                                     | Low       |
| <b>8. Tolerance attributes</b>  |      |                                                                                                                                                                    |     |                                                                                                                                                                                                                                                                                                                                                                                                                                                                                                                                                                           |           |



|    |      |                                                                                                                                                                              |     |                                                                                                                                                                                                         |           |
|----|------|------------------------------------------------------------------------------------------------------------------------------------------------------------------------------|-----|---------------------------------------------------------------------------------------------------------------------------------------------------------------------------------------------------------|-----------|
| 44 | 8.01 | Is the taxon able to withstand being out of water for extended periods (e.g. minimum of one or more hours) at some stage of its life cycle?                                  | Yes | <a href="https://www.fishbase.de/summary/Clarias-gariepinus.html">https://www.fishbase.de/summary/Clarias-gariepinus.html</a>                                                                           | High      |
| 45 | 8.02 | Is the taxon tolerant of a wide range of water quality conditions relevant to that taxon? [In the Justification field, indicate the relevant water quality variable(s) being | Yes | Oxygen, temperature, turbidity                                                                                                                                                                          | Very high |
| 46 | 8.03 | Can the taxon be controlled or eradicated in the wild with chemical, biological, or other agents/means?                                                                      | No  | Not known such cases                                                                                                                                                                                    | High      |
| 47 | 8.04 | Is the taxon likely to tolerate or benefit from environmental/human disturbance?                                                                                             | No  | Not such an evidence is known                                                                                                                                                                           | Medium    |
| 48 | 8.05 | Is the taxon able to tolerate salinity levels that are higher or lower than those found in its usual environment?                                                            | Yes | Britz, P. J., & Hecht, T. (1989). Effects of salinity on growth and survival of African sharptooth catfish ( <i>Clarias gariepinus</i> ) larvae. <i>Journal of applied ichthyology</i> , 5(4), 194-202. | High      |
| 49 | 8.06 | Are there effective natural enemies (predators) of the taxon present in the RA                                                                                               | No  | No effective natural enemies from the RA area is known                                                                                                                                                  | High      |

#### C. Climate change

##### 9. Climate change

|    |      |                                                                                                                                                              |           |                                               |        |
|----|------|--------------------------------------------------------------------------------------------------------------------------------------------------------------|-----------|-----------------------------------------------|--------|
| 50 | 9.01 | Under the predicted future climatic conditions, are the risks of entry into the RA area posed by the taxon likely to increase, decrease or not change?       | No change | No enough information, professional judgement | Low    |
| 51 | 9.02 | Under the predicted future climatic conditions, are the risks of establishment posed by the taxon likely to increase, decrease or not change?                | Increase  | No enough information, professional judgement | Medium |
| 52 | 9.03 | Under the predicted future climatic conditions, are the risks of dispersal within the RA area posed by the taxon likely to increase, decrease or not change? | Increase  | No enough information, professional judgement | Medium |
| 53 | 9.04 | Under the predicted future climatic conditions, what is the likely magnitude of future potential impacts on biodiversity and/or ecological integrity/status? | Higher    | No enough information, professional judgement | Low    |
| 54 | 9.05 | Under the predicted future climatic conditions, what is the likely magnitude of future potential impacts on ecosystem structure and/or function?             | Higher    | No enough information, professional judgement | Medium |
| 55 | 9.06 | Under the predicted future climatic conditions, what is the likely magnitude of future potential impacts on ecosystem services/socio-economic factors?       | Higher    | No enough information, professional judgement | Low    |

| Statistics                                     |             |
|------------------------------------------------|-------------|
| Scores                                         |             |
| <b>BRA</b>                                     | <b>38.0</b> |
| <b>BRA Outcome</b>                             | -           |
| <b>BRA+CCA</b>                                 | <b>48.0</b> |
| <b>BRA+CCA Outcome</b>                         | -           |
| Score partition                                |             |
| <b>A. Biogeography/Historical</b>              | <b>15.0</b> |
| 1. Domestication/Cultivation                   | 4.0         |
| 2. Climate, distribution and introduction risk | 1.0         |
| 3. Invasive elsewhere                          | 10.0        |
| <b>B. Biology/Ecology</b>                      | <b>23.0</b> |
| 4. Undesirable (or persistence) traits         | 8.0         |
| 5. Resource exploitation                       | 7.0         |
| 6. Reproduction                                | 3.0         |
| 7. Dispersal mechanisms                        | 0.0         |
| 8. Tolerance attributes                        | 5.0         |
| <b>C. Climate change</b>                       | <b>10.0</b> |
| 9. Climate change                              | 10.0        |
| Answered Questions                             |             |
| <b>Total</b>                                   | <b>55</b>   |
| <b>A. Biogeography/Historical</b>              | <b>13</b>   |
| 1. Domestication/Cultivation                   | 3           |
| 2. Climate, distribution and introduction risk | 5           |
| 3. Invasive elsewhere                          | 5           |
| <b>B. Biology/Ecology</b>                      | <b>36</b>   |
| 4. Undesirable (or persistence) traits         | 12          |
| 5. Resource exploitation                       | 2           |
| 6. Reproduction                                | 7           |
| 7. Dispersal mechanisms                        | 9           |
| 8. Tolerance attributes                        | 6           |
| <b>C. Climate change</b>                       | <b>6</b>    |
| 9. Climate change                              | 6           |
| Sectors affected                               |             |
| <b>Commercial</b>                              | <b>12</b>   |
| <b>Environmental</b>                           | <b>17</b>   |
| <b>Species or population nuisance traits</b>   | <b>23</b>   |

| Thresholds |   |
|------------|---|
| <b>BRA</b> | - |

|                   |                |             |
|-------------------|----------------|-------------|
|                   | <b>BRA+CCA</b> | <b>-</b>    |
| <b>Confidence</b> |                |             |
|                   | <b>BRA+CCA</b> | <b>0.60</b> |
|                   | <b>BRA</b>     | <b>0.62</b> |
|                   | <b>CCA</b>     | <b>0.38</b> |

|                            |  |
|----------------------------|--|
| <b>Date and Time</b>       |  |
| <b>04/05/2022 13:46:56</b> |  |

## AS-ISK v2

| Taxon and Assessor details         |                                                                                                     |
|------------------------------------|-----------------------------------------------------------------------------------------------------|
| Category                           | Fishes and Lampreys (freshwater)                                                                    |
| Taxon name                         | <i>Clarias gariepinus</i>                                                                           |
| Common name                        | North African catfish                                                                               |
| Assessor                           | Giorgi Epitashvili                                                                                  |
| Risk screening context             |                                                                                                     |
| Reason and socio-economic benefits | The African sharptooth catfish was introduced all over the world in the early 1980s for aquaculture |
| Risk assessment area               | South Caucasus                                                                                      |
| Taxonomy                           | <i>Clarias gariepinus</i> (Burchell, 1822)                                                          |
| Native range                       | Africa: almost Pan-Africa, absent from Maghreb, the Upper and (most of the) Lower Guinea and the    |
| Introduced range                   | Widely introduced to other parts of Africa, Europe and Asia.                                        |
| URL                                | <a href="https://www.fishbase.se/summary/1934">https://www.fishbase.se/summary/1934</a>             |

|                                                |      |                                                                                                                                                                         | Response | Justification (references and/or other information)                                                                                                                                                                                                                                                                                                                                                                                                                                                                                                                                                                                                                                                                     | Confidence |
|------------------------------------------------|------|-------------------------------------------------------------------------------------------------------------------------------------------------------------------------|----------|-------------------------------------------------------------------------------------------------------------------------------------------------------------------------------------------------------------------------------------------------------------------------------------------------------------------------------------------------------------------------------------------------------------------------------------------------------------------------------------------------------------------------------------------------------------------------------------------------------------------------------------------------------------------------------------------------------------------------|------------|
| A. Biogeography/Historical                     |      |                                                                                                                                                                         |          |                                                                                                                                                                                                                                                                                                                                                                                                                                                                                                                                                                                                                                                                                                                         |            |
| 1. Domestication/Cultivation                   |      |                                                                                                                                                                         |          |                                                                                                                                                                                                                                                                                                                                                                                                                                                                                                                                                                                                                                                                                                                         |            |
| 1                                              | 1.01 | Has the taxon been the subject of domestication (or cultivation) for at least 20 generations?                                                                           | Yes      | C. garepinus was introduced all over the world in the early 1980s for aquaculture purposes.                                                                                                                                                                                                                                                                                                                                                                                                                                                                                                                                                                                                                             | Very high  |
| 2                                              | 1.02 | Is the taxon harvested in the wild and likely to be sold or used in its live form?                                                                                      | Yes      | The price of catfish fingerlings remains high (USD 0.15-0.25 each in Cameroon) and most farmers prefer to collect wild seed when available.                                                                                                                                                                                                                                                                                                                                                                                                                                                                                                                                                                             | Very high  |
| 3                                              | 1.03 | Does the taxon have invasive races, varieties, sub-taxa or congeners?                                                                                                   | Yes      | C. gariepinus has all the qualities of an aggressive and successful invasive species. Its high fecundity, flexible phenotype, rapid growth, wide habitat preferences, tolerance to extreme water conditions and the ability to subsist on a wide variety of prey can devastate indigenous fish and aquatic invertebrate populations                                                                                                                                                                                                                                                                                                                                                                                     | Very high  |
| 2. Climate, distribution and introduction risk |      |                                                                                                                                                                         |          |                                                                                                                                                                                                                                                                                                                                                                                                                                                                                                                                                                                                                                                                                                                         |            |
| 4                                              | 2.01 | How similar are the climatic conditions of the Risk Assessment (RA) area and the taxon's native range?                                                                  | Low      | World Map of the Köppen-Geiger climate classification                                                                                                                                                                                                                                                                                                                                                                                                                                                                                                                                                                                                                                                                   | Medium     |
| 5                                              | 2.02 | What is the quality of the climate matching data?                                                                                                                       | Low      | World Map of the Köppen-Geiger climate classification                                                                                                                                                                                                                                                                                                                                                                                                                                                                                                                                                                                                                                                                   | Medium     |
| 6                                              | 2.03 | Is the taxon already present outside of captivity in the RA area?                                                                                                       | No       | Currently this species does not occurring in the SC region.                                                                                                                                                                                                                                                                                                                                                                                                                                                                                                                                                                                                                                                             | Very high  |
| 7                                              | 2.04 | How many potential vectors could the taxon use to enter in the RA area?                                                                                                 | One      | This species can enter in the region only for aquacultural purposes.                                                                                                                                                                                                                                                                                                                                                                                                                                                                                                                                                                                                                                                    | Medium     |
| 8                                              | 2.05 | Is the taxon currently found in close proximity to, and likely to enter into, the RA area in the near future (e.g. unintentional and intentional introductions)?        | Yes      | This species is distributed in the southern part of Turkey (Turan, 2016).                                                                                                                                                                                                                                                                                                                                                                                                                                                                                                                                                                                                                                               | Very high  |
| 3. Invasive elsewhere                          |      |                                                                                                                                                                         |          |                                                                                                                                                                                                                                                                                                                                                                                                                                                                                                                                                                                                                                                                                                                         |            |
| 9                                              | 3.01 | Has the taxon become naturalised (established viable populations) outside its native range?                                                                             | Yes      | This review of introductions, establishment, spread and impact of C. gariepinus in Brazil and outside of its native range in South Africa provides evidence that the species has been able to overcome all barriers to invasion in both countries (Weyl et al.                                                                                                                                                                                                                                                                                                                                                                                                                                                          | Very high  |
| 10                                             | 3.02 | In the taxon's introduced range, are there known adverse impacts to wild stocks or commercial taxa?                                                                     | Yes      | Clarias gariepinus has all the qualities of an aggressive and successful invasive species. Its high fecundity, flexible phenotype, rapid growth, wide habitat preferences, tolerance to extreme water conditions and the ability to subsist on a wide variety of prey can devastate indigenous fish and aquatic invertebrate populations (Bruton, 1986). It is because of these characteristics that countries such as India have imposed a ban on the introduction and culture of C. gariepinus (Dhawan and Kaur, 2001). Nevertheless, the effects of the illegal and indiscriminate introduction of this fish into India, as in other countries, have brought about potential ecological problems such as the loss of | Very high  |
| 11                                             | 3.03 | In the taxon's introduced range, are there known adverse impacts to aquaculture?                                                                                        | Yes      | C. gariepinus is one of the most suitable species for aquaculture in the world. (Hecht et al., 1995). It is a fast-growing species and probably has adverse impacts on aquaculture.                                                                                                                                                                                                                                                                                                                                                                                                                                                                                                                                     | Low        |
| 12                                             | 3.04 | In the taxon's introduced range, are there known adverse impacts to ecosystem services?                                                                                 | Yes      | The most decisive economic parameter is the low selling price of C. gariepinus (2.20 EUR/kg whole fish), which affects the returns by ±70,463 EUR/year for every ten percent (0.22 EUR) price change. Among the variable costs, feed has by far the largest impact with a share of 61.4% (42.1% of total costs) (Pasch and                                                                                                                                                                                                                                                                                                                                                                                              | Medium     |
| 13                                             | 3.05 | In the taxon's introduced range, are there known adverse socio-economic impacts?                                                                                        | Yes      | Data deficient                                                                                                                                                                                                                                                                                                                                                                                                                                                                                                                                                                                                                                                                                                          | Low        |
| B. Biology/Ecology                             |      |                                                                                                                                                                         |          |                                                                                                                                                                                                                                                                                                                                                                                                                                                                                                                                                                                                                                                                                                                         |            |
| 4. Undesirable (or persistence) traits         |      |                                                                                                                                                                         |          |                                                                                                                                                                                                                                                                                                                                                                                                                                                                                                                                                                                                                                                                                                                         |            |
| 14                                             | 4.01 | Is it likely that the taxon will be poisonous or pose other risks to human health?                                                                                      | No       | This fish does not pose a threat to humans                                                                                                                                                                                                                                                                                                                                                                                                                                                                                                                                                                                                                                                                              | High       |
| 15                                             | 4.02 | Is it likely that the taxon will smother one or more native taxa (that are not threatened or protected)?                                                                | Yes      | Clarias gariepinus has all the qualities of an aggressive and successful invasive species. Its high fecundity, flexible phenotype, rapid growth, wide habitat preferences, tolerance to extreme water conditions and the ability to subsist on a wide variety of prey can devastate indigenous fish and aquatic invertebrate                                                                                                                                                                                                                                                                                                                                                                                            | Medium     |
| 16                                             | 4.03 | Are there any threatened or protected taxa that the non-native taxon would parasitise in the RA area?                                                                   | Yes      | There are several protected and threatened species in the SC region who may have been harmed by these fish: Acipenser spp, Salmo spp, Luciobarbus capito, etc.                                                                                                                                                                                                                                                                                                                                                                                                                                                                                                                                                          | Very high  |
| 17                                             | 4.04 | Is the taxon adaptable in terms of climatic and other environmental conditions, thus enhancing its potential persistence if it has invaded or could invade the RA area? | Yes      | The probability of this is high                                                                                                                                                                                                                                                                                                                                                                                                                                                                                                                                                                                                                                                                                         | High       |

|                                 |      |                                                                                                                                                                    |                |                                                                                                                                                                                                                                                                                                                                                                                                                                                  |           |
|---------------------------------|------|--------------------------------------------------------------------------------------------------------------------------------------------------------------------|----------------|--------------------------------------------------------------------------------------------------------------------------------------------------------------------------------------------------------------------------------------------------------------------------------------------------------------------------------------------------------------------------------------------------------------------------------------------------|-----------|
| 18                              | 4.05 | Is the taxon likely to disrupt food-web structure/function in aquatic ecosystems if it has invaded or is likely to invade the RA                                   | Yes            | The probability of this is high                                                                                                                                                                                                                                                                                                                                                                                                                  | Very high |
| 19                              | 4.06 | Is the taxon likely to exert adverse impacts on ecosystem services in the RA area?                                                                                 | Yes            | The probability of this is high                                                                                                                                                                                                                                                                                                                                                                                                                  | High      |
| 20                              | 4.07 | Is it likely that the taxon will host, and/or act as a vector for, recognised pests and infectious agents that are endemic in the RA                               | Yes            | There is a possibility of that                                                                                                                                                                                                                                                                                                                                                                                                                   | Low       |
| 21                              | 4.08 | Is it likely that the taxon will host, and/or act as a vector for, recognised pests and infectious agents that are absent from (novel to) the RA area?             | Not applicable | There is a possibility of that                                                                                                                                                                                                                                                                                                                                                                                                                   | Low       |
| 22                              | 4.09 | Is it likely that the taxon will achieve a body size that will make it more likely to be released from captivity?                                                  | Yes            | Max length is 170 cm TL male/unsexed; common length : 90.0 cm NG male/unsexed; max. published weight: 60.0 kg. This species is actively used in aquaculture.                                                                                                                                                                                                                                                                                     | Very high |
| 23                              | 4.10 | Is the taxon capable of sustaining itself in a range of water velocity conditions (e.g. versatile in habitat use)?                                                 | Yes            | Adults occur mainly in quiet waters, lakes and pools and prefer rather shallow and swampy areas with a soft muddy substrate and calmer water. They may also occur in fast flowing rivers and in                                                                                                                                                                                                                                                  | Very high |
| 24                              | 4.11 | Is it likely that the taxon's mode of existence (e.g. excretion of by-products) or behaviours (e.g. feeding) will reduce habitat quality for native taxa?          | Yes            | Data deficient                                                                                                                                                                                                                                                                                                                                                                                                                                   | Medium    |
| 25                              | 4.12 | Is the taxon likely to maintain a viable population even when present in low densities (or persisting in adverse conditions by way of a dormant form)?             | Yes            | Data deficient                                                                                                                                                                                                                                                                                                                                                                                                                                   | Low       |
| <b>5. Resource exploitation</b> |      |                                                                                                                                                                    |                |                                                                                                                                                                                                                                                                                                                                                                                                                                                  |           |
| 26                              | 5.01 | Is the taxon likely to consume threatened or protected native taxa in the RA area?                                                                                 | Yes            | The probability of this is high because C. garepinus is a predator fish.                                                                                                                                                                                                                                                                                                                                                                         | Very high |
| 27                              | 5.02 | Is the taxon likely to sequester food resources (including nutrients) to the detriment of native taxa in the RA area?                                              | Yes            | The probability of this is high because C. garepinus is a predator fish.                                                                                                                                                                                                                                                                                                                                                                         | Very high |
| <b>6. Reproduction</b>          |      |                                                                                                                                                                    |                |                                                                                                                                                                                                                                                                                                                                                                                                                                                  |           |
| 28                              | 6.01 | Is the taxon likely to exhibit parental care and/or to reduce age-at-maturity in response to environmental conditions?                                             | Yes            | The male guards the nest from predators, such as the clown loach (Chromobotia macracanthus) and yoyo loach (Botia lohachata), immediately following spawning. The female will return once the eggs have hatched and the male and female take part in protecting the fry until they are independent. The parental investment only extends to 24 hours following the hatching. By the third day, the fry are capable of swimming strongly and they | High      |
| 29                              | 6.02 | Is the taxon likely to produce viable gametes or propagules (in the RA area)?                                                                                      | No             | This species does not reproduces in the SC region                                                                                                                                                                                                                                                                                                                                                                                                | Very high |
| 30                              | 6.03 | Is the taxon likely to hybridise naturally with native taxa?                                                                                                       | Yes            | Genetic introgression of native wild clariid catfish by escapees of hybrid catfish (C. garepinus x C. macrocephalus) from fish farms have been reported in Thailand (Senanan et al. 2004).                                                                                                                                                                                                                                                       | Very high |
| 31                              | 6.04 | Is the taxon likely to be hermaphroditic or to display asexual reproduction?                                                                                       | Yes            | This is the first histological evidence of intersex in a fish species inhabiting a South African water source (C. garepinus) (Barnhoorn et al. 2004).                                                                                                                                                                                                                                                                                            | High      |
| 32                              | 6.05 | Is the taxon dependent on the presence of another taxon (or specific habitat features) to complete its life cycle?                                                 | No             | No such data has been known                                                                                                                                                                                                                                                                                                                                                                                                                      | Medium    |
| 33                              | 6.06 | Is the taxon known (or likely) to produce a large number of propagules or offspring within a short time span (e.g. < 1 year)?                                      | Yes            | A modal size female produces about 50,000 eggs, but large females may produce over 150,000 eggs (Bruton 1979).                                                                                                                                                                                                                                                                                                                                   | High      |
| 34                              | 6.07 | How many time units (days, months, years) does the taxon require to reach the age-at-first-reproduction?                                                           | Not applicable | Data deficient                                                                                                                                                                                                                                                                                                                                                                                                                                   | Low       |
| <b>7. Dispersal mechanisms</b>  |      |                                                                                                                                                                    |                |                                                                                                                                                                                                                                                                                                                                                                                                                                                  |           |
| 35                              | 7.01 | How many potential internal vectors/pathways could the taxon use to disperse within the RA area (with suitable                                                     | One            | This species may be spread by humans for aquacultural purposes.                                                                                                                                                                                                                                                                                                                                                                                  | Medium    |
| 36                              | 7.02 | Will any of these vectors/pathways bring the taxon in close proximity to one or more protected areas (e.g. MCZ, MPA, SSSI)?                                        | Yes            | The probability of this is high                                                                                                                                                                                                                                                                                                                                                                                                                  | High      |
| 37                              | 7.03 | Does the taxon have a means of actively attaching itself to hard substrata (e.g. ship hulls, pilings, buoys) such that it enhances the likelihood of dispersal?    | No             | No such means has been detected                                                                                                                                                                                                                                                                                                                                                                                                                  | Medium    |
| 38                              | 7.04 | Is natural dispersal of the taxon likely to occur as eggs (for animals) or as propagules (for plants: seeds, spores) in the RA area?                               | No             | This species is not distributed in the SC region.                                                                                                                                                                                                                                                                                                                                                                                                | Very high |
| 39                              | 7.05 | Is natural dispersal of the taxon likely to occur as larvae/juveniles (for animals) or as fragments/seedlings (for plants) in the RA area?                         | No             | This species is not distributed in the SC region.                                                                                                                                                                                                                                                                                                                                                                                                | Very high |
| 40                              | 7.06 | Are older life stages of the taxon likely to migrate in the RA area for reproduction?                                                                              | No             | This species is not distributed in the SC region.                                                                                                                                                                                                                                                                                                                                                                                                | Very high |
| 41                              | 7.07 | Are propagules or eggs of the taxon likely to be dispersed in the RA area by other animals?                                                                        | No             | This species is not distributed in the SC region.                                                                                                                                                                                                                                                                                                                                                                                                | Very high |
| 42                              | 7.08 | Is dispersal of the taxon along any of the vectors/pathways mentioned in the previous seven questions (35-41; i.e. both unintentional or intentional) likely to be | Not applicable | Data deficient                                                                                                                                                                                                                                                                                                                                                                                                                                   | Low       |
| 43                              | 7.09 | Is dispersal of the taxon density dependent?                                                                                                                       | Not applicable | Data deficient                                                                                                                                                                                                                                                                                                                                                                                                                                   | Low       |
| <b>8. Tolerance attributes</b>  |      |                                                                                                                                                                    |                |                                                                                                                                                                                                                                                                                                                                                                                                                                                  |           |

|    |      |                                                                                                                                                                                           |     |                                                                                                                                                                                                                                                                                                                                                                                                                                                                                                                                                                  |           |
|----|------|-------------------------------------------------------------------------------------------------------------------------------------------------------------------------------------------|-----|------------------------------------------------------------------------------------------------------------------------------------------------------------------------------------------------------------------------------------------------------------------------------------------------------------------------------------------------------------------------------------------------------------------------------------------------------------------------------------------------------------------------------------------------------------------|-----------|
| 44 | 8.01 | Is the taxon able to withstand being out of water for extended periods (e.g. minimum of one or more hours) at some stage of its life cycle?                                               | Yes | Clarias gariepinus, possesses a pair of suprabranchial chambers located in the dorsal-posterior part of the branchial cavity having extensions from the upper parts of the second and fourth gill arches, forming the arborescent organs. This structure is an air-breathing organ (ABO) and allows aerial breathing (AB).                                                                                                                                                                                                                                       | Very high |
| 45 | 8.02 | Is the taxon tolerant of a wide range of water quality conditions relevant to that taxon? [In the Justification field, indicate the relevant water quality variable(s) being considered.] | Yes | The nature and structure of the respiratory organs of fish have a significant consequence on its ability to tolerate poor water condition. The gill of C. gariepinus is equipped with an air-breathing organ known as suprabranchial organ (Vandewalle and Chardon, 1991, Ahmed et al., 2008) while those of P. hypophthalmus do not have this organ but possesses a vascularized swim bladder (Browman and Kramer, 1985, Okomoda et al., 2017c). The efficiency of the air-breathing organ of the latter makes it more tolerant to anoxic water than the former | Very high |
| 46 | 8.03 | Can the taxon be controlled or eradicated in the wild with chemical, biological, or other agents/means?                                                                                   | Yes | Data deficient                                                                                                                                                                                                                                                                                                                                                                                                                                                                                                                                                   | Low       |
| 47 | 8.04 | Is the taxon likely to tolerate or benefit from environmental/human disturbance?                                                                                                          | Yes | This species has spread by humans in many regions of the world.                                                                                                                                                                                                                                                                                                                                                                                                                                                                                                  | Very high |
| 48 | 8.05 | Is the taxon able to tolerate salinity levels that are higher or lower than those found in its usual environment?                                                                         | Yes | Growth and survival of replicate batches of African catfish larvae were monitored in 0, 2.5, 5.0, 7.5 and 10 ppt salinity. No significant differences in mortality or growth rate were evident between 0 and 5 ppt salinity. It was concluded that 0–2.5 ppt is the optimal salinity range for larval rearing and that short-term exposure to higher salinities (2.5–7.5 ppt) could be effective in the treatment of ectoparasitic diseases (Britz and Hecht 2007).                                                                                              | High      |
| 49 | 8.06 | Are there effective natural enemies (predators) of the taxon present in the RA area?                                                                                                      | Yes | There are several potential predators distributed in the SC region who can control the C. gariepinus populations: Esox lucius, Sander lucioperca, Silurus glanis, Salmo spp. etc.                                                                                                                                                                                                                                                                                                                                                                                | Very high |

### C. Climate change

#### 9. Climate change

|    |      |                                                                                                                                                              |           |               |        |
|----|------|--------------------------------------------------------------------------------------------------------------------------------------------------------------|-----------|---------------|--------|
| 50 | 9.01 | Under the predicted future climatic conditions, are the risks of entry into the RA area posed by the taxon likely to increase, decrease or not change?       | Increase  | Own judgement | Medium |
| 51 | 9.02 | Under the predicted future climatic conditions, are the risks of establishment posed by the taxon likely to increase, decrease or not change?                | Increase  | Own judgement | Medium |
| 52 | 9.03 | Under the predicted future climatic conditions, are the risks of dispersal within the RA area posed by the taxon likely to increase, decrease or not change? | Increase  | Own judgement | Medium |
| 53 | 9.04 | Under the predicted future climatic conditions, what is the likely magnitude of future potential impacts on biodiversity and/or ecological integrity/status? | Higher    | Own judgement | Medium |
| 54 | 9.05 | Under the predicted future climatic conditions, what is the likely magnitude of future potential impacts on ecosystem structure and/or function?             | Higher    | Own judgement | Medium |
| 55 | 9.06 | Under the predicted future climatic conditions, what is the likely magnitude of future potential impacts on ecosystem services/socio-economic factors?       | No change | Own judgement | Medium |

| Statistics                                     |             |
|------------------------------------------------|-------------|
| Scores                                         |             |
| <b>BRA</b>                                     | <b>45.0</b> |
| <b>BRA Outcome</b>                             | <b>-</b>    |
| <b>BRA+CCA</b>                                 | <b>55.0</b> |
| <b>BRA+CCA Outcome</b>                         | <b>-</b>    |
| Score partition                                |             |
| <b>A. Biogeography/Historical</b>              | <b>22.0</b> |
| 1. Domestication/Cultivation                   | 4.0         |
| 2. Climate, distribution and introduction risk | 0.0         |
| 3. Invasive elsewhere                          | 18.0        |
| <b>B. Biology/Ecology</b>                      | <b>23.0</b> |
| 4. Undesirable (or persistence) traits         | 10.0        |
| 5. Resource exploitation                       | 7.0         |
| 6. Reproduction                                | 5.0         |
| 7. Dispersal mechanisms                        | -4.0        |
| 8. Tolerance attributes                        | 5.0         |
| <b>C. Climate change</b>                       | <b>10.0</b> |
| 9. Climate change                              | 10.0        |
| Answered Questions                             |             |
| <b>Total</b>                                   | <b>55</b>   |
| <b>A. Biogeography/Historical</b>              | <b>13</b>   |
| 1. Domestication/Cultivation                   | 3           |
| 2. Climate, distribution and introduction risk | 5           |
| 3. Invasive elsewhere                          | 5           |
| <b>B. Biology/Ecology</b>                      | <b>36</b>   |
| 4. Undesirable (or persistence) traits         | 12          |
| 5. Resource exploitation                       | 2           |
| 6. Reproduction                                | 7           |

|                                       |          |
|---------------------------------------|----------|
| 7. <i>Dispersal mechanisms</i>        | 9        |
| 8. <i>Tolerance attributes</i>        | 6        |
| <b>C. Climate change</b>              | <b>6</b> |
| 9. <i>Climate change</i>              | 6        |
| <b>Sectors affected</b>               |          |
| Commercial                            | 15       |
| Environmental                         | 17       |
| Species or population nuisance traits | 24       |

|                   |         |      |
|-------------------|---------|------|
| <b>Thresholds</b> |         |      |
|                   | BRA     | -    |
|                   | BRA+CCA | -    |
| <b>Confidence</b> |         |      |
|                   | BRA+CCA | 0.70 |
|                   | BRA     | 0.73 |
|                   | CCA     | 0.50 |

|                      |  |
|----------------------|--|
| <b>Date and Time</b> |  |
| 03/05/2022 14:44:09  |  |

## AS-ISK v2

| Taxon and Assessor details         |                                                                                                  |
|------------------------------------|--------------------------------------------------------------------------------------------------|
| Category                           | Fishes and Lampreys (freshwater)                                                                 |
| Taxon name                         | <i>Clarias gariepinus</i>                                                                        |
| Common name                        | North African catfish                                                                            |
| Assessor                           | Tatia Kuljanishvili                                                                              |
| Risk screening context             |                                                                                                  |
| Reason and socio-economic benefits | Has been introduced as fisheries value fish in worldwide and has become invasive in many         |
| Risk assessment area               | South Caucasus                                                                                   |
| Taxonomy                           | Actinopteri (ray-finned fishes) > Siluriformes (Catfishes) > Clariidae                           |
| Native range                       | Africa: almost Pan-Africa, absent from Maghreb, the Upper and (most of the) Lower Guinea and the |
| Introduced range                   | Widely introduced to other parts of Africa, Europe and Asia                                      |
| URL                                | <a href="https://www.fishbase.se/summary/1934">https://www.fishbase.se/summary/1934</a>          |

|                                                |      |                                                                                                                                                                         | Response | Justification (references and/or other information)                                                                                                                                                                                                                | Confidence |
|------------------------------------------------|------|-------------------------------------------------------------------------------------------------------------------------------------------------------------------------|----------|--------------------------------------------------------------------------------------------------------------------------------------------------------------------------------------------------------------------------------------------------------------------|------------|
| A. Biogeography/Historical                     |      |                                                                                                                                                                         |          |                                                                                                                                                                                                                                                                    |            |
| 1. Domestication/Cultivation                   |      |                                                                                                                                                                         |          |                                                                                                                                                                                                                                                                    |            |
| 1                                              | 1.01 | Has the taxon been the subject of domestication (or cultivation) for at least 20 generations?                                                                           | Yes      | Widely used for aquaculture                                                                                                                                                                                                                                        | Very high  |
| 2                                              | 1.02 | Is the taxon harvested in the wild and likely to be sold or used in its live form?                                                                                      | Yes      | Yes. has a commercial value and is being sold in its live form                                                                                                                                                                                                     | Very high  |
| 3                                              | 1.03 | Does the taxon have invasive races, varieties, sub-taxa or congeners?                                                                                                   | Yes      | <i>Clarias batrachus</i> for example                                                                                                                                                                                                                               | Very high  |
| 2. Climate, distribution and introduction risk |      |                                                                                                                                                                         |          |                                                                                                                                                                                                                                                                    |            |
| 4                                              | 2.01 | How similar are the climatic conditions of the Risk Assessment (RA) area and the taxon's native range?                                                                  | High     | out of 18 stations 8 are similar (at the threshold of 9 and 8) similar spots are alongside the kura river drainage and in abkhazian region                                                                                                                         | Medium     |
| 5                                              | 2.02 | What is the quality of the climate matching data?                                                                                                                       | Medium   | Quality of climate matching data is medium                                                                                                                                                                                                                         | Medium     |
| 6                                              | 2.03 | Is the taxon already present outside of captivity in the RA area?                                                                                                       | No       | No. not present.                                                                                                                                                                                                                                                   | Very high  |
| 7                                              | 2.04 | How many potential vectors could the taxon use to enter in the RA area?                                                                                                 | > 1      | Aquaculture, recreational fisheries                                                                                                                                                                                                                                | Very high  |
| 8                                              | 2.05 | Is the taxon currently found in close proximity to, and likely to enter into, the RA area in the near future (e.g. unintentional and intentional introductions)?        | Yes      | This species occurs in Turkey and is considered invasive (Tarkan et al 2014)                                                                                                                                                                                       | High       |
| 3. Invasive elsewhere                          |      |                                                                                                                                                                         |          |                                                                                                                                                                                                                                                                    |            |
| 9                                              | 3.01 | Has the taxon become naturalised (established viable populations) outside its                                                                                           | Yes      | Yes. There are several countries where it has become invasive see: <a href="https://www.cabi.org/isc/datasheet/88683">https://www.cabi.org/isc/datasheet/88683</a>                                                                                                 | Very high  |
| 10                                             | 3.02 | In the taxon's introduced range, are there known adverse impacts to wild stocks or commercial taxa?                                                                     | Yes      | The high level of niche overlap (92%) and strong competition for similar resources was exhibited by <i>C. gariepinus</i> . The adverse effects of African catfish on all fish and crustaceans in the reservoir were revealed by mixed trophic impact." (Khan et al | High       |
| 11                                             | 3.03 | In the taxon's introduced range, are there known adverse impacts to aquaculture?                                                                                        | No       | No. no data                                                                                                                                                                                                                                                        | Medium     |
| 12                                             | 3.04 | In the taxon's introduced range, are there known adverse impacts to ecosystem                                                                                           | Yes      | transmission of diseases                                                                                                                                                                                                                                           | Low        |
| 13                                             | 3.05 | In the taxon's introduced range, are there known adverse socio-economic impacts?                                                                                        | No       | No. no data                                                                                                                                                                                                                                                        | Low        |
| B. Biology/Ecology                             |      |                                                                                                                                                                         |          |                                                                                                                                                                                                                                                                    |            |
| 4. Undesirable (or persistence) traits         |      |                                                                                                                                                                         |          |                                                                                                                                                                                                                                                                    |            |
| 14                                             | 4.01 | Is it likely that the taxon will be poisonous or pose other risks to human health?                                                                                      | No       | Not poisonous <a href="https://fishbase.mnhn.fr/summary/Clarias-gariepinus.html">https://fishbase.mnhn.fr/summary/Clarias-gariepinus.html</a>                                                                                                                      | Very high  |
| 15                                             | 4.02 | Is it likely that the taxon will smother one or more native taxa (that are not threatened or protected)?                                                                | Yes      | It is possible                                                                                                                                                                                                                                                     | High       |
| 16                                             | 4.03 | Are there any threatened or protected taxa that the non-native taxon would parasitise in the RA area?                                                                   | No       | No. does not parasitise.                                                                                                                                                                                                                                           | Very high  |
| 17                                             | 4.04 | Is the taxon adaptable in terms of climatic and other environmental conditions, thus enhancing its potential persistence if it has invaded or could invade the RA area? | Yes      | it can tolerate to wide range of environmental conditions however it can not tolerate cold waters                                                                                                                                                                  | Medium     |
| 18                                             | 4.05 | Is the taxon likely to disrupt food-web structure/function in aquatic ecosystems if it has invaded or is likely to invade the RA                                        | Yes      | the ability to subsist on a wide variety of prey can devastate indigenous fish and aquatic invertebrate populations (Bruton, 1986). <a href="https://www.cabi.org/isc/datasheet/88683">https://www.cabi.org/isc/datasheet/88683</a>                                | Very high  |
| 19                                             | 4.06 | Is the taxon likely to exert adverse impacts on ecosystem services in the RA area?                                                                                      | No       | No info                                                                                                                                                                                                                                                            | Low        |
| 20                                             | 4.07 | Is it likely that the taxon will host, and/or act as a vector for, recognised pests and infectious agents that are endemic in the RA                                    | Yes      | It is likely                                                                                                                                                                                                                                                       | Very high  |
| 21                                             | 4.08 | Is it likely that the taxon will host, and/or act as a vector for, recognised pests and infectious agents that are absent from (novel to) the RA area?                  | No       | No info                                                                                                                                                                                                                                                            | Low        |
| 22                                             | 4.09 | Is it likely that the taxon will achieve a body size that will make it more likely to be released from captivity?                                                       | Yes      | It is likely. even though not documented I can assume it can be a host or vector for pests and infectious agents, that could be endemic in RA                                                                                                                      | High       |

|                                 |      |                                                                                                                                                                              |                |                                                                                                                                                                                                                                                                                                                                                                 |           |
|---------------------------------|------|------------------------------------------------------------------------------------------------------------------------------------------------------------------------------|----------------|-----------------------------------------------------------------------------------------------------------------------------------------------------------------------------------------------------------------------------------------------------------------------------------------------------------------------------------------------------------------|-----------|
| 23                              | 4.10 | Is the taxon capable of sustaining itself in a range of water velocity conditions (e.g. versatile in habitat use)?                                                           | Yes            | very versatile to habitat use: they prefer quite waters but can occur in rapid rivers as well. "Can leave the water at night using its strong pectoral fins and spines in search of land-based food or can move into the breeding areas through very shallow pathways " <a href="https://www.fishbase.se/summary/1934">https://www.fishbase.se/summary/1934</a> | High      |
| 24                              | 4.11 | Is it likely that the taxon's mode of existence (e.g. excretion of by-products) or behaviours (e.g. feeding) will reduce habitat quality for native taxa?                    | No             | NO info                                                                                                                                                                                                                                                                                                                                                         | Low       |
| 25                              | 4.12 | Is the taxon likely to maintain a viable population even when present in low densities (or persisting in adverse conditions by way of a dormant form)?                       | Yes            | Yes, if the conditions are good.                                                                                                                                                                                                                                                                                                                                | Medium    |
| <b>5. Resource exploitation</b> |      |                                                                                                                                                                              |                |                                                                                                                                                                                                                                                                                                                                                                 |           |
| 26                              | 5.01 | Is the taxon likely to consume threatened or protected native taxa in the RA area?                                                                                           | Yes            | it is likely, however, no info                                                                                                                                                                                                                                                                                                                                  | Low       |
| 27                              | 5.02 | Is the taxon likely to sequester food resources (including nutrients) to the detriment of native taxa in the RA area?                                                        | Yes            | it is likely but has not been evaluated                                                                                                                                                                                                                                                                                                                         | Low       |
| <b>6. Reproduction</b>          |      |                                                                                                                                                                              |                |                                                                                                                                                                                                                                                                                                                                                                 |           |
| 28                              | 6.01 | Is the taxon likely to exhibit parental care and/or to reduce age-at-maturity in response to environmental conditions?                                                       | Yes            | yes <a href="https://fishbase.mnhn.fr/summary/Clarias-gariepinus.html">https://fishbase.mnhn.fr/summary/Clarias-gariepinus.html</a>                                                                                                                                                                                                                             | High      |
| 29                              | 6.02 | Is the taxon likely to produce viable gametes or propagules (in the RA area)?                                                                                                | No             | To survive, the average temp. of coolest month should be > 18°C. The region experiences quite cold winters, due to this reason it is less likely that it could produce viable propagules                                                                                                                                                                        | Medium    |
| 30                              | 6.03 | Is the taxon likely to hybridise naturally with native taxa?                                                                                                                 | Yes            | It is but in the region there are no native clarias species.                                                                                                                                                                                                                                                                                                    | High      |
| 31                              | 6.04 | Is the taxon likely to be hermaphroditic or to display asexual reproduction?                                                                                                 | No             | No. Does not display asexual reproduction                                                                                                                                                                                                                                                                                                                       | Very high |
| 32                              | 6.05 | Is the taxon dependent on the presence of another taxon (or specific habitat features) to complete its life cycle?                                                           | No             | No. it is not dependent on the presence of another taxon.                                                                                                                                                                                                                                                                                                       | Very high |
| 33                              | 6.06 | Is the taxon known (or likely) to produce a large number of propagules or offspring within a short time span (e.g. < 1 year)?                                                | Yes            | they spawn several times during the year                                                                                                                                                                                                                                                                                                                        | Very high |
| 34                              | 6.07 | How many time units (days, months, years) does the taxon require to reach the age-at-first-reproduction?                                                                     | 1              | less than 1 years                                                                                                                                                                                                                                                                                                                                               | Very high |
| <b>7. Dispersal mechanisms</b>  |      |                                                                                                                                                                              |                |                                                                                                                                                                                                                                                                                                                                                                 |           |
| 35                              | 7.01 | How many potential internal vectors/pathways could the taxon use to disperse within the RA area (with suitable)                                                              | One            | Aquaculture                                                                                                                                                                                                                                                                                                                                                     | High      |
| 36                              | 7.02 | Will any of these vectors/pathways bring the taxon in close proximity to one or more protected areas (e.g. MCZ, MPA, SSSI)?                                                  | Yes            | it is likely                                                                                                                                                                                                                                                                                                                                                    | Medium    |
| 37                              | 7.03 | Does the taxon have a means of actively attaching itself to hard substrata (e.g. ship hulls, pilings, buoys) such that it enhances the likelihood of dispersal?              | No             | No. does not have morphological characters that will allow it to attach                                                                                                                                                                                                                                                                                         | Very high |
| 38                              | 7.04 | Is natural dispersal of the taxon likely to occur as eggs (for animals) or as propagules (for plants: seeds, spores) in the RA area?                                         | No             | No. Only juvenile.                                                                                                                                                                                                                                                                                                                                              | High      |
| 39                              | 7.05 | Is natural dispersal of the taxon likely to occur as larvae/juveniles (for animals) or as fragments/seedlings (for plants) in the RA area?                                   | Yes            | it is possible but less likely                                                                                                                                                                                                                                                                                                                                  | Low       |
| 40                              | 7.06 | Are older life stages of the taxon likely to migrate in the RA area for reproduction?                                                                                        | Yes            | they might                                                                                                                                                                                                                                                                                                                                                      | Medium    |
| 41                              | 7.07 | Are propagules or eggs of the taxon likely to be dispersed in the RA area by other animals?                                                                                  | No             | no. I strongly believe that this is not the way their eggs can be distributed. And it was also never documented.                                                                                                                                                                                                                                                | Very high |
| 42                              | 7.08 | Is dispersal of the taxon along any of the vectors/pathways mentioned in the previous seven questions (35-41; i.e. both unintentional or intentional) likely to be           | Not applicable | it has not been introduced yet                                                                                                                                                                                                                                                                                                                                  | Low       |
| 43                              | 7.09 | Is dispersal of the taxon density dependent?                                                                                                                                 | Yes            | it is possible                                                                                                                                                                                                                                                                                                                                                  | Low       |
| <b>8. Tolerance attributes</b>  |      |                                                                                                                                                                              |                |                                                                                                                                                                                                                                                                                                                                                                 |           |
| 44                              | 8.01 | Is the taxon able to withstand being out of water for extended periods (e.g. minimum of one or more hours) at some stage of its life cycle?                                  | Yes            | Yes. it can be out of water for long periods thanks to its ability to breath from air                                                                                                                                                                                                                                                                           | Very high |
| 45                              | 8.02 | Is the taxon tolerant of a wide range of water quality conditions relevant to that taxon? [In the Justification field, indicate the relevant water quality variable(s) being | Yes            | quite tolerant to wide water conditions and low oxygen concentrations                                                                                                                                                                                                                                                                                           | High      |
| 46                              | 8.03 | Can the taxon be controlled or eradicated in the wild with chemical, biological, or other agents/means?                                                                      | Yes            | Yes, however it is very costly and sometimes ineffective                                                                                                                                                                                                                                                                                                        | Low       |
| 47                              | 8.04 | Is the taxon likely to tolerate or benefit from environmental/human disturbance?                                                                                             | Yes            | It is possible                                                                                                                                                                                                                                                                                                                                                  | Medium    |
| 48                              | 8.05 | Is the taxon able to tolerate salinity levels that are higher or lower than those found in its usual environment?                                                            | No             | No. can not tolerate salinity fluctuations <a href="https://fishbase.mnhn.fr/summary/Clarias-gariepinus.html">https://fishbase.mnhn.fr/summary/Clarias-gariepinus.html</a>                                                                                                                                                                                      | High      |
| 49                              | 8.06 | Are there effective natural enemies (predators) of the taxon present in the RA                                                                                               | No             | No. There are not.                                                                                                                                                                                                                                                                                                                                              | Very high |



| C. Climate change |      |                                                                                                                                                              |           |                                                                                 |           |
|-------------------|------|--------------------------------------------------------------------------------------------------------------------------------------------------------------|-----------|---------------------------------------------------------------------------------|-----------|
| 9. Climate change |      |                                                                                                                                                              |           |                                                                                 |           |
| 50                | 9.01 | Under the predicted future climatic conditions, are the risks of entry into the RA area posed by the taxon likely to increase, decrease or not change?       | Increase  | Introduction risks increase                                                     | Very high |
| 51                | 9.02 | Under the predicted future climatic conditions, are the risks of establishment posed by the taxon likely to increase, decrease or not change?                | Increase  | If temperatures will rise, it increases their establishment                     | High      |
| 52                | 9.03 | Under the predicted future climatic conditions, are the risks of dispersal within the RA area posed by the taxon likely to increase, decrease or not change? | Increase  | more favorable habitats will be available for this species as well as resources | High      |
| 53                | 9.04 | Under the predicted future climatic conditions, what is the likely magnitude of future potential impacts on biodiversity and/or ecological integrity/status? | Higher    | Higher                                                                          | High      |
| 54                | 9.05 | Under the predicted future climatic conditions, what is the likely magnitude of future potential impacts on ecosystem structure and/or function?             | No change | No change                                                                       | Medium    |
| 55                | 9.06 | Under the predicted future climatic conditions, what is the likely magnitude of future potential impacts on ecosystem services/socio-economic factors?       | No change | No change                                                                       | Low       |

| Statistics                                     |      |
|------------------------------------------------|------|
| Scores                                         |      |
| BRA                                            | 38.0 |
| BRA Outcome                                    | -    |
| BRA+CCA                                        | 46.0 |
| BRA+CCA Outcome                                | -    |
| Score partition                                |      |
| A. Biogeography/Historical                     | 15.0 |
| 1. Domestication/Cultivation                   | 4.0  |
| 2. Climate, distribution and introduction risk | 1.0  |
| 3. Invasive elsewhere                          | 10.0 |
| B. Biology/Ecology                             | 23.0 |
| 4. Undesirable (or persistence) traits         | 7.0  |
| 5. Resource exploitation                       | 7.0  |
| 6. Reproduction                                | 4.0  |
| 7. Dispersal mechanisms                        | 1.0  |
| 8. Tolerance attributes                        | 4.0  |
| C. Climate change                              | 8.0  |
| 9. Climate change                              | 8.0  |
| Answered Questions                             |      |
| Total                                          | 55   |
| A. Biogeography/Historical                     | 13   |
| 1. Domestication/Cultivation                   | 3    |
| 2. Climate, distribution and introduction risk | 5    |
| 3. Invasive elsewhere                          | 5    |
| B. Biology/Ecology                             | 36   |
| 4. Undesirable (or persistence) traits         | 12   |
| 5. Resource exploitation                       | 2    |
| 6. Reproduction                                | 7    |
| 7. Dispersal mechanisms                        | 9    |
| 8. Tolerance attributes                        | 6    |
| C. Climate change                              | 6    |
| 9. Climate change                              | 6    |
| Sectors affected                               |      |
| Commercial                                     | 8    |
| Environmental                                  | 13   |
| Species or population nuisance traits          | 27   |

| Thresholds |      |
|------------|------|
| BRA        | -    |
| BRA+CCA    | -    |
| Confidence |      |
| BRA+CCA    | 0.68 |
| BRA        | 0.68 |
| CCA        | 0.67 |

| Date and Time       |
|---------------------|
| 20/05/2022 16:27:15 |

## AS-ISK v2

| Taxon and Assessor details         |                                                                                                                           |
|------------------------------------|---------------------------------------------------------------------------------------------------------------------------|
| Category                           | Fishes and Lampreys (freshwater)                                                                                          |
| Taxon name                         | <i>Coregonus albula</i>                                                                                                   |
| Common name                        | vendace                                                                                                                   |
| Assessor                           | Bella Japoshvili                                                                                                          |
| Risk screening context             |                                                                                                                           |
| Reason and socio-economic benefits | The species was subject of repeated introduction and had an important economic values                                     |
| Risk assessment area               | South Caucasus                                                                                                            |
| Taxonomy                           | Actinopteri (ray-finned fishes) > Salmoniformes (Salmons) > Salmonidae (Salmonids)                                        |
| Native range                       | North-west Eurasia                                                                                                        |
| Introduced range                   | NUmber of European Countries                                                                                              |
| URL                                | <a href="https://www.fishbase.de/summary/Coregonus-albula.html">https://www.fishbase.de/summary/Coregonus-albula.html</a> |

|                                                |      |                                                                                                                                                                         | Response | Justification (references and/or other information)                                                                                                                                                                                                                                                                                                                                                                                                                                                                                                                                            | Confidence |
|------------------------------------------------|------|-------------------------------------------------------------------------------------------------------------------------------------------------------------------------|----------|------------------------------------------------------------------------------------------------------------------------------------------------------------------------------------------------------------------------------------------------------------------------------------------------------------------------------------------------------------------------------------------------------------------------------------------------------------------------------------------------------------------------------------------------------------------------------------------------|------------|
| A. Biogeography/Historical                     |      |                                                                                                                                                                         |          |                                                                                                                                                                                                                                                                                                                                                                                                                                                                                                                                                                                                |            |
| 1. Domestication/Cultivation                   |      |                                                                                                                                                                         |          |                                                                                                                                                                                                                                                                                                                                                                                                                                                                                                                                                                                                |            |
| 1                                              | 1.01 | Has the taxon been the subject of domestication (or cultivation) for at least 20 generations?                                                                           | Yes      | Japoshvili, B. (2012). Long-term assessment of a vendace ( <i>Coregonus albula</i> L.) stock in Lake Paravani, South Georgia. <i>Advances in Limnology</i> , 63, 363-369.                                                                                                                                                                                                                                                                                                                                                                                                                      | Very high  |
| 2                                              | 1.02 | Is the taxon harvested in the wild and likely to be sold or used in its live form?                                                                                      | Yes      | Frys are imported for introduction purpose                                                                                                                                                                                                                                                                                                                                                                                                                                                                                                                                                     | High       |
| 3                                              | 1.03 | Does the taxon have invasive races, varieties, sub-taxa or congeners?                                                                                                   | Yes      | There are other congeners also introduced in many areas                                                                                                                                                                                                                                                                                                                                                                                                                                                                                                                                        | High       |
| 2. Climate, distribution and introduction risk |      |                                                                                                                                                                         |          |                                                                                                                                                                                                                                                                                                                                                                                                                                                                                                                                                                                                |            |
| 4                                              | 2.01 | How similar are the climatic conditions of the Risk Assessment (RA) area and the taxon's native range?                                                                  | Low      | Climatch algorithm shows a low similarity to its native range                                                                                                                                                                                                                                                                                                                                                                                                                                                                                                                                  | Medium     |
| 5                                              | 2.02 | What is the quality of the climate matching data?                                                                                                                       | Low      | Due to absence of extensive climate data for the RA                                                                                                                                                                                                                                                                                                                                                                                                                                                                                                                                            | High       |
| 6                                              | 2.03 | Is the taxon already present outside of captivity in the RA area?                                                                                                       | Yes      | Kuljanishvili, T., Mumladze, L., Japoshvili, B., Mustafayev, N., Ibrahimov, S., Patoka, J., ... & Kalous, L. (2021). The first unified inventory of non-native fishes of the South Caucasian countries, Armenia, Azerbaijan, and Georgia. <i>Knowledge &amp; Management of Aquatic Ecosystems</i> , (422), 32.                                                                                                                                                                                                                                                                                 | High       |
| 7                                              | 2.04 | How many potential vectors could the taxon use to enter in the RA area?                                                                                                 | One      | Only human mediated dispersal is possible for the RA area                                                                                                                                                                                                                                                                                                                                                                                                                                                                                                                                      | High       |
| 8                                              | 2.05 | Is the taxon currently found in close proximity to, and likely to enter into, the RA area in the near future (e.g. unintentional and intentional introductions)?        | Yes      | It is already in RA area                                                                                                                                                                                                                                                                                                                                                                                                                                                                                                                                                                       | Very high  |
| 3. Invasive elsewhere                          |      |                                                                                                                                                                         |          |                                                                                                                                                                                                                                                                                                                                                                                                                                                                                                                                                                                                |            |
| 9                                              | 3.01 | Has the taxon become naturalised (established viable populations) outside its introduced range?                                                                         | Yes      | <a href="https://www.cabi.org/isc/datasheet/88207#toriskOfIntroduction">https://www.cabi.org/isc/datasheet/88207#toriskOfIntroduction</a>                                                                                                                                                                                                                                                                                                                                                                                                                                                      | High       |
| 10                                             | 3.02 | In the taxon's introduced range, are there known adverse impacts to wild stocks or commercial taxa?                                                                     | No       | No such an evidence                                                                                                                                                                                                                                                                                                                                                                                                                                                                                                                                                                            | Medium     |
| 11                                             | 3.03 | In the taxon's introduced range, are there known adverse impacts to aquaculture?                                                                                        | No       | No such an evidence                                                                                                                                                                                                                                                                                                                                                                                                                                                                                                                                                                            | Medium     |
| 12                                             | 3.04 | In the taxon's introduced range, are there known adverse impacts to ecosystem?                                                                                          | No       | No such an evidence                                                                                                                                                                                                                                                                                                                                                                                                                                                                                                                                                                            | Low        |
| 13                                             | 3.05 | In the taxon's introduced range, are there known adverse socio-economic impacts?                                                                                        | No       | No such an evidence                                                                                                                                                                                                                                                                                                                                                                                                                                                                                                                                                                            | Medium     |
| B. Biology/Ecology                             |      |                                                                                                                                                                         |          |                                                                                                                                                                                                                                                                                                                                                                                                                                                                                                                                                                                                |            |
| 4. Undesirable (or persistence) traits         |      |                                                                                                                                                                         |          |                                                                                                                                                                                                                                                                                                                                                                                                                                                                                                                                                                                                |            |
| 14                                             | 4.01 | Is it likely that the taxon will be poisonous or pose other risks to human health?                                                                                      | No       | The species is not harmful                                                                                                                                                                                                                                                                                                                                                                                                                                                                                                                                                                     | High       |
| 15                                             | 4.02 | Is it likely that the taxon will smother one or more native taxa (that are not threatened or protected)?                                                                | Yes      | The species is zooplanktivorous and can have strong effect on plankton taxa Bøhn T; Amundsen PA, 1998. Effects of invading vendace ( <i>Coregonus albula</i> L.) on species composition and body size in two zooplankton communities of the Pasvik River System, northern Norway. <i>Journal of Plankton Research</i> , 20(2):243-256.                                                                                                                                                                                                                                                         | High       |
| 16                                             | 4.03 | Are there any threatened or protected taxa that the non-native taxon would parasitise in the RA area?                                                                   | No       | Vendace is not a parasite                                                                                                                                                                                                                                                                                                                                                                                                                                                                                                                                                                      | High       |
| 17                                             | 4.04 | Is the taxon adaptable in terms of climatic and other environmental conditions, thus enhancing its potential persistence if it has invaded or could invade the RA area? | No       | No such an evidence. Usually requires very similar conditions to its native habitats                                                                                                                                                                                                                                                                                                                                                                                                                                                                                                           | Medium     |
| 18                                             | 4.05 | Is the taxon likely to disrupt food-web structure/function in aquatic ecosystems if it has invaded or is likely to invade the RA area?                                  | Yes      | By affecting the local community Bøhn T; Amundsen PA, 1998. Effects of invading vendace ( <i>Coregonus albula</i> L.) on species composition and body size in two zooplankton communities of the Pasvik River System, northern Norway. <i>Journal of Plankton Research</i> , 20(2):243-256. Amundsen PA; Siwertsson A; Primicerio R; Bøhn T, 2009. Long-term responses of zooplankton to invasion by a planktivorous fish in a subarctic watercourse. <i>Freshwater Biology</i> , 54(1):24-34. <a href="http://www.blackwell-synergy.com/loi/fwb">http://www.blackwell-synergy.com/loi/fwb</a> | High       |
| 19                                             | 4.06 | Is the taxon likely to exert adverse impacts on ecosystem services in the RA area?                                                                                      | No       | No such an evidence                                                                                                                                                                                                                                                                                                                                                                                                                                                                                                                                                                            | Medium     |
| 20                                             | 4.07 | Is it likely that the taxon will host, and/or act as a vector for, recognised pests and infectious agents that are endemic in the RA area?                              | No       | No such endemic pest or infectious agents are known for the RA area                                                                                                                                                                                                                                                                                                                                                                                                                                                                                                                            | Medium     |

|                                 |      |                                                                                                                                                                              |     |                                                                                                                                                                                                                      |           |
|---------------------------------|------|------------------------------------------------------------------------------------------------------------------------------------------------------------------------------|-----|----------------------------------------------------------------------------------------------------------------------------------------------------------------------------------------------------------------------|-----------|
| 21                              | 4.08 | Is it likely that the taxon will host, and/or act as a vector for, recognised pests and infectious agents that are absent from (novel to) the RA area?                       | Yes | Although not yet such fact have been detected, species can bring pest or infectious agent absent in in RA area but common in vendace's native area                                                                   | Medium    |
| 22                              | 4.09 | Is it likely that the taxon will achieve a body size that will make it more likely to be released from captivity?                                                            | No  | It is only kept in natural water bodies                                                                                                                                                                              | High      |
| 23                              | 4.10 | Is the taxon capable of sustaining itself in a range of water velocity conditions (e.g. versatile in habitat use)?                                                           | Yes | The species is anadromous though no exact data is available on its ability to adapt different velocity levels                                                                                                        | Medium    |
| 24                              | 4.11 | Is it likely that the taxon's mode of existence (e.g. excretion of by-products) or behaviours (e.g. feeding) will reduce habitat quality for native taxa?                    | Yes | Through the reduction of available food                                                                                                                                                                              | Medium    |
| 25                              | 4.12 | Is the taxon likely to maintain a viable population even when present in low densities (or persisting in adverse conditions by way of a dormant form)?                       | No  | No such an evidence                                                                                                                                                                                                  | High      |
| <b>5. Resource exploitation</b> |      |                                                                                                                                                                              |     |                                                                                                                                                                                                                      |           |
| 26                              | 5.01 | Is the taxon likely to consume threatened or protected native taxa in the RA area?                                                                                           | No  | The fish is plancton feeder and no threatend plancton species are known from RA area                                                                                                                                 | High      |
| 27                              | 5.02 | Is the taxon likely to sequester food resources (including nutrients) to the detriment of native taxa in the RA area?                                                        | Yes | Not the RIP values have been calculated, however, vendace is in dorect competition for food with native salmon and other cyprinids                                                                                   | High      |
| <b>6. Reproduction</b>          |      |                                                                                                                                                                              |     |                                                                                                                                                                                                                      |           |
| 28                              | 6.01 | Is the taxon likely to exhibit parental care and/or to reduce age-at-maturity in response to environmental conditions?                                                       | No  | No such an evidence exists                                                                                                                                                                                           | High      |
| 29                              | 6.02 | Is the taxon likely to produce viable gametes or propagules (in the RA area)?                                                                                                | Yes | Kuljanishvili, T., Mumladze, L., Kalous, L., & Japoshvili, B. (2018). Fish species composition, sex ratio and growth parameters in Saghamo Lake (Southern Georgia). <i>Biologia</i> , 73(1), 93-100.                 | Medium    |
| 30                              | 6.03 | Is the taxon likely to hybridise naturally with native taxa?                                                                                                                 | No  | No such an evidence                                                                                                                                                                                                  | High      |
| 31                              | 6.04 | Is the taxon likely to be hermaphroditic or to display asexual reproduction?                                                                                                 | No  | No such an evidence exists                                                                                                                                                                                           | High      |
| 32                              | 6.05 | Is the taxon dependent on the presence of another taxon (or specific habitat features) to complete its life cycle?                                                           | No  | Vendace does not require any other species for completion of life cycle                                                                                                                                              | High      |
| 33                              | 6.06 | Is the taxon known (or likely) to produce a large number of propagules or offspring within a short time span (e.g. < 1 year)?                                                | Yes | Species is usually producing large amount of eggs after reaching the adult size (CABI, 2022. <i>Coregonus albula</i> . In: Invasive Species Compendium. Wallingford, UK: CAB International.                          | High      |
| 34                              | 6.07 | How many time units (days, months, years) does the taxon require to reach the age-at-first-reproduction?                                                                     | 2   | years                                                                                                                                                                                                                | High      |
| <b>7. Dispersal mechanisms</b>  |      |                                                                                                                                                                              |     |                                                                                                                                                                                                                      |           |
| 35                              | 7.01 | How many potential internal vectors/pathways could the taxon use to disperse within the RA area (with suitable vectors/pathways)?                                            | One | Only human dependant translocation                                                                                                                                                                                   | High      |
| 36                              | 7.02 | Will any of these vectors/pathways bring the taxon in close proximity to one or more protected areas (e.g. MCZ, MPA, SSSI)?                                                  | Yes | Yes, the species is released within the Javakheti protected areas                                                                                                                                                    | High      |
| 37                              | 7.03 | Does the taxon have a means of actively attaching itself to hard substrata (e.g. ship hulls, pilings, buoys) such that it enhances the likelihood of dispersal?              | No  | No such an evidence                                                                                                                                                                                                  | Very high |
| 38                              | 7.04 | Is natural dispersal of the taxon likely to occur as eggs (for animals) or as propagules (for plants: seeds, spores) in the RA area?                                         | No  | No such an evidence                                                                                                                                                                                                  | High      |
| 39                              | 7.05 | Is natural dispersal of the taxon likely to occur as larvae/juveniles (for animals) or as fragments/seedlings (for plants) in the RA area?                                   | No  | No such evidence exists for vendace                                                                                                                                                                                  | High      |
| 40                              | 7.06 | Are older life stages of the taxon likely to migrate in the RA area for reproduction?                                                                                        | No  | No such evidence exists                                                                                                                                                                                              | Very high |
| 41                              | 7.07 | Are propagules or eggs of the taxon likely to be dispersed in the RA area by other animals?                                                                                  | No  | No such an evidence is known                                                                                                                                                                                         | Very high |
| 42                              | 7.08 | Is dispersal of the taxon along any of the vectors/pathways mentioned in the previous seven questions (35–41; i.e. both unintentional or intentional) likely to be           | Yes | Usually a large number of fry are released Japoshvili, B. (2012). Long-term assessment of a vendace ( <i>Coregonus albula</i> L.) stock in Lake Paravani, South Georgia. <i>Advances in Limnology</i> , 63, 363-369. | Very high |
| 43                              | 7.09 | Is dispersal of the taxon density dependent?                                                                                                                                 | No  | No such an evidence exists                                                                                                                                                                                           | Medium    |
| <b>8. Tolerance attributes</b>  |      |                                                                                                                                                                              |     |                                                                                                                                                                                                                      |           |
| 44                              | 8.01 | Is the taxon able to withstand being out of water for extended periods (e.g. minimum of one or more hours) at some stage of its life cycle?                                  | No  | No such ana evidence exists                                                                                                                                                                                          | High      |
| 45                              | 8.02 | Is the taxon tolerant of a wide range of water quality conditions relevant to that taxon? [In the Justification field, indicate the relevant water quality variable(s) being | No  | No such an evidence exists                                                                                                                                                                                           | High      |
| 46                              | 8.03 | Can the taxon be controlled or eradicated in the wild with chemical, biological, or other agents/means?                                                                      | No  | No such an evidence exists                                                                                                                                                                                           | High      |
| 47                              | 8.04 | Is the taxon likely to tolerate or benefit from environmental/human disturbance?                                                                                             | No  | Not expected based on professional experience                                                                                                                                                                        | High      |

|                          |      |                                                                                                                                                              |           |                                                                          |        |
|--------------------------|------|--------------------------------------------------------------------------------------------------------------------------------------------------------------|-----------|--------------------------------------------------------------------------|--------|
| 48                       | 8.05 | Is the taxon able to tolerate salinity levels that are higher or lower than those found in its usual environment?                                            | No        | No such an evidence                                                      | Medium |
| 49                       | 8.06 | Are there effective natural enemies (predators) of the taxon present in the RA                                                                               | No        | No effective natural enemies have been observed in RA area               | Medium |
| <b>C. Climate change</b> |      |                                                                                                                                                              |           |                                                                          |        |
| <b>9. Climate change</b> |      |                                                                                                                                                              |           |                                                                          |        |
| 50                       | 9.01 | Under the predicted future climatic conditions, are the risks of entry into the RA area posed by the taxon likely to increase, decrease or not change?       | No change | Based on professional judgment                                           | High   |
| 51                       | 9.02 | Under the predicted future climatic conditions, are the risks of establishment posed by the taxon likely to increase, decrease or not change?                | Decrease  | Increase of temperature most probably decrease the risk of establishment | Low    |
| 52                       | 9.03 | Under the predicted future climatic conditions, are the risks of dispersal within the RA area posed by the taxon likely to increase, decrease or not change? | Decrease  | Increase of temperature most probably decrease the risk of dispersal     | Low    |
| 53                       | 9.04 | Under the predicted future climatic conditions, what is the likely magnitude of future potential impacts on biodiversity and/or ecological integrity/status? | Lower     | Based on personal guess                                                  | Low    |
| 54                       | 9.05 | Under the predicted future climatic conditions, what is the likely magnitude of future potential impacts on ecosystem structure and/or function?             | Lower     | Based on personal guess                                                  | Low    |
| 55                       | 9.06 | Under the predicted future climatic conditions, what is the likely magnitude of future potential impacts on ecosystem services/socio-economic factors?       | Lower     | Based on personal guess                                                  | Low    |

| Statistics                                     |              |
|------------------------------------------------|--------------|
| Scores                                         |              |
| <b>BRA</b>                                     | <b>9.0</b>   |
| <b>BRA Outcome</b>                             | <b>-</b>     |
| <b>BRA+CCA</b>                                 | <b>-1.0</b>  |
| <b>BRA+CCA Outcome</b>                         | <b>-</b>     |
| Score partition                                |              |
| <b>A. Biogeography/Historical</b>              | <b>7.0</b>   |
| 1. Domestication/Cultivation                   | 4.0          |
| 2. Climate, distribution and introduction risk | 1.0          |
| 3. Invasive elsewhere                          | 2.0          |
| <b>B. Biology/Ecology</b>                      | <b>2.0</b>   |
| 4. Undesirable (or persistence) traits         | 4.0          |
| 5. Resource exploitation                       | 2.0          |
| 6. Reproduction                                | 1.0          |
| 7. Dispersal mechanisms                        | -3.0         |
| 8. Tolerance attributes                        | -2.0         |
| <b>C. Climate change</b>                       | <b>-10.0</b> |
| 9. Climate change                              | -10.0        |
| Answered Questions                             |              |
| <b>Total</b>                                   | <b>55</b>    |
| <b>A. Biogeography/Historical</b>              | <b>13</b>    |
| 1. Domestication/Cultivation                   | 3            |
| 2. Climate, distribution and introduction risk | 5            |
| 3. Invasive elsewhere                          | 5            |
| <b>B. Biology/Ecology</b>                      | <b>36</b>    |
| 4. Undesirable (or persistence) traits         | 12           |
| 5. Resource exploitation                       | 2            |
| 6. Reproduction                                | 7            |
| 7. Dispersal mechanisms                        | 9            |
| 8. Tolerance attributes                        | 6            |
| <b>C. Climate change</b>                       | <b>6</b>     |
| 9. Climate change                              | 6            |
| Sectors affected                               |              |
| <b>Commercial</b>                              | <b>3</b>     |
| <b>Environmental</b>                           | <b>-1</b>    |
| <b>Species or population nuisance traits</b>   | <b>0</b>     |

| Thresholds     |             |
|----------------|-------------|
| <b>BRA</b>     | <b>-</b>    |
| <b>BRA+CCA</b> | <b>-</b>    |
| Confidence     |             |
| <b>BRA+CCA</b> | <b>0.66</b> |
| <b>BRA</b>     | <b>0.70</b> |
| <b>CCA</b>     | <b>0.33</b> |

| Date and Time       |
|---------------------|
| 14/05/2022 12:41:46 |

## AS-ISK v2

| Taxon and Assessor details         |                                                                                                                           |
|------------------------------------|---------------------------------------------------------------------------------------------------------------------------|
| Category                           | Fishes and Lampreys (freshwater)                                                                                          |
| Taxon name                         | <i>Coregonus albula</i>                                                                                                   |
| Common name                        | vendace                                                                                                                   |
| Assessor                           | Giorgi Epitashvili                                                                                                        |
| Risk screening context             |                                                                                                                           |
| Reason and socio-economic benefits | The species has a trade importance. It is included in Appendix III of the Bern Convention                                 |
| Risk assessment area               | South Caucasus                                                                                                            |
| Taxonomy                           | <i>Coregonus albula</i> (Linnaeus 1758)                                                                                   |
| Native range                       | Europe: Baltic basin, lakes of upper Volga drainage (Seliger, Vseluga, Perejaslavskoe), some lakes                        |
| Introduced range                   | This fish frequently stocked in lakes and reservoirs in Germany and Poland. It has been introduced                        |
| URL                                | <a href="https://www.fishbase.in/summary/Coregonus-albula.html">https://www.fishbase.in/summary/Coregonus-albula.html</a> |

|                                                |      |                                                                                                                                                                         | Response | Justification (references and/or other information)                                                                                                                                                                                                                                                                                                                                                                                                                                                                                  | Confidence |
|------------------------------------------------|------|-------------------------------------------------------------------------------------------------------------------------------------------------------------------------|----------|--------------------------------------------------------------------------------------------------------------------------------------------------------------------------------------------------------------------------------------------------------------------------------------------------------------------------------------------------------------------------------------------------------------------------------------------------------------------------------------------------------------------------------------|------------|
| A. Biogeography/Historical                     |      |                                                                                                                                                                         |          |                                                                                                                                                                                                                                                                                                                                                                                                                                                                                                                                      |            |
| 1. Domestication/Cultivation                   |      |                                                                                                                                                                         |          |                                                                                                                                                                                                                                                                                                                                                                                                                                                                                                                                      |            |
| 1                                              | 1.01 | Has the taxon been the subject of domestication (or cultivation) for at least 20 generations?                                                                           | Yes      | This fish has a trade importance and frequently stocked in lakes and reservoirs in Germany and in Poland (Ninua et al. 2013).                                                                                                                                                                                                                                                                                                                                                                                                        | Very high  |
| 2                                              | 1.02 | Is the taxon harvested in the wild and likely to be sold or used in its live form?                                                                                      | Yes      | The local populations of <i>Coregonus lavaretus</i> are commercially valuable in Georgia though the abundance is decreasing due to the unavailability of local hatcheries (Kuljanishvili et al. 2020).                                                                                                                                                                                                                                                                                                                               | Very high  |
| 3                                              | 1.03 | Does the taxon have invasive races, varieties, sub-taxa or congeners?                                                                                                   | Yes      | In the Pasvik River System, northern Norway invasion and establishment of a dense vendace population in the upper locality had increased the predation pressure in the pelagic, resulting in a reduction of body size and a shift towards smaller species in the zooplankton community (Bohn & Amundsen 1998).                                                                                                                                                                                                                       | High       |
| 2. Climate, distribution and introduction risk |      |                                                                                                                                                                         |          |                                                                                                                                                                                                                                                                                                                                                                                                                                                                                                                                      |            |
| 4                                              | 2.01 | How similar are the climatic conditions of the Risk Assessment (RA) area and the taxon's native range?                                                                  | Medium   | Answer is based on Köppen–Geiger climate map.                                                                                                                                                                                                                                                                                                                                                                                                                                                                                        | Medium     |
| 5                                              | 2.02 | What is the quality of the climate matching data?                                                                                                                       | Medium   | Answer is based on Köppen–Geiger climate map.                                                                                                                                                                                                                                                                                                                                                                                                                                                                                        | Medium     |
| 6                                              | 2.03 | Is the taxon already present outside of captivity in the RA area?                                                                                                       | Yes      | This species has been introduced in Georgia since 1930, in the Lakes Tabatskuri and Paravani. Two species were introduced to Lake Sevan in the 1920s: <i>Coregonus ludoga</i> from Lake Ladoga and <i>Coregonus maraenoides</i> from Lake Chudskoe (both in Northern European Russia). These two species naturalised and hybridised in the lake and an intermediate phenotype was subsequently described as a <i>Coregonus lavaretus sevanicus</i> by Dadikvan (1986) (Mailvan, 1957; Ninua et al. 2013; Kuljanishvili et al. 2020). | Very high  |
| 7                                              | 2.04 | How many potential vectors could the taxon use to enter in the RA area?                                                                                                 | One      | This species intentionally spread within the south Caucasus region for aquacultural purposes (Kuljanishvili et al. 2020)                                                                                                                                                                                                                                                                                                                                                                                                             | High       |
| 8                                              | 2.05 | Is the taxon currently found in close proximity to, and likely to enter into, the RA area in the near future (e.g. unintentional and intentional introductions)?        | Yes      | <i>Coregonus albula</i> was first seen in the shared Aktas/Kartsakhi lake between Turkey and Georgia as an alien species (Yerli 2019)                                                                                                                                                                                                                                                                                                                                                                                                | Very high  |
| 3. Invasive elsewhere                          |      |                                                                                                                                                                         |          |                                                                                                                                                                                                                                                                                                                                                                                                                                                                                                                                      |            |
| 9                                              | 3.01 | Has the taxon become naturalised (established viable populations) outside its native range?                                                                             | Yes      | This species has been established in many parts of the world, also in the SC region (Japoshvili et al. 2012; Ninua et al. 2013; Kuljanishvili et al. 2020).                                                                                                                                                                                                                                                                                                                                                                          | Very high  |
| 10                                             | 3.02 | In the taxon's introduced range, are there known adverse impacts to wild stocks or commercial taxa?                                                                     | Yes      | In the Pasvik River System, northern Norway invasion and establishment of a dense vendace population in the upper locality had increased the predation pressure in the pelagic, resulting in a reduction of body size and a shift towards smaller species in the zooplankton community (Bohn & Amundsen 1998).                                                                                                                                                                                                                       | High       |
| 11                                             | 3.03 | In the taxon's introduced range, are there known adverse impacts to aquaculture?                                                                                        | No       | Such data is not available                                                                                                                                                                                                                                                                                                                                                                                                                                                                                                           | Medium     |
| 12                                             | 3.04 | In the taxon's introduced range, are there known adverse impacts to ecosystem                                                                                           | No       | Such data is not available                                                                                                                                                                                                                                                                                                                                                                                                                                                                                                           | Medium     |
| 13                                             | 3.05 | In the taxon's introduced range, are there known adverse socio-economic impacts?                                                                                        | No       | Such data is not available                                                                                                                                                                                                                                                                                                                                                                                                                                                                                                           | Medium     |
| B. Biology/Ecology                             |      |                                                                                                                                                                         |          |                                                                                                                                                                                                                                                                                                                                                                                                                                                                                                                                      |            |
| 4. Undesirable (or persistence) traits         |      |                                                                                                                                                                         |          |                                                                                                                                                                                                                                                                                                                                                                                                                                                                                                                                      |            |
| 14                                             | 4.01 | Is it likely that the taxon will be poisonous or pose other risks to human health?                                                                                      | No       | This species does not pose a threat to humans                                                                                                                                                                                                                                                                                                                                                                                                                                                                                        | Very high  |
| 15                                             | 4.02 | Is it likely that the taxon will smother one or more native taxa (that are not threatened or protected)?                                                                | Yes      | In the Pasvik River System, northern Norway invasion and establishment of a dense vendace population in the upper locality had increased the predation pressure in the pelagic, resulting in a reduction of body size and a shift towards smaller species in the zooplankton community (Bohn & Amundsen 1998).                                                                                                                                                                                                                       | High       |
| 16                                             | 4.03 | Are there any threatened or protected taxa that the non-native taxon would parasitise in the RA area?                                                                   | Yes      | <i>C. albula</i> is a predator fish and can eat protected or threatend native species in the Caucasus region such as <i>Salmo caspius</i> , <i>Salmo ischchan</i> , <i>Cyprinus carpio</i> etc.                                                                                                                                                                                                                                                                                                                                      | High       |
| 17                                             | 4.04 | Is the taxon adaptable in terms of climatic and other environmental conditions, thus enhancing its potential persistence if it has invaded or could invade the RA area? | Yes      | This species is occurring in the South Caucasus region since 1920s and it seems that climatic and environmental conditions of the region is suitable for it.                                                                                                                                                                                                                                                                                                                                                                         | High       |
| 18                                             | 4.05 | Is the taxon likely to disrupt food-web structure/function in aquatic ecosystems if it has invaded or is likely to invade the RA                                        | Yes      | On the example of Norway (Bohn & Amundsen 1998) we can assume that if its population increases this will lead to significant changes in the food web structure.                                                                                                                                                                                                                                                                                                                                                                      | High       |
| 19                                             | 4.06 | Is the taxon likely to exert adverse impacts on ecosystem services in the RA area?                                                                                      | No       | Own judgement                                                                                                                                                                                                                                                                                                                                                                                                                                                                                                                        | Medium     |

|                                 |      |                                                                                                                                                                    |                |                                                                                                                                                                                                                                                                                |           |
|---------------------------------|------|--------------------------------------------------------------------------------------------------------------------------------------------------------------------|----------------|--------------------------------------------------------------------------------------------------------------------------------------------------------------------------------------------------------------------------------------------------------------------------------|-----------|
| 20                              | 4.07 | Is it likely that the taxon will host, and/or act as a vector for, recognised pests and infectious agents that are endemic in the RA                               | No             | Such data is not available                                                                                                                                                                                                                                                     | Medium    |
| 21                              | 4.08 | Is it likely that the taxon will host, and/or act as a vector for, recognised pests and infectious agents that are absent from (novel to) the RA area?             | No             | Such data is not available                                                                                                                                                                                                                                                     | Medium    |
| 22                              | 4.09 | Is it likely that the taxon will achieve a body size that will make it more likely to be released from captivity?                                                  | Yes            | Max length of <i>C. albula</i> is 48.0 cm, max. published weight: 1.0 kg (Muus and Dahlström 1968), therefore this species can be released in nature from captivity.                                                                                                           | High      |
| 23                              | 4.10 | Is the taxon capable of sustaining itself in a range of water velocity conditions (e.g. versatile in habitat use)?                                                 | No             | <i>C. albula</i> is a lacustrine and marine species. At sea, forages close to coast (Kottelat and Freyhof 2007).                                                                                                                                                               | Medium    |
| 24                              | 4.11 | Is it likely that the taxon's mode of existence (e.g. excretion of by-products) or behaviours (e.g. feeding) will reduce habitat quality for native taxa?          | No             | Such data is not available                                                                                                                                                                                                                                                     | Medium    |
| 25                              | 4.12 | Is the taxon likely to maintain a viable population even when present in low densities (or persisting in adverse conditions by way of a dormant form)?             | Yes            | A recovery of <i>C. albula</i> from overfishing is possible because the biological features of this fish make it a highly resilient species (Sarvala et al. 2020).                                                                                                             | High      |
| <b>5. Resource exploitation</b> |      |                                                                                                                                                                    |                |                                                                                                                                                                                                                                                                                |           |
| 26                              | 5.01 | Is the taxon likely to consume threatened or protected native taxa in the RA area?                                                                                 | Yes            | <i>C. albula</i> is a predator fish and can eat protected or threatened native species in the Caucasus region such as <i>Salmo caspius</i> , <i>Salmo ischchan</i> , <i>Cyprinus carpio</i> etc.                                                                               | High      |
| 27                              | 5.02 | Is the taxon likely to sequester food resources (including nutrients) to the detriment of native taxa in the RA area?                                              | No             | No such fact has been observed                                                                                                                                                                                                                                                 | Low       |
| <b>6. Reproduction</b>          |      |                                                                                                                                                                    |                |                                                                                                                                                                                                                                                                                |           |
| 28                              | 6.01 | Is the taxon likely to exhibit parental care and/or to reduce age-at-maturity in response to environmental conditions?                                             | Not applicable | Such data is not available                                                                                                                                                                                                                                                     | Low       |
| 29                              | 6.02 | Is the taxon likely to produce viable gametes or propagules (in the RA area)?                                                                                      | Yes            | This species reproduces naturally in the South Caucasus region (Kuljanishvili et al. 2020).                                                                                                                                                                                    | High      |
| 30                              | 6.03 | Is the taxon likely to hybridise naturally with native taxa?                                                                                                       | Yes            | Hybridization between native <i>Coregonus lavaretus</i> and introduced <i>C. albula</i> were detected in Finland (Kahilainen et al. 2011).                                                                                                                                     | High      |
| 31                              | 6.04 | Is the taxon likely to be hermaphroditic or to display asexual reproduction?                                                                                       | Yes            | The investigation of gonad development in the early life history stages of the whitefish <i>Coregonus lavaretus baeri</i> (Kessler) under experimental conditions revealed the phenomenon of mass hermaphroditism as response to high temperature influence (Bogdanova, 2004). | High      |
| 32                              | 6.05 | Is the taxon dependent on the presence of another taxon (or specific habitat features) to complete its life cycle?                                                 | No             | No such fact has been described                                                                                                                                                                                                                                                | High      |
| 33                              | 6.06 | Is the taxon known (or likely) to produce a large number of propagules or offspring within a short time span (e.g. < 1 year)?                                      | No             | No such fact has been described                                                                                                                                                                                                                                                | Medium    |
| 34                              | 6.07 | How many time units (days, months, years) does the taxon require to reach the age-at-first-reproduction?                                                           | 3              | The species become sexually mature at the age of 3-4 (Ninua et al. 2013).                                                                                                                                                                                                      | High      |
| <b>7. Dispersal mechanisms</b>  |      |                                                                                                                                                                    |                |                                                                                                                                                                                                                                                                                |           |
| 35                              | 7.01 | How many potential internal vectors/pathways could the taxon use to disperse within the RA area (with suitable vectors)?                                           | One            | This species can disperse within the SC region intentionally by humans for aquacultural purposes.                                                                                                                                                                              | High      |
| 36                              | 7.02 | Will any of these vectors/pathways bring the taxon in close proximity to one or more protected areas (e.g. MCZ, MPA, SSSI)?                                        | Yes            | This species was found in the Aktaş/Kartsakhi Lake which is located on the border of Georgia-Turkey and Georgian side of the lake is part of the Javakheti Protected Areas.                                                                                                    | High      |
| 37                              | 7.03 | Does the taxon have a means of actively attaching itself to hard substrata (e.g. ship hulls, pilings, buoys) such that it enhances the likelihood of dispersal?    | No             | This species has not such means                                                                                                                                                                                                                                                | High      |
| 38                              | 7.04 | Is natural dispersal of the taxon likely to occur as eggs (for animals) or as propagules (for plants: seeds, spores) in the RA area?                               | No             | No such fact has been detected in the Caucasus region                                                                                                                                                                                                                          | High      |
| 39                              | 7.05 | Is natural dispersal of the taxon likely to occur as larvae/juveniles (for animals) or as fragments/seedlings (for plants) in the RA area?                         | No             | No such fact has been detected in the Caucasus region                                                                                                                                                                                                                          | High      |
| 40                              | 7.06 | Are older life stages of the taxon likely to migrate in the RA area for reproduction?                                                                              | No             | This species has landlocked populations within the South Caucasus region and occurring in the several lakes such as: Paravani, Tabatskuri, Sevan and Kartsakhi. Therefore it is not                                                                                            | Very high |
| 41                              | 7.07 | Are propagules or eggs of the taxon likely to be dispersed in the RA area by other animals?                                                                        | No             | No such fact has been detected                                                                                                                                                                                                                                                 | High      |
| 42                              | 7.08 | Is dispersal of the taxon along any of the vectors/pathways mentioned in the previous seven questions (35-41; i.e. both unintentional or intentional) likely to be | Not applicable | Such data is not available.                                                                                                                                                                                                                                                    | Low       |
| 43                              | 7.09 | Is dispersal of the taxon density dependent?                                                                                                                       | Not applicable | Such data is not available.                                                                                                                                                                                                                                                    | Low       |
| <b>8. Tolerance attributes</b>  |      |                                                                                                                                                                    |                |                                                                                                                                                                                                                                                                                |           |
| 44                              | 8.01 | Is the taxon able to withstand being out of water for extended periods (e.g. minimum of one or more hours) at some stage of its life cycle?                        | No             | No such fact has been detected.                                                                                                                                                                                                                                                | High      |

|    |      |                                                                                                                                                                                           |                |                                                                                                                                                                                                                                                                                                                                                                                                                                                                                                                                                                             |        |
|----|------|-------------------------------------------------------------------------------------------------------------------------------------------------------------------------------------------|----------------|-----------------------------------------------------------------------------------------------------------------------------------------------------------------------------------------------------------------------------------------------------------------------------------------------------------------------------------------------------------------------------------------------------------------------------------------------------------------------------------------------------------------------------------------------------------------------------|--------|
| 45 | 8.02 | Is the taxon tolerant of a wide range of water quality conditions relevant to that taxon? [In the Justification field, indicate the relevant water quality variable(s) being considered.] | No             | Low pH (pH 4.75 and 5.00) associated with 1.0-1.1 mg l <sup>-1</sup> Mn and 0.1 mg l <sup>-1</sup> Fe did not reduce hatching success and survival during the embryonic and early larval development in <i>Coregonus albula</i> population when the A1 concentration was low (0.1-0.2 mg l <sup>-1</sup> ~). However, when the A1 content was increased to 2.4 and 2.1 mg l <sup>-1</sup> at pH 4.75 and 5.00, respectively, mortality prior to hatch was high, no (pH 4.75) or very few embryos (pH 5.00) hatched, and no fish survived to the end of the experiment (DUIS | Medium |
| 46 | 8.03 | Can the taxon be controlled or eradicated in the wild with chemical, biological, or other agents/means?                                                                                   | Not applicable | Such data is not available                                                                                                                                                                                                                                                                                                                                                                                                                                                                                                                                                  | Low    |
| 47 | 8.04 | Is the taxon likely to tolerate or benefit from environmental/human disturbance?                                                                                                          | No             | Such data is not available                                                                                                                                                                                                                                                                                                                                                                                                                                                                                                                                                  | Medium |
| 48 | 8.05 | Is the taxon able to tolerate salinity levels that are higher or lower than those found in its usual environment?                                                                         | Yes            | <i>C. albula</i> and <i>C. lavaretus</i> are species which, as adults, migrate into brackish water with salinities of 10 to 18 ‰ or higher (Nellen, 1965)                                                                                                                                                                                                                                                                                                                                                                                                                   | High   |
| 49 | 8.06 | Are there effective natural enemies (predators) of the taxon present in the RA area?                                                                                                      | Yes            | In the Caucasus region there are distributed several species which should be considered as potential predators for <i>C. albula</i> . These species are <i>S. ischchan</i> , <i>S. labrax</i> , <i>S. caspius</i> , etc. according to Kulianishvili et al. (2020)                                                                                                                                                                                                                                                                                                           | High   |

#### C. Climate change

##### 9. Climate change

|    |      |                                                                                                                                                              |          |                                                                                                                                                                                                                                                                                                                                                   |      |
|----|------|--------------------------------------------------------------------------------------------------------------------------------------------------------------|----------|---------------------------------------------------------------------------------------------------------------------------------------------------------------------------------------------------------------------------------------------------------------------------------------------------------------------------------------------------|------|
| 50 | 9.01 | Under the predicted future climatic conditions, are the risks of entry into the RA area posed by the taxon likely to increase, decrease or not change?       | Decrease | <i>C. albula</i> has limited distribution range in the Caucasus region and future climatic conditions will lead to a deterioration of its living environment which represents the alpine lakes in the region. Water temperatures are expected to rise in these lakes, which will lead to a deterioration in the living conditions for these fish. | High |
| 51 | 9.02 | Under the predicted future climatic conditions, are the risks of establishment posed by the taxon likely to increase, decrease or not change?                | Decrease | <i>C. albula</i> has limited distribution range in the Caucasus region and future climatic conditions will lead to a deterioration of its living environment which represents the alpine lakes in the region. Water temperatures are expected to rise in these lakes, which will lead to a deterioration in the living conditions for these fish. | High |
| 52 | 9.03 | Under the predicted future climatic conditions, are the risks of dispersal within the RA area posed by the taxon likely to increase, decrease or not change? | Decrease | <i>C. albula</i> has limited distribution range in the Caucasus region and future climatic conditions will lead to a deterioration of its living environment which represents the alpine lakes in the region. Water temperatures are expected to rise in these lakes, which will lead to a deterioration in the living conditions for these fish. | High |
| 53 | 9.04 | Under the predicted future climatic conditions, what is the likely magnitude of future potential impacts on biodiversity and/or ecological integrity/status? | Lower    | Own judgement                                                                                                                                                                                                                                                                                                                                     | High |
| 54 | 9.05 | Under the predicted future climatic conditions, what is the likely magnitude of future potential impacts on ecosystem structure and/or function?             | Lower    | Own judgement                                                                                                                                                                                                                                                                                                                                     | High |
| 55 | 9.06 | Under the predicted future climatic conditions, what is the likely magnitude of future potential impacts on ecosystem services/socio-economic factors?       | Lower    | Own judgement                                                                                                                                                                                                                                                                                                                                     | High |

| Statistics                                     |       |
|------------------------------------------------|-------|
| Scores                                         |       |
| BRA                                            | 19.5  |
| BRA Outcome                                    | -     |
| BRA+CCA                                        | 7.5   |
| BRA+CCA Outcome                                | -     |
| Score partition                                |       |
| A. Biogeography/Historical                     | 9.5   |
| 1. Domestication/Cultivation                   | 4.0   |
| 2. Climate, distribution and introduction risk | 1.0   |
| 3. Invasive elsewhere                          | 4.5   |
| B. Biology/Ecology                             | 10.0  |
| 4. Undesirable (or persistence) traits         | 6.0   |
| 5. Resource exploitation                       | 5.0   |
| 6. Reproduction                                | 4.0   |
| 7. Dispersal mechanisms                        | -4.0  |
| 8. Tolerance attributes                        | -1.0  |
| C. Climate change                              | -12.0 |
| 9. Climate change                              | -12.0 |
| Answered Questions                             |       |
| Total                                          | 55    |
| A. Biogeography/Historical                     | 13    |
| 1. Domestication/Cultivation                   | 3     |
| 2. Climate, distribution and introduction risk | 5     |
| 3. Invasive elsewhere                          | 5     |
| B. Biology/Ecology                             | 36    |
| 4. Undesirable (or persistence) traits         | 12    |
| 5. Resource exploitation                       | 2     |
| 6. Reproduction                                | 7     |
| 7. Dispersal mechanisms                        | 9     |
| 8. Tolerance attributes                        | 6     |
| C. Climate change                              | 6     |
| 9. Climate change                              | 6     |
| Sectors affected                               |       |
| Commercial                                     | 5     |

|                                              |          |
|----------------------------------------------|----------|
| <b>Environmental</b>                         | <b>3</b> |
| <b>Species or population nuisance traits</b> | <b>2</b> |

|                   |                |             |
|-------------------|----------------|-------------|
| <b>Thresholds</b> |                |             |
|                   | <b>BRA</b>     | <b>-</b>    |
|                   | <b>BRA+CCA</b> | <b>-</b>    |
| <b>Confidence</b> |                |             |
|                   | <b>BRA+CCA</b> | <b>0.68</b> |
|                   | <b>BRA</b>     | <b>0.67</b> |
|                   | <b>CCA</b>     | <b>0.75</b> |

|                            |  |
|----------------------------|--|
| <b>Date and Time</b>       |  |
| <b>03/05/2022 16:08:20</b> |  |



## AS-ISK v2

| Taxon and Assessor details         |                                                                                                                           |
|------------------------------------|---------------------------------------------------------------------------------------------------------------------------|
| Category                           | Fishes and Lampreys (freshwater)                                                                                          |
| Taxon name                         | <i>Coregonus albula</i>                                                                                                   |
| Common name                        | vendace                                                                                                                   |
| Assessor                           | Tatia Kuljanishvili                                                                                                       |
| Risk screening context             |                                                                                                                           |
| Reason and socio-economic benefits | It was introduced from the Volkhov hatchery at Lake Ladoga (Russia) to southern Georgia, in Lakes                         |
| Risk assessment area               | South Caucasus                                                                                                            |
| Taxonomy                           | Actinopteri (ray-finned fishes) > Salmoniformes (Salmons) > Salmonidae (Salmonids) >                                      |
| Native range                       | the Baltic Sea basin, lakes of the upper Volga River drainage, and also in some lakes of the White                        |
| Introduced range                   | Lakes of Javakheti Upland                                                                                                 |
| URL                                | <a href="https://www.fishbase.se/summary/Coregonus-albula.html">https://www.fishbase.se/summary/Coregonus-albula.html</a> |

|                                                |      |                                                                                                                                                                         | Response       | Justification (references and/or other information)                                                                                                                                                                                                                                                                                                                                                                                                                                                                                                                                              | Confidence |
|------------------------------------------------|------|-------------------------------------------------------------------------------------------------------------------------------------------------------------------------|----------------|--------------------------------------------------------------------------------------------------------------------------------------------------------------------------------------------------------------------------------------------------------------------------------------------------------------------------------------------------------------------------------------------------------------------------------------------------------------------------------------------------------------------------------------------------------------------------------------------------|------------|
| A. Biogeography/Historical                     |      |                                                                                                                                                                         |                |                                                                                                                                                                                                                                                                                                                                                                                                                                                                                                                                                                                                  |            |
| 1. Domestication/Cultivation                   |      |                                                                                                                                                                         |                |                                                                                                                                                                                                                                                                                                                                                                                                                                                                                                                                                                                                  |            |
| 1                                              | 1.01 | Has the taxon been the subject of domestication (or cultivation) for at least 20 generations?                                                                           | Yes            | Has been a subject for stocking. This species were reproduced and transported from Russia to Georgia. and in Georgia, this species has been bred and stocked regularly during past century (Japoshvili et al 2012; Kuljanishvili et al 2018).                                                                                                                                                                                                                                                                                                                                                    | Very high  |
| 2                                              | 1.02 | Is the taxon harvested in the wild and likely to be sold or used in its live form?                                                                                      | Yes            | Since the species is the commercially valuable, it is being harvested from the wild, and it can also be sold in its live form, for commercial purposes.                                                                                                                                                                                                                                                                                                                                                                                                                                          | Very high  |
| 3                                              | 1.03 | Does the taxon have invasive races, varieties, sub-taxa or congeners?                                                                                                   | No             | Congeners of C. alba are not known to be serious pests                                                                                                                                                                                                                                                                                                                                                                                                                                                                                                                                           | High       |
| 2. Climate, distribution and introduction risk |      |                                                                                                                                                                         |                |                                                                                                                                                                                                                                                                                                                                                                                                                                                                                                                                                                                                  |            |
| 4                                              | 2.01 | How similar are the climatic conditions of the Risk Assessment (RA) area and the taxon's native range?                                                                  | High           | it is similar in high altitude areas. But in lowlands it is not.                                                                                                                                                                                                                                                                                                                                                                                                                                                                                                                                 | Medium     |
| 5                                              | 2.02 | What is the quality of the climate matching data?                                                                                                                       | High           | out of 10 stations, 5 stations in mountainous areas have matched                                                                                                                                                                                                                                                                                                                                                                                                                                                                                                                                 | High       |
| 6                                              | 2.03 | Is the taxon already present outside of captivity in the RA area?                                                                                                       | Yes            | It occurs in the lake Saghamo at least confirmed by catch (Kuljanishvili et al 2018).                                                                                                                                                                                                                                                                                                                                                                                                                                                                                                            | Very high  |
| 7                                              | 2.04 | How many potential vectors could the taxon use to enter in the RA area?                                                                                                 | One            | Only quaculture                                                                                                                                                                                                                                                                                                                                                                                                                                                                                                                                                                                  | High       |
| 8                                              | 2.05 | Is the taxon currently found in close proximity to, and likely to enter into, the RA area in the near future (e.g. unintentional and intentional introductions)?        | Yes            | Young individuals of the fish are being found in Saghamo lake. Documented by Kuljanishvili et al 2018                                                                                                                                                                                                                                                                                                                                                                                                                                                                                            | High       |
| 3. Invasive elsewhere                          |      |                                                                                                                                                                         |                |                                                                                                                                                                                                                                                                                                                                                                                                                                                                                                                                                                                                  |            |
| 9                                              | 3.01 | Has the taxon become naturalised (established viable populations) outside its native range?                                                                             | Yes            | In the beginning, of C. albula introduction, local hatcheries were involved in artificial reproduction of C. albula and release of young fry into the lake (Japoshvili 2012). However, as of 2005, these hatcheries ceased operation and it was expected that C. albula populations would become extinct over time. However, twelve years later young individuals were found in Saghamo Lake, which is connected to Paravani Lake by the Paravani River. This meant that they had become naturalized in the area, although the population density was extremely low (Kuljanishvili et al. 2018). | High       |
| 10                                             | 3.02 | In the taxon's introduced range, are there known adverse impacts to wild stocks or commercial taxa?                                                                     | No             | There no adverse impacts documented in Georgia. However, one might assume that it could be altering the native food web via selective preying on zooplanktonic organisms (Savini et al 2010).                                                                                                                                                                                                                                                                                                                                                                                                    | Medium     |
| 11                                             | 3.03 | In the taxon's introduced range, are there known adverse impacts to aquaculture?                                                                                        | No             | No adverse impacts on aquaculture is known in Georgia.                                                                                                                                                                                                                                                                                                                                                                                                                                                                                                                                           | Very high  |
| 12                                             | 3.04 | In the taxon's introduced range, are there known adverse impacts to ecosystem                                                                                           | No             | No adverse impacts on ecosystem is known in Georgia. Possible can be transmitting parasites or diseases                                                                                                                                                                                                                                                                                                                                                                                                                                                                                          | Medium     |
| 13                                             | 3.05 | In the taxon's introduced range, are there known adverse socio-economic impacts?                                                                                        | No             | No adverse socio-economic impacts is known in Georgia.                                                                                                                                                                                                                                                                                                                                                                                                                                                                                                                                           | High       |
| B. Biology/Ecology                             |      |                                                                                                                                                                         |                |                                                                                                                                                                                                                                                                                                                                                                                                                                                                                                                                                                                                  |            |
| 4. Undesirable (or persistence) traits         |      |                                                                                                                                                                         |                |                                                                                                                                                                                                                                                                                                                                                                                                                                                                                                                                                                                                  |            |
| 14                                             | 4.01 | Is it likely that the taxon will be poisonous or pose other risks to human health?                                                                                      | No             | Is not poisonous or pose other risks to human health                                                                                                                                                                                                                                                                                                                                                                                                                                                                                                                                             | Very high  |
| 15                                             | 4.02 | Is it likely that the taxon will smother one or more native taxa (that are not threatened or protected)?                                                                | No             | Impact of introduced C. albula on native taxa can only be alteration of native food webs (Savini et al 2010).                                                                                                                                                                                                                                                                                                                                                                                                                                                                                    | High       |
| 16                                             | 4.03 | Are there any threatened or protected taxa that the non-native taxon would parasitise in the RA area?                                                                   | No             | No.                                                                                                                                                                                                                                                                                                                                                                                                                                                                                                                                                                                              | Very high  |
| 17                                             | 4.04 | Is the taxon adaptable in terms of climatic and other environmental conditions, thus enhancing its potential persistence if it has invaded or could invade the RA area? | No             | Coregonids are Coldwater fishes and they require cold environment. they can not adapt variable climatic environments.                                                                                                                                                                                                                                                                                                                                                                                                                                                                            | High       |
| 18                                             | 4.05 | Is the taxon likely to disrupt food-web structure/function in aquatic ecosystems if it has invaded or is likely to invade the RA                                        | Yes            | May alter the food webs by selective preying on zooplankton                                                                                                                                                                                                                                                                                                                                                                                                                                                                                                                                      | High       |
| 19                                             | 4.06 | Is the taxon likely to exert adverse impacts on ecosystem services in the RA area?                                                                                      | No             | No. No data. less likely                                                                                                                                                                                                                                                                                                                                                                                                                                                                                                                                                                         | Very high  |
| 20                                             | 4.07 | Is it likely that the taxon will host, and/or act as a vector for, recognised pests and infectious agents that are endemic in the RA                                    | Not applicable | No information available                                                                                                                                                                                                                                                                                                                                                                                                                                                                                                                                                                         | Medium     |

|                                 |      |                                                                                                                                                                              |     |                                                                                                                                                           |           |
|---------------------------------|------|------------------------------------------------------------------------------------------------------------------------------------------------------------------------------|-----|-----------------------------------------------------------------------------------------------------------------------------------------------------------|-----------|
| 21                              | 4.08 | Is it likely that the taxon will host, and/or act as a vector for, recognised pests and infectious agents that are absent from (novel to) the RA area?                       | Yes | It is possible.                                                                                                                                           | Medium    |
| 22                              | 4.09 | Is it likely that the taxon will achieve a body size that will make it more likely to be released from captivity?                                                            | Yes | It is usually released in the wild sine small fry.                                                                                                        | Very high |
| 23                              | 4.10 | Is the taxon capable of sustaining itself in a range of water velocity conditions (e.g. versatile in habitat use)?                                                           | Yes | This species is anadromous, marine, or can form landlocked populations as well (Kottelat & Freyhof 2007).                                                 | High      |
| 24                              | 4.11 | Is it likely that the taxon's mode of existence (e.g. excretion of by-products) or behaviours (e.g. feeding) will reduce habitat quality for native taxa?                    | No  | No. less likely, no documentation.                                                                                                                        | High      |
| 25                              | 4.12 | Is the taxon likely to maintain a viable population even when present in low densities (or persisting in adverse conditions by way of a dormant form)?                       | Yes | It usually spawns for the first time at the age of 2-5 years old. in case of overfishing it might not be able to have viable population in low densities. | Medium    |
| <b>5. Resource exploitation</b> |      |                                                                                                                                                                              |     |                                                                                                                                                           |           |
| 26                              | 5.01 | Is the taxon likely to consume threatened or protected native taxa in the RA area?                                                                                           | No  | Not a predator, eats plankton only.                                                                                                                       | High      |
| 27                              | 5.02 | Is the taxon likely to sequester food resources (including nutrients) to the detriment of native taxa in the RA area?                                                        | No  | It is quite unlikely.                                                                                                                                     | Medium    |
| <b>6. Reproduction</b>          |      |                                                                                                                                                                              |     |                                                                                                                                                           |           |
| 28                              | 6.01 | Is the taxon likely to exhibit parental care and/or to reduce age-at-maturity in response to environmental conditions?                                                       | No  | No.No info.                                                                                                                                               | Very high |
| 29                              | 6.02 | Is the taxon likely to produce viable gametes or propagules (in the RA area)?                                                                                                | Yes | The conditions for maturation are available in the RA area                                                                                                | High      |
| 30                              | 6.03 | Is the taxon likely to hybridise naturally with native taxa?                                                                                                                 | No  | There are no native coregonids in RA area.                                                                                                                | High      |
| 31                              | 6.04 | Is the taxon likely to be hermaphroditic or to display asexual reproduction?                                                                                                 | No  | No does not display asexual reproduction.                                                                                                                 | Very high |
| 32                              | 6.05 | Is the taxon dependent on the presence of another taxon (or specific habitat features) to complete its life cycle?                                                           | No  | Not dependent on another taxon to complete its life cycle                                                                                                 | Very high |
| 33                              | 6.06 | Is the taxon known (or likely) to produce a large number of propagules or offspring within a short time span (e.g. < 1 year)?                                                | No  | Not known                                                                                                                                                 | Very high |
| 34                              | 6.07 | How many time units (days, months, years) does the taxon require to reach the age-at-first-reproduction?                                                                     | 3   | From 2 to 5 years                                                                                                                                         | High      |
| <b>7. Dispersal mechanisms</b>  |      |                                                                                                                                                                              |     |                                                                                                                                                           |           |
| 35                              | 7.01 | How many potential internal vectors/pathways could the taxon use to disperse within the RA area (with suitable)                                                              | One | Aquaculture                                                                                                                                               | High      |
| 36                              | 7.02 | Will any of these vectors/pathways bring the taxon in close proximity to one or more protected areas (e.g. MCZ, MPA, SSSI)?                                                  | No  | Stocking is not allowed in protected areas                                                                                                                | High      |
| 37                              | 7.03 | Does the taxon have a means of actively attaching itself to hard substrata (e.g. ship hulls, pilings, buoys) such that it enhances the likelihood of dispersal?              | No  | No. does not attach to any surface.                                                                                                                       | Very high |
| 38                              | 7.04 | Is natural dispersal of the taxon likely to occur as eggs (for animals) or as propagules (for plants: seeds, spores) in the RA area?                                         | No  | Less likely.                                                                                                                                              | High      |
| 39                              | 7.05 | Is natural dispersal of the taxon likely to occur as larvae/juveniles (for animals) or as fragments/seedlings (for plants) in the RA area?                                   | No  | less likely.                                                                                                                                              | High      |
| 40                              | 7.06 | Are older life stages of the taxon likely to migrate in the RA area for reproduction?                                                                                        | No  | No. does not migrate.                                                                                                                                     | Very high |
| 41                              | 7.07 | Are propagules or eggs of the taxon likely to be dispersed in the RA area by other animals?                                                                                  | No  | No. not possible.                                                                                                                                         | Very high |
| 42                              | 7.08 | Is dispersal of the taxon along any of the vectors/pathways mentioned in the previous seven questions (35–41; i.e. both unintentional or intentional) likely to be           | No  | As far as we know, no.                                                                                                                                    | High      |
| 43                              | 7.09 | Is dispersal of the taxon density dependent?                                                                                                                                 | No  | It is not known                                                                                                                                           | Medium    |
| <b>8. Tolerance attributes</b>  |      |                                                                                                                                                                              |     |                                                                                                                                                           |           |
| 44                              | 8.01 | Is the taxon able to withstand being out of water for extended periods (e.g. minimum of one or more hours) at some stage of its life cycle?                                  | No  | No.can not withstand being out of water for long                                                                                                          | Very high |
| 45                              | 8.02 | Is the taxon tolerant of a wide range of water quality conditions relevant to that taxon? [In the Justification field, indicate the relevant water quality variable(s) being | No  | This species requires specific conditions and are not tolerant to wide range of water quality conditions                                                  | High      |
| 46                              | 8.03 | Can the taxon be controlled or eradicated in the wild with chemical, biological, or other agents/means?                                                                      | No  | No, it can not be.                                                                                                                                        | High      |
| 47                              | 8.04 | Is the taxon likely to tolerate or benefit from environmental/human disturbance?                                                                                             | No  | No data                                                                                                                                                   | High      |

|                          |      |                                                                                                                                                              |          |                                                                                                                                                                                                                                                      |           |
|--------------------------|------|--------------------------------------------------------------------------------------------------------------------------------------------------------------|----------|------------------------------------------------------------------------------------------------------------------------------------------------------------------------------------------------------------------------------------------------------|-----------|
| 48                       | 8.05 | Is the taxon able to tolerate salinity levels that are higher or lower than those found in its usual environment?                                            | Yes      | I guess it can tolerate salinity levels since it can be anadromous, freshwater or marine fish.                                                                                                                                                       | Low       |
| 49                       | 8.06 | Are there effective natural enemies (predators) of the taxon present in the RA                                                                               | No       | No. Not documented                                                                                                                                                                                                                                   | High      |
| <b>C. Climate change</b> |      |                                                                                                                                                              |          |                                                                                                                                                                                                                                                      |           |
| <b>9. Climate change</b> |      |                                                                                                                                                              |          |                                                                                                                                                                                                                                                      |           |
| 50                       | 9.01 | Under the predicted future climatic conditions, are the risks of entry into the RA area posed by the taxon likely to increase, decrease or not change?       | Increase | It was hypothesized that climate change might alert the mechanisms of transportation and introduction of non-native species. Commercial and recreational activities will increase, that itself increases the propagule pressure levels of non-native | Very high |
| 51                       | 9.02 | Under the predicted future climatic conditions, are the risks of establishment posed by the taxon likely to increase, decrease or not change?                | Decrease | In terms of increased temperatures this species will be having troubles to survive in the wild                                                                                                                                                       | High      |
| 52                       | 9.03 | Under the predicted future climatic conditions, are the risks of dispersal within the RA area posed by the taxon likely to increase, decrease or not change? | Decrease | Increased temperatures will cause stress in their populations making their populations weaker, therefore it won't be available to disperse                                                                                                           | High      |
| 53                       | 9.04 | Under the predicted future climatic conditions, what is the likely magnitude of future potential impacts on biodiversity and/or ecological integrity/status? | Lower    | The environment for them will be unbearable and this species populations will decrease, making the impact lower.                                                                                                                                     | High      |
| 54                       | 9.05 | Under the predicted future climatic conditions, what is the likely magnitude of future potential impacts on ecosystem structure and/or function?             | Lower    | If there is any, in future it will be lower.                                                                                                                                                                                                         | High      |
| 55                       | 9.06 | Under the predicted future climatic conditions, what is the likely magnitude of future potential impacts on ecosystem services/socio-economic factors?       | Lower    | The magnitude of future potential impact is low.                                                                                                                                                                                                     | High      |

| Statistics                                     |             |
|------------------------------------------------|-------------|
| Scores                                         |             |
| <b>BRA</b>                                     | <b>5.0</b>  |
| <b>BRA Outcome</b>                             | <b>-</b>    |
| <b>BRA+CCA</b>                                 | <b>-3.0</b> |
| <b>BRA+CCA Outcome</b>                         | <b>-</b>    |
| Score partition                                |             |
| <b>A. Biogeography/Historical</b>              | <b>5.0</b>  |
| 1. Domestication/Cultivation                   | 2.0         |
| 2. Climate, distribution and introduction risk | 1.0         |
| 3. Invasive elsewhere                          | 2.0         |
| <b>B. Biology/Ecology</b>                      | <b>0.0</b>  |
| 4. Undesirable (or persistence) traits         | 4.0         |
| 5. Resource exploitation                       | 0.0         |
| 6. Reproduction                                | 0.0         |
| 7. Dispersal mechanisms                        | -5.0        |
| 8. Tolerance attributes                        | 1.0         |
| <b>C. Climate change</b>                       | <b>-8.0</b> |
| 9. Climate change                              | -8.0        |
| Answered Questions                             |             |
| <b>Total</b>                                   | <b>55</b>   |
| <b>A. Biogeography/Historical</b>              | <b>13</b>   |
| 1. Domestication/Cultivation                   | 3           |
| 2. Climate, distribution and introduction risk | 5           |
| 3. Invasive elsewhere                          | 5           |
| <b>B. Biology/Ecology</b>                      | <b>36</b>   |
| 4. Undesirable (or persistence) traits         | 12          |
| 5. Resource exploitation                       | 2           |
| 6. Reproduction                                | 7           |
| 7. Dispersal mechanisms                        | 9           |
| 8. Tolerance attributes                        | 6           |
| <b>C. Climate change</b>                       | <b>6</b>    |
| 9. Climate change                              | 6           |
| Sectors affected                               |             |
| <b>Commercial</b>                              | <b>2</b>    |
| <b>Environmental</b>                           | <b>-3</b>   |
| <b>Species or population nuisance traits</b>   | <b>-1</b>   |

| Thresholds     |             |
|----------------|-------------|
| <b>BRA</b>     | <b>-</b>    |
| <b>BRA+CCA</b> | <b>-</b>    |
| Confidence     |             |
| <b>BRA+CCA</b> | <b>0.78</b> |
| <b>BRA</b>     | <b>0.78</b> |
| <b>CCA</b>     | <b>0.79</b> |

| Date and Time       |
|---------------------|
| 20/05/2022 16:35:23 |

## AS-ISK v2

| Taxon and Assessor details         |                                                                                                     |
|------------------------------------|-----------------------------------------------------------------------------------------------------|
| Category                           | Fishes and Lampreys (freshwater)                                                                    |
| Taxon name                         | <i>Coregonus sp.</i>                                                                                |
| Common name                        | -                                                                                                   |
| Assessor                           | Bella Japoshvili                                                                                    |
| Risk screening context             |                                                                                                     |
| Reason and socio-economic benefits | This taxa was introduced in sevan with probably other congeners. It is still there having important |
| Risk assessment area               | South Caucasus                                                                                      |
| Taxonomy                           | Actinopteri (ray-finned fishes) > Salmoniformes (Salmons) > Salmonidae (Salmonids)                  |
| Native range                       | North Russia                                                                                        |
| Introduced range                   | South Caucasus                                                                                      |
| URL                                |                                                                                                     |

|                                                |      |                                                                                                                                                                         | Response | Justification (references and/or other information)                                                                                                                                                                                                                                                                                                                          | Confidence |
|------------------------------------------------|------|-------------------------------------------------------------------------------------------------------------------------------------------------------------------------|----------|------------------------------------------------------------------------------------------------------------------------------------------------------------------------------------------------------------------------------------------------------------------------------------------------------------------------------------------------------------------------------|------------|
| A. Biogeography/Historical                     |      |                                                                                                                                                                         |          |                                                                                                                                                                                                                                                                                                                                                                              |            |
| 1. Domestication/Cultivation                   |      |                                                                                                                                                                         |          |                                                                                                                                                                                                                                                                                                                                                                              |            |
| 1                                              | 1.01 | Has the taxon been the subject of domestication (or cultivation) for at least 20 generations?                                                                           | Yes      | Dadikyan MG. 1964. Towards the Results of Intriduction of Coregonids (Coregonus lavaretus maraenoides Poljakow, C. lavaretus ludoga Poljakow) in the Lake Sevan. Proc Acad Sci Armenian SSR (in Russian) 17: 41-48                                                                                                                                                           | Very high  |
| 2                                              | 1.02 | Is the taxon harvested in the wild and likely to be sold or used in its live form?                                                                                      | Yes      | Personal observation - harvested and imported in RA area as well as harvested and sold Within RA area                                                                                                                                                                                                                                                                        | High       |
| 3                                              | 1.03 | Does the taxon have invasive races, varieties, sub-taxa or congeners?                                                                                                   | Yes      | Other coregonus species                                                                                                                                                                                                                                                                                                                                                      | High       |
| 2. Climate, distribution and introduction risk |      |                                                                                                                                                                         |          |                                                                                                                                                                                                                                                                                                                                                                              |            |
| 4                                              | 2.01 | How similar are the climatic conditions of the Risk Assessment (RA) area and the taxon's native range?                                                                  | Low      | Climatch shows no high similarity                                                                                                                                                                                                                                                                                                                                            | Medium     |
| 5                                              | 2.02 | What is the quality of the climate matching data?                                                                                                                       | Low      | Due to absence of extensive local climate data in RA area                                                                                                                                                                                                                                                                                                                    | High       |
| 6                                              | 2.03 | Is the taxon already present outside of captivity in the RA area?                                                                                                       | Yes      | Kuljanishvili, T., Mumladze, L., Kalous, L., & Japoshvili, B. (2018). Fish species composition, sex ratio and growth parameters in Saghamo Lake (Southern Georgia). Biologia, 73(1), 93-100.                                                                                                                                                                                 | Very high  |
| 7                                              | 2.04 | How many potential vectors could the taxon use to enter in the RA area?                                                                                                 | None     | Human mediated translocation                                                                                                                                                                                                                                                                                                                                                 | High       |
| 8                                              | 2.05 | Is the taxon currently found in close proximity to, and likely to enter into, the RA area in the near future (e.g. unintentional and intentional introductions)?        | Yes      | It is already in RA area Kuljanishvili, T., Mumladze, L., Kalous, L., & Japoshvili, B. (2018). Fish species composition, sex ratio and growth parameters in Saghamo Lake (Southern Georgia). Biologia, 73(1), 93-100.                                                                                                                                                        | Very high  |
| 3. Invasive elsewhere                          |      |                                                                                                                                                                         |          |                                                                                                                                                                                                                                                                                                                                                                              |            |
| 9                                              | 3.01 | Has the taxon become naturalised (established viable populations) outside its native range?                                                                             | Yes      | The taxon is already in Sevan lake for a long. But due to repeated releasing fry in the lake it is not known if it creates viable population in the lake. On the other hand The species was also released into the Georgian lakes once and the did not survived Elanidze R. 1983. Ichthyofauna of the rivers and lakes of Georgia, Metsniereba (in Russian) Tbilisi, p. 320. | Low        |
| 10                                             | 3.02 | In the taxon's introduced range, are there known adverse impacts to wild stocks or commercial taxa?                                                                     | No       | No such an evidence exists                                                                                                                                                                                                                                                                                                                                                   | Medium     |
| 11                                             | 3.03 | In the taxon's introduced range, are there known adverse impacts to aquaculture?                                                                                        | No       | No documented evidence exists                                                                                                                                                                                                                                                                                                                                                | Medium     |
| 12                                             | 3.04 | In the taxon's introduced range, are there known adverse impacts to ecosystem                                                                                           | No       | No documented evidence exists                                                                                                                                                                                                                                                                                                                                                | Medium     |
| 13                                             | 3.05 | In the taxon's introduced range, are there known adverse socio-economic impacts?                                                                                        | No       | No documented evidence exists                                                                                                                                                                                                                                                                                                                                                | Medium     |
| B. Biology/Ecology                             |      |                                                                                                                                                                         |          |                                                                                                                                                                                                                                                                                                                                                                              |            |
| 4. Undesirable (or persistence) traits         |      |                                                                                                                                                                         |          |                                                                                                                                                                                                                                                                                                                                                                              |            |
| 14                                             | 4.01 | Is it likely that the taxon will be poisonous or pose other risks to human health?                                                                                      | No       | Is not harmful species                                                                                                                                                                                                                                                                                                                                                       | High       |
| 15                                             | 4.02 | Is it likely that the taxon will smother one or more native taxa (that are not threatened or protected)?                                                                | Yes      | No documented evidence exists                                                                                                                                                                                                                                                                                                                                                | Low        |
| 16                                             | 4.03 | Are there any threatened or protected taxa that the non-native taxon would parasitise in the RA area?                                                                   | No       | Species is not parasite exists                                                                                                                                                                                                                                                                                                                                               | Very high  |
| 17                                             | 4.04 | Is the taxon adaptable in terms of climatic and other environmental conditions, thus enhancing its potential persistence if it has invaded or could invade the RA area? | No       | No documented evidence exists                                                                                                                                                                                                                                                                                                                                                | Medium     |
| 18                                             | 4.05 | Is the taxon likely to disrupt food-web structure/function in aquatic ecosystems if it has invaded or is likely to invade the RA area?                                  | Yes      | No documented evidence exists                                                                                                                                                                                                                                                                                                                                                | Low        |
| 19                                             | 4.06 | Is the taxon likely to exert adverse impacts on ecosystem services in the RA area?                                                                                      | No       | Not expected based on personal judgment                                                                                                                                                                                                                                                                                                                                      | High       |
| 20                                             | 4.07 | Is it likely that the taxon will host, and/or act as a vector for, recognised pests and infectious agents that are endemic in the RA area?                              | No       | No documented evidence exists                                                                                                                                                                                                                                                                                                                                                | Low        |
| 21                                             | 4.08 | Is it likely that the taxon will host, and/or act as a vector for, recognised pests and infectious agents that are absent from (novel to) the RA area?                  | Yes      | No documented evidence exists                                                                                                                                                                                                                                                                                                                                                | Low        |

|                                 |      |                                                                                                                                                                               |     |                                                                                                                    |           |
|---------------------------------|------|-------------------------------------------------------------------------------------------------------------------------------------------------------------------------------|-----|--------------------------------------------------------------------------------------------------------------------|-----------|
| 22                              | 4.09 | Is it likely that the taxon will achieve a body size that will make it more likely to be released from captivity?                                                             | No  | It is usually released into the natural waterbodies                                                                | High      |
| 23                              | 4.10 | Is the taxon capable of sustaining itself in a range of water velocity conditions (e.g. versatile in habitat use)?                                                            | No  | Not a migratory species and no evidence of such capabilities                                                       | Medium    |
| 24                              | 4.11 | Is it likely that the taxon's mode of existence (e.g. excretion of by-products) or behaviours (e.g. feeding) will reduce habitat quality for native taxa?                     | No  | No documented evidence exists                                                                                      | Low       |
| 25                              | 4.12 | Is the taxon likely to maintain a viable population even when present in low densities (or persisting in adverse conditions by way of a dormant form)?                        | No  | No documented evidence exists                                                                                      | Low       |
| <b>5. Resource exploitation</b> |      |                                                                                                                                                                               |     |                                                                                                                    |           |
| 26                              | 5.01 | Is the taxon likely to consume threatened or protected native taxa in the RA area?                                                                                            | No  | Since the species is plankton feeder, there is no such taxa protected or threatened in RA area                     | High      |
| 27                              | 5.02 | Is the taxon likely to sequester food resources (including nutrients) to the detriment of native taxa in the RA area?                                                         | Yes | It can reach to high density and consume most of the planktonic resource                                           | Medium    |
| <b>6. Reproduction</b>          |      |                                                                                                                                                                               |     |                                                                                                                    |           |
| 28                              | 6.01 | Is the taxon likely to exhibit parental care and/or to reduce age-at-maturity in response to environmental conditions?                                                        | No  | No such an evidence exists                                                                                         | Very high |
| 29                              | 6.02 | Is the taxon likely to produce viable gametes or propagules (in the RA area)?                                                                                                 | Yes | Expected but not a documented evidence exists                                                                      | Low       |
| 30                              | 6.03 | Is the taxon likely to hybridise naturally with native taxa?                                                                                                                  | No  | No such evidence exists                                                                                            | Very high |
| 31                              | 6.04 | Is the taxon likely to be hermaphroditic or to display asexual reproduction?                                                                                                  | No  | The species is sexually reproducing                                                                                | Very high |
| 32                              | 6.05 | Is the taxon dependent on the presence of another taxon (or specific habitat features) to complete its life cycle?                                                            | No  | Not depends to any other taxon to complete its life cycle                                                          | Very high |
| 33                              | 6.06 | Is the taxon known (or likely) to produce a large number of propagules or offspring within a short time span (e.g. < 1 year)?                                                 | Yes | Usually producing large number of eggs once reaching adult size                                                    | Very high |
| 34                              | 6.07 | How many time units (days, months, years) does the taxon require to reach the age-at-first-reproduction?                                                                      | 3   | Kottelat M, Freyhof J. 2007. Handbook of European Freshwater Fishes. Kottelat, Cornol and Freyhof. Berlin, p. 646. | High      |
| <b>7. Dispersal mechanisms</b>  |      |                                                                                                                                                                               |     |                                                                                                                    |           |
| 35                              | 7.01 | How many potential internal vectors/pathways could the taxon use to disperse within the RA area (with suitable)?                                                              | One | It can be dispersed with an active translocation by a human                                                        | High      |
| 36                              | 7.02 | Will any of these vectors/pathways bring the taxon in close proximity to one or more protected areas (e.g. MCZ, MPA, SSSI)?                                                   | Yes | Yes, the species is introduced in Javakheti protected areas                                                        | Medium    |
| 37                              | 7.03 | Does the taxon have a means of actively attaching itself to hard substrata (e.g. ship hulls, pilings, buoys) such that it enhances the likelihood of dispersal?               | No  | No such an evidence exists                                                                                         | Very high |
| 38                              | 7.04 | Is natural dispersal of the taxon likely to occur as eggs (for animals) or as propagules (for plants: seeds, spores) in the RA area?                                          | No  | No documented evidence exists                                                                                      | High      |
| 39                              | 7.05 | Is natural dispersal of the taxon likely to occur as larvae/juveniles (for animals) or as fragments/seedlings (for plants) in the RA area?                                    | Yes | No documented evidence exists                                                                                      | Low       |
| 40                              | 7.06 | Are older life stages of the taxon likely to migrate in the RA area for reproduction?                                                                                         | No  | Not a migrant species                                                                                              | Very high |
| 41                              | 7.07 | Are propagules or eggs of the taxon likely to be dispersed in the RA area by other animals?                                                                                   | No  | No such an evidence exists                                                                                         | Very high |
| 42                              | 7.08 | Is dispersal of the taxon along any of the vectors/pathways mentioned in the previous seven questions (35–41; i.e. both unintentional or intentional) likely to be?           | Yes | Large amount of fry are usually released periodically                                                              | Very high |
| 43                              | 7.09 | Is dispersal of the taxon density dependent?                                                                                                                                  | No  | No documented evidence exists                                                                                      | Low       |
| <b>8. Tolerance attributes</b>  |      |                                                                                                                                                                               |     |                                                                                                                    |           |
| 44                              | 8.01 | Is the taxon able to withstand being out of water for extended periods (e.g. minimum of one or more hours) at some stage of its life cycle?                                   | No  | No such an evidence exists                                                                                         | High      |
| 45                              | 8.02 | Is the taxon tolerant of a wide range of water quality conditions relevant to that taxon? [In the Justification field, indicate the relevant water quality variable(s) being] | No  | No documented evidence exists                                                                                      | Medium    |
| 46                              | 8.03 | Can the taxon be controlled or eradicated in the wild with chemical, biological, or other agents/means?                                                                       | No  | No such a practice exists                                                                                          | High      |
| 47                              | 8.04 | Is the taxon likely to tolerate or benefit from environmental/human disturbance?                                                                                              | No  | Not expected based on professional judgment                                                                        | Medium    |
| 48                              | 8.05 | Is the taxon able to tolerate salinity levels that are higher or lower than those found in its usual environment?                                                             | No  | No documented evidence exists                                                                                      | Medium    |
| 49                              | 8.06 | Are there effective natural enemies (predators) of the taxon present in the RA                                                                                                | No  | No an effective enemies have been observed in the RA area                                                          | High      |

| C. Climate change |      |                                                                                                                                                              |           |                                           |        |
|-------------------|------|--------------------------------------------------------------------------------------------------------------------------------------------------------------|-----------|-------------------------------------------|--------|
| 9. Climate change |      |                                                                                                                                                              |           |                                           |        |
| 50                | 9.01 | Under the predicted future climatic conditions, are the risks of entry into the RA area posed by the taxon likely to increase, decrease or not change?       | No change | Not expected based on personal experience | High   |
| 51                | 9.02 | Under the predicted future climatic conditions, are the risks of establishment posed by the taxon likely to increase, decrease or not change?                | Decrease  | Based on professional judgment            | Low    |
| 52                | 9.03 | Under the predicted future climatic conditions, are the risks of dispersal within the RA area posed by the taxon likely to increase, decrease or not change? | No change | Based on professional judgment            | High   |
| 53                | 9.04 | Under the predicted future climatic conditions, what is the likely magnitude of future potential impacts on biodiversity and/or ecological integrity/status? | Lower     | Based on professional judgment            | Medium |
| 54                | 9.05 | Under the predicted future climatic conditions, what is the likely magnitude of future potential impacts on ecosystem structure and/or function?             | Lower     | Based on professional judgment            | Low    |
| 55                | 9.06 | Under the predicted future climatic conditions, what is the likely magnitude of future potential impacts on ecosystem services/socio-economic factors?       | Lower     | Based on professional judgment            | Low    |

| Statistics                                     |      |
|------------------------------------------------|------|
| Scores                                         |      |
| BRA                                            | 8.0  |
| BRA Outcome                                    | -    |
| BRA+CCA                                        | 0.0  |
| BRA+CCA Outcome                                | -    |
| Score partition                                |      |
| A. Biogeography/Historical                     | 6.0  |
| 1. Domestication/Cultivation                   | 4.0  |
| 2. Climate, distribution and introduction risk | 0.0  |
| 3. Invasive elsewhere                          | 2.0  |
| B. Biology/Ecology                             | 2.0  |
| 4. Undesirable (or persistence) traits         | 2.0  |
| 5. Resource exploitation                       | 2.0  |
| 6. Reproduction                                | 1.0  |
| 7. Dispersal mechanisms                        | -1.0 |
| 8. Tolerance attributes                        | -2.0 |
| C. Climate change                              | -8.0 |
| 9. Climate change                              | -8.0 |
| Answered Questions                             |      |
| Total                                          | 55   |
| A. Biogeography/Historical                     | 13   |
| 1. Domestication/Cultivation                   | 3    |
| 2. Climate, distribution and introduction risk | 5    |
| 3. Invasive elsewhere                          | 5    |
| B. Biology/Ecology                             | 36   |
| 4. Undesirable (or persistence) traits         | 12   |
| 5. Resource exploitation                       | 2    |
| 6. Reproduction                                | 7    |
| 7. Dispersal mechanisms                        | 9    |
| 8. Tolerance attributes                        | 6    |
| C. Climate change                              | 6    |
| 9. Climate change                              | 6    |
| Sectors affected                               |      |
| Commercial                                     | 2    |
| Environmental                                  | -2   |
| Species or population nuisance traits          | 2    |

| Thresholds |      |
|------------|------|
| BRA        | -    |
| BRA+CCA    | -    |
| Confidence |      |
| BRA+CCA    | 0.63 |
| BRA        | 0.65 |
| CCA        | 0.46 |

| Date and Time       |
|---------------------|
| 14/05/2022 12:51:24 |

## AS-ISK v2

| Taxon and Assessor details         |                                                                                                                                 |
|------------------------------------|---------------------------------------------------------------------------------------------------------------------------------|
| Category                           | Fishes and Lampreys (freshwater)                                                                                                |
| Taxon name                         | <i>Coregonus sp.</i>                                                                                                            |
| Common name                        | -                                                                                                                               |
| Assessor                           | Giorgi Epitashvili                                                                                                              |
| Risk screening context             |                                                                                                                                 |
| Reason and socio-economic benefits | C. lavaretus is important fish for trade. It has been stocked in waters of Europe, where it isn't                               |
| Risk assessment area               | South Caucasus                                                                                                                  |
| Taxonomy                           | Coregonus lavaretus (Linnaeus 1758)                                                                                             |
| Native range                       | Europe: Native to Lake Bourget (France) and Geneva (Switzerland, France). Population of Lake                                    |
| Introduced range                   | Has been stocked into many other places in Europe outside its native range. Introduced to Iran,                                 |
| URL                                | <a href="https://www.fishbase.se/summary/Coregonus-lavaretus.html">https://www.fishbase.se/summary/Coregonus-lavaretus.html</a> |

|                                                |      | Response                                                                                                                                                                | Justification (references and/or other information) | Confidence                                                                                                                                                                                                                                                                                                                                                                                                                        |           |
|------------------------------------------------|------|-------------------------------------------------------------------------------------------------------------------------------------------------------------------------|-----------------------------------------------------|-----------------------------------------------------------------------------------------------------------------------------------------------------------------------------------------------------------------------------------------------------------------------------------------------------------------------------------------------------------------------------------------------------------------------------------|-----------|
| A. Biogeography/Historical                     |      |                                                                                                                                                                         |                                                     |                                                                                                                                                                                                                                                                                                                                                                                                                                   |           |
| 1. Domestication/Cultivation                   |      |                                                                                                                                                                         |                                                     |                                                                                                                                                                                                                                                                                                                                                                                                                                   |           |
| 1                                              | 1.01 | Has the taxon been the subject of domestication (or cultivation) for at least 20 generations?                                                                           | Yes                                                 | This species has been stocked into many places in Europe outside its native range for aquacultural purposes.                                                                                                                                                                                                                                                                                                                      | Very high |
| 2                                              | 1.02 | Is the taxon harvested in the wild and likely to be sold or used in its live form?                                                                                      | Yes                                                 | In recent years in Lake Sevan, Armenia, the declining of whitefish is caused by high value of fishing pressure.                                                                                                                                                                                                                                                                                                                   | Very high |
| 3                                              | 1.03 | Does the taxon have invasive races, varieties, sub-taxa or congeners?                                                                                                   | Yes                                                 | Population biology changes in native dimorphic whitefish Coregonus lavaretus were studied over a decade in the subarctic Pasvik watercourse, where large biotric changes occurred due to an invasion by vendace C. albula. Although initially recorded in the upstream part of the watercourse, where it is now the dominant pelagic species, the vendace subsequently also colonised the downstream area (Bohn & Amundsen 2004). | High      |
| 2. Climate, distribution and introduction risk |      |                                                                                                                                                                         |                                                     |                                                                                                                                                                                                                                                                                                                                                                                                                                   |           |
| 4                                              | 2.01 | How similar are the climatic conditions of the Risk Assessment (RA) area and the taxon's native range?                                                                  | High                                                | Koppen - Geiger climate classification                                                                                                                                                                                                                                                                                                                                                                                            | Medium    |
| 5                                              | 2.02 | What is the quality of the climate matching data?                                                                                                                       | Medium                                              | Koppen - Geiger climate classification                                                                                                                                                                                                                                                                                                                                                                                            | Medium    |
| 6                                              | 2.03 | Is the taxon already present outside of captivity in the RA area?                                                                                                       | Yes                                                 | This species is distributed in the SC region since 1920ies (Ninua et al. 2013; Kuljanishvili et al. 2020).                                                                                                                                                                                                                                                                                                                        | Very high |
| 7                                              | 2.04 | How many potential vectors could the taxon use to enter in the RA area?                                                                                                 | One                                                 | This species already inhabits the region. It was introduced by human for aquacultural purposes                                                                                                                                                                                                                                                                                                                                    | High      |
| 8                                              | 2.05 | Is the taxon currently found in close proximity to, and likely to enter into, the RA area in the near future (e.g. unintentional and intentional introductions)?        | Yes                                                 | C. lavaretus was introduced in Iran (Coad, 1998).                                                                                                                                                                                                                                                                                                                                                                                 | Very high |
| 3. Invasive elsewhere                          |      |                                                                                                                                                                         |                                                     |                                                                                                                                                                                                                                                                                                                                                                                                                                   |           |
| 9                                              | 3.01 | Has the taxon become naturalised (established viable populations) outside its                                                                                           | Yes                                                 | Naturalised populations of C. lavaretus is occurring in the lakes of Armenia and Georgia (Ninua et al. 2013; Kuljanishvili et al. 2020)                                                                                                                                                                                                                                                                                           | Very high |
| 10                                             | 3.02 | In the taxon's introduced range, are there known adverse impacts to wild stocks or commercial taxa?                                                                     | No                                                  | No such fact has been revealed                                                                                                                                                                                                                                                                                                                                                                                                    | High      |
| 11                                             | 3.03 | In the taxon's introduced range, are there known adverse impacts to aquaculture?                                                                                        | No                                                  | No such fact has been revealed                                                                                                                                                                                                                                                                                                                                                                                                    | High      |
| 12                                             | 3.04 | In the taxon's introduced range, are there known adverse impacts to ecosystem                                                                                           | No                                                  | No such fact has been revealed                                                                                                                                                                                                                                                                                                                                                                                                    | High      |
| 13                                             | 3.05 | In the taxon's introduced range, are there known adverse socio-economic impacts?                                                                                        | No                                                  | No such fact has been revealed                                                                                                                                                                                                                                                                                                                                                                                                    | High      |
| B. Biology/Ecology                             |      |                                                                                                                                                                         |                                                     |                                                                                                                                                                                                                                                                                                                                                                                                                                   |           |
| 4. Undesirable (or persistence) traits         |      |                                                                                                                                                                         |                                                     |                                                                                                                                                                                                                                                                                                                                                                                                                                   |           |
| 14                                             | 4.01 | Is it likely that the taxon will be poisonous or pose other risks to human health?                                                                                      | No                                                  | This species does not pose a threat to humans.                                                                                                                                                                                                                                                                                                                                                                                    | Very high |
| 15                                             | 4.02 | Is it likely that the taxon will smother one or more native taxa (that are not threatened or protected)?                                                                | Yes                                                 | This fish is a predator but no such fact has been revealed in the Caucasus region                                                                                                                                                                                                                                                                                                                                                 | Low       |
| 16                                             | 4.03 | Are there any threatened or protected taxa that the non-native taxon would parasitise in the RA area?                                                                   | Yes                                                 | This fish is a predator but no such fact has been revealed in the Caucasus region                                                                                                                                                                                                                                                                                                                                                 | Low       |
| 17                                             | 4.04 | Is the taxon adaptable in terms of climatic and other environmental conditions, thus enhancing its potential persistence if it has invaded or could invade the RA area? | Yes                                                 | This species has inhabites the region for about 100 years                                                                                                                                                                                                                                                                                                                                                                         | Very high |
| 18                                             | 4.05 | Is the taxon likely to disrupt food-web structure/function in aquatic ecosystems if it has invaded or is likely to invade the RA                                        | No                                                  | Such a fact is not expected because the population is small                                                                                                                                                                                                                                                                                                                                                                       | High      |
| 19                                             | 4.06 | Is the taxon likely to exert adverse impacts on ecosystem services in the RA area?                                                                                      | No                                                  | This species will not affect ecosystem service in the SC region                                                                                                                                                                                                                                                                                                                                                                   | Very high |
| 20                                             | 4.07 | Is it likely that the taxon will host, and/or act as a vector for, recognised pests and infectious agents that are endemic in the RA                                    | Not applicable                                      | Such data is not available                                                                                                                                                                                                                                                                                                                                                                                                        | Low       |
| 21                                             | 4.08 | Is it likely that the taxon will host, and/or act as a vector for, recognised pests and infectious agents that are absent from (novel to) the RA area?                  | No                                                  | Such data is not available                                                                                                                                                                                                                                                                                                                                                                                                        | Low       |
| 22                                             | 4.09 | Is it likely that the taxon will achieve a body size that will make it more likely to be released from captivity?                                                       | Yes                                                 | This species is common subject for fishery and aquaculture. Max length: 73.0 cm; max. published weight: 10.0 kg                                                                                                                                                                                                                                                                                                                   | Very high |

|                                 |      |                                                                                                                                                                              |                |                                                                                                                                                                                                                                                                               |           |
|---------------------------------|------|------------------------------------------------------------------------------------------------------------------------------------------------------------------------------|----------------|-------------------------------------------------------------------------------------------------------------------------------------------------------------------------------------------------------------------------------------------------------------------------------|-----------|
| 23                              | 4.10 | Is the taxon capable of sustaining itself in a range of water velocity conditions (e.g. versatile in habitat use)?                                                           | No             | This species has lacustrine forms and anadromous estuarine forms, rarely in full saltwater.                                                                                                                                                                                   | High      |
| 24                              | 4.11 | Is it likely that the taxon's mode of existence (e.g. excretion of by-products) or behaviours (e.g. feeding) will reduce habitat quality for native taxa?                    | No             | No such fact has been detected                                                                                                                                                                                                                                                | High      |
| 25                              | 4.12 | Is the taxon likely to maintain a viable population even when present in low densities (or persisting in adverse conditions by way of a dormant form)?                       | No             | Data deficient                                                                                                                                                                                                                                                                | Medium    |
| <b>5. Resource exploitation</b> |      |                                                                                                                                                                              |                |                                                                                                                                                                                                                                                                               |           |
| 26                              | 5.01 | Is the taxon likely to consume threatened or protected native taxa in the RA area?                                                                                           | Yes            | This species is a predator and can consume threatened or protected species, for instance <i>Salmo ischchan/geqarkuni</i>                                                                                                                                                      | Medium    |
| 27                              | 5.02 | Is the taxon likely to sequester food resources (including nutrients) to the detriment of native taxa in the RA area?                                                        | Yes            | This fish is a predator and might be a competitor for local species                                                                                                                                                                                                           | Medium    |
| <b>6. Reproduction</b>          |      |                                                                                                                                                                              |                |                                                                                                                                                                                                                                                                               |           |
| 28                              | 6.01 | Is the taxon likely to exhibit parental care and/or to reduce age-at-maturity in response to environmental conditions?                                                       | Not applicable | Data deficient                                                                                                                                                                                                                                                                | Low       |
| 29                              | 6.02 | Is the taxon likely to produce viable gametes or propagules (in the RA area)?                                                                                                | Yes            | This species is naturally reproduces in the region (Rubenian, 1997).                                                                                                                                                                                                          | Very high |
| 30                              | 6.03 | Is the taxon likely to hybridise naturally with native taxa?                                                                                                                 | No             | Hybridization in the genus <i>Coregonus</i> is a common occurrence. There are facts that resident <i>C. lavaretus</i> was hybridised with <i>C. albula</i> or <i>C. peled</i> , but the fact that the transported whitefish were hybridized to native species does not exist. | Medium    |
| 31                              | 6.04 | Is the taxon likely to be hermaphroditic or to display asexual reproduction?                                                                                                 | Yes            | A single hermaphrodite specimen of <i>Coregonus lavaretus</i> was caught mid-January in Loch Lomond, Scotland (Scott 1975).                                                                                                                                                   | High      |
| 32                              | 6.05 | Is the taxon dependent on the presence of another taxon (or specific habitat features) to complete its life cycle?                                                           | No             | No such fact has been described                                                                                                                                                                                                                                               | High      |
| 33                              | 6.06 | Is the taxon known (or likely) to produce a large number of propagules or offspring within a short time span (e.g. < 1 year)?                                                | Yes            | Fecundity of <i>C. lavaretus</i> is up to 54 000 eggs (Ninua et al. 2013).                                                                                                                                                                                                    | Medium    |
| 34                              | 6.07 | How many time units (days, months, years) does the taxon require to reach the age-at-first-reproduction?                                                                     | 2              | The males were sexually mature at the age of 1+, while most females were mature at the age of 2+. (Szczepkowski et al. 2010).                                                                                                                                                 | High      |
| <b>7. Dispersal mechanisms</b>  |      |                                                                                                                                                                              |                |                                                                                                                                                                                                                                                                               |           |
| 35                              | 7.01 | How many potential internal vectors/pathways could the taxon use to disperse within the RA area (with suitable vectors)?                                                     | One            | This species may spread in the region by artificially from hatchery                                                                                                                                                                                                           | High      |
| 36                              | 7.02 | Will any of these vectors/pathways bring the taxon in close proximity to one or more protected areas (e.g. MCZ, MPA, SSSI)?                                                  | Yes            | <i>C. lavaretus</i> is already inhabited in the Lake Tabatskuri, Georgia, which is protected area.                                                                                                                                                                            | High      |
| 37                              | 7.03 | Does the taxon have a means of actively attaching itself to hard substrata (e.g. ship hulls, pilings, buoys) such that it enhances the likelihood of dispersal?              | No             | Own judgement                                                                                                                                                                                                                                                                 | High      |
| 38                              | 7.04 | Is natural dispersal of the taxon likely to occur as eggs (for animals) or as propagules (for plants: seeds, spores) in the RA area?                                         | No             | No such fact has been detected                                                                                                                                                                                                                                                | High      |
| 39                              | 7.05 | Is natural dispersal of the taxon likely to occur as larvae/juveniles (for animals) or as fragments/seedlings (for plants) in the RA area?                                   | No             | No such fact has been detected                                                                                                                                                                                                                                                | High      |
| 40                              | 7.06 | Are older life stages of the taxon likely to migrate in the RA area for reproduction?                                                                                        | No             | No such behavior has been detected                                                                                                                                                                                                                                            | High      |
| 41                              | 7.07 | Are propagules or eggs of the taxon likely to be dispersed in the RA area by other animals?                                                                                  | No             | No such fact has been detected                                                                                                                                                                                                                                                | High      |
| 42                              | 7.08 | Is dispersal of the taxon along any of the vectors/pathways mentioned in the previous seven questions (35–41; i.e. both unintentional or intentional) likely to be           | Not applicable | Data deficient                                                                                                                                                                                                                                                                | Low       |
| 43                              | 7.09 | Is dispersal of the taxon density dependent?                                                                                                                                 | Not applicable | Data deficient                                                                                                                                                                                                                                                                | Low       |
| <b>8. Tolerance attributes</b>  |      |                                                                                                                                                                              |                |                                                                                                                                                                                                                                                                               |           |
| 44                              | 8.01 | Is the taxon able to withstand being out of water for extended periods (e.g. minimum of one or more hours) at some stage of its life cycle?                                  | No             | Own judgement                                                                                                                                                                                                                                                                 | High      |
| 45                              | 8.02 | Is the taxon tolerant of a wide range of water quality conditions relevant to that taxon? [In the Justification field, indicate the relevant water quality variable(s) being | No             | This species inhabit lakes, enter rivers, prefer sandy-stony cold water which is rich in oxygen (Ninua et al. 2013)                                                                                                                                                           | High      |
| 46                              | 8.03 | Can the taxon be controlled or eradicated in the wild with chemical, biological, or other agents/means?                                                                      | Yes            | There is no need for this as this species is not considered harmful                                                                                                                                                                                                           | Medium    |
| 47                              | 8.04 | Is the taxon likely to tolerate or benefit from environmental/human disturbance?                                                                                             | Yes            | This species was spread by humans in regions where it was not inhabited.                                                                                                                                                                                                      | Medium    |
| 48                              | 8.05 | Is the taxon able to tolerate salinity levels that are higher or lower than those found in its usual environment?                                                            | Yes            | <i>C. lavaretus</i> has lacustrine and anadromous estuarine forms, rarely in full saltwater forms.                                                                                                                                                                            | High      |
| 49                              | 8.06 | Are there effective natural enemies (predators) of the taxon present in the RA                                                                                               | Yes            | There are several predators in the Caucasus region which can controll the <i>C. lavaretus</i> population: <i>Salmo</i> spp, <i>Squalius</i> spp,                                                                                                                              | High      |
| <b>C. Climate change</b>        |      |                                                                                                                                                                              |                |                                                                                                                                                                                                                                                                               |           |



| 9. Climate change |      |                                                                                                                                                              |          |                                                                                                                                                                                 |        |
|-------------------|------|--------------------------------------------------------------------------------------------------------------------------------------------------------------|----------|---------------------------------------------------------------------------------------------------------------------------------------------------------------------------------|--------|
| 50                | 9.01 | Under the predicted future climatic conditions, are the risks of entry into the RA area posed by the taxon likely to increase, decrease or not change?       | Decrease | Such risks are likely to be reduced as climate change adversely affects the alpine lakes (Sevan, Paravani, Tabatskuri, etc) in the region where the species currently inhabits. | Medium |
| 51                | 9.02 | Under the predicted future climatic conditions, are the risks of establishment posed by the taxon likely to increase, decrease or not change?                | Decrease | Such risks are likely to be reduced as climate change adversely affects the alpine lakes (Sevan, Paravani, Tabatskuri, etc) in the region where the species currently inhabits. | Medium |
| 52                | 9.03 | Under the predicted future climatic conditions, are the risks of dispersal within the RA area posed by the taxon likely to increase, decrease or not change? | Decrease | Such risks are likely to be reduced as climate change adversely affects the alpine lakes (Sevan, Paravani, Tabatskuri, etc) in the region where the species currently inhabits. | Medium |
| 53                | 9.04 | Under the predicted future climatic conditions, what is the likely magnitude of future potential impacts on biodiversity and/or ecological integrity/status? | Lower    | Own judgement                                                                                                                                                                   | High   |
| 54                | 9.05 | Under the predicted future climatic conditions, what is the likely magnitude of future potential impacts on ecosystem structure and/or function?             | Lower    | Own judgement                                                                                                                                                                   | High   |
| 55                | 9.06 | Under the predicted future climatic conditions, what is the likely magnitude of future potential impacts on ecosystem services/socio-economic factors?       | Lower    | Own judgement                                                                                                                                                                   | High   |

| Statistics                                     |       |
|------------------------------------------------|-------|
| Scores                                         |       |
| BRA                                            | 18.0  |
| BRA Outcome                                    | -     |
| BRA+CCA                                        | 6.0   |
| BRA+CCA Outcome                                | -     |
| Score partition                                |       |
| A. Biogeography/Historical                     | 7.0   |
| 1. Domestication/Cultivation                   | 4.0   |
| 2. Climate, distribution and introduction risk | 1.0   |
| 3. Invasive elsewhere                          | 2.0   |
| B. Biology/Ecology                             | 11.0  |
| 4. Undesirable (or persistence) traits         | 4.0   |
| 5. Resource exploitation                       | 7.0   |
| 6. Reproduction                                | 3.0   |
| 7. Dispersal mechanisms                        | -4.0  |
| 8. Tolerance attributes                        | 1.0   |
| C. Climate change                              | -12.0 |
| 9. Climate change                              | -12.0 |
| Answered Questions                             |       |
| Total                                          | 55    |
| A. Biogeography/Historical                     | 13    |
| 1. Domestication/Cultivation                   | 3     |
| 2. Climate, distribution and introduction risk | 5     |
| 3. Invasive elsewhere                          | 5     |
| B. Biology/Ecology                             | 36    |
| 4. Undesirable (or persistence) traits         | 12    |
| 5. Resource exploitation                       | 2     |
| 6. Reproduction                                | 7     |
| 7. Dispersal mechanisms                        | 9     |
| 8. Tolerance attributes                        | 6     |
| C. Climate change                              | 6     |
| 9. Climate change                              | 6     |
| Sectors affected                               |       |
| Commercial                                     | 2     |
| Environmental                                  | 2     |
| Species or population nuisance traits          | 4     |

| Thresholds |      |
|------------|------|
| BRA        | -    |
| BRA+CCA    | -    |
| Confidence |      |
| BRA+CCA    | 0.68 |
| BRA        | 0.68 |
| CCA        | 0.63 |

| Date and Time       |  |
|---------------------|--|
| 03/05/2022 16:24:37 |  |

## AS-ISK v2

| Taxon and Assessor details         |                                                                                         |
|------------------------------------|-----------------------------------------------------------------------------------------|
| Category                           | Fishes and Lampreys (freshwater)                                                        |
| Taxon name                         | <i>Coregonus sp.</i>                                                                    |
| Common name                        | -                                                                                       |
| Assessor                           | Tatia Kuljanishvili                                                                     |
| Risk screening context             |                                                                                         |
| Reason and socio-economic benefits | Following the recommendations of Prof. Derzhavin, commercially valuable species such as |
| Risk assessment area               | South Caucasus                                                                          |
| Taxonomy                           | Actinopteri (ray-finned fishes) > Salmoniformes (Salmons) > Salmonidae (Salmonids) >    |
| Native range                       | Russian Lakes                                                                           |
| Introduced range                   | South Caucasian Lakes                                                                   |
| URL                                |                                                                                         |

|                                                |      | Response                                                                                                                                                                | Justification (references and/or other information) | Confidence                                                                                                                                                                                                                                                                                                                                                                                                                                                                                                                                                                                                                                                                                                                                                                                              |           |
|------------------------------------------------|------|-------------------------------------------------------------------------------------------------------------------------------------------------------------------------|-----------------------------------------------------|---------------------------------------------------------------------------------------------------------------------------------------------------------------------------------------------------------------------------------------------------------------------------------------------------------------------------------------------------------------------------------------------------------------------------------------------------------------------------------------------------------------------------------------------------------------------------------------------------------------------------------------------------------------------------------------------------------------------------------------------------------------------------------------------------------|-----------|
| A. Biogeography/Historical                     |      |                                                                                                                                                                         |                                                     |                                                                                                                                                                                                                                                                                                                                                                                                                                                                                                                                                                                                                                                                                                                                                                                                         |           |
| 1. Domestication/Cultivation                   |      |                                                                                                                                                                         |                                                     |                                                                                                                                                                                                                                                                                                                                                                                                                                                                                                                                                                                                                                                                                                                                                                                                         |           |
| 1                                              | 1.01 | Has the taxon been the subject of domestication (or cultivation) for at least 20 generations?                                                                           | Yes                                                 | Following the recommendations of Prof. Derzhavin, commercially valuable species such as <i>Coregonus</i> sp. and <i>C. ludoga</i> from Ladoga Lake, and <i>C. maraenoides</i> from Chudskoe Lake were introduced to Sevan Lake in Armenia from 1924-1927, to support fish production (Barach, 1940; Dadikyan, 1964). During these three years, these coregonids were transported in the form of fertilized eggs from the Volkhov Hatchery in Russia, and already in 1927, fish farms around the lake could reproduce whitefishes and release them in the lake (Dadikyan, 1964). According to Elanidze (1983) in 1930, <i>C. ludoga</i> was introduced from the Volkhov hatchery at Ladoga Lake to Tabatskuri Lake in Georgia. <del>For some reason, however, the species was not recorded for the</del> | Very high |
| 2                                              | 1.02 | Is the taxon harvested in the wild and likely to be sold or used in its live form?                                                                                      | Yes                                                 | Since the species is the commercially valuable, it is being harvested from the wild, and it can also be sold in its live form, for commercial purposes.                                                                                                                                                                                                                                                                                                                                                                                                                                                                                                                                                                                                                                                 | Very high |
| 3                                              | 1.03 | Does the taxon have invasive races, varieties, sub-taxa or congeners?                                                                                                   | Yes                                                 | Not known                                                                                                                                                                                                                                                                                                                                                                                                                                                                                                                                                                                                                                                                                                                                                                                               | High      |
| 2. Climate, distribution and introduction risk |      |                                                                                                                                                                         |                                                     |                                                                                                                                                                                                                                                                                                                                                                                                                                                                                                                                                                                                                                                                                                                                                                                                         |           |
| 4                                              | 2.01 | How similar are the climatic conditions of the Risk Assessment (RA) area and the taxon's native range?                                                                  | Medium                                              | it is similar in high altitude areas. But in lowlands it is not.                                                                                                                                                                                                                                                                                                                                                                                                                                                                                                                                                                                                                                                                                                                                        | Very high |
| 5                                              | 2.02 | What is the quality of the climate matching data?                                                                                                                       | High                                                | out of 10 stations, 5 stations in mountainous areas have matched                                                                                                                                                                                                                                                                                                                                                                                                                                                                                                                                                                                                                                                                                                                                        | Very high |
| 6                                              | 2.03 | Is the taxon already present outside of captivity in the RA area?                                                                                                       | Yes                                                 | Occurs in Lake Sevan (Kuljanishvili et al 2020)                                                                                                                                                                                                                                                                                                                                                                                                                                                                                                                                                                                                                                                                                                                                                         | Very high |
| 7                                              | 2.04 | How many potential vectors could the taxon use to enter in the RA area?                                                                                                 | One                                                 | Aquaculture                                                                                                                                                                                                                                                                                                                                                                                                                                                                                                                                                                                                                                                                                                                                                                                             | Very high |
| 8                                              | 2.05 | Is the taxon currently found in close proximity to, and likely to enter into, the RA area in the near future (e.g. unintentional and intentional introductions)?        | Yes                                                 | Occurs in Lake Sevan (Kuljanishvili et al 2020)                                                                                                                                                                                                                                                                                                                                                                                                                                                                                                                                                                                                                                                                                                                                                         | High      |
| 3. Invasive elsewhere                          |      |                                                                                                                                                                         |                                                     |                                                                                                                                                                                                                                                                                                                                                                                                                                                                                                                                                                                                                                                                                                                                                                                                         |           |
| 9                                              | 3.01 | Has the taxon become naturalised (established viable populations) outside its native range?                                                                             | Yes                                                 | Following the recommendations of Prof. Derzhavin, commercially valuable species such as <i>Coregonus</i> sp. and <i>C. ludoga</i> from Ladoga Lake, and <i>C. maraenoides</i> from Chudskoe Lake were introduced to Sevan Lake in Armenia from 1924-1927, to support fish production (Barach, 1940; Dadikyan, 1964). During these three years, these coregonids were transported in the form of fertilized eggs from the Volkhov Hatchery in Russia, and already in 1927, fish farms around the lake could reproduce whitefishes and release them in the lake (Dadikyan, 1964). Later on these species were interbred (Mailyan, 1957) and a hybrid form arose as a new subspecies <i>C. lavaretus sevanicus</i> (Dadikyan, 1986).                                                                       | High      |
| 10                                             | 3.02 | In the taxon's introduced range, are there known adverse impacts to wild stocks or commercial taxa?                                                                     | No                                                  | Not known                                                                                                                                                                                                                                                                                                                                                                                                                                                                                                                                                                                                                                                                                                                                                                                               | Very high |
| 11                                             | 3.03 | In the taxon's introduced range, are there known adverse impacts to aquaculture?                                                                                        | No                                                  | No adverse impact on aquaculture                                                                                                                                                                                                                                                                                                                                                                                                                                                                                                                                                                                                                                                                                                                                                                        | High      |
| 12                                             | 3.04 | In the taxon's introduced range, are there known adverse impacts to ecosystem                                                                                           | No                                                  | NO adverse impacts on ecosystem services, however can be transmitting diseases and parasites                                                                                                                                                                                                                                                                                                                                                                                                                                                                                                                                                                                                                                                                                                            | Low       |
| 13                                             | 3.05 | In the taxon's introduced range, are there known adverse socio-economic impacts?                                                                                        | No                                                  | No socio-economic impacts                                                                                                                                                                                                                                                                                                                                                                                                                                                                                                                                                                                                                                                                                                                                                                               | High      |
| B. Biology/Ecology                             |      |                                                                                                                                                                         |                                                     |                                                                                                                                                                                                                                                                                                                                                                                                                                                                                                                                                                                                                                                                                                                                                                                                         |           |
| 4. Undesirable (or persistence) traits         |      |                                                                                                                                                                         |                                                     |                                                                                                                                                                                                                                                                                                                                                                                                                                                                                                                                                                                                                                                                                                                                                                                                         |           |
| 14                                             | 4.01 | Is it likely that the taxon will be poisonous or pose other risks to human health?                                                                                      | No                                                  | Harmless.                                                                                                                                                                                                                                                                                                                                                                                                                                                                                                                                                                                                                                                                                                                                                                                               | Very high |
| 15                                             | 4.02 | Is it likely that the taxon will smother one or more native taxa (that are not threatened or protected)?                                                                | Yes                                                 | Impact of introduced witefish on native taxa can only be alteration of native food webs (Savini et al 2010).                                                                                                                                                                                                                                                                                                                                                                                                                                                                                                                                                                                                                                                                                            | Low       |
| 16                                             | 4.03 | Are there any threatened or protected taxa that the non-native taxon would parasitise in the RA area?                                                                   | No                                                  | No. does not parasite                                                                                                                                                                                                                                                                                                                                                                                                                                                                                                                                                                                                                                                                                                                                                                                   | Very high |
| 17                                             | 4.04 | Is the taxon adaptable in terms of climatic and other environmental conditions, thus enhancing its potential persistence if it has invaded or could invade the RA area? | No                                                  | Coregonids are Coldwater fishes and they require cold environment. they can not adapt variable climatic environments.                                                                                                                                                                                                                                                                                                                                                                                                                                                                                                                                                                                                                                                                                   | Very high |

|                                 |      |                                                                                                                                                                    |     |                                                                                                                                                           |           |
|---------------------------------|------|--------------------------------------------------------------------------------------------------------------------------------------------------------------------|-----|-----------------------------------------------------------------------------------------------------------------------------------------------------------|-----------|
| 18                              | 4.05 | Is the taxon likely to disrupt food-web structure/function in aquatic ecosystems if it has invaded or is likely to invade the RA                                   | Yes | May alter the food webs by selective praying on zooplankton                                                                                               | Low       |
| 19                              | 4.06 | Is the taxon likely to exert adverse impacts on ecosystem services in the RA area?                                                                                 | No  | No information available                                                                                                                                  | High      |
| 20                              | 4.07 | Is it likely that the taxon will host, and/or act as a vector for, recognised pests and infectious agents that are endemic in the RA                               | No  | No information available                                                                                                                                  | Low       |
| 21                              | 4.08 | Is it likely that the taxon will host, and/or act as a vector for, recognised pests and infectious agents that are absent from (novel to) the RA area?             | Yes | It is possible.                                                                                                                                           | Low       |
| 22                              | 4.09 | Is it likely that the taxon will achieve a body size that will make it more likely to be released from captivity?                                                  | Yes | It is usually released in the wild since small fry.                                                                                                       | Medium    |
| 23                              | 4.10 | Is the taxon capable of sustaining itself in a range of water velocity conditions (e.g. versatile in habitat use)?                                                 | No  | This is a lacustrine species.                                                                                                                             | High      |
| 24                              | 4.11 | Is it likely that the taxon's mode of existence (e.g. excretion of by-products) or behaviours (e.g. feeding) will reduce habitat quality for native taxa?          | No  | No. Not documented                                                                                                                                        | High      |
| 25                              | 4.12 | Is the taxon likely to maintain a viable population even when present in low densities (or persisting in adverse conditions by way of a dormant form)?             | No  | It usually spawns for the first time at the age of 3-6 years old. in case of overfishing it might not be able to have viable population in low densities. | Medium    |
| <b>5. Resource exploitation</b> |      |                                                                                                                                                                    |     |                                                                                                                                                           |           |
| 26                              | 5.01 | Is the taxon likely to consume threatened or protected native taxa in the RA area?                                                                                 | No  | Not a predator, eats plankton only.                                                                                                                       | High      |
| 27                              | 5.02 | Is the taxon likely to sequester food resources (including nutrients) to the detriment of native taxa in the RA area?                                              | No  | It is unlikely                                                                                                                                            | High      |
| <b>6. Reproduction</b>          |      |                                                                                                                                                                    |     |                                                                                                                                                           |           |
| 28                              | 6.01 | Is the taxon likely to exhibit parental care and/or to reduce age-at-maturity in response to environmental conditions?                                             | No  | No.No info.                                                                                                                                               | High      |
| 29                              | 6.02 | Is the taxon likely to produce viable gametes or propagules (in the RA area)?                                                                                      | Yes | The conditions for maturation are available in the RA area                                                                                                | Very high |
| 30                              | 6.03 | Is the taxon likely to hybridise naturally with native taxa?                                                                                                       | No  | There are no native coregonids in RA area.                                                                                                                | Very high |
| 31                              | 6.04 | Is the taxon likely to be hermaphroditic or to display asexual reproduction?                                                                                       | No  | No does not display asexual reproduction.                                                                                                                 | Very high |
| 32                              | 6.05 | Is the taxon dependent on the presence of another taxon (or specific habitat features) to complete its life cycle?                                                 | No  | No. it is not dependent on the presense of another taxon to complet its life cycle.                                                                       | Very high |
| 33                              | 6.06 | Is the taxon known (or likely) to produce a large number of propagules or offspring within a short time span (e.g. < 1 year)?                                      | No  | Not known                                                                                                                                                 | Very high |
| 34                              | 6.07 | How many time units (days, months, years) does the taxon require to reach the age-at-first-reproduction?                                                           | 4   | From 3-5 (Kottelat & Freyhof, 2007)                                                                                                                       | High      |
| <b>7. Dispersal mechanisms</b>  |      |                                                                                                                                                                    |     |                                                                                                                                                           |           |
| 35                              | 7.01 | How many potential internal vectors/pathways could the taxon use to disperse within the RA area (with suitable                                                     | One | Aquaculture                                                                                                                                               | Very high |
| 36                              | 7.02 | Will any of these vectors/pathways bring the taxon in close proximity to one or more protected areas (e.g. MCZ, MPA, SSSI)?                                        | No  | Stocking is not allowed in protected areas                                                                                                                | Very high |
| 37                              | 7.03 | Does the taxon have a means of actively attaching itself to hard substrata (e.g. ship hulls, pilings, buoys) such that it enhances the likelihood of dispersal?    | No  | No. Can not attach to anything. does not have that morphological traits that will allow them to attach. Thanks                                            | Very high |
| 38                              | 7.04 | Is natural dispersal of the taxon likely to occur as eggs (for animals) or as propagules (for plants: seeds, spores) in the RA area?                               | No  | No. less likely.                                                                                                                                          | High      |
| 39                              | 7.05 | Is natural dispersal of the taxon likely to occur as larvae/juveniles (for animals) or as fragments/seedlings (for plants) in the RA area?                         | No  | No. no data.                                                                                                                                              | High      |
| 40                              | 7.06 | Are older life stages of the taxon likely to migrate in the RA area for reproduction?                                                                              | No  | No does not migrate                                                                                                                                       | Very high |
| 41                              | 7.07 | Are propagules or eggs of the taxon likely to be dispersed in the RA area by other animals?                                                                        | No  | No, it is not possible.                                                                                                                                   | Very high |
| 42                              | 7.08 | Is dispersal of the taxon along any of the vectors/pathways mentioned in the previous seven questions (35-41; i.e. both unintentional or intentional) likely to be | No  | As far as we know, no.                                                                                                                                    | High      |
| 43                              | 7.09 | Is dispersal of the taxon density dependent?                                                                                                                       | No  | No. Not likely                                                                                                                                            | High      |
| <b>8. Tolerance attributes</b>  |      |                                                                                                                                                                    |     |                                                                                                                                                           |           |
| 44                              | 8.01 | Is the taxon able to withstand being out of water for extended periods (e.g. minimum of one or more hours) at some stage of its life cycle?                        | No  | No. It is not documented                                                                                                                                  | High      |

|                          |      |                                                                                                                                                                              |          |                                                                                                                                                                                                                                                   |           |
|--------------------------|------|------------------------------------------------------------------------------------------------------------------------------------------------------------------------------|----------|---------------------------------------------------------------------------------------------------------------------------------------------------------------------------------------------------------------------------------------------------|-----------|
| 45                       | 8.02 | Is the taxon tolerant of a wide range of water quality conditions relevant to that taxon? [In the Justification field, indicate the relevant water quality variable(s) being | No       | This species requires specific conditions and are not tolerant to wide range of water quality conditions                                                                                                                                          | Very high |
| 46                       | 8.03 | Can the taxon be controlled or eradicated in the wild with chemical, biological, or other agents/means?                                                                      | No       | No, it can not be.                                                                                                                                                                                                                                | Very high |
| 47                       | 8.04 | Is the taxon likely to tolerate or benefit from environmental/human disturbance?                                                                                             | No       | No, not documented                                                                                                                                                                                                                                | Very high |
| 48                       | 8.05 | Is the taxon able to tolerate salinity levels that are higher or lower than those found in its usual environment?                                                            | No       | No. Cann not tolerate.                                                                                                                                                                                                                            | High      |
| 49                       | 8.06 | Are there effective natural enemies (predators) of the taxon present in the RA                                                                                               | No       | No. there are not.                                                                                                                                                                                                                                | High      |
| <b>C. Climate change</b> |      |                                                                                                                                                                              |          |                                                                                                                                                                                                                                                   |           |
| <b>9. Climate change</b> |      |                                                                                                                                                                              |          |                                                                                                                                                                                                                                                   |           |
| 50                       | 9.01 | Under the predicted future climatic conditions, are the risks of entry into the RA area posed by the taxon likely to increase, decrease or not change?                       | Increase | It was hypotheses that climate change might alert the mechanisms of transportation and introduction of non-native species. Commercial and recreational activities will increase, that itself increases the propaule pressure levels of non-native | High      |
| 51                       | 9.02 | Under the predicted future climatic conditions, are the risks of establishment posed by the taxon likely to increase, decrease or not change?                                | Decrease | In terms of increased temperatures this species will be having troubles to survive in the wild                                                                                                                                                    | High      |
| 52                       | 9.03 | Under the predicted future climatic conditions, are the risks of dispersal within the RA area posed by the taxon likely to increase, decrease or not change?                 | Decrease | Increased temperatures will cause stress in their populations making their populations weaker, therefore it won't be available to disperse                                                                                                        | High      |
| 53                       | 9.04 | Under the predicted future climatic conditions, what is the likely magnitude of future potential impacts on biodiversity and/or ecological integrity/status?                 | Lower    | The environment for them will be unbearable and this species populations will decrease, making the impact lower.                                                                                                                                  | High      |
| 54                       | 9.05 | Under the predicted future climatic conditions, what is the likely magnitude of future potential impacts on ecosystem structure and/or function?                             | Lower    | If there is any, in future it will be lower.                                                                                                                                                                                                      | High      |
| 55                       | 9.06 | Under the predicted future climatic conditions, what is the likely magnitude of future potential impacts on ecosystem services/socio-economic factors?                       | Lower    | the magnitude of future potential impact is low.                                                                                                                                                                                                  | High      |

| Statistics                                     |      |
|------------------------------------------------|------|
| Scores                                         |      |
| BRA                                            | 1.0  |
| BRA Outcome                                    | -    |
| BRA+CCA                                        | -7.0 |
| BRA+CCA Outcome                                | -    |
| Score partition                                |      |
| A. Biogeography/Historical                     | 6.0  |
| 1. Domestication/Cultivation                   | 4.0  |
| 2. Climate, distribution and introduction risk | 1.0  |
| 3. Invasive elsewhere                          | 1.0  |
| B. Biology/Ecology                             | -5.0 |
| 4. Undesirable (or persistence) traits         | 3.0  |
| 5. Resource exploitation                       | 0.0  |
| 6. Reproduction                                | -1.0 |
| 7. Dispersal mechanisms                        | -5.0 |
| 8. Tolerance attributes                        | -2.0 |
| C. Climate change                              | -8.0 |
| 9. Climate change                              | -8.0 |
| Answered Questions                             |      |
| Total                                          | 55   |
| A. Biogeography/Historical                     | 13   |
| 1. Domestication/Cultivation                   | 3    |
| 2. Climate, distribution and introduction risk | 5    |
| 3. Invasive elsewhere                          | 5    |
| B. Biology/Ecology                             | 36   |
| 4. Undesirable (or persistence) traits         | 12   |
| 5. Resource exploitation                       | 2    |
| 6. Reproduction                                | 7    |
| 7. Dispersal mechanisms                        | 9    |
| 8. Tolerance attributes                        | 6    |
| C. Climate change                              | 6    |
| 9. Climate change                              | 6    |
| Sectors affected                               |      |
| Commercial                                     | 2    |
| Environmental                                  | -3   |
| Species or population nuisance traits          | -5   |

| Thresholds |      |
|------------|------|
| BRA        | -    |
| BRA+CCA    | -    |
| Confidence |      |
| BRA+CCA    | 0.80 |
| BRA        | 0.81 |

|     |      |
|-----|------|
| CCA | 0.75 |
|-----|------|

|                     |
|---------------------|
| Date and Time       |
| 20/05/2022 16:40:04 |

## AS-ISK v2

| Taxon and Assessor details         |                                                                                                                                         |
|------------------------------------|-----------------------------------------------------------------------------------------------------------------------------------------|
| Category                           | Fishes and Lampreys (freshwater)                                                                                                        |
| Taxon name                         | <i>Ctenopharyngodon idella</i>                                                                                                          |
| Common name                        | grass carp                                                                                                                              |
| Assessor                           | Bella Japoshvili                                                                                                                        |
| Risk screening context             |                                                                                                                                         |
| Reason and socio-economic benefits | Continuous introduction into South Caucasus region. Not yet established population form the RA                                          |
| Risk assessment area               | South Caucasus                                                                                                                          |
| Taxonomy                           | Actinopteri (ray-finned fishes) > Cypriniformes (Carps) > Xenocypridae (East Asian minnows)                                             |
| Native range                       | China                                                                                                                                   |
| Introduced range                   | Worldwide                                                                                                                               |
| URL                                | <a href="https://www.fishbase.de/summary/Ctenopharyngodon-idella.html">https://www.fishbase.de/summary/Ctenopharyngodon-idella.html</a> |

|                                                |      | Response                                                                                                                                                                | Justification (references and/or other information) | Confidence                                                                                                                                                                                                                                                                                                                                                    |           |
|------------------------------------------------|------|-------------------------------------------------------------------------------------------------------------------------------------------------------------------------|-----------------------------------------------------|---------------------------------------------------------------------------------------------------------------------------------------------------------------------------------------------------------------------------------------------------------------------------------------------------------------------------------------------------------------|-----------|
| A. Biogeography/Historical                     |      |                                                                                                                                                                         |                                                     |                                                                                                                                                                                                                                                                                                                                                               |           |
| 1. Domestication/Cultivation                   |      |                                                                                                                                                                         |                                                     |                                                                                                                                                                                                                                                                                                                                                               |           |
| 1                                              | 1.01 | Has the taxon been the subject of domestication (or cultivation) for at least 20 generations?                                                                           | Yes                                                 | Shireman JV; Smith CR, 1983. Synopsis of biological data on the grass carp, <i>Ctenopharyngodon idella</i> (Cuvier and Valenciennes, 1844). FAO Fisheries Synopsis, No. 135:iv + 86pp.; [distribution restricted.].                                                                                                                                           | Very high |
| 2                                              | 1.02 | Is the taxon harvested in the wild and likely to be sold or used in its live form?                                                                                      | Yes                                                 | Cudmore, B. M. N. E., & Mandrak, N. E. (2004). Biological synopsis of grass carp ( <i>Ctenopharyngodon idella</i> ). Canadian manuscript report of fisheries and Aquatic Sciences, 2705(7), 1-44.                                                                                                                                                             | Very high |
| 3                                              | 1.03 | Does the taxon have invasive races, varieties, sub-taxa or congeners?                                                                                                   | No                                                  | No other taxa within the genus is known as invasive                                                                                                                                                                                                                                                                                                           | Medium    |
| 2. Climate, distribution and introduction risk |      |                                                                                                                                                                         |                                                     |                                                                                                                                                                                                                                                                                                                                                               |           |
| 4                                              | 2.01 | How similar are the climatic conditions of the Risk Assessment (RA) area and the taxon's native range?                                                                  | Low                                                 | Results of climatch algorithm                                                                                                                                                                                                                                                                                                                                 | Medium    |
| 5                                              | 2.02 | What is the quality of the climate matching data?                                                                                                                       | Low                                                 | Due to low accuracy of local climate data                                                                                                                                                                                                                                                                                                                     | High      |
| 6                                              | 2.03 | Is the taxon already present outside of captivity in the RA area?                                                                                                       | No                                                  | Kuljanishvili, T., Mumladze, L., Japoshvili, B., Mustafayev, N., Ibrahimov, S., Patoka, J., ... & Kalous, L. (2021). The first unified inventory of non-native fishes of the South Caucasian countries, Armenia, Azerbaijan, and Georgia. Knowledge & Management of Aquatic Ecosystems, (422), 32.                                                            | High      |
| 7                                              | 2.04 | How many potential vectors could the taxon use to enter in the RA area?                                                                                                 | One                                                 | Acuacultural purpose                                                                                                                                                                                                                                                                                                                                          | High      |
| 8                                              | 2.05 | Is the taxon currently found in close proximity to, and likely to enter into, the RA area in the near future (e.g. unintentional and intentional introductions)?        | No                                                  | No well presented distribution of established populations                                                                                                                                                                                                                                                                                                     | Low       |
| 3. Invasive elsewhere                          |      |                                                                                                                                                                         |                                                     |                                                                                                                                                                                                                                                                                                                                                               |           |
| 9                                              | 3.01 | Has the taxon become naturalised (established viable populations) outside its native range?                                                                             | Yes                                                 | Shireman JV; Smith CR, 1983. Synopsis of biological data on the grass carp, <i>Ctenopharyngodon idella</i> (Cuvier and Valenciennes, 1844). FAO Fisheries Synopsis, No. 135:iv + 86pp.; [distribution restricted.].                                                                                                                                           | Very high |
| 10                                             | 3.02 | In the taxon's introduced range, are there known adverse impacts to wild stocks or commercial taxa?                                                                     | Yes                                                 | Petr T, 2000. Interactions between fish and aquatic macrophytes in inland waters a review. FAO Fisheries Technical Paper, No. 396:185 pp. Shireman JV; Smith CR, 1983. Synopsis of biological data on the grass carp, <i>Ctenopharyngodon idella</i> (Cuvier and Valenciennes, 1844). FAO Fisheries Synopsis, No. 135:iv + 86pp.; [distribution restricted.]. | Medium    |
| 11                                             | 3.03 | In the taxon's introduced range, are there known adverse impacts to aquaculture?                                                                                        | No                                                  | CABI, 2021. <i>Ctenopharyngodon idella</i> (grass carp). <a href="https://www.cabi.org/isc/datasheet/16772">https://www.cabi.org/isc/datasheet/16772</a> (accessed November                                                                                                                                                                                   | Medium    |
| 12                                             | 3.04 | In the taxon's introduced range, are there known adverse impacts to ecosystem                                                                                           | No                                                  | CABI, 2021. <i>Ctenopharyngodon idella</i> (grass carp). <a href="https://www.cabi.org/isc/datasheet/16772">https://www.cabi.org/isc/datasheet/16772</a> (accessed November                                                                                                                                                                                   | Medium    |
| 13                                             | 3.05 | In the taxon's introduced range, are there known adverse socio-economic impacts?                                                                                        | No                                                  | CABI, 2021. <i>Ctenopharyngodon idella</i> (grass carp). <a href="https://www.cabi.org/isc/datasheet/16772">https://www.cabi.org/isc/datasheet/16772</a> (accessed November                                                                                                                                                                                   | Medium    |
| B. Biology/Ecology                             |      |                                                                                                                                                                         |                                                     |                                                                                                                                                                                                                                                                                                                                                               |           |
| 4. Undesirable (or persistence) traits         |      |                                                                                                                                                                         |                                                     |                                                                                                                                                                                                                                                                                                                                                               |           |
| 14                                             | 4.01 | Is it likely that the taxon will be poisonous or pose other risks to human health?                                                                                      | No                                                  | Not a harmful species                                                                                                                                                                                                                                                                                                                                         | Very high |
| 15                                             | 4.02 | Is it likely that the taxon will smother one or more native taxa (that are not threatened or protected)?                                                                | Yes                                                 | Petr T, 2000. Interactions between fish and aquatic macrophytes in inland waters a review. FAO Fisheries Technical Paper, No. 396:185 pp. Shireman JV; Smith CR, 1983. Synopsis of biological data on the grass carp, <i>Ctenopharyngodon idella</i> (Cuvier and Valenciennes, 1844). FAO Fisheries Synopsis, No. 135:iv + 86pp.; [distribution restricted.]. | Low       |
| 16                                             | 4.03 | Are there any threatened or protected taxa that the non-native taxon would parasitise in the RA area?                                                                   | No                                                  | Not a parasite species                                                                                                                                                                                                                                                                                                                                        | Very high |
| 17                                             | 4.04 | Is the taxon adaptable in terms of climatic and other environmental conditions, thus enhancing its potential persistence if it has invaded or could invade the RA area? | Yes                                                 | Shireman JV; Smith CR, 1983. Synopsis of biological data on the grass carp, <i>Ctenopharyngodon idella</i> (Cuvier and Valenciennes, 1844). FAO Fisheries Synopsis, No. 135:iv + 86pp.; [distribution restricted.].                                                                                                                                           | Medium    |
| 18                                             | 4.05 | Is the taxon likely to disrupt food-web structure/function in aquatic ecosystems if it has invaded or is likely to invade the RA area?                                  | Yes                                                 | Shireman JV; Smith CR, 1983. Synopsis of biological data on the grass carp, <i>Ctenopharyngodon idella</i> (Cuvier and Valenciennes, 1844). FAO Fisheries Synopsis, No. 135:iv + 86pp.; [distribution restricted.].                                                                                                                                           | Medium    |

|                                 |      |                                                                                                                                                                    |     |                                                                                                                                                                                                                                                                                                    |           |
|---------------------------------|------|--------------------------------------------------------------------------------------------------------------------------------------------------------------------|-----|----------------------------------------------------------------------------------------------------------------------------------------------------------------------------------------------------------------------------------------------------------------------------------------------------|-----------|
| 19                              | 4.06 | Is the taxon likely to exert adverse impacts on ecosystem services in the RA area?                                                                                 | No  | Usually positive effects are reported on ecosystems and ecosystem services (CABI, 2021. <i>Ctenopharyngodon idella</i> (grass carp). <a href="https://www.cabi.org/isc/datasheet/16772">https://www.cabi.org/isc/datasheet/16772</a> (accessed November 2021))                                     | Medium    |
| 20                              | 4.07 | Is it likely that the taxon will host, and/or act as a vector for, recognised pests and infectious agents that are endemic in the RA                               | No  | Based on professional judgement                                                                                                                                                                                                                                                                    | Medium    |
| 21                              | 4.08 | Is it likely that the taxon will host, and/or act as a vector for, recognised pests and infectious agents that are absent from (novel to) the RA area?             | Yes | Based on professional judgement                                                                                                                                                                                                                                                                    | Medium    |
| 22                              | 4.09 | Is it likely that the taxon will achieve a body size that will make it more likely to be released from captivity?                                                  | Yes | Kottelat, M., & Freyhof, J. (2007). Handbook of European freshwater fishes. Publications Kottelat.                                                                                                                                                                                                 | High      |
| 23                              | 4.10 | Is the taxon capable of sustaining itself in a range of water velocity conditions (e.g. versatile in habitat use)?                                                 | No  | Cudmore, B. M. N. E., & Mandrak, N. E. (2004). Biological synopsis of grass carp ( <i>Ctenopharyngodon idella</i> ). Canadian manuscript report of fisheries and Aquatic Sciences, 2705(7), 1-44.                                                                                                  | Low       |
| 24                              | 4.11 | Is it likely that the taxon's mode of existence (e.g. excretion of by-products) or behaviours (e.g. feeding) will reduce habitat quality for native taxa?          | No  | CABI, 2021. <i>Ctenopharyngodon idella</i> (grass carp). <a href="https://www.cabi.org/isc/datasheet/16772">https://www.cabi.org/isc/datasheet/16772</a> (accessed November 2021)                                                                                                                  | Medium    |
| 25                              | 4.12 | Is the taxon likely to maintain a viable population even when present in low densities (or persisting in adverse conditions by way of a dormant form)?             | No  | No documented evidence exist                                                                                                                                                                                                                                                                       | Medium    |
| <b>5. Resource exploitation</b> |      |                                                                                                                                                                    |     |                                                                                                                                                                                                                                                                                                    |           |
| 26                              | 5.01 | Is the taxon likely to consume threatened or protected native taxa in the RA area?                                                                                 | No  | Based on professional judgement                                                                                                                                                                                                                                                                    | High      |
| 27                              | 5.02 | Is the taxon likely to sequester food resources (including nutrients) to the detriment of native taxa in the RA area?                                              | Yes | Based on professional judgement                                                                                                                                                                                                                                                                    | High      |
| <b>6. Reproduction</b>          |      |                                                                                                                                                                    |     |                                                                                                                                                                                                                                                                                                    |           |
| 28                              | 6.01 | Is the taxon likely to exhibit parental care and/or to reduce age-at-maturity in response to environmental conditions?                                             | No  | Shireman, J.V. and C.R. Smith, 1983. Synopsis of biological data on the grass carp, <i>Ctenopharyngodon idella</i> (Cuvier and Valenciennes, 1884). FAO Fish. Synop. No.135, 86 p                                                                                                                  | High      |
| 29                              | 6.02 | Is the taxon likely to produce viable gametes or propagules (in the RA area)?                                                                                      | No  | Kuljanishvili, T., Mumladze, L., Japoshvili, B., Mustafayev, N., Ibrahimov, S., Patoka, J., ... & Kalous, L. (2021). The first unified inventory of non-native fishes of the South Caucasian countries, Armenia, Azerbaijan, and Georgia. Knowledge & Management of Aquatic Ecosystems, (422), 32. | High      |
| 30                              | 6.03 | Is the taxon likely to hybridise naturally with native taxa?                                                                                                       | No  | No such fact is known and not expected in RA area based professional experience                                                                                                                                                                                                                    | Medium    |
| 31                              | 6.04 | Is the taxon likely to be hermaphroditic or to display asexual reproduction?                                                                                       | No  | Shireman, J.V. and C.R. Smith, 1983. Synopsis of biological data on the grass carp, <i>Ctenopharyngodon idella</i> (Cuvier and Valenciennes, 1884). FAO Fish. Synop. No.135, 86 p                                                                                                                  | Medium    |
| 32                              | 6.05 | Is the taxon dependent on the presence of another taxon (or specific habitat features) to complete its life cycle?                                                 | No  | Not such a dependency is ever observed                                                                                                                                                                                                                                                             | Very high |
| 33                              | 6.06 | Is the taxon known (or likely) to produce a large number of propagules or offspring within a short time span (e.g. < 1 year)?                                      | Yes | More than milion eggs a year (Cudmore, B. M. N. E., & Mandrak, N. E. (2004). Biological synopsis of grass carp ( <i>Ctenopharyngodon idella</i> ). Canadian manuscript report of fisheries and Aquatic Sciences, 2705(7), 1-44.)                                                                   | Very high |
| 34                              | 6.07 | How many time units (days, months, years) does the taxon require to reach the age-at-first-reproduction?                                                           | 5   | years                                                                                                                                                                                                                                                                                              | High      |
| <b>7. Dispersal mechanisms</b>  |      |                                                                                                                                                                    |     |                                                                                                                                                                                                                                                                                                    |           |
| 35                              | 7.01 | How many potential internal vectors/pathways could the taxon use to disperse within the RA area (with suitable                                                     | One | This species is and can only spread via aquacultural purpose in RA area. This is supposed based on own experience                                                                                                                                                                                  | High      |
| 36                              | 7.02 | Will any of these vectors/pathways bring the taxon in close proximity to one or more protected areas (e.g. MCZ, MPA, SSSI)?                                        | Yes | This includes Colkhetti national park and surroundings                                                                                                                                                                                                                                             | High      |
| 37                              | 7.03 | Does the taxon have a means of actively attaching itself to hard substrata (e.g. ship hulls, pilings, buoys) such that it enhances the likelihood of dispersal?    | No  | No such fact is ever observed                                                                                                                                                                                                                                                                      | Very high |
| 38                              | 7.04 | Is natural dispersal of the taxon likely to occur as eggs (for animals) or as propagules (for plants: seeds, spores) in the RA area?                               | Yes | Pelagic eggs are drifting along the river                                                                                                                                                                                                                                                          | Very high |
| 39                              | 7.05 | Is natural dispersal of the taxon likely to occur as larvae/juveniles (for animals) or as fragments/seedlings (for plants) in the RA area?                         | Yes | CABI, 2021. <i>Ctenopharyngodon idella</i> (grass carp). <a href="https://www.cabi.org/isc/datasheet/16772">https://www.cabi.org/isc/datasheet/16772</a> (accessed November 2021)                                                                                                                  | Very high |
| 40                              | 7.06 | Are older life stages of the taxon likely to migrate in the RA area for reproduction?                                                                              | No  | Not migrant species (Cudmore, B. M. N. E., & Mandrak, N. E. (2004). Biological synopsis of grass carp ( <i>Ctenopharyngodon idella</i> ). Canadian manuscript report of fisheries and Aquatic Sciences, 2705(7), 1-44.)                                                                            | Very high |
| 41                              | 7.07 | Are propagules or eggs of the taxon likely to be dispersed in the RA area by other animals?                                                                        | No  | No, Such fact is not known                                                                                                                                                                                                                                                                         | Very high |
| 42                              | 7.08 | Is dispersal of the taxon along any of the vectors/pathways mentioned in the previous seven questions (35-41; i.e. both unintentional or intentional) likely to be | Yes | The introduction usually happens with lare amount of juveniles                                                                                                                                                                                                                                     | High      |
| 43                              | 7.09 | Is dispersal of the taxon density dependent?                                                                                                                       | No  | No documented evidence exist                                                                                                                                                                                                                                                                       | Low       |
| <b>8. Tolerance attributes</b>  |      |                                                                                                                                                                    |     |                                                                                                                                                                                                                                                                                                    |           |

|    |      |                                                                                                                                                                              |     |                                                                                                                                                                            |        |
|----|------|------------------------------------------------------------------------------------------------------------------------------------------------------------------------------|-----|----------------------------------------------------------------------------------------------------------------------------------------------------------------------------|--------|
| 44 | 8.01 | Is the taxon able to withstand being out of water for extended periods (e.g. minimum of one or more hours) at some stage of its life cycle?                                  | No  | No documented evidence exist                                                                                                                                               | High   |
| 45 | 8.02 | Is the taxon tolerant of a wide range of water quality conditions relevant to that taxon? [In the Justification field, indicate the relevant water quality variable(s) being | Yes | CABI, 2021. Ctenopharyngodon idella (grass carp). <a href="https://www.cabi.org/isc/datasheet/16772">https://www.cabi.org/isc/datasheet/16772</a> (accessed November 2021) | High   |
| 46 | 8.03 | Can the taxon be controlled or eradicated in the wild with chemical, biological, or other agents/means?                                                                      | No  | No documented evidence exist                                                                                                                                               | Low    |
| 47 | 8.04 | Is the taxon likely to tolerate or benefit from environmental/human disturbance?                                                                                             | No  | No documented evidence exist                                                                                                                                               | Medium |
| 48 | 8.05 | Is the taxon able to tolerate salinity levels that are higher or lower than those found in its usual environment?                                                            | Yes | Frimodt, C., 1995. Multilingual illustrated guide to the world's commercial warmwater fish. Fishing News Books, Osney Mead, Oxford, England. 215 p.                        | Medium |
| 49 | 8.06 | Are there effective natural enemies (predators) of the taxon present in the RA                                                                                               | No  | Not an effective enemies have been observed in RA area                                                                                                                     | High   |

#### C. Climate change

##### 9. Climate change

|    |      |                                                                                                                                                              |           |                                         |     |
|----|------|--------------------------------------------------------------------------------------------------------------------------------------------------------------|-----------|-----------------------------------------|-----|
| 50 | 9.01 | Under the predicted future climatic conditions, are the risks of entry into the RA area posed by the taxon likely to increase, decrease or not change?       | No change | Solely based on professional experience | Low |
| 51 | 9.02 | Under the predicted future climatic conditions, are the risks of establishment posed by the taxon likely to increase, decrease or not change?                | Increase  | Based on professional judgement         | Low |
| 52 | 9.03 | Under the predicted future climatic conditions, are the risks of dispersal within the RA area posed by the taxon likely to increase, decrease or not change? | Increase  | Based on professional judgement         | Low |
| 53 | 9.04 | Under the predicted future climatic conditions, what is the likely magnitude of future potential impacts on biodiversity and/or ecological integrity/status? | Higher    | Based on professional judgement         | Low |
| 54 | 9.05 | Under the predicted future climatic conditions, what is the likely magnitude of future potential impacts on ecosystem structure and/or function?             | Higher    | Based on professional judgement         | Low |
| 55 | 9.06 | Under the predicted future climatic conditions, what is the likely magnitude of future potential impacts on ecosystem services/socio-economic factors?       | Higher    | Based on professional judgement         | Low |

| Statistics                                     |             |
|------------------------------------------------|-------------|
| Scores                                         |             |
| <b>BRA</b>                                     | <b>18.0</b> |
| <b>BRA Outcome</b>                             | -           |
| <b>BRA+CCA</b>                                 | <b>28.0</b> |
| <b>BRA+CCA Outcome</b>                         | -           |
| Score partition                                |             |
| <b>A. Biogeography/Historical</b>              | <b>8.0</b>  |
| 1. Domestication/Cultivation                   | 2.0         |
| 2. Climate, distribution and introduction risk | 0.0         |
| 3. Invasive elsewhere                          | 6.0         |
| <b>B. Biology/Ecology</b>                      | <b>10.0</b> |
| 4. Undesirable (or persistence) traits         | 5.0         |
| 5. Resource exploitation                       | 2.0         |
| 6. Reproduction                                | -1.0        |
| 7. Dispersal mechanisms                        | 1.0         |
| 8. Tolerance attributes                        | 3.0         |
| <b>C. Climate change</b>                       | <b>10.0</b> |
| 9. Climate change                              | 10.0        |
| Answered Questions                             |             |
| <b>Total</b>                                   | <b>55</b>   |
| <b>A. Biogeography/Historical</b>              | <b>13</b>   |
| 1. Domestication/Cultivation                   | 3           |
| 2. Climate, distribution and introduction risk | 5           |
| 3. Invasive elsewhere                          | 5           |
| <b>B. Biology/Ecology</b>                      | <b>36</b>   |
| 4. Undesirable (or persistence) traits         | 12          |
| 5. Resource exploitation                       | 2           |
| 6. Reproduction                                | 7           |
| 7. Dispersal mechanisms                        | 9           |
| 8. Tolerance attributes                        | 6           |
| <b>C. Climate change</b>                       | <b>6</b>    |
| 9. Climate change                              | 6           |
| Sectors affected                               |             |
| <b>Commercial</b>                              | <b>10</b>   |
| <b>Environmental</b>                           | <b>6</b>    |
| <b>Species or population nuisance traits</b>   | <b>14</b>   |

| Thresholds |   |
|------------|---|
| <b>BRA</b> | - |



|                   |                |             |
|-------------------|----------------|-------------|
|                   | <b>BRA+CCA</b> | <b>-</b>    |
| <b>Confidence</b> |                |             |
|                   | <b>BRA+CCA</b> | <b>0.63</b> |
|                   | <b>BRA</b>     | <b>0.67</b> |
|                   | <b>CCA</b>     | <b>0.25</b> |

|                            |  |
|----------------------------|--|
| <b>Date and Time</b>       |  |
| <b>14/05/2022 15:12:07</b> |  |

## AS-ISK v2

| Taxon and Assessor details         |                                                                                                                                         |
|------------------------------------|-----------------------------------------------------------------------------------------------------------------------------------------|
| Category                           | Fishes and Lampreys (freshwater)                                                                                                        |
| Taxon name                         | <i>Ctenopharyngodon idella</i>                                                                                                          |
| Common name                        | grass carp                                                                                                                              |
| Assessor                           | Giorgi Epitashvili                                                                                                                      |
| Risk screening context             |                                                                                                                                         |
| Reason and socio-economic benefits | Grass carp is cultivated in China for food, but was introduced in Europe and the United States for                                      |
| Risk assessment area               | South Caucasus                                                                                                                          |
| Taxonomy                           | <i>Ctenopharyngodon idella</i> (Valenciennes, 1844)                                                                                     |
| Native range                       | Asia: Eastern China and Russia in eastern Siberia, Amur River system.                                                                   |
| Introduced range                   | Widely transported around the world. Introduced in Europe and the United States for aquatic weed                                        |
| URL                                | <a href="https://www.fishbase.se/summary/Ctenopharyngodon-idella.html">https://www.fishbase.se/summary/Ctenopharyngodon-idella.html</a> |

|                                                |      |                                                                                                                                                                         | Response | Justification (references and/or other information)                                                                                                                                                                                                                                                                       | Confidence |
|------------------------------------------------|------|-------------------------------------------------------------------------------------------------------------------------------------------------------------------------|----------|---------------------------------------------------------------------------------------------------------------------------------------------------------------------------------------------------------------------------------------------------------------------------------------------------------------------------|------------|
| A. Biogeography/Historical                     |      |                                                                                                                                                                         |          |                                                                                                                                                                                                                                                                                                                           |            |
| 1. Domestication/Cultivation                   |      |                                                                                                                                                                         |          |                                                                                                                                                                                                                                                                                                                           |            |
| 1                                              | 1.01 | Has the taxon been the subject of domestication (or cultivation) for at least 20 generations?                                                                           | Yes      | It is cultivated in China for food, but was introduced in Europe and the United States for aquatic weed control, becoming the species of fish with the largest reported production in aquaculture globally, over five million tonnes per year.                                                                            | Very high  |
| 2                                              | 1.02 | Is the taxon harvested in the wild and likely to be sold or used in its live form?                                                                                      | Yes      | At present artificial propagation is the major supply of seed for the culture of grass carp, although natural seeds are still available in some rivers of China. Seed collected from the wild is mainly used for maintaining the genetic quality of the broodstock.                                                       | Very high  |
| 3                                              | 1.03 | Does the taxon have invasive races, varieties, sub-taxa or congeners?                                                                                                   | Yes      | Grass Carp has been globally introduced to waterways for purposes of controlling invasive macrophytes, but is also perceived as an invasive species when populations cause unwanted impacts to native macrophytes (Wittmann et al. 2014).                                                                                 | Very high  |
| 2. Climate, distribution and introduction risk |      |                                                                                                                                                                         |          |                                                                                                                                                                                                                                                                                                                           |            |
| 4                                              | 2.01 | How similar are the climatic conditions of the Risk Assessment (RA) area and the taxon's native range?                                                                  | Medium   | World Map of the Köppen-Geiger climate classification                                                                                                                                                                                                                                                                     | Medium     |
| 5                                              | 2.02 | What is the quality of the climate matching data?                                                                                                                       | Medium   | World Map of the Köppen-Geiger climate classification.                                                                                                                                                                                                                                                                    | Medium     |
| 6                                              | 2.03 | Is the taxon already present outside of captivity in the RA area?                                                                                                       | Yes      | This species is inhabits in Jandari, Lisi, Kumisi lakes and other lakes and reservoirs in Georgia as well as in the SC region (Ninua et al. 2013; Own unpublished data).                                                                                                                                                  | Very high  |
| 7                                              | 2.04 | How many potential vectors could the taxon use to enter in the RA area?                                                                                                 | One      | This species is enter in the SC region by humans for aquacultural purposes.                                                                                                                                                                                                                                               | High       |
| 8                                              | 2.05 | Is the taxon currently found in close proximity to, and likely to enter into, the RA area in the near future (e.g. unintentional and intentional introductions)?        | Yes      | The grass carp was first introduced outside its native area for aquaculture and aquatic management purposes after 1945 and in Turkey after 1972 (Kırkağaç 2011). This species is also distributed in the natural and artificial lakes and reservoirs in the SC region.                                                    | Very high  |
| 3. Invasive elsewhere                          |      |                                                                                                                                                                         |          |                                                                                                                                                                                                                                                                                                                           |            |
| 9                                              | 3.01 | Has the taxon become naturalised (established viable populations) outside its native range?                                                                             | Yes      | As a result of intensive introduction and accidental releases, the European and central Asian areas of the USSR now have naturally reproducing grass carp populations in the Amudar'ya, Syrdar'ya, Terek, Volga and Kuban Rivers and in the Karakum Canal (Nikol'sky and Ahiev, 1974).                                    | Very high  |
| 10                                             | 3.02 | In the taxon's introduced range, are there known adverse impacts to wild stocks or commercial taxa?                                                                     | Yes      | The exotic grass carp has been used for almost a half a century in the United States as a bi- ological agent to control and manage aquatic plants. This long-lived generalist herbivore consumes large amounts of vegetation and can considerably alter habitat and impact aquatic communities (Dibble & Kovalenko 2009). | Very high  |
| 11                                             | 3.03 | In the taxon's introduced range, are there known adverse impacts to aquaculture?                                                                                        | No       | Data deficient                                                                                                                                                                                                                                                                                                            | Medium     |
| 12                                             | 3.04 | In the taxon's introduced range, are there known adverse impacts to ecosystem                                                                                           | No       | Data deficient                                                                                                                                                                                                                                                                                                            | Medium     |
| 13                                             | 3.05 | In the taxon's introduced range, are there known adverse socio-economic impacts?                                                                                        | Yes      | The socio-economic study concludes that, in addition to the significant ecological threat that is posed by the presence of grass carp in the Great Lakes, there would also be economic, social and cultural ripple effects (Hayder 2019).                                                                                 | High       |
| B. Biology/Ecology                             |      |                                                                                                                                                                         |          |                                                                                                                                                                                                                                                                                                                           |            |
| 4. Undesirable (or persistence) traits         |      |                                                                                                                                                                         |          |                                                                                                                                                                                                                                                                                                                           |            |
| 14                                             | 4.01 | Is it likely that the taxon will be poisonous or pose other risks to human health?                                                                                      | No       | This species does not pose threat to humans                                                                                                                                                                                                                                                                               | High       |
| 15                                             | 4.02 | Is it likely that the taxon will smother one or more native taxa (that are not threatened or protected)?                                                                | Yes      | In Tashkent C. idella, resulted in declines in local species through superior growth and fecundity (Rosenthal, 1976).                                                                                                                                                                                                     | High       |
| 16                                             | 4.03 | Are there any threatened or protected taxa that the non-native taxon would parasitise in the RA area?                                                                   | Yes      | There are several protected and threatened species which would be impacted by C. idella, e.g. Luciobarbus capito, L. mursa, Cyprinus carpio, etc.                                                                                                                                                                         | Very high  |
| 17                                             | 4.04 | Is the taxon adaptable in terms of climatic and other environmental conditions, thus enhancing its potential persistence if it has invaded or could invade the RA area? | Yes      | This species has inhabited in the SC region for several decades however, it cannot reproduce naturally.                                                                                                                                                                                                                   | Medium     |
| 18                                             | 4.05 | Is the taxon likely to disrupt food-web structure/function in aquatic ecosystems if it has invaded or is likely to invade the RA area?                                  | Yes      | C. idella has significantly altered the food web and trophic structure of aquatic systems in USA by inducing changes in plant, invertebrate, and fish communities (NAS Database). No such fact has been observed in the Caucasus region yet.                                                                              | High       |
| 19                                             | 4.06 | Is the taxon likely to exert adverse impacts on ecosystem services in the RA area?                                                                                      | No       | Such a fact has not been observed                                                                                                                                                                                                                                                                                         | Medium     |

|                                 |      |                                                                                                                                                                              |                |                                                                                                                                                                                                                                                                   |           |
|---------------------------------|------|------------------------------------------------------------------------------------------------------------------------------------------------------------------------------|----------------|-------------------------------------------------------------------------------------------------------------------------------------------------------------------------------------------------------------------------------------------------------------------|-----------|
| 20                              | 4.07 | Is it likely that the taxon will host, and/or act as a vector for, recognised pests and infectious agents that are endemic in the RA                                         | No             | No research has been conducted in this direction                                                                                                                                                                                                                  | Low       |
| 21                              | 4.08 | Is it likely that the taxon will host, and/or act as a vector for, recognised pests and infectious agents that are absent from (novel to) the RA area?                       | Not applicable | No research has been conducted in this direction                                                                                                                                                                                                                  | Low       |
| 22                              | 4.09 | Is it likely that the taxon will achieve a body size that will make it more likely to be released from captivity?                                                            | Yes            | C. idella is a large, herbivorous, freshwater fish species. Max length : 150 cm TL male/unsexed; common length : 10.7 cm SL male/unsexed; max. published weight: 45.0 kg. It is important fish for trade and widely used throughout the world.                    | Very high |
| 23                              | 4.10 | Is the taxon capable of sustaining itself in a range of water velocity conditions (e.g. versatile in habitat use)?                                                           | No             | Adults occur in lakes, ponds, pools and backwaters of large rivers, preferring large, slow-flowing or standing water bodies with vegetation.                                                                                                                      | Very high |
| 24                              | 4.11 | Is it likely that the taxon's mode of existence (e.g. excretion of by-products) or behaviours (e.g. feeding) will reduce habitat quality for native taxa?                    | Yes            | Detrimental changes in water quality parameters (in-crease in nitrite, nitrate, phosphate concentrations) follow-ing vegetation control by grass carp were reported in moststudies that evaluated water quality (Table 5; Shireman andSmith 1983, Kirkagac and    | High      |
| 25                              | 4.12 | Is the taxon likely to maintain a viable population even when present in low densities (or persisting in adverse conditions by way of a dormant form)?                       | No             | No such fact has been documented                                                                                                                                                                                                                                  | Low       |
| <b>5. Resource exploitation</b> |      |                                                                                                                                                                              |                |                                                                                                                                                                                                                                                                   |           |
| 26                              | 5.01 | Is the taxon likely to consume threatened or protected native taxa in the RA area?                                                                                           | No             | No such fact has been documented. In general, C. idella feed on higher aquatic plants and submerged grasses; takes also detritus, insects and other invertebrates (Frimodt, 1995).                                                                                | Low       |
| 27                              | 5.02 | Is the taxon likely to sequester food resources (including nutrients) to the detriment of native taxa in the RA area?                                                        | Yes            | C. idella as an exotic species for the SC region should be competitor to native species                                                                                                                                                                           | Medium    |
| <b>6. Reproduction</b>          |      |                                                                                                                                                                              |                |                                                                                                                                                                                                                                                                   |           |
| 28                              | 6.01 | Is the taxon likely to exhibit parental care and/or to reduce age-at-maturity in response to environmental conditions?                                                       | No             | No research has been conducted in this direction                                                                                                                                                                                                                  | High      |
| 29                              | 6.02 | Is the taxon likely to produce viable gametes or propagules (in the RA area)?                                                                                                | No             | This species does not reproduces naturally in the SC region                                                                                                                                                                                                       | Very high |
| 30                              | 6.03 | Is the taxon likely to hybridise naturally with native taxa?                                                                                                                 | No             | Such fact is not known                                                                                                                                                                                                                                            | Low       |
| 31                              | 6.04 | Is the taxon likely to be hermaphroditic or to display asexual reproduction?                                                                                                 | No             | Such fact is not known                                                                                                                                                                                                                                            | Medium    |
| 32                              | 6.05 | Is the taxon dependent on the presence of another taxon (or specific habitat features) to complete its life cycle?                                                           | No             | Such fact is not known                                                                                                                                                                                                                                            | Medium    |
| 33                              | 6.06 | Is the taxon known (or likely) to produce a large number of propagules or offspring within a short time span (e.g. < 1 year)?                                                | Yes            | Fecundity reaches up to 82 000 eggs (Ninua et al. 2013).                                                                                                                                                                                                          | Medium    |
| 34                              | 6.07 | How many time units (days, months, years) does the taxon require to reach the age-at-first-reproduction?                                                                     | 4              | Sexually maturate from the age of 4 (Ninua et al. 2013).                                                                                                                                                                                                          | Very high |
| <b>7. Dispersal mechanisms</b>  |      |                                                                                                                                                                              |                |                                                                                                                                                                                                                                                                   |           |
| 35                              | 7.01 | How many potential internal vectors/pathways could the taxon use to disperse within the RA area (with suitable                                                               | One            | This species can only be spread within the SC region by humans.                                                                                                                                                                                                   | Very high |
| 36                              | 7.02 | Will any of these vectors/pathways bring the taxon in close proximity to one or more protected areas (e.g. MCZ, MPA, SSSI)?                                                  | Yes            | There is a possibility of that.                                                                                                                                                                                                                                   | Medium    |
| 37                              | 7.03 | Does the taxon have a means of actively attaching itself to hard substrata (e.g. ship hulls, pilings, buoys) such that it enhances the likelihood of dispersal?              | No             | This species does not have such means                                                                                                                                                                                                                             | High      |
| 38                              | 7.04 | Is natural dispersal of the taxon likely to occur as eggs (for animals) or as propagules (for plants: seeds, spores) in the RA area?                                         | No             | This species does not reproduces or spreads in the SC region.                                                                                                                                                                                                     | Very high |
| 39                              | 7.05 | Is natural dispersal of the taxon likely to occur as larvae/juveniles (for animals) or as fragments/seedlings (for plants) in the RA area?                                   | No             | This species does not reproduces or spreads in the SC region.                                                                                                                                                                                                     | Very high |
| 40                              | 7.06 | Are older life stages of the taxon likely to migrate in the RA area for reproduction?                                                                                        | No             | This species does not reproduces in the SC region.                                                                                                                                                                                                                | Very high |
| 41                              | 7.07 | Are propagules or eggs of the taxon likely to be dispersed in the RA area by other animals?                                                                                  | No             | No such fact has been detected.                                                                                                                                                                                                                                   | Very high |
| 42                              | 7.08 | Is dispersal of the taxon along any of the vectors/pathways mentioned in the previous seven questions (35–41; i.e. both unintentional or intentional) likely to be           | Not applicable | Data deficient                                                                                                                                                                                                                                                    | Low       |
| 43                              | 7.09 | Is dispersal of the taxon density dependent?                                                                                                                                 | Not applicable | Data deficient                                                                                                                                                                                                                                                    | Low       |
| <b>8. Tolerance attributes</b>  |      |                                                                                                                                                                              |                |                                                                                                                                                                                                                                                                   |           |
| 44                              | 8.01 | Is the taxon able to withstand being out of water for extended periods (e.g. minimum of one or more hours) at some stage of its life cycle?                                  | No             | No such fact has been described                                                                                                                                                                                                                                   | High      |
| 45                              | 8.02 | Is the taxon tolerant of a wide range of water quality conditions relevant to that taxon? [In the Justification field, indicate the relevant water quality variable(s) being | Yes            | Adults occur in lakes, ponds, pools and backwaters of large rivers, preferring large, slow-flowing or standing water bodies with vegetation. Tolerant of a wide range of temperatures from 0° to 38°C, and salinities to as much as 10 ppt and oxygen levels down | Very high |

|                          |      |                                                                                                                                                              |                |                                                                                                                                                                                                |           |
|--------------------------|------|--------------------------------------------------------------------------------------------------------------------------------------------------------------|----------------|------------------------------------------------------------------------------------------------------------------------------------------------------------------------------------------------|-----------|
| 46                       | 8.03 | Can the taxon be controlled or eradicated in the wild with chemical, biological, or other agents/means?                                                      | Not applicable | Data deficient                                                                                                                                                                                 | Low       |
| 47                       | 8.04 | Is the taxon likely to tolerate or benefit from environmental/human disturbance?                                                                             | Yes            | This species is mostly spread by humans.                                                                                                                                                       | High      |
| 48                       | 8.05 | Is the taxon able to tolerate salinity levels that are higher or lower than those found in its usual environment?                                            | Yes            | <i>C. idella</i> is tolerant of a wide range of temperatures from 0° to 38°C, and salinities to as much as 10 ppt.                                                                             | High      |
| 49                       | 8.06 | Are there effective natural enemies (predators) of the taxon present in the RA area?                                                                         | Yes            | There are several predators distributed in the SC region which can control the <i>C. idella</i> populations: eg. <i>Esox lucius</i> , Sander <i>lucio-perca</i> , <i>Silurus glanis</i> , etc. | Very high |
| <b>C. Climate change</b> |      |                                                                                                                                                              |                |                                                                                                                                                                                                |           |
| <b>9. Climate change</b> |      |                                                                                                                                                              |                |                                                                                                                                                                                                |           |
| 50                       | 9.01 | Under the predicted future climatic conditions, are the risks of entry into the RA area posed by the taxon likely to increase, decrease or not change?       | No change      | Own judgement                                                                                                                                                                                  | Medium    |
| 51                       | 9.02 | Under the predicted future climatic conditions, are the risks of establishment posed by the taxon likely to increase, decrease or not change?                | No change      | Own judgement                                                                                                                                                                                  | Medium    |
| 52                       | 9.03 | Under the predicted future climatic conditions, are the risks of dispersal within the RA area posed by the taxon likely to increase, decrease or not change? | No change      | Own judgement                                                                                                                                                                                  | Medium    |
| 53                       | 9.04 | Under the predicted future climatic conditions, what is the likely magnitude of future potential impacts on biodiversity and/or ecological integrity/status? | Lower          | Own judgement                                                                                                                                                                                  | Medium    |
| 54                       | 9.05 | Under the predicted future climatic conditions, what is the likely magnitude of future potential impacts on ecosystem structure and/or function?             | Lower          | Own judgement                                                                                                                                                                                  | Medium    |
| 55                       | 9.06 | Under the predicted future climatic conditions, what is the likely magnitude of future potential impacts on ecosystem services/socio-economic factors?       | Lower          | Own judgement                                                                                                                                                                                  | Medium    |

| Statistics                                     |             |
|------------------------------------------------|-------------|
| Scores                                         |             |
| <b>BRA</b>                                     | <b>20.5</b> |
| <b>BRA Outcome</b>                             | <b>-</b>    |
| <b>BRA+CCA</b>                                 | <b>14.5</b> |
| <b>BRA+CCA Outcome</b>                         | <b>-</b>    |
| Score partition                                |             |
| <b>A. Biogeography/Historical</b>              | <b>12.5</b> |
| 1. Domestication/Cultivation                   | 4.0         |
| 2. Climate, distribution and introduction risk | 1.0         |
| 3. Invasive elsewhere                          | 7.5         |
| <b>B. Biology/Ecology</b>                      | <b>8.0</b>  |
| 4. Undesirable (or persistence) traits         | 6.0         |
| 5. Resource exploitation                       | 2.0         |
| 6. Reproduction                                | -1.0        |
| 7. Dispersal mechanisms                        | -4.0        |
| 8. Tolerance attributes                        | 5.0         |
| <b>C. Climate change</b>                       | <b>-6.0</b> |
| 9. Climate change                              | -6.0        |
| Answered Questions                             |             |
| <b>Total</b>                                   | <b>55</b>   |
| <b>A. Biogeography/Historical</b>              | <b>13</b>   |
| 1. Domestication/Cultivation                   | 3           |
| 2. Climate, distribution and introduction risk | 5           |
| 3. Invasive elsewhere                          | 5           |
| <b>B. Biology/Ecology</b>                      | <b>36</b>   |
| 4. Undesirable (or persistence) traits         | 12          |
| 5. Resource exploitation                       | 2           |
| 6. Reproduction                                | 7           |
| 7. Dispersal mechanisms                        | 9           |
| 8. Tolerance attributes                        | 6           |
| <b>C. Climate change</b>                       | <b>6</b>    |
| 9. Climate change                              | 6           |
| Sectors affected                               |             |
| <b>Commercial</b>                              | <b>8</b>    |
| <b>Environmental</b>                           | <b>-1</b>   |
| <b>Species or population nuisance traits</b>   | <b>10</b>   |

| Thresholds     |             |
|----------------|-------------|
| <b>BRA</b>     | <b>-</b>    |
| <b>BRA+CCA</b> | <b>-</b>    |
| Confidence     |             |
| <b>BRA+CCA</b> | <b>0.69</b> |
| <b>BRA</b>     | <b>0.71</b> |
| <b>CCA</b>     | <b>0.50</b> |

| Date and Time |
|---------------|
|---------------|

03/05/2022 17:12:18

## AS-ISK v2

| Taxon and Assessor details         |                                                                                                                                         |
|------------------------------------|-----------------------------------------------------------------------------------------------------------------------------------------|
| Category                           | Fishes and Lampreys (freshwater)                                                                                                        |
| Taxon name                         | <i>Ctenopharyngodon idella</i>                                                                                                          |
| Common name                        | grass carp                                                                                                                              |
| Assessor                           | Tatia Kuljanishvili                                                                                                                     |
| Risk screening context             |                                                                                                                                         |
| Reason and socio-economic benefits | Has been introduced for aquaculture worldwide                                                                                           |
| Risk assessment area               | South Caucasus                                                                                                                          |
| Taxonomy                           | Actinopteri (ray-finned fishes) > Cypriniformes (Carps) > Xenocypridae                                                                  |
| Native range                       | Eastern China and Russia                                                                                                                |
| Introduced range                   | Worldwide                                                                                                                               |
| URL                                | <a href="https://www.fishbase.se/summary/Ctenopharyngodon-idella.html">https://www.fishbase.se/summary/Ctenopharyngodon-idella.html</a> |

|                                                |      |                                                                                                                                                                         | Response | Justification (references and/or other information)                                                                                                                                                                                                                                                                                                                                                                                                                                                                         | Confidence |
|------------------------------------------------|------|-------------------------------------------------------------------------------------------------------------------------------------------------------------------------|----------|-----------------------------------------------------------------------------------------------------------------------------------------------------------------------------------------------------------------------------------------------------------------------------------------------------------------------------------------------------------------------------------------------------------------------------------------------------------------------------------------------------------------------------|------------|
| A. Biogeography/Historical                     |      |                                                                                                                                                                         |          |                                                                                                                                                                                                                                                                                                                                                                                                                                                                                                                             |            |
| 1. Domestication/Cultivation                   |      |                                                                                                                                                                         |          |                                                                                                                                                                                                                                                                                                                                                                                                                                                                                                                             |            |
| 1                                              | 1.01 | Has the taxon been the subject of domestication (or cultivation) for at least 20 generations?                                                                           | Yes      | It has been grown in aquaculture facilities more than 20 generations                                                                                                                                                                                                                                                                                                                                                                                                                                                        | Very high  |
| 2                                              | 1.02 | Is the taxon harvested in the wild and likely to be sold or used in its live form?                                                                                      | Yes      | Yes. Taxon is harvested in wild and is sold in its live form                                                                                                                                                                                                                                                                                                                                                                                                                                                                | Very high  |
| 3                                              | 1.03 | Does the taxon have invasive races, varieties, sub-taxa or congeners?                                                                                                   | Yes      | Yes. for example Hypophthalmichthys nobilis and H. molitrix                                                                                                                                                                                                                                                                                                                                                                                                                                                                 | Very high  |
| 2. Climate, distribution and introduction risk |      |                                                                                                                                                                         |          |                                                                                                                                                                                                                                                                                                                                                                                                                                                                                                                             |            |
| 4                                              | 2.01 | How similar are the climatic conditions of the Risk Assessment (RA) area and the taxon's native range?                                                                  | Medium   | The climate is more or less similar out of 19 stations, 15 match at value 9 (out of 10).                                                                                                                                                                                                                                                                                                                                                                                                                                    | Very high  |
| 5                                              | 2.02 | What is the quality of the climate matching data?                                                                                                                       | Medium   | Climatch data is medium since there are not much station on the RA area                                                                                                                                                                                                                                                                                                                                                                                                                                                     | Medium     |
| 6                                              | 2.03 | Is the taxon already present outside of captivity in the RA area?                                                                                                       | Yes      | This species is released in ponds and rivers in RA area                                                                                                                                                                                                                                                                                                                                                                                                                                                                     | Very high  |
| 7                                              | 2.04 | How many potential vectors could the taxon use to enter in the RA area?                                                                                                 | >1       | Aquaculture, recreational fisheries                                                                                                                                                                                                                                                                                                                                                                                                                                                                                         | Very high  |
| 8                                              | 2.05 | Is the taxon currently found in close proximity to, and likely to enter into, the RA area in the near future (e.g. unintentional and intentional introductions)?        | Yes      | This species is released in ponds and rivers in RA area                                                                                                                                                                                                                                                                                                                                                                                                                                                                     | Very high  |
| 3. Invasive elsewhere                          |      |                                                                                                                                                                         |          |                                                                                                                                                                                                                                                                                                                                                                                                                                                                                                                             |            |
| 9                                              | 3.01 | Has the taxon become naturalised (established viable populations) outside its introduced range?                                                                         | Yes      | Yes in some places of suitable climate.                                                                                                                                                                                                                                                                                                                                                                                                                                                                                     | High       |
| 10                                             | 3.02 | In the taxon's introduced range, are there known adverse impacts to wild stocks or commercial taxa?                                                                     | Yes      | Negative impact include the shaping of zooplanktonic communities and predation pressure (competition) on other planktonivorous species (Spataru & Gophen 1985)                                                                                                                                                                                                                                                                                                                                                              | High       |
| 11                                             | 3.03 | In the taxon's introduced range, are there known adverse impacts to aquaculture?                                                                                        | Yes      | it is not known, but possibly the competition with native planktonivorous fish can affect the aquaculture (Spataru & Gophen 1985)                                                                                                                                                                                                                                                                                                                                                                                           | Medium     |
| 12                                             | 3.04 | In the taxon's introduced range, are there known adverse impacts to ecosystem?                                                                                          | Yes      | affects native fish fauna via shaping the zooplanktonic organisms                                                                                                                                                                                                                                                                                                                                                                                                                                                           | Medium     |
| 13                                             | 3.05 | In the taxon's introduced range, are there known adverse socio-economic impacts?                                                                                        | No       | Not known                                                                                                                                                                                                                                                                                                                                                                                                                                                                                                                   | Medium     |
| B. Biology/Ecology                             |      |                                                                                                                                                                         |          |                                                                                                                                                                                                                                                                                                                                                                                                                                                                                                                             |            |
| 4. Undesirable (or persistence) traits         |      |                                                                                                                                                                         |          |                                                                                                                                                                                                                                                                                                                                                                                                                                                                                                                             |            |
| 14                                             | 4.01 | Is it likely that the taxon will be poisonous or pose other risks to human health?                                                                                      | No       | Not poisonous                                                                                                                                                                                                                                                                                                                                                                                                                                                                                                               | Very high  |
| 15                                             | 4.02 | Is it likely that the taxon will smother one or more native taxa (that are not threatened or protected)?                                                                | Yes      | They have ability to fine filter the water and also they grow very fast and can form dense populations, they are versatile in terms of feeding and this can often lead to habitat alterations and disruption of food webs and nutrient cycles in new invaded ecosystems (Milstein et al. 1988; Cooke et al. 2009; Gozlan et al. 2010; Ma et al. 2010; Rosemberg et al. 2010. Such changes as zooplankton and phytoplankton exploitation, shaping the fish communities can affect native fishes populations that are sharing | Medium     |
| 16                                             | 4.03 | Are there any threatened or protected taxa that the non-native taxon would parasitise in the RA area?                                                                   | No       | No. does not parasite                                                                                                                                                                                                                                                                                                                                                                                                                                                                                                       | Very high  |
| 17                                             | 4.04 | Is the taxon adaptable in terms of climatic and other environmental conditions, thus enhancing its potential persistence if it has invaded or could invade the RA area? | Yes      | is tolerant of a wide range of temperatures from 0° to 38°C, and salinities to as much as 10 ppt and oxygen levels down to 0.5 ppm however, due to cold winters it is not reproducing in RA area                                                                                                                                                                                                                                                                                                                            | Medium     |
| 18                                             | 4.05 | Is the taxon likely to disrupt food-web structure/function in aquatic ecosystems if it has invaded or is likely to invade the RA area?                                  | Yes      | They have ability to fine filter the water and also they grow very fast and can form dense populations, they are versatile in terms of feeding and this can often lead to habitat alterations and disruption of food webs and nutrient cycles in new invaded ecosystems (Milstein et al. 1988; Cooke et al. 2009; Gozlan et al. 2010; Ma et al. 2010; Rosemberg et al. 2010.                                                                                                                                                | Medium     |
| 19                                             | 4.06 | Is the taxon likely to exert adverse impacts on ecosystem services in the RA area?                                                                                      | Yes      | it is possible, however, it should be mentioned that they are not known to be independently reproducing in RA                                                                                                                                                                                                                                                                                                                                                                                                               | Medium     |
| 20                                             | 4.07 | Is it likely that the taxon will host, and/or act as a vector for, recognised pests and infectious agents that are endemic in the RA area?                              | Yes      | Possible, but not documented                                                                                                                                                                                                                                                                                                                                                                                                                                                                                                | Low        |

|                                 |      |                                                                                                                                                                              |     |                                                                                                                                                                                                                                                                                                                                                                              |           |
|---------------------------------|------|------------------------------------------------------------------------------------------------------------------------------------------------------------------------------|-----|------------------------------------------------------------------------------------------------------------------------------------------------------------------------------------------------------------------------------------------------------------------------------------------------------------------------------------------------------------------------------|-----------|
| 21                              | 4.08 | Is it likely that the taxon will host, and/or act as a vector for, recognised pests and infectious agents that are absent from (novel to) the RA area?                       | Yes | it is possible. However, it is not documented.                                                                                                                                                                                                                                                                                                                               | Low       |
| 22                              | 4.09 | Is it likely that the taxon will achieve a body size that will make it more likely to be released from captivity?                                                            | Yes | yes <a href="https://fishbase.mnhn.fr/summary/Ctenopharyngodon-idella.html">https://fishbase.mnhn.fr/summary/Ctenopharyngodon-idella.html</a>                                                                                                                                                                                                                                | Very high |
| 23                              | 4.10 | Is the taxon capable of sustaining itself in a range of water velocity conditions (e.g. versatile in habitat use)?                                                           | No  | No <a href="https://fishbase.mnhn.fr/summary/Ctenopharyngodon-idella.html">https://fishbase.mnhn.fr/summary/Ctenopharyngodon-idella.html</a>                                                                                                                                                                                                                                 | High      |
| 24                              | 4.11 | Is it likely that the taxon's mode of existence (e.g. excretion of by-products) or behaviours (e.g. feeding) will reduce habitat quality for native taxa?                    | Yes | They have ability to fine filter the water and also they grow very fast and can form dense populations, they are versatile in terms of feeding and this can often lead to habitat alterations and disruption of food webs and nutrient cycles in new invaded ecosystems (Milstein et al. 1988; Cooke et al. 2009; Gozlan et al. 2010; Ma et al. 2010; Rosemberg et al. 2010) | High      |
| 25                              | 4.12 | Is the taxon likely to maintain a viable population even when present in low densities (or persisting in adverse conditions by way of a dormant form)?                       | Yes | depending on the water and weather conditions                                                                                                                                                                                                                                                                                                                                | Medium    |
| <b>5. Resource exploitation</b> |      |                                                                                                                                                                              |     |                                                                                                                                                                                                                                                                                                                                                                              |           |
| 26                              | 5.01 | Is the taxon likely to consume threatened or protected native taxa in the RA area?                                                                                           | No  | Not known                                                                                                                                                                                                                                                                                                                                                                    | Medium    |
| 27                              | 5.02 | Is the taxon likely to sequester food resources (including nutrients) to the detriment of native taxa in the RA area?                                                        | Yes | It is possible                                                                                                                                                                                                                                                                                                                                                               | Medium    |
| <b>6. Reproduction</b>          |      |                                                                                                                                                                              |     |                                                                                                                                                                                                                                                                                                                                                                              |           |
| 28                              | 6.01 | Is the taxon likely to exhibit parental care and/or to reduce age-at-maturity in response to environmental conditions?                                                       | No  | No does not exhibit parental care                                                                                                                                                                                                                                                                                                                                            | Very high |
| 29                              | 6.02 | Is the taxon likely to produce viable gametes or propagules (in the RA area)?                                                                                                | No  | No. climate is not suitable                                                                                                                                                                                                                                                                                                                                                  | Very high |
| 30                              | 6.03 | Is the taxon likely to hybridise naturally with native taxa?                                                                                                                 | No  | No. Can not hibridize with native taxa. Own assumption.                                                                                                                                                                                                                                                                                                                      | Very high |
| 31                              | 6.04 | Is the taxon likely to be hermaphroditic or to display asexual reproduction?                                                                                                 | No  | No. <a href="https://fishbase.mnhn.fr/summary/Ctenopharyngodon-idella.html">https://fishbase.mnhn.fr/summary/Ctenopharyngodon-idella.html</a>                                                                                                                                                                                                                                | Very high |
| 32                              | 6.05 | Is the taxon dependent on the presence of another taxon (or specific habitat features) to complete its life cycle?                                                           | No  | No                                                                                                                                                                                                                                                                                                                                                                           | Very high |
| 33                              | 6.06 | Is the taxon known (or likely) to produce a large number of propagules or offspring within a short time span (e.g. < 1 year)?                                                | Yes | can produce 1.5 million eggs per season                                                                                                                                                                                                                                                                                                                                      | Very high |
| 34                              | 6.07 | How many time units (days, months, years) does the taxon require to reach the age-at-first-reproduction?                                                                     | 5   | 5-6 years                                                                                                                                                                                                                                                                                                                                                                    | Very high |
| <b>7. Dispersal mechanisms</b>  |      |                                                                                                                                                                              |     |                                                                                                                                                                                                                                                                                                                                                                              |           |
| 35                              | 7.01 | How many potential internal vectors/pathways could the taxon use to disperse within the RA area (with suitable)                                                              | >1  | Aquaculture and recreational fisheries                                                                                                                                                                                                                                                                                                                                       | Very high |
| 36                              | 7.02 | Will any of these vectors/pathways bring the taxon in close proximity to one or more protected areas (e.g. MCZ, MPA, SSSI)?                                                  | Yes | Yes. it is used for aquaculture and recreational fisheries which allows them to be brought to these places                                                                                                                                                                                                                                                                   | High      |
| 37                              | 7.03 | Does the taxon have a means of actively attaching itself to hard substrata (e.g. ship hulls, pilings, buoys) such that it enhances the likelihood of dispersal?              | No  | No. it does not have.                                                                                                                                                                                                                                                                                                                                                        | Very high |
| 38                              | 7.04 | Is natural dispersal of the taxon likely to occur as eggs (for animals) or as propagules (for plants: seeds, spores) in the RA area?                                         | No  | No. Because does not reproduce in RA                                                                                                                                                                                                                                                                                                                                         | Very high |
| 39                              | 7.05 | Is natural dispersal of the taxon likely to occur as larvae/juveniles (for animals) or as fragments/seedlings (for plants) in the RA area?                                   | No  | They do not produce viable gametes and therefore can be distributed by larvae, or juveniles.                                                                                                                                                                                                                                                                                 | Very high |
| 40                              | 7.06 | Are older life stages of the taxon likely to migrate in the RA area for reproduction?                                                                                        | No  | Do not reproduce therefore, does not migrate.                                                                                                                                                                                                                                                                                                                                | Very high |
| 41                              | 7.07 | Are propagules or eggs of the taxon likely to be dispersed in the RA area by other animals?                                                                                  | No  | No. can not be dispersed by other animals                                                                                                                                                                                                                                                                                                                                    | Very high |
| 42                              | 7.08 | Is dispersal of the taxon along any of the vectors/pathways mentioned in the previous seven questions (35-41; i.e. both unintentional or intentional) likely to be           | Yes | Yes it seems very rapid                                                                                                                                                                                                                                                                                                                                                      | Very high |
| 43                              | 7.09 | Is dispersal of the taxon density dependent?                                                                                                                                 | Yes | it is possible                                                                                                                                                                                                                                                                                                                                                               | High      |
| <b>8. Tolerance attributes</b>  |      |                                                                                                                                                                              |     |                                                                                                                                                                                                                                                                                                                                                                              |           |
| 44                              | 8.01 | Is the taxon able to withstand being out of water for extended periods (e.g. minimum of one or more hours) at some stage of its life cycle?                                  | No  | No indormation                                                                                                                                                                                                                                                                                                                                                               | Low       |
| 45                              | 8.02 | Is the taxon tolerant of a wide range of water quality conditions relevant to that taxon? [In the Justification field, indicate the relevant water quality variable(s) being | Yes | "Tolerant of a wide range of temperatures from 0° to 38°C, and salinities to as much as 10 ppt and oxygen levels down to 0.5 ppm." <a href="https://www.fishbase.se/summary/Ctenopharyngodon-idella.html">https://www.fishbase.se/summary/Ctenopharyngodon-idella.html</a>                                                                                                   | Medium    |
| 46                              | 8.03 | Can the taxon be controlled or eradicated in the wild with chemical, biological, or other agents/means?                                                                      | Yes | it is possible                                                                                                                                                                                                                                                                                                                                                               | Medium    |

|                          |      |                                                                                                                                                              |           |                                                                                                                                                                                                                                                      |           |
|--------------------------|------|--------------------------------------------------------------------------------------------------------------------------------------------------------------|-----------|------------------------------------------------------------------------------------------------------------------------------------------------------------------------------------------------------------------------------------------------------|-----------|
| 47                       | 8.04 | Is the taxon likely to tolerate or benefit from environmental/human disturbance?                                                                             | No        | No information, probably not                                                                                                                                                                                                                         | Low       |
| 48                       | 8.05 | Is the taxon able to tolerate salinity levels that are higher or lower than those found in its usual environment?                                            | No        | No. <a href="https://fishbase.mnhn.fr/summary/Ctenopharyngodon-idella.html">https://fishbase.mnhn.fr/summary/Ctenopharyngodon-idella.html</a>                                                                                                        | Very high |
| 49                       | 8.06 | Are there effective natural enemies (predators) of the taxon present in the RA                                                                               | No        | No. No effective natural enemies present in RA area                                                                                                                                                                                                  | Very high |
| <b>C. Climate change</b> |      |                                                                                                                                                              |           |                                                                                                                                                                                                                                                      |           |
| <b>9. Climate change</b> |      |                                                                                                                                                              |           |                                                                                                                                                                                                                                                      |           |
| 50                       | 9.01 | Under the predicted future climatic conditions, are the risks of entry into the RA area posed by the taxon likely to increase, decrease or not change?       | Increase  | It was hypothesized that climate change might alert the mechanisms of transportation and introduction of non-native species. Commercial and recreational activities will increase, that itself increases the propagule pressure levels of non-native | Very high |
| 51                       | 9.02 | Under the predicted future climatic conditions, are the risks of establishment posed by the taxon likely to increase, decrease or not change?                | Increase  | if the temperatures increase, it will make their populations able to reproduce independently, therefore the risk of their potential impact is increasing Dispersal might increase                                                                    | High      |
| 52                       | 9.03 | Under the predicted future climatic conditions, are the risks of dispersal within the RA area posed by the taxon likely to increase, decrease or not change? | Increase  | It could be higher. Because it is known that they create dance populations when they reproduce in new environments and creating problems for the native species                                                                                      | High      |
| 53                       | 9.04 | Under the predicted future climatic conditions, what is the likely magnitude of future potential impacts on biodiversity and/or ecological integrity/status? | Higher    | The magnitude of future potential impact on ecosystem structure and function is increasing                                                                                                                                                           | High      |
| 54                       | 9.05 | Under the predicted future climatic conditions, what is the likely magnitude of future potential impacts on ecosystem structure and/or function?             | No change | No change                                                                                                                                                                                                                                            | Medium    |
| 55                       | 9.06 | Under the predicted future climatic conditions, what is the likely magnitude of future potential impacts on ecosystem services/socio-economic factors?       | No change | No change                                                                                                                                                                                                                                            | Medium    |

| Statistics                                     |             |
|------------------------------------------------|-------------|
| Scores                                         |             |
| <b>BRA</b>                                     | <b>23.5</b> |
| <b>BRA Outcome</b>                             | <b>-</b>    |
| <b>BRA+CCA</b>                                 | <b>31.5</b> |
| <b>BRA+CCA Outcome</b>                         | <b>-</b>    |
| Score partition                                |             |
| <b>A. Biogeography/Historical</b>              | <b>16.5</b> |
| 1. Domestication/Cultivation                   | 4.0         |
| 2. Climate, distribution and introduction risk | 2.0         |
| 3. Invasive elsewhere                          | 10.5        |
| <b>B. Biology/Ecology</b>                      | <b>7.0</b>  |
| 4. Undesirable (or persistence) traits         | 9.0         |
| 5. Resource exploitation                       | 2.0         |
| 6. Reproduction                                | -1.0        |
| 7. Dispersal mechanisms                        | -1.0        |
| 8. Tolerance attributes                        | -2.0        |
| <b>C. Climate change</b>                       | <b>8.0</b>  |
| 9. Climate change                              | 8.0         |
| Answered Questions                             |             |
| <b>Total</b>                                   | <b>55</b>   |
| <b>A. Biogeography/Historical</b>              | <b>13</b>   |
| 1. Domestication/Cultivation                   | 3           |
| 2. Climate, distribution and introduction risk | 5           |
| 3. Invasive elsewhere                          | 5           |
| <b>B. Biology/Ecology</b>                      | <b>36</b>   |
| 4. Undesirable (or persistence) traits         | 12          |
| 5. Resource exploitation                       | 2           |
| 6. Reproduction                                | 7           |
| 7. Dispersal mechanisms                        | 9           |
| 8. Tolerance attributes                        | 6           |
| <b>C. Climate change</b>                       | <b>6</b>    |
| 9. Climate change                              | 6           |
| Sectors affected                               |             |
| <b>Commercial</b>                              | <b>13</b>   |
| <b>Environmental</b>                           | <b>9</b>    |
| <b>Species or population nuisance traits</b>   | <b>15</b>   |

| Thresholds     |             |
|----------------|-------------|
| <b>BRA</b>     | <b>-</b>    |
| <b>BRA+CCA</b> | <b>-</b>    |
| Confidence     |             |
| <b>BRA+CCA</b> | <b>0.77</b> |
| <b>BRA</b>     | <b>0.78</b> |
| <b>CCA</b>     | <b>0.71</b> |

| Date and Time       |  |
|---------------------|--|
| 20/05/2022 16:43:40 |  |



AS-ISK v2

| Taxon and Assessor details         |                                                                                                                               |
|------------------------------------|-------------------------------------------------------------------------------------------------------------------------------|
| Category                           | Fishes and Lampreys (freshwater)                                                                                              |
| Taxon name                         | <i>Gambusia holbrooki</i>                                                                                                     |
| Common name                        | eastern mosquitofish                                                                                                          |
| Assessor                           | Bella Japoshvili                                                                                                              |
| Risk screening context             |                                                                                                                               |
| Reason and socio-economic benefits | The species have been introduced in Georgia and later on introduced/spread over the South                                     |
| Risk assessment area               | South Caucasus                                                                                                                |
| Taxonomy                           | Actinopteri (ray-finned fishes) > Cyprinodontiformes (Rivulines, killifishes and live bearers)                                |
| Native range                       | North America                                                                                                                 |
| Introduced range                   | Worldwide                                                                                                                     |
| URL                                | <a href="https://www.fishbase.de/summary/Gambusia-holbrooki.html">https://www.fishbase.de/summary/Gambusia-holbrooki.html</a> |

|                                                |      |                                                                                                                                                                         | Response | Justification (references and/or other information)                                                                                                                                                                                                                                                                 | Confidence |
|------------------------------------------------|------|-------------------------------------------------------------------------------------------------------------------------------------------------------------------------|----------|---------------------------------------------------------------------------------------------------------------------------------------------------------------------------------------------------------------------------------------------------------------------------------------------------------------------|------------|
| A. Biogeography/Historical                     |      |                                                                                                                                                                         |          |                                                                                                                                                                                                                                                                                                                     |            |
| 1. Domestication/Cultivation                   |      |                                                                                                                                                                         |          |                                                                                                                                                                                                                                                                                                                     |            |
| 1                                              | 1.01 | Has the taxon been the subject of domestication (or cultivation) for at least 20 generations?                                                                           | No       | No such information is available                                                                                                                                                                                                                                                                                    | High       |
| 2                                              | 1.02 | Is the taxon harvested in the wild and likely to be sold or used in its live form?                                                                                      | No       | No such fact is known                                                                                                                                                                                                                                                                                               | Medium     |
| 3                                              | 1.03 | Does the taxon have invasive races, varieties, sub-taxa or congeners?                                                                                                   | Yes      | Congener                                                                                                                                                                                                                                                                                                            | Very high  |
| 2. Climate, distribution and introduction risk |      |                                                                                                                                                                         |          |                                                                                                                                                                                                                                                                                                                     |            |
| 4                                              | 2.01 | How similar are the climatic conditions of the Risk Assessment (RA) area and the taxon's native range?                                                                  | High     | Result of climatch algorithm                                                                                                                                                                                                                                                                                        | Medium     |
| 5                                              | 2.02 | What is the quality of the climate matching data?                                                                                                                       | Low      | Due to low accuracy of local climate data                                                                                                                                                                                                                                                                           | High       |
| 6                                              | 2.03 | Is the taxon already present outside of captivity in the RA area?                                                                                                       | Yes      | CABI, 2021. <i>Gambusia holbrooki</i> (eastern mosquitofish). <a href="https://www.cabi.org/isc/datasheet/82089">https://www.cabi.org/isc/datasheet/82089</a> (accessed November 2021)                                                                                                                              | Very high  |
| 7                                              | 2.04 | How many potential vectors could the taxon use to enter in the RA area?                                                                                                 | One      | Human mediated translocation for mosquito control.                                                                                                                                                                                                                                                                  | Very high  |
| 8                                              | 2.05 | Is the taxon currently found in close proximity to, and likely to enter into, the RA area in the near future (e.g. unintentional and intentional introductions)?        | Yes      | Kuljanishvili, T., Mumladze, L., Japoshvili, B., Mustafayev, N., Ibrahimov, S., Patoka, J., ... & Kalous, L. (2021). The first unified inventory of non-native fishes of the South Caucasian countries, Armenia, Azerbaijan, and Georgia. <i>Knowledge &amp; Management of Aquatic Ecosystems</i> , (422). 32.      | Very high  |
| 3. Invasive elsewhere                          |      |                                                                                                                                                                         |          |                                                                                                                                                                                                                                                                                                                     |            |
| 9                                              | 3.01 | Has the taxon become naturalised (established viable populations) outside its native range?                                                                             | Yes      | e.g. Kuljanishvili, T., Mumladze, L., Japoshvili, B., Mustafayev, N., Ibrahimov, S., Patoka, J., ... & Kalous, L. (2021). The first unified inventory of non-native fishes of the South Caucasian countries, Armenia, Azerbaijan, and Georgia. <i>Knowledge &amp; Management of Aquatic Ecosystems</i> , (422). 32. | Very high  |
| 10                                             | 3.02 | In the taxon's introduced range, are there known adverse impacts to wild stocks or commercial taxa?                                                                     | Yes      | Hurlbert, S. H., Zedler, J., & Fairbanks, D. (1972). Ecosystem alteration by mosquitofish ( <i>Gambusia affinis</i> ) predation. <i>Science</i> , 175(4022), 639-641.                                                                                                                                               | Very high  |
| 11                                             | 3.03 | In the taxon's introduced range, are there known adverse impacts to aquaculture?                                                                                        | No       | No documented evidence                                                                                                                                                                                                                                                                                              | Low        |
| 12                                             | 3.04 | In the taxon's introduced range, are there known adverse impacts to ecosystem services?                                                                                 | Yes      | Hurlbert, S. H., Zedler, J., & Fairbanks, D. (1972). Ecosystem alteration by mosquitofish ( <i>Gambusia affinis</i> ) predation. <i>Science</i> , 175(4022), 639-641.                                                                                                                                               | Medium     |
| 13                                             | 3.05 | In the taxon's introduced range, are there known adverse socio-economic impacts?                                                                                        | Yes      | Hurlbert, S. H., Zedler, J., & Fairbanks, D. (1972). Ecosystem alteration by mosquitofish ( <i>Gambusia affinis</i> ) predation. <i>Science</i> , 175(4022), 639-641.                                                                                                                                               | Medium     |
| B. Biology/Ecology                             |      |                                                                                                                                                                         |          |                                                                                                                                                                                                                                                                                                                     |            |
| 4. Undesirable (or persistence) traits         |      |                                                                                                                                                                         |          |                                                                                                                                                                                                                                                                                                                     |            |
| 14                                             | 4.01 | Is it likely that the taxon will be poisonous or pose other risks to human health?                                                                                      | No       | Not a harmful species                                                                                                                                                                                                                                                                                               | Very high  |
| 15                                             | 4.02 | Is it likely that the taxon will smother one or more native taxa (that are not threatened or protected)?                                                                | Yes      | By predation of eggs (Myers, G. S. (1965). <i>Gambusia</i> , the fish destroyer. <i>Tropical Fish Hobbyist</i> , 13(5), 31-32.)                                                                                                                                                                                     | Very high  |
| 16                                             | 4.03 | Are there any threatened or protected taxa that the non-native taxon would parasitise in the RA area?                                                                   | Yes      | There are number of threatend or species in the RA area that can be altered by the species                                                                                                                                                                                                                          | Very high  |
| 17                                             | 4.04 | Is the taxon adaptable in terms of climatic and other environmental conditions, thus enhancing its potential persistence if it has invaded or could invade the RA area? | Yes      | Pyke, G. H. (2005). A review of the biology of <i>Gambusia affinis</i> and <i>G. holbrooki</i> . <i>Reviews in Fish Biology and Fisheries</i> , 15(4), 339-365.                                                                                                                                                     | Medium     |
| 18                                             | 4.05 | Is the taxon likely to disrupt food-web structure/function in aquatic ecosystems if it has invaded or is likely to invade the RA area?                                  | Yes      | Hurlbert, S. H., Zedler, J., & Fairbanks, D. (1972). Ecosystem alteration by mosquitofish ( <i>Gambusia affinis</i> ) predation. <i>Science</i> , 175(4022), 639-641.                                                                                                                                               | High       |
| 19                                             | 4.06 | Is the taxon likely to exert adverse impacts on ecosystem services in the RA area?                                                                                      | Yes      | Hurlbert, S. H., Zedler, J., & Fairbanks, D. (1972). Ecosystem alteration by mosquitofish ( <i>Gambusia affinis</i> ) predation. <i>Science</i> , 175(4022), 639-641.                                                                                                                                               | Medium     |
| 20                                             | 4.07 | Is it likely that the taxon will host, and/or act as a vector for, recognised pests and infectious agents that are endemic in the RA area?                              | No       | Not known, and not expected based on personal experience                                                                                                                                                                                                                                                            | Low        |

|                                 |      |                                                                                                                                                                                           |     |                                                                                                                                                                                                                                                                                                                                                                                                                                                                   |           |
|---------------------------------|------|-------------------------------------------------------------------------------------------------------------------------------------------------------------------------------------------|-----|-------------------------------------------------------------------------------------------------------------------------------------------------------------------------------------------------------------------------------------------------------------------------------------------------------------------------------------------------------------------------------------------------------------------------------------------------------------------|-----------|
| 21                              | 4.08 | Is it likely that the taxon will host, and/or act as a vector for, recognised pests and infectious agents that are absent from (novel to) the RA area?                                    | Yes | Davis, J. R., & Huffman, D. G. (1977). A comparison of the helminth parasites of <i>Gambusia affinis</i> and <i>Gambusia geiseri</i> (Osteichthyes: Poeciliidae) from the upper San Marcos River. The Southwestern Naturalist, 359-366.; Tobler, M., & Schlupp, I. (2008). Influence of black spot disease on shoaling behaviour in female western mosquitofish, <i>Gambusia affinis</i> (Poeciliidae, Teleostei). Environmental Biology of Fishes, 81(1), 29-34. | High      |
| 22                              | 4.09 | Is it likely that the taxon will achieve a body size that will make it more likely to be released from captivity?                                                                         | No  | It is generally a small bodied species                                                                                                                                                                                                                                                                                                                                                                                                                            | Very high |
| 23                              | 4.10 | Is the taxon capable of sustaining itself in a range of water velocity conditions (e.g. versatile in habitat use)?                                                                        | Yes | Pyke, G. H. (2005). A review of the biology of <i>Gambusia affinis</i> and <i>G. holbrooki</i> . Reviews in Fish Biology and Fisheries, 15(4), 339-365.                                                                                                                                                                                                                                                                                                           | High      |
| 24                              | 4.11 | Is it likely that the taxon's mode of existence (e.g. excretion of by-products) or behaviours (e.g. feeding) will reduce habitat quality for native taxa?                                 | Yes | Hurlbert, S. H., Zedler, J., & Fairbanks, D. (1972). Ecosystem alteration by mosquitofish ( <i>Gambusia affinis</i> ) predation. Science, 175(4022), 639-641.                                                                                                                                                                                                                                                                                                     | High      |
| 25                              | 4.12 | Is the taxon likely to maintain a viable population even when present in low densities (or persisting in adverse conditions by way of a dormant form)?                                    | Yes | No documented evidence, professional judgement                                                                                                                                                                                                                                                                                                                                                                                                                    | Low       |
| <b>5. Resource exploitation</b> |      |                                                                                                                                                                                           |     |                                                                                                                                                                                                                                                                                                                                                                                                                                                                   |           |
| 26                              | 5.01 | Is the taxon likely to consume threatened or protected native taxa in the RA area?                                                                                                        | Yes | At the egg/larval stage                                                                                                                                                                                                                                                                                                                                                                                                                                           | Medium    |
| 27                              | 5.02 | Is the taxon likely to sequester food resources (including nutrients) to the detriment of native taxa in the RA area?                                                                     | Yes | Hurlbert, S. H., Zedler, J., & Fairbanks, D. (1972). Ecosystem alteration by mosquitofish ( <i>Gambusia affinis</i> ) predation. Science, 175(4022), 639-641.                                                                                                                                                                                                                                                                                                     | Medium    |
| <b>6. Reproduction</b>          |      |                                                                                                                                                                                           |     |                                                                                                                                                                                                                                                                                                                                                                                                                                                                   |           |
| 28                              | 6.01 | Is the taxon likely to exhibit parental care and/or to reduce age-at-maturity in response to environmental conditions?                                                                    | No  | Pyke, G. H. (2005). A review of the biology of <i>Gambusia affinis</i> and <i>G. holbrooki</i> . Reviews in Fish Biology and Fisheries, 15(4), 339-365.                                                                                                                                                                                                                                                                                                           | High      |
| 29                              | 6.02 | Is the taxon likely to produce viable gametes or propagules (in the RA area)?                                                                                                             | Yes | The species is surviving for many decades in the RA area                                                                                                                                                                                                                                                                                                                                                                                                          | Very high |
| 30                              | 6.03 | Is the taxon likely to hybridise naturally with native taxa?                                                                                                                              | No  | No such fact is known or expected                                                                                                                                                                                                                                                                                                                                                                                                                                 | Very high |
| 31                              | 6.04 | Is the taxon likely to be hermaphroditic or to display asexual reproduction?                                                                                                              | No  | Pyke, G. H. (2005). A review of the biology of <i>Gambusia affinis</i> and <i>G. holbrooki</i> . Reviews in Fish Biology and Fisheries, 15(4), 339-365.                                                                                                                                                                                                                                                                                                           | High      |
| 32                              | 6.05 | Is the taxon dependent on the presence of another taxon (or specific habitat features) to complete its life cycle?                                                                        | No  | It can complete its life cycle without any fishes                                                                                                                                                                                                                                                                                                                                                                                                                 | Very high |
| 33                              | 6.06 | Is the taxon known (or likely) to produce a large number of propagules or offspring within a short time span (e.g. < 1 year)?                                                             | Yes | Page, L.M. and B.M. Burr, 1991. A field guide to freshwater fishes of North America north of Mexico. Houghton Mifflin Company, Boston.                                                                                                                                                                                                                                                                                                                            | Very high |
| 34                              | 6.07 | How many time units (days, months, years) does the taxon require to reach the age-at-first-reproduction?                                                                                  | 3   | Week                                                                                                                                                                                                                                                                                                                                                                                                                                                              | Very high |
| <b>7. Dispersal mechanisms</b>  |      |                                                                                                                                                                                           |     |                                                                                                                                                                                                                                                                                                                                                                                                                                                                   |           |
| 35                              | 7.01 | How many potential internal vectors/pathways could the taxon use to disperse within the RA area (with suitable vectors)?                                                                  | One | Unintentional translocation                                                                                                                                                                                                                                                                                                                                                                                                                                       | High      |
| 36                              | 7.02 | Will any of these vectors/pathways bring the taxon in close proximity to one or more protected areas (e.g. MCZ, MPA, SSSI)?                                                               | Yes | It is already widespread in several parts of RA area                                                                                                                                                                                                                                                                                                                                                                                                              | Medium    |
| 37                              | 7.03 | Does the taxon have a means of actively attaching itself to hard substrata (e.g. ship hulls, pilings, buoys) such that it enhances the likelihood of dispersal?                           | No  | No such evidence is known                                                                                                                                                                                                                                                                                                                                                                                                                                         | Very high |
| 38                              | 7.04 | Is natural dispersal of the taxon likely to occur as eggs (for animals) or as propagules (for plants: seeds, spores) in the RA area?                                                      | No  | No documented evidence exists                                                                                                                                                                                                                                                                                                                                                                                                                                     | Medium    |
| 39                              | 7.05 | Is natural dispersal of the taxon likely to occur as larvae/juveniles (for animals) or as fragments/seedlings (for plants) in the RA area?                                                | Yes | The species can easily disperse through water currents naturally at the juvenile stage                                                                                                                                                                                                                                                                                                                                                                            | Low       |
| 40                              | 7.06 | Are older life stages of the taxon likely to migrate in the RA area for reproduction?                                                                                                     | No  | Species does not require migration for reproduction                                                                                                                                                                                                                                                                                                                                                                                                               | High      |
| 41                              | 7.07 | Are propagules or eggs of the taxon likely to be dispersed in the RA area by other animals?                                                                                               | No  | No such fact is known                                                                                                                                                                                                                                                                                                                                                                                                                                             | High      |
| 42                              | 7.08 | Is dispersal of the taxon along any of the vectors/pathways mentioned in the previous seven questions (35-41; i.e. both unintentional or intentional) likely to be?                       | Yes | Due to large population density, the unintentional translocation or dispersal through water current can be very intensive                                                                                                                                                                                                                                                                                                                                         | Medium    |
| 43                              | 7.09 | Is dispersal of the taxon density dependent?                                                                                                                                              | No  | No such fact is known                                                                                                                                                                                                                                                                                                                                                                                                                                             | Medium    |
| <b>8. Tolerance attributes</b>  |      |                                                                                                                                                                                           |     |                                                                                                                                                                                                                                                                                                                                                                                                                                                                   |           |
| 44                              | 8.01 | Is the taxon able to withstand being out of water for extended periods (e.g. minimum of one or more hours) at some stage of its life cycle?                                               | No  | Usually daisy quickly out of water                                                                                                                                                                                                                                                                                                                                                                                                                                | High      |
| 45                              | 8.02 | Is the taxon tolerant of a wide range of water quality conditions relevant to that taxon? [In the Justification field, indicate the relevant water quality variable(s) being tolerant of] | Yes | Low oxygen, high temperature, turbidity                                                                                                                                                                                                                                                                                                                                                                                                                           | High      |
| 46                              | 8.03 | Can the taxon be controlled or eradicated in the wild with chemical, biological, or other agents/means?                                                                                   | No  | No successful cases                                                                                                                                                                                                                                                                                                                                                                                                                                               | High      |

|                          |      |                                                                                                                                                              |           |                                                                                                                                                                                                      |        |
|--------------------------|------|--------------------------------------------------------------------------------------------------------------------------------------------------------------|-----------|------------------------------------------------------------------------------------------------------------------------------------------------------------------------------------------------------|--------|
| 47                       | 8.04 | Is the taxon likely to tolerate or benefit from environmental/human disturbance?                                                                             | No        | Not known, no documented evidence exists                                                                                                                                                             | Medium |
| 48                       | 8.05 | Is the taxon able to tolerate salinity levels that are higher or lower than those found in its usual environment?                                            | Yes       | Alcaraz, C., & García-Berthou, E. (2007). Life history variation of invasive mosquitofish ( <i>Gambusia holbrooki</i> ) along a salinity gradient. <i>Biological Conservation</i> , 139(1-2), 83-92. | High   |
| 49                       | 8.06 | Are there effective natural enemies (predators) of the taxon present in the RA                                                                               | No        | Not known effective natural enemies from the RA area                                                                                                                                                 | High   |
| <b>C. Climate change</b> |      |                                                                                                                                                              |           |                                                                                                                                                                                                      |        |
| <b>9. Climate change</b> |      |                                                                                                                                                              |           |                                                                                                                                                                                                      |        |
| 50                       | 9.01 | Under the predicted future climatic conditions, are the risks of entry into the RA area posed by the taxon likely to increase, decrease or not change?       | No change | Professional judgement. The species is already in RA area with no new introduction events                                                                                                            | High   |
| 51                       | 9.02 | Under the predicted future climatic conditions, are the risks of establishment posed by the taxon likely to increase, decrease or not change?                | Increase  | Professional judgement. Expected to increase since the species prefers warm waters in RA area                                                                                                        | Medium |
| 52                       | 9.03 | Under the predicted future climatic conditions, are the risks of dispersal within the RA area posed by the taxon likely to increase, decrease or not change? | Increase  | Professional judgement                                                                                                                                                                               | Medium |
| 53                       | 9.04 | Under the predicted future climatic conditions, what is the likely magnitude of future potential impacts on biodiversity and/or ecological integrity/status? | Higher    | Professional judgement. I expect to increase its realized area as well as density thus would have larger impact                                                                                      | Medium |
| 54                       | 9.05 | Under the predicted future climatic conditions, what is the likely magnitude of future potential impacts on ecosystem structure and/or function?             | Higher    | Professional judgement. I expect to increase its realized area as well as density thus would have larger impact                                                                                      | Medium |
| 55                       | 9.06 | Under the predicted future climatic conditions, what is the likely magnitude of future potential impacts on ecosystem services/socio-economic factors?       | Higher    | Professional judgement. I expect to increase its realized area as well as density thus would have larger impact                                                                                      | Medium |

| Statistics                                     |             |
|------------------------------------------------|-------------|
| Scores                                         |             |
| <b>BRA</b>                                     | <b>34.0</b> |
| <b>BRA Outcome</b>                             | -           |
| <b>BRA+CCA</b>                                 | <b>44.0</b> |
| <b>BRA+CCA Outcome</b>                         | -           |
| Score partition                                |             |
| <b>A. Biogeography/Historical</b>              | <b>15.0</b> |
| 1. Domestication/Cultivation                   | 0.0         |
| 2. Climate, distribution and introduction risk | 1.0         |
| 3. Invasive elsewhere                          | 14.0        |
| <b>B. Biology/Ecology</b>                      | <b>19.0</b> |
| 4. Undesirable (or persistence) traits         | 9.0         |
| 5. Resource exploitation                       | 7.0         |
| 6. Reproduction                                | 1.0         |
| 7. Dispersal mechanisms                        | -1.0        |
| 8. Tolerance attributes                        | 3.0         |
| <b>C. Climate change</b>                       | <b>10.0</b> |
| 9. Climate change                              | 10.0        |
| Answered Questions                             |             |
| <b>Total</b>                                   | <b>55</b>   |
| <b>A. Biogeography/Historical</b>              | <b>13</b>   |
| 1. Domestication/Cultivation                   | 3           |
| 2. Climate, distribution and introduction risk | 5           |
| 3. Invasive elsewhere                          | 5           |
| <b>B. Biology/Ecology</b>                      | <b>36</b>   |
| 4. Undesirable (or persistence) traits         | 12          |
| 5. Resource exploitation                       | 2           |
| 6. Reproduction                                | 7           |
| 7. Dispersal mechanisms                        | 9           |
| 8. Tolerance attributes                        | 6           |
| <b>C. Climate change</b>                       | <b>6</b>    |
| 9. Climate change                              | 6           |
| Sectors affected                               |             |
| <b>Commercial</b>                              | <b>11</b>   |
| <b>Environmental</b>                           | <b>17</b>   |
| <b>Species or population nuisance traits</b>   | <b>19</b>   |

| Thresholds     |             |
|----------------|-------------|
| <b>BRA</b>     | -           |
| <b>BRA+CCA</b> | -           |
| Confidence     |             |
| <b>BRA+CCA</b> | <b>0.70</b> |
| <b>BRA</b>     | <b>0.72</b> |
| <b>CCA</b>     | <b>0.54</b> |

| Date and Time       |
|---------------------|
| 16/05/2022 11:39:50 |

AS-ISK v2

| Taxon and Assessor details         |                                                                                                     |
|------------------------------------|-----------------------------------------------------------------------------------------------------|
| Category                           | Fishes and Lampreys (freshwater)                                                                    |
| Taxon name                         | <i>Gambusia holbrooki</i>                                                                           |
| Common name                        | eastern mosquitofish                                                                                |
| Assessor                           | Giorgi Epitashvili                                                                                  |
| Risk screening context             |                                                                                                     |
| Reason and socio-economic benefits | G. holbrooki is one of the widespread species. Its distribution was facilitated by human mostly for |
| Risk assessment area               | South Caucasus                                                                                      |
| Taxonomy                           | Gambusia holbrooki Girard 1859                                                                      |
| Native range                       | The native habitat of mosquitofish is the lowland ponds, lakes and streams of southern USA          |
| Introduced range                   | Introduced worldwide in tropical and subtropical countries. North America: Atlantic and Gulf Slope  |
| URL                                | <a href="https://www.fishbase.se/summary/4521">https://www.fishbase.se/summary/4521</a>             |

|                                                |      |                                                                                                                                                                         | Response | Justification (references and/or other information)                                                                                                                                                                                                                                                                                                                                                                                   | Confidence |
|------------------------------------------------|------|-------------------------------------------------------------------------------------------------------------------------------------------------------------------------|----------|---------------------------------------------------------------------------------------------------------------------------------------------------------------------------------------------------------------------------------------------------------------------------------------------------------------------------------------------------------------------------------------------------------------------------------------|------------|
| A. Biogeography/Historical                     |      |                                                                                                                                                                         |          |                                                                                                                                                                                                                                                                                                                                                                                                                                       |            |
| 1. Domestication/Cultivation                   |      |                                                                                                                                                                         |          |                                                                                                                                                                                                                                                                                                                                                                                                                                       |            |
| 1                                              | 1.01 | Has the taxon been the subject of domestication (or cultivation) for at least 20 generations?                                                                           | No       | G. holbrooki is small sized fish and is not an interesting object for aquaculture.                                                                                                                                                                                                                                                                                                                                                    | High       |
| 2                                              | 1.02 | Is the taxon harvested in the wild and likely to be sold or used in its live form?                                                                                      | No       | G. holbrooki is small sized fish and is not an interesting object for aquaculture.                                                                                                                                                                                                                                                                                                                                                    | High       |
| 3                                              | 1.03 | Does the taxon have invasive races, varieties, sub-taxa or congeners?                                                                                                   | Yes      | Gambusia holbrooki is a remarkably successful invader of freshwater systems worldwide, with the capacity to detrimentally impact native fishes both directly (e.g. competition, predation, agonistic interactions) and indirectly (e.g. triggering trophic cascades) (Macdonald et al. 2012).                                                                                                                                         | Very high  |
| 2. Climate, distribution and introduction risk |      |                                                                                                                                                                         |          |                                                                                                                                                                                                                                                                                                                                                                                                                                       |            |
| 4                                              | 2.01 | How similar are the climatic conditions of the Risk Assessment (RA) area and the taxon's native range?                                                                  | Medium   | Köppen-Geiger climate classification system                                                                                                                                                                                                                                                                                                                                                                                           | Medium     |
| 5                                              | 2.02 | What is the quality of the climate matching data?                                                                                                                       | Medium   | Köppen-Geiger climate classification system                                                                                                                                                                                                                                                                                                                                                                                           | Medium     |
| 6                                              | 2.03 | Is the taxon already present outside of captivity in the RA area?                                                                                                       | Yes      | This species is widely distributed in the SC region (Ninua et al. 2013; Kuljanishvili et al. 2020; Epitashvili et al. 2020).                                                                                                                                                                                                                                                                                                          | Very high  |
| 7                                              | 2.04 | How many potential vectors could the taxon use to enter in the RA area?                                                                                                 | One      | This species has spread in the Caucasus region intentionally by humans (Ninua et al. 2013).                                                                                                                                                                                                                                                                                                                                           | High       |
| 8                                              | 2.05 | Is the taxon currently found in close proximity to, and likely to enter into, the RA area in the near future (e.g. unintentional and intentional introductions)?        | Yes      | This species is widely distributed in Iran, Turkey and surrounding of the South Caucasus region (Patimar et al. 2011; Kurtul and Musa, 2020).                                                                                                                                                                                                                                                                                         | Very high  |
| 3. Invasive elsewhere                          |      |                                                                                                                                                                         |          |                                                                                                                                                                                                                                                                                                                                                                                                                                       |            |
| 9                                              | 3.01 | Has the taxon become naturalised (established viable populations) outside its                                                                                           | Yes      | This species has become naturalised in the most countries and regions outside of its native range.                                                                                                                                                                                                                                                                                                                                    | Very high  |
| 10                                             | 3.02 | In the taxon's introduced range, are there known adverse impacts to wild stocks or commercial taxa?                                                                     | Yes      | Because of their aggressive and predatory behavior, mosquitofish may negatively affect populations of small fish through predation and competition (Myers 1967; Courtenay and Meffe, 1989).                                                                                                                                                                                                                                           | Very high  |
| 11                                             | 3.03 | In the taxon's introduced range, are there known adverse impacts to aquaculture?                                                                                        | Yes      | There is no data however it is expected to have an impact                                                                                                                                                                                                                                                                                                                                                                             | Medium     |
| 12                                             | 3.04 | In the taxon's introduced range, are there known adverse impacts to ecosystem services?                                                                                 | Yes      | Pest fish including G. holbrooki may affect markets (e.g., changes in prices), and non-market attributes (e.g., changes in ecosystem services) (Rowe et al. 2008).                                                                                                                                                                                                                                                                    | High       |
| 13                                             | 3.05 | In the taxon's introduced range, are there known adverse socio-economic impacts?                                                                                        | Yes      | Alien pest fish are likely to affect people's way of life due to impacts on recreational fishing and commercial fishing industries. Some of the measurable likely impacts include impacts on recreational opportunities and impacts on employment (Rowe et                                                                                                                                                                            | High       |
| B. Biology/Ecology                             |      |                                                                                                                                                                         |          |                                                                                                                                                                                                                                                                                                                                                                                                                                       |            |
| 4. Undesirable (or persistence) traits         |      |                                                                                                                                                                         |          |                                                                                                                                                                                                                                                                                                                                                                                                                                       |            |
| 14                                             | 4.01 | Is it likely that the taxon will be poisonous or pose other risks to human health?                                                                                      | No       | This species does not pose a threat to humans                                                                                                                                                                                                                                                                                                                                                                                         | High       |
| 15                                             | 4.02 | Is it likely that the taxon will smother one or more native taxa (that are not threatened or protected)?                                                                | Yes      | Since their introduction into Australia in 1925 for the purpose of mosquito control, gambusia have become widespread in NSW, especially modified waterways, and are considered to be a contributing factor to the decline of frogs (threatened or otherwise) as well as other native species such as freshwater fishes and macro-invertebrates.                                                                                       | Medium     |
| 16                                             | 4.03 | Are there any threatened or protected taxa that the non-native taxon would parasitise in the RA area?                                                                   | Yes      | There are several threatened and protected species in the SC region which are likely to be under pressure from this species (Ninua et al. 2013, Kuljanishvili et al. 2020).                                                                                                                                                                                                                                                           | Very high  |
| 17                                             | 4.04 | Is the taxon adaptable in terms of climatic and other environmental conditions, thus enhancing its potential persistence if it has invaded or could invade the RA area? | Yes      | This species has been successfully established in the SC region which means that it has crossed these barriers.                                                                                                                                                                                                                                                                                                                       | High       |
| 18                                             | 4.05 | Is the taxon likely to disrupt food-web structure/function in aquatic ecosystems if it has invaded or is likely to invade the RA area?                                  | Yes      | Gambusia predation decreased markedly the overall abundance of zooplankton. Large crustaceans (Anostraca and Calanoida) were rapidly eliminated, while Cyclopoida and Cladocera peaked in March before in turn disappearing in the later stages of the hydroperiod. These results are congruent with the theory supporting the influence of both predation and competition as major interacting forces shaping freshwater communities | Very high  |
| 19                                             | 4.06 | Is the taxon likely to exert adverse impacts on ecosystem services in the RA area?                                                                                      | Yes      | G. holbrooki may affect markets (e.g., changes in prices), and non-market attributes (e.g., changes in ecosystem services) (Rowe et al. 2008).                                                                                                                                                                                                                                                                                        | Medium     |

|                                 |      |                                                                                                                                                                    |                |                                                                                                                                                                                                                                 |           |
|---------------------------------|------|--------------------------------------------------------------------------------------------------------------------------------------------------------------------|----------------|---------------------------------------------------------------------------------------------------------------------------------------------------------------------------------------------------------------------------------|-----------|
| 20                              | 4.07 | Is it likely that the taxon will host, and/or act as a vector for, recognised pests and infectious agents that are endemic in the RA                               | Not applicable | No research has been conducted in this regard                                                                                                                                                                                   | Low       |
| 21                              | 4.08 | Is it likely that the taxon will host, and/or act as a vector for, recognised pests and infectious agents that are absent from (novel to) the RA area?             | No             | No research has been conducted in this regard                                                                                                                                                                                   | Low       |
| 22                              | 4.09 | Is it likely that the taxon will achieve a body size that will make it more likely to be released from captivity?                                                  | No             | This fish is small sized and therefore is an uninteresting species for aquaculture                                                                                                                                              | High      |
| 23                              | 4.10 | Is the taxon capable of sustaining itself in a range of water velocity conditions (e.g. versatile in habitat use)?                                                 | No             | Adult mosquitofish specimens occur in standing to slow-flowing water, mostly in vegetated ponds and lakes, backwaters and quiet pools of steams (Page & Burr 1991)                                                              | High      |
| 24                              | 4.11 | Is it likely that the taxon's mode of existence (e.g. excretion of by-products) or behaviours (e.g. feeding) will reduce habitat quality for native taxa?          | Yes            | Degradation of the quality of water and natural habitat are a threat to this invasive species -- from the Atlantic coast in North America -- which competes against and moves local species away (Cano-Rocabayera et al. 2019). | Very high |
| 25                              | 4.12 | Is the taxon likely to maintain a viable population even when present in low densities (or persisting in adverse conditions by way of a dormant form)?             | Not applicable | No research has been conducted in this regard                                                                                                                                                                                   | Low       |
| <b>5. Resource exploitation</b> |      |                                                                                                                                                                    |                |                                                                                                                                                                                                                                 |           |
| 26                              | 5.01 | Is the taxon likely to consume threatened or protected native taxa in the RA area?                                                                                 | Not applicable | Such data is not available                                                                                                                                                                                                      | Low       |
| 27                              | 5.02 | Is the taxon likely to sequester food resources (including nutrients) to the detriment of native taxa in the RA area?                                              | Not applicable | No research has been conducted in this regard however, this species is likely to be a serious competitor to local fish.                                                                                                         | Low       |
| <b>6. Reproduction</b>          |      |                                                                                                                                                                    |                |                                                                                                                                                                                                                                 |           |
| 28                              | 6.01 | Is the taxon likely to exhibit parental care and/or to reduce age-at-maturity in response to environmental conditions?                                             | No             | No research has been conducted in this regard                                                                                                                                                                                   | Low       |
| 29                              | 6.02 | Is the taxon likely to produce viable gametes or propagules (in the RA area)?                                                                                      | Yes            | This species breeds in the South Caucasus region (Kuljanishvili et al. 2020).                                                                                                                                                   | Very high |
| 30                              | 6.03 | Is the taxon likely to hybridise naturally with native taxa?                                                                                                       | No             | Such fact has not been detected yet                                                                                                                                                                                             | High      |
| 31                              | 6.04 | Is the taxon likely to be hermaphroditic or to display asexual reproduction?                                                                                       | No             | Such fact has not been detected yet                                                                                                                                                                                             | Low       |
| 32                              | 6.05 | Is the taxon dependent on the presence of another taxon (or specific habitat features) to complete its life cycle?                                                 | No             | No research has been conducted in this regard                                                                                                                                                                                   | Low       |
| 33                              | 6.06 | Is the taxon known (or likely) to produce a large number of propagules or offspring within a short time span (e.g. < 1 year)?                                      | No             | G. holbrooki matures at 4-6 weeks; 3 generations can be produced in one year. Gestation lasts 3-4 weeks. Brood may reach up to 354 young, but is generally around 40-60 (Riehl and Baensch, 1991; Kottelat and Freyhof, 2007).  | Medium    |
| 34                              | 6.07 | How many time units (days, months, years) does the taxon require to reach the age-at-first-reproduction?                                                           | 1              | G. holbrooki matures at 4-6 weeks (Kottelat and Freyhof, 2007).                                                                                                                                                                 | Medium    |
| <b>7. Dispersal mechanisms</b>  |      |                                                                                                                                                                    |                |                                                                                                                                                                                                                                 |           |
| 35                              | 7.01 | How many potential internal vectors/pathways could the taxon use to disperse within the RA area (with suitable vectors/pathways)?                                  | >1             | Currently this species spreading within the SC by itself/or other animals (birds) (own observation).                                                                                                                            | Medium    |
| 36                              | 7.02 | Will any of these vectors/pathways bring the taxon in close proximity to one or more protected areas (e.g. MCZ, MPA, SSSI)?                                        | Yes            | G. holbrooki is distributed within the protected areas of the SC region, for instance in the Kolikheti National Park, Western Georgia (Own data).                                                                               | Very high |
| 37                              | 7.03 | Does the taxon have a means of actively attaching itself to hard substrata (e.g. ship hulls, pilings, buoys) such that it enhances the likelihood of dispersal?    | No             | Such a fact is not described                                                                                                                                                                                                    | Medium    |
| 38                              | 7.04 | Is natural dispersal of the taxon likely to occur as eggs (for animals) or as propagules (for plants: seeds, spores) in the RA area?                               | Yes            | This species should be propagated within the SC region with the help of other animals (birds, reptiles, etc.) (Own observation)                                                                                                 | Medium    |
| 39                              | 7.05 | Is natural dispersal of the taxon likely to occur as larvae/juveniles (for animals) or as fragments/seedlings (for plants) in the RA area?                         | Yes            | This species should be propagated within the SC region with the help of other animals (birds, reptiles, etc.) or move by water between waterbodies (Own observation)                                                            | Medium    |
| 40                              | 7.06 | Are older life stages of the taxon likely to migrate in the RA area for reproduction?                                                                              | No             | This species lives permanently in specific reservoirs and does not migrate.                                                                                                                                                     | Very high |
| 41                              | 7.07 | Are propagules or eggs of the taxon likely to be dispersed in the RA area by other animals?                                                                        | Yes            | This species should be propagated within the SC region with the help of other animals (birds, reptiles, etc.)                                                                                                                   | Medium    |
| 42                              | 7.08 | Is dispersal of the taxon along any of the vectors/pathways mentioned in the previous seven questions (35-41; i.e. both unintentional or intentional) likely to be | Yes            | Probably yes                                                                                                                                                                                                                    | Low       |
| 43                              | 7.09 | Is dispersal of the taxon density dependent?                                                                                                                       | Yes            | Probably yes                                                                                                                                                                                                                    | Low       |
| <b>8. Tolerance attributes</b>  |      |                                                                                                                                                                    |                |                                                                                                                                                                                                                                 |           |
| 44                              | 8.01 | Is the taxon able to withstand being out of water for extended periods (e.g. minimum of one or more hours) at some stage of its life cycle?                        | No             | Such a fact is not described                                                                                                                                                                                                    | Medium    |

|    |      |                                                                                                                                                                                           |     |                                                                                                                                                                                                                                                                                                                                                                                                                                                                                                                                                                                                                                                                                                                                                |           |
|----|------|-------------------------------------------------------------------------------------------------------------------------------------------------------------------------------------------|-----|------------------------------------------------------------------------------------------------------------------------------------------------------------------------------------------------------------------------------------------------------------------------------------------------------------------------------------------------------------------------------------------------------------------------------------------------------------------------------------------------------------------------------------------------------------------------------------------------------------------------------------------------------------------------------------------------------------------------------------------------|-----------|
| 45 | 8.02 | Is the taxon tolerant of a wide range of water quality conditions relevant to that taxon? [In the Justification field, indicate the relevant water quality variable(s) being considered.] | Yes | This study showed that <i>G. holbrooki</i> off drainage of Domat Al-Jandal Lake, KSA can tolerate abrupt changes in salinity, temperature and pH changes. The LC50 of salinity was 16 ‰. LC50 of lower and upper temperature on <i>G. holbrooki</i> were 3.5 and 36.5 °C when transferred abruptly from 22 °C. The LC50 of pH in acidity and alkalinity range were 3.5 and 11.5 respectively. From this study, it can be concluded that <i>G. holbrooki</i> can be used under different conditions of 15 ‰ salinity, range of pH from 4 to 11 and range of temperature from 4 to 35 °C for controlling mosquito if transferred abruptly without acclimatization (EL-Borav                                                                      | High      |
| 46 | 8.03 | Can the taxon be controlled or eradicated in the wild with chemical, biological, or other agents/means?                                                                                   | No  | Attempts have been made to eradicate <i>G. holbrooki</i> from water bodies using the fish poison rotenone. Most native fish are killed by a rotenone concentration of 0.5 ppm but <i>Gambusia</i> can survive this concentration without mortality (Pyke, 2005). Impacts on native fishes and other native fauna have been mitigated by releasing potassium permanganate downstream of the rotenone release point in flowing waterways. <i>Gambusia</i> is more tolerant of the organo-phosphorus pesticide Dursban™ than several native fishes (Pyke, 2005). These observations mean that chemical control methods are highly likely to affect native fish and other aquatic biota well before useful levels of <i>Gambusia</i> mortality can | High      |
| 47 | 8.04 | Is the taxon likely to tolerate or benefit from environmental/human disturbance?                                                                                                          | Yes | The inappropriate spread of <i>Gambusia</i> by humans for the purpose of mosquito control remains a problem in spite of repeated cautionary advice over the past 20 years (Arthington and Lloyd,                                                                                                                                                                                                                                                                                                                                                                                                                                                                                                                                               | Medium    |
| 48 | 8.05 | Is the taxon able to tolerate salinity levels that are higher or lower than those found in its usual environment?                                                                         | Yes | The broad salinity tolerance of mosquitofish allows them to colonise environments, such as salt lakes, estuaries, near coastal marine environments (Lloyd, 1987). The salinity LD50 for mosquitofish is more than 58g/L and they can tolerate direct transfers to salinity differences of up to seawater (35 g/L) with few mortalities (Chervinski, 1983).                                                                                                                                                                                                                                                                                                                                                                                     | High      |
| 49 | 8.06 | Are there effective natural enemies (predators) of the taxon present in the RA                                                                                                            | Yes | There are many predators which can eat <i>G. holbrooki</i> in the SC region (fish, reptiles, birds etc.)                                                                                                                                                                                                                                                                                                                                                                                                                                                                                                                                                                                                                                       | Very high |

#### C. Climate change

##### 9. Climate change

|    |      |                                                                                                                                                              |           |                 |     |
|----|------|--------------------------------------------------------------------------------------------------------------------------------------------------------------|-----------|-----------------|-----|
| 50 | 9.01 | Under the predicted future climatic conditions, are the risks of entry into the RA area posed by the taxon likely to increase, decrease or not change?       | Increase  | Own observation | Low |
| 51 | 9.02 | Under the predicted future climatic conditions, are the risks of establishment posed by the taxon likely to increase, decrease or not change?                | Increase  | Own observation | Low |
| 52 | 9.03 | Under the predicted future climatic conditions, are the risks of dispersal within the RA area posed by the taxon likely to increase, decrease or not change? | Increase  | Own observation | Low |
| 53 | 9.04 | Under the predicted future climatic conditions, what is the likely magnitude of future potential impacts on biodiversity and/or ecological integrity/status? | No change | Own observation | Low |
| 54 | 9.05 | Under the predicted future climatic conditions, what is the likely magnitude of future potential impacts on ecosystem structure and/or function?             | No change | Own observation | Low |
| 55 | 9.06 | Under the predicted future climatic conditions, what is the likely magnitude of future potential impacts on ecosystem services/socio-economic factors?       | No change | Own observation | Low |

| Statistics                                     |      |
|------------------------------------------------|------|
| Scores                                         |      |
| BRA                                            | 31.5 |
| BRA Outcome                                    | -    |
| BRA+CCA                                        | 37.5 |
| BRA+CCA Outcome                                | -    |
| Score partition                                |      |
| A. Biogeography/Historical                     | 14.5 |
| 1. Domestication/Cultivation                   | 0.0  |
| 2. Climate, distribution and introduction risk | 1.0  |
| 3. Invasive elsewhere                          | 13.5 |
| B. Biology/Ecology                             | 17.0 |
| 4. Undesirable (or persistence) traits         | 6.0  |
| 5. Resource exploitation                       | 0.0  |
| 6. Reproduction                                | 1.0  |
| 7. Dispersal mechanisms                        | 5.0  |
| 8. Tolerance attributes                        | 5.0  |
| C. Climate change                              | 6.0  |
| 9. Climate change                              | 6.0  |
| Answered Questions                             |      |
| Total                                          | 55   |
| A. Biogeography/Historical                     | 13   |
| 1. Domestication/Cultivation                   | 3    |
| 2. Climate, distribution and introduction risk | 5    |
| 3. Invasive elsewhere                          | 5    |
| B. Biology/Ecology                             | 36   |

|                                              |           |
|----------------------------------------------|-----------|
| 4. Undesirable (or persistence) traits       | 12        |
| 5. Resource exploitation                     | 2         |
| 6. Reproduction                              | 7         |
| 7. Dispersal mechanisms                      | 9         |
| 8. Tolerance attributes                      | 6         |
| <b>C. Climate change</b>                     | <b>6</b>  |
| 9. Climate change                            | 6         |
| <b>Sectors affected</b>                      |           |
| Commercial                                   | 11        |
| Environmental                                | 7         |
| <b>Species or population nuisance traits</b> | <b>24</b> |

|                   |         |      |
|-------------------|---------|------|
| <b>Thresholds</b> |         |      |
|                   | BRA     | -    |
|                   | BRA+CCA | -    |
| <b>Confidence</b> |         |      |
|                   | BRA+CCA | 0.60 |
|                   | BRA     | 0.64 |
|                   | CCA     | 0.25 |

|                      |  |
|----------------------|--|
| <b>Date and Time</b> |  |
| 03/05/2022 18:03:42  |  |

AS-ISK v2

| Taxon and Assessor details         |                                                                                                                                 |
|------------------------------------|---------------------------------------------------------------------------------------------------------------------------------|
| Category                           | Fishes and Lampreys (freshwater)                                                                                                |
| Taxon name                         | <i>Gambusia holbrooki</i>                                                                                                       |
| Common name                        | eastern mosquitofish                                                                                                            |
| Assessor                           | Tatia Kuljanishvili                                                                                                             |
| Risk screening context             |                                                                                                                                 |
| Reason and socio-economic benefits | was introduced into Georgia from Italy in 1925 by Dr. Rukhadze as a biological pest control agent                               |
| Risk assessment area               | South Caucasus                                                                                                                  |
| Taxonomy                           | Actinopteri (ray-finned fishes) > Cyprinodontiformes (Rivulines, killifishes and live bearers) >                                |
| Native range                       | Gambusia holbrooki is native of North America                                                                                   |
| Introduced range                   | Armenia, Azerbaijan, Georgia                                                                                                    |
| URL                                | <a href="https://fishbase.mnhn.fr/summary/Gambusia-holbrooki.html">https://fishbase.mnhn.fr/summary/Gambusia-holbrooki.html</a> |

|                                                |      |                                                                                                                                                                         | Response | Justification (references and/or other information)                                                                                                                                                                                                                                          | Confidence |
|------------------------------------------------|------|-------------------------------------------------------------------------------------------------------------------------------------------------------------------------|----------|----------------------------------------------------------------------------------------------------------------------------------------------------------------------------------------------------------------------------------------------------------------------------------------------|------------|
| A. Biogeography/Historical                     |      |                                                                                                                                                                         |          |                                                                                                                                                                                                                                                                                              |            |
| 1. Domestication/Cultivation                   |      |                                                                                                                                                                         |          |                                                                                                                                                                                                                                                                                              |            |
| 1                                              | 1.01 | Has the taxon been the subject of domestication (or cultivation) for at least 20 generations?                                                                           | No       | This species has no ornamental value, however it is rarely kept indoors by hobbyists                                                                                                                                                                                                         | Medium     |
| 2                                              | 1.02 | Is the taxon harvested in the wild and likely to be sold or used in its live form?                                                                                      | No       | No. this species does not have a comercial value                                                                                                                                                                                                                                             | High       |
| 3                                              | 1.03 | Does the taxon have invasive races, varieties, sub-taxa or congeners?                                                                                                   | Yes      | Gambusia affinis                                                                                                                                                                                                                                                                             | High       |
| 2. Climate, distribution and introduction risk |      |                                                                                                                                                                         |          |                                                                                                                                                                                                                                                                                              |            |
| 4                                              | 2.01 | How similar are the climatic conditions of the Risk Assessment (RA) area and the taxon's native range?                                                                  | High     | It is somehow similar. Especially similar in the Kura river basin                                                                                                                                                                                                                            | Medium     |
| 5                                              | 2.02 | What is the quality of the climate matching data?                                                                                                                       | High     | Good                                                                                                                                                                                                                                                                                         | High       |
| 6                                              | 2.03 | Is the taxon already present outside of captivity in the RA area?                                                                                                       | Yes      | st has been introduced and released in natural water bodies of SC countries since 1920s                                                                                                                                                                                                      | Very high  |
| 7                                              | 2.04 | How many potential vectors could the taxon use to enter in the RA area?                                                                                                 | One      | Biological control                                                                                                                                                                                                                                                                           | Very high  |
| 8                                              | 2.05 | Is the taxon currently found in close proximity to, and likely to enter into, the RA area in the near future (e.g. unintentional and intentional introductions)?        | Yes      | Currently, this species is distributed widely and is considered invasive in the SC (Kuljanishvili et al., 2020)                                                                                                                                                                              | Very high  |
| 3. Invasive elsewhere                          |      |                                                                                                                                                                         |          |                                                                                                                                                                                                                                                                                              |            |
| 9                                              | 3.01 | Has the taxon become naturalised (established viable populations) outside its                                                                                           | Yes      | yes. not only naturalized but also invasive.                                                                                                                                                                                                                                                 | Very high  |
| 10                                             | 3.02 | In the taxon's introduced range, are there known adverse impacts to wild stocks or commercial taxa?                                                                     | Yes      | It was said that this species existance had negative effect on native biodiversity (Kottelat & Freyhof 2007).                                                                                                                                                                                | Very high  |
| 11                                             | 3.03 | In the taxon's introduced range, are there known adverse impacts to aquaculture?                                                                                        | Yes      | Yes, this could be due to competition with the planktonivourous fishes                                                                                                                                                                                                                       | High       |
| 12                                             | 3.04 | In the taxon's introduced range, are there known adverse impacts to ecosystem                                                                                           | Yes      | Can be transmitting diseases, and not used for recreational fisheries                                                                                                                                                                                                                        | Medium     |
| 13                                             | 3.05 | In the taxon's introduced range, are there known adverse socio-economic impacts?                                                                                        | Yes      | This species is difficult to eradicate and it was predicted that it could be the major challange for fisheries an environmental managers<br>( <a href="https://docs.niwa.co.nz/library/public/RoweReviewofimpacts2008">https://docs.niwa.co.nz/library/public/RoweReviewofimpacts2008</a> ). | High       |
| B. Biology/Ecology                             |      |                                                                                                                                                                         |          |                                                                                                                                                                                                                                                                                              |            |
| 4. Undesirable (or persistence) traits         |      |                                                                                                                                                                         |          |                                                                                                                                                                                                                                                                                              |            |
| 14                                             | 4.01 | Is it likely that the taxon will be poisonous or pose other risks to human health?                                                                                      | No       | Not poisonous                                                                                                                                                                                                                                                                                | Very high  |
| 15                                             | 4.02 | Is it likely that the taxon will smother one or more native taxa (that are not threatened or protected)?                                                                | Yes      | It was said that this species existence had negative effect on native biodiversity (Kottelat & Freyhof 2007).                                                                                                                                                                                | Very high  |
| 16                                             | 4.03 | Are there any threatened or protected taxa that the non-native taxon would parasitise in the RA area?                                                                   | No       | Does not parasite                                                                                                                                                                                                                                                                            | Very high  |
| 17                                             | 4.04 | Is the taxon adaptable in terms of climatic and other environmental conditions, thus enhancing its potential persistence if it has invaded or could invade the RA area? | Yes      | it may survive low oxigen environments via taking the oxygen fromm upper levels (kottelat & Freyhof 2007)                                                                                                                                                                                    | High       |
| 18                                             | 4.05 | Is the taxon likely to disrupt food-web structure/function in aquatic ecosystems if it has invaded or is likely to invade the RA                                        | Yes      | It may exploit food resources for native species                                                                                                                                                                                                                                             | Medium     |
| 19                                             | 4.06 | Is the taxon likely to exert adverse impacts on ecosystem services in the RA area?                                                                                      | Yes      | It can transmit parasites and pathogens, is not used for recreational fisheries.                                                                                                                                                                                                             | Medium     |
| 20                                             | 4.07 | Is it likely that the taxon will host, and/or act as a vector for, recognised pests and infectious agents that are endemic in the RA                                    | No       | No information                                                                                                                                                                                                                                                                               | Low        |
| 21                                             | 4.08 | Is it likely that the taxon will host, and/or act as a vector for, recognised pests and infectious agents that are absent from (novel to) the RA area?                  | Yes      | It is possible                                                                                                                                                                                                                                                                               | Medium     |
| 22                                             | 4.09 | Is it likely that the taxon will achieve a body size that will make it more likely to be released from captivity?                                                       | No       | This is small bodied organism                                                                                                                                                                                                                                                                | Very high  |
| 23                                             | 4.10 | Is the taxon capable of sustaining itself in a range of water velocity conditions (e.g. versatile in habitat use)?                                                      | Yes      | It prefers slow-flowing or standing environments                                                                                                                                                                                                                                             | Medium     |



|                                 |      |                                                                                                                                                                              |          |                                                                                                                                                                                                                                                      |           |
|---------------------------------|------|------------------------------------------------------------------------------------------------------------------------------------------------------------------------------|----------|------------------------------------------------------------------------------------------------------------------------------------------------------------------------------------------------------------------------------------------------------|-----------|
| 24                              | 4.11 | Is it likely that the taxon's mode of existence (e.g. excretion of by-products) or behaviours (e.g. feeding) will reduce habitat quality for native taxa?                    | No       | Yes, this could be due to competition with the planktonivorous fishes                                                                                                                                                                                | High      |
| 25                              | 4.12 | Is the taxon likely to maintain a viable population even when present in low densities (or persisting in adverse conditions by way of a dormant form)?                       | Yes      | Reproduces from 3-4 month 3-4 times a year. Within one year 3 generations can be born (Kottelat & Freyhof 2007)                                                                                                                                      | Very high |
| <b>5. Resource exploitation</b> |      |                                                                                                                                                                              |          |                                                                                                                                                                                                                                                      |           |
| 26                              | 5.01 | Is the taxon likely to consume threatened or protected native taxa in the RA area?                                                                                           | Yes      | It is likely to consume the eggs of threatened or protected native taxa                                                                                                                                                                              | High      |
| 27                              | 5.02 | Is the taxon likely to sequester food resources (including nutrients) to the detriment of native taxa in the RA area?                                                        | Yes      | It is possible                                                                                                                                                                                                                                       | Medium    |
| <b>6. Reproduction</b>          |      |                                                                                                                                                                              |          |                                                                                                                                                                                                                                                      |           |
| 28                              | 6.01 | Is the taxon likely to exhibit parental care and/or to reduce age-at-maturity in response to environmental conditions?                                                       | Yes      | These are livebearer species that reproduce from 3-4 month 3-4 times a year. Within one year 3 generations can be born (Kottelat & Freyhof 2007) they can give birth up to 60 fish                                                                   | Very high |
| 29                              | 6.02 | Is the taxon likely to produce viable gametes or propagules (in the RA area)?                                                                                                | Yes      | Yes. It has been considered as established species since 1930ies                                                                                                                                                                                     | Very high |
| 30                              | 6.03 | Is the taxon likely to hybridise naturally with native taxa?                                                                                                                 | No       | No information available                                                                                                                                                                                                                             | Very high |
| 31                              | 6.04 | Is the taxon likely to be hermaphroditic or to display asexual reproduction?                                                                                                 | No       | No. reproduces sexually See: <a href="https://www.fishbase.in/summary/Gambusia-holbrocki.html">https://www.fishbase.in/summary/Gambusia-holbrocki.html</a>                                                                                           | Very high |
| 32                              | 6.05 | Is the taxon dependent on the presence of another taxon (or specific habitat features) to complete its life cycle?                                                           | No       | No. See: <a href="https://www.fishbase.in/summary/Gambusia-holbrocki.html">https://www.fishbase.in/summary/Gambusia-holbrocki.html</a>                                                                                                               | Very high |
| 33                              | 6.06 | Is the taxon known (or likely) to produce a large number of propagules or offspring within a short time span (e.g. < 1 year)?                                                | Yes      | Reproduces from 3-4 month 3-4 times a year. Within one year 3 generations can be born (Kottelat & Freyhof 2007)                                                                                                                                      | Very high |
| 34                              | 6.07 | How many time units (days, months, years) does the taxon require to reach the age-at-first-reproduction?                                                                     | 3        | 3-4 months                                                                                                                                                                                                                                           | Very high |
| <b>7. Dispersal mechanisms</b>  |      |                                                                                                                                                                              |          |                                                                                                                                                                                                                                                      |           |
| 35                              | 7.01 | How many potential internal vectors/pathways could the taxon use to disperse within the RA area (with suitable)                                                              | >1       | Biological control, self-dispersal                                                                                                                                                                                                                   | Very high |
| 36                              | 7.02 | Will any of these vectors/pathways bring the taxon in close proximity to one or more protected areas (e.g. MCZ, MPA, SSSI)?                                                  | Yes      | Yes. This is possible since the accidental or deliberate releases that are common in RA                                                                                                                                                              | Very high |
| 37                              | 7.03 | Does the taxon have a means of actively attaching itself to hard substrata (e.g. ship hulls, pilings, buoys) such that it enhances the likelihood of dispersal?              | No       | Yes. This is possible since the accidental or deliberate releases that are common in RA                                                                                                                                                              | Very high |
| 38                              | 7.04 | Is natural dispersal of the taxon likely to occur as eggs (for animals) or as propagules (for plants: seeds, spores) in the RA area?                                         | No       | this species do not lay eggs                                                                                                                                                                                                                         | Very high |
| 39                              | 7.05 | Is natural dispersal of the taxon likely to occur as larvae/juveniles (for animals) or as fragments/seedlings (for plants) in the RA area?                                   | Yes      | Yes it is possible                                                                                                                                                                                                                                   | Very high |
| 40                              | 7.06 | Are older life stages of the taxon likely to migrate in the RA area for reproduction?                                                                                        | No       | Does not migrate                                                                                                                                                                                                                                     | Very high |
| 41                              | 7.07 | Are propagules or eggs of the taxon likely to be dispersed in the RA area by other animals?                                                                                  | No       | No                                                                                                                                                                                                                                                   | Very high |
| 42                              | 7.08 | Is dispersal of the taxon along any of the vectors/pathways mentioned in the previous seven questions (35-41; i.e. both unintentional or intentional) likely to be           | No       | Introduction for biological control is not happening anymore, however it still spreads itself                                                                                                                                                        | Medium    |
| 43                              | 7.09 | Is dispersal of the taxon density dependent?                                                                                                                                 | Yes      | Yes (Cote et al 2010)                                                                                                                                                                                                                                | High      |
| <b>8. Tolerance attributes</b>  |      |                                                                                                                                                                              |          |                                                                                                                                                                                                                                                      |           |
| 44                              | 8.01 | Is the taxon able to withstand being out of water for extended periods (e.g. minimum of one or more hours) at some stage of its life cycle?                                  | No       | No information                                                                                                                                                                                                                                       | Low       |
| 45                              | 8.02 | Is the taxon tolerant of a wide range of water quality conditions relevant to that taxon? [In the Justification field, indicate the relevant water quality variable(s) being | Yes      | Salinity (Chervinsky 19853), temperature (Uliano et al 2010; Meffe et al 1995), oxygen (Kottelat & Freyhof 2007)                                                                                                                                     | High      |
| 46                              | 8.03 | Can the taxon be controlled or eradicated in the wild with chemical, biological, or other agents/means?                                                                      | Yes      | It can be removed from streams however, it is difficult and costly to remove them from lakes and reservoirs                                                                                                                                          | Low       |
| 47                              | 8.04 | Is the taxon likely to tolerate or benefit from environmental/human disturbance?                                                                                             | Yes      | Can tolerate pollution caused by humans                                                                                                                                                                                                              | Medium    |
| 48                              | 8.05 | Is the taxon able to tolerate salinity levels that are higher or lower than those found in its usual environment?                                                            | Yes      | They can tolerate high salinity levels (Chervinsky 1983)                                                                                                                                                                                             | Very high |
| 49                              | 8.06 | Are there effective natural enemies (predators) of the taxon present in the RA                                                                                               | Yes      | There are fish like Perch, Pike, Catfish.. But There is no information about their effectiveness                                                                                                                                                     | Medium    |
| <b>C. Climate change</b>        |      |                                                                                                                                                                              |          |                                                                                                                                                                                                                                                      |           |
| <b>9. Climate change</b>        |      |                                                                                                                                                                              |          |                                                                                                                                                                                                                                                      |           |
| 50                              | 9.01 | Under the predicted future climatic conditions, are the risks of entry into the RA area posed by the taxon likely to increase, decrease or not change?                       | Increase | It was hypothesized that climate change might alert the mechanisms of transportation and introduction of non-native species. Commercial and recreational activities will increase, that itself increases the propagule pressure levels of non-native | High      |

|    |      |                                                                                                                                                              |           |                                                                                                                                                                                                              |           |
|----|------|--------------------------------------------------------------------------------------------------------------------------------------------------------------|-----------|--------------------------------------------------------------------------------------------------------------------------------------------------------------------------------------------------------------|-----------|
| 51 | 9.02 | Under the predicted future climatic conditions, are the risks of establishment posed by the taxon likely to increase, decrease or not change?                | Increase  | Increased temperatures will cause this species establish in higher altitudes                                                                                                                                 | Very high |
| 52 | 9.03 | Under the predicted future climatic conditions, are the risks of dispersal within the RA area posed by the taxon likely to increase, decrease or not change? | Increase  | It might favour by environmental changes (caused by climate change) that will increase resource availability, resulting their widespread.                                                                    | Very high |
| 53 | 9.04 | Under the predicted future climatic conditions, what is the likely magnitude of future potential impacts on biodiversity and/or ecological integrity/status? | Higher    | Population densities will increase making them on one hand impossible to eradicate and on the other hand, affecting native organisms due to competition, that does not leave much resources for native ones. | High      |
| 54 | 9.05 | Under the predicted future climatic conditions, what is the likely magnitude of future potential impacts on ecosystem structure and/or function?             | Higher    | Future increased temperatures will favour the dispersal and success of this species establishment which itself, affects native species that are of main concern for conservation.                            | Medium    |
| 55 | 9.06 | Under the predicted future climatic conditions, what is the likely magnitude of future potential impacts on ecosystem services/socio-economic factors?       | No change | The magnitude of future potential impact on ecosystem services will not change                                                                                                                               | Medium    |

| Statistics                                     |             |
|------------------------------------------------|-------------|
| Scores                                         |             |
| <b>BRA</b>                                     | <b>38.0</b> |
| <b>BRA Outcome</b>                             | <b>-</b>    |
| <b>BRA+CCA</b>                                 | <b>48.0</b> |
| <b>BRA+CCA Outcome</b>                         | <b>-</b>    |
| Score partition                                |             |
| <b>A. Biogeography/Historical</b>              | <b>19.0</b> |
| 1. Domestication/Cultivation                   | 0.0         |
| 2. Climate, distribution and introduction risk | 1.0         |
| 3. Invasive elsewhere                          | 18.0        |
| <b>B. Biology/Ecology</b>                      | <b>19.0</b> |
| 4. Undesirable (or persistence) traits         | 7.0         |
| 5. Resource exploitation                       | 7.0         |
| 6. Reproduction                                | 2.0         |
| 7. Dispersal mechanisms                        | 0.0         |
| 8. Tolerance attributes                        | 3.0         |
| <b>C. Climate change</b>                       | <b>10.0</b> |
| 9. Climate change                              | 10.0        |
| Answered Questions                             |             |
| <b>Total</b>                                   | <b>55</b>   |
| <b>A. Biogeography/Historical</b>              | <b>13</b>   |
| 1. Domestication/Cultivation                   | 3           |
| 2. Climate, distribution and introduction risk | 5           |
| 3. Invasive elsewhere                          | 5           |
| <b>B. Biology/Ecology</b>                      | <b>36</b>   |
| 4. Undesirable (or persistence) traits         | 12          |
| 5. Resource exploitation                       | 2           |
| 6. Reproduction                                | 7           |
| 7. Dispersal mechanisms                        | 9           |
| 8. Tolerance attributes                        | 6           |
| <b>C. Climate change</b>                       | <b>6</b>    |
| 9. Climate change                              | 6           |
| Sectors affected                               |             |
| <b>Commercial</b>                              | <b>13</b>   |
| <b>Environmental</b>                           | <b>16</b>   |
| <b>Species or population nuisance traits</b>   | <b>22</b>   |

| Thresholds     |             |
|----------------|-------------|
| <b>BRA</b>     | <b>-</b>    |
| <b>BRA+CCA</b> | <b>-</b>    |
| Confidence     |             |
| <b>BRA+CCA</b> | <b>0.79</b> |
| <b>BRA</b>     | <b>0.79</b> |
| <b>CCA</b>     | <b>0.75</b> |

| Date and Time       |  |
|---------------------|--|
| 21/05/2022 14:03:32 |  |

## AS-ISK v2

| Taxon and Assessor details         |                                                                                                                                       |
|------------------------------------|---------------------------------------------------------------------------------------------------------------------------------------|
| Category                           | Fishes and Lampreys (freshwater)                                                                                                      |
| Taxon name                         | <i>Gasterosteus aculeatus</i>                                                                                                         |
| Common name                        | three-spined stickleback                                                                                                              |
| Assessor                           | Bella Japoshvili                                                                                                                      |
| Risk screening context             |                                                                                                                                       |
| Reason and socio-economic benefits | <i>G. aculeatus</i> has invaded Caspian Sea and is widespread already there. It is translocated species                               |
| Risk assessment area               | South Caucasus                                                                                                                        |
| Taxonomy                           | Actinopteri (ray-finned fishes) > Perciformes/Gasterosteidae (Sticklebacks) > Gasterosteidae                                          |
| Native range                       | Curcum arctic temperate regions                                                                                                       |
| Introduced range                   | Caspian Sea                                                                                                                           |
| URL                                | <a href="https://www.fishbase.de/summary/Gasterosteus-aculeatus.html">https://www.fishbase.de/summary/Gasterosteus-aculeatus.html</a> |

|                                                |      | Response                                                                                                                                                                | Justification (references and/or other information) | Confidence                                                                                                                                                                                                                                                                                                                                                                        |           |
|------------------------------------------------|------|-------------------------------------------------------------------------------------------------------------------------------------------------------------------------|-----------------------------------------------------|-----------------------------------------------------------------------------------------------------------------------------------------------------------------------------------------------------------------------------------------------------------------------------------------------------------------------------------------------------------------------------------|-----------|
| A. Biogeography/Historical                     |      |                                                                                                                                                                         |                                                     |                                                                                                                                                                                                                                                                                                                                                                                   |           |
| 1. Domestication/Cultivation                   |      |                                                                                                                                                                         |                                                     |                                                                                                                                                                                                                                                                                                                                                                                   |           |
| 1                                              | 1.01 | Has the taxon been the subject of domestication (or cultivation) for at least 20 generations?                                                                           | No                                                  | Not such fact is known                                                                                                                                                                                                                                                                                                                                                            | High      |
| 2                                              | 1.02 | Is the taxon harvested in the wild and likely to be sold or used in its live form?                                                                                      | Yes                                                 | For the aquarium purpose. Not a documented evidence                                                                                                                                                                                                                                                                                                                               | Low       |
| 3                                              | 1.03 | Does the taxon have invasive races, varieties, sub-taxa or congeners?                                                                                                   | No                                                  | Not other congeneric or invasive races are known                                                                                                                                                                                                                                                                                                                                  | High      |
| 2. Climate, distribution and introduction risk |      |                                                                                                                                                                         |                                                     |                                                                                                                                                                                                                                                                                                                                                                                   |           |
| 4                                              | 2.01 | How similar are the climatic conditions of the Risk Assessment (RA) area and the taxon's native range?                                                                  | High                                                | based on Climatch results                                                                                                                                                                                                                                                                                                                                                         | Medium    |
| 5                                              | 2.02 | What is the quality of the climate matching data?                                                                                                                       | Low                                                 | Due to low resolution of local climate data                                                                                                                                                                                                                                                                                                                                       | High      |
| 6                                              | 2.03 | Is the taxon already present outside of captivity in the RA area?                                                                                                       | Yes                                                 | Kuljanishvili, T., Mumladze, L., Japoshvili, B., Mustafayev, N., Ibrahimov, S., Patoka, J., ... & Kalous, L. (2021). The first unified inventory of non-native fishes of the South Caucasian countries, Armenia, Azerbaijan, and Georgia. Knowledge & Management of Aquatic Ecosystems, (422), 32.                                                                                | Very high |
| 7                                              | 2.04 | How many potential vectors could the taxon use to enter in the RA area?                                                                                                 | >1                                                  | It spreads with help of human (direct translocation) and alos via the chennel system                                                                                                                                                                                                                                                                                              | Medium    |
| 8                                              | 2.05 | Is the taxon currently found in close proximity to, and likely to enter into, the RA area in the near future (e.g. unintentional and intentional introductions)?        | Yes                                                 | Already in the RA area Kuljanishvili, T., Mumladze, L., Japoshvili, B., Mustafayev, N., Ibrahimov, S., Patoka, J., ... & Kalous, L. (2021). The first unified inventory of non-native fishes of the South Caucasian countries, Armenia, Azerbaijan, and Georgia. Knowledge & Management of Aquatic Ecosystems, (422), 32.                                                         | High      |
| 3. Invasive elsewhere                          |      |                                                                                                                                                                         |                                                     |                                                                                                                                                                                                                                                                                                                                                                                   |           |
| 9                                              | 3.01 | Has the taxon become naturalised (established viable populations) outside its native range?                                                                             | Yes                                                 | Kuljanishvili, T., Mumladze, L., Japoshvili, B., Mustafayev, N., Ibrahimov, S., Patoka, J., ... & Kalous, L. (2021). The first unified inventory of non-native fishes of the South Caucasian countries, Armenia, Azerbaijan, and Georgia. Knowledge & Management of Aquatic Ecosystems, (422), 32.                                                                                | High      |
| 10                                             | 3.02 | In the taxon's introduced range, are there known adverse impacts to wild stocks or commercial taxa?                                                                     | Yes                                                 | Roch, S., von Ammon, L., Geist, J., & Brinker, A. (2018). Foraging habits of invasive three-spined sticklebacks (Gasterosteus aculeatus)–impacts on fisheries yield in Upper Lake Constance. Fisheries Research, 204, 172-180.                                                                                                                                                    | Medium    |
| 11                                             | 3.03 | In the taxon's introduced range, are there known adverse impacts to aquaculture?                                                                                        | Yes                                                 | Roch, S., von Ammon, L., Geist, J., & Brinker, A. (2018). Foraging habits of invasive three-spined sticklebacks (Gasterosteus aculeatus)–impacts on fisheries yield in Upper Lake Constance. Fisheries Research, 204, 172-180.                                                                                                                                                    | High      |
| 12                                             | 3.04 | In the taxon's introduced range, are there known adverse impacts to ecosystem services?                                                                                 | Yes                                                 | Candolin, U. (2019). The threespine stickleback (Gasterosteus aculeatus) as a modifier of ecological disturbances. Evolutionary Ecology Research.                                                                                                                                                                                                                                 | Low       |
| 13                                             | 3.05 | In the taxon's introduced range, are there known adverse socio-economic impacts?                                                                                        | Yes                                                 | Roch, S., von Ammon, L., Geist, J., & Brinker, A. (2018). Foraging habits of invasive three-spined sticklebacks (Gasterosteus aculeatus)–impacts on fisheries yield in Upper Lake Constance. Fisheries Research, 204, 172-180.                                                                                                                                                    | High      |
| B. Biology/Ecology                             |      |                                                                                                                                                                         |                                                     |                                                                                                                                                                                                                                                                                                                                                                                   |           |
| 4. Undesirable (or persistence) traits         |      |                                                                                                                                                                         |                                                     |                                                                                                                                                                                                                                                                                                                                                                                   |           |
| 14                                             | 4.01 | Is it likely that the taxon will be poisonous or pose other risks to human health?                                                                                      | No                                                  | Not a poisonous or risky species for human health                                                                                                                                                                                                                                                                                                                                 | High      |
| 15                                             | 4.02 | Is it likely that the taxon will smother one or more native taxa (that are not threatened or protected)?                                                                | Yes                                                 | Roch, S., von Ammon, L., Geist, J., & Brinker, A. (2018). Foraging habits of invasive three-spined sticklebacks (Gasterosteus aculeatus)–impacts on fisheries yield in Upper Lake Constance. Fisheries Research, 204, 172-180.                                                                                                                                                    | High      |
| 16                                             | 4.03 | Are there any threatened or protected taxa that the non-native taxon would parasitise in the RA area?                                                                   | No                                                  | Species is not parasite                                                                                                                                                                                                                                                                                                                                                           | High      |
| 17                                             | 4.04 | Is the taxon adaptable in terms of climatic and other environmental conditions, thus enhancing its potential persistence if it has invaded or could invade the RA area? | Yes                                                 | It is capable to survive in fresh, brackish and marine waters                                                                                                                                                                                                                                                                                                                     | High      |
| 18                                             | 4.05 | Is the taxon likely to disrupt food-web structure/function in aquatic ecosystems if it has invaded or is likely to invade the RA area?                                  | Yes                                                 | Candolin, U. (2019). The threespine stickleback (Gasterosteus aculeatus) as a modifier of ecological disturbances. Evolutionary Ecology Research.; Roch, S., von Ammon, L., Geist, J., & Brinker, A. (2018). Foraging habits of invasive three-spined sticklebacks (Gasterosteus aculeatus)–impacts on fisheries yield in Upper Lake Constance. Fisheries Research. 204. 172-180. | Medium    |

|                                 |      |                                                                                                                                                                    |     |                                                                                                                                                                                                                                                                                                                                                                                                                                                                                                                                                                                                                                             |           |
|---------------------------------|------|--------------------------------------------------------------------------------------------------------------------------------------------------------------------|-----|---------------------------------------------------------------------------------------------------------------------------------------------------------------------------------------------------------------------------------------------------------------------------------------------------------------------------------------------------------------------------------------------------------------------------------------------------------------------------------------------------------------------------------------------------------------------------------------------------------------------------------------------|-----------|
| 19                              | 4.06 | Is the taxon likely to exert adverse impacts on ecosystem services in the RA area?                                                                                 | Yes | Candolin, U. (2019). The threespine stickleback ( <i>Gasterosteus aculeatus</i> ) as a modifier of ecological disturbances. <i>Evolutionary Ecology Research</i> .; Roch, S., von Ammon, L., Geist, J., & Brinker, A. (2018). Foraging habits of invasive three-spined sticklebacks ( <i>Gasterosteus aculeatus</i> )—impacts on fisheries yield in Upper Lake Constance. <i>Fisheries Research</i> , 204, 172-180.                                                                                                                                                                                                                         | Medium    |
| 20                              | 4.07 | Is it likely that the taxon will host, and/or act as a vector for, recognised pests and infectious agents that are endemic in the RA                               | No  | No documented evidence exists                                                                                                                                                                                                                                                                                                                                                                                                                                                                                                                                                                                                               | Low       |
| 21                              | 4.08 | Is it likely that the taxon will host, and/or act as a vector for, recognised pests and infectious agents that are absent from (novel to) the RA area?             | Yes | The species can be host of many parasites and infectious agents absent from the RA area in the past. e.g. hrefall, W. (1968). A mass die-off of three-spined sticklebacks ( <i>Gasterosteus aculeatus</i> L.) caused by parasites. <i>Canadian Journal of Zoology</i> , 46(1), 105-106. Chappell, L. H. (1969). The parasites of the three-spined stickleback <i>Gasterosteus aculeatus</i> L. from a Yorkshire pond. I. <i>Seasonal variation of parasite fauna. Journal of Fish Biology</i> , 1(2), <a href="https://www.fishbase.de/summary/Gasterosteus-aculeatus.html">https://www.fishbase.de/summary/Gasterosteus-aculeatus.html</a> | High      |
| 22                              | 4.09 | Is it likely that the taxon will achieve a body size that will make it more likely to be released from captivity?                                                  | No  |                                                                                                                                                                                                                                                                                                                                                                                                                                                                                                                                                                                                                                             | High      |
| 23                              | 4.10 | Is the taxon capable of sustaining itself in a range of water velocity conditions (e.g. versatile in habitat use)?                                                 | Yes | The species is known from many different water bodies including lotinc and lentic systems                                                                                                                                                                                                                                                                                                                                                                                                                                                                                                                                                   | High      |
| 24                              | 4.11 | Is it likely that the taxon's mode of existence (e.g. excretion of by-products) or behaviours (e.g. feeding) will reduce habitat quality for native taxa?          | No  | No documented evidence exists                                                                                                                                                                                                                                                                                                                                                                                                                                                                                                                                                                                                               | Low       |
| 25                              | 4.12 | Is the taxon likely to maintain a viable population even when present in low densities (or persisting in adverse conditions by way of a dormant form)?             | Yes | No documented evidence. Based on professional judgement                                                                                                                                                                                                                                                                                                                                                                                                                                                                                                                                                                                     | Low       |
| <b>5. Resource exploitation</b> |      |                                                                                                                                                                    |     |                                                                                                                                                                                                                                                                                                                                                                                                                                                                                                                                                                                                                                             |           |
| 26                              | 5.01 | Is the taxon likely to consume threatened or protected native taxa in the RA area?                                                                                 | Yes | Species is predatory and thus can consume anything in freshwater while at juvenile stage                                                                                                                                                                                                                                                                                                                                                                                                                                                                                                                                                    | High      |
| 27                              | 5.02 | Is the taxon likely to sequester food resources (including nutrients) to the detriment of native taxa in the RA area?                                              | Yes | Thogh no documented evidence exists.                                                                                                                                                                                                                                                                                                                                                                                                                                                                                                                                                                                                        | Low       |
| <b>6. Reproduction</b>          |      |                                                                                                                                                                    |     |                                                                                                                                                                                                                                                                                                                                                                                                                                                                                                                                                                                                                                             |           |
| 28                              | 6.01 | Is the taxon likely to exhibit parental care and/or to reduce age-at-maturity in response to environmental conditions?                                             | Yes | Pinder, A.C., 2001. Keys to larval and juvenile stages of coarse fishes from fresh waters in the British Isles. <i>Freshwater Biological Association. The Ferry House, Far Sawrey, Ambleside, Cumbria, UK. Scientific Publication No. 60. 136 p.</i>                                                                                                                                                                                                                                                                                                                                                                                        | Very high |
| 29                              | 6.02 | Is the taxon likely to produce viable gametes or propagules (in the RA area)?                                                                                      | Yes | It is already reproducing in RA area for decades                                                                                                                                                                                                                                                                                                                                                                                                                                                                                                                                                                                            | Very high |
| 30                              | 6.03 | Is the taxon likely to hybridise naturally with native taxa?                                                                                                       | No  | No documented evidence exists                                                                                                                                                                                                                                                                                                                                                                                                                                                                                                                                                                                                               | Very high |
| 31                              | 6.04 | Is the taxon likely to be hermaphroditic or to display asexual reproduction?                                                                                       | No  | The species is reproducing sexually                                                                                                                                                                                                                                                                                                                                                                                                                                                                                                                                                                                                         | Very high |
| 32                              | 6.05 | Is the taxon dependent on the presence of another taxon (or specific habitat features) to complete its life cycle?                                                 | No  | No documented evidence exists                                                                                                                                                                                                                                                                                                                                                                                                                                                                                                                                                                                                               | High      |
| 33                              | 6.06 | Is the taxon known (or likely) to produce a large number of propagules or offspring within a short time span (e.g. < 1 year)?                                      | No  | Usually up to 400 eggs annually                                                                                                                                                                                                                                                                                                                                                                                                                                                                                                                                                                                                             | High      |
| 34                              | 6.07 | How many time units (days, months, years) does the taxon require to reach the age-at-first-reproduction?                                                           | 1   | Years                                                                                                                                                                                                                                                                                                                                                                                                                                                                                                                                                                                                                                       | Very high |
| <b>7. Dispersal mechanisms</b>  |      |                                                                                                                                                                    |     |                                                                                                                                                                                                                                                                                                                                                                                                                                                                                                                                                                                                                                             |           |
| 35                              | 7.01 | How many potential internal vectors/pathways could the taxon use to disperse within the RA area (with suitable habitats nearby)?                                   | >1  | Human mediated translocation and direct migration through chanal system. Kuljanishvili, T., Mumladze, L., Japoshvili, B., Mustafayev, N., Ibrahimov, S., Patoka, J., ... & Kalous, L. (2021). The first unified inventory of non-native fishes of the South Caucasian countries, Armenia, Azerbaijan, and Georgia. <i>Knowledge &amp; Management of Aquatic Ecosystems</i> , (422), 32.                                                                                                                                                                                                                                                     | Very high |
| 36                              | 7.02 | Will any of these vectors/pathways bring the taxon in close proximity to one or more protected areas (e.g. MCZ, MPA, SSSI)?                                        | Yes | The species is already known from the Kolkheti national park along the Black Sea                                                                                                                                                                                                                                                                                                                                                                                                                                                                                                                                                            | High      |
| 37                              | 7.03 | Does the taxon have a means of actively attaching itself to hard substrata (e.g. ship hulls, pilings, buoys) such that it enhances the likelihood of dispersal?    | No  | No such fact is known                                                                                                                                                                                                                                                                                                                                                                                                                                                                                                                                                                                                                       | Very high |
| 38                              | 7.04 | Is natural dispersal of the taxon likely to occur as eggs (for animals) or as propagules (for plants: seeds, spores) in the RA area?                               | No  | No documented evidence exists                                                                                                                                                                                                                                                                                                                                                                                                                                                                                                                                                                                                               | High      |
| 39                              | 7.05 | Is natural dispersal of the taxon likely to occur as larvae/juveniles (for animals) or as fragments/seedlings (for plants) in the RA area?                         | Yes | Highly expected but not documented evidence                                                                                                                                                                                                                                                                                                                                                                                                                                                                                                                                                                                                 | Medium    |
| 40                              | 7.06 | Are older life stages of the taxon likely to migrate in the RA area for reproduction?                                                                              | No  | No documented evidence exists                                                                                                                                                                                                                                                                                                                                                                                                                                                                                                                                                                                                               | Low       |
| 41                              | 7.07 | Are propagules or eggs of the taxon likely to be dispersed in the RA area by other animals?                                                                        | No  | No documented evidence exists                                                                                                                                                                                                                                                                                                                                                                                                                                                                                                                                                                                                               | High      |
| 42                              | 7.08 | Is dispersal of the taxon along any of the vectors/pathways mentioned in the previous seven questions (35–41; i.e. both unintentional or intentional) likely to be | Yes | The species can reach alrge number of freshwater bodies thorough water currents in RA Area                                                                                                                                                                                                                                                                                                                                                                                                                                                                                                                                                  | Low       |

|                                |      |                                                                                                                                                                              |           |                                                                                                                                                                    |        |
|--------------------------------|------|------------------------------------------------------------------------------------------------------------------------------------------------------------------------------|-----------|--------------------------------------------------------------------------------------------------------------------------------------------------------------------|--------|
| 43                             | 7.09 | Is dispersal of the taxon density dependent?                                                                                                                                 | No        | No documented evidence exists                                                                                                                                      | Low    |
| <b>8. Tolerance attributes</b> |      |                                                                                                                                                                              |           |                                                                                                                                                                    |        |
| 44                             | 8.01 | Is the taxon able to withstand being out of water for extended periods (e.g. minimum of one or more hours) at some stage of its life cycle?                                  | No        | No documented evidence exists                                                                                                                                      | Medium |
| 45                             | 8.02 | Is the taxon tolerant of a wide range of water quality conditions relevant to that taxon? [In the Justification field, indicate the relevant water quality variable(s) being | No        | No documented evidence exists                                                                                                                                      | Low    |
| 46                             | 8.03 | Can the taxon be controlled or eradicated in the wild with chemical, biological, or other agents/means?                                                                      | No        | No such practice exists                                                                                                                                            | Medium |
| 47                             | 8.04 | Is the taxon likely to tolerate or benefit from environmental/human disturbance?                                                                                             | Yes       | Candolin, U. (2019). The threespine stickleback ( <i>Gasterosteus aculeatus</i> ) as a modifier of ecological disturbances. <i>Evolutionary Ecology Research</i> . | Medium |
| 48                             | 8.05 | Is the taxon able to tolerate salinity levels that are higher or lower than those found in its usual environment?                                                            | No        | No documented evidence exists                                                                                                                                      | Low    |
| 49                             | 8.06 | Are there effective natural enemies (predators) of the taxon present in the RA                                                                                               | No        | No documented evidence exists                                                                                                                                      | Low    |
| <b>C. Climate change</b>       |      |                                                                                                                                                                              |           |                                                                                                                                                                    |        |
| <b>9. Climate change</b>       |      |                                                                                                                                                                              |           |                                                                                                                                                                    |        |
| 50                             | 9.01 | Under the predicted future climatic conditions, are the risks of entry into the RA area posed by the taxon likely to increase, decrease or not change?                       | No change | Professional judgement - not expected                                                                                                                              | Medium |
| 51                             | 9.02 | Under the predicted future climatic conditions, are the risks of establishment posed by the taxon likely to increase, decrease or not change?                                | No change | Professional judgement - not expected                                                                                                                              | Medium |
| 52                             | 9.03 | Under the predicted future climatic conditions, are the risks of dispersal within the RA area posed by the taxon likely to increase, decrease or not change?                 | No change | Professional judgement - not expected                                                                                                                              | Medium |
| 53                             | 9.04 | Under the predicted future climatic conditions, what is the likely magnitude of future potential impacts on biodiversity and/or ecological integrity/status?                 | No change | Professional judgement - not expected                                                                                                                              | Medium |
| 54                             | 9.05 | Under the predicted future climatic conditions, what is the likely magnitude of future potential impacts on ecosystem structure and/or function?                             | Lower     | Professional judgement - not expected                                                                                                                              | Low    |
| 55                             | 9.06 | Under the predicted future climatic conditions, what is the likely magnitude of future potential impacts on ecosystem services/socio-economic factors?                       | Higher    | Professional judgement - not expected                                                                                                                              | Low    |

| Statistics                                     |             |
|------------------------------------------------|-------------|
| Scores                                         |             |
| <b>BRA</b>                                     | <b>38.0</b> |
| <b>BRA Outcome</b>                             | -           |
| <b>BRA+CCA</b>                                 | <b>38.0</b> |
| <b>BRA+CCA Outcome</b>                         | -           |
| Score partition                                |             |
| <b>A. Biogeography/Historical</b>              | <b>20.0</b> |
| 1. Domestication/Cultivation                   | 0.0         |
| 2. Climate, distribution and introduction risk | 2.0         |
| 3. Invasive elsewhere                          | 18.0        |
| <b>B. Biology/Ecology</b>                      | <b>18.0</b> |
| 4. Undesirable (or persistence) traits         | 7.0         |
| 5. Resource exploitation                       | 7.0         |
| 6. Reproduction                                | 2.0         |
| 7. Dispersal mechanisms                        | 0.0         |
| 8. Tolerance attributes                        | 2.0         |
| <b>C. Climate change</b>                       | <b>0.0</b>  |
| 9. Climate change                              | 0.0         |
| Answered Questions                             |             |
| <b>Total</b>                                   | <b>55</b>   |
| <b>A. Biogeography/Historical</b>              | <b>13</b>   |
| 1. Domestication/Cultivation                   | 3           |
| 2. Climate, distribution and introduction risk | 5           |
| 3. Invasive elsewhere                          | 5           |
| <b>B. Biology/Ecology</b>                      | <b>36</b>   |
| 4. Undesirable (or persistence) traits         | 12          |
| 5. Resource exploitation                       | 2           |
| 6. Reproduction                                | 7           |
| 7. Dispersal mechanisms                        | 9           |
| 8. Tolerance attributes                        | 6           |
| <b>C. Climate change</b>                       | <b>6</b>    |
| 9. Climate change                              | 6           |
| Sectors affected                               |             |
| <b>Commercial</b>                              | <b>19</b>   |
| <b>Environmental</b>                           | <b>10</b>   |
| <b>Species or population nuisance traits</b>   | <b>14</b>   |

| Thresholds |         |      |
|------------|---------|------|
|            | BRA     | -    |
|            | BRA+CCA | -    |
| Confidence |         |      |
|            | BRA+CCA | 0.60 |
|            | BRA     | 0.62 |
|            | CCA     | 0.42 |

| Date and Time       |  |
|---------------------|--|
| 16/05/2022 12:05:04 |  |

## AS-ISK v2

| Taxon and Assessor details         |                                                                                                                                       |
|------------------------------------|---------------------------------------------------------------------------------------------------------------------------------------|
| Category                           | Fishes and Lampreys (freshwater)                                                                                                      |
| Taxon name                         | <i>Gasterosteus aculeatus</i>                                                                                                         |
| Common name                        | three-spined stickleback                                                                                                              |
| Assessor                           | Giorgi Epitashvili                                                                                                                    |
| Risk screening context             |                                                                                                                                       |
| Reason and socio-economic benefits | Gasterosteus aculeatus is a fish native to most inland and coastal waters north of 30°N. It has long                                  |
| Risk assessment area               | South Caucasus                                                                                                                        |
| Taxonomy                           | Gasterosteus aculeatus Linnaeus 1758                                                                                                  |
| Native range                       | Circumarctic and temperate regions: Extending south to the Black Sea, southern Italy, Iberian                                         |
| Introduced range                   | According to Miller and Hubbs (1969), the threespine stickleback was introduced into the Mohave                                       |
| URL                                | <a href="https://www.fishbase.de/summary/Gasterosteus-aculeatus.html">https://www.fishbase.de/summary/Gasterosteus-aculeatus.html</a> |

|                                                |      | Response                                                                                                                                                                | Justification (references and/or other information) | Confidence                                                                                                                                                                                                                                                                                                                                 |           |
|------------------------------------------------|------|-------------------------------------------------------------------------------------------------------------------------------------------------------------------------|-----------------------------------------------------|--------------------------------------------------------------------------------------------------------------------------------------------------------------------------------------------------------------------------------------------------------------------------------------------------------------------------------------------|-----------|
| A. Biogeography/Historical                     |      |                                                                                                                                                                         |                                                     |                                                                                                                                                                                                                                                                                                                                            |           |
| 1. Domestication/Cultivation                   |      |                                                                                                                                                                         |                                                     |                                                                                                                                                                                                                                                                                                                                            |           |
| 1                                              | 1.01 | Has the taxon been the subject of domestication (or cultivation) for at least 20 generations?                                                                           | Yes                                                 | Three-spined stickleback is easy to find in nature and easy to keep in aquaria.                                                                                                                                                                                                                                                            | High      |
| 2                                              | 1.02 | Is the taxon harvested in the wild and likely to be sold or used in its live form?                                                                                      | No                                                  | This fish is small sized (8-9 cm) and dos not have a trade importance.                                                                                                                                                                                                                                                                     | Very high |
| 3                                              | 1.03 | Does the taxon have invasive races, varieties, sub-taxa or congeners?                                                                                                   | Yes                                                 | A massive increase in the pelagic population of non-endemic three-spined sticklebacks, <i>Gasterosteus aculeatus</i> L. in Lake Constance has coincided with drastic declines in fishery yields. This study assesses the possible direct and indirect impact of the mass occurrence on native fish species in the lake (Roch et al. 2018). | Very high |
| 2. Climate, distribution and introduction risk |      |                                                                                                                                                                         |                                                     |                                                                                                                                                                                                                                                                                                                                            |           |
| 4                                              | 2.01 | How similar are the climatic conditions of the Risk Assessment (RA) area and the taxon's native range?                                                                  | High                                                | <i>G. aculeatus</i> is naturally distributed in the Caucasus region                                                                                                                                                                                                                                                                        | Very high |
| 5                                              | 2.02 | What is the quality of the climate matching data?                                                                                                                       | High                                                | <i>G. aculeatus</i> is naturally distributed in the Caucasus region                                                                                                                                                                                                                                                                        | Very high |
| 6                                              | 2.03 | Is the taxon already present outside of captivity in the RA area?                                                                                                       | Yes                                                 | <i>G. aculeatus</i> is naturally distributed in the Caucasus region                                                                                                                                                                                                                                                                        | Very high |
| 7                                              | 2.04 | How many potential vectors could the taxon use to enter in the RA area?                                                                                                 | One                                                 | <i>G. aculeatus</i> is naturally spreads within the Caucasus region                                                                                                                                                                                                                                                                        | High      |
| 8                                              | 2.05 | Is the taxon currently found in close proximity to, and likely to enter into, the RA area in the near future (e.g. unintentional and intentional introductions)?        | Yes                                                 | There are two sticklebacks ( <i>Gasterosteus aculeatus</i> , an exotic, and <i>Pungitius platygaster</i> , a native) and one native pipefish ( <i>Syngnathus caspius</i> ), the natives found in the Caspian Sea basin and the exotic in that basin and adjacent basins (Coad 2015).                                                       | Very high |
| 3. Invasive elsewhere                          |      |                                                                                                                                                                         |                                                     |                                                                                                                                                                                                                                                                                                                                            |           |
| 9                                              | 3.01 | Has the taxon become naturalised (established viable populations) outside its                                                                                           | Yes                                                 | <i>Gasterosteus aculeatus</i> , an exotic species found in the Caspian Sea basin, Iran (Coad 2015).                                                                                                                                                                                                                                        | High      |
| 10                                             | 3.02 | In the taxon's introduced range, are there known adverse impacts to wild stocks or commercial taxa?                                                                     | Yes                                                 | A massive increase in the pelagic population of non-endemic three-spined sticklebacks, <i>Gasterosteus aculeatus</i> L. in Lake Constance has coincided with drastic declines in fishery yields. This study assesses the possible direct and indirect impact of the mass occurrence on native fish species in the lake (Roch et al. 2018). | Very high |
| 11                                             | 3.03 | In the taxon's introduced range, are there known adverse impacts to aquaculture?                                                                                        | Yes                                                 | A massive increase in the pelagic population of non-endemic three-spined sticklebacks, <i>Gasterosteus aculeatus</i> L. in Lake Constance has coincided with drastic declines in fishery yields (Roch et al.                                                                                                                               | Medium    |
| 12                                             | 3.04 | In the taxon's introduced range, are there known adverse impacts to ecosystem                                                                                           | No                                                  | Data deficient                                                                                                                                                                                                                                                                                                                             | Medium    |
| 13                                             | 3.05 | In the taxon's introduced range, are there known adverse socio-economic impacts?                                                                                        | No                                                  | Data deficient                                                                                                                                                                                                                                                                                                                             | Medium    |
| B. Biology/Ecology                             |      |                                                                                                                                                                         |                                                     |                                                                                                                                                                                                                                                                                                                                            |           |
| 4. Undesirable (or persistence) traits         |      |                                                                                                                                                                         |                                                     |                                                                                                                                                                                                                                                                                                                                            |           |
| 14                                             | 4.01 | Is it likely that the taxon will be poisonous or pose other risks to human health?                                                                                      | No                                                  | This species does not pose a threat to humans.                                                                                                                                                                                                                                                                                             | High      |
| 15                                             | 4.02 | Is it likely that the taxon will smother one or more native taxa (that are not threatened or protected)?                                                                | Yes                                                 | In absence of larval prey, sticklebacks were shown to feed predominantly on <i>Daphnia</i> in the field, indicating a strong interspecific food competition with whitefish (Roch et al. 2018)                                                                                                                                              | Very high |
| 16                                             | 4.03 | Are there any threatened or protected taxa that the non-native taxon would parasitise in the RA area?                                                                   | Yes                                                 | <i>G. aculeatus</i> can eat Sturgeon ( <i>Acipenser</i> spp) and other threathened/protected species eggs.                                                                                                                                                                                                                                 | Medium    |
| 17                                             | 4.04 | Is the taxon adaptable in terms of climatic and other environmental conditions, thus enhancing its potential persistence if it has invaded or could invade the RA area? | Yes                                                 | This species is naturally occurring in the SC region (Kuljanishvili et al. 2020)                                                                                                                                                                                                                                                           | Very high |
| 18                                             | 4.05 | Is the taxon likely to disrupt food-web structure/function in aquatic ecosystems if it has invaded or is likely to invade the RA                                        | No                                                  | This species is naturally occurring in the SC region (Kuljanishvili et al. 2020) and therefore a similar fact is not to be expected.                                                                                                                                                                                                       | High      |
| 19                                             | 4.06 | Is the taxon likely to exert adverse impacts on ecosystem services in the RA area?                                                                                      | No                                                  | This species is naturally occuring in the SC region (Kuljanishvili et al. 2020) and no such fact has been observed at this stage.                                                                                                                                                                                                          | High      |
| 20                                             | 4.07 | Is it likely that the taxon will host, and/or act as a vector for, recognised pests and infectious agents that are endemic in the RA                                    | Not applicable                                      | Data deficient                                                                                                                                                                                                                                                                                                                             | Low       |
| 21                                             | 4.08 | Is it likely that the taxon will host, and/or act as a vector for, recognised pests and infectious agents that are absent from (novel to) the RA area?                  | Not applicable                                      | Data deficient                                                                                                                                                                                                                                                                                                                             | Low       |

|                                 |      |                                                                                                                                                                    |                |                                                                                                                                                                                                                                                                                                                                                                                                                                                                                                                                                                                        |           |
|---------------------------------|------|--------------------------------------------------------------------------------------------------------------------------------------------------------------------|----------------|----------------------------------------------------------------------------------------------------------------------------------------------------------------------------------------------------------------------------------------------------------------------------------------------------------------------------------------------------------------------------------------------------------------------------------------------------------------------------------------------------------------------------------------------------------------------------------------|-----------|
| 22                              | 4.09 | Is it likely that the taxon will achieve a body size that will make it more likely to be released from captivity?                                                  | No             | This species is small sized and does not has a trade importance (Ninua et al. 2013).                                                                                                                                                                                                                                                                                                                                                                                                                                                                                                   | Very high |
| 23                              | 4.10 | Is the taxon capable of sustaining itself in a range of water velocity conditions (e.g. versatile in habitat use)?                                                 | Yes            | In freshwater, adults prefer to live in small stream but may occur in a variety of habitats including lakes and large rivers.                                                                                                                                                                                                                                                                                                                                                                                                                                                          | High      |
| 24                              | 4.11 | Is it likely that the taxon's mode of existence (e.g. excretion of by-products) or behaviours (e.g. feeding) will reduce habitat quality for native taxa?          | Yes            | In 2015, nearly 180 million artificially hatched whitefish derived from wild offspring were released into Lake Constance (IBKF, 2016), resulting in an estimated biomass input of over a ton within a short time period. This easy, nutrient and energy rich food source in the oligotrophic water might facilitate the stickleback development, which permits the species to fully exploit the pelagic habitat and simultaneously reduce recruitment                                                                                                                                  | Low       |
| 25                              | 4.12 | Is the taxon likely to maintain a viable population even when present in low densities (or persisting in adverse conditions by way of a dormant form)?             | Yes            | Own judgement                                                                                                                                                                                                                                                                                                                                                                                                                                                                                                                                                                          | Low       |
| <b>5. Resource exploitation</b> |      |                                                                                                                                                                    |                |                                                                                                                                                                                                                                                                                                                                                                                                                                                                                                                                                                                        |           |
| 26                              | 5.01 | Is the taxon likely to consume threatened or protected native taxa in the RA area?                                                                                 | Yes            | The probability of this is high, because the <i>G. aculeatus</i> is a predator fish and can eat threatened or protected species larvae/eggs (e.g. Sturgeons, Colchic barb - <i>Capoeta sieboldii</i> ,                                                                                                                                                                                                                                                                                                                                                                                 | Medium    |
| 27                              | 5.02 | Is the taxon likely to sequester food resources (including nutrients) to the detriment of native taxa in the RA area?                                              | Yes            | In case of lake Constanca study shows that in absence of larval prey, sticklebacks were shown to feed predominantly on <i>Daphnia</i> in the field, indicating a strong interspecific food competition with whitefish - <i>Coregonus lavaretus</i> (Roch et al. 2018).                                                                                                                                                                                                                                                                                                                 | High      |
| <b>6. Reproduction</b>          |      |                                                                                                                                                                    |                |                                                                                                                                                                                                                                                                                                                                                                                                                                                                                                                                                                                        |           |
| 28                              | 6.01 | Is the taxon likely to exhibit parental care and/or to reduce age-at-maturity in response to environmental conditions?                                             | Yes            | This species displays elaborate breeding behavior (defending a territory, building a nest, taking care of the eggs and fry)                                                                                                                                                                                                                                                                                                                                                                                                                                                            | Medium    |
| 29                              | 6.02 | Is the taxon likely to produce viable gametes or propagules (in the RA area)?                                                                                      | Yes            | This species is naturally reproduces in the region (Ninua et al. 2013; Kuljanishvili et al. 2020).                                                                                                                                                                                                                                                                                                                                                                                                                                                                                     | Very high |
| 30                              | 6.03 | Is the taxon likely to hybridise naturally with native taxa?                                                                                                       | Not applicable | Data deficient                                                                                                                                                                                                                                                                                                                                                                                                                                                                                                                                                                         | Low       |
| 31                              | 6.04 | Is the taxon likely to be hermaphroditic or to display asexual reproduction?                                                                                       | Yes            | Sticklebacks were raised from syngamy through sexual maturity in untreated water and in three target concentrations of sodium perchlorate-treated water. Perchlorate was found to interfere with the expression of nuptial coloration, courtship behavior, and normal sexual development. Genetic testing revealed that some females were masculinized to the extent that they produced both sperm and eggs, and histological analysis showed that these individuals had intersexual gonads (ovotestes) containing both oocytes and cells undergoing spermatogenesis (Bernhardt et al. | Very high |
| 32                              | 6.05 | Is the taxon dependent on the presence of another taxon (or specific habitat features) to complete its life cycle?                                                 | No             | Data deficient                                                                                                                                                                                                                                                                                                                                                                                                                                                                                                                                                                         | Medium    |
| 33                              | 6.06 | Is the taxon known (or likely) to produce a large number of propagules or offspring within a short time span (e.g. < 1 year)?                                      | No             | Fecundity of <i>G. aculeatus</i> is 60-400 eggs (Ninua et al. 2013).                                                                                                                                                                                                                                                                                                                                                                                                                                                                                                                   | High      |
| 34                              | 6.07 | How many time units (days, months, years) does the taxon require to reach the age-at-first-reproduction?                                                           | 1              | The fish becomes sexually mature at the age of 14-18 months (Ninua et al. 2013).                                                                                                                                                                                                                                                                                                                                                                                                                                                                                                       | High      |
| <b>7. Dispersal mechanisms</b>  |      |                                                                                                                                                                    |                |                                                                                                                                                                                                                                                                                                                                                                                                                                                                                                                                                                                        |           |
| 35                              | 7.01 | How many potential internal vectors/pathways could the taxon use to disperse within the RA area (with suitable                                                     | One            | This species may be spread unintentionally by humans                                                                                                                                                                                                                                                                                                                                                                                                                                                                                                                                   | Medium    |
| 36                              | 7.02 | Will any of these vectors/pathways bring the taxon in close proximity to one or more protected areas (e.g. MCZ, MPA, SSSI)?                                        | Yes            | There is a possibility of that                                                                                                                                                                                                                                                                                                                                                                                                                                                                                                                                                         | Medium    |
| 37                              | 7.03 | Does the taxon have a means of actively attaching itself to hard substrata (e.g. ship hulls, pilings, buoys) such that it enhances the likelihood of dispersal?    | No             | No such fact has been described                                                                                                                                                                                                                                                                                                                                                                                                                                                                                                                                                        | Medium    |
| 38                              | 7.04 | Is natural dispersal of the taxon likely to occur as eggs (for animals) or as propagules (for plants: seeds, spores) in the RA area?                               | Yes            | This species naturally reproduces in the region (Ninua et al. 2013).                                                                                                                                                                                                                                                                                                                                                                                                                                                                                                                   | Medium    |
| 39                              | 7.05 | Is natural dispersal of the taxon likely to occur as larvae/juveniles (for animals) or as fragments/seedlings (for plants) in the RA area?                         | Yes            | This species naturally reproduces in the region (Ninua et al. 2013).                                                                                                                                                                                                                                                                                                                                                                                                                                                                                                                   | Medium    |
| 40                              | 7.06 | Are older life stages of the taxon likely to migrate in the RA area for reproduction?                                                                              | Yes            | This species naturally reproduces in the region (Ninua et al. 2013).                                                                                                                                                                                                                                                                                                                                                                                                                                                                                                                   | High      |
| 41                              | 7.07 | Are propagules or eggs of the taxon likely to be dispersed in the RA area by other animals?                                                                        | Yes            | There is a possibility of that                                                                                                                                                                                                                                                                                                                                                                                                                                                                                                                                                         | Medium    |
| 42                              | 7.08 | Is dispersal of the taxon along any of the vectors/pathways mentioned in the previous seven questions (35-41; i.e. both unintentional or intentional) likely to be | No             | Data deficient                                                                                                                                                                                                                                                                                                                                                                                                                                                                                                                                                                         | Low       |
| 43                              | 7.09 | Is dispersal of the taxon density dependent?                                                                                                                       | Yes            | Own judgement                                                                                                                                                                                                                                                                                                                                                                                                                                                                                                                                                                          | Medium    |
| <b>8. Tolerance attributes</b>  |      |                                                                                                                                                                    |                |                                                                                                                                                                                                                                                                                                                                                                                                                                                                                                                                                                                        |           |
| 44                              | 8.01 | Is the taxon able to withstand being out of water for extended periods (e.g. minimum of one or more hours) at some stage of its life cycle?                        | No             | No such fact has been detected                                                                                                                                                                                                                                                                                                                                                                                                                                                                                                                                                         | High      |



|    |      |                                                                                                                                                                                           |     |                                                                                                                                                                                                                                                                                                                                                                                             |           |
|----|------|-------------------------------------------------------------------------------------------------------------------------------------------------------------------------------------------|-----|---------------------------------------------------------------------------------------------------------------------------------------------------------------------------------------------------------------------------------------------------------------------------------------------------------------------------------------------------------------------------------------------|-----------|
| 45 | 8.02 | Is the taxon tolerant of a wide range of water quality conditions relevant to that taxon? [In the Justification field, indicate the relevant water quality variable(s) being considered.] | Yes | Adults occur in fresh waters, estuaries and coastal seas. Anadromous, with numerous non-anadromous populations in brackish or pure freshwater, rarely in marine waters. In the sea, confined to coastal waters. In freshwater, adults prefer to live in small stream but may occur in a variety of habitats including lakes and large rivers. Inhabit shallow vegetated areas, usually over | Very high |
| 46 | 8.03 | Can the taxon be controlled or eradicated in the wild with chemical, biological, or other agents/means?                                                                                   | Yes | Own judgement                                                                                                                                                                                                                                                                                                                                                                               | Medium    |
| 47 | 8.04 | Is the taxon likely to tolerate or benefit from environmental/human disturbance?                                                                                                          | Yes | This species may be spread by humans                                                                                                                                                                                                                                                                                                                                                        | Medium    |
| 48 | 8.05 | Is the taxon able to tolerate salinity levels that are higher or lower than those found in its usual environment?                                                                         | Yes | Anadromous, with numerous non-anadromous populations of G. aculeatus in brackish or pure freshwater, rarely in marine waters. In the sea, confined to coastal waters.                                                                                                                                                                                                                       | Very high |
| 49 | 8.06 | Are there effective natural enemies (predators) of the taxon present in the RA area?                                                                                                      | Yes | There are many species which can control G. aculeatus population in the region (Esox lucius, Squalius spp, Sander lucioperca, Perca fluviatilis, etc.)                                                                                                                                                                                                                                      | High      |

#### C. Climate change

##### 9. Climate change

|    |      |                                                                                                                                                              |           |               |        |
|----|------|--------------------------------------------------------------------------------------------------------------------------------------------------------------|-----------|---------------|--------|
| 50 | 9.01 | Under the predicted future climatic conditions, are the risks of entry into the RA area posed by the taxon likely to increase, decrease or not change?       | Increase  | Own judgement | Medium |
| 51 | 9.02 | Under the predicted future climatic conditions, are the risks of establishment posed by the taxon likely to increase, decrease or not change?                | Increase  | Own judgement | Medium |
| 52 | 9.03 | Under the predicted future climatic conditions, are the risks of dispersal within the RA area posed by the taxon likely to increase, decrease or not change? | Increase  | Own judgement | Medium |
| 53 | 9.04 | Under the predicted future climatic conditions, what is the likely magnitude of future potential impacts on biodiversity and/or ecological integrity/status? | Higher    | Own judgement | Medium |
| 54 | 9.05 | Under the predicted future climatic conditions, what is the likely magnitude of future potential impacts on ecosystem structure and/or function?             | No change | Own judgement | Medium |
| 55 | 9.06 | Under the predicted future climatic conditions, what is the likely magnitude of future potential impacts on ecosystem services/socio-economic factors?       | Lower     | Own judgement | Medium |

| Statistics                                     |             |
|------------------------------------------------|-------------|
| Scores                                         |             |
| <b>BRA</b>                                     | <b>38.0</b> |
| <b>BRA Outcome</b>                             | <b>-</b>    |
| <b>BRA+CCA</b>                                 | <b>44.0</b> |
| <b>BRA+CCA Outcome</b>                         | <b>-</b>    |
| Score partition                                |             |
| <b>A. Biogeography/Historical</b>              | <b>13.0</b> |
| 1. Domestication/Cultivation                   | 2.0         |
| 2. Climate, distribution and introduction risk | 1.0         |
| 3. Invasive elsewhere                          | 10.0        |
| <b>B. Biology/Ecology</b>                      | <b>25.0</b> |
| 4. Undesirable (or persistence) traits         | 6.0         |
| 5. Resource exploitation                       | 7.0         |
| 6. Reproduction                                | 4.0         |
| 7. Dispersal mechanisms                        | 5.0         |
| 8. Tolerance attributes                        | 3.0         |
| <b>C. Climate change</b>                       | <b>6.0</b>  |
| 9. Climate change                              | 6.0         |
| Answered Questions                             |             |
| <b>Total</b>                                   | <b>55</b>   |
| <b>A. Biogeography/Historical</b>              | <b>13</b>   |
| 1. Domestication/Cultivation                   | 3           |
| 2. Climate, distribution and introduction risk | 5           |
| 3. Invasive elsewhere                          | 5           |
| <b>B. Biology/Ecology</b>                      | <b>36</b>   |
| 4. Undesirable (or persistence) traits         | 12          |
| 5. Resource exploitation                       | 2           |
| 6. Reproduction                                | 7           |
| 7. Dispersal mechanisms                        | 9           |
| 8. Tolerance attributes                        | 6           |
| <b>C. Climate change</b>                       | <b>6</b>    |
| 9. Climate change                              | 6           |
| Sectors affected                               |             |
| <b>Commercial</b>                              | <b>8</b>    |
| <b>Environmental</b>                           | <b>9</b>    |
| <b>Species or population nuisance traits</b>   | <b>29</b>   |

| Thresholds     |          |
|----------------|----------|
| <b>BRA</b>     | <b>-</b> |
| <b>BRA+CCA</b> | <b>-</b> |

| Confidence |         |      |
|------------|---------|------|
|            | BRA+CCA | 0.66 |
|            | BRA     | 0.68 |
|            | CCA     | 0.50 |

| Date and Time |                     |
|---------------|---------------------|
|               | 05/05/2022 16:57:43 |

## AS-ISK v2

| Taxon and Assessor details         |                                                                                                                                       |
|------------------------------------|---------------------------------------------------------------------------------------------------------------------------------------|
| Category                           | Fishes and Lampreys (freshwater)                                                                                                      |
| Taxon name                         | <i>Gasterosteus aculeatus</i>                                                                                                         |
| Common name                        | three-spined stickleback                                                                                                              |
| Assessor                           | Tatia Kuljanishvili                                                                                                                   |
| Risk screening context             |                                                                                                                                       |
| Reason and socio-economic benefits | Gasterosteus aculeatus is native to the Black Sea basin. The building of the Volga-Don canal                                          |
| Risk assessment area               | South Caucasus                                                                                                                        |
| Taxonomy                           | Actinopteri (ray-finned fishes) > Perciformes/Gasterosteidae () > Gasterosteidae                                                      |
| Native range                       | The Black Sea basin                                                                                                                   |
| Introduced range                   | The Caspian Sea basin                                                                                                                 |
| URL                                | <a href="https://www.fishbase.in/summary/Gasterosteus-aculeatus.html">https://www.fishbase.in/summary/Gasterosteus-aculeatus.html</a> |

|                                                |      |                                                                                                                                                                         | Response | Justification (references and/or other information)                                                                                                                                                                                                                                                                                                                                                                                                                                                                                 | Confidence |
|------------------------------------------------|------|-------------------------------------------------------------------------------------------------------------------------------------------------------------------------|----------|-------------------------------------------------------------------------------------------------------------------------------------------------------------------------------------------------------------------------------------------------------------------------------------------------------------------------------------------------------------------------------------------------------------------------------------------------------------------------------------------------------------------------------------|------------|
| A. Biogeography/Historical                     |      |                                                                                                                                                                         |          |                                                                                                                                                                                                                                                                                                                                                                                                                                                                                                                                     |            |
| 1. Domestication/Cultivation                   |      |                                                                                                                                                                         |          |                                                                                                                                                                                                                                                                                                                                                                                                                                                                                                                                     |            |
| 1                                              | 1.01 | Has the taxon been the subject of domestication (or cultivation) for at least 20 generations?                                                                           | No       | The taxon is not the subject of domestication, however it is used as aquarium fish or laboratory animal                                                                                                                                                                                                                                                                                                                                                                                                                             | Medium     |
| 2                                              | 1.02 | Is the taxon harvested in the wild and likely to be sold or used in its live form?                                                                                      | Yes      | It does not have much fisheries value, however it is harvested sometimes for aquariums by local hobbyists or can be harvested for public aquariums. Also, is occasionally taken commercially in Scandinavia and processed into fishmeal and oil                                                                                                                                                                                                                                                                                     | Medium     |
| 3                                              | 1.03 | Does the taxon have invasive races, varieties, sub-taxa or congeners?                                                                                                   | No       | No information available                                                                                                                                                                                                                                                                                                                                                                                                                                                                                                            | High       |
| 2. Climate, distribution and introduction risk |      |                                                                                                                                                                         |          |                                                                                                                                                                                                                                                                                                                                                                                                                                                                                                                                     |            |
| 4                                              | 2.01 | How similar are the climatic conditions of the Risk Assessment (RA) area and the taxon's native range?                                                                  | High     | It is somehow similar.                                                                                                                                                                                                                                                                                                                                                                                                                                                                                                              | High       |
| 5                                              | 2.02 | What is the quality of the climate matching data?                                                                                                                       | Low      | 5. There are no climatic stations in climatch to make this analysis. However, according to Koppen-Geiger map the climate is somehow similar.                                                                                                                                                                                                                                                                                                                                                                                        | High       |
| 6                                              | 2.03 | Is the taxon already present outside of captivity in the RA area?                                                                                                       | Yes      | The building of the Volga-Don canal opened a way for this species to disperse into the Caspian Sea basin (Bogutskaya et al. 2013) and it is now widely distributed throughout the Azerbaijani coast of the Caspian Sea and into the river mouths (Ibrahimov & Mustafayev, 2015). The fish enter the rivers during reproduction (Yusifov et al. 2017).                                                                                                                                                                               | Very high  |
| 7                                              | 2.04 | How many potential vectors could the taxon use to enter in the RA area?                                                                                                 | One      | Self-spreading                                                                                                                                                                                                                                                                                                                                                                                                                                                                                                                      | Very high  |
| 8                                              | 2.05 | Is the taxon currently found in close proximity to, and likely to enter into, the RA area in the near future (e.g. unintentional and intentional introductions)?        | Yes      | It is found around the shorelines of the Caspian Sea in Azerbaijan                                                                                                                                                                                                                                                                                                                                                                                                                                                                  | Very high  |
| 3. Invasive elsewhere                          |      |                                                                                                                                                                         |          |                                                                                                                                                                                                                                                                                                                                                                                                                                                                                                                                     |            |
| 9                                              | 3.01 | Has the taxon become naturalised (established viable populations) outside its introduced range?                                                                         | Yes      | Yes. The taxon has established viable populations.                                                                                                                                                                                                                                                                                                                                                                                                                                                                                  | Very high  |
| 10                                             | 3.02 | In the taxon's introduced range, are there known adverse impacts to wild stocks or commercial taxa?                                                                     | Yes      | It is known that <i>G. aculeatus</i> introduction has been affecting the fishery yields. It has been shown that the species is preying on some native fish larvae such as <i>Rutilus rutilus</i> , <i>Perca fluviatilis</i> and <i>Coregonus lavaretus</i> (Roch et al 2018a). It was also reported that <i>G. aculeatus</i> is in food competition with native whitefish species since it is also feeding on <i>Daphnia</i> (Roch et al 2018a).                                                                                    | High       |
| 11                                             | 3.03 | In the taxon's introduced range, are there known adverse impacts to aquaculture?                                                                                        | Yes      | Roch et al 2018b provided the evidence that <i>G. aculeatus</i> is the reason of the disruption of an entire existing food web and that it has substantially altered existing fish communities, which had the severe consequences for fishery yields.                                                                                                                                                                                                                                                                               | Very high  |
| 12                                             | 3.04 | In the taxon's introduced range, are there known adverse impacts to ecosystem?                                                                                          | Yes      | can be transmitting diseases; is not used in recreational fisheries.                                                                                                                                                                                                                                                                                                                                                                                                                                                                | Low        |
| 13                                             | 3.05 | In the taxon's introduced range, are there known adverse socio-economic impacts?                                                                                        | Yes      | this species had severe consequences for fishery yields in Lake Constance (Roch et al 2018a;b)                                                                                                                                                                                                                                                                                                                                                                                                                                      | Very high  |
| B. Biology/Ecology                             |      |                                                                                                                                                                         |          |                                                                                                                                                                                                                                                                                                                                                                                                                                                                                                                                     |            |
| 4. Undesirable (or persistence) traits         |      |                                                                                                                                                                         |          |                                                                                                                                                                                                                                                                                                                                                                                                                                                                                                                                     |            |
| 14                                             | 4.01 | Is it likely that the taxon will be poisonous or pose other risks to human health?                                                                                      | No       | It is harmless                                                                                                                                                                                                                                                                                                                                                                                                                                                                                                                      | Very high  |
| 15                                             | 4.02 | Is it likely that the taxon will smother one or more native taxa (that are not threatened or protected)?                                                                | Yes      | In Lake Constance it was shown that <i>G. aculeatus</i> introduction has influenced the growth and abundance of native pelagic whitefish (Roch et al 2018b)                                                                                                                                                                                                                                                                                                                                                                         | High       |
| 16                                             | 4.03 | Are there any threatened or protected taxa that the non-native taxon would parasitise in the RA area?                                                                   | No       | Does not parasitise                                                                                                                                                                                                                                                                                                                                                                                                                                                                                                                 | Very high  |
| 17                                             | 4.04 | Is the taxon adaptable in terms of climatic and other environmental conditions, thus enhancing its potential persistence if it has invaded or could invade the RA area? | Yes      | Can tolerate hypoxia because they have ability to decrease metabolic rates during hypoxia (Regan et al 2017). Besides, <i>G. aculeatus</i> inhabit a range of environments with variable salinity and thermal stability and in addition since this species has both, marine and freshwater populations and are known to have invaded freshwater habitats by marine populations some time ago following the recession of the Pleistocene glaciers, they are quite adaptable to the novel conditions and are very much cold tolerant. | Very high  |
| 18                                             | 4.05 | Is the taxon likely to disrupt food-web structure/function in aquatic ecosystems if it has invaded or is likely to invade the RA area?                                  | Yes      | The impact of <i>G. aculeatus</i> in Azerbaijan has not been documented, however according to the research from other countries of similar climate it is quite likely                                                                                                                                                                                                                                                                                                                                                               | High       |

|                                 |      |                                                                                                                                                                              |                |                                                                                                                                                                                                                                                                                                                         |           |
|---------------------------------|------|------------------------------------------------------------------------------------------------------------------------------------------------------------------------------|----------------|-------------------------------------------------------------------------------------------------------------------------------------------------------------------------------------------------------------------------------------------------------------------------------------------------------------------------|-----------|
| 19                              | 4.06 | Is the taxon likely to exert adverse impacts on ecosystem services in the RA area?                                                                                           | Yes            | May decrease fishery yields                                                                                                                                                                                                                                                                                             | Medium    |
| 20                              | 4.07 | Is it likely that the taxon will host, and/or act as a vector for, recognised pests and infectious agents that are endemic in the RA area?                                   | Not applicable | Nothing is known about this                                                                                                                                                                                                                                                                                             | Low       |
| 21                              | 4.08 | Is it likely that the taxon will host, and/or act as a vector for, recognised pests and infectious agents that are absent from (novel to) the RA area?                       | Yes            | It is possible                                                                                                                                                                                                                                                                                                          | Low       |
| 22                              | 4.09 | Is it likely that the taxon will achieve a body size that will make it more likely to be released from captivity?                                                            | No             | This species is a small sized animal                                                                                                                                                                                                                                                                                    | High      |
| 23                              | 4.10 | Is the taxon capable of sustaining itself in a range of water velocity conditions (e.g. versatile in habitat use)?                                                           | Yes            | This species present themselves as anadromous, inhabiting different water environments: marine, coastal, riverine and even lakes.                                                                                                                                                                                       | High      |
| 24                              | 4.11 | Is it likely that the taxon's mode of existence (e.g. excretion of by-products) or behaviours (e.g. feeding) will reduce habitat quality for native taxa?                    | No             | does not reduce the habitat quality for natives                                                                                                                                                                                                                                                                         | High      |
| 25                              | 4.12 | Is the taxon likely to maintain a viable population even when present in low densities (or persisting in adverse conditions by way of a dormant form)?                       | No             | Not known                                                                                                                                                                                                                                                                                                               | Low       |
| <b>5. Resource exploitation</b> |      |                                                                                                                                                                              |                |                                                                                                                                                                                                                                                                                                                         |           |
| 26                              | 5.01 | Is the taxon likely to consume threatened or protected native taxa in the RA area?                                                                                           | Yes            | It can be predator of native pelagic fish larvae. Also can be in competition with them for food                                                                                                                                                                                                                         | High      |
| 27                              | 5.02 | Is the taxon likely to sequester food resources (including nutrients) to the detriment of native taxa in the RA area?                                                        | Yes            | Eats, worms, small crustaceans, larvae and adult aquatic insects, drowned aerial insects, fish larvae and small fishes                                                                                                                                                                                                  | High      |
| <b>6. Reproduction</b>          |      |                                                                                                                                                                              |                |                                                                                                                                                                                                                                                                                                                         |           |
| 28                              | 6.01 | Is the taxon likely to exhibit parental care and/or to reduce age-at-maturity in response to environmental conditions?                                                       | Yes            | Males build nests and they guard and ventilate the eggs and young.                                                                                                                                                                                                                                                      | Very high |
| 29                              | 6.02 | Is the taxon likely to produce viable gametes or propagules (in the RA area)?                                                                                                | Yes            | Yes and it has been successfully reproducing since its introduction                                                                                                                                                                                                                                                     | Very high |
| 30                              | 6.03 | Is the taxon likely to hybridise naturally with native taxa?                                                                                                                 | No             | No information available                                                                                                                                                                                                                                                                                                | Very high |
| 31                              | 6.04 | Is the taxon likely to be hermaphroditic or to display asexual reproduction?                                                                                                 | No             | No. Does not display asexual reproduction                                                                                                                                                                                                                                                                               | Very high |
| 32                              | 6.05 | Is the taxon dependent on the presence of another taxon (or specific habitat features) to complete its life cycle?                                                           | No             | No See: <a href="https://www.fishbase.de/summary/Gasterosteus-aculeatus.html">https://www.fishbase.de/summary/Gasterosteus-aculeatus.html</a>                                                                                                                                                                           | Very high |
| 33                              | 6.06 | Is the taxon known (or likely) to produce a large number of propagules or offspring within a short time span (e.g. < 1 year)?                                                | Yes            | "Anadromous forms usually die of exhaustion after spawning cycle. Freshwater individuals are able to complete several cycles within one year or sometimes over several years "<br><a href="https://www.fishbase.in/summary/Gasterosteus-aculeatus.html">https://www.fishbase.in/summary/Gasterosteus-aculeatus.html</a> | Very high |
| 34                              | 6.07 | How many time units (days, months, years) does the taxon require to reach the age-at-first-reproduction?                                                                     | 1              | 1 year                                                                                                                                                                                                                                                                                                                  | Very high |
| <b>7. Dispersal mechanisms</b>  |      |                                                                                                                                                                              |                |                                                                                                                                                                                                                                                                                                                         |           |
| 35                              | 7.01 | How many potential internal vectors/pathways could the taxon use to disperse within the RA area (with suitable vectors)?                                                     | One            | Self spreading                                                                                                                                                                                                                                                                                                          | High      |
| 36                              | 7.02 | Will any of these vectors/pathways bring the taxon in close proximity to one or more protected areas (e.g. MCZ, MPA, SSSI)?                                                  | Yes            | It is possible                                                                                                                                                                                                                                                                                                          | Medium    |
| 37                              | 7.03 | Does the taxon have a means of actively attaching itself to hard substrata (e.g. ship hulls, pilings, buoys) such that it enhances the likelihood of dispersal?              | No             | No. does not have morphological characters that will allow it to attach                                                                                                                                                                                                                                                 | Very high |
| 38                              | 7.04 | Is natural dispersal of the taxon likely to occur as eggs (for animals) or as propagules (for plants: seeds, spores) in the RA area?                                         | No             | No. Because eggs are being deposited in the nests which are guarded by the parent unless hatched.                                                                                                                                                                                                                       | Very high |
| 39                              | 7.05 | Is natural dispersal of the taxon likely to occur as larvae/juveniles (for animals) or as fragments/seedlings (for plants) in the RA area?                                   | No             | No. This is less likely                                                                                                                                                                                                                                                                                                 | High      |
| 40                              | 7.06 | Are older life stages of the taxon likely to migrate in the RA area for reproduction?                                                                                        | Yes            | It is anadromous species which migrates in the freshwaters for reproduction                                                                                                                                                                                                                                             | Very high |
| 41                              | 7.07 | Are propagules or eggs of the taxon likely to be dispersed in the RA area by other animals?                                                                                  | No             | No                                                                                                                                                                                                                                                                                                                      | Very high |
| 42                              | 7.08 | Is dispersal of the taxon along any of the vectors/pathways mentioned in the previous seven questions (35–41; i.e. both unintentional or intentional) likely to be           | Yes            | No information about it                                                                                                                                                                                                                                                                                                 | Low       |
| 43                              | 7.09 | Is dispersal of the taxon density dependent?                                                                                                                                 | No             | No documented evidence                                                                                                                                                                                                                                                                                                  | High      |
| <b>8. Tolerance attributes</b>  |      |                                                                                                                                                                              |                |                                                                                                                                                                                                                                                                                                                         |           |
| 44                              | 8.01 | Is the taxon able to withstand being out of water for extended periods (e.g. minimum of one or more hours) at some stage of its life cycle?                                  | No             | No information available                                                                                                                                                                                                                                                                                                | High      |
| 45                              | 8.02 | Is the taxon tolerant of a wide range of water quality conditions relevant to that taxon? [In the Justification field, indicate the relevant water quality variable(s) being | Yes            | can tolerate different ranges of salinity and oxygen                                                                                                                                                                                                                                                                    | High      |

|                          |      |                                                                                                                                                              |           |                                                                                                                                                                                                                                                      |        |
|--------------------------|------|--------------------------------------------------------------------------------------------------------------------------------------------------------------|-----------|------------------------------------------------------------------------------------------------------------------------------------------------------------------------------------------------------------------------------------------------------|--------|
| 46                       | 8.03 | Can the taxon be controlled or eradicated in the wild with chemical, biological, or other agents/means?                                                      | No        | No. This is less likely.                                                                                                                                                                                                                             | High   |
| 47                       | 8.04 | Is the taxon likely to tolerate or benefit from environmental/human disturbance?                                                                             | No        | No information available                                                                                                                                                                                                                             | High   |
| 48                       | 8.05 | Is the taxon able to tolerate salinity levels that are higher or lower than those found in its usual environment?                                            | Yes       | This species do well on higher salinity levels (Metzger et al 2016)                                                                                                                                                                                  | Medium |
| 49                       | 8.06 | Are there effective natural enemies (predators) of the taxon present in the RA                                                                               | No        | No. No effective natural enemies present in RA area                                                                                                                                                                                                  | High   |
| <b>C. Climate change</b> |      |                                                                                                                                                              |           |                                                                                                                                                                                                                                                      |        |
| <b>9. Climate change</b> |      |                                                                                                                                                              |           |                                                                                                                                                                                                                                                      |        |
| 50                       | 9.01 | Under the predicted future climatic conditions, are the risks of entry into the RA area posed by the taxon likely to increase, decrease or not change?       | Increase  | It was hypothesized that climate change might alert the mechanisms of transportation and introduction of non-native species. Commercial and recreational activities will increase, that itself increases the propagule pressure levels of non-native | High   |
| 51                       | 9.02 | Under the predicted future climatic conditions, are the risks of establishment posed by the taxon likely to increase, decrease or not change?                | Increase  | Since this species has high thermal tolerance, the risks of its establishment might increase                                                                                                                                                         | High   |
| 52                       | 9.03 | Under the predicted future climatic conditions, are the risks of dispersal within the RA area posed by the taxon likely to increase, decrease or not change? | No change | No informatio. probably no change                                                                                                                                                                                                                    | Low    |
| 53                       | 9.04 | Under the predicted future climatic conditions, what is the likely magnitude of future potential impacts on biodiversity and/or ecological integrity/status? | No change | No change                                                                                                                                                                                                                                            | High   |
| 54                       | 9.05 | Under the predicted future climatic conditions, what is the likely magnitude of future potential impacts on ecosystem structure and/or function?             | No change | No change                                                                                                                                                                                                                                            | Medium |
| 55                       | 9.06 | Under the predicted future climatic conditions, what is the likely magnitude of future potential impacts on ecosystem services/socio-economic factors?       | No change | No change                                                                                                                                                                                                                                            | Medium |

| Statistics                                     |             |
|------------------------------------------------|-------------|
| Scores                                         |             |
| <b>BRA</b>                                     | <b>37.0</b> |
| <b>BRA Outcome</b>                             | <b>-</b>    |
| <b>BRA+CCA</b>                                 | <b>41.0</b> |
| <b>BRA+CCA Outcome</b>                         | <b>-</b>    |
| Score partition                                |             |
| <b>A. Biogeography/Historical</b>              | <b>19.0</b> |
| 1. Domestication/Cultivation                   | 0.0         |
| 2. Climate, distribution and introduction risk | 1.0         |
| 3. Invasive elsewhere                          | 18.0        |
| <b>B. Biology/Ecology</b>                      | <b>18.0</b> |
| 4. Undesirable (or persistence) traits         | 6.0         |
| 5. Resource exploitation                       | 7.0         |
| 6. Reproduction                                | 3.0         |
| 7. Dispersal mechanisms                        | -1.0        |
| 8. Tolerance attributes                        | 3.0         |
| <b>C. Climate change</b>                       | <b>4.0</b>  |
| 9. Climate change                              | 4.0         |
| Answered Questions                             |             |
| <b>Total</b>                                   | <b>55</b>   |
| <b>A. Biogeography/Historical</b>              | <b>13</b>   |
| 1. Domestication/Cultivation                   | 3           |
| 2. Climate, distribution and introduction risk | 5           |
| 3. Invasive elsewhere                          | 5           |
| <b>B. Biology/Ecology</b>                      | <b>36</b>   |
| 4. Undesirable (or persistence) traits         | 12          |
| 5. Resource exploitation                       | 2           |
| 6. Reproduction                                | 7           |
| 7. Dispersal mechanisms                        | 9           |
| 8. Tolerance attributes                        | 6           |
| <b>C. Climate change</b>                       | <b>6</b>    |
| 9. Climate change                              | 6           |
| Sectors affected                               |             |
| <b>Commercial</b>                              | <b>15</b>   |
| <b>Environmental</b>                           | <b>12</b>   |
| <b>Species or population nuisance traits</b>   | <b>17</b>   |

| Thresholds     |             |
|----------------|-------------|
| <b>BRA</b>     | <b>-</b>    |
| <b>BRA+CCA</b> | <b>-</b>    |
| Confidence     |             |
| <b>BRA+CCA</b> | <b>0.75</b> |
| <b>BRA</b>     | <b>0.78</b> |
| <b>CCA</b>     | <b>0.58</b> |

| Date and Time       |
|---------------------|
| 21/05/2022 14:07:30 |

## AS-ISK v2

| Taxon and Assessor details         |                                                                                                                           |
|------------------------------------|---------------------------------------------------------------------------------------------------------------------------|
| Category                           | Fishes and Lampreys (freshwater)                                                                                          |
| Taxon name                         | <i>Gobio artvinicus</i>                                                                                                   |
| Common name                        | Artvin gudgeon                                                                                                            |
| Assessor                           | Bella Japoshvili                                                                                                          |
| Risk screening context             |                                                                                                                           |
| Reason and socio-economic benefits | This species is reported from the east South Caucasus area as an introduced species.                                      |
| Risk assessment area               | South Caucasus                                                                                                            |
| Taxonomy                           | Actinopteri (ray-finned fishes) > Cypriniformes (Carps) > Gobionidae (Gudgeons)                                           |
| Native range                       | South-eastern Black Sea basin                                                                                             |
| Introduced range                   | Kura River basin                                                                                                          |
| URL                                | <a href="https://www.fishbase.de/summary/Gobio-artvinicus.html">https://www.fishbase.de/summary/Gobio-artvinicus.html</a> |

|                                                |      | Response                                                                                                                                                                | Justification (references and/or other information) | Confidence                                                                                                                                                                                                                                                                                         |           |
|------------------------------------------------|------|-------------------------------------------------------------------------------------------------------------------------------------------------------------------------|-----------------------------------------------------|----------------------------------------------------------------------------------------------------------------------------------------------------------------------------------------------------------------------------------------------------------------------------------------------------|-----------|
| A. Biogeography/Historical                     |      |                                                                                                                                                                         |                                                     |                                                                                                                                                                                                                                                                                                    |           |
| 1. Domestication/Cultivation                   |      |                                                                                                                                                                         |                                                     |                                                                                                                                                                                                                                                                                                    |           |
| 1                                              | 1.01 | Has the taxon been the subject of domestication (or cultivation) for at least 20 generations?                                                                           | No                                                  | Low economic value, not used in aquaculture/captivity                                                                                                                                                                                                                                              | Very high |
| 2                                              | 1.02 | Is the taxon harvested in the wild and likely to be sold or used in its live form?                                                                                      | No                                                  | Not an ornamental fish and not any economic value                                                                                                                                                                                                                                                  | High      |
| 3                                              | 1.03 | Does the taxon have invasive races, varieties, sub-taxa or congeners?                                                                                                   | Yes                                                 | Congeners are known to be invasive                                                                                                                                                                                                                                                                 | High      |
| 2. Climate, distribution and introduction risk |      |                                                                                                                                                                         |                                                     |                                                                                                                                                                                                                                                                                                    |           |
| 4                                              | 2.01 | How similar are the climatic conditions of the Risk Assessment (RA) area and the taxon's native range?                                                                  | Medium                                              | Results of climatch                                                                                                                                                                                                                                                                                | Low       |
| 5                                              | 2.02 | What is the quality of the climate matching data?                                                                                                                       | Low                                                 | Low quality of local climate data                                                                                                                                                                                                                                                                  | High      |
| 6                                              | 2.03 | Is the taxon already present outside of captivity in the RA area?                                                                                                       | Yes                                                 | Kuljanishvili, T., Mumladze, L., Japoshvili, B., Mustafayev, N., Ibrahimov, S., Patoka, J., ... & Kalous, L. (2021). The first unified inventory of non-native fishes of the South Caucasian countries, Armenia, Azerbaijan, and Georgia. Knowledge & Management of Aquatic Ecosystems, (422), 32. | Very high |
| 7                                              | 2.04 | How many potential vectors could the taxon use to enter in the RA area?                                                                                                 | None                                                | Human mediated translocation                                                                                                                                                                                                                                                                       | Medium    |
| 8                                              | 2.05 | Is the taxon currently found in close proximity to, and likely to enter into, the RA area in the near future (e.g. unintentional and intentional introductions)?        | Yes                                                 | Kuljanishvili, T., Mumladze, L., Japoshvili, B., Mustafayev, N., Ibrahimov, S., Patoka, J., ... & Kalous, L. (2021). The first unified inventory of non-native fishes of the South Caucasian countries, Armenia, Azerbaijan, and Georgia. Knowledge & Management of Aquatic Ecosystems, (422), 32. | Very high |
| 3. Invasive elsewhere                          |      |                                                                                                                                                                         |                                                     |                                                                                                                                                                                                                                                                                                    |           |
| 9                                              | 3.01 | Has the taxon become naturalised (established viable populations) outside its native range?                                                                             | Yes                                                 | Kuljanishvili, T., Mumladze, L., Japoshvili, B., Mustafayev, N., Ibrahimov, S., Patoka, J., ... & Kalous, L. (2021). The first unified inventory of non-native fishes of the South Caucasian countries, Armenia, Azerbaijan, and Georgia. Knowledge & Management of Aquatic Ecosystems, (422), 32. | Very high |
| 10                                             | 3.02 | In the taxon's introduced range, are there known adverse impacts to wild stocks or commercial taxa?                                                                     | No                                                  | No documented evidence. Guessed                                                                                                                                                                                                                                                                    | High      |
| 11                                             | 3.03 | In the taxon's introduced range, are there known adverse impacts to aquaculture?                                                                                        | No                                                  | No documented evidence. Guessed                                                                                                                                                                                                                                                                    | High      |
| 12                                             | 3.04 | In the taxon's introduced range, are there known adverse impacts to ecosystem                                                                                           | No                                                  | No documented evidence. Guessed                                                                                                                                                                                                                                                                    | High      |
| 13                                             | 3.05 | In the taxon's introduced range, are there known adverse socio-economic impacts?                                                                                        | No                                                  | No documented evidence. Guessed                                                                                                                                                                                                                                                                    | High      |
| B. Biology/Ecology                             |      |                                                                                                                                                                         |                                                     |                                                                                                                                                                                                                                                                                                    |           |
| 4. Undesirable (or persistence) traits         |      |                                                                                                                                                                         |                                                     |                                                                                                                                                                                                                                                                                                    |           |
| 14                                             | 4.01 | Is it likely that the taxon will be poisonous or pose other risks to human health?                                                                                      | No                                                  | No documented evidence. Guessed                                                                                                                                                                                                                                                                    | High      |
| 15                                             | 4.02 | Is it likely that the taxon will smother one or more native taxa (that are not threatened or protected)?                                                                | Yes                                                 | No documented evidence. Guessed                                                                                                                                                                                                                                                                    | Medium    |
| 16                                             | 4.03 | Are there any threatened or protected taxa that the non-native taxon would parasitise in the RA area?                                                                   | No                                                  | No documented evidence. Guessed                                                                                                                                                                                                                                                                    | High      |
| 17                                             | 4.04 | Is the taxon adaptable in terms of climatic and other environmental conditions, thus enhancing its potential persistence if it has invaded or could invade the RA area? | No                                                  | No documented evidence. Guessed                                                                                                                                                                                                                                                                    | Low       |
| 18                                             | 4.05 | Is the taxon likely to disrupt food-web structure/function in aquatic ecosystems if it has invaded or is likely to invade the RA                                        | No                                                  | No documented evidence. Guessed                                                                                                                                                                                                                                                                    | Low       |
| 19                                             | 4.06 | Is the taxon likely to exert adverse impacts on ecosystem services in the RA area?                                                                                      | No                                                  | No documented evidence. Guessed                                                                                                                                                                                                                                                                    | Low       |
| 20                                             | 4.07 | Is it likely that the taxon will host, and/or act as a vector for, recognised pests and infectious agents that are endemic in the RA                                    | No                                                  | No endemic pests or infectious agents are known from the RA area                                                                                                                                                                                                                                   | Medium    |
| 21                                             | 4.08 | Is it likely that the taxon will host, and/or act as a vector for, recognised pests and infectious agents that are absent from (novel to) the RA area?                  | Yes                                                 | No documented evidence. Guessed                                                                                                                                                                                                                                                                    | Medium    |

|                                 |      |                                                                                                                                                                              |     |                                                                                                                                                                                                                                                                                                    |           |
|---------------------------------|------|------------------------------------------------------------------------------------------------------------------------------------------------------------------------------|-----|----------------------------------------------------------------------------------------------------------------------------------------------------------------------------------------------------------------------------------------------------------------------------------------------------|-----------|
| 22                              | 4.09 | Is it likely that the taxon will achieve a body size that will make it more likely to be released from captivity?                                                            | No  | Species is not kept in captivity                                                                                                                                                                                                                                                                   | Very high |
| 23                              | 4.10 | Is the taxon capable of sustaining itself in a range of water velocity conditions (e.g. versatile in habitat use)?                                                           | Yes | No documented evidence. Guessed                                                                                                                                                                                                                                                                    | High      |
| 24                              | 4.11 | Is it likely that the taxon's mode of existence (e.g. excretion of by-products) or behaviours (e.g. feeding) will reduce habitat quality for native taxa?                    | No  | No documented evidence. Guessed                                                                                                                                                                                                                                                                    | Low       |
| 25                              | 4.12 | Is the taxon likely to maintain a viable population even when present in low densities (or persisting in adverse conditions by way of a dormant form)?                       | No  | No documented evidence. Guessed                                                                                                                                                                                                                                                                    | Low       |
| <b>5. Resource exploitation</b> |      |                                                                                                                                                                              |     |                                                                                                                                                                                                                                                                                                    |           |
| 26                              | 5.01 | Is the taxon likely to consume threatened or protected native taxa in the RA area?                                                                                           | No  | No documented evidence. Guessed                                                                                                                                                                                                                                                                    | Low       |
| 27                              | 5.02 | Is the taxon likely to sequester food resources (including nutrients) to the detriment of native taxa in the RA area?                                                        | Yes | No documented evidence. Guessed                                                                                                                                                                                                                                                                    | Low       |
| <b>6. Reproduction</b>          |      |                                                                                                                                                                              |     |                                                                                                                                                                                                                                                                                                    |           |
| 28                              | 6.01 | Is the taxon likely to exhibit parental care and/or to reduce age-at-maturity in response to environmental conditions?                                                       | No  | No documented evidence. Guessed                                                                                                                                                                                                                                                                    | Medium    |
| 29                              | 6.02 | Is the taxon likely to produce viable gametes or propagules (in the RA area)?                                                                                                | Yes | Kuljanishvili, T., Mumladze, L., Japoshvili, B., Mustafayev, N., Ibrahimov, S., Patoka, J., ... & Kalous, L. (2021). The first unified inventory of non-native fishes of the South Caucasian countries, Armenia, Azerbaijan, and Georgia. Knowledge & Management of Aquatic Ecosystems, (422), 32. | High      |
| 30                              | 6.03 | Is the taxon likely to hybridise naturally with native taxa?                                                                                                                 | No  | No documented evidence. Guessed                                                                                                                                                                                                                                                                    | Medium    |
| 31                              | 6.04 | Is the taxon likely to be hermaphroditic or to display asexual reproduction?                                                                                                 | Yes | No documented evidence. Guessed                                                                                                                                                                                                                                                                    | Low       |
| 32                              | 6.05 | Is the taxon dependent on the presence of another taxon (or specific habitat features) to complete its life cycle?                                                           | No  | No documented evidence. Guessed                                                                                                                                                                                                                                                                    | High      |
| 33                              | 6.06 | Is the taxon known (or likely) to produce a large number of propagules or offspring within a short time span (e.g. < 1 year)?                                                | Yes | No documented evidence. Guessed                                                                                                                                                                                                                                                                    | Low       |
| 34                              | 6.07 | How many time units (days, months, years) does the taxon require to reach the age-at-first-reproduction?                                                                     | 1   | Years                                                                                                                                                                                                                                                                                              | Low       |
| <b>7. Dispersal mechanisms</b>  |      |                                                                                                                                                                              |     |                                                                                                                                                                                                                                                                                                    |           |
| 35                              | 7.01 | How many potential internal vectors/pathways could the taxon use to disperse within the RA area (with suitable)                                                              | One | Human mediated translocation                                                                                                                                                                                                                                                                       | Medium    |
| 36                              | 7.02 | Will any of these vectors/pathways bring the taxon in close proximity to one or more protected areas (e.g. MCZ, MPA, SSSI)?                                                  | Yes | Already in RA area (Kuljanishvili et al., 2021)                                                                                                                                                                                                                                                    | Very high |
| 37                              | 7.03 | Does the taxon have a means of actively attaching itself to hard substrata (e.g. ship hulls, pilings, buoys) such that it enhances the likelihood of dispersal?              | No  | No documented evidence. Guessed                                                                                                                                                                                                                                                                    | High      |
| 38                              | 7.04 | Is natural dispersal of the taxon likely to occur as eggs (for animals) or as propagules (for plants: seeds, spores) in the RA area?                                         | No  | No documented evidence. Guessed                                                                                                                                                                                                                                                                    | High      |
| 39                              | 7.05 | Is natural dispersal of the taxon likely to occur as larvae/juveniles (for animals) or as fragments/seedlings (for plants) in the RA area?                                   | Yes | No documented evidence. Guessed                                                                                                                                                                                                                                                                    | Medium    |
| 40                              | 7.06 | Are older life stages of the taxon likely to migrate in the RA area for reproduction?                                                                                        | No  | No documented evidence. Guessed                                                                                                                                                                                                                                                                    | High      |
| 41                              | 7.07 | Are propagules or eggs of the taxon likely to be dispersed in the RA area by other animals?                                                                                  | No  | No documented evidence. Guessed                                                                                                                                                                                                                                                                    | Medium    |
| 42                              | 7.08 | Is dispersal of the taxon along any of the vectors/pathways mentioned in the previous seven questions (35-41; i.e. both unintentional or intentional) likely to be           | Yes | In that case starting point is located in RA area from which other parts of the RA area are accessible through the river system. No documented evidence. Guessed                                                                                                                                   | Medium    |
| 43                              | 7.09 | Is dispersal of the taxon density dependent?                                                                                                                                 | No  | No documented evidence. Guessed                                                                                                                                                                                                                                                                    | Low       |
| <b>8. Tolerance attributes</b>  |      |                                                                                                                                                                              |     |                                                                                                                                                                                                                                                                                                    |           |
| 44                              | 8.01 | Is the taxon able to withstand being out of water for extended periods (e.g. minimum of one or more hours) at some stage of its life cycle?                                  | No  | No documented evidence. Guessed                                                                                                                                                                                                                                                                    | Low       |
| 45                              | 8.02 | Is the taxon tolerant of a wide range of water quality conditions relevant to that taxon? [In the Justification field, indicate the relevant water quality variable(s) being | No  | No documented evidence. Guessed                                                                                                                                                                                                                                                                    | Low       |
| 46                              | 8.03 | Can the taxon be controlled or eradicated in the wild with chemical, biological, or other agents/means?                                                                      | No  | No such a practice exists                                                                                                                                                                                                                                                                          | Low       |
| 47                              | 8.04 | Is the taxon likely to tolerate or benefit from environmental/human disturbance?                                                                                             | No  | No documented evidence. Guessed                                                                                                                                                                                                                                                                    | Medium    |

|                          |      |                                                                                                                                                              |           |                                 |        |
|--------------------------|------|--------------------------------------------------------------------------------------------------------------------------------------------------------------|-----------|---------------------------------|--------|
| 48                       | 8.05 | Is the taxon able to tolerate salinity levels that are higher or lower than those found in its usual environment?                                            | No        | No documented evidence. Guessed | Medium |
| 49                       | 8.06 | Are there effective natural enemies (predators) of the taxon present in the RA                                                                               | No        | No documented evidence. Guessed | Low    |
| <b>C. Climate change</b> |      |                                                                                                                                                              |           |                                 |        |
| <b>9. Climate change</b> |      |                                                                                                                                                              |           |                                 |        |
| 50                       | 9.01 | Under the predicted future climatic conditions, are the risks of entry into the RA area posed by the taxon likely to increase, decrease or not change?       | No change | Based on professional judgment  | Low    |
| 51                       | 9.02 | Under the predicted future climatic conditions, are the risks of establishment posed by the taxon likely to increase, decrease or not change?                | No change | Based on professional judgment  | Low    |
| 52                       | 9.03 | Under the predicted future climatic conditions, are the risks of dispersal within the RA area posed by the taxon likely to increase, decrease or not change? | No change | Based on professional judgment  | Low    |
| 53                       | 9.04 | Under the predicted future climatic conditions, what is the likely magnitude of future potential impacts on biodiversity and/or ecological integrity/status? | No change | Based on professional judgment  | Low    |
| 54                       | 9.05 | Under the predicted future climatic conditions, what is the likely magnitude of future potential impacts on ecosystem structure and/or function?             | No change | Based on professional judgment  | Low    |
| 55                       | 9.06 | Under the predicted future climatic conditions, what is the likely magnitude of future potential impacts on ecosystem services/socio-economic factors?       | No change | Based on professional judgment  | Low    |

| Statistics                                     |            |
|------------------------------------------------|------------|
| Scores                                         |            |
| <b>BRA</b>                                     | <b>7.0</b> |
| <b>BRA Outcome</b>                             | <b>-</b>   |
| <b>BRA+CCA</b>                                 | <b>7.0</b> |
| <b>BRA+CCA Outcome</b>                         | <b>-</b>   |
| Score partition                                |            |
| <b>A. Biogeography/Historical</b>              | <b>2.0</b> |
| 1. Domestication/Cultivation                   | 0.0        |
| 2. Climate, distribution and introduction risk | 0.0        |
| 3. Invasive elsewhere                          | 2.0        |
| <b>B. Biology/Ecology</b>                      | <b>5.0</b> |
| 4. Undesirable (or persistence) traits         | 2.0        |
| 5. Resource exploitation                       | 2.0        |
| 6. Reproduction                                | 4.0        |
| 7. Dispersal mechanisms                        | -1.0       |
| 8. Tolerance attributes                        | -2.0       |
| <b>C. Climate change</b>                       | <b>0.0</b> |
| 9. Climate change                              | 0.0        |
| Answered Questions                             |            |
| <b>Total</b>                                   | <b>55</b>  |
| <b>A. Biogeography/Historical</b>              | <b>13</b>  |
| 1. Domestication/Cultivation                   | 3          |
| 2. Climate, distribution and introduction risk | 5          |
| 3. Invasive elsewhere                          | 5          |
| <b>B. Biology/Ecology</b>                      | <b>36</b>  |
| 4. Undesirable (or persistence) traits         | 12         |
| 5. Resource exploitation                       | 2          |
| 6. Reproduction                                | 7          |
| 7. Dispersal mechanisms                        | 9          |
| 8. Tolerance attributes                        | 6          |
| <b>C. Climate change</b>                       | <b>6</b>   |
| 9. Climate change                              | 6          |
| Sectors affected                               |            |
| <b>Commercial</b>                              | <b>0</b>   |
| <b>Environmental</b>                           | <b>1</b>   |
| <b>Species or population nuisance traits</b>   | <b>8</b>   |

| Thresholds     |             |
|----------------|-------------|
| <b>BRA</b>     | <b>-</b>    |
| <b>BRA+CCA</b> | <b>-</b>    |
| Confidence     |             |
| <b>BRA+CCA</b> | <b>0.52</b> |
| <b>BRA</b>     | <b>0.56</b> |
| <b>CCA</b>     | <b>0.25</b> |

| Date and Time       |
|---------------------|
| 16/05/2022 12:25:26 |



## AS-ISK v2

| Taxon and Assessor details         |                                                                                                                           |
|------------------------------------|---------------------------------------------------------------------------------------------------------------------------|
| Category                           | Fishes and Lampreys (freshwater)                                                                                          |
| Taxon name                         | <i>Gobio artvinicus</i>                                                                                                   |
| Common name                        | Artvin gudgeon                                                                                                            |
| Assessor                           | Giorgi Epatashvili                                                                                                        |
| Risk screening context             |                                                                                                                           |
| Reason and socio-economic benefits | Gobio artvinicus is a small sized species of gudgeon, distributed in Turkey and Georgia. This                             |
| Risk assessment area               | South Caucasus                                                                                                            |
| Taxonomy                           | Gobio artvinicus Turan, Japoshvili, Aksu & Bektaş 2016                                                                    |
| Native range                       | Aralık and Çifteköprü streams, tributaries of the lower part of Çoruh River, Black Sea basin in                           |
| Introduced range                   | According to Kuljanishvili et al. (2020) Gobio artvinicus is translocated within the South Caucasus                       |
| URL                                | <a href="https://www.fishbase.se/summary/Gobio-artvinicus.html">https://www.fishbase.se/summary/Gobio-artvinicus.html</a> |

|                                                |      | Response                                                                                                                                                                | Justification (references and/or other information) | Confidence                                                                                                                                               |           |
|------------------------------------------------|------|-------------------------------------------------------------------------------------------------------------------------------------------------------------------------|-----------------------------------------------------|----------------------------------------------------------------------------------------------------------------------------------------------------------|-----------|
| A. Biogeography/Historical                     |      |                                                                                                                                                                         |                                                     |                                                                                                                                                          |           |
| 1. Domestication/Cultivation                   |      |                                                                                                                                                                         |                                                     |                                                                                                                                                          |           |
| 1                                              | 1.01 | Has the taxon been the subject of domestication (or cultivation) for at least 20 generations?                                                                           | No                                                  | Gobio artvinicus is a newly discribed small sized species. It has not commercial value.                                                                  | Very high |
| 2                                              | 1.02 | Is the taxon harvested in the wild and likely to be sold or used in its live form?                                                                                      | No                                                  | Gobio artvinicus is a newly discribed small sized fish and has not commercial value.                                                                     | Medium    |
| 3                                              | 1.03 | Does the taxon have invasive races, varieties, sub-taxa or congeners?                                                                                                   | No                                                  | Although the species was translocated to the Caucasus region, no such fact has been discribed yet                                                        | Medium    |
| 2. Climate, distribution and introduction risk |      |                                                                                                                                                                         |                                                     |                                                                                                                                                          |           |
| 4                                              | 2.01 | How similar are the climatic conditions of the Risk Assessment (RA) area and the taxon's native range?                                                                  | High                                                | This species is naturally distributed in the Caucasus region (Kuljanishvili et al. 2020).                                                                | Very high |
| 5                                              | 2.02 | What is the quality of the climate matching data?                                                                                                                       | High                                                | This species is naturally distributed in the Caucasus region (Kuljanishvili et al. 2020).                                                                | Very high |
| 6                                              | 2.03 | Is the taxon already present outside of captivity in the RA area?                                                                                                       | Yes                                                 | This species is naturally distributed in the Caucasus region (Kuljanishvili et al. 2020)                                                                 | Very high |
| 7                                              | 2.04 | How many potential vectors could the taxon use to enter in the RA area?                                                                                                 | >1                                                  | This species is distributed in the region naturally and also accidentally spread by humans through translocations                                        | Very high |
| 8                                              | 2.05 | Is the taxon currently found in close proximity to, and likely to enter into, the RA area in the near future (e.g. unintentional and intentional introductions)?        | Yes                                                 | This species is naturally distributed in Çoruh River, Black Sea basin in Turkey (Turan et al. 2016).                                                     | Very high |
| 3. Invasive elsewhere                          |      |                                                                                                                                                                         |                                                     |                                                                                                                                                          |           |
| 9                                              | 3.01 | Has the taxon become naturalised (established viable populations) outside its                                                                                           | Yes                                                 | This species was spread in eastern part of the Caucasus region (Caspian Basin) and it appears to have viable populations here.                           | High      |
| 10                                             | 3.02 | In the taxon's introduced range, are there known adverse impacts to wild stocks or commercial taxa?                                                                     | No                                                  | No such fact has been discribed                                                                                                                          | Medium    |
| 11                                             | 3.03 | In the taxon's introduced range, are there known adverse impacts to aquaculture?                                                                                        | No                                                  | No such fact has been discribed                                                                                                                          | Medium    |
| 12                                             | 3.04 | In the taxon's introduced range, are there known adverse impacts to ecosystem                                                                                           | No                                                  | No such fact has been detected                                                                                                                           | Medium    |
| 13                                             | 3.05 | In the taxon's introduced range, are there known adverse socio-economic impacts?                                                                                        | No                                                  | No such fact has been detected                                                                                                                           | Medium    |
| B. Biology/Ecology                             |      |                                                                                                                                                                         |                                                     |                                                                                                                                                          |           |
| 4. Undesirable (or persistence) traits         |      |                                                                                                                                                                         |                                                     |                                                                                                                                                          |           |
| 14                                             | 4.01 | Is it likely that the taxon will be poisonous or pose other risks to human health?                                                                                      | No                                                  | This species does not pose a threat to humans                                                                                                            | Very high |
| 15                                             | 4.02 | Is it likely that the taxon will smother one or more native taxa (that are not threatened or protected)?                                                                | No                                                  | No such fact has been detected                                                                                                                           | Medium    |
| 16                                             | 4.03 | Are there any threatened or protected taxa that the non-native taxon would parasitise in the RA area?                                                                   | Yes                                                 | There is a possibility of that. In the Caucasus region there are distributed several threatened and protected species such as sturgeons, Salmo spp, etc. | Medium    |
| 17                                             | 4.04 | Is the taxon adaptable in terms of climatic and other environmental conditions, thus enhancing its potential persistence if it has invaded or could invade the RA area? | Yes                                                 | G. artvinicus is naturally distributed in the SC and the climatic conditions of the region are acceptable to it.                                         | Medium    |
| 18                                             | 4.05 | Is the taxon likely to disrupt food-web structure/function in aquatic ecosystems if it has invaded or is likely to invade the RA                                        | No                                                  | Such a case is not expected                                                                                                                              | Medium    |
| 19                                             | 4.06 | Is the taxon likely to exert adverse impacts on ecosystem services in the RA area?                                                                                      | No                                                  | Such a case is not expected                                                                                                                              | Very high |
| 20                                             | 4.07 | Is it likely that the taxon will host, and/or act as a vector for, recognised pests and infectious agents that are endemic in the RA                                    | No                                                  | Such a case is not expected                                                                                                                              | Medium    |
| 21                                             | 4.08 | Is it likely that the taxon will host, and/or act as a vector for, recognised pests and infectious agents that are absent from (novel to) the RA area?                  | No                                                  | Such a case is not expected                                                                                                                              | Medium    |
| 22                                             | 4.09 | Is it likely that the taxon will achieve a body size that will make it more likely to be released from captivity?                                                       | No                                                  | G. artvinicus is small sized (up to 10 cm) fish and does not have commercial value                                                                       | Very high |
| 23                                             | 4.10 | Is the taxon capable of sustaining itself in a range of water velocity conditions (e.g. versatile in habitat use)?                                                      | No                                                  | G artvinicus occurs in streams with swift and warm flowing water, and cobbled and pebbled bottoms                                                        | Medium    |

|                                 |      |                                                                                                                                                                              |                |                                                                                                                                                                                                                          |           |
|---------------------------------|------|------------------------------------------------------------------------------------------------------------------------------------------------------------------------------|----------------|--------------------------------------------------------------------------------------------------------------------------------------------------------------------------------------------------------------------------|-----------|
| 24                              | 4.11 | Is it likely that the taxon's mode of existence (e.g. excretion of by-products) or behaviours (e.g. feeding) will reduce habitat quality for native taxa?                    | Yes            | This can happen if the population of this species increases                                                                                                                                                              | Low       |
| 25                              | 4.12 | Is the taxon likely to maintain a viable population even when present in low densities (or persisting in adverse conditions by way of a dormant form)?                       | Not applicable | Data deficient                                                                                                                                                                                                           | Low       |
| <b>5. Resource exploitation</b> |      |                                                                                                                                                                              |                |                                                                                                                                                                                                                          |           |
| 26                              | 5.01 | Is the taxon likely to consume threatened or protected native taxa in the RA area?                                                                                           | No             | No such fact has been detected                                                                                                                                                                                           | Low       |
| 27                              | 5.02 | Is the taxon likely to sequester food resources (including nutrients) to the detriment of native taxa in the RA area?                                                        | Yes            | There is a possibility of that                                                                                                                                                                                           | Medium    |
| <b>6. Reproduction</b>          |      |                                                                                                                                                                              |                |                                                                                                                                                                                                                          |           |
| 28                              | 6.01 | Is the taxon likely to exhibit parental care and/or to reduce age-at-maturity in response to environmental conditions?                                                       | Not applicable | Data deficient                                                                                                                                                                                                           | Low       |
| 29                              | 6.02 | Is the taxon likely to produce viable gametes or propagules (in the RA area)?                                                                                                | Yes            | This species is naturally reproduces in the SC region                                                                                                                                                                    | Very high |
| 30                              | 6.03 | Is the taxon likely to hybridise naturally with native taxa?                                                                                                                 | Yes            | There is a possibility of that. There are closed relative species distributed in the Caucasus Region such as <i>G. caucasicus</i> and <i>Romanogobio macropterus</i> which may hybridized with <i>G.</i>                 | Medium    |
| 31                              | 6.04 | Is the taxon likely to be hermaphroditic or to display asexual reproduction?                                                                                                 | No             | No such fact has been described                                                                                                                                                                                          | Medium    |
| 32                              | 6.05 | Is the taxon dependent on the presence of another taxon (or specific habitat features) to complete its life cycle?                                                           | No             | No such fact has been described                                                                                                                                                                                          | Medium    |
| 33                              | 6.06 | Is the taxon known (or likely) to produce a large number of propagules or offspring within a short time span (e.g. < 1 year)?                                                | No             | Data deficient                                                                                                                                                                                                           | Low       |
| 34                              | 6.07 | How many time units (days, months, years) does the taxon require to reach the age-at-first-reproduction?                                                                     | 1              | Data deficient                                                                                                                                                                                                           | Medium    |
| <b>7. Dispersal mechanisms</b>  |      |                                                                                                                                                                              |                |                                                                                                                                                                                                                          |           |
| 35                              | 7.01 | How many potential internal vectors/pathways could the taxon use to disperse within the RA area (with suitable)                                                              | >1             | This species is distributed in the region naturally and also accidentally spread by humans through translocations                                                                                                        | Medium    |
| 36                              | 7.02 | Will any of these vectors/pathways bring the taxon in close proximity to one or more protected areas (e.g. MCZ, MPA, SSSI)?                                                  | Yes            | There is a probability of that                                                                                                                                                                                           | High      |
| 37                              | 7.03 | Does the taxon have a means of actively attaching itself to hard substrata (e.g. ship hulls, pilings, buoys) such that it enhances the likelihood of dispersal?              | No             | Own judgement                                                                                                                                                                                                            | High      |
| 38                              | 7.04 | Is natural dispersal of the taxon likely to occur as eggs (for animals) or as propagules (for plants: seeds, spores) in the RA area?                                         | Yes            | This species is naturally reproduces and spreading in the region                                                                                                                                                         | High      |
| 39                              | 7.05 | Is natural dispersal of the taxon likely to occur as larvae/juveniles (for animals) or as fragments/seedlings (for plants) in the RA area?                                   | Yes            | This species is naturally reproduces and spreading in the region                                                                                                                                                         | High      |
| 40                              | 7.06 | Are older life stages of the taxon likely to migrate in the RA area for reproduction?                                                                                        | Yes            | This species is naturally reproduces and spreading in the region                                                                                                                                                         | High      |
| 41                              | 7.07 | Are propagules or eggs of the taxon likely to be dispersed in the RA area by other animals?                                                                                  | Yes            | Own judgement                                                                                                                                                                                                            | High      |
| 42                              | 7.08 | Is dispersal of the taxon along any of the vectors/pathways mentioned in the previous seven questions (35–41; i.e. both unintentional or intentional) likely to be           | Not applicable | Data deficient                                                                                                                                                                                                           | Low       |
| 43                              | 7.09 | Is dispersal of the taxon density dependent?                                                                                                                                 | Yes            | Own judgement                                                                                                                                                                                                            | Low       |
| <b>8. Tolerance attributes</b>  |      |                                                                                                                                                                              |                |                                                                                                                                                                                                                          |           |
| 44                              | 8.01 | Is the taxon able to withstand being out of water for extended periods (e.g. minimum of one or more hours) at some stage of its life cycle?                                  | No             | No such fact has been detected                                                                                                                                                                                           | Very high |
| 45                              | 8.02 | Is the taxon tolerant of a wide range of water quality conditions relevant to that taxon? [In the Justification field, indicate the relevant water quality variable(s) being | No             | Own judgement                                                                                                                                                                                                            | Medium    |
| 46                              | 8.03 | Can the taxon be controlled or eradicated in the wild with chemical, biological, or other agents/means?                                                                      | Yes            | Own judgement                                                                                                                                                                                                            | Medium    |
| 47                              | 8.04 | Is the taxon likely to tolerate or benefit from environmental/human disturbance?                                                                                             | Yes            | Own judgement                                                                                                                                                                                                            | Medium    |
| 48                              | 8.05 | Is the taxon able to tolerate salinity levels that are higher or lower than those found in its usual environment?                                                            | No             | This fish is typical freshwater species and does not occurring in the brackish or salinity water                                                                                                                         | High      |
| 49                              | 8.06 | Are there effective natural enemies (predators) of the taxon present in the RA area?                                                                                         | Yes            | There are many predator species which can controll the populations of <i>G. artvinicus</i> : e.g. <i>Esox lucius</i> , <i>Squalius</i> spp, <i>Salmo</i> spp, <i>Sander lucioperca</i> , <i>Perca fluviatilis</i> , etc. | Very high |
| <b>C. Climate change</b>        |      |                                                                                                                                                                              |                |                                                                                                                                                                                                                          |           |
| <b>9. Climate change</b>        |      |                                                                                                                                                                              |                |                                                                                                                                                                                                                          |           |

|    |      |                                                                                                                                                              |           |               |        |
|----|------|--------------------------------------------------------------------------------------------------------------------------------------------------------------|-----------|---------------|--------|
| 50 | 9.01 | Under the predicted future climatic conditions, are the risks of entry into the RA area posed by the taxon likely to increase, decrease or not change?       | No change | Own judgement | Medium |
| 51 | 9.02 | Under the predicted future climatic conditions, are the risks of establishment posed by the taxon likely to increase, decrease or not change?                | Increase  | Own judgement | Medium |
| 52 | 9.03 | Under the predicted future climatic conditions, are the risks of dispersal within the RA area posed by the taxon likely to increase, decrease or not change? | Increase  | Own judgement | Medium |
| 53 | 9.04 | Under the predicted future climatic conditions, what is the likely magnitude of future potential impacts on biodiversity and/or ecological integrity/status? | No change | Own judgement | Medium |
| 54 | 9.05 | Under the predicted future climatic conditions, what is the likely magnitude of future potential impacts on ecosystem structure and/or function?             | Lower     | Own judgement | Medium |
| 55 | 9.06 | Under the predicted future climatic conditions, what is the likely magnitude of future potential impacts on ecosystem services/socio-economic factors?       | Lower     | Own judgement | High   |

| Statistics                                     |             |
|------------------------------------------------|-------------|
| Scores                                         |             |
| <b>BRA</b>                                     | <b>14.0</b> |
| <b>BRA Outcome</b>                             | <b>-</b>    |
| <b>BRA+CCA</b>                                 | <b>14.0</b> |
| <b>BRA+CCA Outcome</b>                         | <b>-</b>    |
| Score partition                                |             |
| <b>A. Biogeography/Historical</b>              | <b>2.0</b>  |
| 1. Domestication/Cultivation                   | -2.0        |
| 2. Climate, distribution and introduction risk | 2.0         |
| 3. Invasive elsewhere                          | 2.0         |
| <b>B. Biology/Ecology</b>                      | <b>12.0</b> |
| 4. Undesirable (or persistence) traits         | 3.0         |
| 5. Resource exploitation                       | 2.0         |
| 6. Reproduction                                | 3.0         |
| 7. Dispersal mechanisms                        | 6.0         |
| 8. Tolerance attributes                        | -2.0        |
| <b>C. Climate change</b>                       | <b>0.0</b>  |
| 9. Climate change                              | 0.0         |
| Answered Questions                             |             |
| <b>Total</b>                                   | <b>55</b>   |
| <b>A. Biogeography/Historical</b>              | <b>13</b>   |
| 1. Domestication/Cultivation                   | 3           |
| 2. Climate, distribution and introduction risk | 5           |
| 3. Invasive elsewhere                          | 5           |
| <b>B. Biology/Ecology</b>                      | <b>36</b>   |
| 4. Undesirable (or persistence) traits         | 12          |
| 5. Resource exploitation                       | 2           |
| 6. Reproduction                                | 7           |
| 7. Dispersal mechanisms                        | 9           |
| 8. Tolerance attributes                        | 6           |
| <b>C. Climate change</b>                       | <b>6</b>    |
| 9. Climate change                              | 6           |
| Sectors affected                               |             |
| <b>Commercial</b>                              | <b>0</b>    |
| <b>Environmental</b>                           | <b>0</b>    |
| <b>Species or population nuisance traits</b>   | <b>18</b>   |

| Thresholds     |             |
|----------------|-------------|
| <b>BRA</b>     | <b>-</b>    |
| <b>BRA+CCA</b> | <b>-</b>    |
| Confidence     |             |
| <b>BRA+CCA</b> | <b>0.62</b> |
| <b>BRA</b>     | <b>0.63</b> |
| <b>CCA</b>     | <b>0.54</b> |

| Date and Time       |
|---------------------|
| 05/05/2022 18:16:52 |

## AS-ISK v2

| Taxon and Assessor details         |                                                                                                      |
|------------------------------------|------------------------------------------------------------------------------------------------------|
| Category                           | Fishes and Lampreys (freshwater)                                                                     |
| Taxon name                         | <i>Gobio artvinicus</i>                                                                              |
| Common name                        | Artvin gudgeon                                                                                       |
| Assessor                           | Tatia Kuljanishvili                                                                                  |
| Risk screening context             |                                                                                                      |
| Reason and socio-economic benefits | Kuljanishvili et al. 2020 described that <i>G. artvinicus</i> in the Kura-Aras River basin is alien. |
| Risk assessment area               | South Caucasus                                                                                       |
| Taxonomy                           | Actinopteri (ray-finned fishes) > Cypriniformes (Carps) > Gobionidae (Gudgeons)                      |
| Native range                       | Black Sea basin, the lower Choruh River                                                              |
| Introduced range                   | Kura-Aras River system                                                                               |
| URL                                | <a href="https://fishbase.mhn.fr/summary/68289">https://fishbase.mhn.fr/summary/68289</a>            |

|                                                |      |                                                                                                                                                                         | Response       | Justification (references and/or other information)                                                                                                                                                   | Confidence |
|------------------------------------------------|------|-------------------------------------------------------------------------------------------------------------------------------------------------------------------------|----------------|-------------------------------------------------------------------------------------------------------------------------------------------------------------------------------------------------------|------------|
| A. Biogeography/Historical                     |      |                                                                                                                                                                         |                |                                                                                                                                                                                                       |            |
| 1. Domestication/Cultivation                   |      |                                                                                                                                                                         |                |                                                                                                                                                                                                       |            |
| 1                                              | 1.01 | Has the taxon been the subject of domestication (or cultivation) for at least 20 generations?                                                                           | No             | This is a newly described species and it has not been subject of domestication.                                                                                                                       | Very high  |
| 2                                              | 1.02 | Is the taxon harvested in the wild and likely to be sold or used in its live form?                                                                                      | No             | This taxon is not harvested from the wild. However it can be a contaminant of other trade important fish parcels, this is possibly the way how it got to the Kura-Aras river system (Kuljanishvili et | Medium     |
| 3                                              | 1.03 | Does the taxon have invasive races, varieties, sub-taxa or congeners?                                                                                                   | Yes            | <i>Gobio gobio</i> is considered as invasive species for instance in Italy, reducing the native <i>Gobio benacensis</i> (Bianco & Ketmaier 2005)                                                      | High       |
| 2. Climate, distribution and introduction risk |      |                                                                                                                                                                         |                |                                                                                                                                                                                                       |            |
| 4                                              | 2.01 | How similar are the climatic conditions of the Risk Assessment (RA) area and the taxon's native range?                                                                  | High           | The climate is somehow similar                                                                                                                                                                        | High       |
| 5                                              | 2.02 | What is the quality of the climate matching data?                                                                                                                       | Low            | There are no climatic stations in climatch to make this analysis. However, according to Koppen-Geiger map the climate is somehow similar.                                                             | High       |
| 6                                              | 2.03 | Is the taxon already present outside of captivity in the RA area?                                                                                                       | Yes            | Yes it has been found in Kura-Aras system in Turkey, east Georgia, Armenia and Azerbaijan (Kaya et al 2020; Kuljanishvili et                                                                          | Very high  |
| 7                                              | 2.04 | How many potential vectors could the taxon use to enter in the RA area?                                                                                                 | One            | Aquaculture                                                                                                                                                                                           | High       |
| 8                                              | 2.05 | Is the taxon currently found in close proximity to, and likely to enter into, the RA area in the near future (e.g. unintentional and intentional introductions)?        | Yes            | Currently, this species is widely distributed in the Kura-Aras system (Kuljanishvili et al 2021)                                                                                                      | Very high  |
| 3. Invasive elsewhere                          |      |                                                                                                                                                                         |                |                                                                                                                                                                                                       |            |
| 9                                              | 3.01 | Has the taxon become naturalised (established viable populations) outside its                                                                                           | Yes            | Yes (Kuljanishvili et al 2021)                                                                                                                                                                        | Very high  |
| 10                                             | 3.02 | In the taxon's introduced range, are there known adverse impacts to wild stocks or commercial taxa?                                                                     | No             | Nothing is known yet, however one might assume there is some impact to wild stocks in terms of competition                                                                                            | Medium     |
| 11                                             | 3.03 | In the taxon's introduced range, are there known adverse impacts to aquaculture?                                                                                        | No             | No. No effective natural enemies present in RA area                                                                                                                                                   | Medium     |
| 12                                             | 3.04 | In the taxon's introduced range, are there known adverse impacts to ecosystem                                                                                           | No             | No known adverse impacts to ecosystem services. Possible can be transmitting parasites or diseases                                                                                                    | Low        |
| 13                                             | 3.05 | In the taxon's introduced range, are there known adverse socio-economic impacts?                                                                                        | No             | No known adverse socio-economic impacts                                                                                                                                                               | Medium     |
| B. Biology/Ecology                             |      |                                                                                                                                                                         |                |                                                                                                                                                                                                       |            |
| 4. Undesirable (or persistence) traits         |      |                                                                                                                                                                         |                |                                                                                                                                                                                                       |            |
| 14                                             | 4.01 | Is it likely that the taxon will be poisonous or pose other risks to human health?                                                                                      | No             | Not poisonous                                                                                                                                                                                         | Very high  |
| 15                                             | 4.02 | Is it likely that the taxon will smother one or more native taxa (that are not threatened or protected)?                                                                | Yes            | They might be in competition for food and resources with the native gobionid fishes.                                                                                                                  | High       |
| 16                                             | 4.03 | Are there any threatened or protected taxa that the non-native taxon would parasitise in the RA area?                                                                   | No             | Does not parasite                                                                                                                                                                                     | Very high  |
| 17                                             | 4.04 | Is the taxon adaptable in terms of climatic and other environmental conditions, thus enhancing its potential persistence if it has invaded or could invade the RA area? | Not applicable | This species is newly discovered and there is no information about its biology.                                                                                                                       | Low        |
| 18                                             | 4.05 | Is the taxon likely to disrupt food-web structure/function in aquatic ecosystems if it has invaded or is likely to invade the RA                                        | No             | Most likely it will not disrupt food-web structure                                                                                                                                                    | Medium     |
| 19                                             | 4.06 | Is the taxon likely to exert adverse impacts on ecosystem services in the RA area?                                                                                      | No             | Not likely                                                                                                                                                                                            | High       |
| 20                                             | 4.07 | Is it likely that the taxon will host, and/or act as a vector for, recognised pests and infectious agents that are endemic in the RA                                    | Not applicable | No information available                                                                                                                                                                              | Medium     |
| 21                                             | 4.08 | Is it likely that the taxon will host, and/or act as a vector for, recognised pests and infectious agents that are absent from (novel to) the RA area?                  | Yes            | It is likely                                                                                                                                                                                          | Medium     |
| 22                                             | 4.09 | Is it likely that the taxon will achieve a body size that will make it more likely to be released from captivity?                                                       | No             | It is a small sized fish 10 cm max SL                                                                                                                                                                 | High       |
| 23                                             | 4.10 | Is the taxon capable of sustaining itself in a range of water velocity conditions (e.g. versatile in habitat use)?                                                      | Yes            | It inhabits in fast flowing rivers. Species of its genera are known to be adapting in different habitats (Turan et al 2016)                                                                           | High       |

|                                 |      |                                                                                                                                                                              |                |                                                                                                                                                                                                                                                      |           |
|---------------------------------|------|------------------------------------------------------------------------------------------------------------------------------------------------------------------------------|----------------|------------------------------------------------------------------------------------------------------------------------------------------------------------------------------------------------------------------------------------------------------|-----------|
| 24                              | 4.11 | Is it likely that the taxon's mode of existence (e.g. excretion of by-products) or behaviours (e.g. feeding) will reduce habitat quality for native taxa?                    | No             | It is not documented. However it is less likely                                                                                                                                                                                                      | Medium    |
| 25                              | 4.12 | Is the taxon likely to maintain a viable population even when present in low densities (or persisting in adverse conditions by way of a dormant form)?                       | Yes            | There is no documented evidence that they can maintain a viable populations when present in low densities but the fact that they are so widespread in Kura Aras system, indicates that they can.                                                     | Medium    |
| <b>5. Resource exploitation</b> |      |                                                                                                                                                                              |                |                                                                                                                                                                                                                                                      |           |
| 26                              | 5.01 | Is the taxon likely to consume threatened or protected native taxa in the RA area?                                                                                           | No             | No information available                                                                                                                                                                                                                             | Medium    |
| 27                              | 5.02 | Is the taxon likely to sequester food resources (including nutrients) to the detriment of native taxa in the RA area?                                                        | No             | it is less likely                                                                                                                                                                                                                                    | Low       |
| <b>6. Reproduction</b>          |      |                                                                                                                                                                              |                |                                                                                                                                                                                                                                                      |           |
| 28                              | 6.01 | Is the taxon likely to exhibit parental care and/or to reduce age-at-maturity in response to environmental conditions?                                                       | No             | No. information available                                                                                                                                                                                                                            | High      |
| 29                              | 6.02 | Is the taxon likely to produce viable gametes or propagules (in the RA area)?                                                                                                | Yes            | Yes. The climate is quite similar                                                                                                                                                                                                                    | High      |
| 30                              | 6.03 | Is the taxon likely to hybridise naturally with native taxa?                                                                                                                 | Yes            | It is likely                                                                                                                                                                                                                                         | High      |
| 31                              | 6.04 | Is the taxon likely to be hermaphroditic or to display asexual reproduction?                                                                                                 | No             | No. Does not display asexual reproduction                                                                                                                                                                                                            | High      |
| 32                              | 6.05 | Is the taxon dependent on the presence of another taxon (or specific habitat features) to complete its life cycle?                                                           | No             | No. See: <a href="https://www.fishbase.de/summary/Gobio-artvinicus.html">https://www.fishbase.de/summary/Gobio-artvinicus.html</a>                                                                                                                   | Very high |
| 33                              | 6.06 | Is the taxon known (or likely) to produce a large number of propagules or offspring within a short time span (e.g. < 1 year)?                                                | Yes            | The species reproduction biology is not known, however as its relatives spawn several times a year it can be possible                                                                                                                                | Low       |
| 34                              | 6.07 | How many time units (days, months, years) does the taxon require to reach the age-at-first-reproduction?                                                                     | 1              | possibly 1                                                                                                                                                                                                                                           | Low       |
| <b>7. Dispersal mechanisms</b>  |      |                                                                                                                                                                              |                |                                                                                                                                                                                                                                                      |           |
| 35                              | 7.01 | How many potential internal vectors/pathways could the taxon use to disperse within the RA area (with suitable)                                                              | One            | Aquaculture                                                                                                                                                                                                                                          | High      |
| 36                              | 7.02 | Will any of these vectors/pathways bring the taxon in close proximity to one or more protected areas (e.g. MCZ, MPA, SSSI)?                                                  | No             | Not this vectors. But it might disperse in the protected areas from neighbouring areas                                                                                                                                                               | Medium    |
| 37                              | 7.03 | Does the taxon have a means of actively attaching itself to hard substrata (e.g. ship hulls, pilings, buoys) such that it enhances the likelihood of dispersal?              | No             | No. Morphologically this species does not have a means of actively attaching itself to hard substrata                                                                                                                                                | Very high |
| 38                              | 7.04 | Is natural dispersal of the taxon likely to occur as eggs (for animals) or as propagules (for plants: seeds, spores) in the RA area?                                         | No             | No. can not be distributed as eggs.                                                                                                                                                                                                                  | High      |
| 39                              | 7.05 | Is natural dispersal of the taxon likely to occur as larvae/juveniles (for animals) or as fragments/seedlings (for plants) in the RA area?                                   | Yes            | Yes. it is possible.                                                                                                                                                                                                                                 | High      |
| 40                              | 7.06 | Are older life stages of the taxon likely to migrate in the RA area for reproduction?                                                                                        | No             | Does not migrate                                                                                                                                                                                                                                     | High      |
| 41                              | 7.07 | Are propagules or eggs of the taxon likely to be dispersed in the RA area by other animals?                                                                                  | No             | No. Can not be dispersed by other animals                                                                                                                                                                                                            | High      |
| 42                              | 7.08 | Is dispersal of the taxon along any of the vectors/pathways mentioned in the previous seven questions (35-41; i.e. both unintentional or intentional) likely to be           | No             | NO information available                                                                                                                                                                                                                             | Low       |
| 43                              | 7.09 | Is dispersal of the taxon density dependent?                                                                                                                                 | No             | Not documented                                                                                                                                                                                                                                       | Low       |
| <b>8. Tolerance attributes</b>  |      |                                                                                                                                                                              |                |                                                                                                                                                                                                                                                      |           |
| 44                              | 8.01 | Is the taxon able to withstand being out of water for extended periods (e.g. minimum of one or more hours) at some stage of its life cycle?                                  | No             | No information available                                                                                                                                                                                                                             | High      |
| 45                              | 8.02 | Is the taxon tolerant of a wide range of water quality conditions relevant to that taxon? [In the Justification field, indicate the relevant water quality variable(s) being | No             | It is not documented, however we know that this species is a rheophilic which means that it prefers fast flowing and clean water.                                                                                                                    | Medium    |
| 46                              | 8.03 | Can the taxon be controlled or eradicated in the wild with chemical, biological, or other agents/means?                                                                      | No             | It is very widespread and it will be impossible                                                                                                                                                                                                      | High      |
| 47                              | 8.04 | Is the taxon likely to tolerate or benefit from environmental/human disturbance?                                                                                             | No             | less likely                                                                                                                                                                                                                                          | Medium    |
| 48                              | 8.05 | Is the taxon able to tolerate salinity levels that are higher or lower than those found in its usual environment?                                                            | Not applicable | No information available                                                                                                                                                                                                                             | Medium    |
| 49                              | 8.06 | Are there effective natural enemies (predators) of the taxon present in the RA                                                                                               | No             | No. No effective natural enemies present in RA area                                                                                                                                                                                                  | Medium    |
| <b>C. Climate change</b>        |      |                                                                                                                                                                              |                |                                                                                                                                                                                                                                                      |           |
| <b>9. Climate change</b>        |      |                                                                                                                                                                              |                |                                                                                                                                                                                                                                                      |           |
| 50                              | 9.01 | Under the predicted future climatic conditions, are the risks of entry into the RA area posed by the taxon likely to increase, decrease or not change?                       | Increase       | It was hypothesised that climate change might alert the mechanisms of transportation and introduction of non-native species. Commercial and recreational activities will increase, that itself increases the propagule pressure levels of non-native | High      |

|    |      |                                                                                                                                                              |           |                                                                                                                                                           |        |
|----|------|--------------------------------------------------------------------------------------------------------------------------------------------------------------|-----------|-----------------------------------------------------------------------------------------------------------------------------------------------------------|--------|
| 51 | 9.02 | Under the predicted future climatic conditions, are the risks of establishment posed by the taxon likely to increase, decrease or not change?                | Increase  | It was discovered in warm flowing waters which makes us think that this species might benefit from the climate change                                     | Medium |
| 52 | 9.03 | Under the predicted future climatic conditions, are the risks of dispersal within the RA area posed by the taxon likely to increase, decrease or not change? | Increase  | If their populations will favour from warming temperatures their dispersal might increase                                                                 | Medium |
| 53 | 9.04 | Under the predicted future climatic conditions, what is the likely magnitude of future potential impacts on biodiversity and/or ecological integrity/status? | Higher    | competition with other rheophilic species will increase since their populations will increase.                                                            | Medium |
| 54 | 9.05 | Under the predicted future climatic conditions, what is the likely magnitude of future potential impacts on ecosystem structure and/or function?             | No change | I assume there won't be much change                                                                                                                       | Medium |
| 55 | 9.06 | Under the predicted future climatic conditions, what is the likely magnitude of future potential impacts on ecosystem services/socio-economic factors?       | Higher    | Impact on ecosystem services and impact on socio-economic factors can be increased. If this species will contribute to the decline of native fish species | Medium |

| Statistics                                     |             |
|------------------------------------------------|-------------|
| Scores                                         |             |
| <b>BRA</b>                                     | <b>5.0</b>  |
| <b>BRA Outcome</b>                             | <b>-</b>    |
| <b>BRA+CCA</b>                                 | <b>15.0</b> |
| <b>BRA+CCA Outcome</b>                         | <b>-</b>    |
| Score partition                                |             |
| <b>A. Biogeography/Historical</b>              | <b>3.0</b>  |
| 1. Domestication/Cultivation                   | 0.0         |
| 2. Climate, distribution and introduction risk | 1.0         |
| 3. Invasive elsewhere                          | 2.0         |
| <b>B. Biology/Ecology</b>                      | <b>2.0</b>  |
| 4. Undesirable (or persistence) traits         | 3.0         |
| 5. Resource exploitation                       | 0.0         |
| 6. Reproduction                                | 4.0         |
| 7. Dispersal mechanisms                        | -3.0        |
| 8. Tolerance attributes                        | -2.0        |
| <b>C. Climate change</b>                       | <b>10.0</b> |
| 9. Climate change                              | 10.0        |
| Answered Questions                             |             |
| <b>Total</b>                                   | <b>55</b>   |
| <b>A. Biogeography/Historical</b>              | <b>13</b>   |
| 1. Domestication/Cultivation                   | 3           |
| 2. Climate, distribution and introduction risk | 5           |
| 3. Invasive elsewhere                          | 5           |
| <b>B. Biology/Ecology</b>                      | <b>36</b>   |
| 4. Undesirable (or persistence) traits         | 12          |
| 5. Resource exploitation                       | 2           |
| 6. Reproduction                                | 7           |
| 7. Dispersal mechanisms                        | 9           |
| 8. Tolerance attributes                        | 6           |
| <b>C. Climate change</b>                       | <b>6</b>    |
| 9. Climate change                              | 6           |
| Sectors affected                               |             |
| <b>Commercial</b>                              | <b>2</b>    |
| <b>Environmental</b>                           | <b>2</b>    |
| <b>Species or population nuisance traits</b>   | <b>12</b>   |

| Thresholds     |             |
|----------------|-------------|
| <b>BRA</b>     | <b>-</b>    |
| <b>BRA+CCA</b> | <b>-</b>    |
| Confidence     |             |
| <b>BRA+CCA</b> | <b>0.63</b> |
| <b>BRA</b>     | <b>0.64</b> |
| <b>CCA</b>     | <b>0.54</b> |

| Date and Time       |  |
|---------------------|--|
| 21/05/2022 14:09:46 |  |

## AS-ISK v2

| Taxon and Assessor details         |                                                                                                                                   |
|------------------------------------|-----------------------------------------------------------------------------------------------------------------------------------|
| Category                           | Fishes and Lampreys (freshwater)                                                                                                  |
| Taxon name                         | <i>Gymnocephalus cernua</i>                                                                                                       |
| Common name                        | ruffe                                                                                                                             |
| Assessor                           | Bella Japoshvili                                                                                                                  |
| Risk screening context             |                                                                                                                                   |
| Reason and socio-economic benefits | This species is known to cause a significant changes in the introduced areas. In the RA area it was                               |
| Risk assessment area               | South Caucasus                                                                                                                    |
| Taxonomy                           | Actinopteri (ray-finned fishes) > Perciformes/Percoidae (Perchs) > Percidae (Perches)                                             |
| Native range                       | Caspian Sea, Black Sea, Baltic Sea basins but not in the South Caucasus                                                           |
| Introduced range                   | Widely in Europe and USA                                                                                                          |
| URL                                | <a href="https://www.fishbase.de/summary/Gymnocephalus-cernua.html">https://www.fishbase.de/summary/Gymnocephalus-cernua.html</a> |

|                                                |      |                                                                                                                                                                         | Response | Justification (references and/or other information)                                                                                                                                                                                                                                                                                                                                                                                                                          | Confidence |
|------------------------------------------------|------|-------------------------------------------------------------------------------------------------------------------------------------------------------------------------|----------|------------------------------------------------------------------------------------------------------------------------------------------------------------------------------------------------------------------------------------------------------------------------------------------------------------------------------------------------------------------------------------------------------------------------------------------------------------------------------|------------|
| A. Biogeography/Historical                     |      |                                                                                                                                                                         |          |                                                                                                                                                                                                                                                                                                                                                                                                                                                                              |            |
| 1. Domestication/Cultivation                   |      |                                                                                                                                                                         |          |                                                                                                                                                                                                                                                                                                                                                                                                                                                                              |            |
| 1                                              | 1.01 | Has the taxon been the subject of domestication (or cultivation) for at least 20 generations?                                                                           | No       | Not an ornamental species and not an economic importance                                                                                                                                                                                                                                                                                                                                                                                                                     | Very high  |
| 2                                              | 1.02 | Is the taxon harvested in the wild and likely to be sold or used in its live form?                                                                                      | Yes      | Maitland, P.S. and R.N. Campbell, 1992. Freshwater fishes of the British Isles. HarperCollins Publishers, London.368 p. ; Gutsch, M., Hoffman, J. A review of Ruffe ( <i>Gymnocephalus cernua</i> ) life history in its native versus non-native range. Rev Fish Biol Fisheries 26, 213–233 (2016). <a href="https://doi.org/10.1007/s11160-016-9422-5">https://doi.org/10.1007/s11160-016-9422-5</a>                                                                        | High       |
| 3                                              | 1.03 | Does the taxon have invasive races, varieties, sub-taxa or congeners?                                                                                                   | No       | No other congener or races are known as invasive                                                                                                                                                                                                                                                                                                                                                                                                                             | High       |
| 2. Climate, distribution and introduction risk |      |                                                                                                                                                                         |          |                                                                                                                                                                                                                                                                                                                                                                                                                                                                              |            |
| 4                                              | 2.01 | How similar are the climatic conditions of the Risk Assessment (RA) area and the taxon's native range?                                                                  | High     | Result of climatch algorithm                                                                                                                                                                                                                                                                                                                                                                                                                                                 | Medium     |
| 5                                              | 2.02 | What is the quality of the climate matching data?                                                                                                                       | Low      | Due to low accuracy of local climate data                                                                                                                                                                                                                                                                                                                                                                                                                                    | High       |
| 6                                              | 2.03 | Is the taxon already present outside of captivity in the RA area?                                                                                                       | Yes      | Epitashvili, G., Geiger, M.F., Astrin, J.J., Herder, F., Japoshvili, B., Mumladze, L., 2020. Towards retrieving the Promethean treasure: a first molecular assessment of the freshwater fish diversity of Georgia. Biodivers. Data J. e57862.                                                                                                                                                                                                                                | Very high  |
| 7                                              | 2.04 | How many potential vectors could the taxon use to enter in the RA area?                                                                                                 | One      | Human mediated dispersal                                                                                                                                                                                                                                                                                                                                                                                                                                                     | High       |
| 8                                              | 2.05 | Is the taxon currently found in close proximity to, and likely to enter into, the RA area in the near future (e.g. unintentional and intentional introductions)?        | Yes      | Epitashvili, G., Geiger, M.F., Astrin, J.J., Herder, F., Japoshvili, B., Mumladze, L., 2020. Towards retrieving the Promethean treasure: a first molecular assessment of the freshwater fish diversity of Georgia. Biodivers. Data J. e57862.                                                                                                                                                                                                                                | Very high  |
| 3. Invasive elsewhere                          |      |                                                                                                                                                                         |          |                                                                                                                                                                                                                                                                                                                                                                                                                                                                              |            |
| 9                                              | 3.01 | Has the taxon become naturalised (established viable populations) outside its native range?                                                                             | Yes      | Gutsch, M., Hoffman, J. A review of Ruffe ( <i>Gymnocephalus cernua</i> ) life history in its native versus non-native range. Rev Fish Biol Fisheries 26, 213–233 (2016).                                                                                                                                                                                                                                                                                                    | Very high  |
| 10                                             | 3.02 | In the taxon's introduced range, are there known adverse impacts to wild stocks or commercial taxa?                                                                     | Yes      | Rosch R. & Schmid W. 1996: Ruffe ( <i>Gymnocephalus cernuus</i> L.,) newly introduced into Lake Costance: preliminary data on population biology and possible effects on whitefish ( <i>Coregonus lavaretus</i> L.). Ann. Zool. Fennici 33: 467–471.; Lorenzoni, M., Pace, R., Pedicillo, G., Viali, P., & Carosi, A. (2009). Growth, catches and reproductive biology of ruffe <i>Gymnocephalus cernuus</i> in Lake Piediluco (Umbria, Italy). Folia Zoologica. 58(4). 420. | Medium     |
| 11                                             | 3.03 | In the taxon's introduced range, are there known adverse impacts to aquaculture?                                                                                        | Yes      | Rosch R. & Schmid W. 1996: Ruffe ( <i>Gymnocephalus cernuus</i> L.,) newly introduced into Lake Costance: preliminary data on population biology and possible effects on whitefish ( <i>Coregonus lavaretus</i> L.). Ann. Zool. Fennici 33: 467–471.                                                                                                                                                                                                                         | Medium     |
| 12                                             | 3.04 | In the taxon's introduced range, are there known adverse impacts to ecosystem                                                                                           | Yes      | Not well documented evidence. Professional guess (affecting the economically important fish populations)                                                                                                                                                                                                                                                                                                                                                                     | Low        |
| 13                                             | 3.05 | In the taxon's introduced range, are there known adverse socio-economic impacts?                                                                                        | Yes      | Not well documented evidences                                                                                                                                                                                                                                                                                                                                                                                                                                                | Low        |
| B. Biology/Ecology                             |      |                                                                                                                                                                         |          |                                                                                                                                                                                                                                                                                                                                                                                                                                                                              |            |
| 4. Undesirable (or persistence) traits         |      |                                                                                                                                                                         |          |                                                                                                                                                                                                                                                                                                                                                                                                                                                                              |            |
| 14                                             | 4.01 | Is it likely that the taxon will be poisonous or pose other risks to human health?                                                                                      | No       | Not a harmful species                                                                                                                                                                                                                                                                                                                                                                                                                                                        | High       |
| 15                                             | 4.02 | Is it likely that the taxon will smother one or more native taxa (that are not threatened or protected)?                                                                | Yes      | It competes to at least a native <i>Perca fluviatilis</i> . Leigh, P. (1998). Benefits and costs of the ruffe control program for the Great Lakes fishery. Journal of Great Lakes Research, 24(2), 351-360.                                                                                                                                                                                                                                                                  | High       |
| 16                                             | 4.03 | Are there any threatened or protected taxa that the non-native taxon would parasitise in the RA area?                                                                   | Yes      | Wide variety of food includes juvenile fishes, eggs and invertebrates (CABI, 2022. <i>Gymnocephalus cernuus</i> . In: Invasive Species Compendium. Wallingford, UK: CAB International.                                                                                                                                                                                                                                                                                       | High       |
| 17                                             | 4.04 | Is the taxon adaptable in terms of climatic and other environmental conditions, thus enhancing its potential persistence if it has invaded or could invade the RA area? | Yes      | Gutsch, M., Hoffman, J. A review of Ruffe ( <i>Gymnocephalus cernua</i> ) life history in its native versus non-native range. Rev Fish Biol Fisheries 26, 213–233 (2016). <a href="https://doi.org/10.1007/s11160-016-9422-5">https://doi.org/10.1007/s11160-016-9422-5</a>                                                                                                                                                                                                  | Very high  |
| 18                                             | 4.05 | Is the taxon likely to disrupt food-web structure/function in aquatic ecosystems if it has invaded or is likely to invade the RA                                        | No       | No documented evidence                                                                                                                                                                                                                                                                                                                                                                                                                                                       | Low        |
| 19                                             | 4.06 | Is the taxon likely to exert adverse impacts on ecosystem services in the RA area?                                                                                      | Yes      | By coming/predation to economically valued species                                                                                                                                                                                                                                                                                                                                                                                                                           | Medium     |
| 20                                             | 4.07 | Is it likely that the taxon will host, and/or act as a vector for, recognised pests and infectious agents that are endemic in the RA                                    | No       | Not a documented evidence exists                                                                                                                                                                                                                                                                                                                                                                                                                                             | Low        |

|                                 |      |                                                                                                                                                                              |     |                                                                                                                                                                                                                                                                                                                       |           |
|---------------------------------|------|------------------------------------------------------------------------------------------------------------------------------------------------------------------------------|-----|-----------------------------------------------------------------------------------------------------------------------------------------------------------------------------------------------------------------------------------------------------------------------------------------------------------------------|-----------|
| 21                              | 4.08 | Is it likely that the taxon will host, and/or act as a vector for, recognised pests and infectious agents that are absent from (novel to) the RA area?                       | Yes | No documented evidence exists                                                                                                                                                                                                                                                                                         | Low       |
| 22                              | 4.09 | Is it likely that the taxon will achieve a body size that will make it more likely to be released from captivity?                                                            | No  | Generally small bodied species                                                                                                                                                                                                                                                                                        | Very high |
| 23                              | 4.10 | Is the taxon capable of sustaining itself in a range of water velocity conditions (e.g. versatile in habitat use)?                                                           | Yes | Gutsch, M., Hoffman, J. A review of Ruffe ( <i>Gymnocephalus cernua</i> ) life history in its native versus non-native range. <i>Rev Fish Biol Fisheries</i> 26, 213–233 (2016).                                                                                                                                      | Medium    |
| 24                              | 4.11 | Is it likely that the taxon's mode of existence (e.g. excretion of by-products) or behaviours (e.g. feeding) will reduce habitat quality for native taxa?                    | Yes | Gutsch, M., Hoffman, J. A review of Ruffe ( <i>Gymnocephalus cernua</i> ) life history in its native versus non-native range. <i>Rev Fish Biol Fisheries</i> 26, 213–233 (2016).<br><a href="https://doi.org/10.1007/s11160-016-9422-5">https://doi.org/10.1007/s11160-016-9422-5</a>                                 | Medium    |
| 25                              | 4.12 | Is the taxon likely to maintain a viable population even when present in low densities (or persisting in adverse conditions by way of a dormant form)?                       | No  | No documented evidence exists                                                                                                                                                                                                                                                                                         | Low       |
| <b>5. Resource exploitation</b> |      |                                                                                                                                                                              |     |                                                                                                                                                                                                                                                                                                                       |           |
| 26                              | 5.01 | Is the taxon likely to consume threatened or protected native taxa in the RA area?                                                                                           | Yes | It is a predator (Bergman, E. (1988). Foraging abilities and niche breadths of two percids, <i>Perca fluviatilis</i> and <i>Gymnocephalus cernua</i> , under different environmental conditions. <i>The Journal of Animal Ecology</i> , 443-453.)                                                                     | Medium    |
| 27                              | 5.02 | Is the taxon likely to sequester food resources (including nutrients) to the detriment of native taxa in the RA area?                                                        | Yes | Competing with other predators (Bergman, E. (1988). Foraging abilities and niche breadths of two percids, <i>Perca fluviatilis</i> and <i>Gymnocephalus cernua</i> , under different environmental conditions. <i>The Journal of Animal Ecology</i> , 443-453.)                                                       | Medium    |
| <b>6. Reproduction</b>          |      |                                                                                                                                                                              |     |                                                                                                                                                                                                                                                                                                                       |           |
| 28                              | 6.01 | Is the taxon likely to exhibit parental care and/or to reduce age-at-maturity in response to environmental conditions?                                                       | No  | Not ever observed                                                                                                                                                                                                                                                                                                     | High      |
| 29                              | 6.02 | Is the taxon likely to produce viable gametes or propagules (in the RA area)?                                                                                                | Yes | No documented evidence exists though it have been recently caught in wild                                                                                                                                                                                                                                             | Medium    |
| 30                              | 6.03 | Is the taxon likely to hybridise naturally with native taxa?                                                                                                                 | No  | Not known, and not expected                                                                                                                                                                                                                                                                                           | High      |
| 31                              | 6.04 | Is the taxon likely to be hermaphroditic or to display asexual reproduction?                                                                                                 | No  | Known as sexually reproducing species                                                                                                                                                                                                                                                                                 | High      |
| 32                              | 6.05 | Is the taxon dependent on the presence of another taxon (or specific habitat features) to complete its life cycle?                                                           | No  | Species can complete its life cycle independently                                                                                                                                                                                                                                                                     | Very high |
| 33                              | 6.06 | Is the taxon known (or likely) to produce a large number of propagules or offspring within a short time span (e.g. < 1 year)?                                                | Yes | (CABI, 2022. <i>Gymnocephalus cernuus</i> . In: <i>Invasive Species Compendium</i> . Wallingford, UK: CAB International. <a href="http://www.cabi.org/isc">www.cabi.org/isc</a> .)                                                                                                                                    | High      |
| 34                              | 6.07 | How many time units (days, months, years) does the taxon require to reach the age-at-first-reproduction?                                                                     | 2   | Years                                                                                                                                                                                                                                                                                                                 | High      |
| <b>7. Dispersal mechanisms</b>  |      |                                                                                                                                                                              |     |                                                                                                                                                                                                                                                                                                                       |           |
| 35                              | 7.01 | How many potential internal vectors/pathways could the taxon use to disperse within the RA area (with suitable vectors)?                                                     | > 1 | Natural dispersal, Human mediated dispersal                                                                                                                                                                                                                                                                           | High      |
| 36                              | 7.02 | Will any of these vectors/pathways bring the taxon in close proximity to one or more protected areas (e.g. MCZ, MPA, SSSI)?                                                  | Yes | Already detected nearby to Protected areas of Black Sea Coast with RA area                                                                                                                                                                                                                                            | Medium    |
| 37                              | 7.03 | Does the taxon have a means of actively attaching itself to hard substrata (e.g. ship hulls, pilings, buoys) such that it enhances the likelihood of dispersal?              | No  | No such fact is observed                                                                                                                                                                                                                                                                                              | Very high |
| 38                              | 7.04 | Is natural dispersal of the taxon likely to occur as eggs (for animals) or as propagules (for plants: seeds, spores) in the RA area?                                         | No  | Not a documented evidence exists                                                                                                                                                                                                                                                                                      | High      |
| 39                              | 7.05 | Is natural dispersal of the taxon likely to occur as larvae/juveniles (for animals) or as fragments/seedlings (for plants) in the RA area?                                   | Yes | Through water currents with RA area                                                                                                                                                                                                                                                                                   | Medium    |
| 40                              | 7.06 | Are older life stages of the taxon likely to migrate in the RA area for reproduction?                                                                                        | No  | Not a migrant species and not such an evidence have ever been described from other areas                                                                                                                                                                                                                              | Medium    |
| 41                              | 7.07 | Are propagules or eggs of the taxon likely to be dispersed in the RA area by other animals?                                                                                  | No  | Not expected based on professional judgement                                                                                                                                                                                                                                                                          | Medium    |
| 42                              | 7.08 | Is dispersal of the taxon along any of the vectors/pathways mentioned in the previous seven questions (35–41; i.e. both unintentional or intentional) likely to be           | Yes | Due to large number of eggs/juveniles                                                                                                                                                                                                                                                                                 | High      |
| 43                              | 7.09 | Is dispersal of the taxon density dependent?                                                                                                                                 | No  | No information, though not expected                                                                                                                                                                                                                                                                                   | Low       |
| <b>8. Tolerance attributes</b>  |      |                                                                                                                                                                              |     |                                                                                                                                                                                                                                                                                                                       |           |
| 44                              | 8.01 | Is the taxon able to withstand being out of water for extended periods (e.g. minimum of one or more hours) at some stage of its life cycle?                                  | No  | No information though not expected                                                                                                                                                                                                                                                                                    | Low       |
| 45                              | 8.02 | Is the taxon tolerant of a wide range of water quality conditions relevant to that taxon? [In the Justification field, indicate the relevant water quality variable(s) being | Yes | Physical and chemical composition; Gutsch, M., Hoffman, J. A review of Ruffe ( <i>Gymnocephalus cernua</i> ) life history in its native versus non-native range. <i>Rev Fish Biol Fisheries</i> 26, 213–233 (2016). <a href="https://doi.org/10.1007/s11160-016-9422-5">https://doi.org/10.1007/s11160-016-9422-5</a> | Very high |
| 46                              | 8.03 | Can the taxon be controlled or eradicated in the wild with chemical, biological, or other agents/means?                                                                      | No  | No documented evidence exists                                                                                                                                                                                                                                                                                         | Low       |



|                          |      |                                                                                                                                                              |          |                                 |        |
|--------------------------|------|--------------------------------------------------------------------------------------------------------------------------------------------------------------|----------|---------------------------------|--------|
| 47                       | 8.04 | Is the taxon likely to tolerate or benefit from environmental/human disturbance?                                                                             | No       | No documented evidence exists   | Low    |
| 48                       | 8.05 | Is the taxon able to tolerate salinity levels that are higher or lower than those found in its usual environment?                                            | No       | No documented evidence exists.  | High   |
| 49                       | 8.06 | Are there effective natural enemies (predators) of the taxon present in the RA                                                                               | No       | Not known, not expected         | Medium |
| <b>C. Climate change</b> |      |                                                                                                                                                              |          |                                 |        |
| <b>9. Climate change</b> |      |                                                                                                                                                              |          |                                 |        |
| 50                       | 9.01 | Under the predicted future climatic conditions, are the risks of entry into the RA area posed by the taxon likely to increase, decrease or not change?       | Increase | Based on professional judgement | Low    |
| 51                       | 9.02 | Under the predicted future climatic conditions, are the risks of establishment posed by the taxon likely to increase, decrease or not change?                | Increase | Based on professional judgement | Low    |
| 52                       | 9.03 | Under the predicted future climatic conditions, are the risks of dispersal within the RA area posed by the taxon likely to increase, decrease or not change? | Increase | Based on professional judgement | Low    |
| 53                       | 9.04 | Under the predicted future climatic conditions, what is the likely magnitude of future potential impacts on biodiversity and/or ecological integrity/status? | Higher   | Based on professional judgement | Low    |
| 54                       | 9.05 | Under the predicted future climatic conditions, what is the likely magnitude of future potential impacts on ecosystem structure and/or function?             | Higher   | Based on professional judgement | Low    |
| 55                       | 9.06 | Under the predicted future climatic conditions, what is the likely magnitude of future potential impacts on ecosystem services/socio-economic factors?       | Higher   | Based on professional judgement | Low    |

| Statistics                                     |             |
|------------------------------------------------|-------------|
| Scores                                         |             |
| <b>BRA</b>                                     | <b>34.0</b> |
| <b>BRA Outcome</b>                             | <b>-</b>    |
| <b>BRA+CCA</b>                                 | <b>46.0</b> |
| <b>BRA+CCA Outcome</b>                         | <b>-</b>    |
| Score partition                                |             |
| <b>A. Biogeography/Historical</b>              | <b>19.0</b> |
| 1. Domestication/Cultivation                   | 0.0         |
| 2. Climate, distribution and introduction risk | 1.0         |
| 3. Invasive elsewhere                          | 18.0        |
| <b>B. Biology/Ecology</b>                      | <b>15.0</b> |
| 4. Undesirable (or persistence) traits         | 7.0         |
| 5. Resource exploitation                       | 7.0         |
| 6. Reproduction                                | 1.0         |
| 7. Dispersal mechanisms                        | 0.0         |
| 8. Tolerance attributes                        | 0.0         |
| <b>C. Climate change</b>                       | <b>12.0</b> |
| 9. Climate change                              | 12.0        |
| Answered Questions                             |             |
| <b>Total</b>                                   | <b>55</b>   |
| <b>A. Biogeography/Historical</b>              | <b>13</b>   |
| 1. Domestication/Cultivation                   | 3           |
| 2. Climate, distribution and introduction risk | 5           |
| 3. Invasive elsewhere                          | 5           |
| <b>B. Biology/Ecology</b>                      | <b>36</b>   |
| 4. Undesirable (or persistence) traits         | 12          |
| 5. Resource exploitation                       | 2           |
| 6. Reproduction                                | 7           |
| 7. Dispersal mechanisms                        | 9           |
| 8. Tolerance attributes                        | 6           |
| <b>C. Climate change</b>                       | <b>6</b>    |
| 9. Climate change                              | 6           |
| Sectors affected                               |             |
| <b>Commercial</b>                              | <b>18</b>   |
| <b>Environmental</b>                           | <b>16</b>   |
| <b>Species or population nuisance traits</b>   | <b>16</b>   |

| Thresholds     |             |
|----------------|-------------|
| <b>BRA</b>     | <b>-</b>    |
| <b>BRA+CCA</b> | <b>-</b>    |
| Confidence     |             |
| <b>BRA+CCA</b> | <b>0.58</b> |
| <b>BRA</b>     | <b>0.62</b> |
| <b>CCA</b>     | <b>0.25</b> |

| Date and Time       |
|---------------------|
| 16/05/2022 12:54:13 |

## AS-ISK v2

| Taxon and Assessor details         |                                                                                                                                   |
|------------------------------------|-----------------------------------------------------------------------------------------------------------------------------------|
| Category                           | Fishes and Lampreys (freshwater)                                                                                                  |
| Taxon name                         | <i>Gymnocephalus cernua</i>                                                                                                       |
| Common name                        | ruffe                                                                                                                             |
| Assessor                           | Giorgi Epitashvili                                                                                                                |
| Risk screening context             |                                                                                                                                   |
| Reason and socio-economic benefits | The Eurasian ruffe ( <i>Gymnocephalus cernua</i> ), is a freshwater fish found in temperate regions of                            |
| Risk assessment area               | South Caucasus                                                                                                                    |
| Taxonomy                           | <i>Gymnocephalus cernua</i> (Linnaeus 1758)                                                                                       |
| Native range                       | Europe: Caspian, Black, Baltic and North Sea basins; Great Britain; north to about 69° N in                                       |
| Introduced range                   | It has been introduced to parts of Western Europe (France, northern Italy) and Greece, as well as                                 |
| URL                                | <a href="https://www.fishbase.se/summary/gymnocephalus-cernua.html">https://www.fishbase.se/summary/gymnocephalus-cernua.html</a> |

|                                                |      | Response                                                                                                                                                                | Justification (references and/or other information) | Confidence                                                                                                                                                                                                                                                                                                                                                                                                                                                                                                                                                                                                                                                                                                               |           |
|------------------------------------------------|------|-------------------------------------------------------------------------------------------------------------------------------------------------------------------------|-----------------------------------------------------|--------------------------------------------------------------------------------------------------------------------------------------------------------------------------------------------------------------------------------------------------------------------------------------------------------------------------------------------------------------------------------------------------------------------------------------------------------------------------------------------------------------------------------------------------------------------------------------------------------------------------------------------------------------------------------------------------------------------------|-----------|
| A. Biogeography/Historical                     |      |                                                                                                                                                                         |                                                     |                                                                                                                                                                                                                                                                                                                                                                                                                                                                                                                                                                                                                                                                                                                          |           |
| 1. Domestication/Cultivation                   |      |                                                                                                                                                                         |                                                     |                                                                                                                                                                                                                                                                                                                                                                                                                                                                                                                                                                                                                                                                                                                          |           |
| 1                                              | 1.01 | Has the taxon been the subject of domestication (or cultivation) for at least 20 generations?                                                                           | No                                                  | Although the ruffe once was a popular fish for consumption and its flesh described as delicious and healthy, it has disappeared almost entirely from central, northern and western European food culture. It is no longer sought after in the market.                                                                                                                                                                                                                                                                                                                                                                                                                                                                    | High      |
| 2                                              | 1.02 | Is the taxon harvested in the wild and likely to be sold or used in its live form?                                                                                      | Yes                                                 | Although the ruffe once was a popular fish for consumption and its flesh described as delicious and healthy, it has disappeared almost entirely from central, northern and western European food culture. It is no longer sought after in the market. However, it has survived to some extent as human food in Finland, Estonia, Belarus and Russia. In Finland, it seems to be the roe that still attracts some consumers, especially within restaurants serving the New Nordic Cuisine. In Estonia, it is sold dried and salted as snacks. In Russia, some people still make ukha, the typical clear                                                                                                                   | High      |
| 3                                              | 1.03 | Does the taxon have invasive races, varieties, sub-taxa or congeners?                                                                                                   | No                                                  | No toehr congeners or subspecies as invasive is known                                                                                                                                                                                                                                                                                                                                                                                                                                                                                                                                                                                                                                                                    | High      |
| 2. Climate, distribution and introduction risk |      |                                                                                                                                                                         |                                                     |                                                                                                                                                                                                                                                                                                                                                                                                                                                                                                                                                                                                                                                                                                                          |           |
| 4                                              | 2.01 | How similar are the climatic conditions of the Risk Assessment (RA) area and the taxon's native range?                                                                  | High                                                | Koppen - Geiger climate classification (This species is naturally distributed in the Caucasus region)                                                                                                                                                                                                                                                                                                                                                                                                                                                                                                                                                                                                                    | High      |
| 5                                              | 2.02 | What is the quality of the climate matching data?                                                                                                                       | High                                                | Koppen - Geiger climate classification (This species is naturally distributed in the Caucasus region)                                                                                                                                                                                                                                                                                                                                                                                                                                                                                                                                                                                                                    | High      |
| 6                                              | 2.03 | Is the taxon already present outside of captivity in the RA area?                                                                                                       | Yes                                                 | This species is naturally distributed in the Caucasus region. First record from Georgia was confirmed by Epitashvili et al. (2020)                                                                                                                                                                                                                                                                                                                                                                                                                                                                                                                                                                                       | Very high |
| 7                                              | 2.04 | How many potential vectors could the taxon use to enter in the RA area?                                                                                                 | > 1                                                 | Probably this species spreads within the region by humans unintentionally and by animals (birds, etc.)                                                                                                                                                                                                                                                                                                                                                                                                                                                                                                                                                                                                                   | Medium    |
| 8                                              | 2.05 | Is the taxon currently found in close proximity to, and likely to enter into, the RA area in the near future (e.g. unintentional and intentional introductions)?        | Yes                                                 | Confirmed record of <i>Gymnocephalus cernua</i> (Linnaeus, 1758) (Perciformes: Percidae) as a new exotic species for Turkey (Çiçek et al. 2021)                                                                                                                                                                                                                                                                                                                                                                                                                                                                                                                                                                          | Very high |
| 3. Invasive elsewhere                          |      |                                                                                                                                                                         |                                                     |                                                                                                                                                                                                                                                                                                                                                                                                                                                                                                                                                                                                                                                                                                                          |           |
| 9                                              | 3.01 | Has the taxon become naturalised (established viable populations) outside its native range?                                                                             | Yes                                                 | The ruffe has already invaded Lake Superior and GARP modeling predicts it will find suitable habitat almost everywhere in all five Great lakes.                                                                                                                                                                                                                                                                                                                                                                                                                                                                                                                                                                          | Very high |
| 10                                             | 3.02 | In the taxon's introduced range, are there known adverse impacts to wild stocks or commercial taxa?                                                                     | Yes                                                 | The ruffe has affected fish populations in other areas where introduced. In Scotland, native perch populations declined, and in Russia whitefish numbers have declined because of egg predation by ruffe (McLean 1993)                                                                                                                                                                                                                                                                                                                                                                                                                                                                                                   | Very high |
| 11                                             | 3.03 | In the taxon's introduced range, are there known adverse impacts to aquaculture?                                                                                        | Yes                                                 | <i>G. cernua</i> is the second most costly invasive aquatic taxon in the world (Haubrock et al. 2022).                                                                                                                                                                                                                                                                                                                                                                                                                                                                                                                                                                                                                   | Low       |
| 12                                             | 3.04 | In the taxon's introduced range, are there known adverse impacts to ecosystem                                                                                           | Yes                                                 | Given that <i>G. cernua</i> is the second most costly invasive aquatic taxon in the world it should have a serious impact on ecosystem                                                                                                                                                                                                                                                                                                                                                                                                                                                                                                                                                                                   | Low       |
| 13                                             | 3.05 | In the taxon's introduced range, are there known adverse socio-economic impacts?                                                                                        | Yes                                                 | When ruffe first invaded Lake Superior, it was thought that this species could generate a considerable cost for recreational fishing, particularly by causing a decline in yellow perch ( <i>Perca flavescens</i> ) populations (Leigh 1998). Under a moderate scenario of spread and impact, it was predicted that ruffe could generate costs in excess of \$500 million by 2050 (Leigh 1998). However, these concerns have yet to be confirmed as the extent of ruffe's contribution to declines in native fish populations remains undecided (Czypinski et al. 2007). Ruffe abundance appeared to remain stable or decline annually in Lake Superior as late as 2001-2005 (Czypinski et al. 2007, Gorman et al. 2010) | Very high |
| B. Biology/Ecology                             |      |                                                                                                                                                                         |                                                     |                                                                                                                                                                                                                                                                                                                                                                                                                                                                                                                                                                                                                                                                                                                          |           |
| 4. Undesirable (or persistence) traits         |      |                                                                                                                                                                         |                                                     |                                                                                                                                                                                                                                                                                                                                                                                                                                                                                                                                                                                                                                                                                                                          |           |
| 14                                             | 4.01 | Is it likely that the taxon will be poisonous or pose other risks to human health?                                                                                      | No                                                  | This species does not pose a threat to humans.                                                                                                                                                                                                                                                                                                                                                                                                                                                                                                                                                                                                                                                                           | High      |
| 15                                             | 4.02 | Is it likely that the taxon will smother one or more native taxa (that are not threatened or protected)?                                                                | Yes                                                 | The ruffe has affected fish populations in other areas where introduced. In Scotland, native perch populations declined, and in Russia whitefish numbers have declined because of egg predation by ruffe (McLean 1993).                                                                                                                                                                                                                                                                                                                                                                                                                                                                                                  | Very high |
| 16                                             | 4.03 | Are there any threatened or protected taxa that the non-native taxon would parasitise in the RA area?                                                                   | Yes                                                 | There are meny threatened and protected species in the Caucasus region which may be influenced by Ruffe: <i>Luciobarbus capito</i> , <i>L. mursa</i> , <i>Salmo</i> spp, <i>Rutilus</i> spp, etc.                                                                                                                                                                                                                                                                                                                                                                                                                                                                                                                        | Very high |
| 17                                             | 4.04 | Is the taxon adaptable in terms of climatic and other environmental conditions, thus enhancing its potential persistence if it has invaded or could invade the RA area? | Yes                                                 | This species naturally inhabits the region and environmental conditions are acceptable to it.                                                                                                                                                                                                                                                                                                                                                                                                                                                                                                                                                                                                                            | Very high |

|                                 |      |                                                                                                                                                                 |                |                                                                                                                                                                                                                                                                                                                                                                                           |           |
|---------------------------------|------|-----------------------------------------------------------------------------------------------------------------------------------------------------------------|----------------|-------------------------------------------------------------------------------------------------------------------------------------------------------------------------------------------------------------------------------------------------------------------------------------------------------------------------------------------------------------------------------------------|-----------|
| 18                              | 4.05 | Is the taxon likely to disrupt food-web structure/function in aquatic ecosystems if it has invaded or is likely to invade the RA                                | Yes            | Such a case is expected if this species is widespread in the region.                                                                                                                                                                                                                                                                                                                      | Low       |
| 19                              | 4.06 | Is the taxon likely to exert adverse impacts on ecosystem services in the RA area?                                                                              | Yes            | Such a case is expected if this species is widespread in the region.                                                                                                                                                                                                                                                                                                                      | Low       |
| 20                              | 4.07 | Is it likely that the taxon will host, and/or act as a vector for, recognised pests and infectious agents that are endemic in the RA                            | Not applicable | No research has been conducted in this direction.                                                                                                                                                                                                                                                                                                                                         | Low       |
| 21                              | 4.08 | Is it likely that the taxon will host, and/or act as a vector for, recognised pests and infectious agents that are absent from (novel to) the RA area?          | Not applicable | No research has been conducted in this direction.                                                                                                                                                                                                                                                                                                                                         | Low       |
| 22                              | 4.09 | Is it likely that the taxon will achieve a body size that will make it more likely to be released from captivity?                                               | Yes            | Max length of Ruffe is 25.0 cm TL male/unsexed; common length : 12.0 cm TL male/unsexed; max. published weight: 400.00 g, so this species can be used in aquaculture.                                                                                                                                                                                                                     | High      |
| 23                              | 4.10 | Is the taxon capable of sustaining itself in a range of water velocity conditions (e.g. versatile in habitat use)?                                              | No             | Inhabits eutrophic lakes, lowland and piedmont rivers. Most abundant in estuaries of large rivers, brackish lakes with salinities up to 10-12 ppt and reservoirs. In general, its abundance increases with increased eutrophication. Reported to prefer still or slow-flowing water with soft bottom and without vegetation and deep water with deposits of sand and gravel.              | Medium    |
| 24                              | 4.11 | Is it likely that the taxon's mode of existence (e.g. excretion of by-products) or behaviours (e.g. feeding) will reduce habitat quality for native taxa?       | No             | Data deficient                                                                                                                                                                                                                                                                                                                                                                            | Low       |
| 25                              | 4.12 | Is the taxon likely to maintain a viable population even when present in low densities (or persisting in adverse conditions by way of a dormant form)?          | Yes            | Data deficient                                                                                                                                                                                                                                                                                                                                                                            | Low       |
| <b>5. Resource exploitation</b> |      |                                                                                                                                                                 |                |                                                                                                                                                                                                                                                                                                                                                                                           |           |
| 26                              | 5.01 | Is the taxon likely to consume threatened or protected native taxa in the RA area?                                                                              | Yes            | Ruffe is a predator/omnivore species and can consume threatened or protected species in the region: <i>L. mursa</i> , <i>L. capito</i> , <i>Salmo</i> spp, <i>Acipenser</i> spp, etc.                                                                                                                                                                                                     | Medium    |
| 27                              | 5.02 | Is the taxon likely to sequester food resources (including nutrients) to the detriment of native taxa in the RA area?                                           | Yes            | Ruffe is a predator/omnivore species and may be competitor for native species in terms of food and nutrient extraction.                                                                                                                                                                                                                                                                   | High      |
| <b>6. Reproduction</b>          |      |                                                                                                                                                                 |                |                                                                                                                                                                                                                                                                                                                                                                                           |           |
| 28                              | 6.01 | Is the taxon likely to exhibit parental care and/or to reduce age-at-maturity in response to environmental conditions?                                          | No             | Data deficient                                                                                                                                                                                                                                                                                                                                                                            | Low       |
| 29                              | 6.02 | Is the taxon likely to produce viable gametes or propagules (in the RA area)?                                                                                   | Yes            | It seems that this species is naturally reproduces in the region                                                                                                                                                                                                                                                                                                                          | High      |
| 30                              | 6.03 | Is the taxon likely to hybridise naturally with native taxa?                                                                                                    | Yes            | Such fact is not detected in the SC region. Natural hybridization between ruffe and perch has been recorded in the past. Regan (1911) cites a 1907 reference for perch and ruffe hybrids in the Danube, noting that "these hybrids are not fertile per se, but are quite fertile with either parent!" (see also Holcik and Hensel 1974). So far there is no evidence that ruffe have been | Very high |
| 31                              | 6.04 | Is the taxon likely to be hermaphroditic or to display asexual reproduction?                                                                                    | No             | Data deficient                                                                                                                                                                                                                                                                                                                                                                            | Medium    |
| 32                              | 6.05 | Is the taxon dependent on the presence of another taxon (or specific habitat features) to complete its life cycle?                                              | No             | Own judgement                                                                                                                                                                                                                                                                                                                                                                             | Medium    |
| 33                              | 6.06 | Is the taxon known (or likely) to produce a large number of propagules or offspring within a short time span (e.g. < 1 year)?                                   | Yes            | The ruffe has the capacity to reproduce at an extremely high rate. A ruffe usually matures in two to three years, but a ruffe that lives in warmer waters has the ability to reproduce in the first year of life. A single female has the potential to lay from 130,000 to 200,000 eggs annually.                                                                                         | Very high |
| 34                              | 6.07 | How many time units (days, months, years) does the taxon require to reach the age-at-first-reproduction?                                                        | 1              | A ruffe usually matures in two to three years, but a ruffe that lives in warmer waters has the ability to reproduce in the first year of life.                                                                                                                                                                                                                                            | Very high |
| <b>7. Dispersal mechanisms</b>  |      |                                                                                                                                                                 |                |                                                                                                                                                                                                                                                                                                                                                                                           |           |
| 35                              | 7.01 | How many potential internal vectors/pathways could the taxon use to disperse within the RA area (with suitable                                                  | > 1            | This species can be spread within the SC region naturally and artificially by humans.                                                                                                                                                                                                                                                                                                     | Medium    |
| 36                              | 7.02 | Will any of these vectors/pathways bring the taxon in close proximity to one or more protected areas (e.g. MCZ, MPA, SSSI)?                                     | Yes            | There is a probability of that exist                                                                                                                                                                                                                                                                                                                                                      | Medium    |
| 37                              | 7.03 | Does the taxon have a means of actively attaching itself to hard substrata (e.g. ship hulls, pilings, buoys) such that it enhances the likelihood of dispersal? | No             | The ruffe was probably introduced in US via ship ballast water discharged from a vessel arriving from a Eurasian port.                                                                                                                                                                                                                                                                    | Medium    |
| 38                              | 7.04 | Is natural dispersal of the taxon likely to occur as eggs (for animals) or as propagules (for plants: seeds, spores) in the RA area?                            | Yes            | This species should breed naturally in the region                                                                                                                                                                                                                                                                                                                                         | Medium    |
| 39                              | 7.05 | Is natural dispersal of the taxon likely to occur as larvae/juveniles (for animals) or as fragments/seedlings (for plants) in the RA area?                      | Yes            | This species should breed naturally in the region                                                                                                                                                                                                                                                                                                                                         | Medium    |
| 40                              | 7.06 | Are older life stages of the taxon likely to migrate in the RA area for reproduction?                                                                           | No             | Data deficient                                                                                                                                                                                                                                                                                                                                                                            | Low       |
| 41                              | 7.07 | Are propagules or eggs of the taxon likely to be dispersed in the RA area by other animals?                                                                     | Yes            | There is a probability of that exist                                                                                                                                                                                                                                                                                                                                                      | Medium    |

|                                |      |                                                                                                                                                                                           |          |                                                                                                                                                                                                                                                                                                                                                                                                                                                                                                                                                                                                                                                       |           |
|--------------------------------|------|-------------------------------------------------------------------------------------------------------------------------------------------------------------------------------------------|----------|-------------------------------------------------------------------------------------------------------------------------------------------------------------------------------------------------------------------------------------------------------------------------------------------------------------------------------------------------------------------------------------------------------------------------------------------------------------------------------------------------------------------------------------------------------------------------------------------------------------------------------------------------------|-----------|
| 42                             | 7.08 | Is dispersal of the taxon along any of the vectors/pathways mentioned in the previous seven questions (35–41; i.e. both unintentional or intentional) likely to be                        | Yes      | There is a probability of that exist                                                                                                                                                                                                                                                                                                                                                                                                                                                                                                                                                                                                                  | Medium    |
| 43                             | 7.09 | Is dispersal of the taxon density dependent?                                                                                                                                              | Yes      | Data deficient                                                                                                                                                                                                                                                                                                                                                                                                                                                                                                                                                                                                                                        | Low       |
| <b>8. Tolerance attributes</b> |      |                                                                                                                                                                                           |          |                                                                                                                                                                                                                                                                                                                                                                                                                                                                                                                                                                                                                                                       |           |
| 44                             | 8.01 | Is the taxon able to withstand being out of water for extended periods (e.g. minimum of one or more hours) at some stage of its life cycle?                                               | No       | No such fact has been described                                                                                                                                                                                                                                                                                                                                                                                                                                                                                                                                                                                                                       | High      |
| 45                             | 8.02 | Is the taxon tolerant of a wide range of water quality conditions relevant to that taxon? [In the Justification field, indicate the relevant water quality variable(s) being considered.] | Yes      | Adult Ruffe has characteristics that allow them to adapt to a range of environments, including rapid maturation, relatively long life and large size (allowing them to reproduce many times in large batches), batch spawning, genotype and phenotype (having plasticity in their genetic expression), tolerance to a wide range of water quality (Gutsch & Hoffman 2016).                                                                                                                                                                                                                                                                            | Very high |
| 46                             | 8.03 | Can the taxon be controlled or eradicated in the wild with chemical, biological, or other agents/means?                                                                                   | Yes      | Ever since the ruffe was introduced into the Great Lakes system, scientists and fishery managers have been searching for the right way to get rid of them. In the beginning, the main method of control was to increase the Walleye and Northern Pike populations, because they are natural predators of the ruffe. Other methods that have been considered are poison and chemical control. If a large school of ruffe is found, they can be poisoned. If some survive, however, they will rapidly reproduce. Chemicals can be targeted to act on specific species of fish. The chemical lampricide TFM kills ruffe, but leaves other fish unharmed. | High      |
| 47                             | 8.04 | Is the taxon likely to tolerate or benefit from environmental/human disturbance?                                                                                                          | Yes      | The ruffe was probably introduced in US via ship ballast water discharged from a vessel arriving from a Eurasian port.                                                                                                                                                                                                                                                                                                                                                                                                                                                                                                                                | High      |
| 48                             | 8.05 | Is the taxon able to tolerate salinity levels that are higher or lower than those found in its usual environment?                                                                         | Yes      | Ruffe tolerate a wide range of salinity (0–12 ppt) (Lind 1977).                                                                                                                                                                                                                                                                                                                                                                                                                                                                                                                                                                                       | High      |
| 49                             | 8.06 | Are there effective natural enemies (predators) of the taxon present in the RA area?                                                                                                      | Yes      | Esox lucius is a natural predators of the ruffe and distributed in the South Caucasus region. There are also other species which can controll ruffes population: Birds, Snakes, Otters, Sander lucioperca, Silurus glanis, Squalius spp, etc.                                                                                                                                                                                                                                                                                                                                                                                                         | Very high |
| <b>C. Climate change</b>       |      |                                                                                                                                                                                           |          |                                                                                                                                                                                                                                                                                                                                                                                                                                                                                                                                                                                                                                                       |           |
| <b>9. Climate change</b>       |      |                                                                                                                                                                                           |          |                                                                                                                                                                                                                                                                                                                                                                                                                                                                                                                                                                                                                                                       |           |
| 50                             | 9.01 | Under the predicted future climatic conditions, are the risks of entry into the RA area posed by the taxon likely to increase, decrease or not change?                                    | Increase | Such fact has been detected in East Georgia, where Ruffe was cateched by anglers in Taribana reservoir.                                                                                                                                                                                                                                                                                                                                                                                                                                                                                                                                               | High      |
| 51                             | 9.02 | Under the predicted future climatic conditions, are the risks of establishment posed by the taxon likely to increase, decrease or not change?                                             | Increase | Such fact has been detected in East Georgia, where Ruffe was cateched by anglers in Taribana reservoir.                                                                                                                                                                                                                                                                                                                                                                                                                                                                                                                                               | High      |
| 52                             | 9.03 | Under the predicted future climatic conditions, are the risks of dispersal within the RA area posed by the taxon likely to increase, decrease or not change?                              | Increase | Own judgement                                                                                                                                                                                                                                                                                                                                                                                                                                                                                                                                                                                                                                         | Medium    |
| 53                             | 9.04 | Under the predicted future climatic conditions, what is the likely magnitude of future potential impacts on biodiversity and/or ecological integrity/status?                              | Higher   | Own judgement                                                                                                                                                                                                                                                                                                                                                                                                                                                                                                                                                                                                                                         | Medium    |
| 54                             | 9.05 | Under the predicted future climatic conditions, what is the likely magnitude of future potential impacts on ecosystem structure and/or function?                                          | Higher   | Own judgement                                                                                                                                                                                                                                                                                                                                                                                                                                                                                                                                                                                                                                         | Medium    |
| 55                             | 9.06 | Under the predicted future climatic conditions, what is the likely magnitude of future potential impacts on ecosystem services/socio-economic factors?                                    | Higher   | Own judgement                                                                                                                                                                                                                                                                                                                                                                                                                                                                                                                                                                                                                                         | Medium    |

| Statistics                                     |      |
|------------------------------------------------|------|
| Scores                                         |      |
| BRA                                            | 46.0 |
| BRA Outcome                                    | -    |
| BRA+CCA                                        | 58.0 |
| BRA+CCA Outcome                                | -    |
| Score partition                                |      |
| A. Biogeography/Historical                     | 20.0 |
| 1. Domestication/Cultivation                   | 0.0  |
| 2. Climate, distribution and introduction risk | 2.0  |
| 3. Invasive elsewhere                          | 18.0 |
| B. Biology/Ecology                             | 26.0 |
| 4. Undesirable (or persistence) traits         | 7.0  |
| 5. Resource exploitation                       | 7.0  |
| 6. Reproduction                                | 4.0  |
| 7. Dispersal mechanisms                        | 5.0  |
| 8. Tolerance attributes                        | 3.0  |
| C. Climate change                              | 12.0 |
| 9. Climate change                              | 12.0 |
| Answered Questions                             |      |
| Total                                          | 55   |
| A. Biogeography/Historical                     | 13   |
| 1. Domestication/Cultivation                   | 3    |

|                                                       |           |
|-------------------------------------------------------|-----------|
| 2. <i>Climate, distribution and introduction risk</i> | 5         |
| 3. <i>Invasive elsewhere</i>                          | 5         |
| <b>B. Biology/Ecology</b>                             | <b>36</b> |
| 4. <i>Undesirable (or persistence) traits</i>         | 12        |
| 5. <i>Resource exploitation</i>                       | 2         |
| 6. <i>Reproduction</i>                                | 7         |
| 7. <i>Dispersal mechanisms</i>                        | 9         |
| 8. <i>Tolerance attributes</i>                        | 6         |
| <b>C. Climate change</b>                              | <b>6</b>  |
| 9. <i>Climate change</i>                              | 6         |
| <b>Sectors affected</b>                               |           |
| Commercial                                            | 19        |
| Environmental                                         | 16        |
| <b>Species or population nuisance traits</b>          | <b>28</b> |

|                   |  |      |
|-------------------|--|------|
| <b>Thresholds</b> |  |      |
| BRA               |  | -    |
| BRA+CCA           |  | -    |
| <b>Confidence</b> |  |      |
| BRA+CCA           |  | 0.64 |
| BRA               |  | 0.64 |
| CCA               |  | 0.58 |

|                      |  |
|----------------------|--|
| <b>Date and Time</b> |  |
| 16/05/2022 12:55:12  |  |

AS-ISK v2

| Taxon and Assessor details         |                                                                                                                                   |
|------------------------------------|-----------------------------------------------------------------------------------------------------------------------------------|
| Category                           | Fishes and Lampreys (freshwater)                                                                                                  |
| Taxon name                         | <i>Gymnocephalus cernua</i>                                                                                                       |
| Common name                        | ruffe                                                                                                                             |
| Assessor                           | Tatia Kuljanishvili                                                                                                               |
| Risk screening context             |                                                                                                                                   |
| Reason and socio-economic benefits | Ruffe, <i>Gymnocephalus cernua</i> (Linnaeus, 1758), has caused substantial ecological damage in North                            |
| Risk assessment area               | South Caucasus                                                                                                                    |
| Taxonomy                           | Actinopterygii (ray-finned fishes) Perciformes (Perch-likes) Percidae (Perches) Percinae                                          |
| Native range                       | Basin of Northern Black Sea and Sea of Azov: Dneistr, South Bug, Dniepr, Don and Kuban drainages.                                 |
| Introduced range                   | Has established populations in Lakes in Italy, England, Scotland, Wales, Germany, Austria,                                        |
| URL                                | <a href="https://www.fishbase.de/summary/Gymnocephalus-cernua.html">https://www.fishbase.de/summary/Gymnocephalus-cernua.html</a> |

|                                                |      |                                                                                                                                                                         | Response | Justification (references and/or other information)                                                                                                                                                                                    | Confidence |
|------------------------------------------------|------|-------------------------------------------------------------------------------------------------------------------------------------------------------------------------|----------|----------------------------------------------------------------------------------------------------------------------------------------------------------------------------------------------------------------------------------------|------------|
| A. Biogeography/Historical                     |      |                                                                                                                                                                         |          |                                                                                                                                                                                                                                        |            |
| 1. Domestication/Cultivation                   |      |                                                                                                                                                                         |          |                                                                                                                                                                                                                                        |            |
| 1                                              | 1.01 | Has the taxon been the subject of domestication (or cultivation) for at least 20 generations?                                                                           | No       | This species is not a subject of domestication                                                                                                                                                                                         | Very high  |
| 2                                              | 1.02 | Is the taxon harvested in the wild and likely to be sold or used in its live form?                                                                                      | Yes      | Used to be an object of commercial fishing around coastal regions of Baltic sea (Gutsch & Hoffman); In South-eastern England it has been introduced as live bait which has lead to it's successful establishment (Copp et al, 2005).   | High       |
| 3                                              | 1.03 | Does the taxon have invasive races, varieties, sub-taxa or congeners?                                                                                                   | Yes      | Perca fluviatilis and Sander lucioperca are also known as an introduced species                                                                                                                                                        | High       |
| 2. Climate, distribution and introduction risk |      |                                                                                                                                                                         |          |                                                                                                                                                                                                                                        |            |
| 4                                              | 2.01 | How similar are the climatic conditions of the Risk Assessment (RA) area and the taxon's native range?                                                                  | High     | Similar. According to Climatch application its 9 out of 10                                                                                                                                                                             | Very high  |
| 5                                              | 2.02 | What is the quality of the climate matching data?                                                                                                                       | High     | Quality of climate matching data is high                                                                                                                                                                                               | Very high  |
| 6                                              | 2.03 | Is the taxon already present outside of captivity in the RA area?                                                                                                       | Yes      | Yes. It has been found in the rivers of north-weast Georgia (pers. comm. G. Epitashvili)                                                                                                                                               | Very high  |
| 7                                              | 2.04 | How many potential vectors could the taxon use to enter in the RA area?                                                                                                 | >1       | Recreational fisheries, aquaculture, ornamental trade, natural dispersal.                                                                                                                                                              | High       |
| 8                                              | 2.05 | Is the taxon currently found in close proximity to, and likely to enter into, the RA area in the near future (e.g. unintentional and intentional introductions)?        | Yes      | The RA is a neighbouring area of G. cernua native range                                                                                                                                                                                | Very high  |
| 3. Invasive elsewhere                          |      |                                                                                                                                                                         |          |                                                                                                                                                                                                                                        |            |
| 9                                              | 3.01 | Has the taxon become naturalised (established viable populations) outside its native range?                                                                             | Yes      | Introduced and have become established (even invasive) in France; Northern Italy, northern Great Britain, the Great Lakes; North America (Kottelat & Freyhof, 2007), Germany, Austria, Switzerland and Norway (Gutsch & Hoffman, 2016) | Very high  |
| 10                                             | 3.02 | In the taxon's introduced range, are there known adverse impacts to wild stocks or commercial taxa?                                                                     | Yes      | It was suggested that in introduced lakes G. cernua was affecting the native Coregonid species, However it is not well documented (Copp. et al 2005).                                                                                  | Medium     |
| 11                                             | 3.03 | In the taxon's introduced range, are there known adverse impacts to aquaculture?                                                                                        | Yes      | Since the existance of G. cernua in new environment is affecting native organisms throught competition, we can assume it will affect the aquaculture                                                                                   | Medium     |
| 12                                             | 3.04 | In the taxon's introduced range, are there known adverse impacts to ecosystem                                                                                           | Yes      | provisioning - can affect production of food (trade important coregonids); cultural - can affect recreational fisheries.                                                                                                               | Medium     |
| 13                                             | 3.05 | In the taxon's introduced range, are there known adverse socio-economic impacts?                                                                                        | Yes      | G. cernua is oppressing native Perca fluviatilis populations which are the main resource for the lakes fishermen (Lorenzoni et al                                                                                                      | Low        |
| B. Biology/Ecology                             |      |                                                                                                                                                                         |          |                                                                                                                                                                                                                                        |            |
| 4. Undesirable (or persistence) traits         |      |                                                                                                                                                                         |          |                                                                                                                                                                                                                                        |            |
| 14                                             | 4.01 | Is it likely that the taxon will be poisonous or pose other risks to human health?                                                                                      | No       | Not poisonous                                                                                                                                                                                                                          | Very high  |
| 15                                             | 4.02 | Is it likely that the taxon will smother one or more native taxa (that are not threatened or protected)?                                                                | Yes      | G. cernua is oppressing native Perca fluviatilis and Coregonid fish populations.                                                                                                                                                       | High       |
| 16                                             | 4.03 | Are there any threatened or protected taxa that the non-native taxon would parasitise in the RA area?                                                                   | No       | Not parasite, however, can be predating on young of the year or small native fishes.                                                                                                                                                   | Low        |
| 17                                             | 4.04 | Is the taxon adaptable in terms of climatic and other environmental conditions, thus enhancing its potential persistence if it has invaded or could invade the RA area? | Yes      | Ruffe can tolerate to very low temperature conditions. It is also very tolerant to in waters ranging from oligotrophic to eutrophic. Thanks to advance lateral line and sensori organs it can easily coordinate in turbid waters.      | Medium     |
| 18                                             | 4.05 | Is the taxon likely to disrupt food-web structure/function in aquatic ecosystems if it has invaded or is likely to invade the RA                                        | Yes      | It can affect native organisms through competition for food due to niche overlap; consume fish eggs, and can prey on young- of-the-year fish or small fishes.                                                                          | High       |
| 19                                             | 4.06 | Is the taxon likely to exert adverse impacts on ecosystem services in the RA area?                                                                                      | Yes      | Can affect production of food (aquaculture); cultural - can affect recreational fisheries.                                                                                                                                             | Medium     |
| 20                                             | 4.07 | Is it likely that the taxon will host, and/or act as a vector for, recognised pests and infectious agents that are endemic in the RA                                    | No       | No information                                                                                                                                                                                                                         | Low        |
| 21                                             | 4.08 | Is it likely that the taxon will host, and/or act as a vector for, recognised pests and infectious agents that are absent from (novel to) the RA area?                  | No       | No information                                                                                                                                                                                                                         | Low        |
| 22                                             | 4.09 | Is it likely that the taxon will achieve a body size that will make it more likely to be released from captivity?                                                       | No       | It is a small body sized organism (12 cm).                                                                                                                                                                                             | High       |

|                                 |      |                                                                                                                                                                              |                |                                                                                                                                                                                                                                                                                                                                                                                                                                                                                                             |           |
|---------------------------------|------|------------------------------------------------------------------------------------------------------------------------------------------------------------------------------|----------------|-------------------------------------------------------------------------------------------------------------------------------------------------------------------------------------------------------------------------------------------------------------------------------------------------------------------------------------------------------------------------------------------------------------------------------------------------------------------------------------------------------------|-----------|
| 23                              | 4.10 | Is the taxon capable of sustaining itself in a range of water velocity conditions (e.g. versatile in habitat use)?                                                           | No             | it prefers still slow-flowing rivers, estuaries, brackish lakes.                                                                                                                                                                                                                                                                                                                                                                                                                                            | Medium    |
| 24                              | 4.11 | Is it likely that the taxon's mode of existence (e.g. excretion of by-products) or behaviours (e.g. feeding) will reduce habitat quality for native taxa?                    | Yes            | Can feed in low light, in deep and oligotrophic conditions. can alter population dynamics of prey (benthic invertebrates and zooplankton prey), competes with fishes                                                                                                                                                                                                                                                                                                                                        | High      |
| 25                              | 4.12 | Is the taxon likely to maintain a viable population even when present in low densities (or persisting in adverse conditions by way of a dormant form)?                       | Yes            | In North America, Ruffe was introduced to the Laurentian Great Lakes in the 1980s via ballast water releases, establishing populations in both US and Canadian waters of Lake Superior, Lake Michigan, MI, and Lake Huron, MI. Propagule pressure (i.e., the abundance and frequency of Ruffe introduced) on the Great Lakes has been low (Kolar and Lodge 2001); genetic evidence suggests there was a single founding population from the Elbe River drainage region. Germany (Stepien et al. 2005)" (See | High      |
| <b>5. Resource exploitation</b> |      |                                                                                                                                                                              |                |                                                                                                                                                                                                                                                                                                                                                                                                                                                                                                             |           |
| 26                              | 5.01 | Is the taxon likely to consume threatened or protected native taxa in the RA area?                                                                                           | Yes            | There is no updated res list assessments for RA countries. However, we can assume that G. cernua can affect endangered benthic invertebrates and fish fry.                                                                                                                                                                                                                                                                                                                                                  | Medium    |
| 27                              | 5.02 | Is the taxon likely to sequester food resources (including nutrients) to the detriment of native taxa in the RA area?                                                        | Yes            | Neogobius melanostomus has a RIP score of 2.83. therefore, I assume that G. cernua can be the sequester for food resources, because this two species were almost at the same rate invading                                                                                                                                                                                                                                                                                                                  | Medium    |
| <b>6. Reproduction</b>          |      |                                                                                                                                                                              |                |                                                                                                                                                                                                                                                                                                                                                                                                                                                                                                             |           |
| 28                              | 6.01 | Is the taxon likely to exhibit parental care and/or to reduce age-at-maturity in response to environmental conditions?                                                       | Yes            | Early maturity could be caused by a response to high mortality rates at the population level (Lind 1977) or to warmer water at a physiological level (Fedorova and Vetkasov 1974; Craig 1987).                                                                                                                                                                                                                                                                                                              | High      |
| 29                              | 6.02 | Is the taxon likely to produce viable gametes or propagules (in the RA area)?                                                                                                | Yes            | RA conditions are favourable for maturation and reproduction of G. cernua                                                                                                                                                                                                                                                                                                                                                                                                                                   | Very high |
| 30                              | 6.03 | Is the taxon likely to hybridise naturally with native taxa?                                                                                                                 | No             | No information available                                                                                                                                                                                                                                                                                                                                                                                                                                                                                    | High      |
| 31                              | 6.04 | Is the taxon likely to be hermaphroditic or to display asexual reproduction?                                                                                                 | No             | No. Does not display asexual reproduction <a href="https://www.fishbase.de/summary/4474">https://www.fishbase.de/summary/4474</a>                                                                                                                                                                                                                                                                                                                                                                           | Very high |
| 32                              | 6.05 | Is the taxon dependent on the presence of another taxon (or specific habitat features) to complete its life cycle?                                                           | No             | No See" <a href="https://www.fishbase.de/summary/4474">https://www.fishbase.de/summary/4474</a>                                                                                                                                                                                                                                                                                                                                                                                                             | Very high |
| 33                              | 6.06 | Is the taxon known (or likely) to produce a large number of propagules or offspring within a short time span (e.g. < 1 year)?                                                | Yes            | sexual maturity occurs at 1-3 y.o. during season they spawn multiple times. Especially in non-native range. for instance "In Lake Glubokoe in the Moscow region of Russia, Ruffe spawned up to three batches in a two-month period (Koshelev 1963)."                                                                                                                                                                                                                                                        | High      |
| 34                              | 6.07 | How many time units (days, months, years) does the taxon require to reach the age-at-first-reproduction?                                                                     | 2              | 1-3.                                                                                                                                                                                                                                                                                                                                                                                                                                                                                                        | Medium    |
| <b>7. Dispersal mechanisms</b>  |      |                                                                                                                                                                              |                |                                                                                                                                                                                                                                                                                                                                                                                                                                                                                                             |           |
| 35                              | 7.01 | How many potential internal vectors/pathways could the taxon use to disperse within the RA area (with suitable                                                               | >1             | Recreational fisheries, aquaculture, local hobbyists (international releases for curiosities), natural dispersal.                                                                                                                                                                                                                                                                                                                                                                                           | High      |
| 36                              | 7.02 | Will any of these vectors/pathways bring the taxon in close proximity to one or more protected areas (e.g. MCZ, MPA, SSSI)?                                                  | Yes            | appearing of G. cernua in flowing waters will bring it to the protected areas.                                                                                                                                                                                                                                                                                                                                                                                                                              | High      |
| 37                              | 7.03 | Does the taxon have a means of actively attaching itself to hard substrata (e.g. ship hulls, pilings, buoys) such that it enhances the likelihood of dispersal?              | No             | No morphological structure that would allow to attach to different surfaces.                                                                                                                                                                                                                                                                                                                                                                                                                                | High      |
| 38                              | 7.04 | Is natural dispersal of the taxon likely to occur as eggs (for animals) or as propagules (for plants: seeds, spores) in the RA area?                                         | No             | No. can not be distributed as eggs.                                                                                                                                                                                                                                                                                                                                                                                                                                                                         | Medium    |
| 39                              | 7.05 | Is natural dispersal of the taxon likely to occur as larvae/juveniles (for animals) or as fragments/seedlings (for plants) in the RA area?                                   | No             | No. Less likely                                                                                                                                                                                                                                                                                                                                                                                                                                                                                             | High      |
| 40                              | 7.06 | Are older life stages of the taxon likely to migrate in the RA area for reproduction?                                                                                        | No             | Does not migrate for reproduction                                                                                                                                                                                                                                                                                                                                                                                                                                                                           | High      |
| 41                              | 7.07 | Are propagules or eggs of the taxon likely to be dispersed in the RA area by other animals?                                                                                  | No             | No. Can not be dispersed by other animals                                                                                                                                                                                                                                                                                                                                                                                                                                                                   | High      |
| 42                              | 7.08 | Is dispersal of the taxon along any of the vectors/pathways mentioned in the previous seven questions (35-41; i.e. both unintentional or intentional) likely to be           | Not applicable | We do not really know the exact time of it's appearance in the region therefore it is difficult to answer this question.                                                                                                                                                                                                                                                                                                                                                                                    | Low       |
| 43                              | 7.09 | Is dispersal of the taxon density dependent?                                                                                                                                 | No             | Not documented                                                                                                                                                                                                                                                                                                                                                                                                                                                                                              | High      |
| <b>8. Tolerance attributes</b>  |      |                                                                                                                                                                              |                |                                                                                                                                                                                                                                                                                                                                                                                                                                                                                                             |           |
| 44                              | 8.01 | Is the taxon able to withstand being out of water for extended periods (e.g. minimum of one or more hours) at some stage of its life cycle?                                  | No             | No information available                                                                                                                                                                                                                                                                                                                                                                                                                                                                                    | High      |
| 45                              | 8.02 | Is the taxon tolerant of a wide range of water quality conditions relevant to that taxon? [In the Justification field, indicate the relevant water quality variable(s) being | Yes            | G. cernua exhibits plasticity with regard to chemical, physical, biological, and habitat requirements (See Gutsch & Hoffman, 2016)                                                                                                                                                                                                                                                                                                                                                                          | Medium    |
| 46                              | 8.03 | Can the taxon be controlled or eradicated in the wild with chemical, biological, or other agents/means?                                                                      | No             | "In dealing with invasive species, eradication is obviously the favoured strategy and several studies have demonstrated its success. However, success has been limited to small, isolated biotopes, on a local scale and in the early stages of invasion (Z a v a l e t a et al. 2001). Fishery experts concur that eradication of the ruffe is not possible (B u s i a h n 1996), as the species is capable of rapid population increase and range expansion (See                                          | Low       |

|                          |      |                                                                                                                                                              |           |                                                                                                                                                                                                                                                      |        |
|--------------------------|------|--------------------------------------------------------------------------------------------------------------------------------------------------------------|-----------|------------------------------------------------------------------------------------------------------------------------------------------------------------------------------------------------------------------------------------------------------|--------|
| 47                       | 8.04 | Is the taxon likely to tolerate or benefit from environmental/human disturbance?                                                                             | Yes       | Can tolerate eutrophication                                                                                                                                                                                                                          | Medium |
| 48                       | 8.05 | Is the taxon able to tolerate salinity levels that are higher or lower than those found in its usual environment?                                            | No        | Can tolerate salinities up to 10-12%.                                                                                                                                                                                                                | High   |
| 49                       | 8.06 | Are there effective natural enemies (predators) of the taxon present in the RA                                                                               | No        | No information available                                                                                                                                                                                                                             | Medium |
| <b>C. Climate change</b> |      |                                                                                                                                                              |           |                                                                                                                                                                                                                                                      |        |
| <b>9. Climate change</b> |      |                                                                                                                                                              |           |                                                                                                                                                                                                                                                      |        |
| 50                       | 9.01 | Under the predicted future climatic conditions, are the risks of entry into the RA area posed by the taxon likely to increase, decrease or not change?       | Increase  | It was hypothesized that climate change might alert the mechanisms of transportation and introduction of non-native species. Commercial and recreational activities will increase, that itself increases the propagule pressure levels of non-native | High   |
| 51                       | 9.02 | Under the predicted future climatic conditions, are the risks of establishment posed by the taxon likely to increase, decrease or not change?                | Increase  | Yes. Increase                                                                                                                                                                                                                                        | High   |
| 52                       | 9.03 | Under the predicted future climatic conditions, are the risks of dispersal within the RA area posed by the taxon likely to increase, decrease or not change? | Increase  | So far this species was detected only in northwestern Georgia but it is predicted that it will spread widely.                                                                                                                                        | High   |
| 53                       | 9.04 | Under the predicted future climatic conditions, what is the likely magnitude of future potential impacts on biodiversity and/or ecological integrity/status? | Higher    | Can affect native fish species with competition for food and resources                                                                                                                                                                               | Medium |
| 54                       | 9.05 | Under the predicted future climatic conditions, what is the likely magnitude of future potential impacts on ecosystem structure and/or function?             | No change | It probably will have no change in ecosystem structure or function                                                                                                                                                                                   | Medium |
| 55                       | 9.06 | Under the predicted future climatic conditions, what is the likely magnitude of future potential impacts on ecosystem services/socio-economic factors?       | Higher    | aquaculture and recreational fisheries can be affected                                                                                                                                                                                               | High   |

| Statistics                                     |             |
|------------------------------------------------|-------------|
| Scores                                         |             |
| <b>BRA</b>                                     | <b>38.0</b> |
| <b>BRA Outcome</b>                             | <b>-</b>    |
| <b>BRA+CCA</b>                                 | <b>48.0</b> |
| <b>BRA+CCA Outcome</b>                         | <b>-</b>    |
| Score partition                                |             |
| <b>A. Biogeography/Historical</b>              | <b>22.0</b> |
| 1. Domestication/Cultivation                   | 2.0         |
| 2. Climate, distribution and introduction risk | 2.0         |
| 3. Invasive elsewhere                          | 18.0        |
| <b>B. Biology/Ecology</b>                      | <b>16.0</b> |
| 4. Undesirable (or persistence) traits         | 6.0         |
| 5. Resource exploitation                       | 7.0         |
| 6. Reproduction                                | 2.0         |
| 7. Dispersal mechanisms                        | -3.0        |
| 8. Tolerance attributes                        | 4.0         |
| <b>C. Climate change</b>                       | <b>10.0</b> |
| 9. Climate change                              | 10.0        |
| Answered Questions                             |             |
| <b>Total</b>                                   | <b>55</b>   |
| <b>A. Biogeography/Historical</b>              | <b>13</b>   |
| 1. Domestication/Cultivation                   | 3           |
| 2. Climate, distribution and introduction risk | 5           |
| 3. Invasive elsewhere                          | 5           |
| <b>B. Biology/Ecology</b>                      | <b>36</b>   |
| 4. Undesirable (or persistence) traits         | 12          |
| 5. Resource exploitation                       | 2           |
| 6. Reproduction                                | 7           |
| 7. Dispersal mechanisms                        | 9           |
| 8. Tolerance attributes                        | 6           |
| <b>C. Climate change</b>                       | <b>6</b>    |
| 9. Climate change                              | 6           |
| Sectors affected                               |             |
| <b>Commercial</b>                              | <b>18</b>   |
| <b>Environmental</b>                           | <b>15</b>   |
| <b>Species or population nuisance traits</b>   | <b>19</b>   |

| Thresholds     |             |
|----------------|-------------|
| <b>BRA</b>     | <b>-</b>    |
| <b>BRA+CCA</b> | <b>-</b>    |
| Confidence     |             |
| <b>BRA+CCA</b> | <b>0.67</b> |
| <b>BRA</b>     | <b>0.67</b> |
| <b>CCA</b>     | <b>0.67</b> |

| Date and Time       |
|---------------------|
| 21/05/2022 14:11:34 |



AS-ISK v2

| Taxon and Assessor details         |                                                                                                                                       |
|------------------------------------|---------------------------------------------------------------------------------------------------------------------------------------|
| Category                           | Fishes and Lampreys (freshwater)                                                                                                      |
| Taxon name                         | <i>Hemiculter leucisculus</i>                                                                                                         |
| Common name                        | sharpbelly                                                                                                                            |
| Assessor                           | Bella Japoshvili                                                                                                                      |
| Risk screening context             |                                                                                                                                       |
| Reason and socio-economic benefits | It is a pest fish with no economic value                                                                                              |
| Risk assessment area               | South Caucasus                                                                                                                        |
| Taxonomy                           | Actinopteri (ray-finned fishes) > Cypriniformes (Carp) > Xenocypridae (East Asian minnows)                                            |
| Native range                       | East Asia                                                                                                                             |
| Introduced range                   | Asia, Middle East                                                                                                                     |
| URL                                | <a href="https://www.fishbase.de/summary/Hemiculter-leucisculus.html">https://www.fishbase.de/summary/Hemiculter-leucisculus.html</a> |

|                                                |      |                                                                                                                                                                         | Response | Justification (references and/or other information)                                                                                                                                                                                                                                                                                                                                                                                                                                         | Confidence |
|------------------------------------------------|------|-------------------------------------------------------------------------------------------------------------------------------------------------------------------------|----------|---------------------------------------------------------------------------------------------------------------------------------------------------------------------------------------------------------------------------------------------------------------------------------------------------------------------------------------------------------------------------------------------------------------------------------------------------------------------------------------------|------------|
| A. Biogeography/Historical                     |      |                                                                                                                                                                         |          |                                                                                                                                                                                                                                                                                                                                                                                                                                                                                             |            |
| 1. Domestication/Cultivation                   |      |                                                                                                                                                                         |          |                                                                                                                                                                                                                                                                                                                                                                                                                                                                                             |            |
| 1                                              | 1.01 | Has the taxon been the subject of domestication (or cultivation) for at least 20 generations?                                                                           | No       | This is not a fish with any economic or ornamental value                                                                                                                                                                                                                                                                                                                                                                                                                                    | Very high  |
| 2                                              | 1.02 | Is the taxon harvested in the wild and likely to be sold or used in its live form?                                                                                      | No       | No such fact is known                                                                                                                                                                                                                                                                                                                                                                                                                                                                       | Very high  |
| 3                                              | 1.03 | Does the taxon have invasive races, varieties, sub-taxa or congeners?                                                                                                   | No       | No other congeners or races within species is known as invasive                                                                                                                                                                                                                                                                                                                                                                                                                             | High       |
| 2. Climate, distribution and introduction risk |      |                                                                                                                                                                         |          |                                                                                                                                                                                                                                                                                                                                                                                                                                                                                             |            |
| 4                                              | 2.01 | How similar are the climatic conditions of the Risk Assessment (RA) area and the taxon's native range?                                                                  | High     | Dong, X., Ju, T., Grenouillet, G., Laffaille, P., Lek, S., & Liu, J. (2020). Spatial pattern and determinants of global invasion risk of an invasive species, sharpbelly <i>Hemiculter leucisculus</i> (Basilevsky, 1855). <i>Science of The Total Environment</i> , 711, 134661.                                                                                                                                                                                                           | High       |
| 5                                              | 2.02 | What is the quality of the climate matching data?                                                                                                                       | Medium   | Due to low accuracy of local climate data                                                                                                                                                                                                                                                                                                                                                                                                                                                   | Medium     |
| 6                                              | 2.03 | Is the taxon already present outside of captivity in the RA area?                                                                                                       | Yes      | Esmaeili, H. R., & Gholamifard, A. (2011). Short communication Range extension and translocation for <i>Hemiculter leucisculus</i> (Basilevsky, 1855)(Cyprinidae) in western and northwestern Iran. <i>J. Appl. Ichthyol</i> , 27, 1394-1395; Dong, X., Ju, T., Grenouillet, G., Laffaille, P., Lek, S., & Liu, J. (2020). Spatial pattern and determinants of global invasion risk of an invasive species, sharpbelly <i>Hemiculter leucisculus</i> (Basilevsky, 1855). <i>Science of</i>  | Very high  |
| 7                                              | 2.04 | How many potential vectors could the taxon use to enter in the RA area?                                                                                                 | One      | Accidental translocation                                                                                                                                                                                                                                                                                                                                                                                                                                                                    | Very high  |
| 8                                              | 2.05 | Is the taxon currently found in close proximity to, and likely to enter into, the RA area in the near future (e.g. unintentional and intentional introductions)?        | Yes      | Mustafayev, N. J., Ibrahimov, S. R., & Levin, B. A. (2015). Korean sharpbelly <i>Hemiculter leucisculus</i> (Basilevsky, 1855)(Cypriniformes, Cyprinidae) is a new species of Azerbaijan fauna. <i>Russian journal of biological invasions</i> , 6(4), 252-259.                                                                                                                                                                                                                             | Very high  |
| 3. Invasive elsewhere                          |      |                                                                                                                                                                         |          |                                                                                                                                                                                                                                                                                                                                                                                                                                                                                             |            |
| 9                                              | 3.01 | Has the taxon become naturalised (established viable populations) outside its native range?                                                                             | Yes      | Esmaeili, H. R., & Gholamifard, A. (2011). Short communication Range extension and translocation for <i>Hemiculter leucisculus</i> (Basilevsky, 1855)(Cyprinidae) in western and northwestern Iran. <i>J. Appl. Ichthyol</i> , 27, 1394-1395.; Dong, X., Ju, T., Grenouillet, G., Laffaille, P., Lek, S., & Liu, J. (2020). Spatial pattern and determinants of global invasion risk of an invasive species, sharpbelly <i>Hemiculter leucisculus</i> (Basilevsky, 1855). <i>Science of</i> | Very high  |
| 10                                             | 3.02 | In the taxon's introduced range, are there known adverse impacts to wild stocks or commercial taxa?                                                                     | Yes      | CABI, 2021. <i>Hemiculter leucisculus</i> (common sawbelly). <a href="https://www.cabi.org/isc/datasheet/110574">https://www.cabi.org/isc/datasheet/110574</a> (accessed septembr 2021)                                                                                                                                                                                                                                                                                                     | High       |
| 11                                             | 3.03 | In the taxon's introduced range, are there known adverse impacts to aquaculture?                                                                                        | Yes      | CABI, 2021. <i>Hemiculter leucisculus</i> (common sawbelly). <a href="https://www.cabi.org/isc/datasheet/110574">https://www.cabi.org/isc/datasheet/110574</a> (accessed septembr 2021)                                                                                                                                                                                                                                                                                                     | Medium     |
| 12                                             | 3.04 | In the taxon's introduced range, are there known adverse impacts to ecosystem services?                                                                                 | Yes      | CABI, 2021. <i>Hemiculter leucisculus</i> (common sawbelly). <a href="https://www.cabi.org/isc/datasheet/110574">https://www.cabi.org/isc/datasheet/110574</a> (accessed septembr 2021)                                                                                                                                                                                                                                                                                                     | Low        |
| 13                                             | 3.05 | In the taxon's introduced range, are there known adverse socio-economic impacts?                                                                                        | Yes      | CABI, 2021. <i>Hemiculter leucisculus</i> (common sawbelly). <a href="https://www.cabi.org/isc/datasheet/110574">https://www.cabi.org/isc/datasheet/110574</a> (accessed septembr 2021)                                                                                                                                                                                                                                                                                                     | Low        |
| B. Biology/Ecology                             |      |                                                                                                                                                                         |          |                                                                                                                                                                                                                                                                                                                                                                                                                                                                                             |            |
| 4. Undesirable (or persistence) traits         |      |                                                                                                                                                                         |          |                                                                                                                                                                                                                                                                                                                                                                                                                                                                                             |            |
| 14                                             | 4.01 | Is it likely that the taxon will be poisonous or pose other risks to human health?                                                                                      | Yes      | Sattari, M., Mokhayer, B., Khara, H., Nezami, S., & Shafii, S. (2007). Occurrence and intensity of parasites in some bonyfish species of Anzali wetland from the southwest of the Caspian Sea. <i>Bulletin of the European Association of Fish Pathologists</i> , 27(2),                                                                                                                                                                                                                    | High       |
| 15                                             | 4.02 | Is it likely that the taxon will smother one or more native taxa (that are not threatened or protected)?                                                                | Yes      | Rosenthal, H., 1976. Implications of transplantations to aquaculture and ecosystems, in: <i>FAO Technical Conference on Aquaculture</i> . Kyoto, Japan, pp. 1–19.                                                                                                                                                                                                                                                                                                                           | High       |
| 16                                             | 4.03 | Are there any threatened or protected taxa that the non-native taxon would parasitise in the RA area?                                                                   | No       | Not a parasite species                                                                                                                                                                                                                                                                                                                                                                                                                                                                      | High       |
| 17                                             | 4.04 | Is the taxon adaptable in terms of climatic and other environmental conditions, thus enhancing its potential persistence if it has invaded or could invade the RA area? | Yes      | CABI, 2021. <i>Hemiculter leucisculus</i> (common sawbelly). <a href="https://www.cabi.org/isc/datasheet/110574">https://www.cabi.org/isc/datasheet/110574</a> (accessed septembr 2021)                                                                                                                                                                                                                                                                                                     | High       |
| 18                                             | 4.05 | Is the taxon likely to disrupt food-web structure/function in aquatic ecosystems if it has invaded or is likely to invade the RA                                        | Yes      | CABI, 2021. <i>Hemiculter leucisculus</i> (common sawbelly). <a href="https://www.cabi.org/isc/datasheet/110574">https://www.cabi.org/isc/datasheet/110574</a> (accessed septembr 2021)                                                                                                                                                                                                                                                                                                     | Medium     |

|                                 |      |                                                                                                                                                                    |     |                                                                                                                                                                                                                                                                          |           |
|---------------------------------|------|--------------------------------------------------------------------------------------------------------------------------------------------------------------------|-----|--------------------------------------------------------------------------------------------------------------------------------------------------------------------------------------------------------------------------------------------------------------------------|-----------|
| 19                              | 4.06 | Is the taxon likely to exert adverse impacts on ecosystem services in the RA area?                                                                                 | Yes | CABI, 2021. <i>Hemiculter leucisculus</i> (common sawbelly). <a href="https://www.cabi.org/isc/datasheet/110574">https://www.cabi.org/isc/datasheet/110574</a> (accessed septemebr 2021)                                                                                 | Medium    |
| 20                              | 4.07 | Is it likely that the taxon will host, and/or act as a vector for, recognised pests and infectious agents that are endemic in the RA                               | No  | Not known and not expected                                                                                                                                                                                                                                               | Low       |
| 21                              | 4.08 | Is it likely that the taxon will host, and/or act as a vector for, recognised pests and infectious agents that are absent from (novel to) the RA area?             | Yes | Sattari, M., Mokhayer, B., Khara, H., Nezami, S., & Shafii, S. (2007). Occurrence and intensity of parasites in some bonyfish species of Anzali wetland from the southwest of the Caspian Sea. <i>Bulletin of the European Association of Fish Pathologists</i> , 27(2), | Very high |
| 22                              | 4.09 | Is it likely that the taxon will achieve a body size that will make it more likely to be released from captivity?                                                  | No  | Since no species is kept in captivity this is not expected                                                                                                                                                                                                               | Very high |
| 23                              | 4.10 | Is the taxon capable of sustaining itself in a range of water velocity conditions (e.g. versatile in habitat use)?                                                 | Yes | Usually is living in stagnant waters although have been frequently reported from flowing waters                                                                                                                                                                          | High      |
| 24                              | 4.11 | Is it likely that the taxon's mode of existence (e.g. excretion of by-products) or behaviours (e.g. feeding) will reduce habitat quality for native taxa?          | Yes | Sattari, M., Mokhayer, B., Khara, H., Nezami, S., & Shafii, S. (2007). Occurrence and intensity of parasites in some bonyfish species of Anzali wetland from the southwest of the Caspian Sea. <i>Bulletin of the European Association of Fish Pathologists</i> , 27(2), | High      |
| 25                              | 4.12 | Is the taxon likely to maintain a viable population even when present in low densities (or persisting in adverse conditions by way of a dormant form)?             | Yes | Usually population develops from a small batch of individuals in an invaded areas                                                                                                                                                                                        | Medium    |
| <b>5. Resource exploitation</b> |      |                                                                                                                                                                    |     |                                                                                                                                                                                                                                                                          |           |
| 26                              | 5.01 | Is the taxon likely to consume threatened or protected native taxa in the RA area?                                                                                 | Yes | CABI, 2021. <i>Hemiculter leucisculus</i> (common sawbelly). <a href="https://www.cabi.org/isc/datasheet/110574">https://www.cabi.org/isc/datasheet/110574</a> (accessed septemebr 2021)                                                                                 | Medium    |
| 27                              | 5.02 | Is the taxon likely to sequester food resources (including nutrients) to the detriment of native taxa in the RA area?                                              | Yes | CABI, 2021. <i>Hemiculter leucisculus</i> (common sawbelly). <a href="https://www.cabi.org/isc/datasheet/110574">https://www.cabi.org/isc/datasheet/110574</a> (accessed septemebr 2021)                                                                                 | Very high |
| <b>6. Reproduction</b>          |      |                                                                                                                                                                    |     |                                                                                                                                                                                                                                                                          |           |
| 28                              | 6.01 | Is the taxon likely to exhibit parental care and/or to reduce age-at-maturity in response to environmental conditions?                                             | No  | Not well documented                                                                                                                                                                                                                                                      | Low       |
| 29                              | 6.02 | Is the taxon likely to produce viable gametes or propagules (in the RA area)?                                                                                      | Yes | N.J. Mustafayev, S.R. Ibrahimov, B.A. Levin Korean sharpbelly <i>Hemiculter leucisculus</i> (Basilevsky, 1855) (Cypriniformes, Cyprinidae) is a new species of Azerbaijan fauna Russ. J. Biol. Invasions., 6 (2015), pp. 252-259, 10.1134/S2075111715040049              | Very high |
| 30                              | 6.03 | Is the taxon likely to hybridise naturally with native taxa?                                                                                                       | No  | Not documented evidence and not expected                                                                                                                                                                                                                                 | Very high |
| 31                              | 6.04 | Is the taxon likely to be hermaphroditic or to display asexual reproduction?                                                                                       | No  | Species is typically sexually reproducing                                                                                                                                                                                                                                | High      |
| 32                              | 6.05 | Is the taxon dependent on the presence of another taxon (or specific habitat features) to complete its life cycle?                                                 | No  | Can complete life cycle independently                                                                                                                                                                                                                                    | Very high |
| 33                              | 6.06 | Is the taxon known (or likely) to produce a large number of propagules or offspring within a short time span (e.g. < 1 year)?                                      | Yes | Hundreds of thousands of eggs a year                                                                                                                                                                                                                                     | Very high |
| 34                              | 6.07 | How many time units (days, months, years) does the taxon require to reach the age-at-first-reproduction?                                                           | 1   | Years                                                                                                                                                                                                                                                                    | High      |
| <b>7. Dispersal mechanisms</b>  |      |                                                                                                                                                                    |     |                                                                                                                                                                                                                                                                          |           |
| 35                              | 7.01 | How many potential internal vectors/pathways could the taxon use to disperse within the RA area (with suitable                                                     | >1  | Natural dispersal and as a hitchhiker pest                                                                                                                                                                                                                               | Very high |
| 36                              | 7.02 | Will any of these vectors/pathways bring the taxon in close proximity to one or more protected areas (e.g. MCZ, MPA, SSSI)?                                        | Yes | Due to large number of propagules with active swimming abilities and with the help of water current                                                                                                                                                                      | High      |
| 37                              | 7.03 | Does the taxon have a means of actively attaching itself to hard substrata (e.g. ship hulls, pilings, buoys) such that it enhances the likelihood of dispersal?    | No  | No such fact have ever been detected. Biology also does not support such behavior                                                                                                                                                                                        | Very high |
| 38                              | 7.04 | Is natural dispersal of the taxon likely to occur as eggs (for animals) or as propagules (for plants: seeds, spores) in the RA area?                               | No  | No documented evidence exists                                                                                                                                                                                                                                            | Low       |
| 39                              | 7.05 | Is natural dispersal of the taxon likely to occur as larvae/juveniles (for animals) or as fragments/seedlings (for plants) in the RA area?                         | Yes | Not a documented evidence exists, though expected                                                                                                                                                                                                                        | High      |
| 40                              | 7.06 | Are older life stages of the taxon likely to migrate in the RA area for reproduction?                                                                              | No  | Dispersal is not depends on the density - no such fact is known                                                                                                                                                                                                          | High      |
| 41                              | 7.07 | Are propagules or eggs of the taxon likely to be dispersed in the RA area by other animals?                                                                        | No  | No such an evidence exists                                                                                                                                                                                                                                               | High      |
| 42                              | 7.08 | Is dispersal of the taxon along any of the vectors/pathways mentioned in the previous seven questions (35–41; i.e. both unintentional or intentional) likely to be | Yes | Due to a large number of juveniles produced by an individual                                                                                                                                                                                                             | High      |
| 43                              | 7.09 | Is dispersal of the taxon density dependent?                                                                                                                       | No  | No documented evidence exists                                                                                                                                                                                                                                            | Low       |
| <b>8. Tolerance attributes</b>  |      |                                                                                                                                                                    |     |                                                                                                                                                                                                                                                                          |           |
| 44                              | 8.01 | Is the taxon able to withstand being out of water for extended periods (e.g. minimum of one or more hours) at some stage of its life cycle?                        | No  | No documented evidence exists                                                                                                                                                                                                                                            | Medium    |

|                          |      |                                                                                                                                                                              |           |                                                                                                                                                                                                                                                       |           |
|--------------------------|------|------------------------------------------------------------------------------------------------------------------------------------------------------------------------------|-----------|-------------------------------------------------------------------------------------------------------------------------------------------------------------------------------------------------------------------------------------------------------|-----------|
| 45                       | 8.02 | Is the taxon tolerant of a wide range of water quality conditions relevant to that taxon? [In the Justification field, indicate the relevant water quality variable(s) being | Yes       | It is tolerant to various pollution source, temperature etc. CABI, 2021. <i>Hemiculter leucisculus</i> (common sawbelly). <a href="https://www.cabi.org/isc/datasheet/110574">https://www.cabi.org/isc/datasheet/110574</a> (accessed septemebr 2021) | Very high |
| 46                       | 8.03 | Can the taxon be controlled or eradicated in the wild with chemical, biological, or other agents/means?                                                                      | No        | No documented evidence exists                                                                                                                                                                                                                         | Very high |
| 47                       | 8.04 | Is the taxon likely to tolerate or benefit from environmental/human disturbance?                                                                                             | No        | No documented evidence exists                                                                                                                                                                                                                         | Medium    |
| 48                       | 8.05 | Is the taxon able to tolerate salinity levels that are higher or lower than those found in its usual environment?                                                            | No        | No documented evidence exists                                                                                                                                                                                                                         | Medium    |
| 49                       | 8.06 | Are there effective natural enemies (predators) of the taxon present in the RA                                                                                               | No        | No effective predator is known from the RA area. Based on professional judgement                                                                                                                                                                      | Medium    |
| <b>C. Climate change</b> |      |                                                                                                                                                                              |           |                                                                                                                                                                                                                                                       |           |
| <b>9. Climate change</b> |      |                                                                                                                                                                              |           |                                                                                                                                                                                                                                                       |           |
| 50                       | 9.01 | Under the predicted future climatic conditions, are the risks of entry into the RA area posed by the taxon likely to increase, decrease or not change?                       | No change | Based on professional judgement                                                                                                                                                                                                                       | Medium    |
| 51                       | 9.02 | Under the predicted future climatic conditions, are the risks of establishment posed by the taxon likely to increase, decrease or not change?                                | Increase  | Based on professional judgement                                                                                                                                                                                                                       | Medium    |
| 52                       | 9.03 | Under the predicted future climatic conditions, are the risks of dispersal within the RA area posed by the taxon likely to increase, decrease or not change?                 | Increase  | Based on professional judgement                                                                                                                                                                                                                       | High      |
| 53                       | 9.04 | Under the predicted future climatic conditions, what is the likely magnitude of future potential impacts on biodiversity and/or ecological integrity/status?                 | Higher    | Based on professional judgement                                                                                                                                                                                                                       | Medium    |
| 54                       | 9.05 | Under the predicted future climatic conditions, what is the likely magnitude of future potential impacts on ecosystem structure and/or function?                             | Higher    | Based on professional judgement                                                                                                                                                                                                                       | Medium    |
| 55                       | 9.06 | Under the predicted future climatic conditions, what is the likely magnitude of future potential impacts on ecosystem services/socio-economic factors?                       | Higher    | Based on professional judgement                                                                                                                                                                                                                       | Medium    |

| Statistics                                     |             |
|------------------------------------------------|-------------|
| Scores                                         |             |
| <b>BRA</b>                                     | <b>35.0</b> |
| <b>BRA Outcome</b>                             | <b>-</b>    |
| <b>BRA+CCA</b>                                 | <b>45.0</b> |
| <b>BRA+CCA Outcome</b>                         | <b>-</b>    |
| Score partition                                |             |
| <b>A. Biogeography/Historical</b>              | <b>17.0</b> |
| 1. Domestication/Cultivation                   | -2.0        |
| 2. Climate, distribution and introduction risk | 1.0         |
| 3. Invasive elsewhere                          | 18.0        |
| <b>B. Biology/Ecology</b>                      | <b>18.0</b> |
| 4. Undesirable (or persistence) traits         | 9.0         |
| 5. Resource exploitation                       | 7.0         |
| 6. Reproduction                                | 2.0         |
| 7. Dispersal mechanisms                        | 0.0         |
| 8. Tolerance attributes                        | 0.0         |
| <b>C. Climate change</b>                       | <b>10.0</b> |
| 9. Climate change                              | 10.0        |
| Answered Questions                             |             |
| <b>Total</b>                                   | <b>55</b>   |
| <b>A. Biogeography/Historical</b>              | <b>13</b>   |
| 1. Domestication/Cultivation                   | 3           |
| 2. Climate, distribution and introduction risk | 5           |
| 3. Invasive elsewhere                          | 5           |
| <b>B. Biology/Ecology</b>                      | <b>36</b>   |
| 4. Undesirable (or persistence) traits         | 12          |
| 5. Resource exploitation                       | 2           |
| 6. Reproduction                                | 7           |
| 7. Dispersal mechanisms                        | 9           |
| 8. Tolerance attributes                        | 6           |
| <b>C. Climate change</b>                       | <b>6</b>    |
| 9. Climate change                              | 6           |
| Sectors affected                               |             |
| <b>Commercial</b>                              | <b>16</b>   |
| <b>Environmental</b>                           | <b>17</b>   |
| <b>Species or population nuisance traits</b>   | <b>16</b>   |

| Thresholds     |             |
|----------------|-------------|
| <b>BRA</b>     | <b>-</b>    |
| <b>BRA+CCA</b> | <b>-</b>    |
| Confidence     |             |
| <b>BRA+CCA</b> | <b>0.70</b> |
| <b>BRA</b>     | <b>0.72</b> |

|     |      |
|-----|------|
| CCA | 0.54 |
|-----|------|

|                     |
|---------------------|
| Date and Time       |
| 16/05/2022 12:49:39 |

## AS-ISK v2

| Taxon and Assessor details         |                                                                                                             |
|------------------------------------|-------------------------------------------------------------------------------------------------------------|
| Category                           | Fishes and Lampreys (freshwater)                                                                            |
| Taxon name                         | <i>Hemiculter leucisculus</i>                                                                               |
| Common name                        | sharpbelly                                                                                                  |
| Assessor                           | Giorgi Epitashvili                                                                                          |
| Risk screening context             |                                                                                                             |
| Reason and socio-economic benefits | Hemiculter leucisculus, an invasive species, has expanded its range throughout much of Asia and             |
| Risk assessment area               | South Caucasus                                                                                              |
| Taxonomy                           | Hemiculter leucisculus (Basilevsky, 1855)                                                                   |
| Native range                       | The native range of <i>H. leucisculus</i> is East Asia: from Far East Russia and Mongolia in the north,     |
| Introduced range                   | <i>H. leucisculus</i> was unintentionally introduced into the Aral Sea Basin, Central Asia. It is currently |
| URL                                | <a href="https://www.fishbase.se/summary/4755">https://www.fishbase.se/summary/4755</a>                     |

|                                                |      | Response                                                                                                                                                         | Justification (references and/or other information) | Confidence                                                                                                                                                                                                                                                                                                                                                                                                                                                                                                                                                                                                                                                            |           |
|------------------------------------------------|------|------------------------------------------------------------------------------------------------------------------------------------------------------------------|-----------------------------------------------------|-----------------------------------------------------------------------------------------------------------------------------------------------------------------------------------------------------------------------------------------------------------------------------------------------------------------------------------------------------------------------------------------------------------------------------------------------------------------------------------------------------------------------------------------------------------------------------------------------------------------------------------------------------------------------|-----------|
| A. Biogeography/Historical                     |      |                                                                                                                                                                  |                                                     |                                                                                                                                                                                                                                                                                                                                                                                                                                                                                                                                                                                                                                                                       |           |
| 1. Domestication/Cultivation                   |      |                                                                                                                                                                  |                                                     |                                                                                                                                                                                                                                                                                                                                                                                                                                                                                                                                                                                                                                                                       |           |
| 1                                              | 1.01 | Has the taxon been the subject of domestication (or cultivation) for at least 20 generations?                                                                    | No                                                  | The species is common in large streams and reservoirs in Hong Kong but not favored as a table fish because the flesh is unpalatable and very bony. Therefore, <i>H. leuciscus</i> has not                                                                                                                                                                                                                                                                                                                                                                                                                                                                             | High      |
| 2                                              | 1.02 | Is the taxon harvested in the wild and likely to be sold or used in its live form?                                                                               | No                                                  | The species is common in large streams and reservoirs in Hong Kong but not favored as a table fish because the flesh is unpalatable and very bony (fishbase.org).                                                                                                                                                                                                                                                                                                                                                                                                                                                                                                     | Medium    |
| 3                                              | 1.03 | Does the taxon have invasive races, varieties, sub-taxa or congeners?                                                                                            | Yes                                                 | <i>H. leuciscus</i> as an invasive species has become established in several countries, including Iran, Afghanistan, and the former Soviet Union, where it has displaced local species.                                                                                                                                                                                                                                                                                                                                                                                                                                                                               | Very high |
| 2. Climate, distribution and introduction risk |      |                                                                                                                                                                  |                                                     |                                                                                                                                                                                                                                                                                                                                                                                                                                                                                                                                                                                                                                                                       |           |
| 4                                              | 2.01 | How similar are the climatic conditions of the Risk Assessment (RA) area and the taxon's native range?                                                           | Medium                                              | World Map of the Köppen-Geiger climate classification                                                                                                                                                                                                                                                                                                                                                                                                                                                                                                                                                                                                                 | Medium    |
| 5                                              | 2.02 | What is the quality of the climate matching data?                                                                                                                | Medium                                              | World Map of the Köppen-Geiger climate classification                                                                                                                                                                                                                                                                                                                                                                                                                                                                                                                                                                                                                 | Medium    |
| 6                                              | 2.03 | Is the taxon already present outside of captivity in the RA area?                                                                                                | Yes                                                 | <i>Hemiculter leuciscus</i> is fast expanding its range into the southern Caspian Sea basin in Iran (Zareian, Esmaeili, Zamanian Nejad, & Vatandoust, 2015) and was recently recorded from Azerbaijan by Mustafayev, Ibrahimov, and Levin (2015). This species is also found in the Alazani River, Georgia by G.                                                                                                                                                                                                                                                                                                                                                      | Very high |
| 7                                              | 2.04 | How many potential vectors could the taxon use to enter in the RA area?                                                                                          | > 1                                                 | This species may be spread by humans accidentally and also it can grow its range by itself (this fish found in the Alazani river which means that it came from Mingachevir Reservoir). Nowadays, Korean sharpbelly <i>H. leuciscus</i> is a common naturalized species that is widely distributed throughout Azerbaijan. Probably, it penetrated into freshwaters of Azerbaijan from the water bodies of neighboring countries, where this species was detected previously as an invasive one, or it settled here owing to the accidental appearance during the introduction of other species of water organisms to Azerbaijan (Mustafayev et al.                     | Very high |
| 8                                              | 2.05 | Is the taxon currently found in close proximity to, and likely to enter into, the RA area in the near future (e.g. unintentional and intentional introductions)? | Yes                                                 | <i>H. leuciscus</i> was first reported from Central Asia in the Amu Darya Basin in 1958, and in the Syr Darya Basin in 1961. In Iran, it was first found in the Anzali Lagoon (Holcik and Razavi, 1992) where it was probably introduced with Asian carp in 1967.                                                                                                                                                                                                                                                                                                                                                                                                     | Very high |
| 3. Invasive elsewhere                          |      |                                                                                                                                                                  |                                                     |                                                                                                                                                                                                                                                                                                                                                                                                                                                                                                                                                                                                                                                                       |           |
| 9                                              | 3.01 | Has the taxon become naturalised (established viable populations) outside its native range?                                                                      | Yes                                                 | <i>H. leuciscus</i> is a common naturalized species that is widely distributed throughout Azerbaijan (Mustafayev et al. 2015). <i>H. leuciscus</i> was unintentionally introduced into the Aral Sea Basin, Central Asia. It is currently widespread in the plains of the region up to foothills, and in the drainages of the Amu Darya, Syr Darya, Zarafshan, Qashqadarya, and Tedzhen rivers. In Iran it was reported from the Caspian Sea (Safid River, Aras River, Golestan Province) and Tigris basins. It is thought to be widespread in Iran, although this may be the native fish the Danube bleak ( <i>Chalcalburnus chalcoides</i> ), which is very similar. | Very high |
| 10                                             | 3.02 | In the taxon's introduced range, are there known adverse impacts to wild stocks or commercial taxa?                                                              | Yes                                                 | It has become established as an exotic species in several countries, including Iran, Afghanistan, and the former Soviet Union, where it has displaced local species.                                                                                                                                                                                                                                                                                                                                                                                                                                                                                                  | Very high |
| 11                                             | 3.03 | In the taxon's introduced range, are there known adverse impacts to aquaculture?                                                                                 | Yes                                                 | <i>H. leuciscus</i> is considered as a pest in fish farms where it competes with juveniles of commercial species.                                                                                                                                                                                                                                                                                                                                                                                                                                                                                                                                                     | Very high |
| 12                                             | 3.04 | In the taxon's introduced range, are there known adverse impacts to ecosystem                                                                                    | No                                                  | Data deficient                                                                                                                                                                                                                                                                                                                                                                                                                                                                                                                                                                                                                                                        | Low       |
| 13                                             | 3.05 | In the taxon's introduced range, are there known adverse socio-economic impacts?                                                                                 | No                                                  | Data deficient                                                                                                                                                                                                                                                                                                                                                                                                                                                                                                                                                                                                                                                        | Low       |
| B. Biology/Ecology                             |      |                                                                                                                                                                  |                                                     |                                                                                                                                                                                                                                                                                                                                                                                                                                                                                                                                                                                                                                                                       |           |
| 4. Undesirable (or persistence) traits         |      |                                                                                                                                                                  |                                                     |                                                                                                                                                                                                                                                                                                                                                                                                                                                                                                                                                                                                                                                                       |           |
| 14                                             | 4.01 | Is it likely that the taxon will be poisonous or pose other risks to human health?                                                                               | No                                                  | This species does not pose a threat to humans.                                                                                                                                                                                                                                                                                                                                                                                                                                                                                                                                                                                                                        | High      |
| 15                                             | 4.02 | Is it likely that the taxon will smother one or more native taxa (that are not threatened or protected)?                                                         | Yes                                                 | <i>H. leuciscus</i> has become established as an exotic species in several countries, including Iran, Afghanistan, and the former Soviet Union, where it has displaced local species.                                                                                                                                                                                                                                                                                                                                                                                                                                                                                 | Very high |
| 16                                             | 4.03 | Are there any threatened or protected taxa that the non-native taxon would parasitise in the RA area?                                                            | Yes                                                 | There are several protected and threatened species in the SC region which may have been affected by <i>H. leuciscus</i> e.g. <i>Salmo</i> spp, <i>Acipenser</i> spp, <i>Luciobarbus capito</i> , <i>L. mursa</i> , etc.                                                                                                                                                                                                                                                                                                                                                                                                                                               | Very high |

|                                 |      |                                                                                                                                                                         |                |                                                                                                                                                                                                                                                                                                                                 |           |
|---------------------------------|------|-------------------------------------------------------------------------------------------------------------------------------------------------------------------------|----------------|---------------------------------------------------------------------------------------------------------------------------------------------------------------------------------------------------------------------------------------------------------------------------------------------------------------------------------|-----------|
| 17                              | 4.04 | Is the taxon adaptable in terms of climatic and other environmental conditions, thus enhancing its potential persistence if it has invaded or could invade the RA area? | Yes            | H. leucisculus has been successfully established in Azerbaijan which means that climatic conditions in the SC region is acceptable for this species.                                                                                                                                                                            | Very high |
| 18                              | 4.05 | Is the taxon likely to disrupt food-web structure/function in aquatic ecosystems if it has invaded or is likely to invade the RA area?                                  | Yes            | The probability of this is very high because this species is a predator.                                                                                                                                                                                                                                                        | Very high |
| 19                              | 4.06 | Is the taxon likely to exert adverse impacts on ecosystem services in the RA area?                                                                                      | Yes            | There is a probability of that.                                                                                                                                                                                                                                                                                                 | High      |
| 20                              | 4.07 | Is it likely that the taxon will host, and/or act as a vector for, recognised pests and infectious agents that are endemic in the RA area?                              | Not applicable | Data deficient                                                                                                                                                                                                                                                                                                                  | Low       |
| 21                              | 4.08 | Is it likely that the taxon will host, and/or act as a vector for, recognised pests and infectious agents that are absent from (novel to) the RA area?                  | Yes            | As most fish species, the sharpbelly harbours several species of parasites. One of them is Paradiplozoon hemiculteri, a monogenean living on the gills.                                                                                                                                                                         | Medium    |
| 22                              | 4.09 | Is it likely that the taxon will achieve a body size that will make it more likely to be released from captivity?                                                       | Yes            | Max length of H. leucisculus is 23.0 cm, therefore this species can be kept in an aquarium or pond and then released into the wild.                                                                                                                                                                                             | Medium    |
| 23                              | 4.10 | Is the taxon capable of sustaining itself in a range of water velocity conditions (e.g. versatile in habitat use)?                                                      | Yes            | H. leucisculus is found in rivers, lakes, reservoirs, canals, and marshes. It keeps to the water surface in stagnant waters.                                                                                                                                                                                                    | High      |
| 24                              | 4.11 | Is it likely that the taxon's mode of existence (e.g. excretion of by-products) or behaviours (e.g. feeding) will reduce habitat quality for native taxa?               | Yes            | H. leucisculus as an benthivorous fish may affect the water quality by inducing sediment disturbance and resuspension, resulting in reduced water transparency and increased nutrient release from the sediment (Yu et al. 2021).                                                                                               | Medium    |
| 25                              | 4.12 | Is the taxon likely to maintain a viable population even when present in low densities (or persisting in adverse conditions by way of a dormant form)?                  | Yes            | Data deficient                                                                                                                                                                                                                                                                                                                  | Low       |
| <b>5. Resource exploitation</b> |      |                                                                                                                                                                         |                |                                                                                                                                                                                                                                                                                                                                 |           |
| 26                              | 5.01 | Is the taxon likely to consume threatened or protected native taxa in the RA area?                                                                                      | Yes            | The probability of this is high but there is no evidence yet                                                                                                                                                                                                                                                                    | Medium    |
| 27                              | 5.02 | Is the taxon likely to sequester food resources (including nutrients) to the detriment of native taxa in the RA area?                                                   | Yes            | The probability of this is high but there is no evidence yet                                                                                                                                                                                                                                                                    | Medium    |
| <b>6. Reproduction</b>          |      |                                                                                                                                                                         |                |                                                                                                                                                                                                                                                                                                                                 |           |
| 28                              | 6.01 | Is the taxon likely to exhibit parental care and/or to reduce age-at-maturity in response to environmental conditions?                                                  | Not applicable | Data deficient                                                                                                                                                                                                                                                                                                                  | Medium    |
| 29                              | 6.02 | Is the taxon likely to produce viable gametes or propagules (in the RA area)?                                                                                           | Yes            | H. leucisculus is a common naturalized species that is widely distributed throughout Azerbaijan (Mustafayev et al. 2015).                                                                                                                                                                                                       | Very high |
| 30                              | 6.03 | Is the taxon likely to hybridise naturally with native taxa?                                                                                                            | No             | Data deficient                                                                                                                                                                                                                                                                                                                  | Low       |
| 31                              | 6.04 | Is the taxon likely to be hermaphroditic or to display asexual reproduction?                                                                                            | No             | Data deficient                                                                                                                                                                                                                                                                                                                  | Low       |
| 32                              | 6.05 | Is the taxon dependent on the presence of another taxon (or specific habitat features) to complete its life cycle?                                                      | No             | No such fact has been described.                                                                                                                                                                                                                                                                                                | Medium    |
| 33                              | 6.06 | Is the taxon known (or likely) to produce a large number of propagules or offspring within a short time span (e.g. < 1 year)?                                           | Yes            | The average fecundities of H. leucisculus is about 19978.6 eggs (Mousavi-Sabet et al. 2019).                                                                                                                                                                                                                                    | High      |
| 34                              | 6.07 | How many time units (days, months, years) does the taxon require to reach the age-at-first-reproduction?                                                                | 1              | (Mousavi-Sabet et al. 2019)                                                                                                                                                                                                                                                                                                     | Very high |
| <b>7. Dispersal mechanisms</b>  |      |                                                                                                                                                                         |                |                                                                                                                                                                                                                                                                                                                                 |           |
| 35                              | 7.01 | How many potential internal vectors/pathways could the taxon use to disperse within the RA area (with suitable habitats nearby)?                                        | > 1            | Probably, it penetrated into freshwaters of Azerbaijan from the water bodies of neighboring countries, where this species was detected previously as an invasive one, or it settled here owing to the accidental appearance during the introduction of other species of water organisms to Azerbaijan (Mustafayev et al. 2015). | Very high |
| 36                              | 7.02 | Will any of these vectors/pathways bring the taxon in close proximity to one or more protected areas (e.g. MCZ, MPA, SSSI)?                                             | Yes            | The probability of this is high but there is no evidence yet                                                                                                                                                                                                                                                                    | High      |
| 37                              | 7.03 | Does the taxon have a means of actively attaching itself to hard substrata (e.g. ship hulls, pilings, buoys) such that it enhances the likelihood of dispersal?         | No             | This species does not have similar means                                                                                                                                                                                                                                                                                        | High      |
| 38                              | 7.04 | Is natural dispersal of the taxon likely to occur as eggs (for animals) or as propagules (for plants: seeds, spores) in the RA area?                                    | Yes            | H. leucisculus is a common naturalized species that is widely distributed throughout Azerbaijan (Mustafayev et al. 2015). It seems that this species is naturally reproduces in the SC region.                                                                                                                                  | Very high |
| 39                              | 7.05 | Is natural dispersal of the taxon likely to occur as larvae/juveniles (for animals) or as fragments/seedlings (for plants) in the RA area?                              | Yes            | H. leucisculus is a common naturalized species that is widely distributed throughout Azerbaijan (Mustafayev et al. 2015). It seems that this species is naturally reproduces in the SC region.                                                                                                                                  | Very high |
| 40                              | 7.06 | Are older life stages of the taxon likely to migrate in the RA area for reproduction?                                                                                   | Yes            | H. leucisculus is a common naturalized species that is widely distributed throughout Azerbaijan (Mustafayev et al. 2015). It seems that this species is regularly migrates within the water bodies of the SC region for reproduction.                                                                                           | Very high |
| 41                              | 7.07 | Are propagules or eggs of the taxon likely to be dispersed in the RA area by other animals?                                                                             | Yes            | There is a possibility of this but we have no evidence yet                                                                                                                                                                                                                                                                      | Medium    |
| 42                              | 7.08 | Is dispersal of the taxon along any of the vectors/pathways mentioned in the previous seven questions (35–41; i.e. both unintentional or intentional) likely to be      | Yes            | Own judgement                                                                                                                                                                                                                                                                                                                   | Medium    |

|                                |      |                                                                                                                                                                              |                |                                                                                                                                                                                                                                                                                                                                              |           |
|--------------------------------|------|------------------------------------------------------------------------------------------------------------------------------------------------------------------------------|----------------|----------------------------------------------------------------------------------------------------------------------------------------------------------------------------------------------------------------------------------------------------------------------------------------------------------------------------------------------|-----------|
| 43                             | 7.09 | Is dispersal of the taxon density dependent?                                                                                                                                 | Not applicable | Data deficient                                                                                                                                                                                                                                                                                                                               | Low       |
| <b>8. Tolerance attributes</b> |      |                                                                                                                                                                              |                |                                                                                                                                                                                                                                                                                                                                              |           |
| 44                             | 8.01 | Is the taxon able to withstand being out of water for extended periods (e.g. minimum of one or more hours) at some stage of its life cycle?                                  | No             | No such fact has been recorded                                                                                                                                                                                                                                                                                                               | Very high |
| 45                             | 8.02 | Is the taxon tolerant of a wide range of water quality conditions relevant to that taxon? [In the Justification field, indicate the relevant water quality variable(s) being | Yes            | This species is highly tolerant of water pollution (Coad, 2014)                                                                                                                                                                                                                                                                              | Very high |
| 46                             | 8.03 | Can the taxon be controlled or eradicated in the wild with chemical, biological, or other agents/means?                                                                      | Yes            | The average biomass of unwanted fishes like <i>Carassius auratus</i> , <i>Hemiculter leucisculus</i> , <i>Alburnus alburnus</i> and <i>Pseudoras bora parva</i> of the first and second treatments in comparison to control showed a reduction of 94, 88.9, 62.4 and 56.82 percent, respectively by <i>Esox lucius</i> (Khaval et al. 2010). | Very high |
| 47                             | 8.04 | Is the taxon likely to tolerate or benefit from environmental/human disturbance?                                                                                             | Yes            | This species has been spread by humans in many countries.                                                                                                                                                                                                                                                                                    | Very high |
| 48                             | 8.05 | Is the taxon able to tolerate salinity levels that are higher or lower than those found in its usual environment?                                                            | No             | Data deficient                                                                                                                                                                                                                                                                                                                               | Low       |
| 49                             | 8.06 | Are there effective natural enemies (predators) of the taxon present in the RA area?                                                                                         | Yes            | There is several predators which can controll the populations of <i>H. leucisculus</i> , e.g.: <i>Esox lucius</i> , <i>Silurus glanis</i> , <i>Salmo</i> spp, <i>Squalius</i> spp, etc.                                                                                                                                                      | Very high |
| <b>C. Climate change</b>       |      |                                                                                                                                                                              |                |                                                                                                                                                                                                                                                                                                                                              |           |
| <b>9. Climate change</b>       |      |                                                                                                                                                                              |                |                                                                                                                                                                                                                                                                                                                                              |           |
| 50                             | 9.01 | Under the predicted future climatic conditions, are the risks of entry into the RA area posed by the taxon likely to increase, decrease or not change?                       | Increase       | Own judgement                                                                                                                                                                                                                                                                                                                                | Medium    |
| 51                             | 9.02 | Under the predicted future climatic conditions, are the risks of establishment posed by the taxon likely to increase, decrease or not change?                                | Increase       | Own judgement                                                                                                                                                                                                                                                                                                                                | Medium    |
| 52                             | 9.03 | Under the predicted future climatic conditions, are the risks of dispersal within the RA area posed by the taxon likely to increase, decrease or not change?                 | Increase       | Own judgement                                                                                                                                                                                                                                                                                                                                | Medium    |
| 53                             | 9.04 | Under the predicted future climatic conditions, what is the likely magnitude of future potential impacts on biodiversity and/or ecological integrity/status?                 | Higher         | Own judgement                                                                                                                                                                                                                                                                                                                                | Medium    |
| 54                             | 9.05 | Under the predicted future climatic conditions, what is the likely magnitude of future potential impacts on ecosystem structure and/or function?                             | Higher         | Own judgement                                                                                                                                                                                                                                                                                                                                | Low       |
| 55                             | 9.06 | Under the predicted future climatic conditions, what is the likely magnitude of future potential impacts on ecosystem services/socio-economic factors?                       | No change      | Own judgement                                                                                                                                                                                                                                                                                                                                | Low       |

| Statistics                                     |             |
|------------------------------------------------|-------------|
| Scores                                         |             |
| <b>BRA</b>                                     | <b>34.5</b> |
| <b>BRA Outcome</b>                             | -           |
| <b>BRA+CCA</b>                                 | <b>44.5</b> |
| <b>BRA+CCA Outcome</b>                         | -           |
| Score partition                                |             |
| <b>A. Biogeography/Historical</b>              | <b>9.5</b>  |
| 1. Domestication/Cultivation                   | 0.0         |
| 2. Climate, distribution and introduction risk | 2.0         |
| 3. Invasive elsewhere                          | 7.5         |
| <b>B. Biology/Ecology</b>                      | <b>25.0</b> |
| 4. Undesirable (or persistence) traits         | 10.0        |
| 5. Resource exploitation                       | 7.0         |
| 6. Reproduction                                | 2.0         |
| 7. Dispersal mechanisms                        | 6.0         |
| 8. Tolerance attributes                        | 0.0         |
| <b>C. Climate change</b>                       | <b>10.0</b> |
| 9. Climate change                              | 10.0        |
| Answered Questions                             |             |
| <b>Total</b>                                   | <b>55</b>   |
| <b>A. Biogeography/Historical</b>              | <b>13</b>   |
| 1. Domestication/Cultivation                   | 3           |
| 2. Climate, distribution and introduction risk | 5           |
| 3. Invasive elsewhere                          | 5           |
| <b>B. Biology/Ecology</b>                      | <b>36</b>   |
| 4. Undesirable (or persistence) traits         | 12          |
| 5. Resource exploitation                       | 2           |
| 6. Reproduction                                | 7           |
| 7. Dispersal mechanisms                        | 9           |
| 8. Tolerance attributes                        | 6           |
| <b>C. Climate change</b>                       | <b>6</b>    |
| 9. Climate change                              | 6           |
| Sectors affected                               |             |
| <b>Commercial</b>                              | <b>9</b>    |

|                                              |           |
|----------------------------------------------|-----------|
| <b>Environmental</b>                         | <b>13</b> |
| <b>Species or population nuisance traits</b> | <b>28</b> |

|                   |                |             |
|-------------------|----------------|-------------|
| <b>Thresholds</b> |                |             |
|                   | <b>BRA</b>     | <b>-</b>    |
|                   | <b>BRA+CCA</b> | <b>-</b>    |
| <b>Confidence</b> |                |             |
|                   | <b>BRA+CCA</b> | <b>0.69</b> |
|                   | <b>BRA</b>     | <b>0.72</b> |
|                   | <b>CCA</b>     | <b>0.42</b> |

|                            |  |
|----------------------------|--|
| <b>Date and Time</b>       |  |
| <b>05/05/2022 19:37:04</b> |  |



## AS-ISK v2

| Taxon and Assessor details         |                                                                                             |
|------------------------------------|---------------------------------------------------------------------------------------------|
| Category                           | Fishes and Lampreys (freshwater)                                                            |
| Taxon name                         | <i>Hemiculter leucisculus</i>                                                               |
| Common name                        | sharpbelly                                                                                  |
| Assessor                           | Tatia Kuljanishvili                                                                         |
| Risk screening context             |                                                                                             |
| Reason and socio-economic benefits | The species appeared on the Iranian shores of the Caspian Sea in the 1990s as an accidental |
| Risk assessment area               | South Caucasus                                                                              |
| Taxonomy                           | Actinopteri (ray-finned fishes) > Cypriniformes (Carps) > Xenocypridae                      |
| Native range                       | Southeastern Asia and the Amur River basin                                                  |
| Introduced range                   | Armenia, Azerbaijan, Georgia                                                                |
| URL                                | <a href="https://www.fishbase.se/summary/4755">https://www.fishbase.se/summary/4755</a>     |

|                                                |      |                                                                                                                                                                         | Response | Justification (references and/or other information)                                                                                                                                                                                                                                                                                                                                                                                                                                                                                                                                                                                                                                                                     | Confidence |
|------------------------------------------------|------|-------------------------------------------------------------------------------------------------------------------------------------------------------------------------|----------|-------------------------------------------------------------------------------------------------------------------------------------------------------------------------------------------------------------------------------------------------------------------------------------------------------------------------------------------------------------------------------------------------------------------------------------------------------------------------------------------------------------------------------------------------------------------------------------------------------------------------------------------------------------------------------------------------------------------------|------------|
| A. Biogeography/Historical                     |      |                                                                                                                                                                         |          |                                                                                                                                                                                                                                                                                                                                                                                                                                                                                                                                                                                                                                                                                                                         |            |
| 1. Domestication/Cultivation                   |      |                                                                                                                                                                         |          |                                                                                                                                                                                                                                                                                                                                                                                                                                                                                                                                                                                                                                                                                                                         |            |
| 1                                              | 1.01 | Has the taxon been the subject of domestication (or cultivation) for at least 20 generations?                                                                           | No       | The taxon hasn't been subject of domestication                                                                                                                                                                                                                                                                                                                                                                                                                                                                                                                                                                                                                                                                          | Very high  |
| 2                                              | 1.02 | Is the taxon harvested in the wild and likely to be sold or used in its live form?                                                                                      | No       | The taxon is not harvested in the wild however it is often accidentally sold together with other aquaculture important fishes (Coad & Abdoli 1993)                                                                                                                                                                                                                                                                                                                                                                                                                                                                                                                                                                      | Medium     |
| 3                                              | 1.03 | Does the taxon have invasive races, varieties, sub-taxa or congeners?                                                                                                   | No       | The species doesn't have invasive races varietieshowever it is from the same family as most worldwide introduced Chinese carps                                                                                                                                                                                                                                                                                                                                                                                                                                                                                                                                                                                          | Medium     |
| 2. Climate, distribution and introduction risk |      |                                                                                                                                                                         |          |                                                                                                                                                                                                                                                                                                                                                                                                                                                                                                                                                                                                                                                                                                                         |            |
| 4                                              | 2.01 | How similar are the climatic conditions of the Risk Assessment (RA) area and the taxon's native range?                                                                  | High     | The climate is very similar                                                                                                                                                                                                                                                                                                                                                                                                                                                                                                                                                                                                                                                                                             | Very high  |
| 5                                              | 2.02 | What is the quality of the climate matching data?                                                                                                                       | High     | The quality of climate matching is high                                                                                                                                                                                                                                                                                                                                                                                                                                                                                                                                                                                                                                                                                 | Very high  |
| 6                                              | 2.03 | Is the taxon already present outside of captivity in the RA area?                                                                                                       | Yes      | It was recorded in Azerbaijan for the first time in 2012 (Mustafayev et al., 2015), but the exact time of its introduction and the vectors or pathways are still unknown. Most probably it entered from the neighboring areas, where it was already introduced (Mustafayev et al., 2015). <i>H. leuciscus</i> was also recently discovered in Armenia, in the Arpa River by (Pipoyan & Arakelyan, 2021). The first introduction date and pathway of this species' introduction in Armenia is unknown, but it probably penetrated from neighboring areas. The species is currently well established in the Caspian Sea basin and Kuljanishvili et al. (2020) and it is assumed that it will soon penetrate the Black Sea | Very high  |
| 7                                              | 2.04 | How many potential vectors could the taxon use to enter in the RA area?                                                                                                 | >1       | Aquaculture and self spread                                                                                                                                                                                                                                                                                                                                                                                                                                                                                                                                                                                                                                                                                             | Very high  |
| 8                                              | 2.05 | Is the taxon currently found in close proximity to, and likely to enter into, the RA area in the near future (e.g. unintentional and intentional introductions)?        | Yes      | This species is recorded from Azerbaijan Armenia and probably exist in Georgia                                                                                                                                                                                                                                                                                                                                                                                                                                                                                                                                                                                                                                          | Very high  |
| 3. Invasive elsewhere                          |      |                                                                                                                                                                         |          |                                                                                                                                                                                                                                                                                                                                                                                                                                                                                                                                                                                                                                                                                                                         |            |
| 9                                              | 3.01 | Has the taxon become naturalised (established viable populations) outside its                                                                                           | Yes      | Yes, for example in Iran and Iraq                                                                                                                                                                                                                                                                                                                                                                                                                                                                                                                                                                                                                                                                                       | Very high  |
| 10                                             | 3.02 | In the taxon's introduced range, are there known adverse impacts to wild stocks or commercial taxa?                                                                     | Yes      | It has not documented, however we might assume that since it is with competition of native alburnus species(Coad and Hussain 2013) it might have adverse impact on commercial taxa                                                                                                                                                                                                                                                                                                                                                                                                                                                                                                                                      | Medium     |
| 11                                             | 3.03 | In the taxon's introduced range, are there known adverse impacts to aquaculture?                                                                                        | Yes      | It has not been documented however we may assume that since this species feeds on fish eggs and young (Holčík and Razavi, 1992)can have adverse impact to aquaculture                                                                                                                                                                                                                                                                                                                                                                                                                                                                                                                                                   | Medium     |
| 12                                             | 3.04 | In the taxon's introduced range, are there known adverse impacts to ecosystem                                                                                           | Yes      | Can be transmitting diseases                                                                                                                                                                                                                                                                                                                                                                                                                                                                                                                                                                                                                                                                                            | Low        |
| 13                                             | 3.05 | In the taxon's introduced range, are there known adverse socio-economic impacts?                                                                                        | No       | There is no information                                                                                                                                                                                                                                                                                                                                                                                                                                                                                                                                                                                                                                                                                                 | Low        |
| B. Biology/Ecology                             |      |                                                                                                                                                                         |          |                                                                                                                                                                                                                                                                                                                                                                                                                                                                                                                                                                                                                                                                                                                         |            |
| 4. Undesirable (or persistence) traits         |      |                                                                                                                                                                         |          |                                                                                                                                                                                                                                                                                                                                                                                                                                                                                                                                                                                                                                                                                                                         |            |
| 14                                             | 4.01 | Is it likely that the taxon will be poisonous or pose other risks to human health?                                                                                      | No       | It is not poisonous                                                                                                                                                                                                                                                                                                                                                                                                                                                                                                                                                                                                                                                                                                     | Very high  |
| 15                                             | 4.02 | Is it likely that the taxon will smother one or more native taxa (that are not threatened or protected)?                                                                | Yes      | Since this species is known to grow more rapidly and have higher fecundity in introduced habitats than in native habitats (Esmaeili et al., 2010; Zareian et al., 2015) we may assume that this tax on can smother one or more native taxa                                                                                                                                                                                                                                                                                                                                                                                                                                                                              | High       |
| 16                                             | 4.03 | Are there any threatened or protected taxa that the non-native taxon would parasitise in the RA area?                                                                   | No       | Does not parasite                                                                                                                                                                                                                                                                                                                                                                                                                                                                                                                                                                                                                                                                                                       | Very high  |
| 17                                             | 4.04 | Is the taxon adaptable in terms of climatic and other environmental conditions, thus enhancing its potential persistence if it has invaded or could invade the RA area? | Yes      | This fish is very adaptive to variable and environmental conditions and this allows it to breed and established in areas outside their native range (Martin et al 2010).This fish can with stand heavily modified water conditions and is very tolerant to water pollution                                                                                                                                                                                                                                                                                                                                                                                                                                              | Very high  |
| 18                                             | 4.05 | Is the taxon likely to disrupt food-web structure/function in aquatic ecosystems if it has invaded or is likely to invade the RA                                        | Yes      | These fish has the ability to easily modify their food habit as the conditions change (Holčík and Razavi, 1992) therefore it can give us idea that this species actually can disrupt food web structure                                                                                                                                                                                                                                                                                                                                                                                                                                                                                                                 | High       |
| 19                                             | 4.06 | Is the taxon likely to exert adverse impacts on ecosystem services in the RA area?                                                                                      | Yes      | Can be transmitting diseases and can affect recreational fisheries                                                                                                                                                                                                                                                                                                                                                                                                                                                                                                                                                                                                                                                      | Medium     |
| 20                                             | 4.07 | Is it likely that the taxon will host, and/or act as a vector for, recognised pests and infectious agents that are endemic in the RA                                    | Yes      | Yes but there is no information about it                                                                                                                                                                                                                                                                                                                                                                                                                                                                                                                                                                                                                                                                                | Low        |

|                                 |      |                                                                                                                                                                              |     |                                                                                                                                                                                                                                                                                                        |           |
|---------------------------------|------|------------------------------------------------------------------------------------------------------------------------------------------------------------------------------|-----|--------------------------------------------------------------------------------------------------------------------------------------------------------------------------------------------------------------------------------------------------------------------------------------------------------|-----------|
| 21                              | 4.08 | Is it likely that the taxon will host, and/or act as a vector for, recognised pests and infectious agents that are absent from (novel to) the RA area?                       | Yes | It is possible                                                                                                                                                                                                                                                                                         | High      |
| 22                              | 4.09 | Is it likely that the taxon will achieve a body size that will make it more likely to be released from captivity?                                                            | No  | This fish can achieve maximum of 18 centimetres total length                                                                                                                                                                                                                                           | High      |
| 23                              | 4.10 | Is the taxon capable of sustaining itself in a range of water velocity conditions (e.g. versatile in habitat use)?                                                           | No  | This base inhabits large streams and reservoirs (Radkhah et al 2013) however it is not known if this species is capable of sustaining itself in a range of water velocity conditions                                                                                                                   | Low       |
| 24                              | 4.11 | Is it likely that the taxon's mode of existence (e.g. excretion of by-products) or behaviours (e.g. feeding) will reduce habitat quality for native taxa?                    | No  | No information available                                                                                                                                                                                                                                                                               | High      |
| 25                              | 4.12 | Is the taxon likely to maintain a viable population even when present in low densities (or persisting in adverse conditions by way of a dormant form)?                       | Yes | Yes. That is what contributed in its successful spread                                                                                                                                                                                                                                                 | Very high |
| <b>5. Resource exploitation</b> |      |                                                                                                                                                                              |     |                                                                                                                                                                                                                                                                                                        |           |
| 26                              | 5.01 | Is the taxon likely to consume threatened or protected native taxa in the RA area?                                                                                           | Yes | Yes. It is possible that this species will consume threatened or protected native taxa larvae or eggs                                                                                                                                                                                                  | Medium    |
| 27                              | 5.02 | Is the taxon likely to sequester food resources (including nutrients) to the detriment of native taxa in the RA area?                                                        | No  | No info                                                                                                                                                                                                                                                                                                | Medium    |
| <b>6. Reproduction</b>          |      |                                                                                                                                                                              |     |                                                                                                                                                                                                                                                                                                        |           |
| 28                              | 6.01 | Is the taxon likely to exhibit parental care and/or to reduce age-at-maturity in response to environmental conditions?                                                       | Yes | This fish has ability to have higher fecundity in a newly invaded environments (Esmaeili et al., 2010; Zareian et al., 2015). however it's does not exhibit parental care                                                                                                                              | Medium    |
| 29                              | 6.02 | Is the taxon likely to produce viable gametes or propagules (in the RA area)?                                                                                                | Yes | No information available                                                                                                                                                                                                                                                                               | Very high |
| 30                              | 6.03 | Is the taxon likely to hybridise naturally with native taxa?                                                                                                                 | No  | No information available                                                                                                                                                                                                                                                                               | High      |
| 31                              | 6.04 | Is the taxon likely to be hermaphroditic or to display asexual reproduction?                                                                                                 | No  | No. Does not display asexual reproduction                                                                                                                                                                                                                                                              | Very high |
| 32                              | 6.05 | Is the taxon dependent on the presence of another taxon (or specific habitat features) to complete its life cycle?                                                           | No  | No See: <a href="https://www.fishbase.se/summary/4755">https://www.fishbase.se/summary/4755</a>                                                                                                                                                                                                        | Very high |
| 33                              | 6.06 | Is the taxon known (or likely) to produce a large number of propagules or offspring within a short time span (e.g. < 1 year)?                                                | Yes | It can spawn 16 times during the season and the potential annual fecundity was something around 200,000 oocytes over the whole spawning season (Wang et al 2014). high annual fecundity is likely to be one of the factors of successful invasion of this fish in a new environment (Wang et al 2014). | Very high |
| 34                              | 6.07 | How many time units (days, months, years) does the taxon require to reach the age-at-first-reproduction?                                                                     | 1   | Maturity occurs over one year (Mousavi-Sabet et al 2019)                                                                                                                                                                                                                                               | Very high |
| <b>7. Dispersal mechanisms</b>  |      |                                                                                                                                                                              |     |                                                                                                                                                                                                                                                                                                        |           |
| 35                              | 7.01 | How many potential internal vectors/pathways could the taxon use to disperse within the RA area (with suitable protected areas (e.g. MCZ, MPA, SSSI)?                        | >1  | Aquaculture and self spread                                                                                                                                                                                                                                                                            | Very high |
| 36                              | 7.02 | Will any of these vectors/pathways bring the taxon in close proximity to one or more protected areas (e.g. MCZ, MPA, SSSI)?                                                  | Yes | Yes                                                                                                                                                                                                                                                                                                    | High      |
| 37                              | 7.03 | Does the taxon have a means of actively attaching itself to hard substrata (e.g. ship hulls, pilings, buoys) such that it enhances the likelihood of dispersal?              | No  | No. Morphologically this species does not have a means of actively attaching itself to hard substrata                                                                                                                                                                                                  | Very high |
| 38                              | 7.04 | Is natural dispersal of the taxon likely to occur as eggs (for animals) or as propagules (for plants: seeds, spores) in the RA area?                                         | No  | No. can not be distributed as eggs.                                                                                                                                                                                                                                                                    | Very high |
| 39                              | 7.05 | Is natural dispersal of the taxon likely to occur as larvae/juveniles (for animals) or as fragments/seedlings (for plants) in the RA area?                                   | Yes | Yes. It is possible                                                                                                                                                                                                                                                                                    | Medium    |
| 40                              | 7.06 | Are older life stages of the taxon likely to migrate in the RA area for reproduction?                                                                                        | No  | Does not migrate for reproduction                                                                                                                                                                                                                                                                      | High      |
| 41                              | 7.07 | Are propagules or eggs of the taxon likely to be dispersed in the RA area by other animals?                                                                                  | No  | No. Can not be dispersed by other animals                                                                                                                                                                                                                                                              | Very high |
| 42                              | 7.08 | Is dispersal of the taxon along any of the vectors/pathways mentioned in the previous seven questions (35–41; i.e. both unintentional or intentional) likely to be           | No  | We do not know about it                                                                                                                                                                                                                                                                                | Low       |
| 43                              | 7.09 | Is dispersal of the taxon density dependent?                                                                                                                                 | No  | No information about it                                                                                                                                                                                                                                                                                | Low       |
| <b>8. Tolerance attributes</b>  |      |                                                                                                                                                                              |     |                                                                                                                                                                                                                                                                                                        |           |
| 44                              | 8.01 | Is the taxon able to withstand being out of water for extended periods (e.g. minimum of one or more hours) at some stage of its life cycle?                                  | No  | No information available                                                                                                                                                                                                                                                                               | High      |
| 45                              | 8.02 | Is the taxon tolerant of a wide range of water quality conditions relevant to that taxon? [In the Justification field, indicate the relevant water quality variable(s) being | Yes | Polution and salinity                                                                                                                                                                                                                                                                                  | High      |
| 46                              | 8.03 | Can the taxon be controlled or eradicated in the wild with chemical, biological, or other agents/means?                                                                      | No  | No. This is less likely.                                                                                                                                                                                                                                                                               | High      |

|                          |      |                                                                                                                                                              |           |                                                                                                                                                                                                                                                                                                                                                                                                                                                         |           |
|--------------------------|------|--------------------------------------------------------------------------------------------------------------------------------------------------------------|-----------|---------------------------------------------------------------------------------------------------------------------------------------------------------------------------------------------------------------------------------------------------------------------------------------------------------------------------------------------------------------------------------------------------------------------------------------------------------|-----------|
| 47                       | 8.04 | Is the taxon likely to tolerate or benefit from environmental/human disturbance?                                                                             | Yes       | Can tolerate polluted environments                                                                                                                                                                                                                                                                                                                                                                                                                      | Very high |
| 48                       | 8.05 | Is the taxon able to tolerate salinity levels that are higher or lower than those found in its usual environment?                                            | No        | No information                                                                                                                                                                                                                                                                                                                                                                                                                                          | Low       |
| 49                       | 8.06 | Are there effective natural enemies (predators) of the taxon present in the RA                                                                               | No        | No. No effective natural enemies present in RA area                                                                                                                                                                                                                                                                                                                                                                                                     | Medium    |
| <b>C. Climate change</b> |      |                                                                                                                                                              |           |                                                                                                                                                                                                                                                                                                                                                                                                                                                         |           |
| <b>9. Climate change</b> |      |                                                                                                                                                              |           |                                                                                                                                                                                                                                                                                                                                                                                                                                                         |           |
| 50                       | 9.01 | Under the predicted future climatic conditions, are the risks of entry into the RA area posed by the taxon likely to increase, decrease or not change?       | Increase  | It was hypothesized that climate change might alert the mechanisms of transportation and introduction of non-native species. Commercial and recreational activities will increase, that itself increases the propagule pressure levels of non-native                                                                                                                                                                                                    | Very high |
| 51                       | 9.02 | Under the predicted future climatic conditions, are the risks of establishment posed by the taxon likely to increase, decrease or not change?                | Increase  | Increased temperatures will cause this species establish in higher altitudes                                                                                                                                                                                                                                                                                                                                                                            | Very high |
| 52                       | 9.03 | Under the predicted future climatic conditions, are the risks of dispersal within the RA area posed by the taxon likely to increase, decrease or not change? | Increase  | It might favour by environmental changes (caused by climate change) that will increase resource availability, resulting their widespread.                                                                                                                                                                                                                                                                                                               | High      |
| 53                       | 9.04 | Under the predicted future climatic conditions, what is the likely magnitude of future potential impacts on biodiversity and/or ecological integrity/status? | Higher    | Population densities will increase making them on one hand impossible to eradicate and on the other hand, affecting native organisms due to competition, that does not leave much resources for native ones.                                                                                                                                                                                                                                            | High      |
| 54                       | 9.05 | Under the predicted future climatic conditions, what is the likely magnitude of future potential impacts on ecosystem structure and/or function?             | No change | Difficult to judge                                                                                                                                                                                                                                                                                                                                                                                                                                      | Medium    |
| 55                       | 9.06 | Under the predicted future climatic conditions, what is the likely magnitude of future potential impacts on ecosystem services/socio-economic factors?       | Higher    | Under the predicted future climatic conditions, this species will disperse even wider, that will itself create the problem for native aquatic organisms. The widespread and abundance of this fish which is quite adaptive and plastic to different environmental conditions, will increase its impact on ecosystem services and socio-economic factors. For example: transmission of diseasesIt can also affect aquaculture and recreational fisheries | High      |

| Statistics                                     |             |
|------------------------------------------------|-------------|
| Scores                                         |             |
| <b>BRA</b>                                     | <b>32.0</b> |
| <b>BRA Outcome</b>                             | <b>-</b>    |
| <b>BRA+CCA</b>                                 | <b>42.0</b> |
| <b>BRA+CCA Outcome</b>                         | <b>-</b>    |
| Score partition                                |             |
| <b>A. Biogeography/Historical</b>              | <b>14.0</b> |
| 1. Domestication/Cultivation                   | -2.0        |
| 2. Climate, distribution and introduction risk | 2.0         |
| 3. Invasive elsewhere                          | 14.0        |
| <b>B. Biology/Ecology</b>                      | <b>18.0</b> |
| 4. Undesirable (or persistence) traits         | 7.0         |
| 5. Resource exploitation                       | 5.0         |
| 6. Reproduction                                | 3.0         |
| 7. Dispersal mechanisms                        | -1.0        |
| 8. Tolerance attributes                        | 4.0         |
| <b>C. Climate change</b>                       | <b>10.0</b> |
| 9. Climate change                              | 10.0        |
| Answered Questions                             |             |
| <b>Total</b>                                   | <b>55</b>   |
| <b>A. Biogeography/Historical</b>              | <b>13</b>   |
| 1. Domestication/Cultivation                   | 3           |
| 2. Climate, distribution and introduction risk | 5           |
| 3. Invasive elsewhere                          | 5           |
| <b>B. Biology/Ecology</b>                      | <b>36</b>   |
| 4. Undesirable (or persistence) traits         | 12          |
| 5. Resource exploitation                       | 2           |
| 6. Reproduction                                | 7           |
| 7. Dispersal mechanisms                        | 9           |
| 8. Tolerance attributes                        | 6           |
| <b>C. Climate change</b>                       | <b>6</b>    |
| 9. Climate change                              | 6           |
| Sectors affected                               |             |
| <b>Commercial</b>                              | <b>12</b>   |
| <b>Environmental</b>                           | <b>14</b>   |
| <b>Species or population nuisance traits</b>   | <b>20</b>   |

| Thresholds     |             |
|----------------|-------------|
| <b>BRA</b>     | <b>-</b>    |
| <b>BRA+CCA</b> | <b>-</b>    |
| Confidence     |             |
| <b>BRA+CCA</b> | <b>0.74</b> |
| <b>BRA</b>     | <b>0.73</b> |
| <b>CCA</b>     | <b>0.79</b> |

| Date and Time       |
|---------------------|
| 21/05/2022 14:15:42 |

## AS-ISK v2

| Taxon and Assessor details         |                                                                                                                                                 |
|------------------------------------|-------------------------------------------------------------------------------------------------------------------------------------------------|
| Category                           | Fishes and Lampreys (freshwater)                                                                                                                |
| Taxon name                         | <i>Hypophthalmichthys molitrix</i>                                                                                                              |
| Common name                        | silver carp                                                                                                                                     |
| Assessor                           | Bella Japoshvili                                                                                                                                |
| Risk screening context             |                                                                                                                                                 |
| Reason and socio-economic benefits | Is regularly stocked in South Caucasus                                                                                                          |
| Risk assessment area               | South Caucasus                                                                                                                                  |
| Taxonomy                           | Actinopteri (ray-finned fishes) > Cypriniformes (Carp) > Xenocypridae (East Asian minnows)                                                      |
| Native range                       | China                                                                                                                                           |
| Introduced range                   | Europe and Middle East, USA                                                                                                                     |
| URL                                | <a href="https://www.fishbase.de/summary/Hypophthalmichthys-molitrix.html">https://www.fishbase.de/summary/Hypophthalmichthys-molitrix.html</a> |

|                                                |      |                                                                                                                                                                         | Response | Justification (references and/or other information)                                                                                                                                    | Confidence |
|------------------------------------------------|------|-------------------------------------------------------------------------------------------------------------------------------------------------------------------------|----------|----------------------------------------------------------------------------------------------------------------------------------------------------------------------------------------|------------|
| A. Biogeography/Historical                     |      |                                                                                                                                                                         |          |                                                                                                                                                                                        |            |
| 1. Domestication/Cultivation                   |      |                                                                                                                                                                         |          |                                                                                                                                                                                        |            |
| 1                                              | 1.01 | Has the taxon been the subject of domestication (or cultivation) for at least 20 generations?                                                                           | Yes      | CABI, 2021. <i>Hypophthalmichthys molitrix</i> (Silver carp). <a href="https://www.cabi.org/isc/datasheet/79036">https://www.cabi.org/isc/datasheet/79036</a> (accessed septemeb 2021) | Very high  |
| 2                                              | 1.02 | Is the taxon harvested in the wild and likely to be sold or used in its live form?                                                                                      | Yes      | Not a documented evidence however based on personal data the species is captured in wild and sold in its native areas                                                                  | High       |
| 3                                              | 1.03 | Does the taxon have invasive races, varieties, sub-taxa or congeners?                                                                                                   | Yes      | Other congeners                                                                                                                                                                        | Very high  |
| 2. Climate, distribution and introduction risk |      |                                                                                                                                                                         |          |                                                                                                                                                                                        |            |
| 4                                              | 2.01 | How similar are the climatic conditions of the Risk Assessment (RA) area and the taxon's native range?                                                                  | Medium   | Based on Climatch algorithm                                                                                                                                                            | Medium     |
| 5                                              | 2.02 | What is the quality of the climate matching data?                                                                                                                       | Low      | Due to low accuracy of local climate data                                                                                                                                              | High       |
| 6                                              | 2.03 | Is the taxon already present outside of captivity in the RA area?                                                                                                       | Yes      | Have been detected in eDNA in wild (Beridze et al. 2022)                                                                                                                               | Medium     |
| 7                                              | 2.04 | How many potential vectors could the taxon use to enter in the RA area?                                                                                                 | One      | Aquacultural purpose                                                                                                                                                                   | High       |
| 8                                              | 2.05 | Is the taxon currently found in close proximity to, and likely to enter into, the RA area in the near future (e.g. unintentional and intentional introductions)?        | Yes      | The species can be found in many areas with RA area (Beridze et al 2022)                                                                                                               | High       |
| 3. Invasive elsewhere                          |      |                                                                                                                                                                         |          |                                                                                                                                                                                        |            |
| 9                                              | 3.01 | Has the taxon become naturalised (established viable populations) outside its native range?                                                                             | Yes      | CABI, 2021. <i>Hypophthalmichthys molitrix</i> (Silver carp). <a href="https://www.cabi.org/isc/datasheet/79036">https://www.cabi.org/isc/datasheet/79036</a> (accessed septemeb 2021) | Very high  |
| 10                                             | 3.02 | In the taxon's introduced range, are there known adverse impacts to wild stocks or commercial taxa?                                                                     | Yes      | CABI, 2021. <i>Hypophthalmichthys molitrix</i> (Silver carp). <a href="https://www.cabi.org/isc/datasheet/79036">https://www.cabi.org/isc/datasheet/79036</a> (accessed septemeb 2021) | Low        |
| 11                                             | 3.03 | In the taxon's introduced range, are there known adverse impacts to aquaculture?                                                                                        | No       | No documented evidences exists                                                                                                                                                         | Low        |
| 12                                             | 3.04 | In the taxon's introduced range, are there known adverse impacts to ecosystem services?                                                                                 | Yes      | CABI, 2021. <i>Hypophthalmichthys molitrix</i> (Silver carp). <a href="https://www.cabi.org/isc/datasheet/79036">https://www.cabi.org/isc/datasheet/79036</a> (accessed septemeb 2021) | Low        |
| 13                                             | 3.05 | In the taxon's introduced range, are there known adverse socio-economic impacts?                                                                                        | Yes      | CABI, 2021. <i>Hypophthalmichthys molitrix</i> (Silver carp). <a href="https://www.cabi.org/isc/datasheet/79036">https://www.cabi.org/isc/datasheet/79036</a> (accessed septemeb 2021) | Medium     |
| B. Biology/Ecology                             |      |                                                                                                                                                                         |          |                                                                                                                                                                                        |            |
| 4. Undesirable (or persistence) traits         |      |                                                                                                                                                                         |          |                                                                                                                                                                                        |            |
| 14                                             | 4.01 | Is it likely that the taxon will be poisonous or pose other risks to human health?                                                                                      | No       | Not harmful species                                                                                                                                                                    | Very high  |
| 15                                             | 4.02 | Is it likely that the taxon will smother one or more native taxa (that are not threatened or protected)?                                                                | Yes      | CABI, 2021. <i>Hypophthalmichthys molitrix</i> (Silver carp). <a href="https://www.cabi.org/isc/datasheet/79036">https://www.cabi.org/isc/datasheet/79036</a> (accessed septemeb 2021) | Low        |
| 16                                             | 4.03 | Are there any threatened or protected taxa that the non-native taxon would parasitise in the RA area?                                                                   | No       | Not a parasite species                                                                                                                                                                 | Very high  |
| 17                                             | 4.04 | Is the taxon adaptable in terms of climatic and other environmental conditions, thus enhancing its potential persistence if it has invaded or could invade the RA area? | No       | No documented evidences exists                                                                                                                                                         | Low        |
| 18                                             | 4.05 | Is the taxon likely to disrupt food-web structure/function in aquatic ecosystems if it has invaded or is likely to invade the RA area?                                  | Yes      | CABI, 2021. <i>Hypophthalmichthys molitrix</i> (Silver carp). <a href="https://www.cabi.org/isc/datasheet/79036">https://www.cabi.org/isc/datasheet/79036</a> (accessed septemeb 2021) | Low        |
| 19                                             | 4.06 | Is the taxon likely to exert adverse impacts on ecosystem services in the RA area?                                                                                      | No       | No documented evidences exists from other areas                                                                                                                                        | Low        |
| 20                                             | 4.07 | Is it likely that the taxon will host, and/or act as a vector for, recognised pests and infectious agents that are endemic in the RA area?                              | No       | Not such pest/parasites are known from the RA area                                                                                                                                     | Medium     |
| 21                                             | 4.08 | Is it likely that the taxon will host, and/or act as a vector for, recognised pests and infectious agents that are absent from (novel to) the RA area?                  | Yes      | This is expected though not documented                                                                                                                                                 | High       |
| 22                                             | 4.09 | Is it likely that the taxon will achieve a body size that will make it more likely to be released from captivity?                                                       | Yes      | Growing over 1 m in length                                                                                                                                                             | High       |

|                                 |      |                                                                                                                                                                               |     |                                                                                                                                                                                                                                                                                                                                    |           |
|---------------------------------|------|-------------------------------------------------------------------------------------------------------------------------------------------------------------------------------|-----|------------------------------------------------------------------------------------------------------------------------------------------------------------------------------------------------------------------------------------------------------------------------------------------------------------------------------------|-----------|
| 23                              | 4.10 | Is the taxon capable of sustaining itself in a range of water velocity conditions (e.g. versatile in habitat use)?                                                            | No  | Lotic systems or slowly moving water bodies only                                                                                                                                                                                                                                                                                   | Very high |
| 24                              | 4.11 | Is it likely that the taxon's mode of existence (e.g. excretion of by-products) or behaviours (e.g. feeding) will reduce habitat quality for native taxa?                     | No  | Not known, not a documented evidence exists.                                                                                                                                                                                                                                                                                       | Low       |
| 25                              | 4.12 | Is the taxon likely to maintain a viable population even when present in low densities (or persisting in adverse conditions by way of a dormant form)?                        | Yes | Stuck JG, Porreca AP, Wahl DH, Colombo RE (2015) Contrasting population demographic of invasive silver carp between an impounded and free-flowing river. North American Journal of Fisheries Management 35: 114–122, <a href="http://dx.doi.org/10.1080/0275.5947.2014.986343">http://dx.doi.org/10.1080/0275.5947.2014.986343</a> | Low       |
| <b>5. Resource exploitation</b> |      |                                                                                                                                                                               |     |                                                                                                                                                                                                                                                                                                                                    |           |
| 26                              | 5.01 | Is the taxon likely to consume threatened or protected native taxa in the RA area?                                                                                            | No  | No documented evidence exists                                                                                                                                                                                                                                                                                                      | Low       |
| 27                              | 5.02 | Is the taxon likely to sequester food resources (including nutrients) to the detriment of native taxa in the RA area?                                                         | Yes | Based on professional judgement though no documented evidences exists                                                                                                                                                                                                                                                              | Low       |
| <b>6. Reproduction</b>          |      |                                                                                                                                                                               |     |                                                                                                                                                                                                                                                                                                                                    |           |
| 28                              | 6.01 | Is the taxon likely to exhibit parental care and/or to reduce age-at-maturity in response to environmental conditions?                                                        | No  | Kottelat, M., & Freyhof, J. (2007). Handbook of European freshwater fishes. Publications Kottelat.                                                                                                                                                                                                                                 | Very high |
| 29                              | 6.02 | Is the taxon likely to produce viable gametes or propagules (in the RA area)?                                                                                                 | No  | Not reported yet                                                                                                                                                                                                                                                                                                                   | Medium    |
| 30                              | 6.03 | Is the taxon likely to hybridise naturally with native taxa?                                                                                                                  | No  | No such case is known                                                                                                                                                                                                                                                                                                              | High      |
| 31                              | 6.04 | Is the taxon likely to be hermaphroditic or to display asexual reproduction?                                                                                                  | No  | Not a documented evidence exists                                                                                                                                                                                                                                                                                                   | High      |
| 32                              | 6.05 | Is the taxon dependent on the presence of another taxon (or specific habitat features) to complete its life cycle?                                                            | No  | It completes its life cycle without any other species                                                                                                                                                                                                                                                                              | Very high |
| 33                              | 6.06 | Is the taxon known (or likely) to produce a large number of propagules or offspring within a short time span (e.g. < 1 year)?                                                 | Yes | Half a million of eggs per year - Kottelat, M., & Freyhof, J. (2007). Handbook of European freshwater fishes. Publications Kottelat.                                                                                                                                                                                               | Very high |
| 34                              | 6.07 | How many time units (days, months, years) does the taxon require to reach the age-at-first-reproduction?                                                                      | 5   | years                                                                                                                                                                                                                                                                                                                              | High      |
| <b>7. Dispersal mechanisms</b>  |      |                                                                                                                                                                               |     |                                                                                                                                                                                                                                                                                                                                    |           |
| 35                              | 7.01 | How many potential internal vectors/pathways could the taxon use to disperse within the RA area (with suitable vectors/pathways)?                                             | > 1 | Species is intentionally introduced to water bodies for recreational purposes while its juveniles can also unintentionally be spread as a hitchhiker                                                                                                                                                                               | High      |
| 36                              | 7.02 | Will any of these vectors/pathways bring the taxon in close proximity to one or more protected areas (e.g. MCZ, MPA, SSSI)?                                                   | Yes | Along the Black Sea Within RA area there is great chance for this species to occur in PA using the intentionally or through water currents                                                                                                                                                                                         | High      |
| 37                              | 7.03 | Does the taxon have a means of actively attaching itself to hard substrata (e.g. ship hulls, pilings, buoys) such that it enhances the likelihood of dispersal?               | No  | No such fact has ever been observed                                                                                                                                                                                                                                                                                                | Very high |
| 38                              | 7.04 | Is natural dispersal of the taxon likely to occur as eggs (for animals) or as propagules (for plants: seeds, spores) in the RA area?                                          | Yes | Eggs need to drift before hatching - Kottelat, M., & Freyhof, J. (2007). Handbook of European freshwater fishes. Publications Kottelat.                                                                                                                                                                                            | Very high |
| 39                              | 7.05 | Is natural dispersal of the taxon likely to occur as larvae/juveniles (for animals) or as fragments/seedlings (for plants) in the RA area?                                    | Yes | Kottelat, M., & Freyhof, J. (2007). Handbook of European freshwater fishes. Publications Kottelat.                                                                                                                                                                                                                                 | Medium    |
| 40                              | 7.06 | Are older life stages of the taxon likely to migrate in the RA area for reproduction?                                                                                         | No  | No such an evidence exists                                                                                                                                                                                                                                                                                                         | Low       |
| 41                              | 7.07 | Are propagules or eggs of the taxon likely to be dispersed in the RA area by other animals?                                                                                   | No  | No such an evidence is known                                                                                                                                                                                                                                                                                                       | High      |
| 42                              | 7.08 | Is dispersal of the taxon along any of the vectors/pathways mentioned in the previous seven questions (35–41; i.e. both unintentional or intentional) likely to be?           | Yes | The eggs can be spread with large quantity through water currents                                                                                                                                                                                                                                                                  | High      |
| 43                              | 7.09 | Is dispersal of the taxon density dependent?                                                                                                                                  | No  | No documented evidence exists                                                                                                                                                                                                                                                                                                      | Medium    |
| <b>8. Tolerance attributes</b>  |      |                                                                                                                                                                               |     |                                                                                                                                                                                                                                                                                                                                    |           |
| 44                              | 8.01 | Is the taxon able to withstand being out of water for extended periods (e.g. minimum of one or more hours) at some stage of its life cycle?                                   | No  | No documented evidence exists                                                                                                                                                                                                                                                                                                      | High      |
| 45                              | 8.02 | Is the taxon tolerant of a wide range of water quality conditions relevant to that taxon? [In the Justification field, indicate the relevant water quality variable(s) being] | No  | No documented evidence exists                                                                                                                                                                                                                                                                                                      | Low       |
| 46                              | 8.03 | Can the taxon be controlled or eradicated in the wild with chemical, biological, or other agents/means?                                                                       | No  | No documented evidence exist                                                                                                                                                                                                                                                                                                       | High      |
| 47                              | 8.04 | Is the taxon likely to tolerate or benefit from environmental/human disturbance?                                                                                              | No  | Not expected, no documented evidence exist                                                                                                                                                                                                                                                                                         | Medium    |
| 48                              | 8.05 | Is the taxon able to tolerate salinity levels that are higher or lower than those found in its usual environment?                                                             | No  | No documented evidence exist                                                                                                                                                                                                                                                                                                       | Low       |
| 49                              | 8.06 | Are there effective natural enemies (predators) of the taxon present in the RA                                                                                                | No  | Based on professional judgement                                                                                                                                                                                                                                                                                                    | High      |
| <b>C. Climate change</b>        |      |                                                                                                                                                                               |     |                                                                                                                                                                                                                                                                                                                                    |           |
| <b>9. Climate change</b>        |      |                                                                                                                                                                               |     |                                                                                                                                                                                                                                                                                                                                    |           |

|    |      |                                                                                                                                                              |           |                                 |     |
|----|------|--------------------------------------------------------------------------------------------------------------------------------------------------------------|-----------|---------------------------------|-----|
| 50 | 9.01 | Under the predicted future climatic conditions, are the risks of entry into the RA area posed by the taxon likely to increase, decrease or not change?       | No change | Based on professional judgement | Low |
| 51 | 9.02 | Under the predicted future climatic conditions, are the risks of establishment posed by the taxon likely to increase, decrease or not change?                | Increase  | Based on professional judgement | Low |
| 52 | 9.03 | Under the predicted future climatic conditions, are the risks of dispersal within the RA area posed by the taxon likely to increase, decrease or not change? | Increase  | Based on professional judgement | Low |
| 53 | 9.04 | Under the predicted future climatic conditions, what is the likely magnitude of future potential impacts on biodiversity and/or ecological integrity/status? | Higher    | Based on professional judgement | Low |
| 54 | 9.05 | Under the predicted future climatic conditions, what is the likely magnitude of future potential impacts on ecosystem structure and/or function?             | Higher    | Based on professional judgement | Low |
| 55 | 9.06 | Under the predicted future climatic conditions, what is the likely magnitude of future potential impacts on ecosystem services/socio-economic factors?       | Higher    | Based on professional judgement | Low |

| Statistics                                     |             |
|------------------------------------------------|-------------|
| Scores                                         |             |
| <b>BRA</b>                                     | <b>24.0</b> |
| <b>BRA Outcome</b>                             | <b>-</b>    |
| <b>BRA+CCA</b>                                 | <b>34.0</b> |
| <b>BRA+CCA Outcome</b>                         | <b>-</b>    |
| Score partition                                |             |
| <b>A. Biogeography/Historical</b>              | <b>19.0</b> |
| 1. Domestication/Cultivation                   | 4.0         |
| 2. Climate, distribution and introduction risk | 1.0         |
| 3. Invasive elsewhere                          | 14.0        |
| <b>B. Biology/Ecology</b>                      | <b>5.0</b>  |
| 4. Undesirable (or persistence) traits         | 4.0         |
| 5. Resource exploitation                       | 2.0         |
| 6. Reproduction                                | -1.0        |
| 7. Dispersal mechanisms                        | 2.0         |
| 8. Tolerance attributes                        | -2.0        |
| <b>C. Climate change</b>                       | <b>10.0</b> |
| 9. Climate change                              | 10.0        |
| Answered Questions                             |             |
| <b>Total</b>                                   | <b>55</b>   |
| <b>A. Biogeography/Historical</b>              | <b>13</b>   |
| 1. Domestication/Cultivation                   | 3           |
| 2. Climate, distribution and introduction risk | 5           |
| 3. Invasive elsewhere                          | 5           |
| <b>B. Biology/Ecology</b>                      | <b>36</b>   |
| 4. Undesirable (or persistence) traits         | 12          |
| 5. Resource exploitation                       | 2           |
| 6. Reproduction                                | 7           |
| 7. Dispersal mechanisms                        | 9           |
| 8. Tolerance attributes                        | 6           |
| <b>C. Climate change</b>                       | <b>6</b>    |
| 9. Climate change                              | 6           |
| Sectors affected                               |             |
| <b>Commercial</b>                              | <b>16</b>   |
| <b>Environmental</b>                           | <b>10</b>   |
| <b>Species or population nuisance traits</b>   | <b>12</b>   |

| Thresholds     |             |
|----------------|-------------|
| <b>BRA</b>     | <b>-</b>    |
| <b>BRA+CCA</b> | <b>-</b>    |
| Confidence     |             |
| <b>BRA+CCA</b> | <b>0.58</b> |
| <b>BRA</b>     | <b>0.62</b> |
| <b>CCA</b>     | <b>0.25</b> |

| Date and Time       |
|---------------------|
| 16/05/2022 13:17:19 |

AS-ISK v2

| Taxon and Assessor details         |                                                                                                    |
|------------------------------------|----------------------------------------------------------------------------------------------------|
| Category                           | Fishes and Lampreys (freshwater)                                                                   |
| Taxon name                         | <i>Hypophthalmichthys molitrix</i>                                                                 |
| Common name                        | silver carp                                                                                        |
| Assessor                           | Giorgi Eritashvili                                                                                 |
| Risk screening context             |                                                                                                    |
| Reason and socio-economic benefits | H. molitrix has long been cultivated in China. By weight, more silver carp are produced worldwide  |
| Risk assessment area               | South Caucasus                                                                                     |
| Taxonomy                           | <i>Hypophthalmichthys molitrix</i> (Valenciennes, 1844)                                            |
| Native range                       | Asia: Native to most major Pacific drainages of East Asia from Amur to Xi Jiang, China and Hanoi,  |
| Introduced range                   | Introduced around the world for aquaculture and control of algal blooms. The species has also been |
| URL                                | <a href="https://www.fishbase.in/summary/274">https://www.fishbase.in/summary/274</a>              |

|                                                |      | Response                                                                                                                                                                | Justification (references and/or other information) | Confidence                                                                                                                                                                                                                                                                                                                                                                                                                                                                                                                                                                                                                        |           |
|------------------------------------------------|------|-------------------------------------------------------------------------------------------------------------------------------------------------------------------------|-----------------------------------------------------|-----------------------------------------------------------------------------------------------------------------------------------------------------------------------------------------------------------------------------------------------------------------------------------------------------------------------------------------------------------------------------------------------------------------------------------------------------------------------------------------------------------------------------------------------------------------------------------------------------------------------------------|-----------|
| A. Biogeography/Historical                     |      |                                                                                                                                                                         |                                                     |                                                                                                                                                                                                                                                                                                                                                                                                                                                                                                                                                                                                                                   |           |
| 1. Domestication/Cultivation                   |      |                                                                                                                                                                         |                                                     |                                                                                                                                                                                                                                                                                                                                                                                                                                                                                                                                                                                                                                   |           |
| 1                                              | 1.01 | Has the taxon been the subject of domestication (or cultivation) for at least 20 generations?                                                                           | Yes                                                 | This fish is one of among 3 or 4 species of cyprinids whose world production in aquaculture exceeds 1 million tons per year.                                                                                                                                                                                                                                                                                                                                                                                                                                                                                                      | Very high |
| 2                                              | 1.02 | Is the taxon harvested in the wild and likely to be sold or used in its live form?                                                                                      | Yes                                                 | Own data                                                                                                                                                                                                                                                                                                                                                                                                                                                                                                                                                                                                                          | Very high |
| 3                                              | 1.03 | Does the taxon have invasive races, varieties, sub-taxa or congeners?                                                                                                   | Yes                                                 | Several countries report adverse ecological impact after introduction of <i>H. molitrix</i> .                                                                                                                                                                                                                                                                                                                                                                                                                                                                                                                                     | Very high |
| 2. Climate, distribution and introduction risk |      |                                                                                                                                                                         |                                                     |                                                                                                                                                                                                                                                                                                                                                                                                                                                                                                                                                                                                                                   |           |
| 4                                              | 2.01 | How similar are the climatic conditions of the Risk Assessment (RA) area and the taxon's native range?                                                                  | Medium                                              | World Map of the Köppen-Geiger climate classification                                                                                                                                                                                                                                                                                                                                                                                                                                                                                                                                                                             | Medium    |
| 5                                              | 2.02 | What is the quality of the climate matching data?                                                                                                                       | Medium                                              | World Map of the Köppen-Geiger climate classification                                                                                                                                                                                                                                                                                                                                                                                                                                                                                                                                                                             | Medium    |
| 6                                              | 2.03 | Is the taxon already present outside of captivity in the RA area?                                                                                                       | Yes                                                 | It was introduced in Georgia from China and now it is distributed in Jandari, Kumisi, Lisi lakes and in other places (Ninua et al.                                                                                                                                                                                                                                                                                                                                                                                                                                                                                                | Very high |
| 7                                              | 2.04 | How many potential vectors could the taxon use to enter in the RA area?                                                                                                 | One                                                 | This species enters the region by human intentionally for aquacultural purposes.                                                                                                                                                                                                                                                                                                                                                                                                                                                                                                                                                  | High      |
| 8                                              | 2.05 | Is the taxon currently found in close proximity to, and likely to enter into, the RA area in the near future (e.g. unintentional and intentional introductions)?        | Yes                                                 | This species is already occurring in the SC region. As for the neighbouring regions, <i>H. molitrix</i> introduced to Iran from China in 1992.                                                                                                                                                                                                                                                                                                                                                                                                                                                                                    | Very high |
| 3. Invasive elsewhere                          |      |                                                                                                                                                                         |                                                     |                                                                                                                                                                                                                                                                                                                                                                                                                                                                                                                                                                                                                                   |           |
| 9                                              | 3.01 | Has the taxon become naturalised (established viable populations) outside its                                                                                           | Yes                                                 | Data deficient                                                                                                                                                                                                                                                                                                                                                                                                                                                                                                                                                                                                                    | Medium    |
| 10                                             | 3.02 | In the taxon's introduced range, are there known adverse impacts to wild stocks or commercial taxa?                                                                     | Yes                                                 | In the USA native fishes are likely already being impacted by reduced phytoplankton available for feeding in areas where silver carp are found.                                                                                                                                                                                                                                                                                                                                                                                                                                                                                   | Very high |
| 11                                             | 3.03 | In the taxon's introduced range, are there known adverse impacts to aquaculture?                                                                                        | No                                                  | Such a fact is not known                                                                                                                                                                                                                                                                                                                                                                                                                                                                                                                                                                                                          | Low       |
| 12                                             | 3.04 | In the taxon's introduced range, are there known adverse impacts to ecosystem                                                                                           | No                                                  | Such a fact is not known                                                                                                                                                                                                                                                                                                                                                                                                                                                                                                                                                                                                          | Low       |
| 13                                             | 3.05 | In the taxon's introduced range, are there known adverse socio-economic impacts?                                                                                        | Yes                                                 | The Commercial Fishing Industry depends heavily on the health and ecological state of the Great Lakes, USA. The total value of the Commercial Fisheries in the Great Lakes during 2011 was over \$33 million dollars. The presence of Asian carp would have multiple impacts, including: Increased costs and decreased revenues for commercial harvesters. Small prey fish of commercially fished species would be impacted through direct consumption by Asian carp. Increased competition for food resources with young and mature native species. This decrease in revenue would in turn reduce the level of gross profits and | High      |
| B. Biology/Ecology                             |      |                                                                                                                                                                         |                                                     |                                                                                                                                                                                                                                                                                                                                                                                                                                                                                                                                                                                                                                   |           |
| 4. Undesirable (or persistence) traits         |      |                                                                                                                                                                         |                                                     |                                                                                                                                                                                                                                                                                                                                                                                                                                                                                                                                                                                                                                   |           |
| 14                                             | 4.01 | Is it likely that the taxon will be poisonous or pose other risks to human health?                                                                                      | No                                                  | This species does not pose a threat to humans.                                                                                                                                                                                                                                                                                                                                                                                                                                                                                                                                                                                    | Very high |
| 15                                             | 4.02 | Is it likely that the taxon will smother one or more native taxa (that are not threatened or protected)?                                                                | Yes                                                 | Planktivorous Silver Carp <i>Hypophthalmichthys molitrix</i> and Bighead Carp <i>H. nobilis</i> have successfully invaded much of the Upper Mississippi River System and its tributaries during the last 30 years. During the initial years of the invasion, concurrent declines in the body condition and the catch per unit effort (CPUE) of planktivorous Gizzard Shad <i>Dorosoma cepedianum</i> and Bigmouth Buffalo <i>Ictiobus cyprinellus</i> were attributed to competition with Asian carp (Pendleton et al. 2017).                                                                                                     | High      |
| 16                                             | 4.03 | Are there any threatened or protected taxa that the non-native taxon would parasitise in the RA area?                                                                   | Yes                                                 | There are several threatened and protected species in the SC region which may have been under pressure of <i>H. molitrix</i> , e.g. <i>Luciobarbus capito</i> , <i>L. mursa</i> , <i>Salmo</i> spp, <i>Acipenser</i> spp, etc.                                                                                                                                                                                                                                                                                                                                                                                                    | Medium    |
| 17                                             | 4.04 | Is the taxon adaptable in terms of climatic and other environmental conditions, thus enhancing its potential persistence if it has invaded or could invade the RA area? | Yes                                                 | Own judgement                                                                                                                                                                                                                                                                                                                                                                                                                                                                                                                                                                                                                     | Medium    |
| 18                                             | 4.05 | Is the taxon likely to disrupt food-web structure/function in aquatic ecosystems if it has invaded or is likely to invade the RA                                        | Yes                                                 | <i>H. molitrix</i> threaten to invade the Great Lakes and disrupt aquatic food webs and fisheries in USA (Zhang et al. 2011). This is expected to happen in the SC region.                                                                                                                                                                                                                                                                                                                                                                                                                                                        | High      |
| 19                                             | 4.06 | Is the taxon likely to exert adverse impacts on ecosystem services in the RA area?                                                                                      | No                                                  | It is not expected that this will happen                                                                                                                                                                                                                                                                                                                                                                                                                                                                                                                                                                                          | Medium    |

|                                 |      |                                                                                                                                                                              |                |                                                                                                                                                                                                                                                                                                                  |           |
|---------------------------------|------|------------------------------------------------------------------------------------------------------------------------------------------------------------------------------|----------------|------------------------------------------------------------------------------------------------------------------------------------------------------------------------------------------------------------------------------------------------------------------------------------------------------------------|-----------|
| 20                              | 4.07 | Is it likely that the taxon will host, and/or act as a vector for, recognised pests and infectious agents that are endemic in the RA                                         | Not applicable | It is difficult to assess this because relevant studies have not been conducted                                                                                                                                                                                                                                  | Low       |
| 21                              | 4.08 | Is it likely that the taxon will host, and/or act as a vector for, recognised pests and infectious agents that are absent from (novel to) the RA area?                       | Not applicable | Whether bigheaded carps act as carriers and/or hosts for exotic and native parasitic and infectious diseases is largely unknown. The prevalence of infectious diseases in bigheaded carps is also largely unknown.                                                                                               | Medium    |
| 22                              | 4.09 | Is it likely that the taxon will achieve a body size that will make it more likely to be released from captivity?                                                            | Yes            | H. molitrix is widely used in aquaculture. Its max length is 120 cm. Common length : 18.0 cm, max. published weight: 50.0 kg                                                                                                                                                                                     | Very high |
| 23                              | 4.10 | Is the taxon capable of sustaining itself in a range of water velocity conditions (e.g. versatile in habitat use)?                                                           | No             | Found in their natural range in rivers with marked water-level fluctuations and overwinters in middle and lower stretches, swimming just beneath the surface. They feed in shallow (0.5-1.0 m deep) and warm (over 21°C) backwaters, lakes and flooded areas with slow current on phytoplankton and zooplankton. | Very high |
| 24                              | 4.11 | Is it likely that the taxon's mode of existence (e.g. excretion of by-products) or behaviours (e.g. feeding) will reduce habitat quality for native taxa?                    | Yes            | Data deficient                                                                                                                                                                                                                                                                                                   | Low       |
| 25                              | 4.12 | Is the taxon likely to maintain a viable population even when present in low densities (or persisting in adverse conditions by way of a dormant form)?                       | Yes            | Data deficient                                                                                                                                                                                                                                                                                                   | Low       |
| <b>5. Resource exploitation</b> |      |                                                                                                                                                                              |                |                                                                                                                                                                                                                                                                                                                  |           |
| 26                              | 5.01 | Is the taxon likely to consume threatened or protected native taxa in the RA area?                                                                                           | No             | H. molitrix is plankton-feeding species and consumption of protected species by it has not been recorded in the SC region.                                                                                                                                                                                       | Medium    |
| 27                              | 5.02 | Is the taxon likely to sequester food resources (including nutrients) to the detriment of native taxa in the RA area?                                                        | Yes            | This species is a competitor to local species                                                                                                                                                                                                                                                                    | Medium    |
| <b>6. Reproduction</b>          |      |                                                                                                                                                                              |                |                                                                                                                                                                                                                                                                                                                  |           |
| 28                              | 6.01 | Is the taxon likely to exhibit parental care and/or to reduce age-at-maturity in response to environmental conditions?                                                       | Not applicable | Data deficient                                                                                                                                                                                                                                                                                                   | Low       |
| 29                              | 6.02 | Is the taxon likely to produce viable gametes or propagules (in the RA area)?                                                                                                | No             | This species does not breed in the region                                                                                                                                                                                                                                                                        | High      |
| 30                              | 6.03 | Is the taxon likely to hybridise naturally with native taxa?                                                                                                                 | No             | Such a fact is not known                                                                                                                                                                                                                                                                                         | Low       |
| 31                              | 6.04 | Is the taxon likely to be hermaphroditic or to display asexual reproduction?                                                                                                 | No             | Such a fact is not known                                                                                                                                                                                                                                                                                         | Medium    |
| 32                              | 6.05 | Is the taxon dependent on the presence of another taxon (or specific habitat features) to complete its life cycle?                                                           | No             | Own judgement                                                                                                                                                                                                                                                                                                    | Medium    |
| 33                              | 6.06 | Is the taxon known (or likely) to produce a large number of propagules or offspring within a short time span (e.g. < 1 year)?                                                | Yes            | Fecundity of H. molitrix is 500000-600000 eggs (Ninua et al. 2013).                                                                                                                                                                                                                                              | High      |
| 34                              | 6.07 | How many time units (days, months, years) does the taxon require to reach the age-at-first-reproduction?                                                                     | 5              | H. molitrix sexually matures at the age of 5-6 (Ninua et al. 2013).                                                                                                                                                                                                                                              | Very high |
| <b>7. Dispersal mechanisms</b>  |      |                                                                                                                                                                              |                |                                                                                                                                                                                                                                                                                                                  |           |
| 35                              | 7.01 | How many potential internal vectors/pathways could the taxon use to disperse within the RA area (with suitable protected areas (e.g. MCZ, MPA, SSSI)?                        | One            | This species is spread by humans in the SC region (Ninua et al. 2013).                                                                                                                                                                                                                                           | High      |
| 36                              | 7.02 | Will any of these vectors/pathways bring the taxon in close proximity to one or more protected areas (e.g. MCZ, MPA, SSSI)?                                                  | Yes            | There is a probability of this                                                                                                                                                                                                                                                                                   | Low       |
| 37                              | 7.03 | Does the taxon have a means of actively attaching itself to hard substrata (e.g. ship hulls, pilings, buoys) such that it enhances the likelihood of dispersal?              | No             | This species does not have such means.                                                                                                                                                                                                                                                                           | Very high |
| 38                              | 7.04 | Is natural dispersal of the taxon likely to occur as eggs (for animals) or as propagules (for plants: seeds, spores) in the RA area?                                         | No             | This species does not reproduce in the SC region.                                                                                                                                                                                                                                                                | Medium    |
| 39                              | 7.05 | Is natural dispersal of the taxon likely to occur as larvae/juveniles (for animals) or as fragments/seedlings (for plants) in the RA area?                                   | No             | This species does not reproduce in the SC region.                                                                                                                                                                                                                                                                | Medium    |
| 40                              | 7.06 | Are older life stages of the taxon likely to migrate in the RA area for reproduction?                                                                                        | No             | This species does not reproduce in the SC region.                                                                                                                                                                                                                                                                | Medium    |
| 41                              | 7.07 | Are propagules or eggs of the taxon likely to be dispersed in the RA area by other animals?                                                                                  | No             | No such fact has been detected                                                                                                                                                                                                                                                                                   | Medium    |
| 42                              | 7.08 | Is dispersal of the taxon along any of the vectors/pathways mentioned in the previous seven questions (35-41; i.e. both unintentional or intentional) likely to be           | Not applicable | Data deficient                                                                                                                                                                                                                                                                                                   | Low       |
| 43                              | 7.09 | Is dispersal of the taxon density dependent?                                                                                                                                 | Yes            | Data deficient                                                                                                                                                                                                                                                                                                   | Low       |
| <b>8. Tolerance attributes</b>  |      |                                                                                                                                                                              |                |                                                                                                                                                                                                                                                                                                                  |           |
| 44                              | 8.01 | Is the taxon able to withstand being out of water for extended periods (e.g. minimum of one or more hours) at some stage of its life cycle?                                  | No             | No such fact has been described                                                                                                                                                                                                                                                                                  | Medium    |
| 45                              | 8.02 | Is the taxon tolerant of a wide range of water quality conditions relevant to that taxon? [In the Justification field, indicate the relevant water quality variable(s) being | Yes            | Found in their natural range in rivers with marked water-level fluctuations and overwinters in middle and lower stretches, swimming just beneath the surface (fishbase.org).                                                                                                                                     | Low       |



|    |      |                                                                                                                   |     |                                                                                                                                                                                 |           |
|----|------|-------------------------------------------------------------------------------------------------------------------|-----|---------------------------------------------------------------------------------------------------------------------------------------------------------------------------------|-----------|
| 46 | 8.03 | Can the taxon be controlled or eradicated in the wild with chemical, biological, or other agents/means?           | Yes | Own judgement                                                                                                                                                                   | Medium    |
| 47 | 8.04 | Is the taxon likely to tolerate or benefit from environmental/human disturbance?                                  | Yes | This species is spread by humans for aquacultural purposes                                                                                                                      | High      |
| 48 | 8.05 | Is the taxon able to tolerate salinity levels that are higher or lower than those found in its usual environment? | Yes | H. molitrix can tolerate salinities up to 12 ppt and low dissolved oxygen (3mg/L).                                                                                              | High      |
| 49 | 8.06 | Are there effective natural enemies (predators) of the taxon present in the RA area?                              | Yes | There are several predators distributed in the SC region which can control the H. molitrix populations, e.g. Esox lucius, Silurus glanis, Squalius spp, Sander lucioperca, etc. | Very high |

#### C. Climate change

##### 9. Climate change

|    |      |                                                                                                                                                              |           |               |        |
|----|------|--------------------------------------------------------------------------------------------------------------------------------------------------------------|-----------|---------------|--------|
| 50 | 9.01 | Under the predicted future climatic conditions, are the risks of entry into the RA area posed by the taxon likely to increase, decrease or not change?       | No change | Own judgement | Medium |
| 51 | 9.02 | Under the predicted future climatic conditions, are the risks of establishment posed by the taxon likely to increase, decrease or not change?                | No change | Own judgement | Medium |
| 52 | 9.03 | Under the predicted future climatic conditions, are the risks of dispersal within the RA area posed by the taxon likely to increase, decrease or not change? | No change | Own judgement | Medium |
| 53 | 9.04 | Under the predicted future climatic conditions, what is the likely magnitude of future potential impacts on biodiversity and/or ecological integrity/status? | No change | Own judgement | Medium |
| 54 | 9.05 | Under the predicted future climatic conditions, what is the likely magnitude of future potential impacts on ecosystem structure and/or function?             | No change | Own judgement | Medium |
| 55 | 9.06 | Under the predicted future climatic conditions, what is the likely magnitude of future potential impacts on ecosystem services/socio-economic factors?       | Lower     | Own judgement | Medium |

| Statistics                                     |             |
|------------------------------------------------|-------------|
| Scores                                         |             |
| <b>BRA</b>                                     | <b>20.5</b> |
| <b>BRA Outcome</b>                             | <b>-</b>    |
| <b>BRA+CCA</b>                                 | <b>18.5</b> |
| <b>BRA+CCA Outcome</b>                         | <b>-</b>    |
| Score partition                                |             |
| <b>A. Biogeography/Historical</b>              | <b>12.5</b> |
| 1. Domestication/Cultivation                   | 4.0         |
| 2. Climate, distribution and introduction risk | 1.0         |
| 3. Invasive elsewhere                          | 7.5         |
| <b>B. Biology/Ecology</b>                      | <b>8.0</b>  |
| 4. Undesirable (or persistence) traits         | 7.0         |
| 5. Resource exploitation                       | 2.0         |
| 6. Reproduction                                | -1.0        |
| 7. Dispersal mechanisms                        | -3.0        |
| 8. Tolerance attributes                        | 3.0         |
| <b>C. Climate change</b>                       | <b>-2.0</b> |
| 9. Climate change                              | -2.0        |
| Answered Questions                             |             |
| <b>Total</b>                                   | <b>55</b>   |
| <b>A. Biogeography/Historical</b>              | <b>13</b>   |
| 1. Domestication/Cultivation                   | 3           |
| 2. Climate, distribution and introduction risk | 5           |
| 3. Invasive elsewhere                          | 5           |
| <b>B. Biology/Ecology</b>                      | <b>36</b>   |
| 4. Undesirable (or persistence) traits         | 12          |
| 5. Resource exploitation                       | 2           |
| 6. Reproduction                                | 7           |
| 7. Dispersal mechanisms                        | 9           |
| 8. Tolerance attributes                        | 6           |
| <b>C. Climate change</b>                       | <b>6</b>    |
| 9. Climate change                              | 6           |
| Sectors affected                               |             |
| <b>Commercial</b>                              | <b>8</b>    |
| <b>Environmental</b>                           | <b>3</b>    |
| <b>Species or population nuisance traits</b>   | <b>10</b>   |

| Thresholds     |             |
|----------------|-------------|
| <b>BRA</b>     | <b>-</b>    |
| <b>BRA+CCA</b> | <b>-</b>    |
| Confidence     |             |
| <b>BRA+CCA</b> | <b>0.60</b> |
| <b>BRA</b>     | <b>0.61</b> |
| <b>CCA</b>     | <b>0.50</b> |

Date and Time

05/05/2022 19:51:22

AS-ISK v2

| Taxon and Assessor details         |                                                                                                                                         |
|------------------------------------|-----------------------------------------------------------------------------------------------------------------------------------------|
| Category                           | Fishes and Lampreys (freshwater)                                                                                                        |
| Taxon name                         | <i>Hypophthalmichthys molitrix</i>                                                                                                      |
| Common name                        | silver carp                                                                                                                             |
| Assessor                           | Tatia Kuljanishvili                                                                                                                     |
| Risk screening context             |                                                                                                                                         |
| Reason and socio-economic benefits | Has been introduced worldwide for Aquaculture and algae control                                                                         |
| Risk assessment area               | South Caucasus                                                                                                                          |
| Taxonomy                           | Actinopteri (ray-finned fishes) > Cypriniformes (Carps) > Xenocypridae                                                                  |
| Native range                       | East China and Russia                                                                                                                   |
| Introduced range                   | South Caucasus (Arm, Azr Geo)                                                                                                           |
| URL                                | <a href="https://www.fishbase.se/summary/Ctenopharyngodon-idella.html">https://www.fishbase.se/summary/Ctenopharyngodon-idella.html</a> |

|                                                |      |                                                                                                                                                                         | Response | Justification (references and/or other information)                                                                                                                                                                                                                                                                                                                                                                                                                                                                         | Confidence |
|------------------------------------------------|------|-------------------------------------------------------------------------------------------------------------------------------------------------------------------------|----------|-----------------------------------------------------------------------------------------------------------------------------------------------------------------------------------------------------------------------------------------------------------------------------------------------------------------------------------------------------------------------------------------------------------------------------------------------------------------------------------------------------------------------------|------------|
| A. Biogeography/Historical                     |      |                                                                                                                                                                         |          |                                                                                                                                                                                                                                                                                                                                                                                                                                                                                                                             |            |
| 1. Domestication/Cultivation                   |      |                                                                                                                                                                         |          |                                                                                                                                                                                                                                                                                                                                                                                                                                                                                                                             |            |
| 1                                              | 1.01 | Has the taxon been the subject of domestication (or cultivation) for at least 20 generations?                                                                           | Yes      | It has been grown in aquaculture facilities more than 20 generations                                                                                                                                                                                                                                                                                                                                                                                                                                                        | Very high  |
| 2                                              | 1.02 | Is the taxon harvested in the wild and likely to be sold or used in its live form?                                                                                      | Yes      | Yes. Taxon is harvested in wild and is sold in its live form                                                                                                                                                                                                                                                                                                                                                                                                                                                                | Very high  |
| 3                                              | 1.03 | Does the taxon have invasive races, varieties, sub-taxa or congeners?                                                                                                   | Yes      | for example <i>Hypophthalmichthys nobilis</i> and <i>Ctenopharyngodon idella</i>                                                                                                                                                                                                                                                                                                                                                                                                                                            | High       |
| 2. Climate, distribution and introduction risk |      |                                                                                                                                                                         |          |                                                                                                                                                                                                                                                                                                                                                                                                                                                                                                                             |            |
| 4                                              | 2.01 | How similar are the climatic conditions of the Risk Assessment (RA) area and the taxon's native range?                                                                  | High     | The climate is more or less similar out of 19 stations, 15 match at value 9 (out of 10).                                                                                                                                                                                                                                                                                                                                                                                                                                    | High       |
| 5                                              | 2.02 | What is the quality of the climate matching data?                                                                                                                       | Medium   | Climatch data is medium since there are not much station on the RA area                                                                                                                                                                                                                                                                                                                                                                                                                                                     | Medium     |
| 6                                              | 2.03 | Is the taxon already present outside of captivity in the RA area?                                                                                                       | Yes      | This species is released in ponds and rivers in RA area                                                                                                                                                                                                                                                                                                                                                                                                                                                                     | Very high  |
| 7                                              | 2.04 | How many potential vectors could the taxon use to enter in the RA area?                                                                                                 | >1       | Aquaculture, recreational fisheries                                                                                                                                                                                                                                                                                                                                                                                                                                                                                         | Very high  |
| 8                                              | 2.05 | Is the taxon currently found in close proximity to, and likely to enter into, the RA area in the near future (e.g. unintentional and intentional introductions)?        | Yes      | This species is released in ponds and rivers in RA area                                                                                                                                                                                                                                                                                                                                                                                                                                                                     | Very high  |
| 3. Invasive elsewhere                          |      |                                                                                                                                                                         |          |                                                                                                                                                                                                                                                                                                                                                                                                                                                                                                                             |            |
| 9                                              | 3.01 | Has the taxon become naturalised (established viable populations) outside its                                                                                           | Yes      | Yes. has become naturalised for example in Taiwan (Thang 1960).                                                                                                                                                                                                                                                                                                                                                                                                                                                             | High       |
| 10                                             | 3.02 | In the taxon's introduced range, are there known adverse impacts to wild stocks or commercial taxa?                                                                     | Yes      | negative impact include the shaping of zooplanktonic communities and predation pressure (competiton) on other planktonivorous species (Spataru & Gophen 1985)                                                                                                                                                                                                                                                                                                                                                               | High       |
| 11                                             | 3.03 | In the taxon's introduced range, are there known adverse impacts to aquaculture?                                                                                        | No       | it is not known, but possibly the competition with native planktonivorous fish can affect the aquaculture (Spataru & Gophen 1985)                                                                                                                                                                                                                                                                                                                                                                                           | Medium     |
| 12                                             | 3.04 | In the taxon's introduced range, are there known adverse impacts to ecosystem                                                                                           | Yes      | affects native fish fauna via shaping the zooplanktonic organisms                                                                                                                                                                                                                                                                                                                                                                                                                                                           | Medium     |
| 13                                             | 3.05 | In the taxon's introduced range, are there known adverse socio-economic impacts?                                                                                        | No       | It is not known                                                                                                                                                                                                                                                                                                                                                                                                                                                                                                             | Medium     |
| B. Biology/Ecology                             |      |                                                                                                                                                                         |          |                                                                                                                                                                                                                                                                                                                                                                                                                                                                                                                             |            |
| 4. Undesirable (or persistence) traits         |      |                                                                                                                                                                         |          |                                                                                                                                                                                                                                                                                                                                                                                                                                                                                                                             |            |
| 14                                             | 4.01 | Is it likely that the taxon will be poisonous or pose other risks to human health?                                                                                      | No       | Not poisonous                                                                                                                                                                                                                                                                                                                                                                                                                                                                                                               | Very high  |
| 15                                             | 4.02 | Is it likely that the taxon will smother one or more native taxa (that are not threatened or protected)?                                                                | Yes      | They have ability to fine filter the water and also they grow very fast and can form dence populations, they are versatile in terms of feeding and this can often lead to habitat alterations amd disruption of food webs and nutrient cycles in new invaded ecosystems (Milstein et al. 1988; Cooke et al. 2009; Gozlan et al. 2010; Ma et al. 2010; Rosemberg et al. 2010. Such changes as zooplankton and phytoplankton exploatation, shaping the fish communities can affect native fishes populations that are sharing | Medium     |
| 16                                             | 4.03 | Are there any threatened or protected taxa that the non-native taxon would parasitise in the RA area?                                                                   | No       | Does not parasite                                                                                                                                                                                                                                                                                                                                                                                                                                                                                                           | Very high  |
| 17                                             | 4.04 | Is the taxon adaptable in terms of climatic and other environmental conditions, thus enhancing its potential persistence if it has invaded or could invade the RA area? | Yes      | yes foe example, in India and Bangladesh                                                                                                                                                                                                                                                                                                                                                                                                                                                                                    | High       |
| 18                                             | 4.05 | Is the taxon likely to disrupt food-web structure/function in aquatic ecosystems if it has invaded or is likely to invade the RA area?                                  | Yes      | They have ability to fine filter the water and also they grow very fast and can form dence populations, they are versatile in terms of feeding and this can often lead to habitat alterations amd disruption of food webs and nutrient cycles in new invaded ecosystems (Milstein et al. 1988; Cooke et al. 2009; Gozlan et al. 2010; Ma et al. 2010; Rosemberg et al. 2010.                                                                                                                                                | High       |
| 19                                             | 4.06 | Is the taxon likely to exert adverse impacts on ecosystem services in the RA area?                                                                                      | Yes      | it is possible, however, it should be mentioned that they are not known to be independently reproducing in RA                                                                                                                                                                                                                                                                                                                                                                                                               | Medium     |
| 20                                             | 4.07 | Is it likely that the taxon will host, and/or act as a vector for, recognised pests and infectious agents that are endemic in the RA                                    | Yes      | Possible, but not documented                                                                                                                                                                                                                                                                                                                                                                                                                                                                                                | Medium     |

|                                 |      |                                                                                                                                                                              |     |                                                                                                                                                                                                                                                                                                                                                                              |           |
|---------------------------------|------|------------------------------------------------------------------------------------------------------------------------------------------------------------------------------|-----|------------------------------------------------------------------------------------------------------------------------------------------------------------------------------------------------------------------------------------------------------------------------------------------------------------------------------------------------------------------------------|-----------|
| 21                              | 4.08 | Is it likely that the taxon will host, and/or act as a vector for, recognised pests and infectious agents that are absent from (novel to) the RA area?                       | Yes | it is possible. However, it is not documented.                                                                                                                                                                                                                                                                                                                               | High      |
| 22                              | 4.09 | Is it likely that the taxon will achieve a body size that will make it more likely to be released from captivity?                                                            | Yes | yes                                                                                                                                                                                                                                                                                                                                                                          | Very high |
| 23                              | 4.10 | Is the taxon capable of sustaining itself in a range of water velocity conditions (e.g. versatile in habitat use)?                                                           | Yes | in their natural habitat they migrate upstreams for reproduction.                                                                                                                                                                                                                                                                                                            | Medium    |
| 24                              | 4.11 | Is it likely that the taxon's mode of existence (e.g. excretion of by-products) or behaviours (e.g. feeding) will reduce habitat quality for native taxa?                    | Yes | They have ability to fine filter the water and also they grow very fast and can form dense populations, they are versatile in terms of feeding and this can often lead to habitat alterations and disruption of food webs and nutrient cycles in new invaded ecosystems (Milstein et al. 1988; Cooke et al. 2009; Gozlan et al. 2010; Ma et al. 2010; Rosemberg et al. 2010) | High      |
| 25                              | 4.12 | Is the taxon likely to maintain a viable population even when present in low densities (or persisting in adverse conditions by way of a dormant form)?                       | Yes | depending on the water and weather conditions                                                                                                                                                                                                                                                                                                                                | Medium    |
| <b>5. Resource exploitation</b> |      |                                                                                                                                                                              |     |                                                                                                                                                                                                                                                                                                                                                                              |           |
| 26                              | 5.01 | Is the taxon likely to consume threatened or protected native taxa in the RA area?                                                                                           | No  | It is not known                                                                                                                                                                                                                                                                                                                                                              | Low       |
| 27                              | 5.02 | Is the taxon likely to sequester food resources (including nutrients) to the detriment of native taxa in the RA area?                                                        | Yes | Yes it is possible                                                                                                                                                                                                                                                                                                                                                           | High      |
| <b>6. Reproduction</b>          |      |                                                                                                                                                                              |     |                                                                                                                                                                                                                                                                                                                                                                              |           |
| 28                              | 6.01 | Is the taxon likely to exhibit parental care and/or to reduce age-at-maturity in response to environmental conditions?                                                       | No  | No information available                                                                                                                                                                                                                                                                                                                                                     | Very high |
| 29                              | 6.02 | Is the taxon likely to produce viable gametes or propagules (in the RA area)?                                                                                                | No  | As far as it is known, No.                                                                                                                                                                                                                                                                                                                                                   | Very high |
| 30                              | 6.03 | Is the taxon likely to hybridise naturally with native taxa?                                                                                                                 | No  | No information available                                                                                                                                                                                                                                                                                                                                                     | Very high |
| 31                              | 6.04 | Is the taxon likely to be hermaphroditic or to display asexual reproduction?                                                                                                 | No  | No. Does not display asexual reproduction                                                                                                                                                                                                                                                                                                                                    | Very high |
| 32                              | 6.05 | Is the taxon dependent on the presence of another taxon (or specific habitat features) to complete its life cycle?                                                           | No  | No. See: <a href="https://www.fishbase.de/summary/Hypophthalmichthys-molitorix.html">https://www.fishbase.de/summary/Hypophthalmichthys-molitorix.html</a>                                                                                                                                                                                                                   | Very high |
| 33                              | 6.06 | Is the taxon known (or likely) to produce a large number of propagules or offspring within a short time span (e.g. < 1 year)?                                                | Yes | females lay 500 000 eggs in one or several seasons depending on conditions                                                                                                                                                                                                                                                                                                   | Very high |
| 34                              | 6.07 | How many time units (days, months, years) does the taxon require to reach the age-at-first-reproduction?                                                                     | 4   | 4-5 years                                                                                                                                                                                                                                                                                                                                                                    | Very high |
| <b>7. Dispersal mechanisms</b>  |      |                                                                                                                                                                              |     |                                                                                                                                                                                                                                                                                                                                                                              |           |
| 35                              | 7.01 | How many potential internal vectors/pathways could the taxon use to disperse within the RA area (with suitable protected areas (e.g. MCZ, MPA, SSSI)?                        | >1  | Aquaculture and recreational fisheries                                                                                                                                                                                                                                                                                                                                       | Very high |
| 36                              | 7.02 | Will any of these vectors/pathways bring the taxon in close proximity to one or more protected areas (e.g. MCZ, MPA, SSSI)?                                                  | Yes | Yes. it is possible                                                                                                                                                                                                                                                                                                                                                          | High      |
| 37                              | 7.03 | Does the taxon have a means of actively attaching itself to hard substrata (e.g. ship hulls, pilings, buoys) such that it enhances the likelihood of dispersal?              | No  | No. Morphologically this species does not have a means of actively attaching itself to hard substrata                                                                                                                                                                                                                                                                        | Very high |
| 38                              | 7.04 | Is natural dispersal of the taxon likely to occur as eggs (for animals) or as propagules (for plants: seeds, spores) in the RA area?                                         | No  | No. Because does not reproduce in RA                                                                                                                                                                                                                                                                                                                                         | Very high |
| 39                              | 7.05 | Is natural dispersal of the taxon likely to occur as larvae/juveniles (for animals) or as fragments/seedlings (for plants) in the RA area?                                   | No  | They do not produce viable gametes and therefore can be distributed by larvae, or juveniles.                                                                                                                                                                                                                                                                                 | Very high |
| 40                              | 7.06 | Are older life stages of the taxon likely to migrate in the RA area for reproduction?                                                                                        | No  | Do not reproduce therefore, does not migrate.                                                                                                                                                                                                                                                                                                                                | Very high |
| 41                              | 7.07 | Are propagules or eggs of the taxon likely to be dispersed in the RA area by other animals?                                                                                  | No  | No. Can not be dispersed by other animals                                                                                                                                                                                                                                                                                                                                    | Very high |
| 42                              | 7.08 | Is dispersal of the taxon along any of the vectors/pathways mentioned in the previous seven questions (35-41; i.e. both unintentional or intentional) likely to be           | Yes | Yes, It seems to be rapid                                                                                                                                                                                                                                                                                                                                                    | Very high |
| 43                              | 7.09 | Is dispersal of the taxon density dependent?                                                                                                                                 | Yes | Yes, it is possible.                                                                                                                                                                                                                                                                                                                                                         | Medium    |
| <b>8. Tolerance attributes</b>  |      |                                                                                                                                                                              |     |                                                                                                                                                                                                                                                                                                                                                                              |           |
| 44                              | 8.01 | Is the taxon able to withstand being out of water for extended periods (e.g. minimum of one or more hours) at some stage of its life cycle?                                  | No  | No information                                                                                                                                                                                                                                                                                                                                                               | Low       |
| 45                              | 8.02 | Is the taxon tolerant of a wide range of water quality conditions relevant to that taxon? [In the Justification field, indicate the relevant water quality variable(s) being | Yes | "Tolerant of a wide range of temperatures from 0° to 38°C, and salinities to as much as 10 ppt and oxygen levels down to 0.5 ppm." <a href="https://www.fishbase.se/summary/Ctenopharyngodon-idella.html">https://www.fishbase.se/summary/Ctenopharyngodon-idella.html</a>                                                                                                   | High      |
| 46                              | 8.03 | Can the taxon be controlled or eradicated in the wild with chemical, biological, or other agents/means?                                                                      | Yes | yes it can be                                                                                                                                                                                                                                                                                                                                                                | Medium    |

|                          |      |                                                                                                                                                              |           |                                                                                                                                                                                                                                                      |           |
|--------------------------|------|--------------------------------------------------------------------------------------------------------------------------------------------------------------|-----------|------------------------------------------------------------------------------------------------------------------------------------------------------------------------------------------------------------------------------------------------------|-----------|
| 47                       | 8.04 | Is the taxon likely to tolerate or benefit from environmental/human disturbance?                                                                             | No        | No information. probably not.                                                                                                                                                                                                                        | Low       |
| 48                       | 8.05 | Is the taxon able to tolerate salinity levels that are higher or lower than those found in its usual environment?                                            | No        | no, it can maximum tolerate salinity levels up to 7‰.                                                                                                                                                                                                | Very high |
| 49                       | 8.06 | Are there effective natural enemies (predators) of the taxon present in the RA                                                                               | No        | No. No effective natural enemies present in RA area                                                                                                                                                                                                  | High      |
| <b>C. Climate change</b> |      |                                                                                                                                                              |           |                                                                                                                                                                                                                                                      |           |
| <b>9. Climate change</b> |      |                                                                                                                                                              |           |                                                                                                                                                                                                                                                      |           |
| 50                       | 9.01 | Under the predicted future climatic conditions, are the risks of entry into the RA area posed by the taxon likely to increase, decrease or not change?       | Increase  | It was hypothesized that climate change might alert the mechanisms of transportation and introduction of non-native species. Commercial and recreational activities will increase, that itself increases the propagule pressure levels of non-native | Very high |
| 51                       | 9.02 | Under the predicted future climatic conditions, are the risks of establishment posed by the taxon likely to increase, decrease or not change?                | Increase  | if the temperatures increase, it will make their populations able to reproduce independently, therefore the risk of their potential impact is increasing                                                                                             | High      |
| 52                       | 9.03 | Under the predicted future climatic conditions, are the risks of dispersal within the RA area posed by the taxon likely to increase, decrease or not change? | Increase  | Dispersal might increase                                                                                                                                                                                                                             | High      |
| 53                       | 9.04 | Under the predicted future climatic conditions, what is the likely magnitude of future potential impacts on biodiversity and/or ecological integrity/status? | Higher    | It could be higher. Because it is known that they create dense populations when they reproduce in new environments and creating problems for the native species                                                                                      | High      |
| 54                       | 9.05 | Under the predicted future climatic conditions, what is the likely magnitude of future potential impacts on ecosystem structure and/or function?             | Higher    | The magnitude of future potential impact on ecosystem structure and function is increasing                                                                                                                                                           | High      |
| 55                       | 9.06 | Under the predicted future climatic conditions, what is the likely magnitude of future potential impacts on ecosystem services/socio-economic factors?       | No change | No Change                                                                                                                                                                                                                                            | High      |

| Statistics                                     |             |
|------------------------------------------------|-------------|
| Scores                                         |             |
| <b>BRA</b>                                     | <b>24.0</b> |
| <b>BRA Outcome</b>                             | <b>-</b>    |
| <b>BRA+CCA</b>                                 | <b>34.0</b> |
| <b>BRA+CCA Outcome</b>                         | <b>-</b>    |
| Score partition                                |             |
| <b>A. Biogeography/Historical</b>              | <b>16.0</b> |
| 1. Domestication/Cultivation                   | 4.0         |
| 2. Climate, distribution and introduction risk | 2.0         |
| 3. Invasive elsewhere                          | 10.0        |
| <b>B. Biology/Ecology</b>                      | <b>8.0</b>  |
| 4. Undesirable (or persistence) traits         | 10.0        |
| 5. Resource exploitation                       | 2.0         |
| 6. Reproduction                                | -1.0        |
| 7. Dispersal mechanisms                        | -1.0        |
| 8. Tolerance attributes                        | -2.0        |
| <b>C. Climate change</b>                       | <b>10.0</b> |
| 9. Climate change                              | 10.0        |
| Answered Questions                             |             |
| <b>Total</b>                                   | <b>55</b>   |
| <b>A. Biogeography/Historical</b>              | <b>13</b>   |
| 1. Domestication/Cultivation                   | 3           |
| 2. Climate, distribution and introduction risk | 5           |
| 3. Invasive elsewhere                          | 5           |
| <b>B. Biology/Ecology</b>                      | <b>36</b>   |
| 4. Undesirable (or persistence) traits         | 12          |
| 5. Resource exploitation                       | 2           |
| 6. Reproduction                                | 7           |
| 7. Dispersal mechanisms                        | 9           |
| 8. Tolerance attributes                        | 6           |
| <b>C. Climate change</b>                       | <b>6</b>    |
| 9. Climate change                              | 6           |
| Sectors affected                               |             |
| <b>Commercial</b>                              | <b>11</b>   |
| <b>Environmental</b>                           | <b>12</b>   |
| <b>Species or population nuisance traits</b>   | <b>16</b>   |

| Thresholds     |             |
|----------------|-------------|
| <b>BRA</b>     | <b>-</b>    |
| <b>BRA+CCA</b> | <b>-</b>    |
| Confidence     |             |
| <b>BRA+CCA</b> | <b>0.78</b> |
| <b>BRA</b>     | <b>0.78</b> |
| <b>CCA</b>     | <b>0.79</b> |

| Date and Time       |  |
|---------------------|--|
| 21/05/2022 14:19:36 |  |

AS-ISK v2

| Taxon and Assessor details         |                                                                                             |
|------------------------------------|---------------------------------------------------------------------------------------------|
| Category                           | Fishes and Lampreys (freshwater)                                                            |
| Taxon name                         | <i>Hypophthalmichthys nobilis</i>                                                           |
| Common name                        | bighead carp                                                                                |
| Assessor                           | Bella Japoshvili                                                                            |
| Risk screening context             |                                                                                             |
| Reason and socio-economic benefits | Is regularly stocked in South Caucasus                                                      |
| Risk assessment area               | South Caucasus                                                                              |
| Taxonomy                           | Actinopteri (ray-finned fishes) > Cypriniformes (Carps) > Xenocypridae (East Asian minnows) |
| Native range                       | China                                                                                       |
| Introduced range                   | Worldwide                                                                                   |
| URL                                |                                                                                             |

|                                                |      |                                                                                                                                                                         | Response | Justification (references and/or other information)                                                                                                                                                                                                                                          | Confidence |
|------------------------------------------------|------|-------------------------------------------------------------------------------------------------------------------------------------------------------------------------|----------|----------------------------------------------------------------------------------------------------------------------------------------------------------------------------------------------------------------------------------------------------------------------------------------------|------------|
| A. Biogeography/Historical                     |      |                                                                                                                                                                         |          |                                                                                                                                                                                                                                                                                              |            |
| 1. Domestication/Cultivation                   |      |                                                                                                                                                                         |          |                                                                                                                                                                                                                                                                                              |            |
| 1                                              | 1.01 | Has the taxon been the subject of domestication (or cultivation) for at least 20 generations?                                                                           | Yes      | e.g. Tave, D. (1993). Growth of triploid and diploid bighead carp, <i>Hypophthalmichthys nobilis</i> . Journal of Applied Aquaculture, 2(2), 13-26.                                                                                                                                          | Very high  |
| 2                                              | 1.02 | Is the taxon harvested in the wild and likely to be sold or used in its live form?                                                                                      | Yes      | The Species is usually harvested and sold in its live form in native areas as well as from aquaculture                                                                                                                                                                                       | Very high  |
| 3                                              | 1.03 | Does the taxon have invasive races, varieties, sub-taxa or congeners?                                                                                                   | Yes      | Congeners                                                                                                                                                                                                                                                                                    | Very high  |
| 2. Climate, distribution and introduction risk |      |                                                                                                                                                                         |          |                                                                                                                                                                                                                                                                                              |            |
| 4                                              | 2.01 | How similar are the climatic conditions of the Risk Assessment (RA) area and the taxon's native range?                                                                  | High     | Result climatch algorithm                                                                                                                                                                                                                                                                    | Medium     |
| 5                                              | 2.02 | What is the quality of the climate matching data?                                                                                                                       | Low      | Due to low accuracy of local climate data                                                                                                                                                                                                                                                    | High       |
| 6                                              | 2.03 | Is the taxon already present outside of captivity in the RA area?                                                                                                       | No       | Not such an evidence exist                                                                                                                                                                                                                                                                   | Medium     |
| 7                                              | 2.04 | How many potential vectors could the taxon use to enter in the RA area?                                                                                                 | One      | Aquacultural purpose                                                                                                                                                                                                                                                                         | High       |
| 8                                              | 2.05 | Is the taxon currently found in close proximity to, and likely to enter into, the RA area in the near future (e.g. unintentional and intentional introductions)?        | No       | No such an evidence exists                                                                                                                                                                                                                                                                   | High       |
| 3. Invasive elsewhere                          |      |                                                                                                                                                                         |          |                                                                                                                                                                                                                                                                                              |            |
| 9                                              | 3.01 | Has the taxon become naturalised (established viable populations) outside its native range?                                                                             | Yes      | CABI, 2021. <i>Hypophthalmichthys nobilis</i> (Bighead carp). <a href="https://www.cabi.org/isc/datasheet/92426">https://www.cabi.org/isc/datasheet/92426</a> (accessed septemembr 2021); Kottelat, M., & Freyhof, J. (2007). Handbook of European freshwater fishes. Publications Kottelat. | Very high  |
| 10                                             | 3.02 | In the taxon's introduced range, are there known adverse impacts to wild stocks or commercial taxa?                                                                     | Yes      | No documented evdience, only expected                                                                                                                                                                                                                                                        | Low        |
| 11                                             | 3.03 | In the taxon's introduced range, are there known adverse impacts to aquaculture?                                                                                        | No       | No documented evdience exist                                                                                                                                                                                                                                                                 | Low        |
| 12                                             | 3.04 | In the taxon's introduced range, are there known adverse impacts to ecosystem                                                                                           | Yes      | No documented evdience exist, only expected                                                                                                                                                                                                                                                  | Low        |
| 13                                             | 3.05 | In the taxon's introduced range, are there known adverse socio-economic impacts?                                                                                        | Yes      | Welcomme, R.L., 1988. International introductions of inland aquatic species. FAO Fish. Tech. Pap. 294. 318 p.                                                                                                                                                                                | Medium     |
| B. Biology/Ecology                             |      |                                                                                                                                                                         |          |                                                                                                                                                                                                                                                                                              |            |
| 4. Undesirable (or persistence) traits         |      |                                                                                                                                                                         |          |                                                                                                                                                                                                                                                                                              |            |
| 14                                             | 4.01 | Is it likely that the taxon will be poisonous or pose other risks to human health?                                                                                      | No       | Not a harmful species                                                                                                                                                                                                                                                                        | Very high  |
| 15                                             | 4.02 | Is it likely that the taxon will smother one or more native taxa (that are not threatened or protected)?                                                                | No       | No documented evdience exist                                                                                                                                                                                                                                                                 | Low        |
| 16                                             | 4.03 | Are there any threatened or protected taxa that the non-native taxon would parasitise in the RA area?                                                                   | No       | Not a parasite species                                                                                                                                                                                                                                                                       | Very high  |
| 17                                             | 4.04 | Is the taxon adaptable in terms of climatic and other environmental conditions, thus enhancing its potential persistence if it has invaded or could invade the RA area? | Yes      | Based on its invasion history - CABI, 2021. <i>Hypophthalmichthys nobilis</i> (Bighead carp). <a href="https://www.cabi.org/isc/datasheet/92426">https://www.cabi.org/isc/datasheet/92426</a> (accessed septemembr 2021)                                                                     | Low        |
| 18                                             | 4.05 | Is the taxon likely to disrupt food-web structure/function in aquatic ecosystems if it has invaded or is likely to invade the RA                                        | No       | No documented evdience exist                                                                                                                                                                                                                                                                 | Low        |
| 19                                             | 4.06 | Is the taxon likely to exert adverse impacts on ecosystem services in the RA area?                                                                                      | No       | Not expected - CABI, 2021. <i>Hypophthalmichthys nobilis</i> (Bighead carp). <a href="https://www.cabi.org/isc/datasheet/92426">https://www.cabi.org/isc/datasheet/92426</a> (accessed septemembr 2021)                                                                                      | Low        |
| 20                                             | 4.07 | Is it likely that the taxon will host, and/or act as a vector for, recognised pests and infectious agents that are endemic in the RA                                    | No       | Not expected and no documented evdience exist                                                                                                                                                                                                                                                | Medium     |
| 21                                             | 4.08 | Is it likely that the taxon will host, and/or act as a vector for, recognised pests and infectious agents that are absent from (novel to) the RA area?                  | Yes      | Expected but no documented evdience exist                                                                                                                                                                                                                                                    | Low        |
| 22                                             | 4.09 | Is it likely that the taxon will achieve a body size that will make it more likely to be released from captivity?                                                       | Yes      | Kottelat, M., & Freyhof, J. (2007). Handbook of European freshwater fishes. Publications Kottelat.                                                                                                                                                                                           | Very high  |

|                                 |      |                                                                                                                                                                              |     |                                                                                                                                                                                                                                                                                                    |           |
|---------------------------------|------|------------------------------------------------------------------------------------------------------------------------------------------------------------------------------|-----|----------------------------------------------------------------------------------------------------------------------------------------------------------------------------------------------------------------------------------------------------------------------------------------------------|-----------|
| 23                              | 4.10 | Is the taxon capable of sustaining itself in a range of water velocity conditions (e.g. versatile in habitat use)?                                                           | Yes | Kottelat, M., & Freyhof, J. (2007). Handbook of European freshwater fishes. Publications Kottelat.                                                                                                                                                                                                 | High      |
| 24                              | 4.11 | Is it likely that the taxon's mode of existence (e.g. excretion of by-products) or behaviours (e.g. feeding) will reduce habitat quality for native taxa?                    | No  | Not expected - CABI, 2021. Hypophthalmichthys nobilis (Bighead carp). <a href="https://www.cabi.org/isc/datasheet/92426">https://www.cabi.org/isc/datasheet/92426</a> (accessed septemebr 2021)                                                                                                    | Low       |
| 25                              | 4.12 | Is the taxon likely to maintain a viable population even when present in low densities (or persisting in adverse conditions by way of a dormant form)?                       | No  | No documented evidence exist                                                                                                                                                                                                                                                                       | Low       |
| <b>5. Resource exploitation</b> |      |                                                                                                                                                                              |     |                                                                                                                                                                                                                                                                                                    |           |
| 26                              | 5.01 | Is the taxon likely to consume threatened or protected native taxa in the RA area?                                                                                           | No  | Not expected                                                                                                                                                                                                                                                                                       | Medium    |
| 27                              | 5.02 | Is the taxon likely to sequester food resources (including nutrients) to the detriment of native taxa in the RA area?                                                        | Yes | Based on professional judgement, no repsective evidence exists                                                                                                                                                                                                                                     | Medium    |
| <b>6. Reproduction</b>          |      |                                                                                                                                                                              |     |                                                                                                                                                                                                                                                                                                    |           |
| 28                              | 6.01 | Is the taxon likely to exhibit parental care and/or to reduce age-at-maturity in response to environmental conditions?                                                       | No  | Kottelat, M., & Freyhof, J. (2007). Handbook of European freshwater fishes. Publications Kottelat.                                                                                                                                                                                                 | Very high |
| 29                              | 6.02 | Is the taxon likely to produce viable gametes or propagules (in the RA area)?                                                                                                | No  | Kuljanishvili, T., Mumladze, L., Japoshvili, B., Mustafayev, N., Ibrahimov, S., Patoka, J., ... & Kalous, L. (2021). The first unified inventory of non-native fishes of the South Caucasian countries, Armenia, Azerbaijan, and Georgia. Knowledge & Management of Aquatic Ecosystems, (422), 32. | Very high |
| 30                              | 6.03 | Is the taxon likely to hybridise naturally with native taxa?                                                                                                                 | No  | Not expected                                                                                                                                                                                                                                                                                       | Medium    |
| 31                              | 6.04 | Is the taxon likely to be hermaphroditic or to display asexual reproduction?                                                                                                 | No  | Usually reproducing sexually                                                                                                                                                                                                                                                                       | Medium    |
| 32                              | 6.05 | Is the taxon dependent on the presence of another taxon (or specific habitat features) to complete its life cycle?                                                           | No  | Species can complete its lifecycle without any other species                                                                                                                                                                                                                                       | Very high |
| 33                              | 6.06 | Is the taxon known (or likely) to produce a large number of propagules or offspring within a short time span (e.g. < 1 year)?                                                | Yes | Kottelat, M., & Freyhof, J. (2007). Handbook of European freshwater fishes. Publications Kottelat.                                                                                                                                                                                                 | Very high |
| 34                              | 6.07 | How many time units (days, months, years) does the taxon require to reach the age-at-first-reproduction?                                                                     | 5   | Years                                                                                                                                                                                                                                                                                              | High      |
| <b>7. Dispersal mechanisms</b>  |      |                                                                                                                                                                              |     |                                                                                                                                                                                                                                                                                                    |           |
| 35                              | 7.01 | How many potential internal vectors/pathways could the taxon use to disperse within the RA area (with suitable)                                                              | > 1 | Species is intentionally introduced to water bodies for recreational prpurposes while its suveniles can also unintentionally be spread as a hitchhiker                                                                                                                                             | Medium    |
| 36                              | 7.02 | Will any of these vectors/pathways bring the taxon in close proximity to one or more protected areas (e.g. MCZ, MPA, SSSI)?                                                  | Yes | Because of large number of eggs/juveniles produced that are able to cover lareg distace through water curretns                                                                                                                                                                                     | Medium    |
| 37                              | 7.03 | Does the taxon have a means of actively attaching itself to hard substrata (e.g. ship hulls, pilings, buoys) such that it enhances the likelihood of dispersal?              | No  | No such an evidence exists                                                                                                                                                                                                                                                                         | Very high |
| 38                              | 7.04 | Is natural dispersal of the taxon likely to occur as eggs (for animals) or as propagules (for plants: seeds, spores) in the RA area?                                         | Yes | Kottelat, M., & Freyhof, J. (2007). Handbook of European freshwater fishes. Publications Kottelat.                                                                                                                                                                                                 | Very high |
| 39                              | 7.05 | Is natural dispersal of the taxon likely to occur as larvae/juveniles (for animals) or as fragments/seedlings (for plants) in the RA area?                                   | Yes | Eggs are free floating and juveniles also drifting through water currents                                                                                                                                                                                                                          | High      |
| 40                              | 7.06 | Are older life stages of the taxon likely to migrate in the RA area for reproduction?                                                                                        | No  | No such an evidence exists                                                                                                                                                                                                                                                                         | High      |
| 41                              | 7.07 | Are propagules or eggs of the taxon likely to be dispersed in the RA area by other animals?                                                                                  | No  | No such an evidence exists                                                                                                                                                                                                                                                                         | Very high |
| 42                              | 7.08 | Is dispersal of the taxon along any of the vectors/pathways mentioned in the previous seven questions (35-41; i.e. both unintentional or intentional) likely to be           | Yes | Due to a large number of eggs produced that are freely floating through water cuurents                                                                                                                                                                                                             | Very high |
| 43                              | 7.09 | Is dispersal of the taxon density dependent?                                                                                                                                 | No  | No relevant information is available                                                                                                                                                                                                                                                               | Low       |
| <b>8. Tolerance attributes</b>  |      |                                                                                                                                                                              |     |                                                                                                                                                                                                                                                                                                    |           |
| 44                              | 8.01 | Is the taxon able to withstand being out of water for extended periods (e.g. minimum of one or more hours) at some stage of its life cycle?                                  | No  | Not expected and no such an evidence exists                                                                                                                                                                                                                                                        | High      |
| 45                              | 8.02 | Is the taxon tolerant of a wide range of water quality conditions relevant to that taxon? [In the Justification field, indicate the relevant water quality variable(s) being | Yes | Kottelat, M., & Freyhof, J. (2007). Handbook of European freshwater fishes. Publications Kottelat.                                                                                                                                                                                                 | High      |
| 46                              | 8.03 | Can the taxon be controlled or eradicated in the wild with chemical, biological, or other agents/means?                                                                      | No  | No such an evidence exists                                                                                                                                                                                                                                                                         | Medium    |
| 47                              | 8.04 | Is the taxon likely to tolerate or benefit from environmental/human disturbance?                                                                                             | No  | No such an evidence exists                                                                                                                                                                                                                                                                         | Medium    |
| 48                              | 8.05 | Is the taxon able to tolerate salinity levels that are higher or lower than those found in its usual environment?                                                            | Yes | Kottelat, M., & Freyhof, J. (2007). Handbook of European freshwater fishes. Publications Kottelat.                                                                                                                                                                                                 | High      |
| 49                              | 8.06 | Are there effective natural enemies (predators) of the taxon present in the RA                                                                                               | No  | No such an evidence exists                                                                                                                                                                                                                                                                         | Low       |

| C. Climate change |      |                                                                                                                                                              |           |                                 |        |
|-------------------|------|--------------------------------------------------------------------------------------------------------------------------------------------------------------|-----------|---------------------------------|--------|
| 9. Climate change |      |                                                                                                                                                              |           |                                 |        |
| 50                | 9.01 | Under the predicted future climatic conditions, are the risks of entry into the RA area posed by the taxon likely to increase, decrease or not change?       | No change | Based on professional judgement | Medium |
| 51                | 9.02 | Under the predicted future climatic conditions, are the risks of establishment posed by the taxon likely to increase, decrease or not change?                | Increase  | Based on professional judgement | Medium |
| 52                | 9.03 | Under the predicted future climatic conditions, are the risks of dispersal within the RA area posed by the taxon likely to increase, decrease or not change? | Increase  | Based on professional judgement | Medium |
| 53                | 9.04 | Under the predicted future climatic conditions, what is the likely magnitude of future potential impacts on biodiversity and/or ecological integrity/status? | Higher    | Based on professional judgement | Medium |
| 54                | 9.05 | Under the predicted future climatic conditions, what is the likely magnitude of future potential impacts on ecosystem structure and/or function?             | Higher    | Based on professional judgement | Medium |
| 55                | 9.06 | Under the predicted future climatic conditions, what is the likely magnitude of future potential impacts on ecosystem services/socio-economic factors?       | Higher    | Based on professional judgement | Medium |

| Statistics                                     |      |
|------------------------------------------------|------|
| Scores                                         |      |
| BRA                                            | 28.0 |
| BRA Outcome                                    | -    |
| BRA+CCA                                        | 38.0 |
| BRA+CCA Outcome                                | -    |
| Score partition                                |      |
| A. Biogeography/Historical                     | 18.0 |
| 1. Domestication/Cultivation                   | 4.0  |
| 2. Climate, distribution and introduction risk | 0.0  |
| 3. Invasive elsewhere                          | 14.0 |
| B. Biology/Ecology                             | 10.0 |
| 4. Undesirable (or persistence) traits         | 4.0  |
| 5. Resource exploitation                       | 2.0  |
| 6. Reproduction                                | -1.0 |
| 7. Dispersal mechanisms                        | 2.0  |
| 8. Tolerance attributes                        | 3.0  |
| C. Climate change                              | 10.0 |
| 9. Climate change                              | 10.0 |
| Answered Questions                             |      |
| Total                                          | 55   |
| A. Biogeography/Historical                     | 13   |
| 1. Domestication/Cultivation                   | 3    |
| 2. Climate, distribution and introduction risk | 5    |
| 3. Invasive elsewhere                          | 5    |
| B. Biology/Ecology                             | 36   |
| 4. Undesirable (or persistence) traits         | 12   |
| 5. Resource exploitation                       | 2    |
| 6. Reproduction                                | 7    |
| 7. Dispersal mechanisms                        | 9    |
| 8. Tolerance attributes                        | 6    |
| C. Climate change                              | 6    |
| 9. Climate change                              | 6    |
| Sectors affected                               |      |
| Commercial                                     | 15   |
| Environmental                                  | 9    |
| Species or population nuisance traits          | 17   |

| Thresholds |      |
|------------|------|
| BRA        | -    |
| BRA+CCA    | -    |
| Confidence |      |
| BRA+CCA    | 0.63 |
| BRA        | 0.64 |
| CCA        | 0.50 |

| Date and Time       |
|---------------------|
| 16/05/2022 13:24:54 |



## AS-ISK v2

| Taxon and Assessor details         |                                                                                                      |
|------------------------------------|------------------------------------------------------------------------------------------------------|
| Category                           | Fishes and Lampreys (freshwater)                                                                     |
| Taxon name                         | <i>Hypophthalmichthys nobilis</i>                                                                    |
| Common name                        | bighead carp                                                                                         |
| Assessor                           | Giorgi Epitashvili                                                                                   |
| Risk screening context             |                                                                                                      |
| Reason and socio-economic benefits | H. nobilis has long been cultivated in the world. This species is a good object for pond fishery. It |
| Risk assessment area               | South Caucasus                                                                                       |
| Taxonomy                           | Hypophthalmichthys nobilis (Richardson, 1845)                                                        |
| Native range                       | It is a native freshwater fish in China, with a broad distribution from the drainage areas of the    |
| Introduced range                   | Though it has been introduced into many other countries (mainly Asia and Eastern Europe), very       |
| URL                                | <a href="https://www.fishbase.se/summary/275">https://www.fishbase.se/summary/275</a>                |

|                                                |      | Response                                                                                                                                                                | Justification (references and/or other information) | Confidence                                                                                                                                                                                                                                                                                                                                                                                    |           |
|------------------------------------------------|------|-------------------------------------------------------------------------------------------------------------------------------------------------------------------------|-----------------------------------------------------|-----------------------------------------------------------------------------------------------------------------------------------------------------------------------------------------------------------------------------------------------------------------------------------------------------------------------------------------------------------------------------------------------|-----------|
| A. Biogeography/Historical                     |      |                                                                                                                                                                         |                                                     |                                                                                                                                                                                                                                                                                                                                                                                               |           |
| 1. Domestication/Cultivation                   |      |                                                                                                                                                                         |                                                     |                                                                                                                                                                                                                                                                                                                                                                                               |           |
| 1                                              | 1.01 | Has the taxon been the subject of domestication (or cultivation) for at least 20 generations?                                                                           | Yes                                                 | This species has a trade importance and considered as good object for pond fishery (Ninua et al. 2013).                                                                                                                                                                                                                                                                                       | Very high |
| 2                                              | 1.02 | Is the taxon harvested in the wild and likely to be sold or used in its live form?                                                                                      | Yes                                                 | The broodstock used for artificial propagation is usually raised in captivity with seed from the wild or from breeding stations, where good natural stock are maintained.                                                                                                                                                                                                                     | High      |
| 3                                              | 1.03 | Does the taxon have invasive races, varieties, sub-taxa or congeners?                                                                                                   | Yes                                                 | Several countries report adverse ecological impact after introduction of <i>H. nobilis</i> . This fish is considered as serious invasive species in the USA.                                                                                                                                                                                                                                  | Very high |
| 2. Climate, distribution and introduction risk |      |                                                                                                                                                                         |                                                     |                                                                                                                                                                                                                                                                                                                                                                                               |           |
| 4                                              | 2.01 | How similar are the climatic conditions of the Risk Assessment (RA) area and the taxon's native range?                                                                  | Medium                                              | World Map of the Köppen-Geiger climate classification                                                                                                                                                                                                                                                                                                                                         | Medium    |
| 5                                              | 2.02 | What is the quality of the climate matching data?                                                                                                                       | Medium                                              | World Map of the Köppen-Geiger climate classification                                                                                                                                                                                                                                                                                                                                         | Medium    |
| 6                                              | 2.03 | Is the taxon already present outside of captivity in the RA area?                                                                                                       | Yes                                                 | Own data                                                                                                                                                                                                                                                                                                                                                                                      | Medium    |
| 7                                              | 2.04 | How many potential vectors could the taxon use to enter in the RA area?                                                                                                 | One                                                 | This species is enters in the SC region by humans for aquacultural purposes                                                                                                                                                                                                                                                                                                                   | Medium    |
| 8                                              | 2.05 | Is the taxon currently found in close proximity to, and likely to enter into, the RA area in the near future (e.g. unintentional and intentional introductions)?        | Yes                                                 | This species is acclimatized in the neighbouring countries of the SC region (Iran, Turkey).                                                                                                                                                                                                                                                                                                   | Very high |
| 3. Invasive elsewhere                          |      |                                                                                                                                                                         |                                                     |                                                                                                                                                                                                                                                                                                                                                                                               |           |
| 9                                              | 3.01 | Has the taxon become naturalised (established viable populations) outside its native range?                                                                             | Yes                                                 | As noted by Jennings (1988), there is a lack of specific information on longevity and mortality of naturalized or indigenous populations of Bighead Carp in USA (Kolar et al. 2005).                                                                                                                                                                                                          | High      |
| 10                                             | 3.02 | In the taxon's introduced range, are there known adverse impacts to wild stocks or commercial taxa?                                                                     | Yes                                                 | USGS-NAS (2005) reports that, "Because bighead carp are planktivorous and attain a large size, Laird and Page (1996) suggested these carp have the potential to deplete zooplankton populations. A decline in the availability of plankton can lead to reductions in populations of native species that rely on plankton for food, including all larval fishes, some adult fishes, and native | High      |
| 11                                             | 3.03 | In the taxon's introduced range, are there known adverse impacts to aquaculture?                                                                                        | Yes                                                 | The spread of this species adversely affects commercial fishery in parts of the Mississippi River Basin, USA (Maher 2005).                                                                                                                                                                                                                                                                    | Very high |
| 12                                             | 3.04 | In the taxon's introduced range, are there known adverse impacts to ecosystem                                                                                           | Yes                                                 | Data deficient                                                                                                                                                                                                                                                                                                                                                                                | Medium    |
| 13                                             | 3.05 | In the taxon's introduced range, are there known adverse socio-economic impacts?                                                                                        | Yes                                                 | Hypophthalmichthys nobilis has a high potential socio-economic impact in the Great Lakes, USA.                                                                                                                                                                                                                                                                                                | High      |
| B. Biology/Ecology                             |      |                                                                                                                                                                         |                                                     |                                                                                                                                                                                                                                                                                                                                                                                               |           |
| 4. Undesirable (or persistence) traits         |      |                                                                                                                                                                         |                                                     |                                                                                                                                                                                                                                                                                                                                                                                               |           |
| 14                                             | 4.01 | Is it likely that the taxon will be poisonous or pose other risks to human health?                                                                                      | No                                                  | This species does not pose a threat to humans.                                                                                                                                                                                                                                                                                                                                                | High      |
| 15                                             | 4.02 | Is it likely that the taxon will smother one or more native taxa (that are not threatened or protected)?                                                                | Yes                                                 | Because bighead carp are planktivorous and attain a large size, Laird and Page (1996) suggested these carp have the potential to deplete zooplankton populations. As Laird and Page pointed out, a decline in the availability of plankton can lead to reductions in populations of native species that rely on plankton for food.                                                            | Medium    |
| 16                                             | 4.03 | Are there any threatened or protected taxa that the non-native taxon would parasitise in the RA area?                                                                   | Yes                                                 | There are several protected and threatened species in the SC region which may be affected by this species: e.g. <i>Cyprinus carpio</i> , <i>Luciobarbus capito</i> , etc.                                                                                                                                                                                                                     | Very high |
| 17                                             | 4.04 | Is the taxon adaptable in terms of climatic and other environmental conditions, thus enhancing its potential persistence if it has invaded or could invade the RA area? | No                                                  | This species does not reproduces in the SC region.                                                                                                                                                                                                                                                                                                                                            | Medium    |
| 18                                             | 4.05 | Is the taxon likely to disrupt food-web structure/function in aquatic ecosystems if it has invaded or is likely to invade the RA                                        | Yes                                                 | There is such a risk.                                                                                                                                                                                                                                                                                                                                                                         | High      |
| 19                                             | 4.06 | Is the taxon likely to exert adverse impacts on ecosystem services in the RA area?                                                                                      | No                                                  | Such a risk is unlikely                                                                                                                                                                                                                                                                                                                                                                       | Medium    |
| 20                                             | 4.07 | Is it likely that the taxon will host, and/or act as a vector for, recognised pests and infectious agents that are endemic in the RA                                    | Not applicable                                      | Data deficient                                                                                                                                                                                                                                                                                                                                                                                | Low       |
| 21                                             | 4.08 | Is it likely that the taxon will host, and/or act as a vector for, recognised pests and infectious agents that are absent from (novel to) the RA area?                  | Yes                                                 | Bighead carp are often infected with bacterial and parasitic diseases (Kolar et al. 2005).                                                                                                                                                                                                                                                                                                    | High      |

|                                 |      |                                                                                                                                                                              |                |                                                                                                                                                                                                                                                                                                                                                                                                                           |           |
|---------------------------------|------|------------------------------------------------------------------------------------------------------------------------------------------------------------------------------|----------------|---------------------------------------------------------------------------------------------------------------------------------------------------------------------------------------------------------------------------------------------------------------------------------------------------------------------------------------------------------------------------------------------------------------------------|-----------|
| 22                              | 4.09 | Is it likely that the taxon will achieve a body size that will make it more likely to be released from captivity?                                                            | Yes            | Max length is 146 cm SL male/unsexed; common length : 60.0 cm TL male/unsexed; max. published weight: 40.0 kg. Therefore this fish is good object for fishery.                                                                                                                                                                                                                                                            | Very high |
| 23                              | 4.10 | Is the taxon capable of sustaining itself in a range of water velocity conditions (e.g. versatile in habitat use)?                                                           | Yes            | In its natural environment, it occurs in rivers with marked water-level fluctuations, overwinters in middle and lower stretches.                                                                                                                                                                                                                                                                                          | Medium    |
| 24                              | 4.11 | Is it likely that the taxon's mode of existence (e.g. excretion of by-products) or behaviours (e.g. feeding) will reduce habitat quality for native taxa?                    | Yes            | Adult bighead, silver, and hybrid carp are invasive species of fish that spread quickly once they are established in a water body. These carp damage habitat and reduce water-quality for native fish.                                                                                                                                                                                                                    | Very high |
| 25                              | 4.12 | Is the taxon likely to maintain a viable population even when present in low densities (or persisting in adverse conditions by way of a dormant form)?                       | Yes            | The minimum numbers of bighead and silver carp required to maintain a viable population in the Great Lakes.                                                                                                                                                                                                                                                                                                               | Low       |
| <b>5. Resource exploitation</b> |      |                                                                                                                                                                              |                |                                                                                                                                                                                                                                                                                                                                                                                                                           |           |
| 26                              | 5.01 | Is the taxon likely to consume threatened or protected native taxa in the RA area?                                                                                           | No             | No such fact has been detected.                                                                                                                                                                                                                                                                                                                                                                                           | Medium    |
| 27                              | 5.02 | Is the taxon likely to sequester food resources (including nutrients) to the detriment of native taxa in the RA area?                                                        | Yes            | There is a probability of that.                                                                                                                                                                                                                                                                                                                                                                                           | Medium    |
| <b>6. Reproduction</b>          |      |                                                                                                                                                                              |                |                                                                                                                                                                                                                                                                                                                                                                                                                           |           |
| 28                              | 6.01 | Is the taxon likely to exhibit parental care and/or to reduce age-at-maturity in response to environmental conditions?                                                       | Not applicable | Data deficient                                                                                                                                                                                                                                                                                                                                                                                                            | Low       |
| 29                              | 6.02 | Is the taxon likely to produce viable gametes or propagules (in the RA area)?                                                                                                | No             | This species does not reproduce in the Caucasus region.                                                                                                                                                                                                                                                                                                                                                                   | Very high |
| 30                              | 6.03 | Is the taxon likely to hybridise naturally with native taxa?                                                                                                                 | No             | Data deficient                                                                                                                                                                                                                                                                                                                                                                                                            | Medium    |
| 31                              | 6.04 | Is the taxon likely to be hermaphroditic or to display asexual reproduction?                                                                                                 | Yes            | Bighead and silver carps are successfully maturing and spawning in the Missouri River some reproductive abnormalities such as intersex, atresia, and sterility were observed.                                                                                                                                                                                                                                             | High      |
| 32                              | 6.05 | Is the taxon dependent on the presence of another taxon (or specific habitat features) to complete its life cycle?                                                           | No             | No such data available                                                                                                                                                                                                                                                                                                                                                                                                    | Medium    |
| 33                              | 6.06 | Is the taxon known (or likely) to produce a large number of propagules or offspring within a short time span (e.g. < 1 year)?                                                | No             | This fish sexually matures at the age of 4-7 and fecundity is about 500 000 eggs.                                                                                                                                                                                                                                                                                                                                         | High      |
| 34                              | 6.07 | How many time units (days, months, years) does the taxon require to reach the age-at-first-reproduction?                                                                     | 4              | This fish sexually matures at the age of 4-7 (Ninua et al. 2013).                                                                                                                                                                                                                                                                                                                                                         | Very high |
| <b>7. Dispersal mechanisms</b>  |      |                                                                                                                                                                              |                |                                                                                                                                                                                                                                                                                                                                                                                                                           |           |
| 35                              | 7.01 | How many potential internal vectors/pathways could the taxon use to disperse within the RA area (with suitable protected areas (e.g. MCZ, MPA, SSSI)?                        | One            | This species can only disperse within the SC region by humans.                                                                                                                                                                                                                                                                                                                                                            | Very high |
| 36                              | 7.02 | Will any of these vectors/pathways bring the taxon in close proximity to one or more protected areas (e.g. MCZ, MPA, SSSI)?                                                  | Yes            | There is a probability of that.                                                                                                                                                                                                                                                                                                                                                                                           | Medium    |
| 37                              | 7.03 | Does the taxon have a means of actively attaching itself to hard substrata (e.g. ship hulls, pilings, buoys) such that it enhances the likelihood of dispersal?              | No             | This species does not have such means                                                                                                                                                                                                                                                                                                                                                                                     | High      |
| 38                              | 7.04 | Is natural dispersal of the taxon likely to occur as eggs (for animals) or as propagules (for plants: seeds, spores) in the RA area?                                         | No             | This species does not reproduce in the SC region.                                                                                                                                                                                                                                                                                                                                                                         | High      |
| 39                              | 7.05 | Is natural dispersal of the taxon likely to occur as larvae/juveniles (for animals) or as fragments/seedlings (for plants) in the RA area?                                   | No             | This species does not reproduce in the SC region.                                                                                                                                                                                                                                                                                                                                                                         | High      |
| 40                              | 7.06 | Are older life stages of the taxon likely to migrate in the RA area for reproduction?                                                                                        | No             | This species does not reproduce in the SC region.                                                                                                                                                                                                                                                                                                                                                                         | High      |
| 41                              | 7.07 | Are propagules or eggs of the taxon likely to be dispersed in the RA area by other animals?                                                                                  | No             | No such fact has been detected                                                                                                                                                                                                                                                                                                                                                                                            | High      |
| 42                              | 7.08 | Is dispersal of the taxon along any of the vectors/pathways mentioned in the previous seven questions (35-41; i.e. both unintentional or intentional) likely to be           | Not applicable | Data deficient                                                                                                                                                                                                                                                                                                                                                                                                            | Low       |
| 43                              | 7.09 | Is dispersal of the taxon density dependent?                                                                                                                                 | Yes            | Own judgement                                                                                                                                                                                                                                                                                                                                                                                                             | Low       |
| <b>8. Tolerance attributes</b>  |      |                                                                                                                                                                              |                |                                                                                                                                                                                                                                                                                                                                                                                                                           |           |
| 44                              | 8.01 | Is the taxon able to withstand being out of water for extended periods (e.g. minimum of one or more hours) at some stage of its life cycle?                                  | No             | No such fact has been described.                                                                                                                                                                                                                                                                                                                                                                                          | Medium    |
| 45                              | 8.02 | Is the taxon tolerant of a wide range of water quality conditions relevant to that taxon? [In the Justification field, indicate the relevant water quality variable(s) being | No             | Soft water has been said to cause the bursting of Bighead carp eggs and thus has been suggested as a factor that would limit the spread of this species (Chapman and Deters 2009).                                                                                                                                                                                                                                        | High      |
| 46                              | 8.03 | Can the taxon be controlled or eradicated in the wild with chemical, biological, or other agents/means?                                                                      | Yes            | The toxicity of many chemicals to bighead, grass, and silver carps has been examined (13 chemicals, 34 studies for bighead carp; 75 chemicals, 233 studies for grass carp; 21 chemicals, 83 studies for silver carp; Pesticide Action Network 2005). Rotenone and antimycin are the only registered piscicides available to potentially control Asian carps in the United States without considerable additional expense. | Very high |
| 47                              | 8.04 | Is the taxon likely to tolerate or benefit from environmental/human disturbance?                                                                                             | Yes            | In many countries this species is spread with human help.                                                                                                                                                                                                                                                                                                                                                                 | High      |

|                          |      |                                                                                                                                                              |           |                                                                                                                                                                |        |
|--------------------------|------|--------------------------------------------------------------------------------------------------------------------------------------------------------------|-----------|----------------------------------------------------------------------------------------------------------------------------------------------------------------|--------|
| 48                       | 8.05 | Is the taxon able to tolerate salinity levels that are higher or lower than those found in its usual environment?                                            | Yes       | In aquaculture, adults can survive brackish water (up to 7 ppt) when released into estuaries and coastal lakes.                                                | Low    |
| 49                       | 8.06 | Are there effective natural enemies (predators) of the taxon present in the RA                                                                               | Yes       | There are several predators in the SC region which can control the <i>H. nobilis</i> populations: <i>Esox lucius</i> , <i>Silurus glanis</i> , <i>Squalius</i> | Medium |
| <b>C. Climate change</b> |      |                                                                                                                                                              |           |                                                                                                                                                                |        |
| <b>9. Climate change</b> |      |                                                                                                                                                              |           |                                                                                                                                                                |        |
| 50                       | 9.01 | Under the predicted future climatic conditions, are the risks of entry into the RA area posed by the taxon likely to increase, decrease or not change?       | No change | Own judgement                                                                                                                                                  | Medium |
| 51                       | 9.02 | Under the predicted future climatic conditions, are the risks of establishment posed by the taxon likely to increase, decrease or not change?                | No change | Own judgement                                                                                                                                                  | Medium |
| 52                       | 9.03 | Under the predicted future climatic conditions, are the risks of dispersal within the RA area posed by the taxon likely to increase, decrease or not change? | Decrease  | Own judgement                                                                                                                                                  | Medium |
| 53                       | 9.04 | Under the predicted future climatic conditions, what is the likely magnitude of future potential impacts on biodiversity and/or ecological integrity/status? | No change | Own judgement                                                                                                                                                  | Medium |
| 54                       | 9.05 | Under the predicted future climatic conditions, what is the likely magnitude of future potential impacts on ecosystem structure and/or function?             | Lower     | Own judgement                                                                                                                                                  | Medium |
| 55                       | 9.06 | Under the predicted future climatic conditions, what is the likely magnitude of future potential impacts on ecosystem services/socio-economic factors?       | Lower     | Own judgement                                                                                                                                                  | Medium |

| Statistics                                     |             |
|------------------------------------------------|-------------|
| Scores                                         |             |
| <b>BRA</b>                                     | <b>25.5</b> |
| <b>BRA Outcome</b>                             | <b>-</b>    |
| <b>BRA+CCA</b>                                 | <b>19.5</b> |
| <b>BRA+CCA Outcome</b>                         | <b>-</b>    |
| Score partition                                |             |
| <b>A. Biogeography/Historical</b>              | <b>18.5</b> |
| 1. Domestication/Cultivation                   | 4.0         |
| 2. Climate, distribution and introduction risk | 1.0         |
| 3. Invasive elsewhere                          | 13.5        |
| <b>B. Biology/Ecology</b>                      | <b>7.0</b>  |
| 4. Undesirable (or persistence) traits         | 7.0         |
| 5. Resource exploitation                       | 2.0         |
| 6. Reproduction                                | 0.0         |
| 7. Dispersal mechanisms                        | -3.0        |
| 8. Tolerance attributes                        | 1.0         |
| <b>C. Climate change</b>                       | <b>-6.0</b> |
| 9. Climate change                              | -6.0        |
| Answered Questions                             |             |
| <b>Total</b>                                   | <b>55</b>   |
| <b>A. Biogeography/Historical</b>              | <b>13</b>   |
| 1. Domestication/Cultivation                   | 3           |
| 2. Climate, distribution and introduction risk | 5           |
| 3. Invasive elsewhere                          | 5           |
| <b>B. Biology/Ecology</b>                      | <b>36</b>   |
| 4. Undesirable (or persistence) traits         | 12          |
| 5. Resource exploitation                       | 2           |
| 6. Reproduction                                | 7           |
| 7. Dispersal mechanisms                        | 9           |
| 8. Tolerance attributes                        | 6           |
| <b>C. Climate change</b>                       | <b>6</b>    |
| 9. Climate change                              | 6           |
| Sectors affected                               |             |
| <b>Commercial</b>                              | <b>11</b>   |
| <b>Environmental</b>                           | <b>4</b>    |
| <b>Species or population nuisance traits</b>   | <b>7</b>    |

| Thresholds     |             |
|----------------|-------------|
| <b>BRA</b>     | <b>-</b>    |
| <b>BRA+CCA</b> | <b>-</b>    |
| Confidence     |             |
| <b>BRA+CCA</b> | <b>0.65</b> |
| <b>BRA</b>     | <b>0.66</b> |
| <b>CCA</b>     | <b>0.50</b> |

| Date and Time       |
|---------------------|
| 10/05/2022 17:35:01 |

## AS-ISK v2

| Taxon and Assessor details         |                                                                                                                                               |
|------------------------------------|-----------------------------------------------------------------------------------------------------------------------------------------------|
| Category                           | Fishes and Lampreys (freshwater)                                                                                                              |
| Taxon name                         | <i>Hypophthalmichthys nobilis</i>                                                                                                             |
| Common name                        | bighead carp                                                                                                                                  |
| Assessor                           | Tatia Kuljanishvili                                                                                                                           |
| Risk screening context             |                                                                                                                                               |
| Reason and socio-economic benefits | Introduced for aquaculture and algae control                                                                                                  |
| Risk assessment area               | South Caucasus                                                                                                                                |
| Taxonomy                           | Actinopteri (ray-finned fishes) > Cypriniformes (Carps) > Xenocypridae                                                                        |
| Native range                       | Asia. China                                                                                                                                   |
| Introduced range                   | Worldwide                                                                                                                                     |
| URL                                | <a href="https://www.fishbase.se/summary/Hypophthalmichthys-nobilis.html">https://www.fishbase.se/summary/Hypophthalmichthys-nobilis.html</a> |

|                                                       |      |                                                                                                                                                                         | Response | Justification (references and/or other information)                                                                                                                                                                                                                                                                                                                                                                                                                                                                                                  | Confidence |
|-------------------------------------------------------|------|-------------------------------------------------------------------------------------------------------------------------------------------------------------------------|----------|------------------------------------------------------------------------------------------------------------------------------------------------------------------------------------------------------------------------------------------------------------------------------------------------------------------------------------------------------------------------------------------------------------------------------------------------------------------------------------------------------------------------------------------------------|------------|
| <b>A. Biogeography/Historical</b>                     |      |                                                                                                                                                                         |          |                                                                                                                                                                                                                                                                                                                                                                                                                                                                                                                                                      |            |
| <b>1. Domestication/Cultivation</b>                   |      |                                                                                                                                                                         |          |                                                                                                                                                                                                                                                                                                                                                                                                                                                                                                                                                      |            |
| 1                                                     | 1.01 | Has the taxon been the subject of domestication (or cultivation) for at least 20 generations?                                                                           | Yes      | It has been grown in aquaculture facilities more than 20 generations                                                                                                                                                                                                                                                                                                                                                                                                                                                                                 | Very high  |
| 2                                                     | 1.02 | Is the taxon harvested in the wild and likely to be sold or used in its live form?                                                                                      | Yes      | Yes. Taxon is harvested in wild and is sold in its live form                                                                                                                                                                                                                                                                                                                                                                                                                                                                                         | Very high  |
| 3                                                     | 1.03 | Does the taxon have invasive races, varieties, sub-taxa or congeners?                                                                                                   | Yes      | for example <i>Hypophthalmichthys molitrix</i> and <i>Ctenopharyngodon idella</i>                                                                                                                                                                                                                                                                                                                                                                                                                                                                    | High       |
| <b>2. Climate, distribution and introduction risk</b> |      |                                                                                                                                                                         |          |                                                                                                                                                                                                                                                                                                                                                                                                                                                                                                                                                      |            |
| 4                                                     | 2.01 | How similar are the climatic conditions of the Risk Assessment (RA) area and the taxon's native range?                                                                  | High     | The climate is more or less similar out of 19 stations, 15 match at value 9 (out of 10).                                                                                                                                                                                                                                                                                                                                                                                                                                                             | Medium     |
| 5                                                     | 2.02 | What is the quality of the climate matching data?                                                                                                                       | Medium   | Climatch data is medium since there are not much station on the RA area                                                                                                                                                                                                                                                                                                                                                                                                                                                                              | High       |
| 6                                                     | 2.03 | Is the taxon already present outside of captivity in the RA area?                                                                                                       | Yes      | This species is released in ponds and rivers in RA area                                                                                                                                                                                                                                                                                                                                                                                                                                                                                              | Very high  |
| 7                                                     | 2.04 | How many potential vectors could the taxon use to enter in the RA area?                                                                                                 | >1       | Aquaculture, recreational fisheries                                                                                                                                                                                                                                                                                                                                                                                                                                                                                                                  | High       |
| 8                                                     | 2.05 | Is the taxon currently found in close proximity to, and likely to enter into, the RA area in the near future (e.g. unintentional and intentional introductions)?        | Yes      | This species is released in ponds and rivers in RA area                                                                                                                                                                                                                                                                                                                                                                                                                                                                                              | Very high  |
| <b>3. Invasive elsewhere</b>                          |      |                                                                                                                                                                         |          |                                                                                                                                                                                                                                                                                                                                                                                                                                                                                                                                                      |            |
| 9                                                     | 3.01 | Has the taxon become naturalised (established viable populations) outside its                                                                                           | Yes      | Yes. has become naturalised for example in Taiwan (Thang 1960).                                                                                                                                                                                                                                                                                                                                                                                                                                                                                      | High       |
| 10                                                    | 3.02 | In the taxon's introduced range, are there known adverse impacts to wild stocks or commercial taxa?                                                                     | Yes      | negative impact include the shaping of zooplanktonic communities and predation pressure (competition) on other planktonivorous species (Spataru & Gophen 1985)                                                                                                                                                                                                                                                                                                                                                                                       | High       |
| 11                                                    | 3.03 | In the taxon's introduced range, are there known adverse impacts to aquaculture?                                                                                        | Yes      | It is not known, but possibly the competition with native planktonivorous fish can affect the aquaculture                                                                                                                                                                                                                                                                                                                                                                                                                                            | Medium     |
| 12                                                    | 3.04 | In the taxon's introduced range, are there known adverse impacts to ecosystem                                                                                           | Yes      | affects native fish fauna via shaping the zooplanktonic organisms                                                                                                                                                                                                                                                                                                                                                                                                                                                                                    | Medium     |
| 13                                                    | 3.05 | In the taxon's introduced range, are there known adverse socio-economic impacts?                                                                                        | No       | it is not known                                                                                                                                                                                                                                                                                                                                                                                                                                                                                                                                      | Low        |
| <b>B. Biology/Ecology</b>                             |      |                                                                                                                                                                         |          |                                                                                                                                                                                                                                                                                                                                                                                                                                                                                                                                                      |            |
| <b>4. Undesirable (or persistence) traits</b>         |      |                                                                                                                                                                         |          |                                                                                                                                                                                                                                                                                                                                                                                                                                                                                                                                                      |            |
| 14                                                    | 4.01 | Is it likely that the taxon will be poisonous or pose other risks to human health?                                                                                      | No       | Not poisonous                                                                                                                                                                                                                                                                                                                                                                                                                                                                                                                                        | Very high  |
| 15                                                    | 4.02 | Is it likely that the taxon will smother one or more native taxa (that are not threatened or protected)?                                                                | Yes      | Chinese carps have ability to fine filter the water and also they grow very fast and can form dense populations, they are versatile in terms of feeding and this can often lead to habitat alterations and disruption of food webs and nutrient cycles in new invaded ecosystems (Milstein et al. 1988; Cooke et al. 2009; Gozlan et al. 2010; Ma et al. 2010; Rosemberg et al. 2010. Such changes as zooplankton and phytoplankton exploitation, shaping the fish communities can affect native fishes populations that are sharing the same niche. | High       |
| 16                                                    | 4.03 | Are there any threatened or protected taxa that the non-native taxon would parasitise in the RA area?                                                                   | No       | Does not parasite                                                                                                                                                                                                                                                                                                                                                                                                                                                                                                                                    | Very high  |
| 17                                                    | 4.04 | Is the taxon adaptable in terms of climatic and other environmental conditions, thus enhancing its potential persistence if it has invaded or could invade the RA area? | Yes      | Yes for example, in India and Bangladesh                                                                                                                                                                                                                                                                                                                                                                                                                                                                                                             | Medium     |
| 18                                                    | 4.05 | Is the taxon likely to disrupt food-web structure/function in aquatic ecosystems if it has invaded or is likely to invade the RA area?                                  | Yes      | They have ability to fine filter the water and also they grow very fast and can form dense populations, they are versatile in terms of feeding and this can often lead to habitat alterations and disruption of food webs and nutrient cycles in new invaded ecosystems (Milstein et al. 1988; Cooke et al. 2009; Gozlan et al. 2010; Ma et al. 2010; Rosemberg et al. 2010.                                                                                                                                                                         | High       |
| 19                                                    | 4.06 | Is the taxon likely to exert adverse impacts on ecosystem services in the RA area?                                                                                      | Yes      | It is possible, however, it should be mentioned that they are not known to be independently reproducing in RA                                                                                                                                                                                                                                                                                                                                                                                                                                        | Medium     |
| 20                                                    | 4.07 | Is it likely that the taxon will host, and/or act as a vector for, recognised pests and infectious agents that are endemic in the RA                                    | Yes      | Possible, but not documented                                                                                                                                                                                                                                                                                                                                                                                                                                                                                                                         | Medium     |

|                                 |      |                                                                                                                                                                    |     |                                                                                                                                                                                                                                                                                                                                                                              |           |
|---------------------------------|------|--------------------------------------------------------------------------------------------------------------------------------------------------------------------|-----|------------------------------------------------------------------------------------------------------------------------------------------------------------------------------------------------------------------------------------------------------------------------------------------------------------------------------------------------------------------------------|-----------|
| 21                              | 4.08 | Is it likely that the taxon will host, and/or act as a vector for, recognised pests and infectious agents that are absent from (novel to) the RA area?             | Yes | it is possible. However, it is not documented.                                                                                                                                                                                                                                                                                                                               | Medium    |
| 22                              | 4.09 | Is it likely that the taxon will achieve a body size that will make it more likely to be released from captivity?                                                  | Yes | yes See: <a href="https://www.fishbase.se/summary/Hypophthalmichthys-nobilis.html">https://www.fishbase.se/summary/Hypophthalmichthys-nobilis.html</a>                                                                                                                                                                                                                       | High      |
| 23                              | 4.10 | Is the taxon capable of sustaining itself in a range of water velocity conditions (e.g. versatile in habitat use)?                                                 | No  | No information available                                                                                                                                                                                                                                                                                                                                                     | Medium    |
| 24                              | 4.11 | Is it likely that the taxon's mode of existence (e.g. excretion of by-products) or behaviours (e.g. feeding) will reduce habitat quality for native taxa?          | Yes | They have ability to fine filter the water and also they grow very fast and can form dense populations, they are versatile in terms of feeding and this can often lead to habitat alterations and disruption of food webs and nutrient cycles in new invaded ecosystems (Milstein et al. 1988; Cooke et al. 2009; Gozlan et al. 2010; Ma et al. 2010; Rosemberg et al. 2010) | High      |
| 25                              | 4.12 | Is the taxon likely to maintain a viable population even when present in low densities (or persisting in adverse conditions by way of a dormant form)?             | Yes | depending on the water and weather conditions                                                                                                                                                                                                                                                                                                                                | Medium    |
| <b>5. Resource exploitation</b> |      |                                                                                                                                                                    |     |                                                                                                                                                                                                                                                                                                                                                                              |           |
| 26                              | 5.01 | Is the taxon likely to consume threatened or protected native taxa in the RA area?                                                                                 | No  | Not known                                                                                                                                                                                                                                                                                                                                                                    | Low       |
| 27                              | 5.02 | Is the taxon likely to sequester food resources (including nutrients) to the detriment of native taxa in the RA area?                                              | Yes | Yes, it is possible                                                                                                                                                                                                                                                                                                                                                          | Medium    |
| <b>6. Reproduction</b>          |      |                                                                                                                                                                    |     |                                                                                                                                                                                                                                                                                                                                                                              |           |
| 28                              | 6.01 | Is the taxon likely to exhibit parental care and/or to reduce age-at-maturity in response to environmental conditions?                                             | No  | No does not exhibit parental care. See: <a href="https://www.fishbase.se/summary/Hypophthalmichthys-nobilis.html">https://www.fishbase.se/summary/Hypophthalmichthys-nobilis.html</a>                                                                                                                                                                                        | High      |
| 29                              | 6.02 | Is the taxon likely to produce viable gametes or propagules (in the RA area)?                                                                                      | No  | No. climate is not suitable                                                                                                                                                                                                                                                                                                                                                  | High      |
| 30                              | 6.03 | Is the taxon likely to hybridise naturally with native taxa?                                                                                                       | No  | No information available                                                                                                                                                                                                                                                                                                                                                     | Very high |
| 31                              | 6.04 | Is the taxon likely to be hermaphroditic or to display asexual reproduction?                                                                                       | Yes | they can be triploids usually for fisheries production                                                                                                                                                                                                                                                                                                                       | Very high |
| 32                              | 6.05 | Is the taxon dependent on the presence of another taxon (or specific habitat features) to complete its life cycle?                                                 | No  | No. See: <a href="https://www.fishbase.se/summary/Hypophthalmichthys-nobilis.html">https://www.fishbase.se/summary/Hypophthalmichthys-nobilis.html</a>                                                                                                                                                                                                                       | Very high |
| 33                              | 6.06 | Is the taxon known (or likely) to produce a large number of propagules or offspring within a short time span (e.g. < 1 year)?                                      | Yes | yes, produces up to 100 000 eggs per season                                                                                                                                                                                                                                                                                                                                  | High      |
| 34                              | 6.07 | How many time units (days, months, years) does the taxon require to reach the age-at-first-reproduction?                                                           | 5   | 5-6 years                                                                                                                                                                                                                                                                                                                                                                    | Very high |
| <b>7. Dispersal mechanisms</b>  |      |                                                                                                                                                                    |     |                                                                                                                                                                                                                                                                                                                                                                              |           |
| 35                              | 7.01 | How many potential internal vectors/pathways could the taxon use to disperse within the RA area (with suitable)                                                    | >1  | Aquaculture and recreational fisheries                                                                                                                                                                                                                                                                                                                                       | High      |
| 36                              | 7.02 | Will any of these vectors/pathways bring the taxon in close proximity to one or more protected areas (e.g. MCZ, MPA, SSSI)?                                        | Yes | Yes. it is possible                                                                                                                                                                                                                                                                                                                                                          | High      |
| 37                              | 7.03 | Does the taxon have a means of actively attaching itself to hard substrata (e.g. ship hulls, pilings, buoys) such that it enhances the likelihood of dispersal?    | No  | No. Morphologically this species does not have a means of actively attaching itself to hard substrata                                                                                                                                                                                                                                                                        | Very high |
| 38                              | 7.04 | Is natural dispersal of the taxon likely to occur as eggs (for animals) or as propagules (for plants: seeds, spores) in the RA area?                               | No  | No. Because does not reproduce in RA                                                                                                                                                                                                                                                                                                                                         | Very high |
| 39                              | 7.05 | Is natural dispersal of the taxon likely to occur as larvae/juveniles (for animals) or as fragments/seedlings (for plants) in the RA area?                         | No  | They do not produce viable gametes and therefore can be distributed by larvae, or juveniles.                                                                                                                                                                                                                                                                                 | Very high |
| 40                              | 7.06 | Are older life stages of the taxon likely to migrate in the RA area for reproduction?                                                                              | No  | Do not reproduce therefore, does not migrate.                                                                                                                                                                                                                                                                                                                                | Very high |
| 41                              | 7.07 | Are propagules or eggs of the taxon likely to be dispersed in the RA area by other animals?                                                                        | No  | No. Can not be dispersed by other animals                                                                                                                                                                                                                                                                                                                                    | Very high |
| 42                              | 7.08 | Is dispersal of the taxon along any of the vectors/pathways mentioned in the previous seven questions (35-41; i.e. both unintentional or intentional) likely to be | Yes | Yes, It seems to be rapid                                                                                                                                                                                                                                                                                                                                                    | High      |
| 43                              | 7.09 | Is dispersal of the taxon density dependent?                                                                                                                       | Yes | Yes, it is possible                                                                                                                                                                                                                                                                                                                                                          | High      |
| <b>8. Tolerance attributes</b>  |      |                                                                                                                                                                    |     |                                                                                                                                                                                                                                                                                                                                                                              |           |
| 44                              | 8.01 | Is the taxon able to withstand being out of water for extended periods (e.g. minimum of one or more hours) at some stage of its life cycle?                        | No  | No information about it                                                                                                                                                                                                                                                                                                                                                      | Low       |

|                          |      |                                                                                                                                                                                           |           |                                                                                                                                                                                                                                                                                                                                                                                                                                                                                                                                              |           |
|--------------------------|------|-------------------------------------------------------------------------------------------------------------------------------------------------------------------------------------------|-----------|----------------------------------------------------------------------------------------------------------------------------------------------------------------------------------------------------------------------------------------------------------------------------------------------------------------------------------------------------------------------------------------------------------------------------------------------------------------------------------------------------------------------------------------------|-----------|
| 45                       | 8.02 | Is the taxon tolerant of a wide range of water quality conditions relevant to that taxon? [In the Justification field, indicate the relevant water quality variable(s) being considered.] | No        | Forages in shallow (0.5-1.5 m deep) and warm (over 24°C) backwaters, lakes and flooded areas with slow current. Feeds on zooplankton throughout its life under natural conditions (Ref. 120904). Breeds in very deep, very turbid and warm water above 18°C (usually 22-30°C), with high current (1.1-1.9 m/s) and high oxygen concentrations. Stocked to large rivers and almost all still water bodies as lakes and ponds. In aquaculture, adults can survive brackish water (up to 7 ppt) when released into estuaries and coastal lakes" | Medium    |
| 46                       | 8.03 | Can the taxon be controlled or eradicated in the wild with chemical, biological, or other agents/means?                                                                                   | Yes       | Yes it can be                                                                                                                                                                                                                                                                                                                                                                                                                                                                                                                                | High      |
| 47                       | 8.04 | Is the taxon likely to tolerate or benefit from environmental/human disturbance?                                                                                                          | No        | No information, probably not                                                                                                                                                                                                                                                                                                                                                                                                                                                                                                                 | Low       |
| 48                       | 8.05 | Is the taxon able to tolerate salinity levels that are higher or lower than those found in its usual environment?                                                                         | No        | No, it can maximum tolerate salinity levels up to 7‰.                                                                                                                                                                                                                                                                                                                                                                                                                                                                                        | Very high |
| 49                       | 8.06 | Are there effective natural enemies (predators) of the taxon present in the RA                                                                                                            | No        | No.No effective natural enemies present in RA area                                                                                                                                                                                                                                                                                                                                                                                                                                                                                           | Very high |
| <b>C. Climate change</b> |      |                                                                                                                                                                                           |           |                                                                                                                                                                                                                                                                                                                                                                                                                                                                                                                                              |           |
| <b>9. Climate change</b> |      |                                                                                                                                                                                           |           |                                                                                                                                                                                                                                                                                                                                                                                                                                                                                                                                              |           |
| 50                       | 9.01 | Under the predicted future climatic conditions, are the risks of entry into the RA area posed by the taxon likely to increase, decrease or not change?                                    | Increase  | It was hypothesized that climate change might alert the mechanisms of transportation and introduction of non-native species. Commercial and recreational activities will increase, that itself increases the propagule pressure levels of non-native                                                                                                                                                                                                                                                                                         | Very high |
| 51                       | 9.02 | Under the predicted future climatic conditions, are the risks of establishment posed by the taxon likely to increase, decrease or not change?                                             | Increase  | if the temperatures increase, it will make their populations able to reproduce independently, therefore the risk of their potential impact is increasing                                                                                                                                                                                                                                                                                                                                                                                     | High      |
| 52                       | 9.03 | Under the predicted future climatic conditions, are the risks of dispersal within the RA area posed by the taxon likely to increase, decrease or not change?                              | Increase  | It could be higher. Because it is known that they create dance populations when they reproduce in new environments and creating problems for the native species                                                                                                                                                                                                                                                                                                                                                                              | Very high |
| 53                       | 9.04 | Under the predicted future climatic conditions, what is the likely magnitude of future potential impacts on biodiversity and/or ecological integrity/status?                              | Higher    | The magnitude of future potential impact on ecosystem structure and function is increasing                                                                                                                                                                                                                                                                                                                                                                                                                                                   | High      |
| 54                       | 9.05 | Under the predicted future climatic conditions, what is the likely magnitude of future potential impacts on ecosystem structure and/or function?                                          | No change | No change                                                                                                                                                                                                                                                                                                                                                                                                                                                                                                                                    | High      |
| 55                       | 9.06 | Under the predicted future climatic conditions, what is the likely magnitude of future potential impacts on ecosystem services/socio-economic factors?                                    | No change | NO change                                                                                                                                                                                                                                                                                                                                                                                                                                                                                                                                    | High      |

| Statistics                                     |             |
|------------------------------------------------|-------------|
| Scores                                         |             |
| <b>BRA</b>                                     | <b>27.0</b> |
| <b>BRA Outcome</b>                             | <b>-</b>    |
| <b>BRA+CCA</b>                                 | <b>35.0</b> |
| <b>BRA+CCA Outcome</b>                         | <b>-</b>    |
| Score partition                                |             |
| <b>A. Biogeography/Historical</b>              | <b>20.0</b> |
| 1. Domestication/Cultivation                   | 4.0         |
| 2. Climate, distribution and introduction risk | 2.0         |
| 3. Invasive elsewhere                          | 14.0        |
| <b>B. Biology/Ecology</b>                      | <b>7.0</b>  |
| 4. Undesirable (or persistence) traits         | 9.0         |
| 5. Resource exploitation                       | 2.0         |
| 6. Reproduction                                | 1.0         |
| 7. Dispersal mechanisms                        | -1.0        |
| 8. Tolerance attributes                        | -4.0        |
| <b>C. Climate change</b>                       | <b>8.0</b>  |
| 9. Climate change                              | 8.0         |
| Answered Questions                             |             |
| <b>Total</b>                                   | <b>55</b>   |
| <b>A. Biogeography/Historical</b>              | <b>13</b>   |
| 1. Domestication/Cultivation                   | 3           |
| 2. Climate, distribution and introduction risk | 5           |
| 3. Invasive elsewhere                          | 5           |
| <b>B. Biology/Ecology</b>                      | <b>36</b>   |
| 4. Undesirable (or persistence) traits         | 12          |
| 5. Resource exploitation                       | 2           |
| 6. Reproduction                                | 7           |
| 7. Dispersal mechanisms                        | 9           |
| 8. Tolerance attributes                        | 6           |
| <b>C. Climate change</b>                       | <b>6</b>    |
| 9. Climate change                              | 6           |
| Sectors affected                               |             |
| <b>Commercial</b>                              | <b>15</b>   |
| <b>Environmental</b>                           | <b>10</b>   |
| <b>Species or population nuisance traits</b>   | <b>15</b>   |

#### Thresholds

|            |         |      |
|------------|---------|------|
|            | BRA     | -    |
|            | BRA+CCA | -    |
| Confidence |         |      |
|            | BRA+CCA | 0.75 |
|            | BRA     | 0.74 |
|            | CCA     | 0.83 |

|                     |  |
|---------------------|--|
| Date and Time       |  |
| 21/05/2022 14:23:56 |  |

## AS-ISK v2

| Taxon and Assessor details         |                                                                                                                                 |
|------------------------------------|---------------------------------------------------------------------------------------------------------------------------------|
| Category                           | Fishes and Lampreys (freshwater)                                                                                                |
| Taxon name                         | <i>Ictalurus punctatus</i>                                                                                                      |
| Common name                        | channel catfish                                                                                                                 |
| Assessor                           | Bella Japoshvili                                                                                                                |
| Risk screening context             |                                                                                                                                 |
| Reason and socio-economic benefits | The species was introduced to the RA area in the past. Most probably not yet established, but could                             |
| Risk assessment area               | South Caucasus                                                                                                                  |
| Taxonomy                           | Actinopteri (ray-finned fishes) > Siluriformes (Catfishes) > Ictaluridae (North American freshwater                             |
| Native range                       | North America                                                                                                                   |
| Introduced range                   | Worldwide sporadically                                                                                                          |
| URL                                | <a href="https://www.fishbase.de/summary/Ictalurus-punctatus.html">https://www.fishbase.de/summary/Ictalurus-punctatus.html</a> |

|                                                |      | Response                                                                                                                                                                | Justification (references and/or other information) | Confidence                                                                                                                                                                                                                                                                                                                                                               |           |
|------------------------------------------------|------|-------------------------------------------------------------------------------------------------------------------------------------------------------------------------|-----------------------------------------------------|--------------------------------------------------------------------------------------------------------------------------------------------------------------------------------------------------------------------------------------------------------------------------------------------------------------------------------------------------------------------------|-----------|
| A. Biogeography/Historical                     |      |                                                                                                                                                                         |                                                     |                                                                                                                                                                                                                                                                                                                                                                          |           |
| 1. Domestication/Cultivation                   |      |                                                                                                                                                                         |                                                     |                                                                                                                                                                                                                                                                                                                                                                          |           |
| 1                                              | 1.01 | Has the taxon been the subject of domestication (or cultivation) for at least 20 generations?                                                                           | Yes                                                 | Welcomme RL, 1988. International introductions of inland aquatic species. FAO Fisheries Technical Paper, No. 294:x + 318 pp                                                                                                                                                                                                                                              | Very high |
| 2                                              | 1.02 | Is the taxon harvested in the wild and likely to be sold or used in its live form?                                                                                      | Yes                                                 | The species is introduced more than 30 countries and in many cases captured in wild. Actually the species is actively aquacultured though the wild catch and selling its life forms is still a usual                                                                                                                                                                     | High      |
| 3                                              | 1.03 | Does the taxon have invasive races, varieties, sub-taxa or congeners?                                                                                                   | No                                                  | Not known other congeners or a specific race as invasive                                                                                                                                                                                                                                                                                                                 | High      |
| 2. Climate, distribution and introduction risk |      |                                                                                                                                                                         |                                                     |                                                                                                                                                                                                                                                                                                                                                                          |           |
| 4                                              | 2.01 | How similar are the climatic conditions of the Risk Assessment (RA) area and the taxon's native range?                                                                  | High                                                | Results of climatch algorithm                                                                                                                                                                                                                                                                                                                                            | Medium    |
| 5                                              | 2.02 | What is the quality of the climate matching data?                                                                                                                       | Low                                                 | Due to low accuracy of local climate data                                                                                                                                                                                                                                                                                                                                | High      |
| 6                                              | 2.03 | Is the taxon already present outside of captivity in the RA area?                                                                                                       | Yes                                                 | Invasive Species Compendium, Datasheet report for Ictalurus punctatus (channel catfish) <a href="https://www.cabi.org/isc/datasheetreport/79127">https://www.cabi.org/isc/datasheetreport/79127</a>                                                                                                                                                                      | Very high |
| 7                                              | 2.04 | How many potential vectors could the taxon use to enter in the RA area?                                                                                                 | None                                                | Human mediated translocation                                                                                                                                                                                                                                                                                                                                             | High      |
| 8                                              | 2.05 | Is the taxon currently found in close proximity to, and likely to enter into, the RA area in the near future (e.g. unintentional and intentional introductions)?        | Yes                                                 | Invasive Species Compendium, Datasheet report for Ictalurus punctatus (channel catfish) <a href="https://www.cabi.org/isc/datasheetreport/79127">https://www.cabi.org/isc/datasheetreport/79127</a>                                                                                                                                                                      | High      |
| 3. Invasive elsewhere                          |      |                                                                                                                                                                         |                                                     |                                                                                                                                                                                                                                                                                                                                                                          |           |
| 9                                              | 3.01 | Has the taxon become naturalised (established viable populations) outside its native range?                                                                             | Yes                                                 | Haubrock, P. J., Azzini, M., Balzani, P., Inghilesi, A. F., & Tricarico, E. (2020). When alien catfish meet—Resource overlap between the North American Ictalurus punctatus and immature European Silurus glanis in the Arno River (Italy). Ecology of Freshwater Fish, 29(1), 4-17.                                                                                     | Very high |
| 10                                             | 3.02 | In the taxon's introduced range, are there known adverse impacts to wild stocks or commercial taxa?                                                                     | No                                                  | Although the species is an opportunistic predator, no hard evidences exists on its adverse impact on wild stock                                                                                                                                                                                                                                                          | Medium    |
| 11                                             | 3.03 | In the taxon's introduced range, are there known adverse impacts to aquaculture?                                                                                        | Yes                                                 | CABI, 2022. Ictalurus punctatus. In: Invasive Species Compendium. Wallingford, UK: CAB International.                                                                                                                                                                                                                                                                    | Medium    |
| 12                                             | 3.04 | In the taxon's introduced range, are there known adverse impacts to ecosystem                                                                                           | Yes                                                 | CABI, 2022. Ictalurus punctatus. In: Invasive Species Compendium. Wallingford, UK: CAB International.                                                                                                                                                                                                                                                                    | Medium    |
| 13                                             | 3.05 | In the taxon's introduced range, are there known adverse socio-economic impacts?                                                                                        | No                                                  | Not reported                                                                                                                                                                                                                                                                                                                                                             | Low       |
| B. Biology/Ecology                             |      |                                                                                                                                                                         |                                                     |                                                                                                                                                                                                                                                                                                                                                                          |           |
| 4. Undesirable (or persistence) traits         |      |                                                                                                                                                                         |                                                     |                                                                                                                                                                                                                                                                                                                                                                          |           |
| 14                                             | 4.01 | Is it likely that the taxon will be poisonous or pose other risks to human health?                                                                                      | No                                                  | It possesses toxic difence mechanisms but not the negative effect on human is reported                                                                                                                                                                                                                                                                                   | Medium    |
| 15                                             | 4.02 | Is it likely that the taxon will smother one or more native taxa (that are not threatened or protected)?                                                                | Yes                                                 | The species at least partly competes at least with native Silurus glanis for food (Haubrock, P. J., Azzini, M., Balzani, P., Inghilesi, A. F., & Tricarico, E. (2020). When alien catfish meet—Resource overlap between the North American Ictalurus punctatus and immature European Silurus glanis in the Arno River (Italy). Ecology of Freshwater Fish, 29(1), 4-17). | Low       |
| 16                                             | 4.03 | Are there any threatened or protected taxa that the non-native taxon would parasitise in the RA area?                                                                   | Yes                                                 | Since it is active predator, any other fishes in the RA area can be smothered                                                                                                                                                                                                                                                                                            | High      |
| 17                                             | 4.04 | Is the taxon adaptable in terms of climatic and other environmental conditions, thus enhancing its potential persistence if it has invaded or could invade the RA area? | Yes                                                 | Based on the widespread distribution of the species, its adaptability of diverse environmental conditions can be deduced                                                                                                                                                                                                                                                 | Medium    |
| 18                                             | 4.05 | Is the taxon likely to disrupt food-web structure/function in aquatic ecosystems if it has invaded or is likely to invade the RA                                        | No                                                  | Not documented evidence exist                                                                                                                                                                                                                                                                                                                                            | Low       |
| 19                                             | 4.06 | Is the taxon likely to exert adverse impacts on ecosystem services in the RA area?                                                                                      | Yes                                                 | Is expected due to its predatory lifestyle                                                                                                                                                                                                                                                                                                                               | Low       |
| 20                                             | 4.07 | Is it likely that the taxon will host, and/or act as a vector for, recognised pests and infectious agents that are endemic in the RA                                    | No                                                  | Not expected                                                                                                                                                                                                                                                                                                                                                             | High      |
| 21                                             | 4.08 | Is it likely that the taxon will host, and/or act as a vector for, recognised pests and infectious agents that are absent from (novel to) the RA area?                  | Yes                                                 | e.g. Geng, Y., Wang, K., Chen, D., Huang, X., He, M., & Yin, Z. (2010). Stenotrophomonas maltophilia, an emerging opportunist pathogen for cultured channel catfish, Ictalurus punctatus, in China. Aquaculture, 308(3-4), 132-135.                                                                                                                                      | High      |



|                                 |      |                                                                                                                                                                              |     |                                                                                                                                                                                                                                                                 |           |
|---------------------------------|------|------------------------------------------------------------------------------------------------------------------------------------------------------------------------------|-----|-----------------------------------------------------------------------------------------------------------------------------------------------------------------------------------------------------------------------------------------------------------------|-----------|
| 22                              | 4.09 | Is it likely that the taxon will achieve a body size that will make it more likely to be released from captivity?                                                            | Yes | It is also kept for recreational purpose and can reach the size unsuitable for a small bodied water reservoirs                                                                                                                                                  | High      |
| 23                              | 4.10 | Is the taxon capable of sustaining itself in a range of water velocity conditions (e.g. versatile in habitat use)?                                                           | Yes | As the species can live in a diverse types of waterbodies                                                                                                                                                                                                       | High      |
| 24                              | 4.11 | Is it likely that the taxon's mode of existence (e.g. excretion of by-products) or behaviours (e.g. feeding) will reduce habitat quality for native taxa?                    | No  | No such an effect is documented                                                                                                                                                                                                                                 | Medium    |
| 25                              | 4.12 | Is the taxon likely to maintain a viable population even when present in low densities (or persisting in adverse conditions by way of a dormant form)?                       | No  | No such an evidence exists                                                                                                                                                                                                                                      | Medium    |
| <b>5. Resource exploitation</b> |      |                                                                                                                                                                              |     |                                                                                                                                                                                                                                                                 |           |
| 26                              | 5.01 | Is the taxon likely to consume threatened or protected native taxa in the RA area?                                                                                           | Yes | Th species is predator and consumes wide variety of freshwater animals                                                                                                                                                                                          | Very high |
| 27                              | 5.02 | Is the taxon likely to sequester food resources (including nutrients) to the detriment of native taxa in the RA area?                                                        | Yes | E.g. <i>Silurus glanis</i>                                                                                                                                                                                                                                      | Very high |
| <b>6. Reproduction</b>          |      |                                                                                                                                                                              |     |                                                                                                                                                                                                                                                                 |           |
| 28                              | 6.01 | Is the taxon likely to exhibit parental care and/or to reduce age-at-maturity in response to environmental conditions?                                                       | Yes | The species exhibit parental care behavior                                                                                                                                                                                                                      | Very high |
| 29                              | 6.02 | Is the taxon likely to produce viable gametes or propagules (in the RA area)?                                                                                                | No  | No documented evidence                                                                                                                                                                                                                                          | Low       |
| 30                              | 6.03 | Is the taxon likely to hybridise naturally with native taxa?                                                                                                                 | Yes | (Arias, C. R., Cai, W., Peatman, E., & Bullard, S. A. (2012). Catfish hybrid <i>Ictalurus punctatus</i> × <i>I. furcatus</i> exhibits higher resistance to columnaris disease than the parental species. <i>Diseases of aquatic organisms</i> , 100(1), 77-81.) | High      |
| 31                              | 6.04 | Is the taxon likely to be hermaphroditic or to display asexual reproduction?                                                                                                 | No  | Not such an evidence is known                                                                                                                                                                                                                                   | High      |
| 32                              | 6.05 | Is the taxon dependent on the presence of another taxon (or specific habitat features) to complete its life cycle?                                                           | No  | Species does not depend on any particular taxa                                                                                                                                                                                                                  | High      |
| 33                              | 6.06 | Is the taxon known (or likely) to produce a large number of propagules or offspring within a short time span (e.g. < 1 year)?                                                | Yes | Usually produces thousands of eggs annually                                                                                                                                                                                                                     | High      |
| 34                              | 6.07 | How many time units (days, months, years) does the taxon require to reach the age-at-first-reproduction?                                                                     | 2   | Years                                                                                                                                                                                                                                                           | High      |
| <b>7. Dispersal mechanisms</b>  |      |                                                                                                                                                                              |     |                                                                                                                                                                                                                                                                 |           |
| 35                              | 7.01 | How many potential internal vectors/pathways could the taxon use to disperse within the RA area (with suitable vectors/pathways)?                                            | >1  | By human mediated translocations as well as direct dispersal using channel system                                                                                                                                                                               | High      |
| 36                              | 7.02 | Will any of these vectors/pathways bring the taxon in close proximity to one or more protected areas (e.g. MCZ, MPA, SSSI)?                                                  | Yes | Colchis national park                                                                                                                                                                                                                                           | Medium    |
| 37                              | 7.03 | Does the taxon have a means of actively attaching itself to hard substrata (e.g. ship hulls, pilings, buoys) such that it enhances the likelihood of dispersal?              | No  | No such fact is sknown                                                                                                                                                                                                                                          | Very high |
| 38                              | 7.04 | Is natural dispersal of the taxon likely to occur as eggs (for animals) or as propagules (for plants: seeds, spores) in the RA area?                                         | No  | No such an evidence exists                                                                                                                                                                                                                                      | Medium    |
| 39                              | 7.05 | Is natural dispersal of the taxon likely to occur as larvae/juveniles (for animals) or as fragments/seedlings (for plants) in the RA area?                                   | Yes | Expected though no documented evidence exist                                                                                                                                                                                                                    | Medium    |
| 40                              | 7.06 | Are older life stages of the taxon likely to migrate in the RA area for reproduction?                                                                                        | No  | Not a migrant species                                                                                                                                                                                                                                           | High      |
| 41                              | 7.07 | Are propagules or eggs of the taxon likely to be dispersed in the RA area by other animals?                                                                                  | No  | Not expected and not observed                                                                                                                                                                                                                                   | High      |
| 42                              | 7.08 | Is dispersal of the taxon along any of the vectors/pathways mentioned in the previous seven questions (35–41; i.e. both unintentional or intentional) likely to be           | No  | Not expected                                                                                                                                                                                                                                                    | Medium    |
| 43                              | 7.09 | Is dispersal of the taxon density dependent?                                                                                                                                 | No  | No documented evidence exists                                                                                                                                                                                                                                   | Low       |
| <b>8. Tolerance attributes</b>  |      |                                                                                                                                                                              |     |                                                                                                                                                                                                                                                                 |           |
| 44                              | 8.01 | Is the taxon able to withstand being out of water for extended periods (e.g. minimum of one or more hours) at some stage of its life cycle?                                  | No  | Not a documented evidence exists                                                                                                                                                                                                                                | Medium    |
| 45                              | 8.02 | Is the taxon tolerant of a wide range of water quality conditions relevant to that taxon? [In the Justification field, indicate the relevant water quality variable(s) being | No  | No relevan research reports are available                                                                                                                                                                                                                       | Low       |
| 46                              | 8.03 | Can the taxon be controlled or eradicated in the wild with chemical, biological, or other agents/means?                                                                      | No  | No such a practice is known                                                                                                                                                                                                                                     | Low       |
| 47                              | 8.04 | Is the taxon likely to tolerate or benefit from environmental/human disturbance?                                                                                             | No  | Not expected and no documented evidence                                                                                                                                                                                                                         | Low       |
| 48                              | 8.05 | Is the taxon able to tolerate salinity levels that are higher or lower than those found in its usual environment?                                                            | No  | No evidence that it tolerates more variable level than presented in tis native areas                                                                                                                                                                            | Low       |

|                          |      |                                                                                                                                                              |           |                                                                                                                                                                                            |        |
|--------------------------|------|--------------------------------------------------------------------------------------------------------------------------------------------------------------|-----------|--------------------------------------------------------------------------------------------------------------------------------------------------------------------------------------------|--------|
| 49                       | 8.06 | Are there effective natural enemies (predators) of the taxon present in the RA                                                                               | No        | There is no effective natural enemy in RA area                                                                                                                                             | High   |
| <b>C. Climate change</b> |      |                                                                                                                                                              |           |                                                                                                                                                                                            |        |
| <b>9. Climate change</b> |      |                                                                                                                                                              |           |                                                                                                                                                                                            |        |
| 50                       | 9.01 | Under the predicted future climatic conditions, are the risks of entry into the RA area posed by the taxon likely to increase, decrease or not change?       | No change | Based on professional judgment                                                                                                                                                             | High   |
| 51                       | 9.02 | Under the predicted future climatic conditions, are the risks of establishment posed by the taxon likely to increase, decrease or not change?                | No change | Based on professional judgment                                                                                                                                                             | Low    |
| 52                       | 9.03 | Under the predicted future climatic conditions, are the risks of dispersal within the RA area posed by the taxon likely to increase, decrease or not change? | No change | Based on professional judgment                                                                                                                                                             | Medium |
| 53                       | 9.04 | Under the predicted future climatic conditions, what is the likely magnitude of future potential impacts on biodiversity and/or ecological integrity/status? | Higher    | Species is not currently established in the region. If it will establish in the future, given the changing climate conditions, the effect on biodiversity/ecological integrity is expected | Low    |
| 54                       | 9.05 | Under the predicted future climatic conditions, what is the likely magnitude of future potential impacts on ecosystem structure and/or function?             | Higher    | Species is not currently established in the region. If it will establish in the future, given the changing climate conditions, the effect on biodiversity/ecological integrity is expected | Low    |
| 55                       | 9.06 | Under the predicted future climatic conditions, what is the likely magnitude of future potential impacts on ecosystem services/socio-economic factors?       | Higher    | Species is not currently established in the region. If it will establish in the future, given the changing climate conditions, the effect on biodiversity/ecological integrity is expected | Low    |

| Statistics                                     |             |
|------------------------------------------------|-------------|
| Scores                                         |             |
| <b>BRA</b>                                     | <b>26.0</b> |
| <b>BRA Outcome</b>                             | <b>-</b>    |
| <b>BRA+CCA</b>                                 | <b>32.0</b> |
| <b>BRA+CCA Outcome</b>                         | <b>-</b>    |
| Score partition                                |             |
| <b>A. Biogeography/Historical</b>              | <b>12.0</b> |
| 1. Domestication/Cultivation                   | 2.0         |
| 2. Climate, distribution and introduction risk | 0.0         |
| 3. Invasive elsewhere                          | 10.0        |
| <b>B. Biology/Ecology</b>                      | <b>14.0</b> |
| 4. Undesirable (or persistence) traits         | 7.0         |
| 5. Resource exploitation                       | 7.0         |
| 6. Reproduction                                | 3.0         |
| 7. Dispersal mechanisms                        | -1.0        |
| 8. Tolerance attributes                        | -2.0        |
| <b>C. Climate change</b>                       | <b>6.0</b>  |
| 9. Climate change                              | 6.0         |
| Answered Questions                             |             |
| <b>Total</b>                                   | <b>55</b>   |
| <b>A. Biogeography/Historical</b>              | <b>13</b>   |
| 1. Domestication/Cultivation                   | 3           |
| 2. Climate, distribution and introduction risk | 5           |
| 3. Invasive elsewhere                          | 5           |
| <b>B. Biology/Ecology</b>                      | <b>36</b>   |
| 4. Undesirable (or persistence) traits         | 12          |
| 5. Resource exploitation                       | 2           |
| 6. Reproduction                                | 7           |
| 7. Dispersal mechanisms                        | 9           |
| 8. Tolerance attributes                        | 6           |
| <b>C. Climate change</b>                       | <b>6</b>    |
| 9. Climate change                              | 6           |
| Sectors affected                               |             |
| <b>Commercial</b>                              | <b>10</b>   |
| <b>Environmental</b>                           | <b>15</b>   |
| <b>Species or population nuisance traits</b>   | <b>9</b>    |

| Thresholds     |             |
|----------------|-------------|
| <b>BRA</b>     | <b>-</b>    |
| <b>BRA+CCA</b> | <b>-</b>    |
| Confidence     |             |
| <b>BRA+CCA</b> | <b>0.59</b> |
| <b>BRA</b>     | <b>0.62</b> |
| <b>CCA</b>     | <b>0.38</b> |

| Date and Time       |
|---------------------|
| 16/05/2022 14:13:10 |

## AS-ISK v2

| Taxon and Assessor details         |                                                                                                                                 |
|------------------------------------|---------------------------------------------------------------------------------------------------------------------------------|
| Category                           | Fishes and Lampreys (freshwater)                                                                                                |
| Taxon name                         | <i>Ictalurus punctatus</i>                                                                                                      |
| Common name                        | channel catfish                                                                                                                 |
| Assessor                           | Giorgi Epitashvili                                                                                                              |
| Risk screening context             |                                                                                                                                 |
| Reason and socio-economic benefits | Interest in channel catfish began when the United States Fish and Fisheries Commission began                                    |
| Risk assessment area               | South Caucasus                                                                                                                  |
| Taxonomy                           | <i>Ictalurus punctatus</i> (Rafinesque 1818)                                                                                    |
| Native range                       | North America: St. Lawrence-Great Lakes, Hudson Bay (Red River drainage), and Missouri-                                         |
| Introduced range                   | Introduced throughout most of US. Channel catfish have been introduced into Europe, Russian                                     |
| URL                                | <a href="https://www.fishbase.in/summary/ictalurus-punctatus.html">https://www.fishbase.in/summary/ictalurus-punctatus.html</a> |

|                                                |      | Response                                                                                                                                                         | Justification (references and/or other information) | Confidence                                                                                                                                                                                                                                                                                                                                                                                                                                                                                                                                                                                                                                                                                                                                                                                                                                                                                                                                 |           |
|------------------------------------------------|------|------------------------------------------------------------------------------------------------------------------------------------------------------------------|-----------------------------------------------------|--------------------------------------------------------------------------------------------------------------------------------------------------------------------------------------------------------------------------------------------------------------------------------------------------------------------------------------------------------------------------------------------------------------------------------------------------------------------------------------------------------------------------------------------------------------------------------------------------------------------------------------------------------------------------------------------------------------------------------------------------------------------------------------------------------------------------------------------------------------------------------------------------------------------------------------------|-----------|
| A. Biogeography/Historical                     |      |                                                                                                                                                                  |                                                     |                                                                                                                                                                                                                                                                                                                                                                                                                                                                                                                                                                                                                                                                                                                                                                                                                                                                                                                                            |           |
| 1. Domestication/Cultivation                   |      |                                                                                                                                                                  |                                                     |                                                                                                                                                                                                                                                                                                                                                                                                                                                                                                                                                                                                                                                                                                                                                                                                                                                                                                                                            |           |
| 1                                              | 1.01 | Has the taxon been the subject of domestication (or cultivation) for at least 20 generations?                                                                    | Yes                                                 | Commercial aquaculture was first considered to be economically practical in the late 1950s. Catfish farming developed rapidly during the 1960s and 1970s as improvements in pond management, disease identification and control, and prepared feeds were developed and adopted by farmers. The commercial industry developed in the southern United States within the original range of the species. At least 90 percent of the farmed fish are produced in the Mississippi River Valley region.                                                                                                                                                                                                                                                                                                                                                                                                                                           | Very high |
| 2                                              | 1.02 | Is the taxon harvested in the wild and likely to be sold or used in its live form?                                                                               | Yes                                                 | Catfish are the most consumed native freshwater fish in the US (NASS 2006). Although commercial aquaculture produces most catfish consumed (NASS 2006), free living populations of channel catfish ( <i>Ictalurus punctatus</i> ) still provide important sport and commercial fisheries throughout the US.                                                                                                                                                                                                                                                                                                                                                                                                                                                                                                                                                                                                                                | Very high |
| 3                                              | 1.03 | Does the taxon have invasive races, varieties, sub-taxa or congeners?                                                                                            | Yes                                                 | <i>I. punctatus</i> recorded as invasive species in 28 countries and islands. The North American channel catfish <i>Ictalurus punctatus</i> has been introduced to several locations in Europe but has received little or no scientific study despite its invasive attributes, including prolific reproduction, tolerance to a wide range of conditions, opportunistic feeding, at least partial 'predator release', and some evidence of environmental impacts (e.g. disease transmission) (Haubrock et al. 2021).                                                                                                                                                                                                                                                                                                                                                                                                                        | Very high |
| 2. Climate, distribution and introduction risk |      |                                                                                                                                                                  |                                                     |                                                                                                                                                                                                                                                                                                                                                                                                                                                                                                                                                                                                                                                                                                                                                                                                                                                                                                                                            |           |
| 4                                              | 2.01 | How similar are the climatic conditions of the Risk Assessment (RA) area and the taxon's native range?                                                           | High                                                | Koppen - Geiger climate classification                                                                                                                                                                                                                                                                                                                                                                                                                                                                                                                                                                                                                                                                                                                                                                                                                                                                                                     | Medium    |
| 5                                              | 2.02 | What is the quality of the climate matching data?                                                                                                                | Medium                                              | Koppen - Geiger climate classification                                                                                                                                                                                                                                                                                                                                                                                                                                                                                                                                                                                                                                                                                                                                                                                                                                                                                                     | Medium    |
| 6                                              | 2.03 | Is the taxon already present outside of captivity in the RA area?                                                                                                | No                                                  | No such fact has been detected                                                                                                                                                                                                                                                                                                                                                                                                                                                                                                                                                                                                                                                                                                                                                                                                                                                                                                             | Low       |
| 7                                              | 2.04 | How many potential vectors could the taxon use to enter in the RA area?                                                                                          | One                                                 | This species may be spread by humans intentionally.                                                                                                                                                                                                                                                                                                                                                                                                                                                                                                                                                                                                                                                                                                                                                                                                                                                                                        | Medium    |
| 8                                              | 2.05 | Is the taxon currently found in close proximity to, and likely to enter into, the RA area in the near future (e.g. unintentional and intentional introductions)? | Yes                                                 | There appears to be some disagreement regarding the presence of the channel catfish in Turkey; Cildir (2001) reported that its introduction into Lake Egirdir was unsuccessful. However, it is listed as being present in a report listing its use in aquaculture and stocking operations (Olenin et al., 2008) and in reservoir systems (Innal and Erk'akan, 2006; Innal, 2012).                                                                                                                                                                                                                                                                                                                                                                                                                                                                                                                                                          | Low       |
| 3. Invasive elsewhere                          |      |                                                                                                                                                                  |                                                     |                                                                                                                                                                                                                                                                                                                                                                                                                                                                                                                                                                                                                                                                                                                                                                                                                                                                                                                                            |           |
| 9                                              | 3.01 | Has the taxon become naturalised (established viable populations) outside its native range?                                                                      | Yes                                                 | The channel catfish, <i>Ictalurus punctatus</i> , is an invasive alien species introduced from North America. We investigated the present status of the fish in Japan and found that it is widely distributed in the Abukuma, Tone, and Yahagi River systems, as well as in Lake Shimokotori (Katano et al. 2010).                                                                                                                                                                                                                                                                                                                                                                                                                                                                                                                                                                                                                         | Very high |
| 10                                             | 3.02 | In the taxon's introduced range, are there known adverse impacts to wild stocks or commercial taxa?                                                              | Yes                                                 | In the metric "Relative Impact Potential" (RIP), the functional response (FR) of a non-native species can be compared with that of a native analogue and combined with the species abundance to predict its environmental impact. Here, using the River Guaraguaçu (Brazil) as a case study, this methodology was implemented to identify the impacts of the non-native channel catfish <i>Ictalurus punctatus</i> (Rafinesque) compared with a native species <i>Rhamdia quelen</i> (Quoy & Gaimard) towards small prey fish. Both species exhibited Type II FRs, but handling times were lower for <i>I. punctatus</i> , resulting in a greater maximum feeding rate in this species. Consequently, an RIP > 1 was found, indicating that <i>I. punctatus</i> represents a superior impact to prey compared with its native analogue. These results demonstrate that <i>I. punctatus</i> is a potential threat to small endangered fish. | Very high |
| 11                                             | 3.03 | In the taxon's introduced range, are there known adverse impacts to aquaculture?                                                                                 | No                                                  | This species has been introduced to at least 11 countries but the ecological and economic impacts of this nonnative species are fairly unknown throughout most of its introduced range                                                                                                                                                                                                                                                                                                                                                                                                                                                                                                                                                                                                                                                                                                                                                     | Low       |
| 12                                             | 3.04 | In the taxon's introduced range, are there known adverse impacts to ecosystem services?                                                                          | No                                                  | This species has been introduced to at least 11 countries but the ecological and economic impacts of this nonnative species are fairly unknown throughout most of its introduced range                                                                                                                                                                                                                                                                                                                                                                                                                                                                                                                                                                                                                                                                                                                                                     | Low       |
| 13                                             | 3.05 | In the taxon's introduced range, are there known adverse socio-economic impacts?                                                                                 | No                                                  | This species has been introduced to at least 11 countries but the ecological and economic impacts of this nonnative species are fairly unknown throughout most of its introduced range                                                                                                                                                                                                                                                                                                                                                                                                                                                                                                                                                                                                                                                                                                                                                     | Low       |
| B. Biology/Ecology                             |      |                                                                                                                                                                  |                                                     |                                                                                                                                                                                                                                                                                                                                                                                                                                                                                                                                                                                                                                                                                                                                                                                                                                                                                                                                            |           |

| 4. Undesirable (or persistence) traits |      |                                                                                                                                                                         |                |                                                                                                                                                                                                                                                           |           |
|----------------------------------------|------|-------------------------------------------------------------------------------------------------------------------------------------------------------------------------|----------------|-----------------------------------------------------------------------------------------------------------------------------------------------------------------------------------------------------------------------------------------------------------|-----------|
| 14                                     | 4.01 | Is it likely that the taxon will be poisonous or pose other risks to human health?                                                                                      | No             | This species does not pose a threat to humans.                                                                                                                                                                                                            | High      |
| 15                                     | 4.02 | Is it likely that the taxon will smother one or more native taxa (that are not threatened or protected)?                                                                | Yes            | Invasive channel catfish exerted heavy predation on <i>P. clarkii</i> and <i>P. parva</i> in Japan opposed to available native prey (Endo et al. 2015)                                                                                                    | Very high |
| 16                                     | 4.03 | Are there any threatened or protected taxa that the non-native taxon would parasitise in the RA area?                                                                   | Yes            | There are many threatened and protected species in the Caucasus region which can be hunted by this species ( <i>Salmo</i> spp, <i>Acipenser</i> spp, <i>Luciobarbus capito</i> , etc.)                                                                    | Very high |
| 17                                     | 4.04 | Is the taxon adaptable in terms of climatic and other environmental conditions, thus enhancing its potential persistence if it has invaded or could invade the RA area? | Yes            | Own judgement                                                                                                                                                                                                                                             | High      |
| 18                                     | 4.05 | Is the taxon likely to disrupt food-web structure/function in aquatic ecosystems if it has invaded or is likely to invade the RA area?                                  | Yes            | Introduced channel catfish can exert a major negative effect on populations of native and endangered species, and commercial fisheries, through competition for food, habitat or through predation (cabi.org).                                            | High      |
| 19                                     | 4.06 | Is the taxon likely to exert adverse impacts on ecosystem services in the RA area?                                                                                      | Yes            | A similar fact is to be expected because <i>I. punctatus</i> is an aggressive predator and can have a negative impact on local fish                                                                                                                       | Medium    |
| 20                                     | 4.07 | Is it likely that the taxon will host, and/or act as a vector for, recognised pests and infectious agents that are endemic in the RA area?                              | Not applicable | Data deficient                                                                                                                                                                                                                                            | Low       |
| 21                                     | 4.08 | Is it likely that the taxon will host, and/or act as a vector for, recognised pests and infectious agents that are absent from (novel to) the RA area?                  | Not applicable | Data deficient                                                                                                                                                                                                                                            | Low       |
| 22                                     | 4.09 | Is it likely that the taxon will achieve a body size that will make it more likely to be released from captivity?                                                       | Yes            | Max length: 132 cm TL male/unsexed; common length: 57.0 cm SL male/unsexed; max. published weight: 26.3 kg.                                                                                                                                               | Very high |
| 23                                     | 4.10 | Is the taxon capable of sustaining itself in a range of water velocity conditions (e.g. versatile in habitat use)?                                                      | Yes            | Inhabits lakes and deep pools and runs over sand or rocks in small to large rivers. Adults occur in rivers and streams and prefer clean, well oxygenated water, but also in ponds and reservoirs.                                                         | High      |
| 24                                     | 4.11 | Is it likely that the taxon's mode of existence (e.g. excretion of by-products) or behaviours (e.g. feeding) will reduce habitat quality for native taxa?               | Yes            | Studies in this regard are not known it is expected, however, that habitat quality will be affected by its distribution.                                                                                                                                  | High      |
| 25                                     | 4.12 | Is the taxon likely to maintain a viable population even when present in low densities (or persisting in adverse conditions by way of a dormant form)?                  | Yes            | With an optimum water temperature range between 24 and 30 °C, channel catfish possesses the demonstrated ability to establish self-sustaining populations outside its native range, both when translocated within North America and introduced elsewhere. | Medium    |
| 5. Resource exploitation               |      |                                                                                                                                                                         |                |                                                                                                                                                                                                                                                           |           |
| 26                                     | 5.01 | Is the taxon likely to consume threatened or protected native taxa in the RA area?                                                                                      | Yes            | This species is predator and can consume as threatened and protected species in the Caucasus Region, such as <i>Salmo</i> spp, <i>Acipenser</i> spp, <i>Luciobarbus capito</i> , etc.                                                                     | Very high |
| 27                                     | 5.02 | Is the taxon likely to sequester food resources (including nutrients) to the detriment of native taxa in the RA area?                                                   | Yes            | This species is predator and will be a serious competitor for local species                                                                                                                                                                               | Very high |
| 6. Reproduction                        |      |                                                                                                                                                                         |                |                                                                                                                                                                                                                                                           |           |
| 28                                     | 6.01 | Is the taxon likely to exhibit parental care and/or to reduce age-at-maturity in response to environmental conditions?                                                  | Yes            | Behavioral observations have suggested that Channel Catfish spawn as monogamous pairs and that males alone provide subsequent care to the resulting embryos and fry (Tatarenkov et                                                                        | High      |
| 29                                     | 6.02 | Is the taxon likely to produce viable gametes or propagules (in the RA area)?                                                                                           | No             | So far this species cannot reproduce in the region                                                                                                                                                                                                        | High      |
| 30                                     | 6.03 | Is the taxon likely to hybridise naturally with native taxa?                                                                                                            | No             | Data deficient                                                                                                                                                                                                                                            | Medium    |
| 31                                     | 6.04 | Is the taxon likely to be hermaphroditic or to display asexual reproduction?                                                                                            | No             | Data deficient                                                                                                                                                                                                                                            | Low       |
| 32                                     | 6.05 | Is the taxon dependent on the presence of another taxon (or specific habitat features) to complete its life cycle?                                                      | No             | Data deficient                                                                                                                                                                                                                                            | Medium    |
| 33                                     | 6.06 | Is the taxon known (or likely) to produce a large number of propagules or offspring within a short time span (e.g. < 1 year)?                                           | Yes            | Channel catfish requires cool water and short day lengths during the winter months for proper egg development; an egg mass can contain up to 20,000 eggs. Sexual maturity is reached at 2-3                                                               | Medium    |
| 34                                     | 6.07 | How many time units (days, months, years) does the taxon require to reach the age-at-first-reproduction?                                                                | 2              | Sexual maturity in Channel catfish is reached at 2-3 years.                                                                                                                                                                                               | Very high |
| 7. Dispersal mechanisms                |      |                                                                                                                                                                         |                |                                                                                                                                                                                                                                                           |           |
| 35                                     | 7.01 | How many potential internal vectors/pathways could the taxon use to disperse within the RA area (with suitable                                                          | One            | This species may spread as a result of escaping from the fish farms                                                                                                                                                                                       | High      |
| 36                                     | 7.02 | Will any of these vectors/pathways bring the taxon in close proximity to one or more protected areas (e.g. MCZ, MPA, SSSI)?                                             | Yes            | The probability of this is high (own judgement)                                                                                                                                                                                                           | High      |
| 37                                     | 7.03 | Does the taxon have a means of actively attaching itself to hard substrata (e.g. ship hulls, pilings, buoys) such that it enhances the likelihood of dispersal?         | No             | This species does not have such means                                                                                                                                                                                                                     | Medium    |
| 38                                     | 7.04 | Is natural dispersal of the taxon likely to occur as eggs (for animals) or as propagules (for plants: seeds, spores) in the RA area?                                    | No             | This species does not reproduces in the region                                                                                                                                                                                                            | High      |
| 39                                     | 7.05 | Is natural dispersal of the taxon likely to occur as larvae/juveniles (for animals) or as fragments/seedlings (for plants) in the RA area?                              | No             | This species does not reproduces in the region                                                                                                                                                                                                            | High      |

|                                |      |                                                                                                                                                                              |                |                                                                                                                                                                                                                                                                                                                                                                                                                                                                                                                                                                                                                                          |        |
|--------------------------------|------|------------------------------------------------------------------------------------------------------------------------------------------------------------------------------|----------------|------------------------------------------------------------------------------------------------------------------------------------------------------------------------------------------------------------------------------------------------------------------------------------------------------------------------------------------------------------------------------------------------------------------------------------------------------------------------------------------------------------------------------------------------------------------------------------------------------------------------------------------|--------|
| 40                             | 7.06 | Are older life stages of the taxon likely to migrate in the RA area for reproduction?                                                                                        | No             | This species does not reproduce in the region                                                                                                                                                                                                                                                                                                                                                                                                                                                                                                                                                                                            | High   |
| 41                             | 7.07 | Are propagules or eggs of the taxon likely to be dispersed in the RA area by other animals?                                                                                  | No             | Such fact has not been detected yet                                                                                                                                                                                                                                                                                                                                                                                                                                                                                                                                                                                                      | High   |
| 42                             | 7.08 | Is dispersal of the taxon along any of the vectors/pathways mentioned in the previous seven questions (35–41; i.e. both unintentional or intentional) likely to be           | Not applicable | Data deficient                                                                                                                                                                                                                                                                                                                                                                                                                                                                                                                                                                                                                           | Low    |
| 43                             | 7.09 | Is dispersal of the taxon density dependent?                                                                                                                                 | Not applicable | Data deficient                                                                                                                                                                                                                                                                                                                                                                                                                                                                                                                                                                                                                           | Low    |
| <b>8. Tolerance attributes</b> |      |                                                                                                                                                                              |                |                                                                                                                                                                                                                                                                                                                                                                                                                                                                                                                                                                                                                                          |        |
| 44                             | 8.01 | Is the taxon able to withstand being out of water for extended periods (e.g. minimum of one or more hours) at some stage of its life cycle?                                  | No             | No such fact has been detected                                                                                                                                                                                                                                                                                                                                                                                                                                                                                                                                                                                                           | Medium |
| 45                             | 8.02 | Is the taxon tolerant of a wide range of water quality conditions relevant to that taxon? [In the Justification field, indicate the relevant water quality variable(s) being | Yes            | Inhabits lakes and deep pools and runs over sand or rocks in small to large rivers. Adults occur in rivers and streams and prefer clean, well oxygenated water, but also in ponds and reservoirs.                                                                                                                                                                                                                                                                                                                                                                                                                                        | Medium |
| 46                             | 8.03 | Can the taxon be controlled or eradicated in the wild with chemical, biological, or other agents/means?                                                                      | No             | Data deficient                                                                                                                                                                                                                                                                                                                                                                                                                                                                                                                                                                                                                           | Low    |
| 47                             | 8.04 | Is the taxon likely to tolerate or benefit from environmental/human disturbance?                                                                                             | Yes            | This fish is spread mainly from the fish farms                                                                                                                                                                                                                                                                                                                                                                                                                                                                                                                                                                                           | High   |
| 48                             | 8.05 | Is the taxon able to tolerate salinity levels that are higher or lower than those found in its usual environment?                                                            | Yes            | Channel catfish fry were more resistant to saltiness than hybrid catfish and blue catfish ( $P < 0.0001$ ) at 6.0 ppt for swim-up fry (Abass & Dunham 2017).                                                                                                                                                                                                                                                                                                                                                                                                                                                                             | Medium |
| 49                             | 8.06 | Are there effective natural enemies (predators) of the taxon present in the RA area?                                                                                         | Yes            | Channel catfish has a limited number of natural predators, which include pikeperches Sander spp. (Scott and Crossman 1973; Hanchin et al. 2002), cormorants Phalacrocorax spp., herons Ardea spp., pelicans Pelecanus spp. and otters (Lutra lutra). Younger (smaller) channel catfish are particularly susceptible to avian predators (Glahn and Dorr 2002; Wywiałowski 1999). However, despite its strongly piscivorous diet, the northern pike Esox lucius is not likely to take ictalurid catfishes. In the Caucasus region only Otter and Sander lucioperca can be considered as potential natural enemies of <i>I. punctatus</i> . | High   |

### C. Climate change

#### 9. Climate change

|    |      |                                                                                                                                                              |          |               |     |
|----|------|--------------------------------------------------------------------------------------------------------------------------------------------------------------|----------|---------------|-----|
| 50 | 9.01 | Under the predicted future climatic conditions, are the risks of entry into the RA area posed by the taxon likely to increase, decrease or not change?       | Increase | Own judgement | Low |
| 51 | 9.02 | Under the predicted future climatic conditions, are the risks of establishment posed by the taxon likely to increase, decrease or not change?                | Increase | Own judgement | Low |
| 52 | 9.03 | Under the predicted future climatic conditions, are the risks of dispersal within the RA area posed by the taxon likely to increase, decrease or not change? | Increase | Own judgement | Low |
| 53 | 9.04 | Under the predicted future climatic conditions, what is the likely magnitude of future potential impacts on biodiversity and/or ecological integrity/status? | Higher   | Own judgement | Low |
| 54 | 9.05 | Under the predicted future climatic conditions, what is the likely magnitude of future potential impacts on ecosystem structure and/or function?             | Higher   | Own judgement | Low |
| 55 | 9.06 | Under the predicted future climatic conditions, what is the likely magnitude of future potential impacts on ecosystem services/socio-economic factors?       | Higher   | Own judgement | Low |

| Statistics                                     |             |
|------------------------------------------------|-------------|
| Scores                                         |             |
| <b>BRA</b>                                     | <b>28.0</b> |
| <b>BRA Outcome</b>                             | -           |
| <b>BRA+CCA</b>                                 | <b>40.0</b> |
| <b>BRA+CCA Outcome</b>                         | -           |
| Score partition                                |             |
| <b>A. Biogeography/Historical</b>              | <b>10.0</b> |
| 1. Domestication/Cultivation                   | 4.0         |
| 2. Climate, distribution and introduction risk | 0.0         |
| 3. Invasive elsewhere                          | 6.0         |
| <b>B. Biology/Ecology</b>                      | <b>18.0</b> |
| 4. Undesirable (or persistence) traits         | 9.0         |
| 5. Resource exploitation                       | 7.0         |
| 6. Reproduction                                | 1.0         |
| 7. Dispersal mechanisms                        | -4.0        |
| 8. Tolerance attributes                        | 5.0         |
| <b>C. Climate change</b>                       | <b>12.0</b> |
| 9. Climate change                              | 12.0        |
| Answered Questions                             |             |
| <b>Total</b>                                   | <b>55</b>   |
| <b>A. Biogeography/Historical</b>              | <b>13</b>   |

|                                                |           |
|------------------------------------------------|-----------|
| 1. Domestication/Cultivation                   | 3         |
| 2. Climate, distribution and introduction risk | 5         |
| 3. Invasive elsewhere                          | 5         |
| <b>B. Biology/Ecology</b>                      | <b>36</b> |
| 4. Undesirable (or persistence) traits         | 12        |
| 5. Resource exploitation                       | 2         |
| 6. Reproduction                                | 7         |
| 7. Dispersal mechanisms                        | 9         |
| 8. Tolerance attributes                        | 6         |
| <b>C. Climate change</b>                       | <b>6</b>  |
| 9. Climate change                              | 6         |
| <b>Sectors affected</b>                        |           |
| Commercial                                     | 9         |
| Environmental                                  | 13        |
| <b>Species or population nuisance traits</b>   | <b>19</b> |

|                   |                |             |
|-------------------|----------------|-------------|
| <b>Thresholds</b> |                |             |
|                   | <b>BRA</b>     | -           |
|                   | <b>BRA+CCA</b> | -           |
| <b>Confidence</b> |                |             |
|                   | <b>BRA+CCA</b> | <b>0.59</b> |
|                   | <b>BRA</b>     | <b>0.63</b> |
|                   | <b>CCA</b>     | <b>0.25</b> |

|                      |  |
|----------------------|--|
| <b>Date and Time</b> |  |
| 10/05/2022 19:07:02  |  |

## AS-ISK v2

| Taxon and Assessor details         |                                                                                                                                 |
|------------------------------------|---------------------------------------------------------------------------------------------------------------------------------|
| Category                           | Fishes and Lampreys (freshwater)                                                                                                |
| Taxon name                         | <i>Ictalurus punctatus</i>                                                                                                      |
| Common name                        | channel catfish                                                                                                                 |
| Assessor                           | Tatia Kuljanishvili                                                                                                             |
| Risk screening context             |                                                                                                                                 |
| Reason and socio-economic benefits | Aquaculture species                                                                                                             |
| Risk assessment area               | South Caucasus                                                                                                                  |
| Taxonomy                           | Actinopteri (ray-finned fishes) > Siluriformes (Catfish) > Ictaluridae                                                          |
| Native range                       | North America                                                                                                                   |
| Introduced range                   | Worldwide                                                                                                                       |
| URL                                | <a href="https://www.fishbase.se/summary/Ictalurus-punctatus.html">https://www.fishbase.se/summary/Ictalurus-punctatus.html</a> |

|                                                |      |                                                                                                                                                                         | Response | Justification (references and/or other information)                                                                                                                                                                                                                                                                                                                                                                                                                                                                                                                                             | Confidence |
|------------------------------------------------|------|-------------------------------------------------------------------------------------------------------------------------------------------------------------------------|----------|-------------------------------------------------------------------------------------------------------------------------------------------------------------------------------------------------------------------------------------------------------------------------------------------------------------------------------------------------------------------------------------------------------------------------------------------------------------------------------------------------------------------------------------------------------------------------------------------------|------------|
| A. Biogeography/Historical                     |      |                                                                                                                                                                         |          |                                                                                                                                                                                                                                                                                                                                                                                                                                                                                                                                                                                                 |            |
| 1. Domestication/Cultivation                   |      |                                                                                                                                                                         |          |                                                                                                                                                                                                                                                                                                                                                                                                                                                                                                                                                                                                 |            |
| 1                                              | 1.01 | Has the taxon been the subject of domestication (or cultivation) for at least 20 generations?                                                                           | Yes      | Yes. Commercially valuable fish.<br><a href="https://www.fishbase.de/summary/275">https://www.fishbase.de/summary/275</a>                                                                                                                                                                                                                                                                                                                                                                                                                                                                       | Very high  |
| 2                                              | 1.02 | Is the taxon harvested in the wild and likely to be sold or used in its live form?                                                                                      | Yes      | Yes. Taxon is harvested in wild and is sold in its live form                                                                                                                                                                                                                                                                                                                                                                                                                                                                                                                                    | Very high  |
| 3                                              | 1.03 | Does the taxon have invasive races, varieties, sub-taxa or congeners?                                                                                                   | No       | No does not have invasive races                                                                                                                                                                                                                                                                                                                                                                                                                                                                                                                                                                 | High       |
| 2. Climate, distribution and introduction risk |      |                                                                                                                                                                         |          |                                                                                                                                                                                                                                                                                                                                                                                                                                                                                                                                                                                                 |            |
| 4                                              | 2.01 | How similar are the climatic conditions of the Risk Assessment (RA) area and the taxon's native range?                                                                  | High     | Similar, out of 20 stations, 15 matches at the value of 9                                                                                                                                                                                                                                                                                                                                                                                                                                                                                                                                       | Medium     |
| 5                                              | 2.02 | What is the quality of the climate matching data?                                                                                                                       | Medium   | Medium                                                                                                                                                                                                                                                                                                                                                                                                                                                                                                                                                                                          | Medium     |
| 6                                              | 2.03 | Is the taxon already present outside of captivity in the RA area?                                                                                                       | No       | No evidence.                                                                                                                                                                                                                                                                                                                                                                                                                                                                                                                                                                                    | Very high  |
| 7                                              | 2.04 | How many potential vectors could the taxon use to enter in the RA area?                                                                                                 | One      | Aquaculture                                                                                                                                                                                                                                                                                                                                                                                                                                                                                                                                                                                     | Very high  |
| 8                                              | 2.05 | Is the taxon currently found in close proximity to, and likely to enter into, the RA area in the near future (e.g. unintentional and intentional introductions)?        | Yes      | Yes. Established in neighbouring areas                                                                                                                                                                                                                                                                                                                                                                                                                                                                                                                                                          | Very high  |
| 3. Invasive elsewhere                          |      |                                                                                                                                                                         |          |                                                                                                                                                                                                                                                                                                                                                                                                                                                                                                                                                                                                 |            |
| 9                                              | 3.01 | Has the taxon become naturalised (established viable populations) outside its native range?                                                                             | Yes      | Cultured worldwide, it has been introduced in more than 32 countries including Italy, Brazil, China, Japan and Russia for aquaculture and recreational fisheries. It has been introduced for aquaculture and recreational fisheries to over 32 countries, and widely throughout the USA, and has established itself in most waters to which it has been introduced.                                                                                                                                                                                                                             | High       |
| 10                                             | 3.02 | In the taxon's introduced range, are there known adverse impacts to wild stocks or commercial taxa?                                                                     | Yes      | it can threaten the wild stocks through predation, hybridization, and competition.                                                                                                                                                                                                                                                                                                                                                                                                                                                                                                              | Very high  |
| 11                                             | 3.03 | In the taxon's introduced range, are there known adverse impacts to aquaculture?                                                                                        | Yes      | Channel catfish in the James River estuary in Virginia were reported to prey on blue crab ( <i>Callinectes sapidus</i> ) and white perch ( <i>Morone americana</i> ) and are known to eat the spawn of many other commercial sport and fishery species, including Atlantic shad ( <i>Alosa sapidissima</i> ), blueback herring ( <i>A. aestivalis</i> ), alewife ( <i>A. pseudoharengus</i> ) (Menzel, 1945). McGovern and Olney (1988) found <i>M. americana</i> eggs and <i>M. saxatilis</i> eggs and larvae in gut contents of juvenile channel catfish from the Pamunkey River in Virginia. | Very high  |
| 12                                             | 3.04 | In the taxon's introduced range, are there known adverse impacts to ecosystem                                                                                           | Yes      | Transmit diseases                                                                                                                                                                                                                                                                                                                                                                                                                                                                                                                                                                               | Medium     |
| 13                                             | 3.05 | In the taxon's introduced range, are there known adverse socio-economic impacts?                                                                                        | Yes      | Channel catfish in the James River estuary in Virginia were reported to prey on blue crab ( <i>Callinectes sapidus</i> ) and white perch ( <i>Morone americana</i> ) and are known to eat the spawn of many other commercial sport and fishery species, including Atlantic shad ( <i>Alosa sapidissima</i> ), blueback herring ( <i>A. aestivalis</i> ), alewife ( <i>A. pseudoharengus</i> ) (Menzel, 1945). McGovern and Olney (1988) found <i>M. americana</i> eggs and <i>M. saxatilis</i> eggs and larvae in gut contents of juvenile channel catfish from the Pamunkey River in Virginia. | Very high  |
| B. Biology/Ecology                             |      |                                                                                                                                                                         |          |                                                                                                                                                                                                                                                                                                                                                                                                                                                                                                                                                                                                 |            |
| 4. Undesirable (or persistence) traits         |      |                                                                                                                                                                         |          |                                                                                                                                                                                                                                                                                                                                                                                                                                                                                                                                                                                                 |            |
| 14                                             | 4.01 | Is it likely that the taxon will be poisonous or pose other risks to human health?                                                                                      | No       | Not poisonous                                                                                                                                                                                                                                                                                                                                                                                                                                                                                                                                                                                   | Very high  |
| 15                                             | 4.02 | Is it likely that the taxon will smother one or more native taxa (that are not threatened or protected)?                                                                | Yes      | threatenes vulnerable and endangered species such as <i>Rana chiricahuensis</i> ( <i>Chiricahua</i> leopard frog) and <i>Gila cypha</i> and others<br><a href="https://www.cabi.org/isc/datasheet/79127#tothreatenedSpecies">https://www.cabi.org/isc/datasheet/79127#tothreatenedSpecies</a>                                                                                                                                                                                                                                                                                                   | High       |
| 16                                             | 4.03 | Are there any threatened or protected taxa that the non-native taxon would parasitise in the RA area?                                                                   | No       | Does not parasite                                                                                                                                                                                                                                                                                                                                                                                                                                                                                                                                                                               | Very high  |
| 17                                             | 4.04 | Is the taxon adaptable in terms of climatic and other environmental conditions, thus enhancing its potential persistence if it has invaded or could invade the RA area? | Yes      | It was documented that this species was breeding independently in Georgia (Goradze et al 2012)                                                                                                                                                                                                                                                                                                                                                                                                                                                                                                  | High       |

|                                 |      |                                                                                                                                                                 |     |                                                                                                                                                                                                                                                                                                                                                                                                                                                                                                                                                                                              |           |
|---------------------------------|------|-----------------------------------------------------------------------------------------------------------------------------------------------------------------|-----|----------------------------------------------------------------------------------------------------------------------------------------------------------------------------------------------------------------------------------------------------------------------------------------------------------------------------------------------------------------------------------------------------------------------------------------------------------------------------------------------------------------------------------------------------------------------------------------------|-----------|
| 18                              | 4.05 | Is the taxon likely to disrupt food-web structure/function in aquatic ecosystems if it has invaded or is likely to invade the RA area?                          | Yes | Larval stages feed on midge larvae and pupae. Channel catfish smaller than 102 mm total length (TL) feed primarily on insects; while those larger than 102 mm TL continue to feed on aquatic insects, they also begin to feed on large species of mayflies and caddis flies. Larger fish tend to feed on terrestrial insects, seeds (from elm and cottonwood trees), crayfish, aquatic insect nymphs, snakes, birds, spiders and plant matter<br><a href="https://www.cabi.org/isc/datasheet/79127#toththreatenedSpecies">https://www.cabi.org/isc/datasheet/79127#toththreatenedSpecies</a> | High      |
| 19                              | 4.06 | Is the taxon likely to exert adverse impacts on ecosystem services in the RA area?                                                                              | No  | Transmit diseases                                                                                                                                                                                                                                                                                                                                                                                                                                                                                                                                                                            | Low       |
| 20                              | 4.07 | Is it likely that the taxon will host, and/or act as a vector for, recognised pests and infectious agents that are endemic in the RA area?                      | Yes | No information                                                                                                                                                                                                                                                                                                                                                                                                                                                                                                                                                                               | Low       |
| 21                              | 4.08 | Is it likely that the taxon will host, and/or act as a vector for, recognised pests and infectious agents that are absent from (novel to) the RA area?          | Yes | No info                                                                                                                                                                                                                                                                                                                                                                                                                                                                                                                                                                                      | Low       |
| 22                              | 4.09 | Is it likely that the taxon will achieve a body size that will make it more likely to be released from captivity?                                               | Yes | Yes. See: <a href="https://www.fishbase.se/summary/Ictalurus-punctatus.html">https://www.fishbase.se/summary/Ictalurus-punctatus.html</a>                                                                                                                                                                                                                                                                                                                                                                                                                                                    | Very high |
| 23                              | 4.10 | Is the taxon capable of sustaining itself in a range of water velocity conditions (e.g. versatile in habitat use)?                                              | No  | Juveniles prefer depths of 50-70 cm while adults go for the deepest water possible (Holland and Peters, 1992); both juveniles and adults prefer areas of slow to moderate currents e.g. less than 60 cm/sec (Holland and Peters, 1992). McMahon and Terrell (1982) however report that current velocities of less than 15 cm/sec are preferred in deep ponds and backwaters and optimal turbidity levels of below 100 ppm.                                                                                                                                                                   | Medium    |
| 24                              | 4.11 | Is it likely that the taxon's mode of existence (e.g. excretion of by-products) or behaviours (e.g. feeding) will reduce habitat quality for native taxa?       | No  | No expectation based on professional judgement                                                                                                                                                                                                                                                                                                                                                                                                                                                                                                                                               | Medium    |
| 25                              | 4.12 | Is the taxon likely to maintain a viable population even when present in low densities (or persisting in adverse conditions by way of a dormant form)?          | Yes | It is possible                                                                                                                                                                                                                                                                                                                                                                                                                                                                                                                                                                               | Low       |
| <b>5. Resource exploitation</b> |      |                                                                                                                                                                 |     |                                                                                                                                                                                                                                                                                                                                                                                                                                                                                                                                                                                              |           |
| 26                              | 5.01 | Is the taxon likely to consume threatened or protected native taxa in the RA area?                                                                              | Yes | It is possible however there is no information about it                                                                                                                                                                                                                                                                                                                                                                                                                                                                                                                                      | Low       |
| 27                              | 5.02 | Is the taxon likely to sequester food resources (including nutrients) to the detriment of native taxa in the RA area?                                           | Yes | Yes it is possible                                                                                                                                                                                                                                                                                                                                                                                                                                                                                                                                                                           | Medium    |
| <b>6. Reproduction</b>          |      |                                                                                                                                                                 |     |                                                                                                                                                                                                                                                                                                                                                                                                                                                                                                                                                                                              |           |
| 28                              | 6.01 | Is the taxon likely to exhibit parental care and/or to reduce age-at-maturity in response to environmental conditions?                                          | Yes | males guard the nests                                                                                                                                                                                                                                                                                                                                                                                                                                                                                                                                                                        | Very high |
| 29                              | 6.02 | Is the taxon likely to produce viable gametes or propagules (in the RA area)?                                                                                   | Yes | "In some trial water bodies, the natural breeding of channel catfishes were observed, proving the existence of independent (self-breeding) population" (Goradze et al 2012)                                                                                                                                                                                                                                                                                                                                                                                                                  | Low       |
| 30                              | 6.03 | Is the taxon likely to hybridise naturally with native taxa?                                                                                                    | Yes | The channel catfish hybridizes with the threatened Yaqui catfish ( <i>Ictalurus pricei</i> ) in Mexico (Sublette et al., 1990; Kelsch and Jensen, 1997) while in New Mexico, it hybridizes with the native headwater catfish ( <i>I. lupus</i> ) (Kelsch and Hendricks, 1990).<br><a href="https://www.cabi.org/isc/datasheet/79127#toththreatenedSpecies">https://www.cabi.org/isc/datasheet/79127#toththreatenedSpecies</a>                                                                                                                                                                | High      |
| 31                              | 6.04 | Is the taxon likely to be hermaphroditic or to display asexual reproduction?                                                                                    | No  | No. Does not display asexual reproduction                                                                                                                                                                                                                                                                                                                                                                                                                                                                                                                                                    | Very high |
| 32                              | 6.05 | Is the taxon dependent on the presence of another taxon (or specific habitat features) to complete its life cycle?                                              | No  | No. See: <a href="https://www.fishbase.se/summary/Ictalurus-punctatus.html">https://www.fishbase.se/summary/Ictalurus-punctatus.html</a>                                                                                                                                                                                                                                                                                                                                                                                                                                                     | Very high |
| 33                              | 6.06 | Is the taxon known (or likely) to produce a large number of propagules or offspring within a short time span (e.g. < 1 year)?                                   | Yes | can produce 20,000 eggs                                                                                                                                                                                                                                                                                                                                                                                                                                                                                                                                                                      | Medium    |
| 34                              | 6.07 | How many time units (days, months, years) does the taxon require to reach the age-at-first-reproduction?                                                        | 2   | 2-3 years                                                                                                                                                                                                                                                                                                                                                                                                                                                                                                                                                                                    | Very high |
| <b>7. Dispersal mechanisms</b>  |      |                                                                                                                                                                 |     |                                                                                                                                                                                                                                                                                                                                                                                                                                                                                                                                                                                              |           |
| 35                              | 7.01 | How many potential internal vectors/pathways could the taxon use to disperse within the RA area (with suitable vectors)?                                        | One | Aquaculture                                                                                                                                                                                                                                                                                                                                                                                                                                                                                                                                                                                  | Very high |
| 36                              | 7.02 | Will any of these vectors/pathways bring the taxon in close proximity to one or more protected areas (e.g. MCZ, MPA, SSSI)?                                     | Yes | It is likely                                                                                                                                                                                                                                                                                                                                                                                                                                                                                                                                                                                 | Medium    |
| 37                              | 7.03 | Does the taxon have a means of actively attaching itself to hard substrata (e.g. ship hulls, pilings, buoys) such that it enhances the likelihood of dispersal? | No  | No. Morphologically this species does not have a means of actively attaching itself to hard substrata                                                                                                                                                                                                                                                                                                                                                                                                                                                                                        | Very high |
| 38                              | 7.04 | Is natural dispersal of the taxon likely to occur as eggs (for animals) or as propagules (for plants: seeds, spores) in the RA area?                            | No  | No. can not be distributed as eggs.                                                                                                                                                                                                                                                                                                                                                                                                                                                                                                                                                          | Very high |
| 39                              | 7.05 | Is natural dispersal of the taxon likely to occur as larvae/juveniles (for animals) or as fragments/seedlings (for plants) in the RA area?                      | No  | No. Less likely                                                                                                                                                                                                                                                                                                                                                                                                                                                                                                                                                                              | Very high |
| 40                              | 7.06 | Are older life stages of the taxon likely to migrate in the RA area for reproduction?                                                                           | No  | Does not migrate for reproduction                                                                                                                                                                                                                                                                                                                                                                                                                                                                                                                                                            | Very high |



|                                |      |                                                                                                                                                                              |          |                                                                                                                                                                                                                                                      |           |
|--------------------------------|------|------------------------------------------------------------------------------------------------------------------------------------------------------------------------------|----------|------------------------------------------------------------------------------------------------------------------------------------------------------------------------------------------------------------------------------------------------------|-----------|
| 41                             | 7.07 | Are propagules or eggs of the taxon likely to be dispersed in the RA area by other animals?                                                                                  | No       | No. Can not be dispersed by other animals                                                                                                                                                                                                            | Very high |
| 42                             | 7.08 | Is dispersal of the taxon along any of the vectors/pathways mentioned in the previous seven questions (35–41; i.e. both unintentional or intentional) likely to be           | No       | Not rapid                                                                                                                                                                                                                                            | Very high |
| 43                             | 7.09 | Is dispersal of the taxon density dependent?                                                                                                                                 | Yes      | It is possible                                                                                                                                                                                                                                       | Low       |
| <b>8. Tolerance attributes</b> |      |                                                                                                                                                                              |          |                                                                                                                                                                                                                                                      |           |
| 44                             | 8.01 | Is the taxon able to withstand being out of water for extended periods (e.g. minimum of one or more hours) at some stage of its life cycle?                                  | No       | No information available                                                                                                                                                                                                                             | Very high |
| 45                             | 8.02 | Is the taxon tolerant of a wide range of water quality conditions relevant to that taxon? [In the Justification field, indicate the relevant water quality variable(s) being | Yes      | temperature, dissolved oxygen<br><a href="https://www.cabi.org/isc/datasheet/79127#tothreatenedSpecies">https://www.cabi.org/isc/datasheet/79127#tothreatenedSpecies</a>                                                                             | Medium    |
| 46                             | 8.03 | Can the taxon be controlled or eradicated in the wild with chemical, biological, or other agents/means?                                                                      | Yes      | it is possible but it is very costly and sometimes ineffective                                                                                                                                                                                       | Low       |
| 47                             | 8.04 | Is the taxon likely to tolerate or benefit from environmental/human disturbance?                                                                                             | No       | No information available                                                                                                                                                                                                                             | High      |
| 48                             | 8.05 | Is the taxon able to tolerate salinity levels that are higher or lower than those found in its usual environment?                                                            | No       | No documentation                                                                                                                                                                                                                                     | High      |
| 49                             | 8.06 | Are there effective natural enemies (predators) of the taxon present in the RA                                                                                               | No       | No. No effective natural enemies present in RA area                                                                                                                                                                                                  | Very high |
| <b>C. Climate change</b>       |      |                                                                                                                                                                              |          |                                                                                                                                                                                                                                                      |           |
| <b>9. Climate change</b>       |      |                                                                                                                                                                              |          |                                                                                                                                                                                                                                                      |           |
| 50                             | 9.01 | Under the predicted future climatic conditions, are the risks of entry into the RA area posed by the taxon likely to increase, decrease or not change?                       | Increase | It was hypothesized that climate change might alert the mechanisms of transportation and introduction of non-native species. Commercial and recreational activities will increase, that itself increases the propagule pressure levels of non-native | Very high |
| 51                             | 9.02 | Under the predicted future climatic conditions, are the risks of establishment posed by the taxon likely to increase, decrease or not change?                                | Increase | Increase                                                                                                                                                                                                                                             | High      |
| 52                             | 9.03 | Under the predicted future climatic conditions, are the risks of dispersal within the RA area posed by the taxon likely to increase, decrease or not change?                 | Increase | Increase                                                                                                                                                                                                                                             | High      |
| 53                             | 9.04 | Under the predicted future climatic conditions, what is the likely magnitude of future potential impacts on biodiversity and/or ecological integrity/status?                 | Higher   | Higher                                                                                                                                                                                                                                               | Very high |
| 54                             | 9.05 | Under the predicted future climatic conditions, what is the likely magnitude of future potential impacts on ecosystem structure and/or function?                             | Higher   | Higher                                                                                                                                                                                                                                               | Medium    |
| 55                             | 9.06 | Under the predicted future climatic conditions, what is the likely magnitude of future potential impacts on ecosystem services/socio-economic factors?                       | Higher   | higher                                                                                                                                                                                                                                               | High      |

| Statistics                                     |             |
|------------------------------------------------|-------------|
| Scores                                         |             |
| <b>BRA</b>                                     | <b>33.0</b> |
| <b>BRA Outcome</b>                             | <b>-</b>    |
| <b>BRA+CCA</b>                                 | <b>45.0</b> |
| <b>BRA+CCA Outcome</b>                         | <b>-</b>    |
| Score partition                                |             |
| <b>A. Biogeography/Historical</b>              | <b>20.0</b> |
| 1. Domestication/Cultivation                   | 2.0         |
| 2. Climate, distribution and introduction risk | 0.0         |
| 3. Invasive elsewhere                          | 18.0        |
| <b>B. Biology/Ecology</b>                      | <b>13.0</b> |
| 4. Undesirable (or persistence) traits         | 7.0         |
| 5. Resource exploitation                       | 7.0         |
| 6. Reproduction                                | 4.0         |
| 7. Dispersal mechanisms                        | -3.0        |
| 8. Tolerance attributes                        | -2.0        |
| <b>C. Climate change</b>                       | <b>12.0</b> |
| 9. Climate change                              | 12.0        |
| Answered Questions                             |             |
| <b>Total</b>                                   | <b>55</b>   |
| <b>A. Biogeography/Historical</b>              | <b>13</b>   |
| 1. Domestication/Cultivation                   | 3           |
| 2. Climate, distribution and introduction risk | 5           |
| 3. Invasive elsewhere                          | 5           |
| <b>B. Biology/Ecology</b>                      | <b>36</b>   |
| 4. Undesirable (or persistence) traits         | 12          |
| 5. Resource exploitation                       | 2           |
| 6. Reproduction                                | 7           |
| 7. Dispersal mechanisms                        | 9           |
| 8. Tolerance attributes                        | 6           |
| <b>C. Climate change</b>                       | <b>6</b>    |

|                                       |    |
|---------------------------------------|----|
| 9. Climate change                     | 6  |
| <b>Sectors affected</b>               |    |
| Commercial                            | 17 |
| Environmental                         | 15 |
| Species or population nuisance traits | 14 |

|                   |      |
|-------------------|------|
| <b>Thresholds</b> |      |
| BRA               | -    |
| BRA+CCA           | -    |
| <b>Confidence</b> |      |
| BRA+CCA           | 0.75 |
| BRA               | 0.74 |
| CCA               | 0.79 |

|                      |  |
|----------------------|--|
| <b>Date and Time</b> |  |
| 22/05/2022 21:59:41  |  |

AS-ISK v2

| Taxon and Assessor details         |                                                                                                                           |
|------------------------------------|---------------------------------------------------------------------------------------------------------------------------|
| Category                           | Fishes and Lampreys (freshwater)                                                                                          |
| Taxon name                         | <i>Lepomis gibbosus</i>                                                                                                   |
| Common name                        | pumpkinseed                                                                                                               |
| Assessor                           | Bella Japoshvili                                                                                                          |
| Risk screening context             |                                                                                                                           |
| Reason and socio-economic benefits | The species extensively used for different purpose in EU and introduced/established in many                               |
| Risk assessment area               | South Caucasus                                                                                                            |
| Taxonomy                           | Actinopteri (ray-finned fishes) > Centrarchiformes (Basses) > Centrarchidae (Sunfishes)                                   |
| Native range                       | USA                                                                                                                       |
| Introduced range                   | Parts of Europe, Middle east                                                                                              |
| URL                                | <a href="https://www.fishbase.de/summary/Lepomis-gibbosus.html">https://www.fishbase.de/summary/Lepomis-gibbosus.html</a> |

|                                                |      |                                                                                                                                                                         | Response | Justification (references and/or other information)                                                                                                                                                                                                                                                                                                    | Confidence |
|------------------------------------------------|------|-------------------------------------------------------------------------------------------------------------------------------------------------------------------------|----------|--------------------------------------------------------------------------------------------------------------------------------------------------------------------------------------------------------------------------------------------------------------------------------------------------------------------------------------------------------|------------|
| A. Biogeography/Historical                     |      |                                                                                                                                                                         |          |                                                                                                                                                                                                                                                                                                                                                        |            |
| 1. Domestication/Cultivation                   |      |                                                                                                                                                                         |          |                                                                                                                                                                                                                                                                                                                                                        |            |
| 1                                              | 1.01 | Has the taxon been the subject of domestication (or cultivation) for at least 20 generations?                                                                           | Yes      | CABI, 2021. <i>Lepomis gibbosus</i> (pumpkinseed). <a href="https://www.cabi.org/isc/datasheet/77080">https://www.cabi.org/isc/datasheet/77080</a> (accessed November 2021)                                                                                                                                                                            | Very high  |
| 2                                              | 1.02 | Is the taxon harvested in the wild and likely to be sold or used in its live form?                                                                                      | Yes      | The species is a subject of recreationa fisheries and they are captured in wild and transported to new areas                                                                                                                                                                                                                                           | High       |
| 3                                              | 1.03 | Does the taxon have invasive races, varieties, sub-taxa or congeners?                                                                                                   | Yes      | Congeners                                                                                                                                                                                                                                                                                                                                              | High       |
| 2. Climate, distribution and introduction risk |      |                                                                                                                                                                         |          |                                                                                                                                                                                                                                                                                                                                                        |            |
| 4                                              | 2.01 | How similar are the climatic conditions of the Risk Assessment (RA) area and the taxon's native range?                                                                  | Medium   | Results of climatch algorithm                                                                                                                                                                                                                                                                                                                          | Medium     |
| 5                                              | 2.02 | What is the quality of the climate matching data?                                                                                                                       | Low      | Due to low accuracy of lcal climate data                                                                                                                                                                                                                                                                                                               | High       |
| 6                                              | 2.03 | Is the taxon already present outside of captivity in the RA area?                                                                                                       | No       | CABI, 2021. <i>Lepomis gibbosus</i> (pumpkinseed). <a href="https://www.cabi.org/isc/datasheet/77080">https://www.cabi.org/isc/datasheet/77080</a> (accessed November 2021)                                                                                                                                                                            | Very high  |
| 7                                              | 2.04 | How many potential vectors could the taxon use to enter in the RA area?                                                                                                 | >1       | Aquacluture, recreation                                                                                                                                                                                                                                                                                                                                | High       |
| 8                                              | 2.05 | Is the taxon currently found in close proximity to, and likely to enter into, the RA area in the near future (e.g. unintentional and intentional introductions)?        | Yes      | Established in neighbour country (Turkey) - Ağdamar, S., Tarkan, A. S., Keskin, E., Top, N., Doğaç, E., Baysal, Ö., & Emiroğlu, Ö. (2015). The role of environmental factors and genetic diversity on colonization success of a non-native fish, <i>Lepomis gibbosus</i> from western part of Turkey. <i>Biochemical Systematics and Ecology</i> , 58, | High       |
| 3. Invasive elsewhere                          |      |                                                                                                                                                                         |          |                                                                                                                                                                                                                                                                                                                                                        |            |
| 9                                              | 3.01 | Has the taxon become naturalised (established viable populations) outside its native range?                                                                             | Yes      | CABI, 2021. <i>Lepomis gibbosus</i> (pumpkinseed). <a href="https://www.cabi.org/isc/datasheet/77080">https://www.cabi.org/isc/datasheet/77080</a> (accessed November 2021)                                                                                                                                                                            | Very high  |
| 10                                             | 3.02 | In the taxon's introduced range, are there known adverse impacts to wild stocks or commercial taxa?                                                                     | No       | No documented evidence exist                                                                                                                                                                                                                                                                                                                           | Medium     |
| 11                                             | 3.03 | In the taxon's introduced range, are there known adverse impacts to aquaculture?                                                                                        | No       | No documented evidence exist                                                                                                                                                                                                                                                                                                                           | Low        |
| 12                                             | 3.04 | In the taxon's introduced range, are there known adverse impacts to ecosystem                                                                                           | No       | No documented evidence exist                                                                                                                                                                                                                                                                                                                           | Medium     |
| 13                                             | 3.05 | In the taxon's introduced range, are there known adverse socio-economic impacts?                                                                                        | No       | No documented evidence exist                                                                                                                                                                                                                                                                                                                           | Medium     |
| B. Biology/Ecology                             |      |                                                                                                                                                                         |          |                                                                                                                                                                                                                                                                                                                                                        |            |
| 4. Undesirable (or persistence) traits         |      |                                                                                                                                                                         |          |                                                                                                                                                                                                                                                                                                                                                        |            |
| 14                                             | 4.01 | Is it likely that the taxon will be poisonous or pose other risks to human health?                                                                                      | No       | Not a harmful species                                                                                                                                                                                                                                                                                                                                  | High       |
| 15                                             | 4.02 | Is it likely that the taxon will smother one or more native taxa (that are not threatened or protected)?                                                                | Yes      | Since the species can reach high density and is oportunistic feeder                                                                                                                                                                                                                                                                                    | Medium     |
| 16                                             | 4.03 | Are there any threatened or protected taxa that the non-native taxon would parasitise in the RA area?                                                                   | Yes      | It can consume ;variety of foods including fish eggs and juveniles thus predate on many different threatend taxa                                                                                                                                                                                                                                       | High       |
| 17                                             | 4.04 | Is the taxon adaptable in terms of climatic and other environmental conditions, thus enhancing its potential persistence if it has invaded or could invade the RA area? | Yes      | Is considered warmwater species while is established in northern European countries                                                                                                                                                                                                                                                                    | High       |
| 18                                             | 4.05 | Is the taxon likely to disrupt food-web structure/function in aquatic ecosystems if it has invaded or is likely to invade the RA                                        | Yes      | Expected but not documented                                                                                                                                                                                                                                                                                                                            | Low        |
| 19                                             | 4.06 | Is the taxon likely to exert adverse impacts on ecosystem services in the RA area?                                                                                      | Yes      | Possible due to its lifestyle and aggressive spread, however not well documented elsewhere                                                                                                                                                                                                                                                             | Low        |
| 20                                             | 4.07 | Is it likely that the taxon will host, and/or act as a vector for, recognised pests and infectious agents that are endemic in the RA                                    | No       | Not expected                                                                                                                                                                                                                                                                                                                                           | High       |
| 21                                             | 4.08 | Is it likely that the taxon will host, and/or act as a vector for, recognised pests and infectious agents that are absent from (novel to) the RA area?                  | Yes      | It hosts a number of parasatises/deaseaze that are absent in the region                                                                                                                                                                                                                                                                                | High       |
| 22                                             | 4.09 | Is it likely that the taxon will achieve a body size that will make it more likely to be released from captivity?                                                       | No       | Small bodied species                                                                                                                                                                                                                                                                                                                                   | High       |

|                                 |      |                                                                                                                                                                              |     |                                                                                                                                                                                                                                                                                                                                                        |           |
|---------------------------------|------|------------------------------------------------------------------------------------------------------------------------------------------------------------------------------|-----|--------------------------------------------------------------------------------------------------------------------------------------------------------------------------------------------------------------------------------------------------------------------------------------------------------------------------------------------------------|-----------|
| 23                              | 4.10 | Is the taxon capable of sustaining itself in a range of water velocity conditions (e.g. versatile in habitat use)?                                                           | No  | Avoids fast flowing rivers                                                                                                                                                                                                                                                                                                                             | High      |
| 24                              | 4.11 | Is it likely that the taxon's mode of existence (e.g. excretion of by-products) or behaviours (e.g. feeding) will reduce habitat quality for native taxa?                    | No  | No documented evidence exists                                                                                                                                                                                                                                                                                                                          | Low       |
| 25                              | 4.12 | Is the taxon likely to maintain a viable population even when present in low densities (or persisting in adverse conditions by way of a dormant form)?                       | No  | No documented evidence exists                                                                                                                                                                                                                                                                                                                          | Medium    |
| <b>5. Resource exploitation</b> |      |                                                                                                                                                                              |     |                                                                                                                                                                                                                                                                                                                                                        |           |
| 26                              | 5.01 | Is the taxon likely to consume threatened or protected native taxa in the RA area?                                                                                           | Yes | e.g. García-Berthou E; Moreno-Amich R, 2000. Food of introduced pumpkinseed sunfish: ontogenetic diet shift and seasonal variation. <i>Journal of Fish Biology</i> , 57(1):29-40.                                                                                                                                                                      | Medium    |
| 27                              | 5.02 | Is the taxon likely to sequester food resources (including nutrients) to the detriment of native taxa in the RA area?                                                        | Yes | Because species can develop dense populations                                                                                                                                                                                                                                                                                                          | Medium    |
| <b>6. Reproduction</b>          |      |                                                                                                                                                                              |     |                                                                                                                                                                                                                                                                                                                                                        |           |
| 28                              | 6.01 | Is the taxon likely to exhibit parental care and/or to reduce age-at-maturity in response to environmental conditions?                                                       | Yes | Gross, M.R. and R.C. Sargent, 1985. The evolution of male and female parental care in fishes. <i>Am. Zool.</i> 25(3):807-822.                                                                                                                                                                                                                          | Very high |
| 29                              | 6.02 | Is the taxon likely to produce viable gametes or propagules (in the RA area)?                                                                                                | Yes | Expected but not documented evidence                                                                                                                                                                                                                                                                                                                   | Low       |
| 30                              | 6.03 | Is the taxon likely to hybridise naturally with native taxa?                                                                                                                 | Yes | CABI, 2021. <i>Lepomis gibbosus</i> (pumpkinseed). <a href="https://www.cabi.org/isc/datasheet/77080">https://www.cabi.org/isc/datasheet/77080</a> (accessed November 2021)                                                                                                                                                                            | High      |
| 31                              | 6.04 | Is the taxon likely to be hermaphroditic or to display asexual reproduction?                                                                                                 | No  | Species is reproducing sexually ( <a href="https://www.fishbase.se/">https://www.fishbase.se/</a> )                                                                                                                                                                                                                                                    | Very high |
| 32                              | 6.05 | Is the taxon dependent on the presence of another taxon (or specific habitat features) to complete its life cycle?                                                           | No  | No such fact is known. It can complete its lifecycle independently                                                                                                                                                                                                                                                                                     | High      |
| 33                              | 6.06 | Is the taxon known (or likely) to produce a large number of propagules or offspring within a short time span (e.g. < 1 year)?                                                | No  | Only few thousand eggs per year                                                                                                                                                                                                                                                                                                                        | High      |
| 34                              | 6.07 | How many time units (days, months, years) does the taxon require to reach the age-at-first-reproduction?                                                                     | 1   | Years                                                                                                                                                                                                                                                                                                                                                  | Very high |
| <b>7. Dispersal mechanisms</b>  |      |                                                                                                                                                                              |     |                                                                                                                                                                                                                                                                                                                                                        |           |
| 35                              | 7.01 | How many potential internal vectors/pathways could the taxon use to disperse within the RA area (with suitable vectors)?                                                     | >1  | Intentional introduction for recreational fisheries, unintentional introduction as a hitchhiker                                                                                                                                                                                                                                                        | High      |
| 36                              | 7.02 | Will any of these vectors/pathways bring the taxon in close proximity to one or more protected areas (e.g. MCZ, MPA, SSSI)?                                                  | Yes | Colchis national park along the Black Sea is the most easily attainable                                                                                                                                                                                                                                                                                | High      |
| 37                              | 7.03 | Does the taxon have a means of actively attaching itself to hard substrata (e.g. ship hulls, pilings, buoys) such that it enhances the likelihood of dispersal?              | No  | No such beavoir is known                                                                                                                                                                                                                                                                                                                               | Very high |
| 38                              | 7.04 | Is natural dispersal of the taxon likely to occur as eggs (for animals) or as propagules (for plants: seeds, spores) in the RA area?                                         | No  | Not expected                                                                                                                                                                                                                                                                                                                                           | Very high |
| 39                              | 7.05 | Is natural dispersal of the taxon likely to occur as larvae/juveniles (for animals) or as fragments/seedlings (for plants) in the RA area?                                   | Yes | Juveniles can spread via water currents easily (Copp GH; Cellot B, 1988. Drift of embryonic and larval fishes, especially <i>lepomis gibbosus</i> (L.) in the upper Rhône river. <i>J. Freshwat. Ecol.</i> 4:419-423.)                                                                                                                                 | High      |
| 40                              | 7.06 | Are older life stages of the taxon likely to migrate in the RA area for reproduction?                                                                                        | No  | No such an vidence is known                                                                                                                                                                                                                                                                                                                            | High      |
| 41                              | 7.07 | Are propagules or eggs of the taxon likely to be dispersed in the RA area by other animals?                                                                                  | No  | Not expected and not observed                                                                                                                                                                                                                                                                                                                          | Very high |
| 42                              | 7.08 | Is dispersal of the taxon along any of the vectors/pathways mentioned in the previous seven questions (35-41; i.e. both unintentional or intentional) likely to be           | Yes | Less expected because the absence of direct water connection between RA area and the surroundings, however, human mediated introduction with large quantity is possible                                                                                                                                                                                | Low       |
| 43                              | 7.09 | Is dispersal of the taxon density dependent?                                                                                                                                 | No  | No such fact is known                                                                                                                                                                                                                                                                                                                                  | High      |
| <b>8. Tolerance attributes</b>  |      |                                                                                                                                                                              |     |                                                                                                                                                                                                                                                                                                                                                        |           |
| 44                              | 8.01 | Is the taxon able to withstand being out of water for extended periods (e.g. minimum of one or more hours) at some stage of its life cycle?                                  | No  | No such fact is known                                                                                                                                                                                                                                                                                                                                  | High      |
| 45                              | 8.02 | Is the taxon tolerant of a wide range of water quality conditions relevant to that taxon? [In the Justification field, indicate the relevant water quality variable(s) being | Yes | Salinity and temperature                                                                                                                                                                                                                                                                                                                               | Medium    |
| 46                              | 8.03 | Can the taxon be controlled or eradicated in the wild with chemical, biological, or other agents/means?                                                                      | No  | No effective eradication evidence exists                                                                                                                                                                                                                                                                                                               | Very high |
| 47                              | 8.04 | Is the taxon likely to tolerate or benefit from environmental/human disturbance?                                                                                             | Yes | Almeida D; Almodóvar A; Nicola GG; Elvira B, 2009. Feeding tactics and body condition of two introduced populations of pumpkinseed <i>Lepomis gibbosus</i> : taking advantages of human disturbances? <i>Ecology of Freshwater Fish</i> , 18(1):15-23. <a href="http://www.blackwell-synergy.com/loi/eff">http://www.blackwell-synergy.com/loi/eff</a> | Medium    |
| 48                              | 8.05 | Is the taxon able to tolerate salinity levels that are higher or lower than those found in its usual environment?                                                            | No  | No documented evidence exists                                                                                                                                                                                                                                                                                                                          | Medium    |

|                          |      |                                                                                                                                                              |           |                                                                        |           |
|--------------------------|------|--------------------------------------------------------------------------------------------------------------------------------------------------------------|-----------|------------------------------------------------------------------------|-----------|
| 49                       | 8.06 | Are there effective natural enemies (predators) of the taxon present in the RA                                                                               | No        | Based on professional judgement although no documented evidence exists | Very high |
| <b>C. Climate change</b> |      |                                                                                                                                                              |           |                                                                        |           |
| <b>9. Climate change</b> |      |                                                                                                                                                              |           |                                                                        |           |
| 50                       | 9.01 | Under the predicted future climatic conditions, are the risks of entry into the RA area posed by the taxon likely to increase, decrease or not change?       | No change | Based on professional judgement                                        | High      |
| 51                       | 9.02 | Under the predicted future climatic conditions, are the risks of establishment posed by the taxon likely to increase, decrease or not change?                | Increase  | Based on professional judgement                                        | High      |
| 52                       | 9.03 | Under the predicted future climatic conditions, are the risks of dispersal within the RA area posed by the taxon likely to increase, decrease or not change? | Increase  | Based on professional judgement                                        | High      |
| 53                       | 9.04 | Under the predicted future climatic conditions, what is the likely magnitude of future potential impacts on biodiversity and/or ecological integrity/status? | Higher    | Based on professional judgement                                        | Medium    |
| 54                       | 9.05 | Under the predicted future climatic conditions, what is the likely magnitude of future potential impacts on ecosystem structure and/or function?             | Higher    | Based on professional judgement                                        | Low       |
| 55                       | 9.06 | Under the predicted future climatic conditions, what is the likely magnitude of future potential impacts on ecosystem services/socio-economic factors?       | Higher    | Based on professional judgement                                        | Low       |

| Statistics                                     |             |
|------------------------------------------------|-------------|
| Scores                                         |             |
| <b>BRA</b>                                     | <b>28.0</b> |
| <b>BRA Outcome</b>                             | <b>-</b>    |
| <b>BRA+CCA</b>                                 | <b>38.0</b> |
| <b>BRA+CCA Outcome</b>                         | <b>-</b>    |
| Score partition                                |             |
| <b>A. Biogeography/Historical</b>              | <b>7.0</b>  |
| 1. Domestication/Cultivation                   | 4.0         |
| 2. Climate, distribution and introduction risk | 1.0         |
| 3. Invasive elsewhere                          | 2.0         |
| <b>B. Biology/Ecology</b>                      | <b>21.0</b> |
| 4. Undesirable (or persistence) traits         | 6.0         |
| 5. Resource exploitation                       | 7.0         |
| 6. Reproduction                                | 4.0         |
| 7. Dispersal mechanisms                        | 0.0         |
| 8. Tolerance attributes                        | 4.0         |
| <b>C. Climate change</b>                       | <b>10.0</b> |
| 9. Climate change                              | 10.0        |
| Answered Questions                             |             |
| <b>Total</b>                                   | <b>55</b>   |
| <b>A. Biogeography/Historical</b>              | <b>13</b>   |
| 1. Domestication/Cultivation                   | 3           |
| 2. Climate, distribution and introduction risk | 5           |
| 3. Invasive elsewhere                          | 5           |
| <b>B. Biology/Ecology</b>                      | <b>36</b>   |
| 4. Undesirable (or persistence) traits         | 12          |
| 5. Resource exploitation                       | 2           |
| 6. Reproduction                                | 7           |
| 7. Dispersal mechanisms                        | 9           |
| 8. Tolerance attributes                        | 6           |
| <b>C. Climate change</b>                       | <b>6</b>    |
| 9. Climate change                              | 6           |
| Sectors affected                               |             |
| <b>Commercial</b>                              | <b>8</b>    |
| <b>Environmental</b>                           | <b>12</b>   |
| <b>Species or population nuisance traits</b>   | <b>22</b>   |

| Thresholds     |             |
|----------------|-------------|
| <b>BRA</b>     | <b>-</b>    |
| <b>BRA+CCA</b> | <b>-</b>    |
| Confidence     |             |
| <b>BRA+CCA</b> | <b>0.67</b> |
| <b>BRA</b>     | <b>0.69</b> |
| <b>CCA</b>     | <b>0.54</b> |

| Date and Time       |
|---------------------|
| 16/05/2022 14:29:28 |

## AS-ISK v2

| Taxon and Assessor details         |                                                                                                                           |
|------------------------------------|---------------------------------------------------------------------------------------------------------------------------|
| Category                           | Fishes and Lampreys (freshwater)                                                                                          |
| Taxon name                         | <i>Lepomis gibbosus</i>                                                                                                   |
| Common name                        | pumpkinseed                                                                                                               |
| Assessor                           | Giorgi Epatashvili                                                                                                        |
| Risk screening context             |                                                                                                                           |
| Reason and socio-economic benefits | In Europe, the pumpkinseed is considered an invasive species. They were introduced to European                            |
| Risk assessment area               | South Caucasus                                                                                                            |
| Taxonomy                           | <i>Lepomis gibbosus</i> (Linnaeus, 1758)                                                                                  |
| Native range                       | North America: New Brunswick in Canada south to Savannah River in Georgia, USA; Great Lakes,                              |
| Introduced range                   | Introduced to Europe from North America in the late 1800s (Maes, 1898), <i>L. gibbosus</i> is now                         |
| URL                                | <a href="https://www.fishbase.se/summary/Lepomis-gibbosus.html">https://www.fishbase.se/summary/Lepomis-gibbosus.html</a> |

|                                                |      |                                                                                                                                                                  | Response | Justification (references and/or other information)                                                                                                                                                                                                                                                                                                                                                                                                                                                                               | Confidence |
|------------------------------------------------|------|------------------------------------------------------------------------------------------------------------------------------------------------------------------|----------|-----------------------------------------------------------------------------------------------------------------------------------------------------------------------------------------------------------------------------------------------------------------------------------------------------------------------------------------------------------------------------------------------------------------------------------------------------------------------------------------------------------------------------------|------------|
| A. Biogeography/Historical                     |      |                                                                                                                                                                  |          |                                                                                                                                                                                                                                                                                                                                                                                                                                                                                                                                   |            |
| 1. Domestication/Cultivation                   |      |                                                                                                                                                                  |          |                                                                                                                                                                                                                                                                                                                                                                                                                                                                                                                                   |            |
| 1                                              | 1.01 | Has the taxon been the subject of domestication (or cultivation) for at least 20 generations?                                                                    | Yes      | The Pumpkinseed was introduced to Europe in the 1880s for use in outdoor ponds and as aquarium fish (Hanel, 2011, CABI, 2018).                                                                                                                                                                                                                                                                                                                                                                                                    | Very high  |
| 2                                              | 1.02 | Is the taxon harvested in the wild and likely to be sold or used in its live form?                                                                               | Yes      | The pathways by which the <i>L. gibbosus</i> reached Norway are not known. Pumpkinseed is not commonly sold in aquarium shops in Oslo, but the species is occasionally imported by special order. Pet shop owners in Oslo have mentioned the Czech Republic as the most likely origin of the fish (Sterud and Jørgensen 2006).                                                                                                                                                                                                    | Medium     |
| 3                                              | 1.03 | Does the taxon have invasive races, varieties, sub-taxa or congeners?                                                                                            | Yes      | This species is invasive in Netherlands (Van Kleef et al., 2008), Portugal, Romania, Spain, UK (CABI, 2018), and potentially invasive in Germany (Nehring et al, 2015), Austria (NOBANIS, 2011), Belgium (Anseeuw et al., 2011) and Poland (Grabowska et al, 2010; NOBANIS, 2011). It seems to be able to form established populations in almost all countries in Europe                                                                                                                                                          | Very high  |
| 2. Climate, distribution and introduction risk |      |                                                                                                                                                                  |          |                                                                                                                                                                                                                                                                                                                                                                                                                                                                                                                                   |            |
| 4                                              | 2.01 | How similar are the climatic conditions of the Risk Assessment (RA) area and the taxon's native range?                                                           | Medium   | World Map of the Köppen-Geiger climate classification                                                                                                                                                                                                                                                                                                                                                                                                                                                                             | Medium     |
| 5                                              | 2.02 | What is the quality of the climate matching data?                                                                                                                | Medium   | World Map of the Köppen-Geiger climate classification                                                                                                                                                                                                                                                                                                                                                                                                                                                                             | Medium     |
| 6                                              | 2.03 | Is the taxon already present outside of captivity in the RA area?                                                                                                | No       | Currently this species does not occurring in the SC region.                                                                                                                                                                                                                                                                                                                                                                                                                                                                       | Very high  |
| 7                                              | 2.04 | How many potential vectors could the taxon use to enter in the RA area?                                                                                          | One      | This species may be introduced into the region by humans                                                                                                                                                                                                                                                                                                                                                                                                                                                                          | Medium     |
| 8                                              | 2.05 | Is the taxon currently found in close proximity to, and likely to enter into, the RA area in the near future (e.g. unintentional and intentional introductions)? | Yes      | <i>Lepomis gibbosus</i> is now established in at least 28 countries of Europe and in Turkey the species' spread has been especially rapid between 2001 and 2006, with its distribution including the following areas: Kemer Reservoir, Akçay river catchment and inland waters of the Aegean and Anatolian regions (Ozcan 2007).                                                                                                                                                                                                  | Very high  |
| 3. Invasive elsewhere                          |      |                                                                                                                                                                  |          |                                                                                                                                                                                                                                                                                                                                                                                                                                                                                                                                   |            |
| 9                                              | 3.01 | Has the taxon become naturalised (established viable populations) outside its native range?                                                                      | Yes      | <i>L. gibbosus</i> is now established in a minimum of 28 countries in Europe and Asia Minor (Copp and Fox, 2007), with a population reported for Brazil and possibly also Chile.                                                                                                                                                                                                                                                                                                                                                  | Very high  |
| 10                                             | 3.02 | In the taxon's introduced range, are there known adverse impacts to wild stocks or commercial taxa?                                                              | Yes      | The impact of <i>L. gibbosus</i> in Europe remains poorly assessed. The species has been reported to prey on fish eggs (García de Jalón et al., 1993; García-Berthou and Moreno-Amich, 2000a) as well as an endemic mollusc subspecies (García-Berthou and Moreno-Amich, 2000a), and it has been said to contribute to the decline of some indigenous fish species (Godinho and Ferreira, 1998). However, the only known study to document impacts of <i>L. gibbosus</i> on biodiversity comes from the Netherlands (van Kleef et | Very high  |
| 11                                             | 3.03 | In the taxon's introduced range, are there known adverse impacts to aquaculture?                                                                                 | No       | Data deficient                                                                                                                                                                                                                                                                                                                                                                                                                                                                                                                    | Low        |
| 12                                             | 3.04 | In the taxon's introduced range, are there known adverse impacts to ecosystem services?                                                                          | No       | There are no studies regarding the current economic costs but if thinking about the efforts to avoid loss of native species and loss of ecosystem services this cost may only grow in the future.                                                                                                                                                                                                                                                                                                                                 | Medium     |
| 13                                             | 3.05 | In the taxon's introduced range, are there known adverse socio-economic impacts?                                                                                 | Yes      | <i>L. gibbosus</i> has long been considered a pest (Künstler, 1908; Roule 1928, 1935), but there is no documented evidence of the species having an adverse effect other than public perception.                                                                                                                                                                                                                                                                                                                                  | Low        |
| B. Biology/Ecology                             |      |                                                                                                                                                                  |          |                                                                                                                                                                                                                                                                                                                                                                                                                                                                                                                                   |            |
| 4. Undesirable (or persistence) traits         |      |                                                                                                                                                                  |          |                                                                                                                                                                                                                                                                                                                                                                                                                                                                                                                                   |            |
| 14                                             | 4.01 | Is it likely that the taxon will be poisonous or pose other risks to human health?                                                                               | No       | Such a fact is not known                                                                                                                                                                                                                                                                                                                                                                                                                                                                                                          | Very high  |
| 15                                             | 4.02 | Is it likely that the taxon will smother one or more native taxa (that are not threatened or protected)?                                                         | Yes      | <i>L. gibbosus</i> is an effective competitor of native fish due to plasticity of diet, parental care behaviour which enhances reproductive success, and aggressive behaviour which can affect native species' foraging success, reproduction and microhabitat                                                                                                                                                                                                                                                                    | Very high  |
| 16                                             | 4.03 | Are there any threatened or protected taxa that the non-native taxon would parasitise in the RA area?                                                            | Yes      | There are many threatened and protected species in the SC region who would be affected by <i>L. gibbosus</i> if this species spreads in the region e.g. <i>Salmo</i> spp; <i>Acipenser</i> spp, <i>Capoeta</i> spp, <i>Huso huso</i> , <i>Luciobarbus capito</i> , etc.                                                                                                                                                                                                                                                           | Very high  |

|                                 |      |                                                                                                                                                                         |                |                                                                                                                                                                                                                                                                                                                                                                                                                                                                                                                      |           |
|---------------------------------|------|-------------------------------------------------------------------------------------------------------------------------------------------------------------------------|----------------|----------------------------------------------------------------------------------------------------------------------------------------------------------------------------------------------------------------------------------------------------------------------------------------------------------------------------------------------------------------------------------------------------------------------------------------------------------------------------------------------------------------------|-----------|
| 17                              | 4.04 | Is the taxon adaptable in terms of climatic and other environmental conditions, thus enhancing its potential persistence if it has invaded or could invade the RA area? | Yes            | L. gibbosus can tolerate a wide range of climatic conditions. It is established in all biogeographic areas (Fox et al, 2007): Continental area, Mediterranean area, Atlantic area, Black Sea area, Pannonian area, Alpine area, Macaronesian area and Steppic Area. It could establish in Boreal area, where population where recorded in Lithuania (Elvira, 2001) and Sweden ( <a href="http://www.smp.se/kronoberg/solaborre-i-asnen-vacker-oro/">http://www.smp.se/kronoberg/solaborre-i-asnen-vacker-oro/</a> ). | Very high |
| 18                              | 4.05 | Is the taxon likely to disrupt food-web structure/function in aquatic ecosystems if it has invaded or is likely to invade the RA                                        | Yes            | The probability of this is very high.                                                                                                                                                                                                                                                                                                                                                                                                                                                                                | Very high |
| 19                              | 4.06 | Is the taxon likely to exert adverse impacts on ecosystem services in the RA area?                                                                                      | Yes            | The probability of this is high.                                                                                                                                                                                                                                                                                                                                                                                                                                                                                     | High      |
| 20                              | 4.07 | Is it likely that the taxon will host, and/or act as a vector for, recognised pests and infectious agents that are endemic in the RA                                    | No             | Data deficient                                                                                                                                                                                                                                                                                                                                                                                                                                                                                                       | Low       |
| 21                              | 4.08 | Is it likely that the taxon will host, and/or act as a vector for, recognised pests and infectious agents that are absent from (novel to) the RA area?                  | Not applicable | Data deficient                                                                                                                                                                                                                                                                                                                                                                                                                                                                                                       | Low       |
| 22                              | 4.09 | Is it likely that the taxon will achieve a body size that will make it more likely to be released from captivity?                                                       | Yes            | Max length is 40.0 cm TL male/unsexed; common length : 9.9 cm TL male/unsexed; max. published weight: 630.00 g. Therefore, this species has commercial value.                                                                                                                                                                                                                                                                                                                                                        | Very high |
| 23                              | 4.10 | Is the taxon capable of sustaining itself in a range of water velocity conditions (e.g. versatile in habitat use)?                                                      | Yes            | Inhabits vegetated lakes and ponds, as well as quiet pools of creeks and small rivers.                                                                                                                                                                                                                                                                                                                                                                                                                               | Medium    |
| 24                              | 4.11 | Is it likely that the taxon's mode of existence (e.g. excretion of by-products) or behaviours (e.g. feeding) will reduce habitat quality for native taxa?               | Yes            | The pumpkinseed affects the quality of the water, increasing the levels of chlorophyll and turbidity and the concentrations of nitrogen and phosphorus.                                                                                                                                                                                                                                                                                                                                                              | Very high |
| 25                              | 4.12 | Is the taxon likely to maintain a viable population even when present in low densities (or persisting in adverse conditions by way of a dormant form)?                  | Not applicable | Data deficient                                                                                                                                                                                                                                                                                                                                                                                                                                                                                                       | Low       |
| <b>5. Resource exploitation</b> |      |                                                                                                                                                                         |                |                                                                                                                                                                                                                                                                                                                                                                                                                                                                                                                      |           |
| 26                              | 5.01 | Is the taxon likely to consume threatened or protected native taxa in the RA area?                                                                                      | Yes            | If this species spreads within the SC region the probability of this is very high.                                                                                                                                                                                                                                                                                                                                                                                                                                   | Very high |
| 27                              | 5.02 | Is the taxon likely to sequester food resources (including nutrients) to the detriment of native taxa in the RA area?                                                   | Yes            | L. gibbosus will be competitor to native species.                                                                                                                                                                                                                                                                                                                                                                                                                                                                    | Very high |
| <b>6. Reproduction</b>          |      |                                                                                                                                                                         |                |                                                                                                                                                                                                                                                                                                                                                                                                                                                                                                                      |           |
| 28                              | 6.01 | Is the taxon likely to exhibit parental care and/or to reduce age-at-maturity in response to environmental conditions?                                                  | Yes            | L. gibbosus is an effective competitor of native fish due to plasticity of diet, parental care behaviour which enhances reproductive success.                                                                                                                                                                                                                                                                                                                                                                        | Very high |
| 29                              | 6.02 | Is the taxon likely to produce viable gametes or propagules (in the RA area)?                                                                                           | No             | At this stage this species is not distributed in the SC region.                                                                                                                                                                                                                                                                                                                                                                                                                                                      | Very high |
| 30                              | 6.03 | Is the taxon likely to hybridise naturally with native taxa?                                                                                                            | No             | There is no evidence of possibility of hybridisation with native species but hybridisation within species of the same family occurs, making more difficult to distinguish between species (Misra and Holdsworth, 1972).                                                                                                                                                                                                                                                                                              | Medium    |
| 31                              | 6.04 | Is the taxon likely to be hermaphroditic or to display asexual reproduction?                                                                                            | No             | Data deficient                                                                                                                                                                                                                                                                                                                                                                                                                                                                                                       | Medium    |
| 32                              | 6.05 | Is the taxon dependent on the presence of another taxon (or specific habitat features) to complete its life cycle?                                                      | No             | No such fact has been described                                                                                                                                                                                                                                                                                                                                                                                                                                                                                      | Medium    |
| 33                              | 6.06 | Is the taxon known (or likely) to produce a large number of propagules or offspring within a short time span (e.g. < 1 year)?                                           | No             | This species produces up to 1000 eggs.                                                                                                                                                                                                                                                                                                                                                                                                                                                                               | High      |
| 34                              | 6.07 | How many time units (days, months, years) does the taxon require to reach the age-at-first-reproduction?                                                                | 2              | Pumpkinseeds usually reach sexual maturity at age 2.                                                                                                                                                                                                                                                                                                                                                                                                                                                                 | High      |
| <b>7. Dispersal mechanisms</b>  |      |                                                                                                                                                                         |                |                                                                                                                                                                                                                                                                                                                                                                                                                                                                                                                      |           |
| 35                              | 7.01 | How many potential internal vectors/pathways could the taxon use to disperse within the RA area (with suitable                                                          | One            | This species can be spread by humans for aquacultural/recreational purposes.                                                                                                                                                                                                                                                                                                                                                                                                                                         | High      |
| 36                              | 7.02 | Will any of these vectors/pathways bring the taxon in close proximity to one or more protected areas (e.g. MCZ, MPA, SSSI)?                                             | Yes            | The probability of this is high.                                                                                                                                                                                                                                                                                                                                                                                                                                                                                     | High      |
| 37                              | 7.03 | Does the taxon have a means of actively attaching itself to hard substrata (e.g. ship hulls, pilings, buoys) such that it enhances the likelihood of dispersal?         | No             | No such fact has been described.                                                                                                                                                                                                                                                                                                                                                                                                                                                                                     | High      |
| 38                              | 7.04 | Is natural dispersal of the taxon likely to occur as eggs (for animals) or as propagules (for plants: seeds, spores) in the RA area?                                    | No             | Currently this species is not found in the region.                                                                                                                                                                                                                                                                                                                                                                                                                                                                   | Very high |
| 39                              | 7.05 | Is natural dispersal of the taxon likely to occur as larvae/juveniles (for animals) or as fragments/seedlings (for plants) in the RA area?                              | No             | Currently this species is not found in the region.                                                                                                                                                                                                                                                                                                                                                                                                                                                                   | Very high |
| 40                              | 7.06 | Are older life stages of the taxon likely to migrate in the RA area for reproduction?                                                                                   | No             | Currently this species is not found in the region.                                                                                                                                                                                                                                                                                                                                                                                                                                                                   | Very high |
| 41                              | 7.07 | Are propagules or eggs of the taxon likely to be dispersed in the RA area by other animals?                                                                             | No             | Currently this species is not found in the region.                                                                                                                                                                                                                                                                                                                                                                                                                                                                   | Very high |

|                                |      |                                                                                                                                                                              |                |                                                                                                                                                                                                                                                                                                                        |           |
|--------------------------------|------|------------------------------------------------------------------------------------------------------------------------------------------------------------------------------|----------------|------------------------------------------------------------------------------------------------------------------------------------------------------------------------------------------------------------------------------------------------------------------------------------------------------------------------|-----------|
| 42                             | 7.08 | Is dispersal of the taxon along any of the vectors/pathways mentioned in the previous seven questions (35–41; i.e. both unintentional or intentional) likely to be           | Not applicable | Data deficient                                                                                                                                                                                                                                                                                                         | Low       |
| 43                             | 7.09 | Is dispersal of the taxon density dependent?                                                                                                                                 | Not applicable | Data deficient                                                                                                                                                                                                                                                                                                         | Low       |
| <b>8. Tolerance attributes</b> |      |                                                                                                                                                                              |                |                                                                                                                                                                                                                                                                                                                        |           |
| 44                             | 8.01 | Is the taxon able to withstand being out of water for extended periods (e.g. minimum of one or more hours) at some stage of its life cycle?                                  | No             | No such fact has been described.                                                                                                                                                                                                                                                                                       | High      |
| 45                             | 8.02 | Is the taxon tolerant of a wide range of water quality conditions relevant to that taxon? [In the Justification field, indicate the relevant water quality variable(s) being | Yes            | High tolerance of <i>L. gobbosus</i> would allow species to adapt in response to changes in biotic and abiotic conditions and to survive control methods as for instance: removing exemplars, draining the pond.                                                                                                       | Medium    |
| 46                             | 8.03 | Can the taxon be controlled or eradicated in the wild with chemical, biological, or other agents/means?                                                                      | Yes            | Currently there is little experience with pumpkinseed control. However, options to be explored include: decreasing depth of colonized waters by filling them with soil allowing them to occasionally dry up, introducing native competitors and predators and the use of biodegradable piscicides (Kleef et al. 2008). | Medium    |
| 47                             | 8.04 | Is the taxon likely to tolerate or benefit from environmental/human disturbance?                                                                                             | Yes            | This species has spread to many countries with the help of humans.                                                                                                                                                                                                                                                     | Very high |
| 48                             | 8.05 | Is the taxon able to tolerate salinity levels that are higher or lower than those found in its usual environment?                                                            | Yes            | In Europe <i>L. gibbosus</i> avoids swift waters and occurs in estuaries with a salinity up to 18.2 ppt.                                                                                                                                                                                                               | High      |
| 49                             | 8.06 | Are there effective natural enemies (predators) of the taxon present in the RA area?                                                                                         | Yes            | There are several potential predators distributed in the Caucasus region which can control <i>L. gibbosus</i> populations, e.g. <i>Esox lucius</i> , <i>Sander lucioperca</i> , <i>Perca fluviatilis</i> , <i>Silurus glanis</i> , <i>Salmo</i> spp. etc.                                                              | Very high |
| <b>C. Climate change</b>       |      |                                                                                                                                                                              |                |                                                                                                                                                                                                                                                                                                                        |           |
| <b>9. Climate change</b>       |      |                                                                                                                                                                              |                |                                                                                                                                                                                                                                                                                                                        |           |
| 50                             | 9.01 | Under the predicted future climatic conditions, are the risks of entry into the RA area posed by the taxon likely to increase, decrease or not change?                       | Increase       | Own judgement                                                                                                                                                                                                                                                                                                          | Medium    |
| 51                             | 9.02 | Under the predicted future climatic conditions, are the risks of establishment posed by the taxon likely to increase, decrease or not change?                                | Increase       | Own judgement                                                                                                                                                                                                                                                                                                          | Medium    |
| 52                             | 9.03 | Under the predicted future climatic conditions, are the risks of dispersal within the RA area posed by the taxon likely to increase, decrease or not change?                 | Increase       | Own judgement                                                                                                                                                                                                                                                                                                          | Medium    |
| 53                             | 9.04 | Under the predicted future climatic conditions, what is the likely magnitude of future potential impacts on biodiversity and/or ecological integrity/status?                 | Higher         | Own judgement                                                                                                                                                                                                                                                                                                          | Medium    |
| 54                             | 9.05 | Under the predicted future climatic conditions, what is the likely magnitude of future potential impacts on ecosystem structure and/or function?                             | Higher         | Own judgement                                                                                                                                                                                                                                                                                                          | Medium    |
| 55                             | 9.06 | Under the predicted future climatic conditions, what is the likely magnitude of future potential impacts on ecosystem services/socio-economic factors?                       | Higher         | Own judgement                                                                                                                                                                                                                                                                                                          | Medium    |

| Statistics                                     |             |
|------------------------------------------------|-------------|
| Scores                                         |             |
| <b>BRA</b>                                     | <b>25.5</b> |
| <b>BRA Outcome</b>                             | <b>-</b>    |
| <b>BRA+CCA</b>                                 | <b>37.5</b> |
| <b>BRA+CCA Outcome</b>                         | <b>-</b>    |
| Score partition                                |             |
| <b>A. Biogeography/Historical</b>              | <b>11.5</b> |
| 1. Domestication/Cultivation                   | 4.0         |
| 2. Climate, distribution and introduction risk | 0.0         |
| 3. Invasive elsewhere                          | 7.5         |
| <b>B. Biology/Ecology</b>                      | <b>14.0</b> |
| 4. Undesirable (or persistence) traits         | 8.0         |
| 5. Resource exploitation                       | 7.0         |
| 6. Reproduction                                | 0.0         |
| 7. Dispersal mechanisms                        | -4.0        |
| 8. Tolerance attributes                        | 3.0         |
| <b>C. Climate change</b>                       | <b>12.0</b> |
| 9. Climate change                              | 12.0        |
| Answered Questions                             |             |
| <b>Total</b>                                   | <b>55</b>   |
| <b>A. Biogeography/Historical</b>              | <b>13</b>   |
| 1. Domestication/Cultivation                   | 3           |
| 2. Climate, distribution and introduction risk | 5           |
| 3. Invasive elsewhere                          | 5           |
| <b>B. Biology/Ecology</b>                      | <b>36</b>   |
| 4. Undesirable (or persistence) traits         | 12          |
| 5. Resource exploitation                       | 2           |
| 6. Reproduction                                | 7           |
| 7. Dispersal mechanisms                        | 9           |
| 8. Tolerance attributes                        | 6           |



|                                              |           |
|----------------------------------------------|-----------|
| <b>C. Climate change</b>                     | <b>6</b>  |
| <i>9. Climate change</i>                     | 6         |
| <b>Sectors affected</b>                      |           |
| <b>Commercial</b>                            | <b>11</b> |
| <b>Environmental</b>                         | <b>13</b> |
| <b>Species or population nuisance traits</b> | <b>15</b> |

|                   |             |
|-------------------|-------------|
| <b>Thresholds</b> |             |
| <b>BRA</b>        | -           |
| <b>BRA+CCA</b>    | -           |
| <b>Confidence</b> |             |
| <b>BRA+CCA</b>    | <b>0.71</b> |
| <b>BRA</b>        | <b>0.74</b> |
| <b>CCA</b>        | <b>0.50</b> |

|                            |  |
|----------------------------|--|
| <b>Date and Time</b>       |  |
| <b>10/05/2022 19:16:55</b> |  |

## AS-ISK v2

| Taxon and Assessor details         |                                                                                                                   |
|------------------------------------|-------------------------------------------------------------------------------------------------------------------|
| Category                           | Fishes and Lampreys (freshwater)                                                                                  |
| Taxon name                         | <i>Lepomis gibbosus</i>                                                                                           |
| Common name                        | pumpkinseed                                                                                                       |
| Assessor                           | Tatia Kuljanishvili                                                                                               |
| Risk screening context             |                                                                                                                   |
| Reason and socio-economic benefits | Widely introduced in Europe and Asia                                                                              |
| Risk assessment area               | South Caucasus                                                                                                    |
| Taxonomy                           | Actinopteri (ray-finned fishes) > Centrarchiformes (Basses) > Centrarchidae                                       |
| Native range                       | The eastern North America                                                                                         |
| Introduced range                   | Europe and Asia Minor                                                                                             |
| URL                                | <a href="http://fishbase.org/summary/Lepomis-gibbosus.html">http://fishbase.org/summary/Lepomis-gibbosus.html</a> |

|                                                |      |                                                                                                                                                                         | Response | Justification (references and/or other information)                                                                                                                                                                              | Confidence |
|------------------------------------------------|------|-------------------------------------------------------------------------------------------------------------------------------------------------------------------------|----------|----------------------------------------------------------------------------------------------------------------------------------------------------------------------------------------------------------------------------------|------------|
| A. Biogeography/Historical                     |      |                                                                                                                                                                         |          |                                                                                                                                                                                                                                  |            |
| 1. Domestication/Cultivation                   |      |                                                                                                                                                                         |          |                                                                                                                                                                                                                                  |            |
| 1                                              | 1.01 | Has the taxon been the subject of domestication (or cultivation) for at least 20 generations?                                                                           | Yes      | It has been kept in aquariums                                                                                                                                                                                                    | Medium     |
| 2                                              | 1.02 | Is the taxon harvested in the wild and likely to be sold or used in its live form?                                                                                      | Yes      | Yes, this was the way how it got to Europe. They brought it as a sportfishing or ornamental object                                                                                                                               | Very high  |
| 3                                              | 1.03 | Does the taxon have invasive races, varieties, sub-taxa or congeners?                                                                                                   | Yes      | Yes. for example <i>Lepomis macrochirus</i>                                                                                                                                                                                      | Very high  |
| 2. Climate, distribution and introduction risk |      |                                                                                                                                                                         |          |                                                                                                                                                                                                                                  |            |
| 4                                              | 2.01 | How similar are the climatic conditions of the Risk Assessment (RA) area and the taxon's native range?                                                                  | High     | Climate is somehow similar. From 18 stations, 3, 4 and 9 are above the threshold 7, 8 and 9 respectively                                                                                                                         | Medium     |
| 5                                              | 2.02 | What is the quality of the climate matching data?                                                                                                                       | Medium   | The climatch data is medium                                                                                                                                                                                                      | High       |
| 6                                              | 2.03 | Is the taxon already present outside of captivity in the RA area?                                                                                                       | No       | No evidence                                                                                                                                                                                                                      | Very high  |
| 7                                              | 2.04 | How many potential vectors could the taxon use to enter in the RA area?                                                                                                 | >1       | Aquaculture (contaminant), Recreational fisheries, pet trade.                                                                                                                                                                    | High       |
| 8                                              | 2.05 | Is the taxon currently found in close proximity to, and likely to enter into, the RA area in the near future (e.g. unintentional and intentional introductions)?        | Yes      | This species exist in Turkey and it is likely to appear in the RA in the near future                                                                                                                                             | High       |
| 3. Invasive elsewhere                          |      |                                                                                                                                                                         |          |                                                                                                                                                                                                                                  |            |
| 9                                              | 3.01 | Has the taxon become naturalised (established viable populations) outside its introduced range?                                                                         | Yes      | Yes. It has been established in Europe.                                                                                                                                                                                          | Very high  |
| 10                                             | 3.02 | In the taxon's introduced range, are there known adverse impacts to wild stocks or commercial taxa?                                                                     | Yes      | It has been demonstrated that this species interacts with native species in terms of feeding, since this species is an opportunistic omnivor (Rezsú & Specziar 2006) and feeds on any available food resource (Copp et al 2017). | Very high  |
| 11                                             | 3.03 | In the taxon's introduced range, are there known adverse impacts to aquaculture?                                                                                        | Yes      | It has impact on pond aquaculture (Copp et al 2017)                                                                                                                                                                              | High       |
| 12                                             | 3.04 | In the taxon's introduced range, are there known adverse impacts to ecosystem                                                                                           | Yes      | can transmit diseases and not used for recreational fisheries                                                                                                                                                                    | Medium     |
| 13                                             | 3.05 | In the taxon's introduced range, are there known adverse socio-economic impacts?                                                                                        | No       | This subject is not well studied                                                                                                                                                                                                 | Low        |
| B. Biology/Ecology                             |      |                                                                                                                                                                         |          |                                                                                                                                                                                                                                  |            |
| 4. Undesirable (or persistence) traits         |      |                                                                                                                                                                         |          |                                                                                                                                                                                                                                  |            |
| 14                                             | 4.01 | Is it likely that the taxon will be poisonous or pose other risks to human health?                                                                                      | No       | Not poisonous                                                                                                                                                                                                                    | Very high  |
| 15                                             | 4.02 | Is it likely that the taxon will smother one or more native taxa (that are not threatened or protected)?                                                                | Yes      | It is likely                                                                                                                                                                                                                     | High       |
| 16                                             | 4.03 | Are there any threatened or protected taxa that the non-native taxon would parasitise in the RA area?                                                                   | No       | Does not parasite                                                                                                                                                                                                                | Very high  |
| 17                                             | 4.04 | Is the taxon adaptable in terms of climatic and other environmental conditions, thus enhancing its potential persistence if it has invaded or could invade the RA area? | Yes      | This species is considered as warm water fish, however the fact that it has been established into countries with cold climate such as Canada, Norway or Switzerland, we may say that it is adaptable                             | High       |
| 18                                             | 4.05 | Is the taxon likely to disrupt food-web structure/function in aquatic ecosystems if it has invaded or is likely to invade the RA area?                                  | No       | studies have documented that <i>L. gibbosus</i> and native fishes divide (Partition) food resources so we can not really say that they disrupt (Fobert et al 2011).                                                              | High       |
| 19                                             | 4.06 | Is the taxon likely to exert adverse impacts on ecosystem services in the RA area?                                                                                      | Yes      | it can transmit diseases and affect the recreational fisheries                                                                                                                                                                   | High       |
| 20                                             | 4.07 | Is it likely that the taxon will host, and/or act as a vector for, recognised pests and infectious agents that are endemic in the RA area?                              | No       | no information available                                                                                                                                                                                                         | Low        |
| 21                                             | 4.08 | Is it likely that the taxon will host, and/or act as a vector for, recognised pests and infectious agents that are absent from (novel to) the RA area?                  | Yes      | it is likely                                                                                                                                                                                                                     | Medium     |
| 22                                             | 4.09 | Is it likely that the taxon will achieve a body size that will make it more likely to be released from captivity?                                                       | Yes      | it is a small bodied fish, common length 10 cm, however individuals can reach 40 cm.                                                                                                                                             | Medium     |
| 23                                             | 4.10 | Is the taxon capable of sustaining itself in a range of water velocity conditions (e.g. versatile in habitat use)?                                                      | No       | avoids rapid waters and prefers standig waters                                                                                                                                                                                   | High       |

|                                 |      |                                                                                                                                                                              |                |                                                                                                                            |           |
|---------------------------------|------|------------------------------------------------------------------------------------------------------------------------------------------------------------------------------|----------------|----------------------------------------------------------------------------------------------------------------------------|-----------|
| 24                              | 4.11 | Is it likely that the taxon's mode of existence (e.g. excretion of by-products) or behaviours (e.g. feeding) will reduce habitat quality for native taxa?                    | No             | No information                                                                                                             | Medium    |
| 25                              | 4.12 | Is the taxon likely to maintain a viable population even when present in low densities (or persisting in adverse conditions by way of a dormant form)?                       | Yes            | Yes it is likely                                                                                                           | Medium    |
| <b>5. Resource exploitation</b> |      |                                                                                                                                                                              |                |                                                                                                                            |           |
| 26                              | 5.01 | Is the taxon likely to consume threatened or protected native taxa in the RA area?                                                                                           | Yes            | No information available                                                                                                   | Low       |
| 27                              | 5.02 | Is the taxon likely to sequester food resources (including nutrients) to the detriment of native taxa in the RA area?                                                        | No             | No. Less likely                                                                                                            | High      |
| <b>6. Reproduction</b>          |      |                                                                                                                                                                              |                |                                                                                                                            |           |
| 28                              | 6.01 | Is the taxon likely to exhibit parental care and/or to reduce age-at-maturity in response to environmental conditions?                                                       | Yes            | it is known that males build and guard nests which contributes to its successful reproduction                              | Very high |
| 29                              | 6.02 | Is the taxon likely to produce viable gametes or propagules (in the RA area)?                                                                                                | Yes            | It is possible, however, there is no information available                                                                 | Medium    |
| 30                              | 6.03 | Is the taxon likely to hybridise naturally with native taxa?                                                                                                                 | No             | No information available                                                                                                   | Very high |
| 31                              | 6.04 | Is the taxon likely to be hermaphroditic or to display asexual reproduction?                                                                                                 | No             | No. Does not display asexual reproduction                                                                                  | Very high |
| 32                              | 6.05 | Is the taxon dependent on the presence of another taxon (or specific habitat features) to complete its life cycle?                                                           | No             | No. See: <a href="http://fishbase.org/summary/Lepomis-gibbosus.html">http://fishbase.org/summary/Lepomis-gibbosus.html</a> | Very high |
| 33                              | 6.06 | Is the taxon known (or likely) to produce a large number of propagules or offspring within a short time span (e.g. < 1 year)?                                                | Yes            | can produce up to 7000 eggs                                                                                                | Medium    |
| 34                              | 6.07 | How many time units (days, months, years) does the taxon require to reach the age-at-first-reproduction?                                                                     | 3              | 2-5 years                                                                                                                  | Medium    |
| <b>7. Dispersal mechanisms</b>  |      |                                                                                                                                                                              |                |                                                                                                                            |           |
| 35                              | 7.01 | How many potential internal vectors/pathways could the taxon use to disperse within the RA area (with suitable)                                                              | > 1            | Aquaculture (contaminant), recreational fisheries, pet trade, local hobbyists                                              | Very high |
| 36                              | 7.02 | Will any of these vectors/pathways bring the taxon in close proximity to one or more protected areas (e.g. MCZ, MPA, SSSI)?                                                  | Yes            | Yes it is likely                                                                                                           | High      |
| 37                              | 7.03 | Does the taxon have a means of actively attaching itself to hard substrata (e.g. ship hulls, pilings, buoys) such that it enhances the likelihood of dispersal?              | No             | No. Morphologically this species does not have a means of actively attaching itself to hard substrata                      | Very high |
| 38                              | 7.04 | Is natural dispersal of the taxon likely to occur as eggs (for animals) or as propagules (for plants: seeds, spores) in the RA area?                                         | No             | No. can not be distributed as eggs.                                                                                        | Very high |
| 39                              | 7.05 | Is natural dispersal of the taxon likely to occur as larvae/juveniles (for animals) or as fragments/seedlings (for plants) in the RA area?                                   | Yes            | it is possible                                                                                                             | High      |
| 40                              | 7.06 | Are older life stages of the taxon likely to migrate in the RA area for reproduction?                                                                                        | No             | Does not migrate for reproduction                                                                                          | Very high |
| 41                              | 7.07 | Are propagules or eggs of the taxon likely to be dispersed in the RA area by other animals?                                                                                  | No             | No. Can not be dispersed by other animals                                                                                  | Very high |
| 42                              | 7.08 | Is dispersal of the taxon along any of the vectors/pathways mentioned in the previous seven questions (35-41; i.e. both unintentional or intentional) likely to be           | Not applicable | It has not been recorded into RA yet so this question is not applicable in this case                                       | Very high |
| 43                              | 7.09 | Is dispersal of the taxon density dependent?                                                                                                                                 | No             | No information                                                                                                             | Low       |
| <b>8. Tolerance attributes</b>  |      |                                                                                                                                                                              |                |                                                                                                                            |           |
| 44                              | 8.01 | Is the taxon able to withstand being out of water for extended periods (e.g. minimum of one or more hours) at some stage of its life cycle?                                  | No             | No information available                                                                                                   | Very high |
| 45                              | 8.02 | Is the taxon tolerant of a wide range of water quality conditions relevant to that taxon? [In the Justification field, indicate the relevant water quality variable(s) being | Yes            | temperatures and salinities                                                                                                | Very high |
| 46                              | 8.03 | Can the taxon be controlled or eradicated in the wild with chemical, biological, or other agents/means?                                                                      | Yes            | Yes, however it is costly and sometimes ineffective                                                                        | Medium    |
| 47                              | 8.04 | Is the taxon likely to tolerate or benefit from environmental/human disturbance?                                                                                             | Yes            | Yes. it is possible                                                                                                        | High      |
| 48                              | 8.05 | Is the taxon able to tolerate salinity levels that are higher or lower than those found in its usual environment?                                                            | Yes            | Yes. it is possible                                                                                                        | Low       |
| 49                              | 8.06 | Are there effective natural enemies (predators) of the taxon present in the RA                                                                                               | No             | No No effective natural enemies present in RA area                                                                         | Very high |
| <b>C. Climate change</b>        |      |                                                                                                                                                                              |                |                                                                                                                            |           |
| <b>9. Climate change</b>        |      |                                                                                                                                                                              |                |                                                                                                                            |           |

|    |      |                                                                                                                                                              |           |                                                                                                                                                                                                                                                                                                                                                                                           |           |
|----|------|--------------------------------------------------------------------------------------------------------------------------------------------------------------|-----------|-------------------------------------------------------------------------------------------------------------------------------------------------------------------------------------------------------------------------------------------------------------------------------------------------------------------------------------------------------------------------------------------|-----------|
| 50 | 9.01 | Under the predicted future climatic conditions, are the risks of entry into the RA area posed by the taxon likely to increase, decrease or not change?       | Increase  | It was hypothesized that climate change might alert the mechanisms of transportation and introduction of non-native species. Commercial and recreational activities will increase, that itself increases the propagule pressure levels of non-native species (Hellmann et al 2008). In addition studies have shown that this species establishment increases with increasing temperatures | Very high |
| 51 | 9.02 | Under the predicted future climatic conditions, are the risks of establishment posed by the taxon likely to increase, decrease or not change?                | Increase  | yes (Zieba et al 2020)                                                                                                                                                                                                                                                                                                                                                                    | Very high |
| 52 | 9.03 | Under the predicted future climatic conditions, are the risks of dispersal within the RA area posed by the taxon likely to increase, decrease or not change? | Increase  | If Commercial and recreational activities will increase, it increases the chances of its occurrence                                                                                                                                                                                                                                                                                       | Very high |
| 53 | 9.04 | Under the predicted future climatic conditions, what is the likely magnitude of future potential impacts on biodiversity and/or ecological integrity/status? | Higher    | Population densities will increase making them on one hand impossible to eradicate and on the other hand, affecting native organisms due to competition, that does not leave much resources for native ones.                                                                                                                                                                              | High      |
| 54 | 9.05 | Under the predicted future climatic conditions, what is the likely magnitude of future potential impacts on ecosystem structure and/or function?             | No change | NO change                                                                                                                                                                                                                                                                                                                                                                                 | Medium    |
| 55 | 9.06 | Under the predicted future climatic conditions, what is the likely magnitude of future potential impacts on ecosystem services/socio-economic factors?       | Higher    | It will be more difficult to eradicate and economic losses will be nonreversible                                                                                                                                                                                                                                                                                                          | High      |

| Statistics                                     |             |
|------------------------------------------------|-------------|
| Scores                                         |             |
| <b>BRA</b>                                     | <b>36.0</b> |
| <b>BRA Outcome</b>                             | <b>-</b>    |
| <b>BRA+CCA</b>                                 | <b>46.0</b> |
| <b>BRA+CCA Outcome</b>                         | <b>-</b>    |
| Score partition                                |             |
| <b>A. Biogeography/Historical</b>              | <b>19.0</b> |
| 1. Domestication/Cultivation                   | 4.0         |
| 2. Climate, distribution and introduction risk | 1.0         |
| 3. Invasive elsewhere                          | 14.0        |
| <b>B. Biology/Ecology</b>                      | <b>17.0</b> |
| 4. Undesirable (or persistence) traits         | 6.0         |
| 5. Resource exploitation                       | 5.0         |
| 6. Reproduction                                | 2.0         |
| 7. Dispersal mechanisms                        | -1.0        |
| 8. Tolerance attributes                        | 5.0         |
| <b>C. Climate change</b>                       | <b>10.0</b> |
| 9. Climate change                              | 10.0        |
| Answered Questions                             |             |
| <b>Total</b>                                   | <b>55</b>   |
| <b>A. Biogeography/Historical</b>              | <b>13</b>   |
| 1. Domestication/Cultivation                   | 3           |
| 2. Climate, distribution and introduction risk | 5           |
| 3. Invasive elsewhere                          | 5           |
| <b>B. Biology/Ecology</b>                      | <b>36</b>   |
| 4. Undesirable (or persistence) traits         | 12          |
| 5. Resource exploitation                       | 2           |
| 6. Reproduction                                | 7           |
| 7. Dispersal mechanisms                        | 9           |
| 8. Tolerance attributes                        | 6           |
| <b>C. Climate change</b>                       | <b>6</b>    |
| 9. Climate change                              | 6           |
| Sectors affected                               |             |
| <b>Commercial</b>                              | <b>15</b>   |
| <b>Environmental</b>                           | <b>13</b>   |
| <b>Species or population nuisance traits</b>   | <b>21</b>   |

| Thresholds     |             |
|----------------|-------------|
| <b>BRA</b>     | <b>-</b>    |
| <b>BRA+CCA</b> | <b>-</b>    |
| Confidence     |             |
| <b>BRA+CCA</b> | <b>0.75</b> |
| <b>BRA</b>     | <b>0.74</b> |
| <b>CCA</b>     | <b>0.83</b> |

| Date and Time       |  |
|---------------------|--|
| 21/05/2022 14:46:55 |  |

AS-ISK v2

| Taxon and Assessor details         |                                                                                                                                     |
|------------------------------------|-------------------------------------------------------------------------------------------------------------------------------------|
| Category                           | Fishes and Lampreys (freshwater)                                                                                                    |
| Taxon name                         | <i>Micropterus salmoides</i>                                                                                                        |
| Common name                        | largemouth bass                                                                                                                     |
| Assessor                           | Bella Japoshvili                                                                                                                    |
| Risk screening context             |                                                                                                                                     |
| Reason and socio-economic benefits | The species is known as worldwide invasive though important game fish. Not yet reported from RA                                     |
| Risk assessment area               | South Caucasus                                                                                                                      |
| Taxonomy                           | Actinopteri (ray-finned fishes) > Centrarchiformes (Basses) > Centrarchidae (Sunfishes)                                             |
| Native range                       | North America                                                                                                                       |
| Introduced range                   | Worldwide                                                                                                                           |
| URL                                | <a href="https://www.fishbase.de/summary/Micropterus-salmoides.html">https://www.fishbase.de/summary/Micropterus-salmoides.html</a> |

|                                                |      |                                                                                                                                                                         | Response | Justification (references and/or other information)                                                                                                                                                                                                                                                                                                                                                                                                                                       | Confidence |
|------------------------------------------------|------|-------------------------------------------------------------------------------------------------------------------------------------------------------------------------|----------|-------------------------------------------------------------------------------------------------------------------------------------------------------------------------------------------------------------------------------------------------------------------------------------------------------------------------------------------------------------------------------------------------------------------------------------------------------------------------------------------|------------|
| A. Biogeography/Historical                     |      |                                                                                                                                                                         |          |                                                                                                                                                                                                                                                                                                                                                                                                                                                                                           |            |
| 1. Domestication/Cultivation                   |      |                                                                                                                                                                         |          |                                                                                                                                                                                                                                                                                                                                                                                                                                                                                           |            |
| 1                                              | 1.01 | Has the taxon been the subject of domestication (or cultivation) for at least 20 generations?                                                                           | Yes      | e.g. Bai, J., & Li, S. (2018). Development of largemouth bass ( <i>Micropterus salmoides</i> ) culture. <i>Aquaculture in China: Success Stories and Modern Trends</i> , 421-429.                                                                                                                                                                                                                                                                                                         | Very high  |
| 2                                              | 1.02 | Is the taxon harvested in the wild and likely to be sold or used in its live form?                                                                                      | Yes      | CABI, 2022. <i>Micropterus salmoides</i> . In: <i>Invasive Species Compendium</i> . Wallingford, UK: CAB International.                                                                                                                                                                                                                                                                                                                                                                   | High       |
| 3                                              | 1.03 | Does the taxon have invasive races, varieties, sub-taxa or congeners?                                                                                                   | Yes      | Congeneres, subspecies                                                                                                                                                                                                                                                                                                                                                                                                                                                                    | Very high  |
| 2. Climate, distribution and introduction risk |      |                                                                                                                                                                         |          |                                                                                                                                                                                                                                                                                                                                                                                                                                                                                           |            |
| 4                                              | 2.01 | How similar are the climatic conditions of the Risk Assessment (RA) area and the taxon's native range?                                                                  | High     | Result of climatch algorithm                                                                                                                                                                                                                                                                                                                                                                                                                                                              | Medium     |
| 5                                              | 2.02 | What is the quality of the climate matching data?                                                                                                                       | Low      | Due to low accuracy of local climate data                                                                                                                                                                                                                                                                                                                                                                                                                                                 | High       |
| 6                                              | 2.03 | Is the taxon already present outside of captivity in the RA area?                                                                                                       | No       | Species is not detected in RA area                                                                                                                                                                                                                                                                                                                                                                                                                                                        | Very high  |
| 7                                              | 2.04 | How many potential vectors could the taxon use to enter in the RA area?                                                                                                 | >1       | Recreation, aquacultural, biocontrol purpose (CABI, 2022. <i>Micropterus salmoides</i> . In: <i>Invasive Species Compendium</i> . Wallingford, UK: CAB International. <a href="http://www.cabi.org/isc">www.cabi.org/isc</a> .)                                                                                                                                                                                                                                                           | High       |
| 8                                              | 2.05 | Is the taxon currently found in close proximity to, and likely to enter into, the RA area in the near future (e.g. unintentional and intentional introductions)?        | No       | CABI, 2022. <i>Micropterus salmoides</i> . In: <i>Invasive Species Compendium</i> . Wallingford, UK: CAB International. <a href="http://www.cabi.org/isc">www.cabi.org/isc</a> .                                                                                                                                                                                                                                                                                                          | High       |
| 3. Invasive elsewhere                          |      |                                                                                                                                                                         |          |                                                                                                                                                                                                                                                                                                                                                                                                                                                                                           |            |
| 9                                              | 3.01 | Has the taxon become naturalised (established viable populations) outside its introduced range?                                                                         | Yes      | CABI, 2022. <i>Micropterus salmoides</i> . In: <i>Invasive Species Compendium</i> . Wallingford, UK: CAB International.                                                                                                                                                                                                                                                                                                                                                                   | Very high  |
| 10                                             | 3.02 | In the taxon's introduced range, are there known adverse impacts to wild stocks or commercial taxa?                                                                     | Yes      | Summarised in CABI, 2022. <i>Micropterus salmoides</i> . In: <i>Invasive Species Compendium</i> . Wallingford, UK: CAB International. <a href="http://www.cabi.org/isc">www.cabi.org/isc</a> ; Pereira, F. W., & Vitule, J. R. S. (2019). The largemouth bass <i>Micropterus salmoides</i> (Lacepède, 1802): impacts of a powerful freshwater fish predator outside of its native range. <i>Reviews in Fish Biology and Fisheries</i> , 29(3), 639-652.                                   | Very high  |
| 11                                             | 3.03 | In the taxon's introduced range, are there known adverse impacts to aquaculture?                                                                                        | Yes      | CABI, 2022. <i>Micropterus salmoides</i> . In: <i>Invasive Species Compendium</i> . Wallingford, UK: CAB International. <a href="http://www.cabi.org/isc">www.cabi.org/isc</a> ; Pereira, F. W., & Vitule, J. R. S. (2019). The largemouth bass <i>Micropterus salmoides</i> (Lacepède, 1802): impacts of a powerful freshwater fish predator outside of its native range. <i>Reviews in Fish Biology and Fisheries</i> , 29(3), 639-652.                                                 | Low        |
| 12                                             | 3.04 | In the taxon's introduced range, are there known adverse impacts to ecosystem?                                                                                          | No       | Not quantified                                                                                                                                                                                                                                                                                                                                                                                                                                                                            | Low        |
| 13                                             | 3.05 | In the taxon's introduced range, are there known adverse socio-economic impacts?                                                                                        | No       | Not quantified ever                                                                                                                                                                                                                                                                                                                                                                                                                                                                       | Low        |
| B. Biology/Ecology                             |      |                                                                                                                                                                         |          |                                                                                                                                                                                                                                                                                                                                                                                                                                                                                           |            |
| 4. Undesirable (or persistence) traits         |      |                                                                                                                                                                         |          |                                                                                                                                                                                                                                                                                                                                                                                                                                                                                           |            |
| 14                                             | 4.01 | Is it likely that the taxon will be poisonous or pose other risks to human health?                                                                                      | Yes      | Large specimens can cause physical damage to human by a sharp spines                                                                                                                                                                                                                                                                                                                                                                                                                      | Low        |
| 15                                             | 4.02 | Is it likely that the taxon will smother one or more native taxa (that are not threatened or protected)?                                                                | Yes      | CABI, 2022. <i>Micropterus salmoides</i> . In: <i>Invasive Species Compendium</i> . Wallingford, UK: CAB International. <a href="http://www.cabi.org/isc">www.cabi.org/isc</a> .                                                                                                                                                                                                                                                                                                          | High       |
| 16                                             | 4.03 | Are there any threatened or protected taxa that the non-native taxon would parasitise in the RA area?                                                                   | Yes      | The species is generally carnivorous preying anything including fishes. CABI, 2022. <i>Micropterus salmoides</i> . In: <i>Invasive Species Compendium</i> . Wallingford, UK: CAB International.                                                                                                                                                                                                                                                                                           | Very high  |
| 17                                             | 4.04 | Is the taxon adaptable in terms of climatic and other environmental conditions, thus enhancing its potential persistence if it has invaded or could invade the RA area? | Yes      | Mulhollem, J. J., Suski, C. D., & Wahl, D. H. (2015). Response of largemouth bass ( <i>Micropterus salmoides</i> ) from different thermal environments to increased water temperature. <i>Fish physiology and biochemistry</i> , 41(4), 833-842; Glover, D. C., DeVries, D. R., & Wright, R. A. (2012). Effects of temperature, salinity and body size on routine metabolism of coastal largemouth bass <i>Micropterus salmoides</i> . <i>Journal of Fish Biology</i> , 81(5), 1463-1478. | High       |
| 18                                             | 4.05 | Is the taxon likely to disrupt food-web structure/function in aquatic ecosystems if it has invaded or is likely to invade the RA area?                                  | Yes      | Although not a documented evidence, this is expected based on professional judgement                                                                                                                                                                                                                                                                                                                                                                                                      | Low        |
| 19                                             | 4.06 | Is the taxon likely to exert adverse impacts on ecosystem services in the RA area?                                                                                      | Yes      | Although not a documented evidence, this is expected based on professional judgement                                                                                                                                                                                                                                                                                                                                                                                                      | Low        |
| 20                                             | 4.07 | Is it likely that the taxon will host, and/or act as a vector for, recognised pests and infectious agents that are endemic in the RA area?                              | No       | Although not a documented evidence, this is expected based on professional judgement                                                                                                                                                                                                                                                                                                                                                                                                      | Low        |

|                                 |      |                                                                                                                                                                    |     |                                                                                                                                                                                                                                                                                                                                                                                                                                                                                     |           |
|---------------------------------|------|--------------------------------------------------------------------------------------------------------------------------------------------------------------------|-----|-------------------------------------------------------------------------------------------------------------------------------------------------------------------------------------------------------------------------------------------------------------------------------------------------------------------------------------------------------------------------------------------------------------------------------------------------------------------------------------|-----------|
| 21                              | 4.08 | Is it likely that the taxon will host, and/or act as a vector for, recognised pests and infectious agents that are absent from (novel to) the RA area?             | Yes | Although not a documented evidence, this is expected based on professional judgement                                                                                                                                                                                                                                                                                                                                                                                                | High      |
| 22                              | 4.09 | Is it likely that the taxon will achieve a body size that will make it more likely to be released from captivity?                                                  | Yes | Species can reach large size while it can be used in captivity                                                                                                                                                                                                                                                                                                                                                                                                                      | High      |
| 23                              | 4.10 | Is the taxon capable of sustaining itself in a range of water velocity conditions (e.g. versatile in habitat use)?                                                 | Yes | CABI, 2022. <i>Micropterus salmoides</i> . In: Invasive Species Compendium. Wallingford, UK: CAB International. <a href="http://www.cabi.org/isc">www.cabi.org/isc</a> .                                                                                                                                                                                                                                                                                                            | High      |
| 24                              | 4.11 | Is it likely that the taxon's mode of existence (e.g. excretion of by-products) or behaviours (e.g. feeding) will reduce habitat quality for native taxa?          | No  | No such case is documented                                                                                                                                                                                                                                                                                                                                                                                                                                                          | Low       |
| 25                              | 4.12 | Is the taxon likely to maintain a viable population even when present in low densities (or persisting in adverse conditions by way of a dormant form)?             | No  | No documented evidence exist                                                                                                                                                                                                                                                                                                                                                                                                                                                        | Low       |
| <b>5. Resource exploitation</b> |      |                                                                                                                                                                    |     |                                                                                                                                                                                                                                                                                                                                                                                                                                                                                     |           |
| 26                              | 5.01 | Is the taxon likely to consume threatened or protected native taxa in the RA area?                                                                                 | Yes | Species is aggressive predator (CABI, 2022. <i>Micropterus salmoides</i> . In: Invasive Species Compendium. Wallingford, UK: CAB International. <a href="http://www.cabi.org/isc">www.cabi.org/isc</a> .)                                                                                                                                                                                                                                                                           | Very high |
| 27                              | 5.02 | Is the taxon likely to sequester food resources (including nutrients) to the detriment of native taxa in the RA area?                                              | Yes | Many species in RA area are using the same ecological niche                                                                                                                                                                                                                                                                                                                                                                                                                         | Medium    |
| <b>6. Reproduction</b>          |      |                                                                                                                                                                    |     |                                                                                                                                                                                                                                                                                                                                                                                                                                                                                     |           |
| 28                              | 6.01 | Is the taxon likely to exhibit parental care and/or to reduce age-at-maturity in response to environmental conditions?                                             | Yes | Cooke, S. J., Philipp, D. P., & Weatherhead, P. J. (2002). Parental care patterns and energetics of smallmouth bass ( <i>Micropterus dolomieu</i> ) and largemouth bass ( <i>Micropterus salmoides</i> ) monitored with activity transmitters. <i>Canadian Journal of Zoology</i> .                                                                                                                                                                                                 | Very high |
| 29                              | 6.02 | Is the taxon likely to produce viable gametes or propagules (in the RA area)?                                                                                      | No  | No documented evidence exist                                                                                                                                                                                                                                                                                                                                                                                                                                                        | Low       |
| 30                              | 6.03 | Is the taxon likely to hybridise naturally with native taxa?                                                                                                       | Yes | Morizot, D. C., Calhoun, S. W., Clepper, L. L., Schmidt, M. E., Williamson, J. H., & Carmichael, G. J. (1991). Multispecies hybridization among native and introduced centrarchid basses in central Texas. <i>Transactions of the American Fisheries Society</i> , 120(3), 283-289. Also a review at CABI, 2021. <i>Micropterus salmoides</i> (Large-mouth bass). <a href="https://www.cabi.org/isc/datasheet/74846">https://www.cabi.org/isc/datasheet/74846</a> (accessed October | Medium    |
| 31                              | 6.04 | Is the taxon likely to be hermaphroditic or to display asexual reproduction?                                                                                       | No  | No such an evidence exist                                                                                                                                                                                                                                                                                                                                                                                                                                                           | High      |
| 32                              | 6.05 | Is the taxon dependent on the presence of another taxon (or specific habitat features) to complete its life cycle?                                                 | No  | The species can complete its lifecycle without any other particular species                                                                                                                                                                                                                                                                                                                                                                                                         | Very high |
| 33                              | 6.06 | Is the taxon known (or likely) to produce a large number of propagules or offspring within a short time span (e.g. < 1 year)?                                      | Yes | Only few to many thousands of eggs yearly (CABI, 2022. <i>Micropterus salmoides</i> . In: Invasive Species Compendium. Wallingford, UK: CAB International. <a href="http://www.cabi.org/isc">www.cabi.org/isc</a> .)                                                                                                                                                                                                                                                                | High      |
| 34                              | 6.07 | How many time units (days, months, years) does the taxon require to reach the age-at-first-reproduction?                                                           | 1   | Years                                                                                                                                                                                                                                                                                                                                                                                                                                                                               | Very high |
| <b>7. Dispersal mechanisms</b>  |      |                                                                                                                                                                    |     |                                                                                                                                                                                                                                                                                                                                                                                                                                                                                     |           |
| 35                              | 7.01 | How many potential internal vectors/pathways could the taxon use to disperse within the RA area (with suitable vectors/pathways)?                                  | >1  | Intentional, unintentional as well as independently                                                                                                                                                                                                                                                                                                                                                                                                                                 | High      |
| 36                              | 7.02 | Will any of these vectors/pathways bring the taxon in close proximity to one or more protected areas (e.g. MCZ, MPA, SSSI)?                                        | Yes | Colchis national park is vulnerable to the invasion of the species                                                                                                                                                                                                                                                                                                                                                                                                                  | High      |
| 37                              | 7.03 | Does the taxon have a means of actively attaching itself to hard substrata (e.g. ship hulls, pilings, buoys) such that it enhances the likelihood of dispersal?    | No  | No such a behavior have observed                                                                                                                                                                                                                                                                                                                                                                                                                                                    | Very high |
| 38                              | 7.04 | Is natural dispersal of the taxon likely to occur as eggs (for animals) or as propagules (for plants: seeds, spores) in the RA area?                               | No  | No such an evidence exists                                                                                                                                                                                                                                                                                                                                                                                                                                                          | Very high |
| 39                              | 7.05 | Is natural dispersal of the taxon likely to occur as larvae/juveniles (for animals) or as fragments/seedlings (for plants) in the RA area?                         | Yes | Juveniles are dispersing through water currents                                                                                                                                                                                                                                                                                                                                                                                                                                     | Medium    |
| 40                              | 7.06 | Are older life stages of the taxon likely to migrate in the RA area for reproduction?                                                                              | No  | Not a migrant species                                                                                                                                                                                                                                                                                                                                                                                                                                                               | High      |
| 41                              | 7.07 | Are propagules or eggs of the taxon likely to be dispersed in the RA area by other animals?                                                                        | No  | No such an evidence is known from other areas                                                                                                                                                                                                                                                                                                                                                                                                                                       | Very high |
| 42                              | 7.08 | Is dispersal of the taxon along any of the vectors/pathways mentioned in the previous seven questions (35–41; i.e. both unintentional or intentional) likely to be | Yes | Based on professional guess due to high fecundity capabilities                                                                                                                                                                                                                                                                                                                                                                                                                      | Medium    |
| 43                              | 7.09 | Is dispersal of the taxon density dependent?                                                                                                                       | No  | Not expected                                                                                                                                                                                                                                                                                                                                                                                                                                                                        | High      |
| <b>8. Tolerance attributes</b>  |      |                                                                                                                                                                    |     |                                                                                                                                                                                                                                                                                                                                                                                                                                                                                     |           |
| 44                              | 8.01 | Is the taxon able to withstand being out of water for extended periods (e.g. minimum of one or more hours) at some stage of its life cycle?                        | No  | Not a documented evidence exist                                                                                                                                                                                                                                                                                                                                                                                                                                                     | Medium    |

|                          |      |                                                                                                                                                                              |           |                                                                                |        |
|--------------------------|------|------------------------------------------------------------------------------------------------------------------------------------------------------------------------------|-----------|--------------------------------------------------------------------------------|--------|
| 45                       | 8.02 | Is the taxon tolerant of a wide range of water quality conditions relevant to that taxon? [In the Justification field, indicate the relevant water quality variable(s) being | No        | No documented evidence exists                                                  | Medium |
| 46                       | 8.03 | Can the taxon be controlled or eradicated in the wild with chemical, biological, or other agents/means?                                                                      | No        | Not a successful case is known                                                 | High   |
| 47                       | 8.04 | Is the taxon likely to tolerate or benefit from environmental/human disturbance?                                                                                             | No        | Not expected and no evidence exists                                            | Medium |
| 48                       | 8.05 | Is the taxon able to tolerate salinity levels that are higher or lower than those found in its usual environment?                                                            | No        | No documented evidence exists                                                  | Medium |
| 49                       | 8.06 | Are there effective natural enemies (predators) of the taxon present in the RA                                                                                               | No        | Based on professional experience no effective natural enemies exist in RA area | High   |
| <b>C. Climate change</b> |      |                                                                                                                                                                              |           |                                                                                |        |
| <b>9. Climate change</b> |      |                                                                                                                                                                              |           |                                                                                |        |
| 50                       | 9.01 | Under the predicted future climatic conditions, are the risks of entry into the RA area posed by the taxon likely to increase, decrease or not change?                       | No change | Based on professional judgement                                                | Low    |
| 51                       | 9.02 | Under the predicted future climatic conditions, are the risks of establishment posed by the taxon likely to increase, decrease or not change?                                | No change | Based on professional judgement                                                | Low    |
| 52                       | 9.03 | Under the predicted future climatic conditions, are the risks of dispersal within the RA area posed by the taxon likely to increase, decrease or not change?                 | No change | Based on professional judgement                                                | Low    |
| 53                       | 9.04 | Under the predicted future climatic conditions, what is the likely magnitude of future potential impacts on biodiversity and/or ecological integrity/status?                 | Higher    | Based on professional judgement                                                | Low    |
| 54                       | 9.05 | Under the predicted future climatic conditions, what is the likely magnitude of future potential impacts on ecosystem structure and/or function?                             | Higher    | Based on professional judgement                                                | Low    |
| 55                       | 9.06 | Under the predicted future climatic conditions, what is the likely magnitude of future potential impacts on ecosystem services/socio-economic factors?                       | Higher    | Based on professional judgement                                                | Low    |

| Statistics                                     |             |
|------------------------------------------------|-------------|
| Scores                                         |             |
| <b>BRA</b>                                     | <b>33.0</b> |
| <b>BRA Outcome</b>                             | <b>-</b>    |
| <b>BRA+CCA</b>                                 | <b>39.0</b> |
| <b>BRA+CCA Outcome</b>                         | <b>-</b>    |
| Score partition                                |             |
| <b>A. Biogeography/Historical</b>              | <b>15.0</b> |
| 1. Domestication/Cultivation                   | 4.0         |
| 2. Climate, distribution and introduction risk | 1.0         |
| 3. Invasive elsewhere                          | 10.0        |
| <b>B. Biology/Ecology</b>                      | <b>18.0</b> |
| 4. Undesirable (or persistence) traits         | 9.0         |
| 5. Resource exploitation                       | 7.0         |
| 6. Reproduction                                | 4.0         |
| 7. Dispersal mechanisms                        | 0.0         |
| 8. Tolerance attributes                        | -2.0        |
| <b>C. Climate change</b>                       | <b>6.0</b>  |
| 9. Climate change                              | 6.0         |
| Answered Questions                             |             |
| <b>Total</b>                                   | <b>55</b>   |
| <b>A. Biogeography/Historical</b>              | <b>13</b>   |
| 1. Domestication/Cultivation                   | 3           |
| 2. Climate, distribution and introduction risk | 5           |
| 3. Invasive elsewhere                          | 5           |
| <b>B. Biology/Ecology</b>                      | <b>36</b>   |
| 4. Undesirable (or persistence) traits         | 12          |
| 5. Resource exploitation                       | 2           |
| 6. Reproduction                                | 7           |
| 7. Dispersal mechanisms                        | 9           |
| 8. Tolerance attributes                        | 6           |
| <b>C. Climate change</b>                       | <b>6</b>    |
| 9. Climate change                              | 6           |
| Sectors affected                               |             |
| <b>Commercial</b>                              | <b>16</b>   |
| <b>Environmental</b>                           | <b>12</b>   |
| <b>Species or population nuisance traits</b>   | <b>15</b>   |

| Thresholds     |             |
|----------------|-------------|
| <b>BRA</b>     | <b>-</b>    |
| <b>BRA+CCA</b> | <b>-</b>    |
| Confidence     |             |
| <b>BRA+CCA</b> | <b>0.62</b> |
| <b>BRA</b>     | <b>0.67</b> |

|     |      |
|-----|------|
| CCA | 0.25 |
|-----|------|

|                     |
|---------------------|
| Date and Time       |
| 16/05/2022 14:49:32 |



## AS-ISK v2

| Taxon and Assessor details         |                                                                                                        |
|------------------------------------|--------------------------------------------------------------------------------------------------------|
| Category                           | Fishes and Lampreys (freshwater)                                                                       |
| Taxon name                         | <i>Micropterus salmoides</i>                                                                           |
| Common name                        | largemouth bass                                                                                        |
| Assessor                           | Giorgi Epitashvili                                                                                     |
| Risk screening context             |                                                                                                        |
| Reason and socio-economic benefits | The species is exploited heavily for angling in its native range, and was spread primarily for         |
| Risk assessment area               | South Caucasus                                                                                         |
| Taxonomy                           | <i>Micropterus salmoides</i> (Lacépède, 1802)                                                          |
| Native range                       | North America: St. Lawrence - Great Lakes, and Mississippi River basins from southern Quebec to        |
| Introduced range                   | <i>M. salmoides</i> has been introduced outside of its native range in North America to other areas of |
| URL                                | <a href="https://www.fishbase.de/summary/3385">https://www.fishbase.de/summary/3385</a>                |

|                                                |      | Response                                                                                                                                                         | Justification (references and/or other information) | Confidence                                                                                                                                                                                                                                                                                                                                                                                                                                                                                                                                                                    |           |
|------------------------------------------------|------|------------------------------------------------------------------------------------------------------------------------------------------------------------------|-----------------------------------------------------|-------------------------------------------------------------------------------------------------------------------------------------------------------------------------------------------------------------------------------------------------------------------------------------------------------------------------------------------------------------------------------------------------------------------------------------------------------------------------------------------------------------------------------------------------------------------------------|-----------|
| A. Biogeography/Historical                     |      |                                                                                                                                                                  |                                                     |                                                                                                                                                                                                                                                                                                                                                                                                                                                                                                                                                                               |           |
| 1. Domestication/Cultivation                   |      |                                                                                                                                                                  |                                                     |                                                                                                                                                                                                                                                                                                                                                                                                                                                                                                                                                                               |           |
| 1                                              | 1.01 | Has the taxon been the subject of domestication (or cultivation) for at least 20 generations?                                                                    | Yes                                                 | Largemouth bass is native to North America. The species has been introduced widely as a game fish and is now cosmopolitan. It was introduced into Taiwan (China) in the mid 1970s, and following successful artificial propagation in 1983 was introduced into Guangdong in mainland China. This species is now distributed throughout the country and has become a major freshwater product in Chinese aquaculture.                                                                                                                                                          | Very high |
| 2                                              | 1.02 | Is the taxon harvested in the wild and likely to be sold or used in its live form?                                                                               | Yes                                                 | Largemouth bass fishing in Florida is an important source of revenue, contributing \$632 million per year to the economy of Florida (U.S. Department of Interior et al. 2006).                                                                                                                                                                                                                                                                                                                                                                                                | Very high |
| 3                                              | 1.03 | Does the taxon have invasive races, varieties, sub-taxa or congeners?                                                                                            | Yes                                                 | Its establishment, once introduced, was likely assisted by its aggressive feeding strategy, which has caused considerable declines in native prey fishes, where introduced (Scott and Crossman, 1973; Welcomme, 1988).                                                                                                                                                                                                                                                                                                                                                        | Very high |
| 2. Climate, distribution and introduction risk |      |                                                                                                                                                                  |                                                     |                                                                                                                                                                                                                                                                                                                                                                                                                                                                                                                                                                               |           |
| 4                                              | 2.01 | How similar are the climatic conditions of the Risk Assessment (RA) area and the taxon's native range?                                                           | Medium                                              | World Map of the Köppen-Geiger climate classification                                                                                                                                                                                                                                                                                                                                                                                                                                                                                                                         | Medium    |
| 5                                              | 2.02 | What is the quality of the climate matching data?                                                                                                                | Medium                                              | World Map of the Köppen-Geiger climate classification                                                                                                                                                                                                                                                                                                                                                                                                                                                                                                                         | Medium    |
| 6                                              | 2.03 | Is the taxon already present outside of captivity in the RA area?                                                                                                | No                                                  | This species is not currently found in the Caucasus region.                                                                                                                                                                                                                                                                                                                                                                                                                                                                                                                   | Very high |
| 7                                              | 2.04 | How many potential vectors could the taxon use to enter in the RA area?                                                                                          | One                                                 | This species may have entered in the region by human for aquacultural purposes.                                                                                                                                                                                                                                                                                                                                                                                                                                                                                               | Very high |
| 8                                              | 2.05 | Is the taxon currently found in close proximity to, and likely to enter into, the RA area in the near future (e.g. unintentional and intentional introductions)? | Yes                                                 | Micropterus salmoides have been recorded as introduced into Iran and Iraq including the Tigris-Euphrates.                                                                                                                                                                                                                                                                                                                                                                                                                                                                     | Very high |
| 3. Invasive elsewhere                          |      |                                                                                                                                                                  |                                                     |                                                                                                                                                                                                                                                                                                                                                                                                                                                                                                                                                                               |           |
| 9                                              | 3.01 | Has the taxon become naturalised (established viable populations) outside its native range?                                                                      | Yes                                                 | The largemouth bass has been introduced into many other regions and countries due to its popularity as a sport fish. It causes the decline, displacement or extinctions of species in its new habitat through predation and competition, for example in Namibia. They are also an invasive species in the Canadian province of New Brunswick, and are on the watch list across much of the far                                                                                                                                                                                | Very high |
| 10                                             | 3.02 | In the taxon's introduced range, are there known adverse impacts to wild stocks or commercial taxa?                                                              | Yes                                                 | M. salmoides has been introduced outside of its native range in North America to other areas of North America, South America, Europe, Asia and Pacific islands (i.e. Fiji, Hawaii). The species is exploited heavily for angling in its native range, and was spread primarily for recreational angling opportunities and secondarily for aquaculture. Its establishment, once introduced, was likely assisted by its aggressive feeding strategy, which has caused considerable declines in native prey fishes, where introduced (Scott and Crossman, 1973; Welcomme, 1988). | Very high |
| 11                                             | 3.03 | In the taxon's introduced range, are there known adverse impacts to aquaculture?                                                                                 | Yes                                                 | No such study has been conducted                                                                                                                                                                                                                                                                                                                                                                                                                                                                                                                                              | Low       |
| 12                                             | 3.04 | In the taxon's introduced range, are there known adverse impacts to ecosystem                                                                                    | Yes                                                 | No such study has been conducted                                                                                                                                                                                                                                                                                                                                                                                                                                                                                                                                              | Low       |
| 13                                             | 3.05 | In the taxon's introduced range, are there known adverse socio-economic impacts?                                                                                 | Yes                                                 | No such study has been conducted                                                                                                                                                                                                                                                                                                                                                                                                                                                                                                                                              | Low       |
| B. Biology/Ecology                             |      |                                                                                                                                                                  |                                                     |                                                                                                                                                                                                                                                                                                                                                                                                                                                                                                                                                                               |           |
| 4. Undesirable (or persistence) traits         |      |                                                                                                                                                                  |                                                     |                                                                                                                                                                                                                                                                                                                                                                                                                                                                                                                                                                               |           |
| 14                                             | 4.01 | Is it likely that the taxon will be poisonous or pose other risks to human health?                                                                               | No                                                  | This species does not pose a threat to humans.                                                                                                                                                                                                                                                                                                                                                                                                                                                                                                                                | Very high |
| 15                                             | 4.02 | Is it likely that the taxon will smother one or more native taxa (that are not threatened or protected)?                                                         | Yes                                                 | Introduced bass usually affect populations of small native fishes through predation, sometimes resulting in the decline or extinction of such species (Minckley 1973, in Fuller, 1999). Studies have shown that largemouth bass are capable of displacing native species, even predatory species such as northern                                                                                                                                                                                                                                                             | Very high |
| 16                                             | 4.03 | Are there any threatened or protected taxa that the non-native taxon would parasitise in the RA area?                                                            | Yes                                                 | There are several protected and threatened species in the SC region which would be affected by M. salmoides: e.g. Salmo spp, Acipenser spp, Luciobarbus capito, etc.                                                                                                                                                                                                                                                                                                                                                                                                          | Very high |

|                                 |      |                                                                                                                                                                         |                |                                                                                                                                                                                                                                                                                                                                                                                                                                                                                                                                                                            |           |
|---------------------------------|------|-------------------------------------------------------------------------------------------------------------------------------------------------------------------------|----------------|----------------------------------------------------------------------------------------------------------------------------------------------------------------------------------------------------------------------------------------------------------------------------------------------------------------------------------------------------------------------------------------------------------------------------------------------------------------------------------------------------------------------------------------------------------------------------|-----------|
| 17                              | 4.04 | Is the taxon adaptable in terms of climatic and other environmental conditions, thus enhancing its potential persistence if it has invaded or could invade the RA area? | Yes            | M. salmoides has been introduced outside of its native range in North America to other areas of North America, South America, Europe, Asia and Pacific islands (i.e. Fiji, Hawaii). Its establishment, once introduced, was likely assisted by its aggressive feeding strategy, which has caused considerable declines in native prey fishes, where introduced (Scott and Crossman, 1973; Welcomme, 1988). It seems that this species has adapted to new environmental conditions and it is expected that it will be successfully established in the Caucasus region if it | Very high |
| 18                              | 4.05 | Is the taxon likely to disrupt food-web structure/function in aquatic ecosystems if it has invaded or is likely to invade the RA                                        | Yes            | The probability of this is quite high if this species is distributed in the region.                                                                                                                                                                                                                                                                                                                                                                                                                                                                                        | Very high |
| 19                              | 4.06 | Is the taxon likely to exert adverse impacts on ecosystem services in the RA area?                                                                                      | Yes            | The probability of this is high if this species distributed in the region.                                                                                                                                                                                                                                                                                                                                                                                                                                                                                                 | High      |
| 20                              | 4.07 | Is it likely that the taxon will host, and/or act as a vector for, recognised pests and infectious agents that are endemic in the RA                                    | Not applicable | Data deficient                                                                                                                                                                                                                                                                                                                                                                                                                                                                                                                                                             | Low       |
| 21                              | 4.08 | Is it likely that the taxon will host, and/or act as a vector for, recognised pests and infectious agents that are absent from (novel to) the RA area?                  | Not applicable | Data deficient                                                                                                                                                                                                                                                                                                                                                                                                                                                                                                                                                             | Low       |
| 22                              | 4.09 | Is it likely that the taxon will achieve a body size that will make it more likely to be released from captivity?                                                       | Yes            | Max length is 97.0 cm TL male/unsexed; common length : 40.0 cm TL male/unsexed; max. published weight: 10.1 kg. This species is a active subject for aquaculture.                                                                                                                                                                                                                                                                                                                                                                                                          | Very high |
| 23                              | 4.10 | Is the taxon capable of sustaining itself in a range of water velocity conditions (e.g. versatile in habitat use)?                                                      | Yes            | Inhabit lakes, ponds, swamps, and backwaters and pools of creeks, and small to large rivers. Usually found over mud or sand and common in impoundments. They prefer quiet, clear water and                                                                                                                                                                                                                                                                                                                                                                                 | High      |
| 24                              | 4.11 | Is it likely that the taxon's mode of existence (e.g. excretion of by-products) or behaviours (e.g. feeding) will reduce habitat quality for native taxa?               | Yes            | No similar study has been conducted                                                                                                                                                                                                                                                                                                                                                                                                                                                                                                                                        | Low       |
| 25                              | 4.12 | Is the taxon likely to maintain a viable population even when present in low densities (or persisting in adverse conditions by way of a dormant form)?                  | Yes            | No similar study has been conducted                                                                                                                                                                                                                                                                                                                                                                                                                                                                                                                                        | Low       |
| <b>5. Resource exploitation</b> |      |                                                                                                                                                                         |                |                                                                                                                                                                                                                                                                                                                                                                                                                                                                                                                                                                            |           |
| 26                              | 5.01 | Is the taxon likely to consume threatened or protected native taxa in the RA area?                                                                                      | Yes            | M. salmoides is a predator fish and the probability of that is very high. Potential preys includes threatened and protected species e.g.: Acipenser spp, Salmo spp, etc.                                                                                                                                                                                                                                                                                                                                                                                                   | Very high |
| 27                              | 5.02 | Is the taxon likely to sequester food resources (including nutrients) to the detriment of native taxa in the RA area?                                                   | Yes            | M. salmoides is a predator fish and the probability of that is very high.                                                                                                                                                                                                                                                                                                                                                                                                                                                                                                  | Very high |
| <b>6. Reproduction</b>          |      |                                                                                                                                                                         |                |                                                                                                                                                                                                                                                                                                                                                                                                                                                                                                                                                                            |           |
| 28                              | 6.01 | Is the taxon likely to exhibit parental care and/or to reduce age-at-maturity in response to environmental conditions?                                                  | Yes            | Male largemouth bass care for their offspring from fertilization until the offspring disperse after becoming capable of avoiding predators.                                                                                                                                                                                                                                                                                                                                                                                                                                | Very high |
| 29                              | 6.02 | Is the taxon likely to produce viable gametes or propagules (in the RA area)?                                                                                           | No             | Currently this species does not occurring in the SC region.                                                                                                                                                                                                                                                                                                                                                                                                                                                                                                                | Very high |
| 30                              | 6.03 | Is the taxon likely to hybridise naturally with native taxa?                                                                                                            | Yes            | Such a fact is not known                                                                                                                                                                                                                                                                                                                                                                                                                                                                                                                                                   | Low       |
| 31                              | 6.04 | Is the taxon likely to be hermaphroditic or to display asexual reproduction?                                                                                            | Yes            | The study details the severity of intersex in a population of largemouth bass near a major metropolitan area, which represents an important contribution to the understanding of fish reproductive ecology in ecosystems with a history of environmental disturbance and recovery such as the Illinois River                                                                                                                                                                                                                                                               | Medium    |
| 32                              | 6.05 | Is the taxon dependent on the presence of another taxon (or specific habitat features) to complete its life cycle?                                                      | No             | No such fact has been described.                                                                                                                                                                                                                                                                                                                                                                                                                                                                                                                                           | High      |
| 33                              | 6.06 | Is the taxon known (or likely) to produce a large number of propagules or offspring within a short time span (e.g. < 1 year)?                                           | Yes            | One female can produce anywhere from 3,000-45,000 offspring at once but the average is 4,000.                                                                                                                                                                                                                                                                                                                                                                                                                                                                              | Medium    |
| 34                              | 6.07 | How many time units (days, months, years) does the taxon require to reach the age-at-first-reproduction?                                                                | 1              | Largemouth bass usually reach sexual maturity and begin spawning when they are about a year old.                                                                                                                                                                                                                                                                                                                                                                                                                                                                           | Very high |
| <b>7. Dispersal mechanisms</b>  |      |                                                                                                                                                                         |                |                                                                                                                                                                                                                                                                                                                                                                                                                                                                                                                                                                            |           |
| 35                              | 7.01 | How many potential internal vectors/pathways could the taxon use to disperse within the RA area (with suitable                                                          | One            | This species can be spread by artificial introduction by humans into the SC region.                                                                                                                                                                                                                                                                                                                                                                                                                                                                                        | Very high |
| 36                              | 7.02 | Will any of these vectors/pathways bring the taxon in close proximity to one or more protected areas (e.g. MCZ, MPA, SSSI)?                                             | Yes            | If the species spreads in the region, it is likely that it will penetrate protected areas as well.                                                                                                                                                                                                                                                                                                                                                                                                                                                                         | Very high |
| 37                              | 7.03 | Does the taxon have a means of actively attaching itself to hard substrata (e.g. ship hulls, pilings, buoys) such that it enhances the likelihood of dispersal?         | No             | This species does not has such means.                                                                                                                                                                                                                                                                                                                                                                                                                                                                                                                                      | Very high |
| 38                              | 7.04 | Is natural dispersal of the taxon likely to occur as eggs (for animals) or as propagules (for plants: seeds, spores) in the RA area?                                    | No             | Currently, this species is not common in the region.                                                                                                                                                                                                                                                                                                                                                                                                                                                                                                                       | Very high |
| 39                              | 7.05 | Is natural dispersal of the taxon likely to occur as larvae/juveniles (for animals) or as fragments/seedlings (for plants) in the RA area?                              | No             | Currently, this species is not common in the region.                                                                                                                                                                                                                                                                                                                                                                                                                                                                                                                       | Very high |
| 40                              | 7.06 | Are older life stages of the taxon likely to migrate in the RA area for reproduction?                                                                                   | No             | Currently, this species is not common in the region.                                                                                                                                                                                                                                                                                                                                                                                                                                                                                                                       | Very high |

|                                |      |                                                                                                                                                                              |                |                                                                                                                                                                                                                          |           |
|--------------------------------|------|------------------------------------------------------------------------------------------------------------------------------------------------------------------------------|----------------|--------------------------------------------------------------------------------------------------------------------------------------------------------------------------------------------------------------------------|-----------|
| 41                             | 7.07 | Are propagules or eggs of the taxon likely to be dispersed in the RA area by other animals?                                                                                  | No             | Currently, this species is not common in the region.                                                                                                                                                                     | Very high |
| 42                             | 7.08 | Is dispersal of the taxon along any of the vectors/pathways mentioned in the previous seven questions (35–41; i.e. both unintentional or intentional) likely to be           | Not applicable | Data deficient                                                                                                                                                                                                           | Low       |
| 43                             | 7.09 | Is dispersal of the taxon density dependent?                                                                                                                                 | Not applicable | Data deficient                                                                                                                                                                                                           | Low       |
| <b>8. Tolerance attributes</b> |      |                                                                                                                                                                              |                |                                                                                                                                                                                                                          |           |
| 44                             | 8.01 | Is the taxon able to withstand being out of water for extended periods (e.g. minimum of one or more hours) at some stage of its life cycle?                                  | No             | No such fact has been described.                                                                                                                                                                                         | High      |
| 45                             | 8.02 | Is the taxon tolerant of a wide range of water quality conditions relevant to that taxon? [In the Justification field, indicate the relevant water quality variable(s) being | Yes            | Largemouth bass are more tolerant of low dissolved oxygen and pH than are smallmouth bass (Scott and Crossman 1973; Lasenby and Kerr 2000).                                                                              | Medium    |
| 46                             | 8.03 | Can the taxon be controlled or eradicated in the wild with chemical, biological, or other agents/means?                                                                      | Yes            | Options for <i>M. dolomieu</i> control include biological control, chemical control, environmental manipulation, and physical removal (Loppnow et al. 2013).                                                             | Medium    |
| 47                             | 8.04 | Is the taxon likely to tolerate or benefit from environmental/human disturbance?                                                                                             | Yes            | This species has spread by humans in many regions of the world.                                                                                                                                                          | Very high |
| 48                             | 8.05 | Is the taxon able to tolerate salinity levels that are higher or lower than those found in its usual environment?                                                            | Yes            | Largemouth bass are generally found in low salinity environments < 5 ppt, but have also been shown to be tolerant of salinities up to 12 ppt (Peer et al., 2006).                                                        | High      |
| 49                             | 8.06 | Are there effective natural enemies (predators) of the taxon present in the RA area?                                                                                         | Yes            | There are several potential predators distributed in the SC region which can control the <i>M. salmoides</i> populations: <i>Esox lucius</i> , <i>Sander lucioperca</i> , <i>Silurus glanis</i> , <i>Salmo</i> spp, etc. | Very high |
| <b>C. Climate change</b>       |      |                                                                                                                                                                              |                |                                                                                                                                                                                                                          |           |
| <b>9. Climate change</b>       |      |                                                                                                                                                                              |                |                                                                                                                                                                                                                          |           |
| 50                             | 9.01 | Under the predicted future climatic conditions, are the risks of entry into the RA area posed by the taxon likely to increase, decrease or not change?                       | Increase       | Own judgement                                                                                                                                                                                                            | Medium    |
| 51                             | 9.02 | Under the predicted future climatic conditions, are the risks of establishment posed by the taxon likely to increase, decrease or not change?                                | Increase       | Own judgement                                                                                                                                                                                                            | Medium    |
| 52                             | 9.03 | Under the predicted future climatic conditions, are the risks of dispersal within the RA area posed by the taxon likely to increase, decrease or not change?                 | Increase       | Own judgement                                                                                                                                                                                                            | Medium    |
| 53                             | 9.04 | Under the predicted future climatic conditions, what is the likely magnitude of future potential impacts on biodiversity and/or ecological integrity/status?                 | Higher         | Own judgement                                                                                                                                                                                                            | Medium    |
| 54                             | 9.05 | Under the predicted future climatic conditions, what is the likely magnitude of future potential impacts on ecosystem structure and/or function?                             | Higher         | Own judgement                                                                                                                                                                                                            | Medium    |
| 55                             | 9.06 | Under the predicted future climatic conditions, what is the likely magnitude of future potential impacts on ecosystem services/socio-economic factors?                       | Higher         | Own judgement                                                                                                                                                                                                            | Medium    |

| Statistics                                     |             |
|------------------------------------------------|-------------|
| Scores                                         |             |
| <b>BRA</b>                                     | <b>38.5</b> |
| <b>BRA Outcome</b>                             | <b>-</b>    |
| <b>BRA+CCA</b>                                 | <b>50.5</b> |
| <b>BRA+CCA Outcome</b>                         | <b>-</b>    |
| Score partition                                |             |
| <b>A. Biogeography/Historical</b>              | <b>17.5</b> |
| 1. Domestication/Cultivation                   | 4.0         |
| 2. Climate, distribution and introduction risk | 0.0         |
| 3. Invasive elsewhere                          | 13.5        |
| <b>B. Biology/Ecology</b>                      | <b>21.0</b> |
| 4. Undesirable (or persistence) traits         | 9.0         |
| 5. Resource exploitation                       | 7.0         |
| 6. Reproduction                                | 6.0         |
| 7. Dispersal mechanisms                        | -4.0        |
| 8. Tolerance attributes                        | 3.0         |
| <b>C. Climate change</b>                       | <b>12.0</b> |
| 9. Climate change                              | 12.0        |
| Answered Questions                             |             |
| <b>Total</b>                                   | <b>55</b>   |
| <b>A. Biogeography/Historical</b>              | <b>13</b>   |
| 1. Domestication/Cultivation                   | 3           |
| 2. Climate, distribution and introduction risk | 5           |
| 3. Invasive elsewhere                          | 5           |
| <b>B. Biology/Ecology</b>                      | <b>36</b>   |
| 4. Undesirable (or persistence) traits         | 12          |
| 5. Resource exploitation                       | 2           |
| 6. Reproduction                                | 7           |
| 7. Dispersal mechanisms                        | 9           |
| 8. Tolerance attributes                        | 6           |

|                                              |           |
|----------------------------------------------|-----------|
| <b>C. Climate change</b>                     | <b>6</b>  |
| <i>9. Climate change</i>                     | 6         |
| <b>Sectors affected</b>                      |           |
| <b>Commercial</b>                            | <b>14</b> |
| <b>Environmental</b>                         | <b>16</b> |
| <b>Species or population nuisance traits</b> | <b>22</b> |

|                   |             |
|-------------------|-------------|
| <b>Thresholds</b> |             |
| <b>BRA</b>        | -           |
| <b>BRA+CCA</b>    | -           |
| <b>Confidence</b> |             |
| <b>BRA+CCA</b>    | <b>0.73</b> |
| <b>BRA</b>        | <b>0.76</b> |
| <b>CCA</b>        | <b>0.50</b> |

|                            |  |
|----------------------------|--|
| <b>Date and Time</b>       |  |
| <b>13/05/2022 13:01:39</b> |  |

AS-ISK v2

| Taxon and Assessor details         |                                                                                                                                     |
|------------------------------------|-------------------------------------------------------------------------------------------------------------------------------------|
| Category                           | Fishes and Lampreys (freshwater)                                                                                                    |
| Taxon name                         | <i>Micropterus salmoides</i>                                                                                                        |
| Common name                        | largemouth bass                                                                                                                     |
| Assessor                           | Tatia Kuljanishvili                                                                                                                 |
| Risk screening context             |                                                                                                                                     |
| Reason and socio-economic benefits | Introduced worldwide for angling and aquaculture                                                                                    |
| Risk assessment area               | South Caucasus                                                                                                                      |
| Taxonomy                           | Actinopteri (ray-finned fishes) > Centrarchiformes (Basses) > Centrarchidae                                                         |
| Native range                       | North America: St. Lawrence - Great Lakes, and Mississippi River basins from southern Quebec to                                     |
| Introduced range                   | has been introduced outside of its native range in North America to other areas of North America,                                   |
| URL                                | <a href="https://www.fishbase.se/summary/Micropterus-salmoides.html">https://www.fishbase.se/summary/Micropterus-salmoides.html</a> |

|                                                |      | Response                                                                                                                                                         | Justification (references and/or other information) | Confidence                                                                                                                                                |           |
|------------------------------------------------|------|------------------------------------------------------------------------------------------------------------------------------------------------------------------|-----------------------------------------------------|-----------------------------------------------------------------------------------------------------------------------------------------------------------|-----------|
| A. Biogeography/Historical                     |      |                                                                                                                                                                  |                                                     |                                                                                                                                                           |           |
| 1. Domestication/Cultivation                   |      |                                                                                                                                                                  |                                                     |                                                                                                                                                           |           |
| 1                                              | 1.01 | Has the taxon been the subject of domestication (or cultivation) for at least 20 generations?                                                                    | Yes                                                 | It can be farmed in aquaponic systems and fish farms                                                                                                      | High      |
| 2                                              | 1.02 | Is the taxon harvested in the wild and likely to be sold or used in its live form?                                                                               | Yes                                                 | Yes. Taxon is harvested in wild and is sold in its live form                                                                                              | Very high |
| 3                                              | 1.03 | Does the taxon have invasive races, varieties, sub-taxa or congeners?                                                                                            | Yes                                                 | for example <i>Micropterus dolomieu</i>                                                                                                                   | High      |
| 2. Climate, distribution and introduction risk |      |                                                                                                                                                                  |                                                     |                                                                                                                                                           |           |
| 4                                              | 2.01 | How similar are the climatic conditions of the Risk Assessment (RA) area and the taxon's native range?                                                           | High                                                | Very similar. out of 19 stations 15 are similar at the value of 9                                                                                         | High      |
| 5                                              | 2.02 | What is the quality of the climate matching data?                                                                                                                | Low                                                 | quality is low                                                                                                                                            | Medium    |
| 6                                              | 2.03 | Is the taxon already present outside of captivity in the RA area?                                                                                                | No                                                  | No evidence                                                                                                                                               | Very high |
| 7                                              | 2.04 | How many potential vectors could the taxon use to enter in the RA area?                                                                                          | > 1                                                 | Recreational fisheries, aquaculture                                                                                                                       | High      |
| 8                                              | 2.05 | Is the taxon currently found in close proximity to, and likely to enter into, the RA area in the near future (e.g. unintentional and intentional introductions)? | Yes                                                 | Iran                                                                                                                                                      | High      |
| 3. Invasive elsewhere                          |      |                                                                                                                                                                  |                                                     |                                                                                                                                                           |           |
| 9                                              | 3.01 | Has the taxon become naturalised (established viable populations) outside its                                                                                    | Yes                                                 | has become naturalised in several countries see the list: <a href="https://www.cabi.org/isc/datasheet/74846">https://www.cabi.org/isc/datasheet/74846</a> | Very high |
| 10                                             | 3.02 | In the taxon's introduced range, are there known adverse impacts to wild stocks or commercial taxa?                                                              | Yes                                                 | reduction of pray species                                                                                                                                 | High      |
| 11                                             | 3.03 | In the taxon's introduced range, are there known adverse impacts to aquaculture?                                                                                 | No                                                  | No adverse impacts to aquaculture are known.                                                                                                              | Low       |
| 12                                             | 3.04 | In the taxon's introduced range, are there known adverse impacts to ecosystem                                                                                    | No                                                  | transmission of diseases                                                                                                                                  | High      |
| 13                                             | 3.05 | In the taxon's introduced range, are there known adverse socio-economic impacts?                                                                                 | No                                                  | NOt assessed                                                                                                                                              | Low       |
| B. Biology/Ecology                             |      |                                                                                                                                                                  |                                                     |                                                                                                                                                           |           |
| 4. Undesirable (or persistence) traits         |      |                                                                                                                                                                  |                                                     |                                                                                                                                                           |           |
| 14                                             | 4.01 | Is it likely that the taxon will be poisonous or pose other risks to human health?                                                                               | No                                                  | Not poisonous                                                                                                                                             | Very high |
| 15                                             | 4.02 | Is it likely that the taxon will smother one or more native taxa (that are not threatened or protected)?                                                         | Yes                                                 | can cause the reduction of abundance of prey taxa and compete with natives for resources                                                                  | High      |
| 16                                             | 4.03 | Are there any threatened or protected taxa that the non-native taxon would parasitise in the RA area?                                                            | No                                                  | does not parasite                                                                                                                                         | Very high |

|                                 |      |                                                                                                                                                                         |     |                                                                                                                                                                                                                                                                                                                                                                                                                                                                                                                                                                                                                                                                                                                                                                                                                                                                                                                                                                                                                                                                                                                                                                                                                                                                                                                                                                                                                                                                                                                                                                                                                                                                                                                                                                                |           |
|---------------------------------|------|-------------------------------------------------------------------------------------------------------------------------------------------------------------------------|-----|--------------------------------------------------------------------------------------------------------------------------------------------------------------------------------------------------------------------------------------------------------------------------------------------------------------------------------------------------------------------------------------------------------------------------------------------------------------------------------------------------------------------------------------------------------------------------------------------------------------------------------------------------------------------------------------------------------------------------------------------------------------------------------------------------------------------------------------------------------------------------------------------------------------------------------------------------------------------------------------------------------------------------------------------------------------------------------------------------------------------------------------------------------------------------------------------------------------------------------------------------------------------------------------------------------------------------------------------------------------------------------------------------------------------------------------------------------------------------------------------------------------------------------------------------------------------------------------------------------------------------------------------------------------------------------------------------------------------------------------------------------------------------------|-----------|
| 17                              | 4.04 | Is the taxon adaptable in terms of climatic and other environmental conditions, thus enhancing its potential persistence if it has invaded or could invade the RA area? | Yes | M. salmoides prefers warm freshwater habitats within lakes, ponds, rivers and streams. Temperatures from 26.6-27.7°C were preferred during a field study in Ontario, Canada (Scott and Crossman, 1973). The species has wide habitat tolerances that allow it to colonize many temperate and sub-tropical freshwaters. However, the species may tolerate ice-cover for up to six months in its native range, suggesting that ice cover within the introduced range may not hinder dispersal success providing that suitably warm temperatures (>15.6°C) exist during spawning season. Within its native range the species frequents relatively shallow waters and is seldom captured from depths greater than 7 m (Scott and Crossman, 1973). Coincident with its introduction for sport and aquaculture, it may inhabit artificial waterbodies (e.g., irrigation ditches; canals) that possess suitably warm water for spawning (>15.6°C; Scott and Crossman, 1973). Survival within ice-covered lakes is possible assuming sufficient dissolved oxygen (> 1.5 mg/L). Relatively clear waters are preferred due to the species' method of visual predation, although the species is known from certain turbid systems where it presumably relies on scent and vibration to obtain prey items. Aquatic vegetation (both emergent and submergent) is usually necessary, as are mud, sand or gravel substrates that provide spawning habitat. The species preferentially occupies the nearshore (littoral) area of lakes due to the abundance of aquatic vegetation and warm temperatures. Feeding is reduced at water temperatures below 10°C, or may cease entirely during winter and spawning periods (Scott and Crossman, 1973). The species is not known to be particularly | High      |
| 18                              | 4.05 | Is the taxon likely to disrupt food-web structure/function in aquatic ecosystems if it has invaded or is likely to invade the RA                                        | Yes | it is likely                                                                                                                                                                                                                                                                                                                                                                                                                                                                                                                                                                                                                                                                                                                                                                                                                                                                                                                                                                                                                                                                                                                                                                                                                                                                                                                                                                                                                                                                                                                                                                                                                                                                                                                                                                   | Medium    |
| 19                              | 4.06 | Is the taxon likely to exert adverse impacts on ecosystem services in the RA area?                                                                                      | Yes | transmission of diseases                                                                                                                                                                                                                                                                                                                                                                                                                                                                                                                                                                                                                                                                                                                                                                                                                                                                                                                                                                                                                                                                                                                                                                                                                                                                                                                                                                                                                                                                                                                                                                                                                                                                                                                                                       | Low       |
| 20                              | 4.07 | Is it likely that the taxon will host, and/or act as a vector for, recognised pests and infectious agents that are endemic in the RA                                    | Yes | No info                                                                                                                                                                                                                                                                                                                                                                                                                                                                                                                                                                                                                                                                                                                                                                                                                                                                                                                                                                                                                                                                                                                                                                                                                                                                                                                                                                                                                                                                                                                                                                                                                                                                                                                                                                        | Low       |
| 21                              | 4.08 | Is it likely that the taxon will host, and/or act as a vector for, recognised pests and infectious agents that are absent from (novel to) the RA area?                  | Yes | It is possible                                                                                                                                                                                                                                                                                                                                                                                                                                                                                                                                                                                                                                                                                                                                                                                                                                                                                                                                                                                                                                                                                                                                                                                                                                                                                                                                                                                                                                                                                                                                                                                                                                                                                                                                                                 | High      |
| 22                              | 4.09 | Is it likely that the taxon will achieve a body size that will make it more likely to be released from captivity?                                                       | Yes | yes. See: <a href="https://www.fishbase.se/summary/Micropterus-salmoides.html">https://www.fishbase.se/summary/Micropterus-salmoides.html</a>                                                                                                                                                                                                                                                                                                                                                                                                                                                                                                                                                                                                                                                                                                                                                                                                                                                                                                                                                                                                                                                                                                                                                                                                                                                                                                                                                                                                                                                                                                                                                                                                                                  | High      |
| 23                              | 4.10 | Is the taxon capable of sustaining itself in a range of water velocity conditions (e.g. versatile in habitat use)?                                                      | No  | No information available                                                                                                                                                                                                                                                                                                                                                                                                                                                                                                                                                                                                                                                                                                                                                                                                                                                                                                                                                                                                                                                                                                                                                                                                                                                                                                                                                                                                                                                                                                                                                                                                                                                                                                                                                       | High      |
| 24                              | 4.11 | Is it likely that the taxon's mode of existence (e.g. excretion of by-products) or behaviours (e.g. feeding) will reduce habitat quality for native taxa?               | No  | No information available                                                                                                                                                                                                                                                                                                                                                                                                                                                                                                                                                                                                                                                                                                                                                                                                                                                                                                                                                                                                                                                                                                                                                                                                                                                                                                                                                                                                                                                                                                                                                                                                                                                                                                                                                       | High      |
| 25                              | 4.12 | Is the taxon likely to maintain a viable population even when present in low densities (or persisting in adverse conditions by way of a dormant form)?                  | Yes | yes. Most likely                                                                                                                                                                                                                                                                                                                                                                                                                                                                                                                                                                                                                                                                                                                                                                                                                                                                                                                                                                                                                                                                                                                                                                                                                                                                                                                                                                                                                                                                                                                                                                                                                                                                                                                                                               | High      |
| <b>5. Resource exploitation</b> |      |                                                                                                                                                                         |     |                                                                                                                                                                                                                                                                                                                                                                                                                                                                                                                                                                                                                                                                                                                                                                                                                                                                                                                                                                                                                                                                                                                                                                                                                                                                                                                                                                                                                                                                                                                                                                                                                                                                                                                                                                                |           |
| 26                              | 5.01 | Is the taxon likely to consume threatened or protected native taxa in the RA area?                                                                                      | Yes | it is possible                                                                                                                                                                                                                                                                                                                                                                                                                                                                                                                                                                                                                                                                                                                                                                                                                                                                                                                                                                                                                                                                                                                                                                                                                                                                                                                                                                                                                                                                                                                                                                                                                                                                                                                                                                 | Medium    |
| 27                              | 5.02 | Is the taxon likely to sequester food resources (including nutrients) to the detriment of native taxa in the RA area?                                                   | No  | No information available                                                                                                                                                                                                                                                                                                                                                                                                                                                                                                                                                                                                                                                                                                                                                                                                                                                                                                                                                                                                                                                                                                                                                                                                                                                                                                                                                                                                                                                                                                                                                                                                                                                                                                                                                       | Medium    |
| <b>6. Reproduction</b>          |      |                                                                                                                                                                         |     |                                                                                                                                                                                                                                                                                                                                                                                                                                                                                                                                                                                                                                                                                                                                                                                                                                                                                                                                                                                                                                                                                                                                                                                                                                                                                                                                                                                                                                                                                                                                                                                                                                                                                                                                                                                |           |
| 28                              | 6.01 | Is the taxon likely to exhibit parental care and/or to reduce age-at-maturity in response to environmental conditions?                                                  | Yes | parental care                                                                                                                                                                                                                                                                                                                                                                                                                                                                                                                                                                                                                                                                                                                                                                                                                                                                                                                                                                                                                                                                                                                                                                                                                                                                                                                                                                                                                                                                                                                                                                                                                                                                                                                                                                  | Very high |
| 29                              | 6.02 | Is the taxon likely to produce viable gametes or propagules (in the RA area)?                                                                                           | Yes | It is likely                                                                                                                                                                                                                                                                                                                                                                                                                                                                                                                                                                                                                                                                                                                                                                                                                                                                                                                                                                                                                                                                                                                                                                                                                                                                                                                                                                                                                                                                                                                                                                                                                                                                                                                                                                   | High      |
| 30                              | 6.03 | Is the taxon likely to hybridise naturally with native taxa?                                                                                                            | No  | No information available                                                                                                                                                                                                                                                                                                                                                                                                                                                                                                                                                                                                                                                                                                                                                                                                                                                                                                                                                                                                                                                                                                                                                                                                                                                                                                                                                                                                                                                                                                                                                                                                                                                                                                                                                       | Very high |
| 31                              | 6.04 | Is the taxon likely to be hermaphroditic or to display asexual reproduction?                                                                                            | No  | No. Does not display asexual reproduction                                                                                                                                                                                                                                                                                                                                                                                                                                                                                                                                                                                                                                                                                                                                                                                                                                                                                                                                                                                                                                                                                                                                                                                                                                                                                                                                                                                                                                                                                                                                                                                                                                                                                                                                      | Very high |
| 32                              | 6.05 | Is the taxon dependent on the presence of another taxon (or specific habitat features) to complete its life cycle?                                                      | No  | No. See: <a href="https://www.fishbase.se/summary/Micropterus-salmoides.html">https://www.fishbase.se/summary/Micropterus-salmoides.html</a>                                                                                                                                                                                                                                                                                                                                                                                                                                                                                                                                                                                                                                                                                                                                                                                                                                                                                                                                                                                                                                                                                                                                                                                                                                                                                                                                                                                                                                                                                                                                                                                                                                   | Very high |
| 33                              | 6.06 | Is the taxon known (or likely) to produce a large number of propagules or offspring within a short time span (e.g. < 1 year)?                                           | Yes | A nest may produce between 751-11,457 fry, averaging 5000-7000 individuals<br><a href="https://www.cabi.org/isc/datasheet/74846#tohabitat">https://www.cabi.org/isc/datasheet/74846#tohabitat</a>                                                                                                                                                                                                                                                                                                                                                                                                                                                                                                                                                                                                                                                                                                                                                                                                                                                                                                                                                                                                                                                                                                                                                                                                                                                                                                                                                                                                                                                                                                                                                                              | High      |
| 34                              | 6.07 | How many time units (days, months, years) does the taxon require to reach the age-at-first-reproduction?                                                                | 1   | 1 year                                                                                                                                                                                                                                                                                                                                                                                                                                                                                                                                                                                                                                                                                                                                                                                                                                                                                                                                                                                                                                                                                                                                                                                                                                                                                                                                                                                                                                                                                                                                                                                                                                                                                                                                                                         | Very high |
| <b>7. Dispersal mechanisms</b>  |      |                                                                                                                                                                         |     |                                                                                                                                                                                                                                                                                                                                                                                                                                                                                                                                                                                                                                                                                                                                                                                                                                                                                                                                                                                                                                                                                                                                                                                                                                                                                                                                                                                                                                                                                                                                                                                                                                                                                                                                                                                |           |
| 35                              | 7.01 | How many potential internal vectors/pathways could the taxon use to disperse within the RA area (with suitable                                                          | >1  | Recreational fisheries, Aquaculture                                                                                                                                                                                                                                                                                                                                                                                                                                                                                                                                                                                                                                                                                                                                                                                                                                                                                                                                                                                                                                                                                                                                                                                                                                                                                                                                                                                                                                                                                                                                                                                                                                                                                                                                            | Very high |
| 36                              | 7.02 | Will any of these vectors/pathways bring the taxon in close proximity to one or more protected areas (e.g. MCZ, MPA, SSSI)?                                             | Yes | it is possible                                                                                                                                                                                                                                                                                                                                                                                                                                                                                                                                                                                                                                                                                                                                                                                                                                                                                                                                                                                                                                                                                                                                                                                                                                                                                                                                                                                                                                                                                                                                                                                                                                                                                                                                                                 | High      |

|                                |      |                                                                                                                                                                              |                |                                                                                                               |           |
|--------------------------------|------|------------------------------------------------------------------------------------------------------------------------------------------------------------------------------|----------------|---------------------------------------------------------------------------------------------------------------|-----------|
| 37                             | 7.03 | Does the taxon have a means of actively attaching itself to hard substrata (e.g. ship hulls, pilings, buoys) such that it enhances the likelihood of dispersal?              | No             | No. Morphologically this species does not have a means of actively attaching itself to hard substrata         | Very high |
| 38                             | 7.04 | Is natural dispersal of the taxon likely to occur as eggs (for animals) or as propagules (for plants: seeds, spores) in the RA area?                                         | No             | No. can not be distributed as eggs.                                                                           | High      |
| 39                             | 7.05 | Is natural dispersal of the taxon likely to occur as larvae/juveniles (for animals) or as fragments/seedlings (for plants) in the RA area?                                   | Yes            | yes. it could be possible                                                                                     | Very high |
| 40                             | 7.06 | Are older life stages of the taxon likely to migrate in the RA area for reproduction?                                                                                        | No             | does not migrate                                                                                              | High      |
| 41                             | 7.07 | Are propagules or eggs of the taxon likely to be dispersed in the RA area by other animals?                                                                                  | No             | no. Can not be dispersed by other animals                                                                     | Very high |
| 42                             | 7.08 | Is dispersal of the taxon along any of the vectors/pathways mentioned in the previous seven questions (35–41; i.e. both unintentional or intentional) likely to be           | Not applicable | it is not yet introduced                                                                                      | Medium    |
| 43                             | 7.09 | Is dispersal of the taxon density dependent?                                                                                                                                 | No             | No information available                                                                                      | Low       |
| <b>8. Tolerance attributes</b> |      |                                                                                                                                                                              |                |                                                                                                               |           |
| 44                             | 8.01 | Is the taxon able to withstand being out of water for extended periods (e.g. minimum of one or more hours) at some stage of its life cycle?                                  | No             | no                                                                                                            | Very high |
| 45                             | 8.02 | Is the taxon tolerant of a wide range of water quality conditions relevant to that taxon? [In the Justification field, indicate the relevant water quality variable(s) being | No             | Can not tolerate low oxygen environment and is very sensitive to temperature and to human-produced chemicals. | Medium    |
| 46                             | 8.03 | Can the taxon be controlled or eradicated in the wild with chemical, biological, or other agents/means?                                                                      | Yes            | yes but it is costly and sometimes ineffective                                                                | Low       |
| 47                             | 8.04 | Is the taxon likely to tolerate or benefit from environmental/human disturbance?                                                                                             | No             | no information available                                                                                      | Medium    |
| 48                             | 8.05 | Is the taxon able to tolerate salinity levels that are higher or lower than those found in its usual environment?                                                            | No             | No documentation                                                                                              | Very high |
| 49                             | 8.06 | Are there effective natural enemies (predators) of the taxon present in the RA                                                                                               | No             | no. No effective natural enemies present in RA area                                                           | Very high |
| <b>C. Climate change</b>       |      |                                                                                                                                                                              |                |                                                                                                               |           |
| <b>9. Climate change</b>       |      |                                                                                                                                                                              |                |                                                                                                               |           |
| 50                             | 9.01 | Under the predicted future climatic conditions, are the risks of entry into the RA area posed by the taxon likely to increase, decrease or not change?                       | Increase       | increases                                                                                                     | Very high |
| 51                             | 9.02 | Under the predicted future climatic conditions, are the risks of establishment posed by the taxon likely to increase, decrease or not change?                                | Increase       | increases                                                                                                     | High      |
| 52                             | 9.03 | Under the predicted future climatic conditions, are the risks of dispersal within the RA area posed by the taxon likely to increase, decrease or not change?                 | Increase       | increases                                                                                                     | Very high |
| 53                             | 9.04 | Under the predicted future climatic conditions, what is the likely magnitude of future potential impacts on biodiversity and/or ecological integrity/status?                 | Higher         | higher                                                                                                        | Very high |
| 54                             | 9.05 | Under the predicted future climatic conditions, what is the likely magnitude of future potential impacts on ecosystem structure and/or function?                             | Higher         | higher                                                                                                        | Very high |
| 55                             | 9.06 | Under the predicted future climatic conditions, what is the likely magnitude of future potential impacts on ecosystem services/socio-economic factors?                       | Higher         | higher                                                                                                        | High      |

| Statistics                                     |             |
|------------------------------------------------|-------------|
| Scores                                         |             |
| <b>BRA</b>                                     | <b>22.0</b> |
| <b>BRA Outcome</b>                             | <b>-</b>    |
| <b>BRA+CCA</b>                                 | <b>34.0</b> |
| <b>BRA+CCA Outcome</b>                         | <b>-</b>    |
| Score partition                                |             |
| <b>A. Biogeography/Historical</b>              | <b>11.0</b> |
| 1. Domestication/Cultivation                   | 4.0         |
| 2. Climate, distribution and introduction risk | 1.0         |
| 3. Invasive elsewhere                          | 6.0         |
| <b>B. Biology/Ecology</b>                      | <b>11.0</b> |
| 4. Undesirable (or persistence) traits         | 8.0         |
| 5. Resource exploitation                       | 5.0         |
| 6. Reproduction                                | 3.0         |
| 7. Dispersal mechanisms                        | -1.0        |
| 8. Tolerance attributes                        | -4.0        |
| <b>C. Climate change</b>                       | <b>12.0</b> |
| 9. Climate change                              | 12.0        |

| Answered Questions                             |           |
|------------------------------------------------|-----------|
| <b>Total</b>                                   | <b>55</b> |
| <b>A. Biogeography/Historical</b>              | <b>13</b> |
| 1. Domestication/Cultivation                   | 3         |
| 2. Climate, distribution and introduction risk | 5         |
| 3. Invasive elsewhere                          | 5         |
| <b>B. Biology/Ecology</b>                      | <b>36</b> |
| 4. Undesirable (or persistence) traits         | 12        |
| 5. Resource exploitation                       | 2         |
| 6. Reproduction                                | 7         |
| 7. Dispersal mechanisms                        | 9         |
| 8. Tolerance attributes                        | 6         |
| <b>C. Climate change</b>                       | <b>6</b>  |
| 9. Climate change                              | 6         |
| Sectors affected                               |           |
| <b>Commercial</b>                              | <b>11</b> |
| <b>Environmental</b>                           | <b>12</b> |
| <b>Species or population nuisance traits</b>   | <b>14</b> |

| Thresholds     |             |
|----------------|-------------|
| <b>BRA</b>     | <b>-</b>    |
| <b>BRA+CCA</b> | <b>-</b>    |
| Confidence     |             |
| <b>BRA+CCA</b> | <b>0.76</b> |
| <b>BRA</b>     | <b>0.74</b> |
| <b>CCA</b>     | <b>0.92</b> |

| Date and Time       |  |
|---------------------|--|
| 21/05/2022 14:52:44 |  |



AS-ISK v2

| Taxon and Assessor details         |                                                                                                                       |
|------------------------------------|-----------------------------------------------------------------------------------------------------------------------|
| Category                           | Fishes and Lampreys (freshwater)                                                                                      |
| Taxon name                         | <i>Mugil cephalus</i>                                                                                                 |
| Common name                        | flathead grey mullet                                                                                                  |
| Assessor                           | Bella Japoshvili                                                                                                      |
| Risk screening context             |                                                                                                                       |
| Reason and socio-economic benefits | The species have been translocated to the Caspian Sea and have important economic value for the                       |
| Risk assessment area               | South Caucasus                                                                                                        |
| Taxonomy                           | Actinopteri (ray-finned fishes) > Mugiliformes (Mulletts) > Mugilidae (Mulletts)                                      |
| Native range                       | Cosmopolitan                                                                                                          |
| Introduced range                   | Caspian Sea                                                                                                           |
| URL                                | <a href="https://www.fishbase.de/summary/Mugil-cephalus.html">https://www.fishbase.de/summary/Mugil-cephalus.html</a> |

|                                                |      |                                                                                                                                                                         | Response | Justification (references and/or other information)                                                                                                                                                                                                                                                                                                                                                                                                        | Confidence |
|------------------------------------------------|------|-------------------------------------------------------------------------------------------------------------------------------------------------------------------------|----------|------------------------------------------------------------------------------------------------------------------------------------------------------------------------------------------------------------------------------------------------------------------------------------------------------------------------------------------------------------------------------------------------------------------------------------------------------------|------------|
| A. Biogeography/Historical                     |      |                                                                                                                                                                         |          |                                                                                                                                                                                                                                                                                                                                                                                                                                                            |            |
| 1. Domestication/Cultivation                   |      |                                                                                                                                                                         |          |                                                                                                                                                                                                                                                                                                                                                                                                                                                            |            |
| 1                                              | 1.01 | Has the taxon been the subject of domestication (or cultivation) for at least 20 generations?                                                                           | No       | Not spawning in captivity (within RA area). Yelghi, S., Shirangi, S. A., Ghorbani, R., & Khoshbavar Rostami, H. A. (2012). Annual cycle of ovarian development and sex hormones of grey mullet ( <i>Mugil cephalus</i> ) in captivity. Iranian Journal of Fisheries Sciences, 11(3), 693-703.                                                                                                                                                              | High       |
| 2                                              | 1.02 | Is the taxon harvested in the wild and likely to be sold or used in its live form?                                                                                      | Yes      | Yelghi, S., Shirangi, S. A., Ghorbani, R., & Khoshbavar Rostami, H. A. (2012). Annual cycle of ovarian development and sex hormones of grey mullet ( <i>Mugil cephalus</i> ) in captivity. Iranian Journal of Fisheries Sciences, 11(3), 693-703.                                                                                                                                                                                                          | Very high  |
| 3                                              | 1.03 | Does the taxon have invasive races, varieties, sub-taxa or congeners?                                                                                                   | No       | No other species within this genus or different races as invasive are known                                                                                                                                                                                                                                                                                                                                                                                | Medium     |
| 2. Climate, distribution and introduction risk |      |                                                                                                                                                                         |          |                                                                                                                                                                                                                                                                                                                                                                                                                                                            |            |
| 4                                              | 2.01 | How similar are the climatic conditions of the Risk Assessment (RA) area and the taxon's native range?                                                                  | High     | Result of climatch algorithm                                                                                                                                                                                                                                                                                                                                                                                                                               | Medium     |
| 5                                              | 2.02 | What is the quality of the climate matching data?                                                                                                                       | Low      | Due to low accuracy of local climate data                                                                                                                                                                                                                                                                                                                                                                                                                  | High       |
| 6                                              | 2.03 | Is the taxon already present outside of captivity in the RA area?                                                                                                       | No       | Bogutskaya N, Kijashko P, Naseka AM, Orlova MI. 2013. Identification keys for fish and invertebrates of the Caspian Sea. Vol. 1. Fish and molluscs, Tovarishestvo Nauchnikh Izdaniy KMK. (In Russian) Moscow, p. 443.                                                                                                                                                                                                                                      | Low        |
| 7                                              | 2.04 | How many potential vectors could the taxon use to enter in the RA area?                                                                                                 | One      | Human mediated translocation                                                                                                                                                                                                                                                                                                                                                                                                                               | High       |
| 8                                              | 2.05 | Is the taxon currently found in close proximity to, and likely to enter into, the RA area in the near future (e.g. unintentional and intentional introductions)?        | Yes      | Species is historically known from Black Sea coastline while it have been trayed to introduced in Caspian Sea                                                                                                                                                                                                                                                                                                                                              | High       |
| 3. Invasive elsewhere                          |      |                                                                                                                                                                         |          |                                                                                                                                                                                                                                                                                                                                                                                                                                                            |            |
| 9                                              | 3.01 | Has the taxon become naturalised (established viable populations) outside its native range?                                                                             | Yes      | VAZIRZADEH, A., & EZHDEHAKOSHPOUR, A. (2015). The effects of different hormonal treatments on the oocyte maturation in wild grey mullet ( <i>Mugil cephalus</i> ) collected from the Iranian coastal waters of the Oman Sea. Iranian journal of Ichthyology, 1(1), 17-                                                                                                                                                                                     | Low        |
| 10                                             | 3.02 | In the taxon's introduced range, are there known adverse impacts to wild stocks or commercial taxa?                                                                     | No       | Not a documented evidence is available                                                                                                                                                                                                                                                                                                                                                                                                                     | Low        |
| 11                                             | 3.03 | In the taxon's introduced range, are there known adverse impacts to aquaculture?                                                                                        | No       | Not evaluated, and in general is generally poorly understood                                                                                                                                                                                                                                                                                                                                                                                               | Low        |
| 12                                             | 3.04 | In the taxon's introduced range, are there known adverse impacts to ecosystem                                                                                           | No       | Not known, understudied                                                                                                                                                                                                                                                                                                                                                                                                                                    | Low        |
| 13                                             | 3.05 | In the taxon's introduced range, are there known adverse socio-economic impacts?                                                                                        | No       | Not known however less possible                                                                                                                                                                                                                                                                                                                                                                                                                            | Low        |
| B. Biology/Ecology                             |      |                                                                                                                                                                         |          |                                                                                                                                                                                                                                                                                                                                                                                                                                                            |            |
| 4. Undesirable (or persistence) traits         |      |                                                                                                                                                                         |          |                                                                                                                                                                                                                                                                                                                                                                                                                                                            |            |
| 14                                             | 4.01 | Is it likely that the taxon will be poisonous or pose other risks to human health?                                                                                      | No       | The species is harmless                                                                                                                                                                                                                                                                                                                                                                                                                                    | Very high  |
| 15                                             | 4.02 | Is it likely that the taxon will smother one or more native taxa (that are not threatened or protected)?                                                                | No       | Not such a species are within RA area                                                                                                                                                                                                                                                                                                                                                                                                                      | Low        |
| 16                                             | 4.03 | Are there any threatened or protected taxa that the non-native taxon would parasitise in the RA area?                                                                   | No       | The species is not parasite nor predator (not ocnsider the plancton feedenig behavior)                                                                                                                                                                                                                                                                                                                                                                     | Low        |
| 17                                             | 4.04 | Is the taxon adaptable in terms of climatic and other environmental conditions, thus enhancing its potential persistence if it has invaded or could invade the RA area? | Yes      | M cephalus is known to adopt a wide variety of environmental conditions. Albaret, J - J., 2003. Mugilidae. p. 601-611 In C. Lévêque, D. Paugy and G.G. Teugels (eds.) Faune des poissons d'eaux douce et saumâtres de l'Afrique de l'Ouest, Tome 2. Coll. Faune et Flore tropicales 40. Musée Royal de l'Afrique Centrale, Tervuren, Belgique, Museum National d'Histoire Naturelle, Paris, France and Institut de Recherche pour le Développement. Paris. | Very high  |
| 18                                             | 4.05 | Is the taxon likely to disrupt food-web structure/function in aquatic ecosystems if it has invaded or is likely to invade the RA                                        | No       | No documented evidence exist                                                                                                                                                                                                                                                                                                                                                                                                                               | Low        |
| 19                                             | 4.06 | Is the taxon likely to exert adverse impacts on ecosystem services in the RA area?                                                                                      | No       | Not expected. Generally this species have important economic value and introduced area it is also thought to bring additional economic benefit within RA area                                                                                                                                                                                                                                                                                              | Low        |
| 20                                             | 4.07 | Is it likely that the taxon will host, and/or act as a vector for, recognised pests and infectious agents that are endemic in the RA                                    | No       | No documented evidence for that and not expected                                                                                                                                                                                                                                                                                                                                                                                                           | Low        |

|                                 |      |                                                                                                                                                                              |     |                                                                                                                                                                                                                                         |           |
|---------------------------------|------|------------------------------------------------------------------------------------------------------------------------------------------------------------------------------|-----|-----------------------------------------------------------------------------------------------------------------------------------------------------------------------------------------------------------------------------------------|-----------|
| 21                              | 4.08 | Is it likely that the taxon will host, and/or act as a vector for, recognised pests and infectious agents that are absent from (novel to) the RA area?                       | Yes | Although no documented evidence exists, it can bring such a new pest/parasite in new areas                                                                                                                                              | Low       |
| 22                              | 4.09 | Is it likely that the taxon will achieve a body size that will make it more likely to be released from captivity?                                                            | Yes | No documented evidence exist though species can grow as large as 100 cm that might trigger to make them release aquacultural captivity                                                                                                  | Low       |
| 23                              | 4.10 | Is the taxon capable of sustaining itself in a range of water velocity conditions (e.g. versatile in habitat use)?                                                           | Yes | <a href="https://www.fishbase.de/summary/Mugil-cephalus.html">https://www.fishbase.de/summary/Mugil-cephalus.html</a>                                                                                                                   | Medium    |
| 24                              | 4.11 | Is it likely that the taxon's mode of existence (e.g. excretion of by-products) or behaviours (e.g. feeding) will reduce habitat quality for native taxa?                    | No  | No documented evidence exists                                                                                                                                                                                                           | Low       |
| 25                              | 4.12 | Is the taxon likely to maintain a viable population even when present in low densities (or persisting in adverse conditions by way of a dormant form)?                       | No  | Although no documented evidence exist we suppose that species is not able to maintain population in low density                                                                                                                         | Low       |
| <b>5. Resource exploitation</b> |      |                                                                                                                                                                              |     |                                                                                                                                                                                                                                         |           |
| 26                              | 5.01 | Is the taxon likely to consume threatened or protected native taxa in the RA area?                                                                                           | No  | Based on professional judgment                                                                                                                                                                                                          | Low       |
| 27                              | 5.02 | Is the taxon likely to sequester food resources (including nutrients) to the detriment of native taxa in the RA area?                                                        | Yes | In spite the fact that species is mostly feeding in marine environment, the species can compete to other species while populations are usually large                                                                                    | Low       |
| <b>6. Reproduction</b>          |      |                                                                                                                                                                              |     |                                                                                                                                                                                                                                         |           |
| 28                              | 6.01 | Is the taxon likely to exhibit parental care and/or to reduce age-at-maturity in response to environmental conditions?                                                       | No  | No such behaviour is characteristic for that species                                                                                                                                                                                    | Medium    |
| 29                              | 6.02 | Is the taxon likely to produce viable gametes or propagules (in the RA area)?                                                                                                | No  | Yousefian, M., Ghanei, M., Pourgolam, R. and Rostami, H. H. 2009. Gonad Development and Hormonal Induction in Artificial Propagation of Grey Mullet, Mugil Cephalus L., Research Journal of Fisheries and Hydrobiology, 4(2), 35-40.    | High      |
| 30                              | 6.03 | Is the taxon likely to hybridise naturally with native taxa?                                                                                                                 | No  | Not such an evidence exists                                                                                                                                                                                                             | Medium    |
| 31                              | 6.04 | Is the taxon likely to be hermaphroditic or to display asexual reproduction?                                                                                                 | No  | the species is reproducing sexually                                                                                                                                                                                                     | Medium    |
| 32                              | 6.05 | Is the taxon dependent on the presence of another taxon (or specific habitat features) to complete its life cycle?                                                           | No  | Species is independent from any other species during its lifecycle                                                                                                                                                                      | High      |
| 33                              | 6.06 | Is the taxon known (or likely) to produce a large number of propagules or offspring within a short time span (e.g. < 1 year)?                                                | Yes | <a href="https://www.fishbase.de/summary/Mugil-cephalus.html">https://www.fishbase.de/summary/Mugil-cephalus.html</a>                                                                                                                   | Very high |
| 34                              | 6.07 | How many time units (days, months, years) does the taxon require to reach the age-at-first-reproduction?                                                                     | 3   | Years                                                                                                                                                                                                                                   | High      |
| <b>7. Dispersal mechanisms</b>  |      |                                                                                                                                                                              |     |                                                                                                                                                                                                                                         |           |
| 35                              | 7.01 | How many potential internal vectors/pathways could the taxon use to disperse within the RA area (with suitable)                                                              | One | Human mediated translocation                                                                                                                                                                                                            | High      |
| 36                              | 7.02 | Will any of these vectors/pathways bring the taxon in close proximity to one or more protected areas (e.g. MCZ, MPA, SSSI)?                                                  | No  | There is not such a protected areas in the RA area                                                                                                                                                                                      | High      |
| 37                              | 7.03 | Does the taxon have a means of actively attaching itself to hard substrata (e.g. ship hulls, pilings, buoys) such that it enhances the likelihood of dispersal?              | No  | Species is not capable for such a behavior                                                                                                                                                                                              | Very high |
| 38                              | 7.04 | Is natural dispersal of the taxon likely to occur as eggs (for animals) or as propagules (for plants: seeds, spores) in the RA area?                                         | No  | Naturally it is nearly impossible to attain the RA area                                                                                                                                                                                 | High      |
| 39                              | 7.05 | Is natural dispersal of the taxon likely to occur as larvae/juveniles (for animals) or as fragments/seedlings (for plants) in the RA area?                                   | Yes | Yelghi, S., Shirangi, S. A., Ghorbani, R., & Khosbavar Rostami, H. A. (2012). Annual cycle of ovarian development and sex hormones of grey mullet (Mugil cephalus) in captivity. Iranian Journal of Fisheries Sciences, 11(3), 693-703. | Very high |
| 40                              | 7.06 | Are older life stages of the taxon likely to migrate in the RA area for reproduction?                                                                                        | No  | Not expected, no documented evidence exists                                                                                                                                                                                             | High      |
| 41                              | 7.07 | Are propagules or eggs of the taxon likely to be dispersed in the RA area by other animals?                                                                                  | No  | No such fact has ever been recorded                                                                                                                                                                                                     | Very high |
| 42                              | 7.08 | Is dispersal of the taxon along any of the vectors/pathways mentioned in the previous seven questions (35-41; i.e. both unintentional or intentional) likely to be           | Yes | Translocation is usually happens with large amount of propagules                                                                                                                                                                        | High      |
| 43                              | 7.09 | Is dispersal of the taxon density dependent?                                                                                                                                 | No  | No documented evidence exists                                                                                                                                                                                                           | Low       |
| <b>8. Tolerance attributes</b>  |      |                                                                                                                                                                              |     |                                                                                                                                                                                                                                         |           |
| 44                              | 8.01 | Is the taxon able to withstand being out of water for extended periods (e.g. minimum of one or more hours) at some stage of its life cycle?                                  | No  | Not expected and no documented evidence exists                                                                                                                                                                                          | High      |
| 45                              | 8.02 | Is the taxon tolerant of a wide range of water quality conditions relevant to that taxon? [In the Justification field, indicate the relevant water quality variable(s) being | Yes | Oxygen concentration, Salinity, temperature, turbidity                                                                                                                                                                                  | Very high |
| 46                              | 8.03 | Can the taxon be controlled or eradicated in the wild with chemical, biological, or other agents/means?                                                                      | No  | No documented evidence exists                                                                                                                                                                                                           | Low       |

|                          |      |                                                                                                                                                              |           |                                                                             |        |
|--------------------------|------|--------------------------------------------------------------------------------------------------------------------------------------------------------------|-----------|-----------------------------------------------------------------------------|--------|
| 47                       | 8.04 | Is the taxon likely to tolerate or benefit from environmental/human disturbance?                                                                             | No        | Not expected                                                                | Low    |
| 48                       | 8.05 | Is the taxon able to tolerate salinity levels that are higher or lower than those found in its usual environment?                                            | No        | Not expected based on professional judgment                                 | Medium |
| 49                       | 8.06 | Are there effective natural enemies (predators) of the taxon present in the RA                                                                               | No        | Not an effective natural enemies are there based on professional experience | Low    |
| <b>C. Climate change</b> |      |                                                                                                                                                              |           |                                                                             |        |
| <b>9. Climate change</b> |      |                                                                                                                                                              |           |                                                                             |        |
| 50                       | 9.01 | Under the predicted future climatic conditions, are the risks of entry into the RA area posed by the taxon likely to increase, decrease or not change?       | No change | Based on professional judgement                                             | Low    |
| 51                       | 9.02 | Under the predicted future climatic conditions, are the risks of establishment posed by the taxon likely to increase, decrease or not change?                | No change | Based on professional judgement                                             | Low    |
| 52                       | 9.03 | Under the predicted future climatic conditions, are the risks of dispersal within the RA area posed by the taxon likely to increase, decrease or not change? | Increase  | Based on professional judgement                                             | Low    |
| 53                       | 9.04 | Under the predicted future climatic conditions, what is the likely magnitude of future potential impacts on biodiversity and/or ecological integrity/status? | Higher    | Based on professional judgement                                             | Low    |
| 54                       | 9.05 | Under the predicted future climatic conditions, what is the likely magnitude of future potential impacts on ecosystem structure and/or function?             | Higher    | Based on professional judgement                                             | Low    |
| 55                       | 9.06 | Under the predicted future climatic conditions, what is the likely magnitude of future potential impacts on ecosystem services/socio-economic factors?       | Higher    | Based on professional judgement                                             | Low    |

| Statistics                                     |      |
|------------------------------------------------|------|
| Scores                                         |      |
| BRA                                            | 6.0  |
| BRA Outcome                                    | -    |
| BRA+CCA                                        | 14.0 |
| BRA+CCA Outcome                                | -    |
| Score partition                                |      |
| A. Biogeography/Historical                     | 2.0  |
| 1. Domestication/Cultivation                   | 0.0  |
| 2. Climate, distribution and introduction risk | 0.0  |
| 3. Invasive elsewhere                          | 2.0  |
| B. Biology/Ecology                             | 4.0  |
| 4. Undesirable (or persistence) traits         | 4.0  |
| 5. Resource exploitation                       | 2.0  |
| 6. Reproduction                                | 0.0  |
| 7. Dispersal mechanisms                        | -2.0 |
| 8. Tolerance attributes                        | 0.0  |
| C. Climate change                              | 8.0  |
| 9. Climate change                              | 8.0  |
| Answered Questions                             |      |
| Total                                          | 55   |
| A. Biogeography/Historical                     | 13   |
| 1. Domestication/Cultivation                   | 3    |
| 2. Climate, distribution and introduction risk | 5    |
| 3. Invasive elsewhere                          | 5    |
| B. Biology/Ecology                             | 36   |
| 4. Undesirable (or persistence) traits         | 12   |
| 5. Resource exploitation                       | 2    |
| 6. Reproduction                                | 7    |
| 7. Dispersal mechanisms                        | 9    |
| 8. Tolerance attributes                        | 6    |
| C. Climate change                              | 6    |
| 9. Climate change                              | 6    |
| Sectors affected                               |      |
| Commercial                                     | 4    |
| Environmental                                  | 4    |
| Species or population nuisance traits          | 7    |

| Thresholds |      |
|------------|------|
| BRA        | -    |
| BRA+CCA    | -    |
| Confidence |      |
| BRA+CCA    | 0.51 |
| BRA        | 0.54 |
| CCA        | 0.25 |

| Date and Time       |
|---------------------|
| 16/05/2022 16:35:29 |

## AS-ISK v2

| Taxon and Assessor details         |                                                                                                                       |
|------------------------------------|-----------------------------------------------------------------------------------------------------------------------|
| Category                           | Fishes and Lampreys (freshwater)                                                                                      |
| Taxon name                         | <i>Mugil cephalus</i>                                                                                                 |
| Common name                        | flathead grey mullet                                                                                                  |
| Assessor                           | Giorgi Epitashvili                                                                                                    |
| Risk screening context             |                                                                                                                       |
| Reason and socio-economic benefits | <i>Mugil cephalus</i> is an important food fish species in the mullet family Mugilidae.                               |
| Risk assessment area               | South Caucasus                                                                                                        |
| Taxonomy                           | <i>Mugil cephalus</i> Linnaeus, 1758                                                                                  |
| Native range                       | Cosmopolitan in coastal waters of the tropical, subtropical and temperate zones of all seas. Eastern                  |
| Introduced range                   | This species was first introduced to be cultured with carp in Israel in 1957. Also introduced into                    |
| URL                                | <a href="https://www.fishbase.se/summary/Mugil-cephalus.html">https://www.fishbase.se/summary/Mugil-cephalus.html</a> |

|                                                |      | Response                                                                                                                                                                | Justification (references and/or other information) | Confidence                                                                                                                                                                                                                                                                                                                                                                                                                                                     |           |
|------------------------------------------------|------|-------------------------------------------------------------------------------------------------------------------------------------------------------------------------|-----------------------------------------------------|----------------------------------------------------------------------------------------------------------------------------------------------------------------------------------------------------------------------------------------------------------------------------------------------------------------------------------------------------------------------------------------------------------------------------------------------------------------|-----------|
| A. Biogeography/Historical                     |      |                                                                                                                                                                         |                                                     |                                                                                                                                                                                                                                                                                                                                                                                                                                                                |           |
| 1. Domestication/Cultivation                   |      |                                                                                                                                                                         |                                                     |                                                                                                                                                                                                                                                                                                                                                                                                                                                                |           |
| 1                                              | 1.01 | Has the taxon been the subject of domestication (or cultivation) for at least 20 generations?                                                                           | Yes                                                 | Flathead grey mullet is a very important aquaculture species in Egypt, where its farming has been traditional in the hoshia system in the delta region for centuries. Since the early 1960s, flathead grey mullet has also been cultured in semi-intensive ponds with tilapia and carps in Egypt. In the Russian Federation mullet aquaculture has been practised in the Black Sea and Caspian Sea regions since 1930. This species was first introduced to be | Very high |
| 2                                              | 1.02 | Is the taxon harvested in the wild and likely to be sold or used in its live form?                                                                                      | Yes                                                 | Trials on the artificial propagation of flathead grey mullet have been carried out, but most of the commercial aquaculture production of flathead grey mullet still depends on fry collected from the wild, which is cheaper.                                                                                                                                                                                                                                  | Very high |
| 3                                              | 1.03 | Does the taxon have invasive races, varieties, sub-taxa or congeners?                                                                                                   | No                                                  | The impacts of this species are currently unknown, as no studies have been done to determine how it has affected ecosystems in the invaded range. The absence of data does not equate to lack of effects. It does, however, mean that research is required to evaluate effects before conclusions can be made.                                                                                                                                                 | Medium    |
| 2. Climate, distribution and introduction risk |      |                                                                                                                                                                         |                                                     |                                                                                                                                                                                                                                                                                                                                                                                                                                                                |           |
| 4                                              | 2.01 | How similar are the climatic conditions of the Risk Assessment (RA) area and the taxon's native range?                                                                  | High                                                | This species is naturally distributed in the SC region.                                                                                                                                                                                                                                                                                                                                                                                                        | Very high |
| 5                                              | 2.02 | What is the quality of the climate matching data?                                                                                                                       | High                                                | This species is naturally distributed in the SC region.                                                                                                                                                                                                                                                                                                                                                                                                        | Very high |
| 6                                              | 2.03 | Is the taxon already present outside of captivity in the RA area?                                                                                                       | Yes                                                 | This species is naturally distributed in the SC region.                                                                                                                                                                                                                                                                                                                                                                                                        | Very high |
| 7                                              | 2.04 | How many potential vectors could the taxon use to enter in the RA area?                                                                                                 | One                                                 | This species is naturally distributed and enters in the SC region.                                                                                                                                                                                                                                                                                                                                                                                             | Very high |
| 8                                              | 2.05 | Is the taxon currently found in close proximity to, and likely to enter into, the RA area in the near future (e.g. unintentional and intentional introductions)?        | Yes                                                 | This species is naturally distributed in the SC region and also in the neighbouring countries (Russia, Turkey, Iran).                                                                                                                                                                                                                                                                                                                                          | Very high |
| 3. Invasive elsewhere                          |      |                                                                                                                                                                         |                                                     |                                                                                                                                                                                                                                                                                                                                                                                                                                                                |           |
| 9                                              | 3.01 | Has the taxon become naturalised (established viable populations) outside its native range?                                                                             | Yes                                                 | M. cephalus successfully established in the Caspian Sea basin where it hit from the Black Sea basin via the Don Canal or by accidentally, as a result of aquacultural activities (Kuljanishvili et                                                                                                                                                                                                                                                             | Very high |
| 10                                             | 3.02 | In the taxon's introduced range, are there known adverse impacts to wild stocks or commercial taxa?                                                                     | No                                                  | No such study has been conducted                                                                                                                                                                                                                                                                                                                                                                                                                               | Medium    |
| 11                                             | 3.03 | In the taxon's introduced range, are there known adverse impacts to aquaculture?                                                                                        | No                                                  | No such study has been conducted                                                                                                                                                                                                                                                                                                                                                                                                                               | Medium    |
| 12                                             | 3.04 | In the taxon's introduced range, are there known adverse impacts to ecosystem                                                                                           | No                                                  | No such study has been conducted                                                                                                                                                                                                                                                                                                                                                                                                                               | Medium    |
| 13                                             | 3.05 | In the taxon's introduced range, are there known adverse socio-economic impacts?                                                                                        | No                                                  | No such study has been conducted                                                                                                                                                                                                                                                                                                                                                                                                                               | Medium    |
| B. Biology/Ecology                             |      |                                                                                                                                                                         |                                                     |                                                                                                                                                                                                                                                                                                                                                                                                                                                                |           |
| 4. Undesirable (or persistence) traits         |      |                                                                                                                                                                         |                                                     |                                                                                                                                                                                                                                                                                                                                                                                                                                                                |           |
| 14                                             | 4.01 | Is it likely that the taxon will be poisonous or pose other risks to human health?                                                                                      | No                                                  | This species does not pose a threat to humans.                                                                                                                                                                                                                                                                                                                                                                                                                 | Very high |
| 15                                             | 4.02 | Is it likely that the taxon will smother one or more native taxa (that are not threatened or protected)?                                                                | Yes                                                 | There is a probability of that because M. cephalus is a competitor fish to native taxa.                                                                                                                                                                                                                                                                                                                                                                        | Medium    |
| 16                                             | 4.03 | Are there any threatened or protected taxa that the non-native taxon would parasitise in the RA area?                                                                   | Yes                                                 | There is a probability of that because M. cephalus is a common fish in the SC region and it is expected to compete with local threatened/protected species.                                                                                                                                                                                                                                                                                                    | High      |
| 17                                             | 4.04 | Is the taxon adaptable in terms of climatic and other environmental conditions, thus enhancing its potential persistence if it has invaded or could invade the RA area? | Yes                                                 | M. cephalus is naturally distributed in the SC region.                                                                                                                                                                                                                                                                                                                                                                                                         | Very high |
| 18                                             | 4.05 | Is the taxon likely to disrupt food-web structure/function in aquatic ecosystems if it has invaded or is likely to invade the RA                                        | No                                                  | M. cephalus is naturally distributed in the SC region and there is no such risk.                                                                                                                                                                                                                                                                                                                                                                               | Very high |
| 19                                             | 4.06 | Is the taxon likely to exert adverse impacts on ecosystem services in the RA area?                                                                                      | No                                                  | M. cephalus is naturally distributed in the SC region and there is no such risk.                                                                                                                                                                                                                                                                                                                                                                               | Very high |
| 20                                             | 4.07 | Is it likely that the taxon will host, and/or act as a vector for, recognised pests and infectious agents that are endemic in the RA                                    | Not applicable                                      | Data deficient                                                                                                                                                                                                                                                                                                                                                                                                                                                 | Low       |

|                                 |      |                                                                                                                                                                              |                |                                                                                                                                                                                     |           |
|---------------------------------|------|------------------------------------------------------------------------------------------------------------------------------------------------------------------------------|----------------|-------------------------------------------------------------------------------------------------------------------------------------------------------------------------------------|-----------|
| 21                              | 4.08 | Is it likely that the taxon will host, and/or act as a vector for, recognised pests and infectious agents that are absent from (novel to) the RA area?                       | Not applicable | Data deficient                                                                                                                                                                      | Low       |
| 22                              | 4.09 | Is it likely that the taxon will achieve a body size that will make it more likely to be released from captivity?                                                            | Yes            | Average length of <i>M. cephalus</i> is 75 cm, weight 5-6 kg, sometimes 12 kg (Ninua et al. 2013). Because of these properties, this fish is widely used in aquaculture.            | Very high |
| 23                              | 4.10 | Is the taxon capable of sustaining itself in a range of water velocity conditions (e.g. versatile in habitat use)?                                                           | No             | Adults are found in coastal waters, often entering estuaries and rivers, sometimes far-up-river, lagoons and hypersaline environments. They are usually in schools over sand or mud | Medium    |
| 24                              | 4.11 | Is it likely that the taxon's mode of existence (e.g. excretion of by-products) or behaviours (e.g. feeding) will reduce habitat quality for native taxa?                    | No             | No such fact has been detected                                                                                                                                                      | Medium    |
| 25                              | 4.12 | Is the taxon likely to maintain a viable population even when present in low densities (or persisting in adverse conditions by way of a dormant form)?                       | Not applicable | No such study has been conducted                                                                                                                                                    | Low       |
| <b>5. Resource exploitation</b> |      |                                                                                                                                                                              |                |                                                                                                                                                                                     |           |
| 26                              | 5.01 | Is the taxon likely to consume threatened or protected native taxa in the RA area?                                                                                           | No             | No such fact has been documented                                                                                                                                                    | High      |
| 27                              | 5.02 | Is the taxon likely to sequester food resources (including nutrients) to the detriment of native taxa in the RA area?                                                        | Yes            | As a native species to the Caucasus region, <i>M. cephalus</i> should be competitive to other native species in feeding.                                                            | High      |
| <b>6. Reproduction</b>          |      |                                                                                                                                                                              |                |                                                                                                                                                                                     |           |
| 28                              | 6.01 | Is the taxon likely to exhibit parental care and/or to reduce age-at-maturity in response to environmental conditions?                                                       | No             | Once eggs are laid, adult striped mullet do not provide any further parental care (Texas Parks 2005).                                                                               | Very high |
| 29                              | 6.02 | Is the taxon likely to produce viable gametes or propagules (in the RA area)?                                                                                                | Yes            | <i>M. cephalus</i> is naturally reproduces in the SC region.                                                                                                                        | Very high |
| 30                              | 6.03 | Is the taxon likely to hybridise naturally with native taxa?                                                                                                                 | No             | No such study has been conducted                                                                                                                                                    | Medium    |
| 31                              | 6.04 | Is the taxon likely to be hermaphroditic or to display asexual reproduction?                                                                                                 | Yes            | The present study documents the occurrence of an intersex condition in a natural population of mullet <i>Mugil cephalus</i> (Dhanasekar et al. 2018).                               | Very high |
| 32                              | 6.05 | Is the taxon dependent on the presence of another taxon (or specific habitat features) to complete its life cycle?                                                           | No             | This species does not have such requirements.                                                                                                                                       | Medium    |
| 33                              | 6.06 | Is the taxon known (or likely) to produce a large number of propagules or offspring within a short time span (e.g. < 1 year)?                                                | Yes            | Fecundity of <i>M. cephalus</i> is 2-8 million eggs (Ninua et al. 2013).                                                                                                            | Very high |
| 34                              | 6.07 | How many time units (days, months, years) does the taxon require to reach the age-at-first-reproduction?                                                                     | 3              | This fish sexually mature at 3 to 4 years.                                                                                                                                          | Very high |
| <b>7. Dispersal mechanisms</b>  |      |                                                                                                                                                                              |                |                                                                                                                                                                                     |           |
| 35                              | 7.01 | How many potential internal vectors/pathways could the taxon use to disperse within the RA area (with suitable vectors/pathways)?                                            | One            | This species is naturally disperse within the SC region.                                                                                                                            | High      |
| 36                              | 7.02 | Will any of these vectors/pathways bring the taxon in close proximity to one or more protected areas (e.g. MCZ, MPA, SSSI)?                                                  | Yes            | <i>M. cephalus</i> is distributed in the protected areas of the SC region, for instance in the Kolikheti National Park, western Georgia.                                            | Very high |
| 37                              | 7.03 | Does the taxon have a means of actively attaching itself to hard substrata (e.g. ship hulls, pilings, buoys) such that it enhances the likelihood of dispersal?              | No             | This fish does not have such means.                                                                                                                                                 | Very high |
| 38                              | 7.04 | Is natural dispersal of the taxon likely to occur as eggs (for animals) or as propagules (for plants: seeds, spores) in the RA area?                                         | Yes            | This species is naturally reproduces in the SC region.                                                                                                                              | Very high |
| 39                              | 7.05 | Is natural dispersal of the taxon likely to occur as larvae/juveniles (for animals) or as fragments/seedlings (for plants) in the RA area?                                   | Yes            | This species is naturally reproduces in the SC region.                                                                                                                              | Very high |
| 40                              | 7.06 | Are older life stages of the taxon likely to migrate in the RA area for reproduction?                                                                                        | Yes            | This species is naturally reproduces in the SC region.                                                                                                                              | Very high |
| 41                              | 7.07 | Are propagules or eggs of the taxon likely to be dispersed in the RA area by other animals?                                                                                  | Yes            | There is no data about this but such case is to be expected.                                                                                                                        | Medium    |
| 42                              | 7.08 | Is dispersal of the taxon along any of the vectors/pathways mentioned in the previous seven questions (35-41; i.e. both unintentional or intentional) likely to be           | Not applicable | Data deficient                                                                                                                                                                      | Low       |
| 43                              | 7.09 | Is dispersal of the taxon density dependent?                                                                                                                                 | Yes            | Own judgement                                                                                                                                                                       | Medium    |
| <b>8. Tolerance attributes</b>  |      |                                                                                                                                                                              |                |                                                                                                                                                                                     |           |
| 44                              | 8.01 | Is the taxon able to withstand being out of water for extended periods (e.g. minimum of one or more hours) at some stage of its life cycle?                                  | No             | This fish cannot exist without water.                                                                                                                                               | Very high |
| 45                              | 8.02 | Is the taxon tolerant of a wide range of water quality conditions relevant to that taxon? [In the Justification field, indicate the relevant water quality variable(s) being | Yes            | Data deficient                                                                                                                                                                      | Low       |
| 46                              | 8.03 | Can the taxon be controlled or eradicated in the wild with chemical, biological, or other agents/means?                                                                      | Yes            | Data deficient                                                                                                                                                                      | Low       |
| 47                              | 8.04 | Is the taxon likely to tolerate or benefit from environmental/human disturbance?                                                                                             | Yes            | Humans contributed to the spread of this species                                                                                                                                    | Very high |

|                          |      |                                                                                                                                                              |           |                                                                                                                                                                            |           |
|--------------------------|------|--------------------------------------------------------------------------------------------------------------------------------------------------------------|-----------|----------------------------------------------------------------------------------------------------------------------------------------------------------------------------|-----------|
| 48                       | 8.05 | Is the taxon able to tolerate salinity levels that are higher or lower than those found in its usual environment?                                            | Yes       | M. cephalus is sea shoal fish, it's easily adopted to the changeability of salt (Ninua et al. 2013).                                                                       | Very high |
| 49                       | 8.06 | Are there effective natural enemies (predators) of the taxon present in the RA area?                                                                         | Yes       | There are several predators distributed in the SC region which can controll the M. cephalus population: Esox lucius, Sander lucioperca, Silurus glanis, Salmo labrax, etc. | Very high |
| <b>C. Climate change</b> |      |                                                                                                                                                              |           |                                                                                                                                                                            |           |
| <b>9. Climate change</b> |      |                                                                                                                                                              |           |                                                                                                                                                                            |           |
| 50                       | 9.01 | Under the predicted future climatic conditions, are the risks of entry into the RA area posed by the taxon likely to increase, decrease or not change?       | No change | Own judgement                                                                                                                                                              | Medium    |
| 51                       | 9.02 | Under the predicted future climatic conditions, are the risks of establishment posed by the taxon likely to increase, decrease or not change?                | No change | Own judgement                                                                                                                                                              | Medium    |
| 52                       | 9.03 | Under the predicted future climatic conditions, are the risks of dispersal within the RA area posed by the taxon likely to increase, decrease or not change? | No change | Own judgement                                                                                                                                                              | Medium    |
| 53                       | 9.04 | Under the predicted future climatic conditions, what is the likely magnitude of future potential impacts on biodiversity and/or ecological integrity/status? | No change | Own judgement                                                                                                                                                              | Medium    |
| 54                       | 9.05 | Under the predicted future climatic conditions, what is the likely magnitude of future potential impacts on ecosystem structure and/or function?             | Lower     | Own judgement                                                                                                                                                              | Medium    |
| 55                       | 9.06 | Under the predicted future climatic conditions, what is the likely magnitude of future potential impacts on ecosystem services/socio-economic factors?       | Lower     | Own judgement                                                                                                                                                              | Medium    |

| Statistics                                     |             |
|------------------------------------------------|-------------|
| Scores                                         |             |
| <b>BRA</b>                                     | <b>22.0</b> |
| <b>BRA Outcome</b>                             | <b>-</b>    |
| <b>BRA+CCA</b>                                 | <b>18.0</b> |
| <b>BRA+CCA Outcome</b>                         | <b>-</b>    |
| Score partition                                |             |
| <b>A. Biogeography/Historical</b>              | <b>5.0</b>  |
| 1. Domestication/Cultivation                   | 2.0         |
| 2. Climate, distribution and introduction risk | 1.0         |
| 3. Invasive elsewhere                          | 2.0         |
| <b>B. Biology/Ecology</b>                      | <b>17.0</b> |
| 4. Undesirable (or persistence) traits         | 4.0         |
| 5. Resource exploitation                       | 2.0         |
| 6. Reproduction                                | 3.0         |
| 7. Dispersal mechanisms                        | 5.0         |
| 8. Tolerance attributes                        | 3.0         |
| <b>C. Climate change</b>                       | <b>-4.0</b> |
| 9. Climate change                              | -4.0        |
| Answered Questions                             |             |
| <b>Total</b>                                   | <b>55</b>   |
| <b>A. Biogeography/Historical</b>              | <b>13</b>   |
| 1. Domestication/Cultivation                   | 3           |
| 2. Climate, distribution and introduction risk | 5           |
| 3. Invasive elsewhere                          | 5           |
| <b>B. Biology/Ecology</b>                      | <b>36</b>   |
| 4. Undesirable (or persistence) traits         | 12          |
| 5. Resource exploitation                       | 2           |
| 6. Reproduction                                | 7           |
| 7. Dispersal mechanisms                        | 9           |
| 8. Tolerance attributes                        | 6           |
| <b>C. Climate change</b>                       | <b>6</b>    |
| 9. Climate change                              | 6           |
| Sectors affected                               |             |
| <b>Commercial</b>                              | <b>2</b>    |
| <b>Environmental</b>                           | <b>-1</b>   |
| <b>Species or population nuisance traits</b>   | <b>19</b>   |

| Thresholds     |             |
|----------------|-------------|
| <b>BRA</b>     | <b>-</b>    |
| <b>BRA+CCA</b> | <b>-</b>    |
| Confidence     |             |
| <b>BRA+CCA</b> | <b>0.74</b> |
| <b>BRA</b>     | <b>0.77</b> |
| <b>CCA</b>     | <b>0.50</b> |

| Date and Time       |
|---------------------|
| 13/05/2022 13:11:56 |

## AS-ISK v2

| Taxon and Assessor details         |                                                                                                                       |
|------------------------------------|-----------------------------------------------------------------------------------------------------------------------|
| Category                           | Fishes and Lampreys (freshwater)                                                                                      |
| Taxon name                         | <i>Mugil cephalus</i>                                                                                                 |
| Common name                        | flathead grey mullet                                                                                                  |
| Assessor                           | Tatia Kuljanishvili                                                                                                   |
| Risk screening context             |                                                                                                                       |
| Reason and socio-economic benefits | Commercial fisheries importance                                                                                       |
| Risk assessment area               | South Caucasus                                                                                                        |
| Taxonomy                           | Actinopteri (ray-finned fishes) > Mugiliformes (Mulletts) > Mugilidae                                                 |
| Native range                       | Cosmopolitan in coastal waters of the tropical, subtropical and temperate zones of all seas. Eastern                  |
| Introduced range                   | Caspian Sea                                                                                                           |
| URL                                | <a href="https://www.fishbase.se/summary/Mugil-cephalus.html">https://www.fishbase.se/summary/Mugil-cephalus.html</a> |

|                                                       |      |                                                                                                                                                                         | Response | Justification (references and/or other information)                                                                                                                                                                                                                                                               | Confidence |
|-------------------------------------------------------|------|-------------------------------------------------------------------------------------------------------------------------------------------------------------------------|----------|-------------------------------------------------------------------------------------------------------------------------------------------------------------------------------------------------------------------------------------------------------------------------------------------------------------------|------------|
| <b>A. Biogeography/Historical</b>                     |      |                                                                                                                                                                         |          |                                                                                                                                                                                                                                                                                                                   |            |
| <b>1. Domestication/Cultivation</b>                   |      |                                                                                                                                                                         |          |                                                                                                                                                                                                                                                                                                                   |            |
| 1                                                     | 1.01 | Has the taxon been the subject of domestication (or cultivation) for at least 20 generations?                                                                           | Yes      | It has commercial value                                                                                                                                                                                                                                                                                           | High       |
| 2                                                     | 1.02 | Is the taxon harvested in the wild and likely to be sold or used in its live form?                                                                                      | Yes      | Yes. Taxon is harvested in wild and is sold in its live form                                                                                                                                                                                                                                                      | High       |
| 3                                                     | 1.03 | Does the taxon have invasive races, varieties, sub-taxa or congeners?                                                                                                   | Yes      | Chelon labrosus (Yankova 2016) or Chelon saliens (Medium risk) (Moghaddas et al 2021)                                                                                                                                                                                                                             | High       |
| <b>2. Climate, distribution and introduction risk</b> |      |                                                                                                                                                                         |          |                                                                                                                                                                                                                                                                                                                   |            |
| 4                                                     | 2.01 | How similar are the climatic conditions of the Risk Assessment (RA) area and the taxon's native range?                                                                  | High     | Somehow similar                                                                                                                                                                                                                                                                                                   | High       |
| 5                                                     | 2.02 | What is the quality of the climate matching data?                                                                                                                       | Medium   | Medium                                                                                                                                                                                                                                                                                                            | Medium     |
| 6                                                     | 2.03 | Is the taxon already present outside of captivity in the RA area?                                                                                                       | No       | It was brought together with Chelon auratus and C. saliens, from the Black Sea and released into the Caspian Sea for acclimatization in 1930-34. Unlike Chelon auratus and C. saliens, M. cephalus could not adapt to local environmental conditions in the Caspian Sea and disappeared (Boqutskaya et al. 2013). | Medium     |
| 7                                                     | 2.04 | How many potential vectors could the taxon use to enter in the RA area?                                                                                                 | One      | Aquaculture                                                                                                                                                                                                                                                                                                       | High       |
| 8                                                     | 2.05 | Is the taxon currently found in close proximity to, and likely to enter into, the RA area in the near future (e.g. unintentional and intentional introductions)?        | No       | Probably not.                                                                                                                                                                                                                                                                                                     | Low        |
| <b>3. Invasive elsewhere</b>                          |      |                                                                                                                                                                         |          |                                                                                                                                                                                                                                                                                                                   |            |
| 9                                                     | 3.01 | Has the taxon become naturalised (established viable populations) outside its introduced range?                                                                         | Yes      | Reported as invasive in USA, Iran and Thailand <a href="https://www.gbif.org/species/8189568">https://www.gbif.org/species/8189568</a>                                                                                                                                                                            | High       |
| 10                                                    | 3.02 | In the taxon's introduced range, are there known adverse impacts to wild stocks or commercial taxa?                                                                     | No       | No adverse impacts to the wild commercial taxa are known.                                                                                                                                                                                                                                                         | Low        |
| 11                                                    | 3.03 | In the taxon's introduced range, are there known adverse impacts to aquaculture?                                                                                        | No       | No adverse impacts to aquaculture are known.                                                                                                                                                                                                                                                                      | Low        |
| 12                                                    | 3.04 | In the taxon's introduced range, are there known adverse impacts to ecosystem?                                                                                          | No       | No adverse impacts to ecosystem are known                                                                                                                                                                                                                                                                         | Low        |
| 13                                                    | 3.05 | In the taxon's introduced range, are there known adverse socio-economic impacts?                                                                                        | No       | No adverse socio-economic impacts are known                                                                                                                                                                                                                                                                       | Low        |
| <b>B. Biology/Ecology</b>                             |      |                                                                                                                                                                         |          |                                                                                                                                                                                                                                                                                                                   |            |
| <b>4. Undesirable (or persistence) traits</b>         |      |                                                                                                                                                                         |          |                                                                                                                                                                                                                                                                                                                   |            |
| 14                                                    | 4.01 | Is it likely that the taxon will be poisonous or pose other risks to human health?                                                                                      | No       | Not poisonous                                                                                                                                                                                                                                                                                                     | Very high  |
| 15                                                    | 4.02 | Is it likely that the taxon will smother one or more native taxa (that are not threatened or protected)?                                                                | No       | It is not known                                                                                                                                                                                                                                                                                                   | Low        |
| 16                                                    | 4.03 | Are there any threatened or protected taxa that the non-native taxon would parasitise in the RA area?                                                                   | No       | Does not parasitise                                                                                                                                                                                                                                                                                               | Very high  |
| 17                                                    | 4.04 | Is the taxon adaptable in terms of climatic and other environmental conditions, thus enhancing its potential persistence if it has invaded or could invade the RA area? | Yes      | This species can tolerate wide ranges of salinities                                                                                                                                                                                                                                                               | Medium     |
| 18                                                    | 4.05 | Is the taxon likely to disrupt food-web structure/function in aquatic ecosystems if it has invaded or is likely to invade the RA area?                                  | No       | Not documented                                                                                                                                                                                                                                                                                                    | Low        |
| 19                                                    | 4.06 | Is the taxon likely to exert adverse impacts on ecosystem services in the RA area?                                                                                      | No       | transmit diseases                                                                                                                                                                                                                                                                                                 | Medium     |
| 20                                                    | 4.07 | Is it likely that the taxon will host, and/or act as a vector for, recognised pests and infectious agents that are endemic in the RA area?                              | Yes      | no info                                                                                                                                                                                                                                                                                                           | Low        |
| 21                                                    | 4.08 | Is it likely that the taxon will host, and/or act as a vector for, recognised pests and infectious agents that are absent from (novel to) the RA area?                  | Yes      | No info                                                                                                                                                                                                                                                                                                           | Low        |
| 22                                                    | 4.09 | Is it likely that the taxon will achieve a body size that will make it more likely to be released from captivity?                                                       | Yes      | Yes. See: <a href="https://www.fishbase.se/summary/Mugil-cephalus.html">https://www.fishbase.se/summary/Mugil-cephalus.html</a>                                                                                                                                                                                   | High       |

|                                 |      |                                                                                                                                                                              |     |                                                                                                                                                                               |           |
|---------------------------------|------|------------------------------------------------------------------------------------------------------------------------------------------------------------------------------|-----|-------------------------------------------------------------------------------------------------------------------------------------------------------------------------------|-----------|
| 23                              | 4.10 | Is the taxon capable of sustaining itself in a range of water velocity conditions (e.g. versatile in habitat use)?                                                           | Yes | Yes. this specie is marine, which sometimes enters freshwaters                                                                                                                | High      |
| 24                              | 4.11 | Is it likely that the taxon's mode of existence (e.g. excretion of by-products) or behaviours (e.g. feeding) will reduce habitat quality for native taxa?                    | No  | No information available                                                                                                                                                      | High      |
| 25                              | 4.12 | Is the taxon likely to maintain a viable population even when present in low densities (or persisting in adverse conditions by way of a dormant form)?                       | No  | Less likely, since all the attempts to breed this species in caspian sea failed,                                                                                              | Medium    |
| <b>5. Resource exploitation</b> |      |                                                                                                                                                                              |     |                                                                                                                                                                               |           |
| 26                              | 5.01 | Is the taxon likely to consume threatened or protected native taxa in the RA area?                                                                                           | No  | They are mainly diurnal, feeding on detritus, micro-algae and benthic organisms (Ref. 56548, 74902, 74760). Juveniles feed on zooplankton until about 3.0 cm SL (Ref. 59043). | Medium    |
| 27                              | 5.02 | Is the taxon likely to sequester food resources (including nutrients) to the detriment of native taxa in the RA area?                                                        | No  | No. Less likely                                                                                                                                                               | High      |
| <b>6. Reproduction</b>          |      |                                                                                                                                                                              |     |                                                                                                                                                                               |           |
| 28                              | 6.01 | Is the taxon likely to exhibit parental care and/or to reduce age-at-maturity in response to environmental conditions?                                                       | No  | No. Does not exhibit parental care See: <a href="https://www.fishbase.se/summary/Mugil-cephalus.html">https://www.fishbase.se/summary/Mugil-cephalus.html</a>                 | High      |
| 29                              | 6.02 | Is the taxon likely to produce viable gametes or propagules (in the RA area)?                                                                                                | No  | No. climate is not suitable                                                                                                                                                   | Very high |
| 30                              | 6.03 | Is the taxon likely to hybridise naturally with native taxa?                                                                                                                 | No  | No information available                                                                                                                                                      | Very high |
| 31                              | 6.04 | Is the taxon likely to be hermaphroditic or to display asexual reproduction?                                                                                                 | No  | No. Does not display asexual reproduction                                                                                                                                     | Very high |
| 32                              | 6.05 | Is the taxon dependent on the presence of another taxon (or specific habitat features) to complete its life cycle?                                                           | No  | No. See: <a href="https://www.fishbase.se/summary/Mugil-cephalus.html">https://www.fishbase.se/summary/Mugil-cephalus.html</a>                                                | Very high |
| 33                              | 6.06 | Is the taxon known (or likely) to produce a large number of propagules or offspring within a short time span (e.g. < 1 year)?                                                | Yes | 0.5–2.0 million eggs per female                                                                                                                                               | Very high |
| 34                              | 6.07 | How many time units (days, months, years) does the taxon require to reach the age-at-first-reproduction?                                                                     | 3   | 3-4 years                                                                                                                                                                     | Very high |
| <b>7. Dispersal mechanisms</b>  |      |                                                                                                                                                                              |     |                                                                                                                                                                               |           |
| 35                              | 7.01 | How many potential internal vectors/pathways could the taxon use to disperse within the RA area (with suitable)                                                              | One | Aquaculture                                                                                                                                                                   | Low       |
| 36                              | 7.02 | Will any of these vectors/pathways bring the taxon in close proximity to one or more protected areas (e.g. MCZ, MPA, SSSI)?                                                  | No  | less likely                                                                                                                                                                   | High      |
| 37                              | 7.03 | Does the taxon have a means of actively attaching itself to hard substrata (e.g. ship hulls, pilings, buoys) such that it enhances the likelihood of dispersal?              | No  | No. See: <a href="https://www.fishbase.se/summary/Mugil-cephalus.html">https://www.fishbase.se/summary/Mugil-cephalus.html</a>                                                | Very high |
| 38                              | 7.04 | Is natural dispersal of the taxon likely to occur as eggs (for animals) or as propagules (for plants: seeds, spores) in the RA area?                                         | No  | No. can not be distributed as eggs.                                                                                                                                           | Very high |
| 39                              | 7.05 | Is natural dispersal of the taxon likely to occur as larvae/juveniles (for animals) or as fragments/seedlings (for plants) in the RA area?                                   | No  | Does not migrate for reproduction                                                                                                                                             | Very high |
| 40                              | 7.06 | Are older life stages of the taxon likely to migrate in the RA area for reproduction?                                                                                        | No  | No. Can not be dispersed by other animals                                                                                                                                     | High      |
| 41                              | 7.07 | Are propagules or eggs of the taxon likely to be dispersed in the RA area by other animals?                                                                                  | No  | NO information available                                                                                                                                                      | Very high |
| 42                              | 7.08 | Is dispersal of the taxon along any of the vectors/pathways mentioned in the previous seven questions (35–41; i.e. both unintentional or intentional) likely to be           | No  | No data                                                                                                                                                                       | Medium    |
| 43                              | 7.09 | Is dispersal of the taxon density dependent?                                                                                                                                 | No  | No information available                                                                                                                                                      | Low       |
| <b>8. Tolerance attributes</b>  |      |                                                                                                                                                                              |     |                                                                                                                                                                               |           |
| 44                              | 8.01 | Is the taxon able to withstand being out of water for extended periods (e.g. minimum of one or more hours) at some stage of its life cycle?                                  | No  | No. This is less likely.                                                                                                                                                      | High      |
| 45                              | 8.02 | Is the taxon tolerant of a wide range of water quality conditions relevant to that taxon? [In the Justification field, indicate the relevant water quality variable(s) being | Yes | it can tolerate wide range of temperatures and salinities                                                                                                                     | High      |
| 46                              | 8.03 | Can the taxon be controlled or eradicated in the wild with chemical, biological, or other agents/means?                                                                      | No  | No information available                                                                                                                                                      | High      |
| 47                              | 8.04 | Is the taxon likely to tolerate or benefit from environmental/human disturbance?                                                                                             | No  | No information available                                                                                                                                                      | Very high |
| 48                              | 8.05 | Is the taxon able to tolerate salinity levels that are higher or lower than those found in its usual environment?                                                            | No  | No documentation                                                                                                                                                              | Very high |
| 49                              | 8.06 | Are there effective natural enemies (predators) of the taxon present in the RA                                                                                               | No  | No.No effective natural enemies present in RA area                                                                                                                            | Very high |
| <b>C. Climate change</b>        |      |                                                                                                                                                                              |     |                                                                                                                                                                               |           |
| <b>9. Climate change</b>        |      |                                                                                                                                                                              |     |                                                                                                                                                                               |           |



|    |      |                                                                                                                                                              |           |                                                                                                                                                                                                                                                      |        |
|----|------|--------------------------------------------------------------------------------------------------------------------------------------------------------------|-----------|------------------------------------------------------------------------------------------------------------------------------------------------------------------------------------------------------------------------------------------------------|--------|
| 50 | 9.01 | Under the predicted future climatic conditions, are the risks of entry into the RA area posed by the taxon likely to increase, decrease or not change?       | Increase  | It was hypothesized that climate change might alert the mechanisms of transportation and introduction of non-native species. Commercial and recreational activities will increase, that itself increases the propagule pressure levels of non-native | High   |
| 51 | 9.02 | Under the predicted future climatic conditions, are the risks of establishment posed by the taxon likely to increase, decrease or not change?                | Increase  | It might increase                                                                                                                                                                                                                                    | Medium |
| 52 | 9.03 | Under the predicted future climatic conditions, are the risks of dispersal within the RA area posed by the taxon likely to increase, decrease or not change? | Increase  | Might increase                                                                                                                                                                                                                                       | Low    |
| 53 | 9.04 | Under the predicted future climatic conditions, what is the likely magnitude of future potential impacts on biodiversity and/or ecological integrity/status? | No change | No change                                                                                                                                                                                                                                            | Medium |
| 54 | 9.05 | Under the predicted future climatic conditions, what is the likely magnitude of future potential impacts on ecosystem structure and/or function?             | No change | NO change                                                                                                                                                                                                                                            | Medium |
| 55 | 9.06 | Under the predicted future climatic conditions, what is the likely magnitude of future potential impacts on ecosystem services/socio-economic factors?       | No change | No change                                                                                                                                                                                                                                            | Medium |

| Statistics                                     |             |
|------------------------------------------------|-------------|
| Scores                                         |             |
| <b>BRA</b>                                     | <b>6.0</b>  |
| <b>BRA Outcome</b>                             | <b>-</b>    |
| <b>BRA+CCA</b>                                 | <b>12.0</b> |
| <b>BRA+CCA Outcome</b>                         | <b>-</b>    |
| Score partition                                |             |
| <b>A. Biogeography/Historical</b>              | <b>6.0</b>  |
| 1. Domestication/Cultivation                   | 4.0         |
| 2. Climate, distribution and introduction risk | 0.0         |
| 3. Invasive elsewhere                          | 2.0         |
| <b>B. Biology/Ecology</b>                      | <b>0.0</b>  |
| 4. Undesirable (or persistence) traits         | 5.0         |
| 5. Resource exploitation                       | 0.0         |
| 6. Reproduction                                | 0.0         |
| 7. Dispersal mechanisms                        | -5.0        |
| 8. Tolerance attributes                        | 0.0         |
| <b>C. Climate change</b>                       | <b>6.0</b>  |
| 9. Climate change                              | 6.0         |
| Answered Questions                             |             |
| <b>Total</b>                                   | <b>55</b>   |
| <b>A. Biogeography/Historical</b>              | <b>13</b>   |
| 1. Domestication/Cultivation                   | 3           |
| 2. Climate, distribution and introduction risk | 5           |
| 3. Invasive elsewhere                          | 5           |
| <b>B. Biology/Ecology</b>                      | <b>36</b>   |
| 4. Undesirable (or persistence) traits         | 12          |
| 5. Resource exploitation                       | 2           |
| 6. Reproduction                                | 7           |
| 7. Dispersal mechanisms                        | 9           |
| 8. Tolerance attributes                        | 6           |
| <b>C. Climate change</b>                       | <b>6</b>    |
| 9. Climate change                              | 6           |
| Sectors affected                               |             |
| <b>Commercial</b>                              | <b>3</b>    |
| <b>Environmental</b>                           | <b>0</b>    |
| <b>Species or population nuisance traits</b>   | <b>9</b>    |

| Thresholds     |             |
|----------------|-------------|
| <b>BRA</b>     | <b>-</b>    |
| <b>BRA+CCA</b> | <b>-</b>    |
| Confidence     |             |
| <b>BRA+CCA</b> | <b>0.66</b> |
| <b>BRA</b>     | <b>0.68</b> |
| <b>CCA</b>     | <b>0.50</b> |

| Date and Time       |  |
|---------------------|--|
| 21/05/2022 14:56:22 |  |

AS-ISK v2

| Taxon and Assessor details         |                                                                                                                                       |
|------------------------------------|---------------------------------------------------------------------------------------------------------------------------------------|
| Category                           | Fishes and Lampreys (freshwater)                                                                                                      |
| Taxon name                         | <i>Mylopharyngodon piceus</i>                                                                                                         |
| Common name                        | black carp                                                                                                                            |
| Assessor                           | Bella Japoshvili                                                                                                                      |
| Risk screening context             |                                                                                                                                       |
| Reason and socio-economic benefits | This species is widely introduced in EU and USA for a number of reasons. It was also introduced in                                    |
| Risk assessment area               | South Caucasus                                                                                                                        |
| Taxonomy                           | Actinopteri (ray-finned fishes) > Cypriniformes (Carp) > Xenocypridae (East Asian minnows)                                            |
| Native range                       | East Asia                                                                                                                             |
| Introduced range                   | West Eurasia                                                                                                                          |
| URL                                | <a href="https://www.fishbase.de/summary/Mylopharyngodon-piceus.html">https://www.fishbase.de/summary/Mylopharyngodon-piceus.html</a> |

|                                                |      |                                                                                                                                                                         | Response | Justification (references and/or other information)                                                                                                                                                                                                                                                                                                                                                                    | Confidence |
|------------------------------------------------|------|-------------------------------------------------------------------------------------------------------------------------------------------------------------------------|----------|------------------------------------------------------------------------------------------------------------------------------------------------------------------------------------------------------------------------------------------------------------------------------------------------------------------------------------------------------------------------------------------------------------------------|------------|
| A. Biogeography/Historical                     |      |                                                                                                                                                                         |          |                                                                                                                                                                                                                                                                                                                                                                                                                        |            |
| 1. Domestication/Cultivation                   |      |                                                                                                                                                                         |          |                                                                                                                                                                                                                                                                                                                                                                                                                        |            |
| 1                                              | 1.01 | Has the taxon been the subject of domestication (or cultivation) for at least 20 generations?                                                                           | Yes      | Kottelat, M., & Freyhof, J. (2007). Handbook of European freshwater fishes. Publications Kottelat.                                                                                                                                                                                                                                                                                                                     | Very high  |
| 2                                              | 1.02 | Is the taxon harvested in the wild and likely to be sold or used in its live form?                                                                                      | Yes      | This species usually is harvested for domestic purposes but in most case with other chinse carps accidentally and then transported and sold as such                                                                                                                                                                                                                                                                    | Very high  |
| 3                                              | 1.03 | Does the taxon have invasive races, varieties, sub-taxa or congeners?                                                                                                   | No       | Although there are other chinse carps known "for famous domestic fishes", no other congeners or races as invasive is known                                                                                                                                                                                                                                                                                             | Medium     |
| 2. Climate, distribution and introduction risk |      |                                                                                                                                                                         |          |                                                                                                                                                                                                                                                                                                                                                                                                                        |            |
| 4                                              | 2.01 | How similar are the climatic conditions of the Risk Assessment (RA) area and the taxon's native range?                                                                  | Medium   | Result of climatch algorithm                                                                                                                                                                                                                                                                                                                                                                                           | Medium     |
| 5                                              | 2.02 | What is the quality of the climate matching data?                                                                                                                       | Low      | Due to low accuracy of local climate data                                                                                                                                                                                                                                                                                                                                                                              | High       |
| 6                                              | 2.03 | Is the taxon already present outside of captivity in the RA area?                                                                                                       | Yes      | CABI, 2022. Mylopharyngodon piceus (Black carp). <a href="https://www.cabi.org/isc/datasheet/73511">https://www.cabi.org/isc/datasheet/73511</a> (accessed October                                                                                                                                                                                                                                                     | High       |
| 7                                              | 2.04 | How many potential vectors could the taxon use to enter in the RA area?                                                                                                 | >1       | For biocontrol and aquaculture                                                                                                                                                                                                                                                                                                                                                                                         | High       |
| 8                                              | 2.05 | Is the taxon currently found in close proximity to, and likely to enter into, the RA area in the near future (e.g. unintentional and intentional introductions)?        | No       | Not reported in wild or nearby                                                                                                                                                                                                                                                                                                                                                                                         | Medium     |
| 3. Invasive elsewhere                          |      |                                                                                                                                                                         |          |                                                                                                                                                                                                                                                                                                                                                                                                                        |            |
| 9                                              | 3.01 | Has the taxon become naturalised (established viable populations) outside its                                                                                           | Yes      | CABI, 2022. Mylopharyngodon piceus (Black carp). <a href="https://www.cabi.org/isc/datasheet/73511">https://www.cabi.org/isc/datasheet/73511</a> (accessed October                                                                                                                                                                                                                                                     | Very high  |
| 10                                             | 3.02 | In the taxon's introduced range, are there known adverse impacts to wild stocks or commercial taxa?                                                                     | Yes      | Rothbard S, Rubinshtein I, Shelton WL, 1996. The Black Carp, Mylopharyngodon piceus, as a Biocontrol of Freshwater Molluscs, YAFIT Laboratory, Fish Breeding Center, Israel, University of Oklahoma.                                                                                                                                                                                                                   | Very high  |
| 11                                             | 3.03 | In the taxon's introduced range, are there known adverse impacts to aquaculture?                                                                                        | No       | Usually it considered as bearing positive efect on aquaculture (CABI, 2022. Mylopharyngodon piceus (Black carp). <a href="https://www.cabi.org/isc/datasheet/73511">https://www.cabi.org/isc/datasheet/73511</a> (accessed October                                                                                                                                                                                     | Medium     |
| 12                                             | 3.04 | In the taxon's introduced range, are there known adverse impacts to ecosystem services?                                                                                 | Yes      | Nico LG, 2011. Mylopharyngodon piceus. USGS Nonindigenous Aquatic Species Database. Gainesville, Florida, USA: USGS. <a href="http://nas.er.usgs.gov/queries/factsheet.aspx?SpeciesID=573">http://nas.er.usgs.gov/queries/factsheet.aspx?SpeciesID=573</a>                                                                                                                                                             | Low        |
| 13                                             | 3.05 | In the taxon's introduced range, are there known adverse socio-economic impacts?                                                                                        | No       | Not reported although expected                                                                                                                                                                                                                                                                                                                                                                                         | Low        |
| B. Biology/Ecology                             |      |                                                                                                                                                                         |          |                                                                                                                                                                                                                                                                                                                                                                                                                        |            |
| 4. Undesirable (or persistence) traits         |      |                                                                                                                                                                         |          |                                                                                                                                                                                                                                                                                                                                                                                                                        |            |
| 14                                             | 4.01 | Is it likely that the taxon will be poisonous or pose other risks to human health?                                                                                      | No       | Not a harmful species for human health                                                                                                                                                                                                                                                                                                                                                                                 | Medium     |
| 15                                             | 4.02 | Is it likely that the taxon will smother one or more native taxa (that are not threatened or protected)?                                                                | Yes      | Rothbard S, Rubinshtein I, Shelton WL, 1996. The Black Carp, Mylopharyngodon piceus, as a Biocontrol of Freshwater Molluscs, YAFIT Laboratory, Fish Breeding Center, Israel, University of Oklahoma.                                                                                                                                                                                                                   | Very high  |
| 16                                             | 4.03 | Are there any threatened or protected taxa that the non-native taxon would parasitise in the RA area?                                                                   | No       | The species is predator. And a large number of invertebrates - in particular molluscs and foshes can be decline due to this species. CABI, 2022. Mylopharyngodon piceus (Black carp). <a href="https://www.cabi.org/isc/datasheet/73511">https://www.cabi.org/isc/datasheet/73511</a> (accessed October 2022). However, Currently not a threatened species are known from RA area that might be altered from this fish | Low        |
| 17                                             | 4.04 | Is the taxon adaptable in terms of climatic and other environmental conditions, thus enhancing its potential persistence if it has invaded or could invade the RA area? | No       | No enough information is available                                                                                                                                                                                                                                                                                                                                                                                     | Low        |
| 18                                             | 4.05 | Is the taxon likely to disrupt food-web structure/function in aquatic ecosystems if it has invaded or is likely to invade the RA                                        | Yes      | CABI, 2022. Mylopharyngodon piceus (Black carp). <a href="https://www.cabi.org/isc/datasheet/73511">https://www.cabi.org/isc/datasheet/73511</a> (accessed October 2022)                                                                                                                                                                                                                                               | Medium     |
| 19                                             | 4.06 | Is the taxon likely to exert adverse impacts on ecosystem services in the RA area?                                                                                      | Yes      | based on the examples of elsewhere (CABI, 2022. Mylopharyngodon piceus (Black carp). <a href="https://www.cabi.org/isc/datasheet/73511">https://www.cabi.org/isc/datasheet/73511</a> (accessed October                                                                                                                                                                                                                 | Low        |
| 20                                             | 4.07 | Is it likely that the taxon will host, and/or act as a vector for, recognised pests and infectious agents that are endemic in the RA                                    | No       | Not expected due to absence of endemic parasite/pathogens for RA area                                                                                                                                                                                                                                                                                                                                                  | Low        |

|                                 |      |                                                                                                                                                                              |     |                                                                                                                                                                                                                                                                                                                |           |
|---------------------------------|------|------------------------------------------------------------------------------------------------------------------------------------------------------------------------------|-----|----------------------------------------------------------------------------------------------------------------------------------------------------------------------------------------------------------------------------------------------------------------------------------------------------------------|-----------|
| 21                              | 4.08 | Is it likely that the taxon will host, and/or act as a vector for, recognised pests and infectious agents that are absent from (novel to) the RA area?                       | Yes | CABI, 2022. <i>Mylopharyngodon piceus</i> (Black carp). <a href="https://www.cabi.org/isc/datasheet/73511">https://www.cabi.org/isc/datasheet/73511</a> (accessed October 2022)                                                                                                                                | Very high |
| 22                              | 4.09 | Is it likely that the taxon will achieve a body size that will make it more likely to be released from captivity?                                                            | Yes | The species can reach large size enough to be unsuitable for small water reservoirs                                                                                                                                                                                                                            | High      |
| 23                              | 4.10 | Is the taxon capable of sustaining itself in a range of water velocity conditions (e.g. versatile in habitat use)?                                                           | Yes | The species is basically attached to a lentic systems but moves for reproduction to upstreams (Nico, L.G., J.D. Williams and H.L. Jelks, 2005. Black carp: biological synopsis and risk assessment of an introduced fish. American Fisheries Society, Bethesda, Maryland, USA. 337 p)                          | High      |
| 24                              | 4.11 | Is it likely that the taxon's mode of existence (e.g. excretion of by-products) or behaviours (e.g. feeding) will reduce habitat quality for native taxa?                    | No  | No enough data is available                                                                                                                                                                                                                                                                                    | Low       |
| 25                              | 4.12 | Is the taxon likely to maintain a viable population even when present in low densities (or persisting in adverse conditions by way of a dormant form)?                       | No  | No documented evidence exists                                                                                                                                                                                                                                                                                  | Low       |
| <b>5. Resource exploitation</b> |      |                                                                                                                                                                              |     |                                                                                                                                                                                                                                                                                                                |           |
| 26                              | 5.01 | Is the taxon likely to consume threatened or protected native taxa in the RA area?                                                                                           | Yes | It is strong predator hunting diverse prey                                                                                                                                                                                                                                                                     | Very high |
| 27                              | 5.02 | Is the taxon likely to sequester food resources (including nutrients) to the detriment of native taxa in the RA area?                                                        | Yes | This can be mostly other predator on benthic feeder fishes                                                                                                                                                                                                                                                     | Medium    |
| <b>6. Reproduction</b>          |      |                                                                                                                                                                              |     |                                                                                                                                                                                                                                                                                                                |           |
| 28                              | 6.01 | Is the taxon likely to exhibit parental care and/or to reduce age-at-maturity in response to environmental conditions?                                                       | No  | No such behavior is known                                                                                                                                                                                                                                                                                      | High      |
| 29                              | 6.02 | Is the taxon likely to produce viable gametes or propagules (in the RA area)?                                                                                                | No  | Kuljanishvili, T., Mumladze, L., Japoshvili, B., Mustafayev, N., Ibrahimov, S., Patoka, J., ... & Kalous, L. (2021). The first unified inventory of non-native fishes of the South Caucasian countries, Armenia, Azerbaijan, and Georgia. <i>Knowledge &amp; Management of Aquatic Ecosystems</i> , (422), 32. | High      |
| 30                              | 6.03 | Is the taxon likely to hybridise naturally with native taxa?                                                                                                                 | No  | Not expected based on professional judgement                                                                                                                                                                                                                                                                   | High      |
| 31                              | 6.04 | Is the taxon likely to be hermaphroditic or to display asexual reproduction?                                                                                                 | No  | Species is usually sexually reproducing                                                                                                                                                                                                                                                                        | High      |
| 32                              | 6.05 | Is the taxon dependent on the presence of another taxon (or specific habitat features) to complete its life cycle?                                                           | No  | No such requirement is known for this species                                                                                                                                                                                                                                                                  | High      |
| 33                              | 6.06 | Is the taxon known (or likely) to produce a large number of propagules or offspring within a short time span (e.g. < 1 year)?                                                | Yes | Hundreds of thousands of eggs are produced annually                                                                                                                                                                                                                                                            | High      |
| 34                              | 6.07 | How many time units (days, months, years) does the taxon require to reach the age-at-first-reproduction?                                                                     | 6   | Kottelat, M., & Freyhof, J. (2007). Handbook of European freshwater fishes. Publications Kottelat.                                                                                                                                                                                                             | High      |
| <b>7. Dispersal mechanisms</b>  |      |                                                                                                                                                                              |     |                                                                                                                                                                                                                                                                                                                |           |
| 35                              | 7.01 | How many potential internal vectors/pathways could the taxon use to disperse within the RA area (with suitable)?                                                             | > 1 | Intentional introduction and unintentional introduction along with other Chinese carps                                                                                                                                                                                                                         | High      |
| 36                              | 7.02 | Will any of these vectors/pathways bring the taxon in close proximity to one or more protected areas (e.g. MCZ, MPA, SSSI)?                                                  | Yes | Colcheti national park along the Black Sea                                                                                                                                                                                                                                                                     | High      |
| 37                              | 7.03 | Does the taxon have a means of actively attaching itself to hard substrata (e.g. ship hulls, pilings, buoys) such that it enhances the likelihood of dispersal?              | No  | No such behavior is recorded for this species                                                                                                                                                                                                                                                                  | Very high |
| 38                              | 7.04 | Is natural dispersal of the taxon likely to occur as eggs (for animals) or as propagules (for plants: seeds, spores) in the RA area?                                         | Yes | Kottelat, M., & Freyhof, J. (2007). Handbook of European freshwater fishes. Publications Kottelat.                                                                                                                                                                                                             | High      |
| 39                              | 7.05 | Is natural dispersal of the taxon likely to occur as larvae/juveniles (for animals) or as fragments/seedlings (for plants) in the RA area?                                   | Yes | Eggs are usually transported by a water currents downstream (Nico, L.G., J.D. Williams and H.L. Jelks, 2005. Black carp: biological synopsis and risk assessment of an introduced fish. American Fisheries Society, Bethesda, Maryland, USA. 337 p)                                                            | Medium    |
| 40                              | 7.06 | Are older life stages of the taxon likely to migrate in the RA area for reproduction?                                                                                        | No  | Not expected due to absence of intensive transboundary river system with countries where the species is established                                                                                                                                                                                            | High      |
| 41                              | 7.07 | Are propagules or eggs of the taxon likely to be dispersed in the RA area by other animals?                                                                                  | No  | No such fact is ever observed                                                                                                                                                                                                                                                                                  | Very high |
| 42                              | 7.08 | Is dispersal of the taxon along any of the vectors/pathways mentioned in the previous seven questions (35-41; i.e. both unintentional or intentional) likely to be           | No  | Not large number of individuals are introduced for aquacultural purpose, neither hitchhikers are usually dense. However this has never been studied                                                                                                                                                            | Medium    |
| 43                              | 7.09 | Is dispersal of the taxon density dependent?                                                                                                                                 | No  | No documented evidence exists                                                                                                                                                                                                                                                                                  | Medium    |
| <b>8. Tolerance attributes</b>  |      |                                                                                                                                                                              |     |                                                                                                                                                                                                                                                                                                                |           |
| 44                              | 8.01 | Is the taxon able to withstand being out of water for extended periods (e.g. minimum of one or more hours) at some stage of its life cycle?                                  | No  | No documented evidence exists                                                                                                                                                                                                                                                                                  | Medium    |
| 45                              | 8.02 | Is the taxon tolerant of a wide range of water quality conditions relevant to that taxon? [In the Justification field, indicate the relevant water quality variable(s) being | No  | No evidence exists that species tolerates wider variation of environmental conditions than presented in its natural distribution area                                                                                                                                                                          | Medium    |

|                          |      |                                                                                                                                                              |           |                                |        |
|--------------------------|------|--------------------------------------------------------------------------------------------------------------------------------------------------------------|-----------|--------------------------------|--------|
| 46                       | 8.03 | Can the taxon be controlled or eradicated in the wild with chemical, biological, or other agents/means?                                                      | No        | No documented evidence exists  | Medium |
| 47                       | 8.04 | Is the taxon likely to tolerate or benefit from environmental/human disturbance?                                                                             | No        | No documented evidence exists  | Low    |
| 48                       | 8.05 | Is the taxon able to tolerate salinity levels that are higher or lower than those found in its usual environment?                                            | No        | No documented evidence exists  | Medium |
| 49                       | 8.06 | Are there effective natural enemies (predators) of the taxon present in the RA                                                                               | No        | No documented evidence exists  | High   |
| <b>C. Climate change</b> |      |                                                                                                                                                              |           |                                |        |
| <b>9. Climate change</b> |      |                                                                                                                                                              |           |                                |        |
| 50                       | 9.01 | Under the predicted future climatic conditions, are the risks of entry into the RA area posed by the taxon likely to increase, decrease or not change?       | No change | Based on professional judgment | Low    |
| 51                       | 9.02 | Under the predicted future climatic conditions, are the risks of establishment posed by the taxon likely to increase, decrease or not change?                | Increase  | Based on professional judgment | Low    |
| 52                       | 9.03 | Under the predicted future climatic conditions, are the risks of dispersal within the RA area posed by the taxon likely to increase, decrease or not change? | Increase  | Based on professional judgment | Low    |
| 53                       | 9.04 | Under the predicted future climatic conditions, what is the likely magnitude of future potential impacts on biodiversity and/or ecological integrity/status? | Higher    | Based on professional judgment | Low    |
| 54                       | 9.05 | Under the predicted future climatic conditions, what is the likely magnitude of future potential impacts on ecosystem structure and/or function?             | Higher    | Based on professional judgment | Low    |
| 55                       | 9.06 | Under the predicted future climatic conditions, what is the likely magnitude of future potential impacts on ecosystem services/socio-economic factors?       | Higher    | Based on professional judgment | Low    |

| Statistics                                     |             |
|------------------------------------------------|-------------|
| Scores                                         |             |
| <b>BRA</b>                                     | <b>24.0</b> |
| <b>BRA Outcome</b>                             | <b>-</b>    |
| <b>BRA+CCA</b>                                 | <b>34.0</b> |
| <b>BRA+CCA Outcome</b>                         | <b>-</b>    |
| Score partition                                |             |
| <b>A. Biogeography/Historical</b>              | <b>14.0</b> |
| 1. Domestication/Cultivation                   | 2.0         |
| 2. Climate, distribution and introduction risk | 2.0         |
| 3. Invasive elsewhere                          | 10.0        |
| <b>B. Biology/Ecology</b>                      | <b>10.0</b> |
| 4. Undesirable (or persistence) traits         | 5.0         |
| 5. Resource exploitation                       | 7.0         |
| 6. Reproduction                                | -1.0        |
| 7. Dispersal mechanisms                        | 1.0         |
| 8. Tolerance attributes                        | -2.0        |
| <b>C. Climate change</b>                       | <b>10.0</b> |
| 9. Climate change                              | 10.0        |
| Answered Questions                             |             |
| <b>Total</b>                                   | <b>55</b>   |
| <b>A. Biogeography/Historical</b>              | <b>13</b>   |
| 1. Domestication/Cultivation                   | 3           |
| 2. Climate, distribution and introduction risk | 5           |
| 3. Invasive elsewhere                          | 5           |
| <b>B. Biology/Ecology</b>                      | <b>36</b>   |
| 4. Undesirable (or persistence) traits         | 12          |
| 5. Resource exploitation                       | 2           |
| 6. Reproduction                                | 7           |
| 7. Dispersal mechanisms                        | 9           |
| 8. Tolerance attributes                        | 6           |
| <b>C. Climate change</b>                       | <b>6</b>    |
| 9. Climate change                              | 6           |
| Sectors affected                               |             |
| <b>Commercial</b>                              | <b>12</b>   |
| <b>Environmental</b>                           | <b>16</b>   |
| <b>Species or population nuisance traits</b>   | <b>10</b>   |

| Thresholds     |             |
|----------------|-------------|
| <b>BRA</b>     | <b>-</b>    |
| <b>BRA+CCA</b> | <b>-</b>    |
| Confidence     |             |
| <b>BRA+CCA</b> | <b>0.59</b> |
| <b>BRA</b>     | <b>0.63</b> |
| <b>CCA</b>     | <b>0.25</b> |

| Date and Time       |
|---------------------|
| 16/05/2022 17:05:32 |

AS-ISK v2

| Taxon and Assessor details         |                                                                                                                                       |
|------------------------------------|---------------------------------------------------------------------------------------------------------------------------------------|
| Category                           | Fishes and Lampreys (freshwater)                                                                                                      |
| Taxon name                         | <i>Mylopharyngodon piceus</i>                                                                                                         |
| Common name                        | black carp                                                                                                                            |
| Assessor                           | Giorgi Epitashvili                                                                                                                    |
| Risk screening context             |                                                                                                                                       |
| Reason and socio-economic benefits | It is widely cultivated for food and Chinese medicine. In China, black carp are the most highly                                       |
| Risk assessment area               | South Caucasus                                                                                                                        |
| Taxonomy                           | <i>Mylopharyngodon piceus</i> (Richardson, 1846).                                                                                     |
| Native range                       | Asia: Amur river basin to southern China. Reported from Vietnam. Native stocks in Russia have                                         |
| Introduced range                   | Persists only in Europe by stocking or accidental releases. It was first brought into the USA in the                                  |
| URL                                | <a href="https://www.fishbase.in/summary/Mylopharyngodon-piceus.html">https://www.fishbase.in/summary/Mylopharyngodon-piceus.html</a> |

|                                                |      |                                                                                                                                                                         | Response       | Justification (references and/or other information)                                                                                                                                                                                                                                                                                                                                                                | Confidence |
|------------------------------------------------|------|-------------------------------------------------------------------------------------------------------------------------------------------------------------------------|----------------|--------------------------------------------------------------------------------------------------------------------------------------------------------------------------------------------------------------------------------------------------------------------------------------------------------------------------------------------------------------------------------------------------------------------|------------|
| A. Biogeography/Historical                     |      |                                                                                                                                                                         |                |                                                                                                                                                                                                                                                                                                                                                                                                                    |            |
| 1. Domestication/Cultivation                   |      |                                                                                                                                                                         |                |                                                                                                                                                                                                                                                                                                                                                                                                                    |            |
| 1                                              | 1.01 | Has the taxon been the subject of domestication (or cultivation) for at least 20 generations?                                                                           | Yes            | Black carp, together with bighead carp, silver carp, and grass carp, make up the culturally important "four famous domestic fishes" used in polyculture in China for over a thousand years.                                                                                                                                                                                                                        | Very high  |
| 2                                              | 1.02 | Is the taxon harvested in the wild and likely to be sold or used in its live form?                                                                                      | Yes            | Captures indicate that black carp in the wild are much fewer in number than grass carp, silver carp, or bighead carp. Louisiana commercial fish-ers and fish market operators who are famil-iar with black carp report that the species has been taken consistently from the vicinity of the Red-Atchafalaya River system since the early 1990s (Nico & Jelks, 2011).                                              | Very high  |
| 3                                              | 1.03 | Does the taxon have invasive races, varieties, sub-taxa or congeners?                                                                                                   | Yes            | The presence of black carp within this enormous river system means that this highly invasive species has the accessibility to a vast range of bodies of water covering the majority of the Midwestern United States, so could establish populations in a                                                                                                                                                           | Very high  |
| 2. Climate, distribution and introduction risk |      |                                                                                                                                                                         |                |                                                                                                                                                                                                                                                                                                                                                                                                                    |            |
| 4                                              | 2.01 | How similar are the climatic conditions of the Risk Assessment (RA) area and the taxon's native range?                                                                  | Low            | World Map of the Köppen-Geiger climate classification.                                                                                                                                                                                                                                                                                                                                                             | Medium     |
| 5                                              | 2.02 | What is the quality of the climate matching data?                                                                                                                       | Low            | World Map of the Köppen-Geiger climate classification.                                                                                                                                                                                                                                                                                                                                                             | Medium     |
| 6                                              | 2.03 | Is the taxon already present outside of captivity in the RA area?                                                                                                       | No             | No such fact has been documented.                                                                                                                                                                                                                                                                                                                                                                                  | Very high  |
| 7                                              | 2.04 | How many potential vectors could the taxon use to enter in the RA area?                                                                                                 | One            | This species enters the region by humans intentionally.                                                                                                                                                                                                                                                                                                                                                            | Very high  |
| 8                                              | 2.05 | Is the taxon currently found in close proximity to, and likely to enter into, the RA area in the near future (e.g. unintentional and intentional introductions)?        | Yes            | In October 2000, a fish with body weight of 7500g and total lenght of 970mm was caught by a beach seine near Bandar Anzali coastal waters in the southern Caspian Sea, then in March 2001, a similar fish with 4800g weight and 800mm total lenght was caught by another beach seine in this area for the second time. These specimens were distinguished a commercial cyprinid species, Black carp (Abbasi 2003). | Very high  |
| 3. Invasive elsewhere                          |      |                                                                                                                                                                         |                |                                                                                                                                                                                                                                                                                                                                                                                                                    |            |
| 9                                              | 3.01 | Has the taxon become naturalised (established viable populations) outside its native range?                                                                             | Yes            | Froese and Pauly (2019) report that M. piceus is established outside its native range in Armenia, Bulgaria, Mexico, Vietnam, Turkmenistan, Uzbekistan, Romania, Japan, and Cuba, and probably established in Serbia and Montenegro (Skadar Lake) and                                                                                                                                                               | Very high  |
| 10                                             | 3.02 | In the taxon's introduced range, are there known adverse impacts to wild stocks or commercial taxa?                                                                     | Yes            | "There is high potential that the black carp would negatively impact native aquatic communities by feeding on, and reducing, populations of native mussels and snails, many of which are considered endangered or threatened (Nico et al. 2005).                                                                                                                                                                   | High       |
| 11                                             | 3.03 | In the taxon's introduced range, are there known adverse impacts to aquaculture?                                                                                        | No             | No such study has been conducted                                                                                                                                                                                                                                                                                                                                                                                   | Low        |
| 12                                             | 3.04 | In the taxon's introduced range, are there known adverse impacts to ecosystem                                                                                           | No             | No such study has been conducted                                                                                                                                                                                                                                                                                                                                                                                   | Low        |
| 13                                             | 3.05 | In the taxon's introduced range, are there known adverse socio-economic impacts?                                                                                        | No             | No such study has been conducted                                                                                                                                                                                                                                                                                                                                                                                   | Low        |
| B. Biology/Ecology                             |      |                                                                                                                                                                         |                |                                                                                                                                                                                                                                                                                                                                                                                                                    |            |
| 4. Undesirable (or persistence) traits         |      |                                                                                                                                                                         |                |                                                                                                                                                                                                                                                                                                                                                                                                                    |            |
| 14                                             | 4.01 | Is it likely that the taxon will be poisonous or pose other risks to human health?                                                                                      | No             | This species does not pose a threat to humans.                                                                                                                                                                                                                                                                                                                                                                     | Very high  |
| 15                                             | 4.02 | Is it likely that the taxon will smother one or more native taxa (that are not threatened or protected)?                                                                | Yes            | In the taxons introduction range such a fact is to be expected. Black carp presumed to negatively impact native aquatic communities by feeding on, and reducing, populations of native                                                                                                                                                                                                                             | High       |
| 16                                             | 4.03 | Are there any threatened or protected taxa that the non-native taxon would parasitise in the RA area?                                                                   | Yes            | There are meny threatened and protected species in the SC region (Acipenser spp, Salmo spp, Luciobarbus capito, etc) and such a fact is to be expected.                                                                                                                                                                                                                                                            | Very high  |
| 17                                             | 4.04 | Is the taxon adaptable in terms of climatic and other environmental conditions, thus enhancing its potential persistence if it has invaded or could invade the RA area? | Yes            | This species is already exist in Armenia and presumably it has the ability to adapt to the local climate.                                                                                                                                                                                                                                                                                                          | High       |
| 18                                             | 4.05 | Is the taxon likely to disrupt food-web structure/function in aquatic ecosystems if it has invaded or is likely to invade the RA                                        | Yes            | This is likely to happen if the species is widespread in the region.                                                                                                                                                                                                                                                                                                                                               | Medium     |
| 19                                             | 4.06 | Is the taxon likely to exert adverse impacts on ecosystem services in the RA area?                                                                                      | Yes            | This is likely to happen if the species is widespread in the region.                                                                                                                                                                                                                                                                                                                                               | Low        |
| 20                                             | 4.07 | Is it likely that the taxon will host, and/or act as a vector for, recognised pests and infectious agents that are endemic in the RA                                    | Not applicable | Data deficient                                                                                                                                                                                                                                                                                                                                                                                                     | Low        |

|                                 |      |                                                                                                                                                                              |                |                                                                                                                                                                                                                                                                                                                              |           |
|---------------------------------|------|------------------------------------------------------------------------------------------------------------------------------------------------------------------------------|----------------|------------------------------------------------------------------------------------------------------------------------------------------------------------------------------------------------------------------------------------------------------------------------------------------------------------------------------|-----------|
| 21                              | 4.08 | Is it likely that the taxon will host, and/or act as a vector for, recognised pests and infectious agents that are absent from (novel to) the RA area?                       | Yes            | M. piceus are hosts to parasites, flukes, bacterial and viral diseases. It could possibly transfer these to other fish species. It serves as intermediate host for human parasites (e.g. schistosoma), or parasites relevant to fish culture, such as the yellow and white grubs in channel catfish and stripe bass farming. | Medium    |
| 22                              | 4.09 | Is it likely that the taxon will achieve a body size that will make it more likely to be released from captivity?                                                            | Yes            | It is widely cultivated for food and Chinese medicine. One of the largest cyprinids in the world, the black carp can reach up to 1.9 m in length and 109 kg in weight.                                                                                                                                                       | Very high |
| 23                              | 4.10 | Is the taxon capable of sustaining itself in a range of water velocity conditions (e.g. versatile in habitat use)?                                                           | Yes            | Adults inhabit large lowland rivers and lakes, preferably with clear water and high oxygen concentrations.                                                                                                                                                                                                                   | High      |
| 24                              | 4.11 | Is it likely that the taxon's mode of existence (e.g. excretion of by-products) or behaviours (e.g. feeding) will reduce habitat quality for native taxa?                    | Yes            | Reduced populations of mussels caused by black carp predation could result in degraded water quality, reduced recreational harvest of fish, and decreased mussel shell revenue.                                                                                                                                              | Very high |
| 25                              | 4.12 | Is the taxon likely to maintain a viable population even when present in low densities (or persisting in adverse conditions by way of a dormant form)?                       | Yes            | Data deficient                                                                                                                                                                                                                                                                                                               | Medium    |
| <b>5. Resource exploitation</b> |      |                                                                                                                                                                              |                |                                                                                                                                                                                                                                                                                                                              |           |
| 26                              | 5.01 | Is the taxon likely to consume threatened or protected native taxa in the RA area?                                                                                           | Yes            | This is likely to happen if the species is widespread in the region.                                                                                                                                                                                                                                                         | Medium    |
| 27                              | 5.02 | Is the taxon likely to sequester food resources (including nutrients) to the detriment of native taxa in the RA area?                                                        | Yes            | This is likely to happen if the species is widespread in the region.                                                                                                                                                                                                                                                         | Medium    |
| <b>6. Reproduction</b>          |      |                                                                                                                                                                              |                |                                                                                                                                                                                                                                                                                                                              |           |
| 28                              | 6.01 | Is the taxon likely to exhibit parental care and/or to reduce age-at-maturity in response to environmental conditions?                                                       | No             | Because black carp produce semipelagic eggs and spawn in open rivers, it can be concluded that they do not tend their eggs and that there is no parental care (Nico and Williams 1996).                                                                                                                                      | Very high |
| 29                              | 6.02 | Is the taxon likely to produce viable gametes or propagules (in the RA area)?                                                                                                | No             | No such fact has been detected                                                                                                                                                                                                                                                                                               | Medium    |
| 30                              | 6.03 | Is the taxon likely to hybridise naturally with native taxa?                                                                                                                 | No             | Such a fact is not known                                                                                                                                                                                                                                                                                                     | Low       |
| 31                              | 6.04 | Is the taxon likely to be hermaphroditic or to display asexual reproduction?                                                                                                 | No             | Such a fact is not known                                                                                                                                                                                                                                                                                                     | Medium    |
| 32                              | 6.05 | Is the taxon dependent on the presence of another taxon (or specific habitat features) to complete its life cycle?                                                           | No             | Such a fact is not known                                                                                                                                                                                                                                                                                                     | High      |
| 33                              | 6.06 | Is the taxon known (or likely) to produce a large number of propagules or offspring within a short time span (e.g. < 1 year)?                                                | Yes            | Average fecundity is about 600 000 eggs.                                                                                                                                                                                                                                                                                     | Medium    |
| 34                              | 6.07 | How many time units (days, months, years) does the taxon require to reach the age-at-first-reproduction?                                                                     | 7              | Black carp mature at the age of 7 to 9 years in subtropics (e.g. Egypt) which is 3 to 5 years earlier than in China.                                                                                                                                                                                                         | Very high |
| <b>7. Dispersal mechanisms</b>  |      |                                                                                                                                                                              |                |                                                                                                                                                                                                                                                                                                                              |           |
| 35                              | 7.01 | How many potential internal vectors/pathways could the taxon use to disperse within the RA area (with suitable vectors/pathways)?                                            | One            | Most likely this species will be spread by humans.                                                                                                                                                                                                                                                                           | Very high |
| 36                              | 7.02 | Will any of these vectors/pathways bring the taxon in close proximity to one or more protected areas (e.g. MCZ, MPA, SSSI)?                                                  | Yes            | This is likely if the species is widespread in the region.                                                                                                                                                                                                                                                                   | Medium    |
| 37                              | 7.03 | Does the taxon have a means of actively attaching itself to hard substrata (e.g. ship hulls, pilings, buoys) such that it enhances the likelihood of dispersal?              | No             | This species does not have such means.                                                                                                                                                                                                                                                                                       | High      |
| 38                              | 7.04 | Is natural dispersal of the taxon likely to occur as eggs (for animals) or as propagules (for plants: seeds, spores) in the RA area?                                         | No             | Currently this species does not reproduces in the SC region.                                                                                                                                                                                                                                                                 | High      |
| 39                              | 7.05 | Is natural dispersal of the taxon likely to occur as larvae/juveniles (for animals) or as fragments/seedlings (for plants) in the RA area?                                   | No             | Currently this species does not reproduces in the SC region.                                                                                                                                                                                                                                                                 | High      |
| 40                              | 7.06 | Are older life stages of the taxon likely to migrate in the RA area for reproduction?                                                                                        | No             | Currently this species does not reproduces in the SC region.                                                                                                                                                                                                                                                                 | High      |
| 41                              | 7.07 | Are propagules or eggs of the taxon likely to be dispersed in the RA area by other animals?                                                                                  | No             | Currently this species does not reproduces in the SC region and such a fact did not detected.                                                                                                                                                                                                                                | High      |
| 42                              | 7.08 | Is dispersal of the taxon along any of the vectors/pathways mentioned in the previous seven questions (35–41; i.e. both unintentional or intentional) likely to be           | Not applicable | Data deficient                                                                                                                                                                                                                                                                                                               | Low       |
| 43                              | 7.09 | Is dispersal of the taxon density dependent?                                                                                                                                 | Not applicable | Data deficient                                                                                                                                                                                                                                                                                                               | Low       |
| <b>8. Tolerance attributes</b>  |      |                                                                                                                                                                              |                |                                                                                                                                                                                                                                                                                                                              |           |
| 44                              | 8.01 | Is the taxon able to withstand being out of water for extended periods (e.g. minimum of one or more hours) at some stage of its life cycle?                                  | No             | No such fact has been described.                                                                                                                                                                                                                                                                                             | Very high |
| 45                              | 8.02 | Is the taxon tolerant of a wide range of water quality conditions relevant to that taxon? [In the Justification field, indicate the relevant water quality variable(s) being | Not applicable | Data deficient                                                                                                                                                                                                                                                                                                               | Low       |
| 46                              | 8.03 | Can the taxon be controlled or eradicated in the wild with chemical, biological, or other agents/means?                                                                      | Not applicable | Data deficient                                                                                                                                                                                                                                                                                                               | Low       |
| 47                              | 8.04 | Is the taxon likely to tolerate or benefit from environmental/human disturbance?                                                                                             | Yes            | This species has spread by humans in many regions.                                                                                                                                                                                                                                                                           | High      |

|                          |      |                                                                                                                                                              |          |                                                                                                                                                                                        |           |
|--------------------------|------|--------------------------------------------------------------------------------------------------------------------------------------------------------------|----------|----------------------------------------------------------------------------------------------------------------------------------------------------------------------------------------|-----------|
| 48                       | 8.05 | Is the taxon able to tolerate salinity levels that are higher or lower than those found in its usual environment?                                            | No       | M. piceus is freshwater fish and does not occurs in brackish or marine waters.                                                                                                         | High      |
| 49                       | 8.06 | Are there effective natural enemies (predators) of the taxon present in the RA area?                                                                         | Yes      | There are several potential predators distributed in the Caucasus region which can controll the M. piceus populations: Esox lucius, Sander lucioperca, Silurus glanis, Salmo spp, etc. | Very high |
| <b>C. Climate change</b> |      |                                                                                                                                                              |          |                                                                                                                                                                                        |           |
| <b>9. Climate change</b> |      |                                                                                                                                                              |          |                                                                                                                                                                                        |           |
| 50                       | 9.01 | Under the predicted future climatic conditions, are the risks of entry into the RA area posed by the taxon likely to increase, decrease or not change?       | Increase | Own judgement                                                                                                                                                                          | High      |
| 51                       | 9.02 | Under the predicted future climatic conditions, are the risks of establishment posed by the taxon likely to increase, decrease or not change?                | Increase | Own judgement                                                                                                                                                                          | High      |
| 52                       | 9.03 | Under the predicted future climatic conditions, are the risks of dispersal within the RA area posed by the taxon likely to increase, decrease or not change? | Increase | Own judgement                                                                                                                                                                          | High      |
| 53                       | 9.04 | Under the predicted future climatic conditions, what is the likely magnitude of future potential impacts on biodiversity and/or ecological integrity/status? | Higher   | Own judgement                                                                                                                                                                          | High      |
| 54                       | 9.05 | Under the predicted future climatic conditions, what is the likely magnitude of future potential impacts on ecosystem structure and/or function?             | Higher   | Own judgement                                                                                                                                                                          | Medium    |
| 55                       | 9.06 | Under the predicted future climatic conditions, what is the likely magnitude of future potential impacts on ecosystem services/socio-economic factors?       | Higher   | Own judgement                                                                                                                                                                          | Medium    |

| Statistics                                     |             |
|------------------------------------------------|-------------|
| Scores                                         |             |
| <b>BRA</b>                                     | <b>22.0</b> |
| <b>BRA Outcome</b>                             | <b>-</b>    |
| <b>BRA+CCA</b>                                 | <b>34.0</b> |
| <b>BRA+CCA Outcome</b>                         | <b>-</b>    |
| Score partition                                |             |
| <b>A. Biogeography/Historical</b>              | <b>10.0</b> |
| 1. Domestication/Cultivation                   | 4.0         |
| 2. Climate, distribution and introduction risk | 0.0         |
| 3. Invasive elsewhere                          | 6.0         |
| <b>B. Biology/Ecology</b>                      | <b>12.0</b> |
| 4. Undesirable (or persistence) traits         | 10.0        |
| 5. Resource exploitation                       | 7.0         |
| 6. Reproduction                                | -1.0        |
| 7. Dispersal mechanisms                        | -4.0        |
| 8. Tolerance attributes                        | 0.0         |
| <b>C. Climate change</b>                       | <b>12.0</b> |
| 9. Climate change                              | 12.0        |
| Answered Questions                             |             |
| <b>Total</b>                                   | <b>55</b>   |
| <b>A. Biogeography/Historical</b>              | <b>13</b>   |
| 1. Domestication/Cultivation                   | 3           |
| 2. Climate, distribution and introduction risk | 5           |
| 3. Invasive elsewhere                          | 5           |
| <b>B. Biology/Ecology</b>                      | <b>36</b>   |
| 4. Undesirable (or persistence) traits         | 12          |
| 5. Resource exploitation                       | 2           |
| 6. Reproduction                                | 7           |
| 7. Dispersal mechanisms                        | 9           |
| 8. Tolerance attributes                        | 6           |
| <b>C. Climate change</b>                       | <b>6</b>    |
| 9. Climate change                              | 6           |
| Sectors affected                               |             |
| <b>Commercial</b>                              | <b>9</b>    |
| <b>Environmental</b>                           | <b>13</b>   |
| <b>Species or population nuisance traits</b>   | <b>13</b>   |

| Thresholds     |             |
|----------------|-------------|
| <b>BRA</b>     | <b>-</b>    |
| <b>BRA+CCA</b> | <b>-</b>    |
| Confidence     |             |
| <b>BRA+CCA</b> | <b>0.67</b> |
| <b>BRA</b>     | <b>0.67</b> |
| <b>CCA</b>     | <b>0.67</b> |

| Date and Time       |  |
|---------------------|--|
| 13/05/2022 13:16:07 |  |

AS-ISK v2

| Taxon and Assessor details         |                                                                                                                               |
|------------------------------------|-------------------------------------------------------------------------------------------------------------------------------|
| Category                           | Fishes and Lampreys (freshwater)                                                                                              |
| Taxon name                         | <i>Mylopharyngodon piceus</i>                                                                                                 |
| Common name                        | black carp                                                                                                                    |
| Assessor                           | Tatia Kuljanishvili                                                                                                           |
| Risk screening context             |                                                                                                                               |
| Reason and socio-economic benefits | Introduced for aquaculture worldwide                                                                                          |
| Risk assessment area               | South Caucasus                                                                                                                |
| Taxonomy                           | Actinopteri (ray-finned fishes) > Cypriniformes (Carp) > Xenocypridae                                                         |
| Native range                       | the Amur River basin to southern China                                                                                        |
| Introduced range                   | Worldwide                                                                                                                     |
| URL                                | <a href="http://fishbase.org/summary/Mylopharyngodon-piceus.html">http://fishbase.org/summary/Mylopharyngodon-piceus.html</a> |

|                                                |      |                                                                                                                                                                         | Response | Justification (references and/or other information)                                                                                                                                                                                                                                                                                                                                                                                                                                                                                                                                                  | Confidence |
|------------------------------------------------|------|-------------------------------------------------------------------------------------------------------------------------------------------------------------------------|----------|------------------------------------------------------------------------------------------------------------------------------------------------------------------------------------------------------------------------------------------------------------------------------------------------------------------------------------------------------------------------------------------------------------------------------------------------------------------------------------------------------------------------------------------------------------------------------------------------------|------------|
| A. Biogeography/Historical                     |      |                                                                                                                                                                         |          |                                                                                                                                                                                                                                                                                                                                                                                                                                                                                                                                                                                                      |            |
| 1. Domestication/Cultivation                   |      |                                                                                                                                                                         |          |                                                                                                                                                                                                                                                                                                                                                                                                                                                                                                                                                                                                      |            |
| 1                                              | 1.01 | Has the taxon been the subject of domestication (or cultivation) for at least 20 generations?                                                                           | Yes      | It has been grown in aquaculture facilities more than 20 generations                                                                                                                                                                                                                                                                                                                                                                                                                                                                                                                                 | Very high  |
| 2                                              | 1.02 | Is the taxon harvested in the wild and likely to be sold or used in its live form?                                                                                      | Yes      | Yes. Taxon is harvested in wild and is sold in its live form                                                                                                                                                                                                                                                                                                                                                                                                                                                                                                                                         | Very high  |
| 3                                              | 1.03 | Does the taxon have invasive races, varieties, sub-taxa or congeners?                                                                                                   | Yes      | For example Hypophthalmichthys nobilis, H. molitrix and Ctenopharyngodon idella                                                                                                                                                                                                                                                                                                                                                                                                                                                                                                                      | High       |
| 2. Climate, distribution and introduction risk |      |                                                                                                                                                                         |          |                                                                                                                                                                                                                                                                                                                                                                                                                                                                                                                                                                                                      |            |
| 4                                              | 2.01 | How similar are the climatic conditions of the Risk Assessment (RA) area and the taxon's native range?                                                                  | High     | The climate is more or less similar out of 19 stations, 15 match at value 9 (out of 10).                                                                                                                                                                                                                                                                                                                                                                                                                                                                                                             | Medium     |
| 5                                              | 2.02 | What is the quality of the climate matching data?                                                                                                                       | Medium   | Climatch data is medium since there are not much station on the RA area                                                                                                                                                                                                                                                                                                                                                                                                                                                                                                                              | High       |
| 6                                              | 2.03 | Is the taxon already present outside of captivity in the RA area?                                                                                                       | No       | It was reported as an acclimatized species by (Pipoyan and Tigranyan, 1998 2002), but without giving any details of the species distribution in the wild (Levin and Rubenyan, 2010). Later, Pipoyan (2012) reported that this species was distributed in the Metsamor River drainage; however, due to discontinuation of artificial reproduction, it disappeared from the inland waters of Armenia (Pipoyan, 2012). Unless there is new evidence of this species being caught in the wild in Armenia, we believe that this species should be taken off the list of non-native species of Aquaculture | Medium     |
| 7                                              | 2.04 | How many potential vectors could the taxon use to enter in the RA area?                                                                                                 | One      |                                                                                                                                                                                                                                                                                                                                                                                                                                                                                                                                                                                                      | High       |
| 8                                              | 2.05 | Is the taxon currently found in close proximity to, and likely to enter into, the RA area in the near future (e.g. unintentional and intentional introductions)?        | Yes      | It is possible that it would enter the RA again in near future                                                                                                                                                                                                                                                                                                                                                                                                                                                                                                                                       | Very high  |
| 3. Invasive elsewhere                          |      |                                                                                                                                                                         |          |                                                                                                                                                                                                                                                                                                                                                                                                                                                                                                                                                                                                      |            |
| 9                                              | 3.01 | Has the taxon become naturalised (established viable populations) outside its native range?                                                                             | Yes      | Yes it has become naturalized outside its native area                                                                                                                                                                                                                                                                                                                                                                                                                                                                                                                                                | High       |
| 10                                             | 3.02 | In the taxon's introduced range, are there known adverse impacts to wild stocks or commercial taxa?                                                                     | Yes      | Negative impact include the predation on mollusc species. Larvae feeds on zooplankton, ostracods and some aquatic insects. therefore it might be in competition with wildstocks and commercial                                                                                                                                                                                                                                                                                                                                                                                                       | Medium     |
| 11                                             | 3.03 | In the taxon's introduced range, are there known adverse impacts to aquaculture?                                                                                        | Yes      | Negative impact include the predation on mollusc species. Larvae feeds on zooplankton, ostracods and some aquatic insects. therefore it might be in competition with wildstocks and commercial                                                                                                                                                                                                                                                                                                                                                                                                       | Medium     |
| 12                                             | 3.04 | In the taxon's introduced range, are there known adverse impacts to ecosystem?                                                                                          | No       | No information available                                                                                                                                                                                                                                                                                                                                                                                                                                                                                                                                                                             | Medium     |
| 13                                             | 3.05 | In the taxon's introduced range, are there known adverse socio-economic impacts?                                                                                        | No       | No information available                                                                                                                                                                                                                                                                                                                                                                                                                                                                                                                                                                             | Medium     |
| B. Biology/Ecology                             |      |                                                                                                                                                                         |          |                                                                                                                                                                                                                                                                                                                                                                                                                                                                                                                                                                                                      |            |
| 4. Undesirable (or persistence) traits         |      |                                                                                                                                                                         |          |                                                                                                                                                                                                                                                                                                                                                                                                                                                                                                                                                                                                      |            |
| 14                                             | 4.01 | Is it likely that the taxon will be poisonous or pose other risks to human health?                                                                                      | No       | Not poisonous                                                                                                                                                                                                                                                                                                                                                                                                                                                                                                                                                                                        | Very high  |
| 15                                             | 4.02 | Is it likely that the taxon will smother one or more native taxa (that are not threatened or protected)?                                                                | Yes      | Since this species is mainly consuming molluscs many native freshwater mussels (order Unionoida) and snails in North America are already critically endangered (Lysne et al. 2008; Haag 2009; Burkhead 2012), the presence of Black Carp in USA rivers and streams is recognised as a major concern (Nico et al. 2005).                                                                                                                                                                                                                                                                              | Very high  |
| 16                                             | 4.03 | Are there any threatened or protected taxa that the non-native taxon would parasitise in the RA area?                                                                   | No       | Does not parasitise                                                                                                                                                                                                                                                                                                                                                                                                                                                                                                                                                                                  | Very high  |
| 17                                             | 4.04 | Is the taxon adaptable in terms of climatic and other environmental conditions, thus enhancing its potential persistence if it has invaded or could invade the RA area? | No       | No it is not much adaptable in terms of climatic and other environmental conditions. Thus their potential persistence if it has invaded is less.                                                                                                                                                                                                                                                                                                                                                                                                                                                     | Medium     |
| 18                                             | 4.05 | Is the taxon likely to disrupt food-web structure/function in aquatic ecosystems if it has invaded or is likely to invade the RA area?                                  | Yes      | It is possible                                                                                                                                                                                                                                                                                                                                                                                                                                                                                                                                                                                       | Medium     |
| 19                                             | 4.06 | Is the taxon likely to exert adverse impacts on ecosystem services in the RA area?                                                                                      | No       | No it is less likely                                                                                                                                                                                                                                                                                                                                                                                                                                                                                                                                                                                 | Medium     |
| 20                                             | 4.07 | Is it likely that the taxon will host, and/or act as a vector for, recognised pests and infectious agents that are endemic in the RA area?                              | Yes      | Possible, but not documented                                                                                                                                                                                                                                                                                                                                                                                                                                                                                                                                                                         | Medium     |



|                                 |      |                                                                                                                                                                              |     |                                                                                                                                                                                                                                                                                                                          |           |
|---------------------------------|------|------------------------------------------------------------------------------------------------------------------------------------------------------------------------------|-----|--------------------------------------------------------------------------------------------------------------------------------------------------------------------------------------------------------------------------------------------------------------------------------------------------------------------------|-----------|
| 21                              | 4.08 | Is it likely that the taxon will host, and/or act as a vector for, recognised pests and infectious agents that are absent from (novel to) the RA area?                       | Yes | It is possible. However, it is not documented.                                                                                                                                                                                                                                                                           | Medium    |
| 22                              | 4.09 | Is it likely that the taxon will achieve a body size that will make it more likely to be released from captivity?                                                            | Yes | Yes. See: <a href="http://fishbase.org/summary/Mylopharyngodon-piceus.html">http://fishbase.org/summary/Mylopharyngodon-piceus.html</a>                                                                                                                                                                                  | Very high |
| 23                              | 4.10 | Is the taxon capable of sustaining itself in a range of water velocity conditions (e.g. versatile in habitat use)?                                                           | Yes | Undertake upriver migration and spawns in open waters. Deposit pelagic or semipelagic eggs which hatch while drifting downstream. Larvae settle into floodplain lakes and channels with                                                                                                                                  | High      |
| 24                              | 4.11 | Is it likely that the taxon's mode of existence (e.g. excretion of by-products) or behaviours (e.g. feeding) will reduce habitat quality for native taxa?                    | Yes | they grow very fast and can form dense populations, they are versatile in terms of feeding and this can often lead to habitat alterations and disruption of food webs and nutrient cycles in new invaded ecosystems (Milstein et al. 1988; Cooke et al. 2009; Gozlan et al. 2010; Ma et al. 2010; Rosemberg et al. 2010) | Medium    |
| 25                              | 4.12 | Is the taxon likely to maintain a viable population even when present in low densities (or persisting in adverse conditions by way of a dormant form)?                       | Yes | depending on the water and weather conditions                                                                                                                                                                                                                                                                            | Medium    |
| <b>5. Resource exploitation</b> |      |                                                                                                                                                                              |     |                                                                                                                                                                                                                                                                                                                          |           |
| 26                              | 5.01 | Is the taxon likely to consume threatened or protected native taxa in the RA area?                                                                                           | Yes | It is possible, but not known                                                                                                                                                                                                                                                                                            | Low       |
| 27                              | 5.02 | Is the taxon likely to sequester food resources (including nutrients) to the detriment of native taxa in the RA area?                                                        | Yes | It is possible however not documented                                                                                                                                                                                                                                                                                    | Low       |
| <b>6. Reproduction</b>          |      |                                                                                                                                                                              |     |                                                                                                                                                                                                                                                                                                                          |           |
| 28                              | 6.01 | Is the taxon likely to exhibit parental care and/or to reduce age-at-maturity in response to environmental conditions?                                                       | No  | Not known                                                                                                                                                                                                                                                                                                                | High      |
| 29                              | 6.02 | Is the taxon likely to produce viable gametes or propagules (in the RA area)?                                                                                                | No  | No. climate is different.                                                                                                                                                                                                                                                                                                | Very high |
| 30                              | 6.03 | Is the taxon likely to hybridise naturally with native taxa?                                                                                                                 | No  | No information available                                                                                                                                                                                                                                                                                                 | Very high |
| 31                              | 6.04 | Is the taxon likely to be hermaphroditic or to display asexual reproduction?                                                                                                 | No  | No. Does not display asexual reproduction                                                                                                                                                                                                                                                                                | High      |
| 32                              | 6.05 | Is the taxon dependent on the presence of another taxon (or specific habitat features) to complete its life cycle?                                                           | No  | No. See: <a href="http://fishbase.org/summary/Mylopharyngodon-piceus.html">http://fishbase.org/summary/Mylopharyngodon-piceus.html</a>                                                                                                                                                                                   | Very high |
| 33                              | 6.06 | Is the taxon known (or likely) to produce a large number of propagules or offspring within a short time span (e.g. < 1 year)?                                                | Yes | Yes See: <a href="http://fishbase.org/summary/Mylopharyngodon-piceus.html">http://fishbase.org/summary/Mylopharyngodon-piceus.html</a>                                                                                                                                                                                   | Very high |
| 34                              | 6.07 | How many time units (days, months, years) does the taxon require to reach the age-at-first-reproduction?                                                                     | 7   | 6-11 years for male, and for females even later,                                                                                                                                                                                                                                                                         | Very high |
| <b>7. Dispersal mechanisms</b>  |      |                                                                                                                                                                              |     |                                                                                                                                                                                                                                                                                                                          |           |
| 35                              | 7.01 | How many potential internal vectors/pathways could the taxon use to disperse within the RA area (with suitable                                                               | One | Aquaculture                                                                                                                                                                                                                                                                                                              | Very high |
| 36                              | 7.02 | Will any of these vectors/pathways bring the taxon in close proximity to one or more protected areas (e.g. MCZ, MPA, SSSI)?                                                  | Yes | Yes it is possible                                                                                                                                                                                                                                                                                                       | High      |
| 37                              | 7.03 | Does the taxon have a means of actively attaching itself to hard substrata (e.g. ship hulls, pilings, buoys) such that it enhances the likelihood of dispersal?              | No  | No. Morphologically this species does not have a means of actively attaching itself to hard substrata                                                                                                                                                                                                                    | Very high |
| 38                              | 7.04 | Is natural dispersal of the taxon likely to occur as eggs (for animals) or as propagules (for plants: seeds, spores) in the RA area?                                         | No  | No. Because does not reproduce in RA                                                                                                                                                                                                                                                                                     | Very high |
| 39                              | 7.05 | Is natural dispersal of the taxon likely to occur as larvae/juveniles (for animals) or as fragments/seedlings (for plants) in the RA area?                                   | No  | They do not produce viable gametes and therefore can be distributed by larvae, or juveniles.                                                                                                                                                                                                                             | Very high |
| 40                              | 7.06 | Are older life stages of the taxon likely to migrate in the RA area for reproduction?                                                                                        | No  | Do not reproduce therefore, does not migrate.                                                                                                                                                                                                                                                                            | Very high |
| 41                              | 7.07 | Are propagules or eggs of the taxon likely to be dispersed in the RA area by other animals?                                                                                  | No  | No. Can not be dispersed by other animals                                                                                                                                                                                                                                                                                | Very high |
| 42                              | 7.08 | Is dispersal of the taxon along any of the vectors/pathways mentioned in the previous seven questions (35-41; i.e. both unintentional or intentional) likely to be           | No  | Not rapid                                                                                                                                                                                                                                                                                                                | Very high |
| 43                              | 7.09 | Is dispersal of the taxon density dependent?                                                                                                                                 | Yes | It is possible                                                                                                                                                                                                                                                                                                           | Medium    |
| <b>8. Tolerance attributes</b>  |      |                                                                                                                                                                              |     |                                                                                                                                                                                                                                                                                                                          |           |
| 44                              | 8.01 | Is the taxon able to withstand being out of water for extended periods (e.g. minimum of one or more hours) at some stage of its life cycle?                                  | No  | No info                                                                                                                                                                                                                                                                                                                  | Low       |
| 45                              | 8.02 | Is the taxon tolerant of a wide range of water quality conditions relevant to that taxon? [In the Justification field, indicate the relevant water quality variable(s) being | No  | No it is not tolerant of a wide range of water quality conditions.                                                                                                                                                                                                                                                       | Very high |
| 46                              | 8.03 | Can the taxon be controlled or eradicated in the wild with chemical, biological, or other agents/means?                                                                      | Yes | It is possible                                                                                                                                                                                                                                                                                                           | Very high |
| 47                              | 8.04 | Is the taxon likely to tolerate or benefit from environmental/human disturbance?                                                                                             | No  | No information. probably not.                                                                                                                                                                                                                                                                                            | Low       |

|                          |      |                                                                                                                                                              |           |                                                                                                                                                                                                                                                      |           |
|--------------------------|------|--------------------------------------------------------------------------------------------------------------------------------------------------------------|-----------|------------------------------------------------------------------------------------------------------------------------------------------------------------------------------------------------------------------------------------------------------|-----------|
| 48                       | 8.05 | Is the taxon able to tolerate salinity levels that are higher or lower than those found in its usual environment?                                            | No        | No information available                                                                                                                                                                                                                             | Very high |
| 49                       | 8.06 | Are there effective natural enemies (predators) of the taxon present in the RA                                                                               | No        | No information available                                                                                                                                                                                                                             | Very high |
| <b>C. Climate change</b> |      |                                                                                                                                                              |           |                                                                                                                                                                                                                                                      |           |
| <b>9. Climate change</b> |      |                                                                                                                                                              |           |                                                                                                                                                                                                                                                      |           |
| 50                       | 9.01 | Under the predicted future climatic conditions, are the risks of entry into the RA area posed by the taxon likely to increase, decrease or not change?       | Increase  | It was hypothesized that climate change might alert the mechanisms of transportation and introduction of non-native species. Commercial and recreational activities will increase, that itself increases the propagule pressure levels of non-native | Very high |
| 51                       | 9.02 | Under the predicted future climatic conditions, are the risks of establishment posed by the taxon likely to increase, decrease or not change?                | Increase  | It is possible to increase, however it needs more documentation                                                                                                                                                                                      | Low       |
| 52                       | 9.03 | Under the predicted future climatic conditions, are the risks of dispersal within the RA area posed by the taxon likely to increase, decrease or not change? | Increase  | Can increase, but difficult to assume now.                                                                                                                                                                                                           | Low       |
| 53                       | 9.04 | Under the predicted future climatic conditions, what is the likely magnitude of future potential impacts on biodiversity and/or ecological integrity/status? | Higher    | It could be higher                                                                                                                                                                                                                                   | Medium    |
| 54                       | 9.05 | Under the predicted future climatic conditions, what is the likely magnitude of future potential impacts on ecosystem structure and/or function?             | No change | No change                                                                                                                                                                                                                                            | Low       |
| 55                       | 9.06 | Under the predicted future climatic conditions, what is the likely magnitude of future potential impacts on ecosystem services/socio-economic factors?       | No change | No change                                                                                                                                                                                                                                            | Low       |

| Statistics                                     |             |
|------------------------------------------------|-------------|
| Scores                                         |             |
| <b>BRA</b>                                     | <b>20.0</b> |
| <b>BRA Outcome</b>                             | <b>-</b>    |
| <b>BRA+CCA</b>                                 | <b>28.0</b> |
| <b>BRA+CCA Outcome</b>                         | <b>-</b>    |
| Score partition                                |             |
| <b>A. Biogeography/Historical</b>              | <b>14.0</b> |
| 1. Domestication/Cultivation                   | 4.0         |
| 2. Climate, distribution and introduction risk | 0.0         |
| 3. Invasive elsewhere                          | 10.0        |
| <b>B. Biology/Ecology</b>                      | <b>6.0</b>  |
| 4. Undesirable (or persistence) traits         | 7.0         |
| 5. Resource exploitation                       | 7.0         |
| 6. Reproduction                                | -1.0        |
| 7. Dispersal mechanisms                        | -3.0        |
| 8. Tolerance attributes                        | -4.0        |
| <b>C. Climate change</b>                       | <b>8.0</b>  |
| 9. Climate change                              | 8.0         |
| Answered Questions                             |             |
| <b>Total</b>                                   | <b>55</b>   |
| <b>A. Biogeography/Historical</b>              | <b>13</b>   |
| 1. Domestication/Cultivation                   | 3           |
| 2. Climate, distribution and introduction risk | 5           |
| 3. Invasive elsewhere                          | 5           |
| <b>B. Biology/Ecology</b>                      | <b>36</b>   |
| 4. Undesirable (or persistence) traits         | 12          |
| 5. Resource exploitation                       | 2           |
| 6. Reproduction                                | 7           |
| 7. Dispersal mechanisms                        | 9           |
| 8. Tolerance attributes                        | 6           |
| <b>C. Climate change</b>                       | <b>6</b>    |
| 9. Climate change                              | 6           |
| Sectors affected                               |             |
| <b>Commercial</b>                              | <b>11</b>   |
| <b>Environmental</b>                           | <b>10</b>   |
| <b>Species or population nuisance traits</b>   | <b>8</b>    |

| Thresholds     |             |
|----------------|-------------|
| <b>BRA</b>     | <b>-</b>    |
| <b>BRA+CCA</b> | <b>-</b>    |
| Confidence     |             |
| <b>BRA+CCA</b> | <b>0.72</b> |
| <b>BRA</b>     | <b>0.76</b> |
| <b>CCA</b>     | <b>0.42</b> |

| Date and Time       |
|---------------------|
| 21/05/2022 15:04:43 |

## AS-ISK v2

| Taxon and Assessor details         |                                                                                                                                   |
|------------------------------------|-----------------------------------------------------------------------------------------------------------------------------------|
| Category                           | Fishes and Lampreys (freshwater)                                                                                                  |
| Taxon name                         | <i>Oncorhynchus kisutch</i>                                                                                                       |
| Common name                        | coho salmon                                                                                                                       |
| Assessor                           | Bella Japoshvili                                                                                                                  |
| Risk screening context             |                                                                                                                                   |
| Reason and socio-economic benefits | The species was introduced in Azerbaijan in the past and released in the Caspian sea. Is an                                       |
| Risk assessment area               | South Caucasus                                                                                                                    |
| Taxonomy                           | Actinopteri (ray-finned fishes) > Salmoniformes (Salmons) > Salmonidae (Salmonids)                                                |
| Native range                       | Atlantic                                                                                                                          |
| Introduced range                   | Europe and Former USSR regions                                                                                                    |
| URL                                | <a href="https://www.fishbase.de/summary/Oncorhynchus-kisutch.html">https://www.fishbase.de/summary/Oncorhynchus-kisutch.html</a> |

|                                                |      |                                                                                                                                                                         | Response | Justification (references and/or other information)                                                                                                                                      | Confidence |
|------------------------------------------------|------|-------------------------------------------------------------------------------------------------------------------------------------------------------------------------|----------|------------------------------------------------------------------------------------------------------------------------------------------------------------------------------------------|------------|
| A. Biogeography/Historical                     |      |                                                                                                                                                                         |          |                                                                                                                                                                                          |            |
| 1. Domestication/Cultivation                   |      |                                                                                                                                                                         |          |                                                                                                                                                                                          |            |
| 1                                              | 1.01 | Has the taxon been the subject of domestication (or cultivation) for at least 20 generations?                                                                           | Yes      | Fleming, I. A., & Gross, M. R. (1993). Breeding success of hatchery and wild coho salmon ( <i>Oncorhynchus kisutch</i> ) in competition. <i>Ecological applications</i> , 3(2), 230-245. | Very high  |
| 2                                              | 1.02 | Is the taxon harvested in the wild and likely to be sold or used in its live form?                                                                                      | No       | Not expected because salmonids are usually sold as live forms from the aquaculture                                                                                                       | Medium     |
| 3                                              | 1.03 | Does the taxon have invasive races, varieties, sub-taxa or congeners?                                                                                                   | Yes      | Congeners                                                                                                                                                                                | High       |
| 2. Climate, distribution and introduction risk |      |                                                                                                                                                                         |          |                                                                                                                                                                                          |            |
| 4                                              | 2.01 | How similar are the climatic conditions of the Risk Assessment (RA) area and the taxon's native range?                                                                  | Medium   | Results of climatch algorithm                                                                                                                                                            | Medium     |
| 5                                              | 2.02 | What is the quality of the climate matching data?                                                                                                                       | Low      | Due to low accuracy of local climate data                                                                                                                                                | High       |
| 6                                              | 2.03 | Is the taxon already present outside of captivity in the RA area?                                                                                                       | No       | No documented evidence                                                                                                                                                                   | Medium     |
| 7                                              | 2.04 | How many potential vectors could the taxon use to enter in the RA area?                                                                                                 | One      | Aquacultural purpose                                                                                                                                                                     | Medium     |
| 8                                              | 2.05 | Is the taxon currently found in close proximity to, and likely to enter into, the RA area in the near future (e.g. unintentional and intentional introductions)?        | No       | No records are available                                                                                                                                                                 | High       |
| 3. Invasive elsewhere                          |      |                                                                                                                                                                         |          |                                                                                                                                                                                          |            |
| 9                                              | 3.01 | Has the taxon become naturalised (established viable populations) outside its introduced range?                                                                         | Yes      | Many areas in US and Europe are reported from various literature                                                                                                                         | Very high  |
| 10                                             | 3.02 | In the taxon's introduced range, are there known adverse impacts to wild stocks or commercial taxa?                                                                     | No       | Data deficient, no such an evidence exists                                                                                                                                               | High       |
| 11                                             | 3.03 | In the taxon's introduced range, are there known adverse impacts to aquaculture?                                                                                        | No       | Not reported and not expected                                                                                                                                                            | High       |
| 12                                             | 3.04 | In the taxon's introduced range, are there known adverse impacts to ecosystem?                                                                                          | No       | Not reported and not expected                                                                                                                                                            | High       |
| 13                                             | 3.05 | In the taxon's introduced range, are there known adverse socio-economic impacts?                                                                                        | No       | Not reported and not expected                                                                                                                                                            | Medium     |
| B. Biology/Ecology                             |      |                                                                                                                                                                         |          |                                                                                                                                                                                          |            |
| 4. Undesirable (or persistence) traits         |      |                                                                                                                                                                         |          |                                                                                                                                                                                          |            |
| 14                                             | 4.01 | Is it likely that the taxon will be poisonous or pose other risks to human health?                                                                                      | No       | Not a harmful species                                                                                                                                                                    | Very high  |
| 15                                             | 4.02 | Is it likely that the taxon will smother one or more native taxa (that are not threatened or protected)?                                                                | No       | Not expected, based on professional judgement                                                                                                                                            | Low        |
| 16                                             | 4.03 | Are there any threatened or protected taxa that the non-native taxon would parasitise in the RA area?                                                                   | No       | Although species is predator, it mainly consumes the aquatic insects from which no threatened species are known from RA area                                                             | Very high  |
| 17                                             | 4.04 | Is the taxon adaptable in terms of climatic and other environmental conditions, thus enhancing its potential persistence if it has invaded or could invade the RA area? | No       | Not enough data is available, however salmonids are generally less adaptable to variable climate                                                                                         | High       |
| 18                                             | 4.05 | Is the taxon likely to disrupt food-web structure/function in aquatic ecosystems if it has invaded or is likely to invade the RA area?                                  | No       | Based on professional judgement                                                                                                                                                          | High       |
| 19                                             | 4.06 | Is the taxon likely to exert adverse impacts on ecosystem services in the RA area?                                                                                      | No       | Based on professional judgement                                                                                                                                                          | High       |
| 20                                             | 4.07 | Is it likely that the taxon will host, and/or act as a vector for, recognised pests and infectious agents that are endemic in the RA area?                              | No       | Based on professional judgement                                                                                                                                                          | High       |
| 21                                             | 4.08 | Is it likely that the taxon will host, and/or act as a vector for, recognised pests and infectious agents that are absent from (novel to) the RA area?                  | Yes      | Based on professional judgement                                                                                                                                                          | Medium     |
| 22                                             | 4.09 | Is it likely that the taxon will achieve a body size that will make it more likely to be released from captivity?                                                       | Yes      | Based on professional judgement                                                                                                                                                          | High       |
| 23                                             | 4.10 | Is the taxon capable of sustaining itself in a range of water velocity conditions (e.g. versatile in habitat use)?                                                      | Yes      | Living in a waters of wide ranging velocities                                                                                                                                            | Very high  |

|                                 |      |                                                                                                                                                                              |     |                                                                                                                                                                                              |           |
|---------------------------------|------|------------------------------------------------------------------------------------------------------------------------------------------------------------------------------|-----|----------------------------------------------------------------------------------------------------------------------------------------------------------------------------------------------|-----------|
| 24                              | 4.11 | Is it likely that the taxon's mode of existence (e.g. excretion of by-products) or behaviours (e.g. feeding) will reduce habitat quality for native taxa?                    | No  | Based on professional judgement                                                                                                                                                              | Medium    |
| 25                              | 4.12 | Is the taxon likely to maintain a viable population even when present in low densities (or persisting in adverse conditions by way of a dormant form)?                       | No  | Based on professional judgement                                                                                                                                                              | High      |
| <b>5. Resource exploitation</b> |      |                                                                                                                                                                              |     |                                                                                                                                                                                              |           |
| 26                              | 5.01 | Is the taxon likely to consume threatened or protected native taxa in the RA area?                                                                                           | No  | Based on professional judgement                                                                                                                                                              | Medium    |
| 27                              | 5.02 | Is the taxon likely to sequester food resources (including nutrients) to the detriment of native taxa in the RA area?                                                        | Yes | Can compete to native salmonids, supposed based on professional judgement                                                                                                                    | Medium    |
| <b>6. Reproduction</b>          |      |                                                                                                                                                                              |     |                                                                                                                                                                                              |           |
| 28                              | 6.01 | Is the taxon likely to exhibit parental care and/or to reduce age-at-maturity in response to environmental conditions?                                                       | Yes | Page, L.M. and B.M. Burr, 2011. A field guide to freshwater fishes of North America north of Mexico. Boston : Houghton Mifflin Harcourt, 663p.                                               | Very high |
| 29                              | 6.02 | Is the taxon likely to produce viable gametes or propagules (in the RA area)?                                                                                                | No  | Not documented evidence exists                                                                                                                                                               | Low       |
| 30                              | 6.03 | Is the taxon likely to hybridise naturally with native taxa?                                                                                                                 | Yes | Not documented evidence exists                                                                                                                                                               | Low       |
| 31                              | 6.04 | Is the taxon likely to be hermaphroditic or to display asexual reproduction?                                                                                                 | No  | Page, L.M. and B.M. Burr, 2011. A field guide to freshwater fishes of North America north of Mexico. Boston : Houghton Mifflin Harcourt, 663p.                                               | Very high |
| 32                              | 6.05 | Is the taxon dependent on the presence of another taxon (or specific habitat features) to complete its life cycle?                                                           | No  | Page, L.M. and B.M. Burr, 2011. A field guide to freshwater fishes of North America north of Mexico. Boston : Houghton Mifflin Harcourt, 663p.                                               | Very high |
| 33                              | 6.06 | Is the taxon known (or likely) to produce a large number of propagules or offspring within a short time span (e.g. < 1 year)?                                                | No  | Page, L.M. and B.M. Burr, 2011. A field guide to freshwater fishes of North America north of Mexico. Boston : Houghton Mifflin Harcourt, 663p.                                               | Medium    |
| 34                              | 6.07 | How many time units (days, months, years) does the taxon require to reach the age-at-first-reproduction?                                                                     | 2   | year                                                                                                                                                                                         | Medium    |
| <b>7. Dispersal mechanisms</b>  |      |                                                                                                                                                                              |     |                                                                                                                                                                                              |           |
| 35                              | 7.01 | How many potential internal vectors/pathways could the taxon use to disperse within the RA area (with suitable)                                                              | One | Intentional introduction, based on professional judgement                                                                                                                                    | High      |
| 36                              | 7.02 | Will any of these vectors/pathways bring the taxon in close proximity to one or more protected areas (e.g. MCZ, MPA, SSSI)?                                                  | No  | The species is basically expected to inhabit river parts that are not within such a protected areas in RA area                                                                               | Medium    |
| 37                              | 7.03 | Does the taxon have a means of actively attaching itself to hard substrata (e.g. ship hulls, pilings, buoys) such that it enhances the likelihood of dispersal?              | No  | Page, L.M. and B.M. Burr, 2011. A field guide to freshwater fishes of North America north of Mexico. Boston : Houghton Mifflin Harcourt, 663p.                                               | Very high |
| 38                              | 7.04 | Is natural dispersal of the taxon likely to occur as eggs (for animals) or as propagules (for plants: seeds, spores) in the RA area?                                         | No  | Not expected, based on professional judgment                                                                                                                                                 | Very high |
| 39                              | 7.05 | Is natural dispersal of the taxon likely to occur as larvae/juveniles (for animals) or as fragments/seedlings (for plants) in the RA area?                                   | Yes | This includes the escaped juveniles from captivity                                                                                                                                           | Medium    |
| 40                              | 7.06 | Are older life stages of the taxon likely to migrate in the RA area for reproduction?                                                                                        | No  | Not expected since no species have recorded from the RA area in wild                                                                                                                         | High      |
| 41                              | 7.07 | Are propagules or eggs of the taxon likely to be dispersed in the RA area by other animals?                                                                                  | No  | No such fact has ever been reported                                                                                                                                                          | Very high |
| 42                              | 7.08 | Is dispersal of the taxon along any of the vectors/pathways mentioned in the previous seven questions (35-41; i.e. both unintentional or intentional) likely to be           | Yes | Based on professional judgement                                                                                                                                                              | Medium    |
| 43                              | 7.09 | Is dispersal of the taxon density dependent?                                                                                                                                 | No  | No such observation exists. Page, L.M. and B.M. Burr, 2011. A field guide to freshwater fishes of North America north of Mexico. Boston : Houghton Mifflin Harcourt, 663p.                   | Very high |
| <b>8. Tolerance attributes</b>  |      |                                                                                                                                                                              |     |                                                                                                                                                                                              |           |
| 44                              | 8.01 | Is the taxon able to withstand being out of water for extended periods (e.g. minimum of one or more hours) at some stage of its life cycle?                                  | No  | Not a documented evidence exists, but salmonids are generally less tolerant out of water environment                                                                                         | Very high |
| 45                              | 8.02 | Is the taxon tolerant of a wide range of water quality conditions relevant to that taxon? [In the Justification field, indicate the relevant water quality variable(s) being | No  | -                                                                                                                                                                                            | High      |
| 46                              | 8.03 | Can the taxon be controlled or eradicated in the wild with chemical, biological, or other agents/means?                                                                      | Yes | Based on professional judgement                                                                                                                                                              | Low       |
| 47                              | 8.04 | Is the taxon likely to tolerate or benefit from environmental/human disturbance?                                                                                             | No  | Based on professional judgement                                                                                                                                                              | High      |
| 48                              | 8.05 | Is the taxon able to tolerate salinity levels that are higher or lower than those found in its usual environment?                                                            | No  | It naturally lives in marin and freshwaters (Page, L.M. and B.M. Burr, 2011. A field guide to freshwater fishes of North America north of Mexico. Boston : Houghton Mifflin Harcourt, 663p.) | Very high |
| 49                              | 8.06 | Are there effective natural enemies (predators) of the taxon present in the RA                                                                                               | No  | Not an effective natural enemy exists in RA area                                                                                                                                             | High      |
| <b>C. Climate change</b>        |      |                                                                                                                                                                              |     |                                                                                                                                                                                              |           |
| <b>9. Climate change</b>        |      |                                                                                                                                                                              |     |                                                                                                                                                                                              |           |

|    |      |                                                                                                                                                              |           |                                 |        |
|----|------|--------------------------------------------------------------------------------------------------------------------------------------------------------------|-----------|---------------------------------|--------|
| 50 | 9.01 | Under the predicted future climatic conditions, are the risks of entry into the RA area posed by the taxon likely to increase, decrease or not change?       | No change | Based on professional judgement | Medium |
| 51 | 9.02 | Under the predicted future climatic conditions, are the risks of establishment posed by the taxon likely to increase, decrease or not change?                | Increase  | Based on professional judgement | Medium |
| 52 | 9.03 | Under the predicted future climatic conditions, are the risks of dispersal within the RA area posed by the taxon likely to increase, decrease or not change? | Increase  | Based on professional judgement | Low    |
| 53 | 9.04 | Under the predicted future climatic conditions, what is the likely magnitude of future potential impacts on biodiversity and/or ecological integrity/status? | No change | Based on professional judgement | Medium |
| 54 | 9.05 | Under the predicted future climatic conditions, what is the likely magnitude of future potential impacts on ecosystem structure and/or function?             | No change | Based on professional judgement | Medium |
| 55 | 9.06 | Under the predicted future climatic conditions, what is the likely magnitude of future potential impacts on ecosystem services/socio-economic factors?       | No change | Based on professional judgement | Medium |

| Statistics                                     |            |
|------------------------------------------------|------------|
| Scores                                         |            |
| <b>BRA</b>                                     | <b>4.0</b> |
| <b>BRA Outcome</b>                             | <b>-</b>   |
| <b>BRA+CCA</b>                                 | <b>8.0</b> |
| <b>BRA+CCA Outcome</b>                         | <b>-</b>   |
| Score partition                                |            |
| <b>A. Biogeography/Historical</b>              | <b>4.0</b> |
| 1. Domestication/Cultivation                   | 2.0        |
| 2. Climate, distribution and introduction risk | 0.0        |
| 3. Invasive elsewhere                          | 2.0        |
| <b>B. Biology/Ecology</b>                      | <b>0.0</b> |
| 4. Undesirable (or persistence) traits         | 2.0        |
| 5. Resource exploitation                       | 2.0        |
| 6. Reproduction                                | 2.0        |
| 7. Dispersal mechanisms                        | -2.0       |
| 8. Tolerance attributes                        | -4.0       |
| <b>C. Climate change</b>                       | <b>4.0</b> |
| 9. Climate change                              | 4.0        |
| Answered Questions                             |            |
| <b>Total</b>                                   | <b>55</b>  |
| <b>A. Biogeography/Historical</b>              | <b>13</b>  |
| 1. Domestication/Cultivation                   | 3          |
| 2. Climate, distribution and introduction risk | 5          |
| 3. Invasive elsewhere                          | 5          |
| <b>B. Biology/Ecology</b>                      | <b>36</b>  |
| 4. Undesirable (or persistence) traits         | 12         |
| 5. Resource exploitation                       | 2          |
| 6. Reproduction                                | 7          |
| 7. Dispersal mechanisms                        | 9          |
| 8. Tolerance attributes                        | 6          |
| <b>C. Climate change</b>                       | <b>6</b>   |
| 9. Climate change                              | 6          |
| Sectors affected                               |            |
| <b>Commercial</b>                              | <b>2</b>   |
| <b>Environmental</b>                           | <b>0</b>   |
| <b>Species or population nuisance traits</b>   | <b>7</b>   |

| Thresholds     |             |
|----------------|-------------|
| <b>BRA</b>     | <b>-</b>    |
| <b>BRA+CCA</b> | <b>-</b>    |
| Confidence     |             |
| <b>BRA+CCA</b> | <b>0.68</b> |
| <b>BRA</b>     | <b>0.71</b> |
| <b>CCA</b>     | <b>0.46</b> |

| Date and Time       |  |
|---------------------|--|
| 16/05/2022 17:24:33 |  |

## AS-ISK v2

| Taxon and Assessor details         |                                                                                                    |
|------------------------------------|----------------------------------------------------------------------------------------------------|
| Category                           | Fishes and Lampreys (freshwater)                                                                   |
| Taxon name                         | <i>Oncorhynchus kisutch</i>                                                                        |
| Common name                        | coho salmon                                                                                        |
| Assessor                           | Giorgi Epitashvili                                                                                 |
| Risk screening context             |                                                                                                    |
| Reason and socio-economic benefits | In North America, coho salmon is a game fish in fresh and salt water from July to December,        |
| Risk assessment area               | South Caucasus                                                                                     |
| Taxonomy                           | <i>Oncorhynchus kisutch</i> (Walbaum, 1792)                                                        |
| Native range                       | North Pacific: distributed from the Anadyr River in Russia south towards Hokkaido, Japan, and from |
| Introduced range                   | Introduced into northern rivers of France; in 1973 and 1974, 50,000 yearlings escaped into the     |
| URL                                | <a href="https://www.fishbase.se/summary/245">https://www.fishbase.se/summary/245</a>              |

|                                                |      |                                                                                                                                                                         | Response       | Justification (references and/or other information)                                                                                                                                                                                                                                                                                                                                                                                            | Confidence |
|------------------------------------------------|------|-------------------------------------------------------------------------------------------------------------------------------------------------------------------------|----------------|------------------------------------------------------------------------------------------------------------------------------------------------------------------------------------------------------------------------------------------------------------------------------------------------------------------------------------------------------------------------------------------------------------------------------------------------|------------|
| A. Biogeography/Historical                     |      |                                                                                                                                                                         |                |                                                                                                                                                                                                                                                                                                                                                                                                                                                |            |
| 1. Domestication/Cultivation                   |      |                                                                                                                                                                         |                |                                                                                                                                                                                                                                                                                                                                                                                                                                                |            |
| 1                                              | 1.01 | Has the taxon been the subject of domestication (or cultivation) for at least 20 generations?                                                                           | Yes            | The coho salmon stocks presently used in aquaculture were derived from government hatchery programmes in the United States of America and Canada, but most countries now rely on local sources. Self-sustaining stocks have been reported in the Great Lakes of America and in Chile, where they are a major species in a rapidly expanding aquaculture industry.                                                                              | Very high  |
| 2                                              | 1.02 | Is the taxon harvested in the wild and likely to be sold or used in its live form?                                                                                      | Yes            | Self-sustaining stocks of <i>O. kisutch</i> have been reported in the Great Lakes of America and in Chile, where they are a major species in a rapidly expanding aquaculture industry.                                                                                                                                                                                                                                                         | Very high  |
| 3                                              | 1.03 | Does the taxon have invasive races, varieties, sub-taxa or congeners?                                                                                                   | Yes            | Within this genus, one of the most widespread and invasive species is <i>O. mykiss</i> . <i>O. mykiss</i> is listed as one of the world's 100 worst invasive species by the ISSG (2021).                                                                                                                                                                                                                                                       | Very high  |
| 2. Climate, distribution and introduction risk |      |                                                                                                                                                                         |                |                                                                                                                                                                                                                                                                                                                                                                                                                                                |            |
| 4                                              | 2.01 | How similar are the climatic conditions of the Risk Assessment (RA) area and the taxon's native range?                                                                  | Medium         | WORLD MAP OF THE KÖPPEN-GEIGER CLIMATE CLASSIFICATION                                                                                                                                                                                                                                                                                                                                                                                          | Medium     |
| 5                                              | 2.02 | What is the quality of the climate matching data?                                                                                                                       | Medium         | WORLD MAP OF THE KÖPPEN-GEIGER CLIMATE CLASSIFICATION                                                                                                                                                                                                                                                                                                                                                                                          | Medium     |
| 6                                              | 2.03 | Is the taxon already present outside of captivity in the RA area?                                                                                                       | No             | No such fact has been detected                                                                                                                                                                                                                                                                                                                                                                                                                 | Medium     |
| 7                                              | 2.04 | How many potential vectors could the taxon use to enter in the RA area?                                                                                                 | One            | This species enters in the region for aquaculture purposes                                                                                                                                                                                                                                                                                                                                                                                     | Medium     |
| 8                                              | 2.05 | Is the taxon currently found in close proximity to, and likely to enter into, the RA area in the near future (e.g. unintentional and intentional introductions)?        | Yes            | <i>Oncorhynchus kisutch</i> introduced to Iran and probably established in the wild.                                                                                                                                                                                                                                                                                                                                                           | Very high  |
| 3. Invasive elsewhere                          |      |                                                                                                                                                                         |                |                                                                                                                                                                                                                                                                                                                                                                                                                                                |            |
| 9                                              | 3.01 | Has the taxon become naturalised (established viable populations) outside its native range?                                                                             | No             | Coho salmon, which are native to the coastal area of the North Pacific Basin, have been introduced into many areas of North America, Asia, Europe and Latin America, although most attempts to establish naturalized populations have been unsuccessful.                                                                                                                                                                                       | Medium     |
| 10                                             | 3.02 | In the taxon's introduced range, are there known adverse impacts to wild stocks or commercial taxa?                                                                     | Yes            | Coho salmon compete with native lake trout <i>Salvelinus namaycush</i> (Page and Laird 1993). Fausch and White (1986) found that coho salmon may compete with brook trout <i>S. fontinalis</i> and brown trout <i>Salmo trutta</i> for food and space in the Great Lakes if resources become scarce. Coho have an advantage over brook and brown trout because of an earlier emergence and a larger size at emergence (Fausch and White 1986). | Very high  |
| 11                                             | 3.03 | In the taxon's introduced range, are there known adverse impacts to aquaculture?                                                                                        | No             | Such a fact is not known                                                                                                                                                                                                                                                                                                                                                                                                                       | Medium     |
| 12                                             | 3.04 | In the taxon's introduced range, are there known adverse impacts to ecosystem                                                                                           | No             | Such a fact is not known                                                                                                                                                                                                                                                                                                                                                                                                                       | Medium     |
| 13                                             | 3.05 | In the taxon's introduced range, are there known adverse socio-economic impacts?                                                                                        | No             | Such a fact is not known                                                                                                                                                                                                                                                                                                                                                                                                                       | Low        |
| B. Biology/Ecology                             |      |                                                                                                                                                                         |                |                                                                                                                                                                                                                                                                                                                                                                                                                                                |            |
| 4. Undesirable (or persistence) traits         |      |                                                                                                                                                                         |                |                                                                                                                                                                                                                                                                                                                                                                                                                                                |            |
| 14                                             | 4.01 | Is it likely that the taxon will be poisonous or pose other risks to human health?                                                                                      | No             | This species does not pose a threat to humans                                                                                                                                                                                                                                                                                                                                                                                                  | High       |
| 15                                             | 4.02 | Is it likely that the taxon will smother one or more native taxa (that are not threatened or protected)?                                                                | Yes            | Own judgement                                                                                                                                                                                                                                                                                                                                                                                                                                  | Medium     |
| 16                                             | 4.03 | Are there any threatened or protected taxa that the non-native taxon would parasitise in the RA area?                                                                   | Yes            | There are several protected and threatened species in the region which will be potential prey for <i>O. kisutch</i> , such as Sturgeons, <i>Luciobarbus capito</i> , <i>Salmo geyarkuni</i> , <i>Salmo labrax</i> , etc.                                                                                                                                                                                                                       | Very high  |
| 17                                             | 4.04 | Is the taxon adaptable in terms of climatic and other environmental conditions, thus enhancing its potential persistence if it has invaded or could invade the RA area? | Yes            | Own judgement                                                                                                                                                                                                                                                                                                                                                                                                                                  | Medium     |
| 18                                             | 4.05 | Is the taxon likely to disrupt food-web structure/function in aquatic ecosystems if it has invaded or is likely to invade the RA                                        | Yes            | <i>O. kisutch</i> is a predator fish and can disrupt food web structure in the freshwater ecosystems of the Caucasus region.                                                                                                                                                                                                                                                                                                                   | High       |
| 19                                             | 4.06 | Is the taxon likely to exert adverse impacts on ecosystem services in the RA area?                                                                                      | Yes            | If the species is distributed in the region, this is expected to happen                                                                                                                                                                                                                                                                                                                                                                        | Medium     |
| 20                                             | 4.07 | Is it likely that the taxon will host, and/or act as a vector for, recognised pests and infectious agents that are endemic in the RA                                    | Not applicable | Data deficient                                                                                                                                                                                                                                                                                                                                                                                                                                 | Low        |

|                                 |      |                                                                                                                                                                              |                |                                                                                                                                                                                                                                                                                                                                 |           |
|---------------------------------|------|------------------------------------------------------------------------------------------------------------------------------------------------------------------------------|----------------|---------------------------------------------------------------------------------------------------------------------------------------------------------------------------------------------------------------------------------------------------------------------------------------------------------------------------------|-----------|
| 21                              | 4.08 | Is it likely that the taxon will host, and/or act as a vector for, recognised pests and infectious agents that are absent from (novel to) the RA area?                       | Yes            | If the species is distributed in the region, this is expected to happen                                                                                                                                                                                                                                                         | Medium    |
| 22                              | 4.09 | Is it likely that the taxon will achieve a body size that will make it more likely to be released from captivity?                                                            | Yes            | Max length of <i>O. kisutch</i> is 108 cm; max. published weight: 15.2 kg, therefore this species has commercial value. The coho salmon stocks presently used in aquaculture were derived from government hatchery programmes in the United States of America and Canada, but most countries now rely on local sources.         | Very high |
| 23                              | 4.10 | Is the taxon capable of sustaining itself in a range of water velocity conditions (e.g. versatile in habitat use)?                                                           | Yes            | The fish occur in the ocean or in lakes; adults return to the rivers where they were born. The young fish emerge in springtime and they usually live in fresh water for 1-2 years (sometimes up to 4 years; later they migrate at night to freshwater lakes or to the sea.                                                      | Very high |
| 24                              | 4.11 | Is it likely that the taxon's mode of existence (e.g. excretion of by-products) or behaviours (e.g. feeding) will reduce habitat quality for native taxa?                    | Not applicable | Data deficient                                                                                                                                                                                                                                                                                                                  | Low       |
| 25                              | 4.12 | Is the taxon likely to maintain a viable population even when present in low densities (or persisting in adverse conditions by way of a dormant form)?                       | Not applicable | Data deficient                                                                                                                                                                                                                                                                                                                  | Low       |
| <b>5. Resource exploitation</b> |      |                                                                                                                                                                              |                |                                                                                                                                                                                                                                                                                                                                 |           |
| 26                              | 5.01 | Is the taxon likely to consume threatened or protected native taxa in the RA area?                                                                                           | Yes            | <i>O. kisutch</i> is a predator species and can eat native protected species in the SC region such as <i>L. capito</i> , <i>Salmo</i> spp, <i>Acipenser</i>                                                                                                                                                                     | High      |
| 27                              | 5.02 | Is the taxon likely to sequester food resources (including nutrients) to the detriment of native taxa in the RA area?                                                        | Yes            | Own judgement                                                                                                                                                                                                                                                                                                                   | Medium    |
| <b>6. Reproduction</b>          |      |                                                                                                                                                                              |                |                                                                                                                                                                                                                                                                                                                                 |           |
| 28                              | 6.01 | Is the taxon likely to exhibit parental care and/or to reduce age-at-maturity in response to environmental conditions?                                                       | Not applicable | Data deficient                                                                                                                                                                                                                                                                                                                  | Low       |
| 29                              | 6.02 | Is the taxon likely to produce viable gametes or propagules (in the RA area)?                                                                                                | No             | Such fact has not been detected yet                                                                                                                                                                                                                                                                                             | Very high |
| 30                              | 6.03 | Is the taxon likely to hybridise naturally with native taxa?                                                                                                                 | No             | Data deficient                                                                                                                                                                                                                                                                                                                  | Low       |
| 31                              | 6.04 | Is the taxon likely to be hermaphroditic or to display asexual reproduction?                                                                                                 | No             | Data deficient                                                                                                                                                                                                                                                                                                                  | Low       |
| 32                              | 6.05 | Is the taxon dependent on the presence of another taxon (or specific habitat features) to complete its life cycle?                                                           | Yes            | <i>O. kisutch</i> is an anadromous species and spawns in the rivers where they were born. Therefore fast flowing and oxygen rich waters are crucial for their reproduction.                                                                                                                                                     | High      |
| 33                              | 6.06 | Is the taxon known (or likely) to produce a large number of propagules or offspring within a short time span (e.g. < 1 year)?                                                | No             | In the wild, coho salmon usually mature during their third year of life, including 4–6 months in incubation, 15 months rearing in freshwater, and 18 months of ocean residence. Mature fish return to their rivers of origin during late summer and autumn. Spawning occurs between November and January. Female coho produce 2 | High      |
| 34                              | 6.07 | How many time units (days, months, years) does the taxon require to reach the age-at-first-reproduction?                                                                     | 3              | In the wild, coho salmon usually mature during their third year of life.                                                                                                                                                                                                                                                        | Very high |
| <b>7. Dispersal mechanisms</b>  |      |                                                                                                                                                                              |                |                                                                                                                                                                                                                                                                                                                                 |           |
| 35                              | 7.01 | How many potential internal vectors/pathways could the taxon use to disperse within the RA area (with suitable)                                                              | One            | This species may be disperse within the region by human through translocation                                                                                                                                                                                                                                                   | Medium    |
| 36                              | 7.02 | Will any of these vectors/pathways bring the taxon in close proximity to one or more protected areas (e.g. MCZ, MPA, SSSI)?                                                  | Yes            | There is a probability of this.                                                                                                                                                                                                                                                                                                 | Low       |
| 37                              | 7.03 | Does the taxon have a means of actively attaching itself to hard substrata (e.g. ship hulls, pilings, buoys) such that it enhances the likelihood of dispersal?              | No             | This species does not have such means                                                                                                                                                                                                                                                                                           | High      |
| 38                              | 7.04 | Is natural dispersal of the taxon likely to occur as eggs (for animals) or as propagules (for plants: seeds, spores) in the RA area?                                         | No             | This species does not inhabit the region                                                                                                                                                                                                                                                                                        | Medium    |
| 39                              | 7.05 | Is natural dispersal of the taxon likely to occur as larvae/juveniles (for animals) or as fragments/seedlings (for plants) in the RA area?                                   | No             | This species does not inhabit the region                                                                                                                                                                                                                                                                                        | Medium    |
| 40                              | 7.06 | Are older life stages of the taxon likely to migrate in the RA area for reproduction?                                                                                        | No             | This species does not inhabit the region                                                                                                                                                                                                                                                                                        | Medium    |
| 41                              | 7.07 | Are propagules or eggs of the taxon likely to be dispersed in the RA area by other animals?                                                                                  | No             | No such fact has been detected                                                                                                                                                                                                                                                                                                  | Medium    |
| 42                              | 7.08 | Is dispersal of the taxon along any of the vectors/pathways mentioned in the previous seven questions (35–41; i.e. both unintentional or intentional) likely to be           | No             | Own judgement                                                                                                                                                                                                                                                                                                                   | Medium    |
| 43                              | 7.09 | Is dispersal of the taxon density dependent?                                                                                                                                 | Yes            | Such a fact is not known                                                                                                                                                                                                                                                                                                        | Low       |
| <b>8. Tolerance attributes</b>  |      |                                                                                                                                                                              |                |                                                                                                                                                                                                                                                                                                                                 |           |
| 44                              | 8.01 | Is the taxon able to withstand being out of water for extended periods (e.g. minimum of one or more hours) at some stage of its life cycle?                                  | No             | Such a fact is not known                                                                                                                                                                                                                                                                                                        | High      |
| 45                              | 8.02 | Is the taxon tolerant of a wide range of water quality conditions relevant to that taxon? [In the Justification field, indicate the relevant water quality variable(s) being | No             | No studies have been conducted in this direction                                                                                                                                                                                                                                                                                | Medium    |

|    |      |                                                                                                                   |     |                                                                                                                                                                                                                                                   |           |
|----|------|-------------------------------------------------------------------------------------------------------------------|-----|---------------------------------------------------------------------------------------------------------------------------------------------------------------------------------------------------------------------------------------------------|-----------|
| 46 | 8.03 | Can the taxon be controlled or eradicated in the wild with chemical, biological, or other agents/means?           | Yes | No studies have been conducted in this direction                                                                                                                                                                                                  | Medium    |
| 47 | 8.04 | Is the taxon likely to tolerate or benefit from environmental/human disturbance?                                  | Yes | This species is distributed through humans                                                                                                                                                                                                        | Medium    |
| 48 | 8.05 | Is the taxon able to tolerate salinity levels that are higher or lower than those found in its usual environment? | Yes | The fish occur in the ocean or in lakes; adults return to the rivers where they were born. The young fish emerge in springtime and they usually live in fresh water for 1-2 years, later they migrate at night to freshwater lakes or to the sea. | Very high |
| 49 | 8.06 | Are there effective natural enemies (predators) of the taxon present in the RA area?                              | Yes | There are several potential predators in the Caucasus region which can control the populations of <i>O. kisutch</i> : <i>Salmo</i> spp, <i>Squalius</i> spp, <i>Sander lucioperca</i> , otters, birds, etc.                                       | Very high |

#### C. Climate change

##### 9. Climate change

|    |      |                                                                                                                                                              |           |               |        |
|----|------|--------------------------------------------------------------------------------------------------------------------------------------------------------------|-----------|---------------|--------|
| 50 | 9.01 | Under the predicted future climatic conditions, are the risks of entry into the RA area posed by the taxon likely to increase, decrease or not change?       | No change | Own judgement | Medium |
| 51 | 9.02 | Under the predicted future climatic conditions, are the risks of establishment posed by the taxon likely to increase, decrease or not change?                | No change | Own judgement | Medium |
| 52 | 9.03 | Under the predicted future climatic conditions, are the risks of dispersal within the RA area posed by the taxon likely to increase, decrease or not change? | Increase  | Own judgement | Medium |
| 53 | 9.04 | Under the predicted future climatic conditions, what is the likely magnitude of future potential impacts on biodiversity and/or ecological integrity/status? | No change | Own judgement | Medium |
| 54 | 9.05 | Under the predicted future climatic conditions, what is the likely magnitude of future potential impacts on ecosystem structure and/or function?             | No change | Own judgement | Medium |
| 55 | 9.06 | Under the predicted future climatic conditions, what is the likely magnitude of future potential impacts on ecosystem services/socio-economic factors?       | No change | Own judgement | Medium |

| Statistics                                     |             |
|------------------------------------------------|-------------|
| Scores                                         |             |
| <b>BRA</b>                                     | <b>15.0</b> |
| <b>BRA Outcome</b>                             | <b>-</b>    |
| <b>BRA+CCA</b>                                 | <b>17.0</b> |
| <b>BRA+CCA Outcome</b>                         | <b>-</b>    |
| Score partition                                |             |
| <b>A. Biogeography/Historical</b>              | <b>5.0</b>  |
| 1. Domestication/Cultivation                   | 4.0         |
| 2. Climate, distribution and introduction risk | 0.0         |
| 3. Invasive elsewhere                          | 1.0         |
| <b>B. Biology/Ecology</b>                      | <b>10.0</b> |
| 4. Undesirable (or persistence) traits         | 8.0         |
| 5. Resource exploitation                       | 7.0         |
| 6. Reproduction                                | -3.0        |
| 7. Dispersal mechanisms                        | -3.0        |
| 8. Tolerance attributes                        | 1.0         |
| <b>C. Climate change</b>                       | <b>2.0</b>  |
| 9. Climate change                              | 2.0         |
| Answered Questions                             |             |
| <b>Total</b>                                   | <b>55</b>   |
| <b>A. Biogeography/Historical</b>              | <b>13</b>   |
| 1. Domestication/Cultivation                   | 3           |
| 2. Climate, distribution and introduction risk | 5           |
| 3. Invasive elsewhere                          | 5           |
| <b>B. Biology/Ecology</b>                      | <b>36</b>   |
| 4. Undesirable (or persistence) traits         | 12          |
| 5. Resource exploitation                       | 2           |
| 6. Reproduction                                | 7           |
| 7. Dispersal mechanisms                        | 9           |
| 8. Tolerance attributes                        | 6           |
| <b>C. Climate change</b>                       | <b>6</b>    |
| 9. Climate change                              | 6           |
| Sectors affected                               |             |
| <b>Commercial</b>                              | <b>6</b>    |
| <b>Environmental</b>                           | <b>8</b>    |
| <b>Species or population nuisance traits</b>   | <b>4</b>    |

| Thresholds     |             |
|----------------|-------------|
| <b>BRA</b>     | <b>-</b>    |
| <b>BRA+CCA</b> | <b>-</b>    |
| Confidence     |             |
| <b>BRA+CCA</b> | <b>0.60</b> |
| <b>BRA</b>     | <b>0.61</b> |
| <b>CCA</b>     | <b>0.50</b> |



| Date and Time       |
|---------------------|
| 13/05/2022 14:06:24 |

## AS-ISK v2

| Taxon and Assessor details         |                                                                                                                                   |
|------------------------------------|-----------------------------------------------------------------------------------------------------------------------------------|
| Category                           | Fishes and Lampreys (freshwater)                                                                                                  |
| Taxon name                         | <i>Oncorhynchus kisutch</i>                                                                                                       |
| Common name                        | coho salmon                                                                                                                       |
| Assessor                           | Tatia Kuljanishvili                                                                                                               |
| Risk screening context             |                                                                                                                                   |
| Reason and socio-economic benefits | This species was transported from Kamchatka in Russia to Azerbaijan in 1977-83, to the Chaykend                                   |
| Risk assessment area               | South Caucasus                                                                                                                    |
| Taxonomy                           | Actinopteri (ray-finned fishes) > Salmoniformes (Salmons) > Salmonidae (Salmonids) >                                              |
| Native range                       | northern Pacific Ocean.                                                                                                           |
| Introduced range                   | Caspian Sea basin                                                                                                                 |
| URL                                | <a href="https://www.fishbase.se/summary/Oncorhynchus-kisutch.html">https://www.fishbase.se/summary/Oncorhynchus-kisutch.html</a> |

|                                                |      | Response                                                                                                                                                                | Justification (references and/or other information) | Confidence                                                                                                                                                                                                                                                                                                                                                                                    |           |
|------------------------------------------------|------|-------------------------------------------------------------------------------------------------------------------------------------------------------------------------|-----------------------------------------------------|-----------------------------------------------------------------------------------------------------------------------------------------------------------------------------------------------------------------------------------------------------------------------------------------------------------------------------------------------------------------------------------------------|-----------|
| A. Biogeography/Historical                     |      |                                                                                                                                                                         |                                                     |                                                                                                                                                                                                                                                                                                                                                                                               |           |
| 1. Domestication/Cultivation                   |      |                                                                                                                                                                         |                                                     |                                                                                                                                                                                                                                                                                                                                                                                               |           |
| 1                                              | 1.01 | Has the taxon been the subject of domestication (or cultivation) for at least 20 generations?                                                                           | Yes                                                 | Has been farmed in marine environments                                                                                                                                                                                                                                                                                                                                                        | Very high |
| 2                                              | 1.02 | Is the taxon harvested in the wild and likely to be sold or used in its live form?                                                                                      | Yes                                                 | This kind is traded as fresh fish, dried or salted, smoked, canned, preserved and frozen (Ref. 9988)                                                                                                                                                                                                                                                                                          | Very high |
| 3                                              | 1.03 | Does the taxon have invasive races, varieties, sub-taxa or congeners?                                                                                                   | Yes                                                 | Examples: golden trout, brook trout, brown trout (Knapp 1996)                                                                                                                                                                                                                                                                                                                                 | Very high |
| 2. Climate, distribution and introduction risk |      |                                                                                                                                                                         |                                                     |                                                                                                                                                                                                                                                                                                                                                                                               |           |
| 4                                              | 2.01 | How similar are the climatic conditions of the Risk Assessment (RA) area and the taxon's native range?                                                                  | Medium                                              | Climate is somehow similar                                                                                                                                                                                                                                                                                                                                                                    | High      |
| 5                                              | 2.02 | What is the quality of the climate matching data?                                                                                                                       | Medium                                              | Medium                                                                                                                                                                                                                                                                                                                                                                                        | Medium    |
| 6                                              | 2.03 | Is the taxon already present outside of captivity in the RA area?                                                                                                       | No                                                  | This species was transported from Kamchatka in Russia to Azerbaijan in 1977-83, to the Chaykend fish hatchery in the form of fertilized eggs. After incubation, the hatched fries were released into the Caspian Sea (Musayev et al. 2004). However, there is no data on the results of the acclimatization of this fish and no                                                               | Low       |
| 7                                              | 2.04 | How many potential vectors could the taxon use to enter in the RA area?                                                                                                 | One                                                 | Aquaculture                                                                                                                                                                                                                                                                                                                                                                                   | Medium    |
| 8                                              | 2.05 | Is the taxon currently found in close proximity to, and likely to enter into, the RA area in the near future (e.g. unintentional and intentional introductions)?        | No                                                  | No evidence                                                                                                                                                                                                                                                                                                                                                                                   | Medium    |
| 3. Invasive elsewhere                          |      |                                                                                                                                                                         |                                                     |                                                                                                                                                                                                                                                                                                                                                                                               |           |
| 9                                              | 3.01 | Has the taxon become naturalised (established viable populations) outside its                                                                                           | Yes                                                 | In Great lakes for example                                                                                                                                                                                                                                                                                                                                                                    | High      |
| 10                                             | 3.02 | In the taxon's introduced range, are there known adverse impacts to wild stocks or commercial taxa?                                                                     | Yes                                                 | Through a meta-analysis of existing data, we show a reduction in survival or abundance of Atlantic salmon; sea trout; and pink, chum, and coho salmon in association with increased production of farmed salmon.<br><a href="https://journals.plos.org/plosbiology/article?id=10.1371/journal.pbio.0060033">https://journals.plos.org/plosbiology/article?id=10.1371/journal.pbio.0060033</a> | Very high |
| 11                                             | 3.03 | In the taxon's introduced range, are there known adverse impacts to aquaculture?                                                                                        | No                                                  | No data                                                                                                                                                                                                                                                                                                                                                                                       | Medium    |
| 12                                             | 3.04 | In the taxon's introduced range, are there known adverse impacts to ecosystem                                                                                           | No                                                  | No, However it can transmit diseases,                                                                                                                                                                                                                                                                                                                                                         | Medium    |
| 13                                             | 3.05 | In the taxon's introduced range, are there known adverse socio-economic impacts?                                                                                        | No                                                  | Not known                                                                                                                                                                                                                                                                                                                                                                                     | Medium    |
| B. Biology/Ecology                             |      |                                                                                                                                                                         |                                                     |                                                                                                                                                                                                                                                                                                                                                                                               |           |
| 4. Undesirable (or persistence) traits         |      |                                                                                                                                                                         |                                                     |                                                                                                                                                                                                                                                                                                                                                                                               |           |
| 14                                             | 4.01 | Is it likely that the taxon will be poisonous or pose other risks to human health?                                                                                      | No                                                  | Not poisonous                                                                                                                                                                                                                                                                                                                                                                                 | Very high |
| 15                                             | 4.02 | Is it likely that the taxon will smother one or more native taxa (that are not threatened or protected)?                                                                | Yes                                                 | Coho salmon farming was correlating to the mortality of native salmonid species<br><a href="https://journals.plos.org/plosbiology/article?id=10.1371/journal.pbio.0060033">https://journals.plos.org/plosbiology/article?id=10.1371/journal.pbio.0060033</a>                                                                                                                                  | High      |
| 16                                             | 4.03 | Are there any threatened or protected taxa that the non-native taxon would parasitise in the RA area?                                                                   | No                                                  | Does not parasite                                                                                                                                                                                                                                                                                                                                                                             | Very high |
| 17                                             | 4.04 | Is the taxon adaptable in terms of climatic and other environmental conditions, thus enhancing its potential persistence if it has invaded or could invade the RA area? | Yes                                                 | Coho salmon can tolerate temperatures ranging from 5 to 25 degrees celsius (Brett 1952). Later studies show that it can tolerate temperatures up to 29.5, and this findings were important to assess the potential ecological consequences of this species if entered environments, that are characterised with temperatures above their normal tolerance limit (Chen et al 2015).            | Medium    |
| 18                                             | 4.05 | Is the taxon likely to disrupt food-web structure/function in aquatic ecosystems if it has invaded or is likely to invade the RA                                        | No                                                  | There is no information available                                                                                                                                                                                                                                                                                                                                                             | Low       |
| 19                                             | 4.06 | Is the taxon likely to exert adverse impacts on ecosystem services in the RA area?                                                                                      | Yes                                                 | Can transmit diseases                                                                                                                                                                                                                                                                                                                                                                         | Low       |
| 20                                             | 4.07 | Is it likely that the taxon will host, and/or act as a vector for, recognised pests and infectious agents that are endemic in the RA                                    | Yes                                                 | It is likely. However no information available about it                                                                                                                                                                                                                                                                                                                                       | Low       |

|                                 |      |                                                                                                                                                                              |     |                                                                                                                                             |           |
|---------------------------------|------|------------------------------------------------------------------------------------------------------------------------------------------------------------------------------|-----|---------------------------------------------------------------------------------------------------------------------------------------------|-----------|
| 21                              | 4.08 | Is it likely that the taxon will host, and/or act as a vector for, recognised pests and infectious agents that are absent from (novel to) the RA area?                       | Yes | It is likely. However no information available about it                                                                                     | High      |
| 22                              | 4.09 | Is it likely that the taxon will achieve a body size that will make it more likely to be released from captivity?                                                            | Yes | Yes. See: <a href="https://www.fishbase.se/summary/Oncorhynchus-kisutch.html">https://www.fishbase.se/summary/Oncorhynchus-kisutch.html</a> | High      |
| 23                              | 4.10 | Is the taxon capable of sustaining itself in a range of water velocity conditions (e.g. versatile in habitat use)?                                                           | Yes | It is migratory species that can sustain itself in a range of water velocity conditions                                                     | Very high |
| 24                              | 4.11 | Is it likely that the taxon's mode of existence (e.g. excretion of by-products) or behaviours (e.g. feeding) will reduce habitat quality for native taxa?                    | No  | No data                                                                                                                                     | High      |
| 25                              | 4.12 | Is the taxon likely to maintain a viable population even when present in low densities (or persisting in adverse conditions by way of a dormant form)?                       | No  | No information available                                                                                                                    | Low       |
| <b>5. Resource exploitation</b> |      |                                                                                                                                                                              |     |                                                                                                                                             |           |
| 26                              | 5.01 | Is the taxon likely to consume threatened or protected native taxa in the RA area?                                                                                           | Yes | It is likely                                                                                                                                | Medium    |
| 27                              | 5.02 | Is the taxon likely to sequester food resources (including nutrients) to the detriment of native taxa in the RA area?                                                        | No  | No information                                                                                                                              | Low       |
| <b>6. Reproduction</b>          |      |                                                                                                                                                                              |     |                                                                                                                                             |           |
| 28                              | 6.01 | Is the taxon likely to exhibit parental care and/or to reduce age-at-maturity in response to environmental conditions?                                                       | Yes | Female salmon construct and defend nests, whereas male salmon provide no parental care                                                      | High      |
| 29                              | 6.02 | Is the taxon likely to produce viable gametes or propagules (in the RA area)?                                                                                                | No  | No. climate is not suitable                                                                                                                 | Medium    |
| 30                              | 6.03 | Is the taxon likely to hybridise naturally with native taxa?                                                                                                                 | Yes | Yes it is possible                                                                                                                          | Low       |
| 31                              | 6.04 | Is the taxon likely to be hermaphroditic or to display asexual reproduction?                                                                                                 | No  | No. Does not display asexual reproduction                                                                                                   | High      |
| 32                              | 6.05 | Is the taxon dependent on the presence of another taxon (or specific habitat features) to complete its life cycle?                                                           | No  | No. See: <a href="https://www.fishbase.se/summary/Oncorhynchus-kisutch.html">https://www.fishbase.se/summary/Oncorhynchus-kisutch.html</a>  | Very high |
| 33                              | 6.06 | Is the taxon known (or likely) to produce a large number of propagules or offspring within a short time span (e.g. < 1 year)?                                                | No  | It can produce 2400-2800 eggs                                                                                                               | Medium    |
| 34                              | 6.07 | How many time units (days, months, years) does the taxon require to reach the age-at-first-reproduction?                                                                     | 4   | 4 years                                                                                                                                     | Very high |
| <b>7. Dispersal mechanisms</b>  |      |                                                                                                                                                                              |     |                                                                                                                                             |           |
| 35                              | 7.01 | How many potential internal vectors/pathways could the taxon use to disperse within the RA area (with suitable)                                                              | One | Aquaculture                                                                                                                                 | Medium    |
| 36                              | 7.02 | Will any of these vectors/pathways bring the taxon in close proximity to one or more protected areas (e.g. MCZ, MPA, SSSI)?                                                  | No  | Less likely                                                                                                                                 | Low       |
| 37                              | 7.03 | Does the taxon have a means of actively attaching itself to hard substrata (e.g. ship hulls, pilings, buoys) such that it enhances the likelihood of dispersal?              | No  | No. Morphologically this species does not have a means of actively attaching itself to hard substrata                                       | Very high |
| 38                              | 7.04 | Is natural dispersal of the taxon likely to occur as eggs (for animals) or as propagules (for plants: seeds, spores) in the RA area?                                         | No  | No. can not be distributed as eggs.                                                                                                         | Very high |
| 39                              | 7.05 | Is natural dispersal of the taxon likely to occur as larvae/juveniles (for animals) or as fragments/seedlings (for plants) in the RA area?                                   | Yes | yes. it could be possible                                                                                                                   | Medium    |
| 40                              | 7.06 | Are older life stages of the taxon likely to migrate in the RA area for reproduction?                                                                                        | No  | Does not migrate for reproduction                                                                                                           | High      |
| 41                              | 7.07 | Are propagules or eggs of the taxon likely to be dispersed in the RA area by other animals?                                                                                  | No  | No. Can not be dispersed by other animals                                                                                                   | Very high |
| 42                              | 7.08 | Is dispersal of the taxon along any of the vectors/pathways mentioned in the previous seven questions (35-41; i.e. both unintentional or intentional) likely to be           | No  | Not rapid                                                                                                                                   | High      |
| 43                              | 7.09 | Is dispersal of the taxon density dependent?                                                                                                                                 | No  | No info                                                                                                                                     | Low       |
| <b>8. Tolerance attributes</b>  |      |                                                                                                                                                                              |     |                                                                                                                                             |           |
| 44                              | 8.01 | Is the taxon able to withstand being out of water for extended periods (e.g. minimum of one or more hours) at some stage of its life cycle?                                  | No  | No information available                                                                                                                    | Very high |
| 45                              | 8.02 | Is the taxon tolerant of a wide range of water quality conditions relevant to that taxon? [In the Justification field, indicate the relevant water quality variable(s) being | No  | Can not tolerate low oxygen environment and is very sensitive to temperature and to human-produced chemicals.                               | Medium    |
| 46                              | 8.03 | Can the taxon be controlled or eradicated in the wild with chemical, biological, or other agents/means?                                                                      | Yes | It can be                                                                                                                                   | Low       |
| 47                              | 8.04 | Is the taxon likely to tolerate or benefit from environmental/human disturbance?                                                                                             | No  | No information available                                                                                                                    | High      |

|                          |      |                                                                                                                                                              |           |                                                                                                                                                                                                                                                      |           |
|--------------------------|------|--------------------------------------------------------------------------------------------------------------------------------------------------------------|-----------|------------------------------------------------------------------------------------------------------------------------------------------------------------------------------------------------------------------------------------------------------|-----------|
| 48                       | 8.05 | Is the taxon able to tolerate salinity levels that are higher or lower than those found in its usual environment?                                            | No        | No information available                                                                                                                                                                                                                             | Very high |
| 49                       | 8.06 | Are there effective natural enemies (predators) of the taxon present in the RA                                                                               | No        | No effective natural enemies present in RA area                                                                                                                                                                                                      | High      |
| <b>C. Climate change</b> |      |                                                                                                                                                              |           |                                                                                                                                                                                                                                                      |           |
| <b>9. Climate change</b> |      |                                                                                                                                                              |           |                                                                                                                                                                                                                                                      |           |
| 50                       | 9.01 | Under the predicted future climatic conditions, are the risks of entry into the RA area posed by the taxon likely to increase, decrease or not change?       | Increase  | It was hypothesized that climate change might alert the mechanisms of transportation and introduction of non-native species. Commercial and recreational activities will increase, that itself increases the propagule pressure levels of non-native | High      |
| 51                       | 9.02 | Under the predicted future climatic conditions, are the risks of establishment posed by the taxon likely to increase, decrease or not change?                | Decrease  | Since this species can not tolerate high temperatures, risks of establishment posed by taxon likely decrease                                                                                                                                         | Medium    |
| 52                       | 9.03 | Under the predicted future climatic conditions, are the risks of dispersal within the RA area posed by the taxon likely to increase, decrease or not change? | Decrease  | Decrease                                                                                                                                                                                                                                             | Medium    |
| 53                       | 9.04 | Under the predicted future climatic conditions, what is the likely magnitude of future potential impacts on biodiversity and/or ecological integrity/status? | Lower     | Lower                                                                                                                                                                                                                                                | Low       |
| 54                       | 9.05 | Under the predicted future climatic conditions, what is the likely magnitude of future potential impacts on ecosystem structure and/or function?             | No change | No change                                                                                                                                                                                                                                            | Medium    |
| 55                       | 9.06 | Under the predicted future climatic conditions, what is the likely magnitude of future potential impacts on ecosystem services/socio-economic factors?       | No change | No change                                                                                                                                                                                                                                            | High      |

| Statistics                                     |             |
|------------------------------------------------|-------------|
| Scores                                         |             |
| <b>BRA</b>                                     | <b>14.5</b> |
| <b>BRA Outcome</b>                             | <b>-</b>    |
| <b>BRA+CCA</b>                                 | <b>10.5</b> |
| <b>BRA+CCA Outcome</b>                         | <b>-</b>    |
| Score partition                                |             |
| <b>A. Biogeography/Historical</b>              | <b>8.5</b>  |
| 1. Domestication/Cultivation                   | 4.0         |
| 2. Climate, distribution and introduction risk | 0.0         |
| 3. Invasive elsewhere                          | 4.5         |
| <b>B. Biology/Ecology</b>                      | <b>6.0</b>  |
| 4. Undesirable (or persistence) traits         | 7.0         |
| 5. Resource exploitation                       | 5.0         |
| 6. Reproduction                                | 1.0         |
| 7. Dispersal mechanisms                        | -3.0        |
| 8. Tolerance attributes                        | -4.0        |
| <b>C. Climate change</b>                       | <b>-4.0</b> |
| 9. Climate change                              | -4.0        |
| Answered Questions                             |             |
| <b>Total</b>                                   | <b>55</b>   |
| <b>A. Biogeography/Historical</b>              | <b>13</b>   |
| 1. Domestication/Cultivation                   | 3           |
| 2. Climate, distribution and introduction risk | 5           |
| 3. Invasive elsewhere                          | 5           |
| <b>B. Biology/Ecology</b>                      | <b>36</b>   |
| 4. Undesirable (or persistence) traits         | 12          |
| 5. Resource exploitation                       | 2           |
| 6. Reproduction                                | 7           |
| 7. Dispersal mechanisms                        | 9           |
| 8. Tolerance attributes                        | 6           |
| <b>C. Climate change</b>                       | <b>6</b>    |
| 9. Climate change                              | 6           |
| Sectors affected                               |             |
| <b>Commercial</b>                              | <b>6</b>    |
| <b>Environmental</b>                           | <b>4</b>    |
| <b>Species or population nuisance traits</b>   | <b>1</b>    |

| Thresholds     |             |
|----------------|-------------|
| <b>BRA</b>     | <b>-</b>    |
| <b>BRA+CCA</b> | <b>-</b>    |
| Confidence     |             |
| <b>BRA+CCA</b> | <b>0.64</b> |
| <b>BRA</b>     | <b>0.65</b> |
| <b>CCA</b>     | <b>0.54</b> |

| Date and Time       |
|---------------------|
| 21/05/2022 15:13:14 |

AS-ISK v2

| Taxon and Assessor details         |                                                                                                                                 |
|------------------------------------|---------------------------------------------------------------------------------------------------------------------------------|
| Category                           | Fishes and Lampreys (freshwater)                                                                                                |
| Taxon name                         | <i>Oncorhynchus mykiss</i>                                                                                                      |
| Common name                        | rainbow trout                                                                                                                   |
| Assessor                           | Bella Japoshvili                                                                                                                |
| Risk screening context             |                                                                                                                                 |
| Reason and socio-economic benefits | This economically important species were widely introduced in the RA area                                                       |
| Risk assessment area               | South Caucasus                                                                                                                  |
| Taxonomy                           | Actinopteri (ray-finned fishes) > Salmoniformes (Salmons) > Salmonidae (Salmonids)                                              |
| Native range                       | North Atlantic                                                                                                                  |
| Introduced range                   | Worldwide                                                                                                                       |
| URL                                | <a href="https://www.fishbase.de/summary/Oncorhynchus-mykiss.html">https://www.fishbase.de/summary/Oncorhynchus-mykiss.html</a> |

|                                                |      |                                                                                                                                                                         | Response | Justification (references and/or other information)                                                                                                                                                                                                                                                            | Confidence |
|------------------------------------------------|------|-------------------------------------------------------------------------------------------------------------------------------------------------------------------------|----------|----------------------------------------------------------------------------------------------------------------------------------------------------------------------------------------------------------------------------------------------------------------------------------------------------------------|------------|
| A. Biogeography/Historical                     |      |                                                                                                                                                                         |          |                                                                                                                                                                                                                                                                                                                |            |
| 1. Domestication/Cultivation                   |      |                                                                                                                                                                         |          |                                                                                                                                                                                                                                                                                                                |            |
| 1                                              | 1.01 | Has the taxon been the subject of domestication (or cultivation) for at least 20 generations?                                                                           | Yes      | e.g. Wysocki, L. E., Davidson III, J. W., Smith, M. E., Frankel, A. S., Ellison, W. T., Mazik, P. M., ... & Bebak, J. (2007). Effects of aquaculture production noise on hearing, growth, and disease resistance of rainbow trout <i>Oncorhynchus mykiss</i> . <i>Aquaculture</i> , 272(1-4), 687-697.         | Very high  |
| 2                                              | 1.02 | Is the taxon harvested in the wild and likely to be sold or used in its live form?                                                                                      | Yes      | Definitely in the past. However, currently the species can be cultured in the farms or collected within the introduced range                                                                                                                                                                                   | Low        |
| 3                                              | 1.03 | Does the taxon have invasive races, varieties, sub-taxa or congeners?                                                                                                   | Yes      | Other trouts                                                                                                                                                                                                                                                                                                   | Very high  |
| 2. Climate, distribution and introduction risk |      |                                                                                                                                                                         |          |                                                                                                                                                                                                                                                                                                                |            |
| 4                                              | 2.01 | How similar are the climatic conditions of the Risk Assessment (RA) area and the taxon's native range?                                                                  | Medium   | Results of climatch algorithm                                                                                                                                                                                                                                                                                  | Low        |
| 5                                              | 2.02 | What is the quality of the climate matching data?                                                                                                                       | Low      | Due to low accuracy of local climate data                                                                                                                                                                                                                                                                      | High       |
| 6                                              | 2.03 | Is the taxon already present outside of captivity in the RA area?                                                                                                       | Yes      | Kottelat, M., & Freyhof, J. (2007). Handbook of European freshwater fishes. Publications Kottelat.                                                                                                                                                                                                             | Very high  |
| 7                                              | 2.04 | How many potential vectors could the taxon use to enter in the RA area?                                                                                                 | >1       | Human mediated translocation for aquacultural and recreational purpose                                                                                                                                                                                                                                         | High       |
| 8                                              | 2.05 | Is the taxon currently found in close proximity to, and likely to enter into, the RA area in the near future (e.g. unintentional and intentional introductions)?        | Yes      | Kuljanishvili, T., Mumladze, L., Japoshvili, B., Mustafayev, N., Ibrahimov, S., Patoka, J., ... & Kalous, L. (2021). The first unified inventory of non-native fishes of the South Caucasian countries, Armenia, Azerbaijan, and Georgia. <i>Knowledge &amp; Management of Aquatic Ecosystems</i> , (422), 32. | Very high  |
| 3. Invasive elsewhere                          |      |                                                                                                                                                                         |          |                                                                                                                                                                                                                                                                                                                |            |
| 9                                              | 3.01 | Has the taxon become naturalised (established viable populations) outside its native range?                                                                             | No       | Kuljanishvili, T., Mumladze, L., Japoshvili, B., Mustafayev, N., Ibrahimov, S., Patoka, J., ... & Kalous, L. (2021). The first unified inventory of non-native fishes of the South Caucasian countries, Armenia, Azerbaijan, and Georgia. <i>Knowledge &amp; Management of Aquatic Ecosystems</i> , (422), 32. | Medium     |
| 10                                             | 3.02 | In the taxon's introduced range, are there known adverse impacts to wild stocks or commercial taxa?                                                                     | Yes      | Behnke RJ, 2002. Trout and Salmon of North America. New York, USA: The Free Press, 359 pp                                                                                                                                                                                                                      | High       |
| 11                                             | 3.03 | In the taxon's introduced range, are there known adverse impacts to aquaculture?                                                                                        | No       | No documented evidence, and not expected                                                                                                                                                                                                                                                                       | High       |
| 12                                             | 3.04 | In the taxon's introduced range, are there known adverse impacts to ecosystem                                                                                           | No       | No documented evidence                                                                                                                                                                                                                                                                                         | Low        |
| 13                                             | 3.05 | In the taxon's introduced range, are there known adverse socio-economic impacts?                                                                                        | No       | No documented evidence                                                                                                                                                                                                                                                                                         | High       |
| B. Biology/Ecology                             |      |                                                                                                                                                                         |          |                                                                                                                                                                                                                                                                                                                |            |
| 4. Undesirable (or persistence) traits         |      |                                                                                                                                                                         |          |                                                                                                                                                                                                                                                                                                                |            |
| 14                                             | 4.01 | Is it likely that the taxon will be poisonous or pose other risks to human health?                                                                                      | No       | Species is harmless                                                                                                                                                                                                                                                                                            | Very high  |
| 15                                             | 4.02 | Is it likely that the taxon will smother one or more native taxa (that are not threatened or protected)?                                                                | Yes      | No documented evidence, professional judgement but also Behnke RJ, 2002. Trout and Salmon of North America. New York, USA: The Free Press, 359 pp                                                                                                                                                              | Medium     |
| 16                                             | 4.03 | Are there any threatened or protected taxa that the non-native taxon would parasitise in the RA area?                                                                   | No       | Not a parasite species                                                                                                                                                                                                                                                                                         | High       |
| 17                                             | 4.04 | Is the taxon adaptable in terms of climatic and other environmental conditions, thus enhancing its potential persistence if it has invaded or could invade the RA area? | No       | Based on professional judgement                                                                                                                                                                                                                                                                                | Medium     |
| 18                                             | 4.05 | Is the taxon likely to disrupt food-web structure/function in aquatic ecosystems if it has invaded or is likely to invade the RA                                        | No       | No documented evidence exists                                                                                                                                                                                                                                                                                  | Low        |
| 19                                             | 4.06 | Is the taxon likely to exert adverse impacts on ecosystem services in the RA area?                                                                                      | No       | No documented evidence elsewhere                                                                                                                                                                                                                                                                               | Low        |
| 20                                             | 4.07 | Is it likely that the taxon will host, and/or act as a vector for, recognised pests and infectious agents that are endemic in the RA                                    | No       | Based on professional judgement                                                                                                                                                                                                                                                                                | Low        |

|                                 |      |                                                                                                                                                                    |     |                                                                                                                                                                                                                                                                                                                                                                                                                                                                                              |           |
|---------------------------------|------|--------------------------------------------------------------------------------------------------------------------------------------------------------------------|-----|----------------------------------------------------------------------------------------------------------------------------------------------------------------------------------------------------------------------------------------------------------------------------------------------------------------------------------------------------------------------------------------------------------------------------------------------------------------------------------------------|-----------|
| 21                              | 4.08 | Is it likely that the taxon will host, and/or act as a vector for, recognised pests and infectious agents that are absent from (novel to) the RA area?             | Yes | E.g. Buchmann, K., Bresciani, J., 1997. Parasitic infections in pond-reared rainbow trout <i>Oncorhynchus mykiss</i> in Denmark. <i>Diseases of Aquatic Organisms</i> , 28(2), 125-138. doi: 10.3354/dao028125; Skov, J., Mehrdana, F., Marana, M. H., Bahloul, Q. Z. M., Jaafar, R. M., Sindberg, D., Jensen, H. M., Kania, P. W., Buchmann, K., 2014. Parasite infections of rainbow trout ( <i>Oncorhynchus mykiss</i> ) from Danish mariculture. <i>Aquaculture</i> . 434. 486-492. doi: | Medium    |
| 22                              | 4.09 | Is it likely that the taxon will achieve a body size that will make it more likely to be released from captivity?                                                  | No  | This can not be a reason of release. Usually they are intended to be released in wild                                                                                                                                                                                                                                                                                                                                                                                                        | High      |
| 23                              | 4.10 | Is the taxon capable of sustaining itself in a range of water velocity conditions (e.g. versatile in habitat use)?                                                 | Yes | Mountain rivers as well as marine waters for anadromous populations are known for the species                                                                                                                                                                                                                                                                                                                                                                                                | Very high |
| 24                              | 4.11 | Is it likely that the taxon's mode of existence (e.g. excretion of by-products) or behaviours (e.g. feeding) will reduce habitat quality for native taxa?          | No  | No documented evidence exist                                                                                                                                                                                                                                                                                                                                                                                                                                                                 | Low       |
| 25                              | 4.12 | Is the taxon likely to maintain a viable population even when present in low densities (or persisting in adverse conditions by way of a dormant form)?             | No  | Based on professional judgement.                                                                                                                                                                                                                                                                                                                                                                                                                                                             | Medium    |
| <b>5. Resource exploitation</b> |      |                                                                                                                                                                    |     |                                                                                                                                                                                                                                                                                                                                                                                                                                                                                              |           |
| 26                              | 5.01 | Is the taxon likely to consume threatened or protected native taxa in the RA area?                                                                                 | Yes | Some invertebrates, or even fishes                                                                                                                                                                                                                                                                                                                                                                                                                                                           | Medium    |
| 27                              | 5.02 | Is the taxon likely to sequester food resources (including nutrients) to the detriment of native taxa in the RA area?                                              | Yes | Native salmonids                                                                                                                                                                                                                                                                                                                                                                                                                                                                             | High      |
| <b>6. Reproduction</b>          |      |                                                                                                                                                                    |     |                                                                                                                                                                                                                                                                                                                                                                                                                                                                                              |           |
| 28                              | 6.01 | Is the taxon likely to exhibit parental care and/or to reduce age-at-maturity in response to environmental conditions?                                             | No  | Page, L.M. and B.M. Burr, 2011. A field guide to freshwater fishes of North America north of Mexico. Boston : Houghton Mifflin Harcourt, 663p.                                                                                                                                                                                                                                                                                                                                               | High      |
| 29                              | 6.02 | Is the taxon likely to produce viable gametes or propagules (in the RA area)?                                                                                      | No  | No documented evidence exist. There are unpublished own data about the escape of <i>O. mykiss</i> from aquaculture with no cases of juveniles born in the wild.                                                                                                                                                                                                                                                                                                                              | Low       |
| 30                              | 6.03 | Is the taxon likely to hybridise naturally with native taxa?                                                                                                       | Yes | Young, W. P., Ostberg, C. O., Keim, P., & Thorgaard, G. H. (2001). Genetic characterization of hybridization and introgression between anadromous rainbow trout ( <i>Oncorhynchus mykiss</i> irideus) and coastal cutthroat trout ( <i>O. clarki clarki</i> ). <i>Molecular</i>                                                                                                                                                                                                              | Very high |
| 31                              | 6.04 | Is the taxon likely to be hermaphroditic or to display asexual reproduction?                                                                                       | No  | No documented evidence of asexuality                                                                                                                                                                                                                                                                                                                                                                                                                                                         | High      |
| 32                              | 6.05 | Is the taxon dependent on the presence of another taxon (or specific habitat features) to complete its life cycle?                                                 | No  | No such an evidence exists                                                                                                                                                                                                                                                                                                                                                                                                                                                                   | Very high |
| 33                              | 6.06 | Is the taxon known (or likely) to produce a large number of propagules or offspring within a short time span (e.g. < 1 year)?                                      | Yes | Several thousands of eggs per year                                                                                                                                                                                                                                                                                                                                                                                                                                                           | Very high |
| 34                              | 6.07 | How many time units (days, months, years) does the taxon require to reach the age-at-first-reproduction?                                                           | 3   | years                                                                                                                                                                                                                                                                                                                                                                                                                                                                                        | Very high |
| <b>7. Dispersal mechanisms</b>  |      |                                                                                                                                                                    |     |                                                                                                                                                                                                                                                                                                                                                                                                                                                                                              |           |
| 35                              | 7.01 | How many potential internal vectors/pathways could the taxon use to disperse within the RA area (with suitable vectors/pathways)?                                  | >1  | Popular species for aquaculture and recreational fisheries. If established at single point it can disperse naturally as well                                                                                                                                                                                                                                                                                                                                                                 | High      |
| 36                              | 7.02 | Will any of these vectors/pathways bring the taxon in close proximity to one or more protected areas (e.g. MCZ, MPA, SSSI)?                                        | Yes | Colchis natural park along the Black Sea coast                                                                                                                                                                                                                                                                                                                                                                                                                                               | High      |
| 37                              | 7.03 | Does the taxon have a means of actively attaching itself to hard substrata (e.g. ship hulls, pilings, buoys) such that it enhances the likelihood of dispersal?    | No  | No such an evidence, nor fish biology morphology support this behavior                                                                                                                                                                                                                                                                                                                                                                                                                       | Very high |
| 38                              | 7.04 | Is natural dispersal of the taxon likely to occur as eggs (for animals) or as propagules (for plants: seeds, spores) in the RA area?                               | No  | Not known from neighbouring areas in the wild                                                                                                                                                                                                                                                                                                                                                                                                                                                | Very high |
| 39                              | 7.05 | Is natural dispersal of the taxon likely to occur as larvae/juveniles (for animals) or as fragments/seedlings (for plants) in the RA area?                         | Yes | Juveniles are migrating                                                                                                                                                                                                                                                                                                                                                                                                                                                                      | Very high |
| 40                              | 7.06 | Are older life stages of the taxon likely to migrate in the RA area for reproduction?                                                                              | No  | Although there are anadromous populations known for <i>O. mykiss</i> in its native range there are no such populations in the neighboring sea of RA area                                                                                                                                                                                                                                                                                                                                     | Low       |
| 41                              | 7.07 | Are propagules or eggs of the taxon likely to be dispersed in the RA area by other animals?                                                                        | No  | No such an evidence exists                                                                                                                                                                                                                                                                                                                                                                                                                                                                   | Very high |
| 42                              | 7.08 | Is dispersal of the taxon along any of the vectors/pathways mentioned in the previous seven questions (35-41; i.e. both unintentional or intentional) likely to be | Yes | Given the large amount of aquacultural units in RA area                                                                                                                                                                                                                                                                                                                                                                                                                                      | Medium    |
| 43                              | 7.09 | Is dispersal of the taxon density dependent?                                                                                                                       | No  | No documented evidence exist                                                                                                                                                                                                                                                                                                                                                                                                                                                                 | High      |
| <b>8. Tolerance attributes</b>  |      |                                                                                                                                                                    |     |                                                                                                                                                                                                                                                                                                                                                                                                                                                                                              |           |
| 44                              | 8.01 | Is the taxon able to withstand being out of water for extended periods (e.g. minimum of one or more hours) at some stage of its life cycle?                        | No  | No such an evidence, although the salmonids generally can not cope with out of water conditions                                                                                                                                                                                                                                                                                                                                                                                              | High      |

|                          |      |                                                                                                                                                                              |           |                                                                                         |        |
|--------------------------|------|------------------------------------------------------------------------------------------------------------------------------------------------------------------------------|-----------|-----------------------------------------------------------------------------------------|--------|
| 45                       | 8.02 | Is the taxon tolerant of a wide range of water quality conditions relevant to that taxon? [In the Justification field, indicate the relevant water quality variable(s) being | No        | Based on professional judgement.                                                        | Medium |
| 46                       | 8.03 | Can the taxon be controlled or eradicated in the wild with chemical, biological, or other agents/means?                                                                      | Yes       | Based on professional judgement, no documented evidence.                                | Low    |
| 47                       | 8.04 | Is the taxon likely to tolerate or benefit from environmental/human disturbance?                                                                                             | No        | Based on professional judgement                                                         | High   |
| 48                       | 8.05 | Is the taxon able to tolerate salinity levels that are higher or lower than those found in its usual environment?                                                            | No        | No documented evidence                                                                  | Medium |
| 49                       | 8.06 | Are there effective natural enemies (predators) of the taxon present in the RA                                                                                               | No        | Not known anu effective natural enemy from the RA area (based on professinal judgement) | Medium |
| <b>C. Climate change</b> |      |                                                                                                                                                                              |           |                                                                                         |        |
| <b>9. Climate change</b> |      |                                                                                                                                                                              |           |                                                                                         |        |
| 50                       | 9.01 | Under the predicted future climatic conditions, are the risks of entry into the RA area posed by the taxon likely to increase, decrease or not change?                       | Increase  | Based on professional judgement                                                         | Low    |
| 51                       | 9.02 | Under the predicted future climatic conditions, are the risks of establishment posed by the taxon likely to increase, decrease or not change?                                | Decrease  | Based on professional judgement                                                         | Medium |
| 52                       | 9.03 | Under the predicted future climatic conditions, are the risks of dispersal within the RA area posed by the taxon likely to increase, decrease or not change?                 | No change | Based on professional judgement                                                         | Medium |
| 53                       | 9.04 | Under the predicted future climatic conditions, what is the likely magnitude of future potential impacts on biodiversity and/or ecological integrity/status?                 | No change | Based on professional judgement                                                         | Low    |
| 54                       | 9.05 | Under the predicted future climatic conditions, what is the likely magnitude of future potential impacts on ecosystem structure and/or function?                             | No change | Based on professional judgement                                                         | Low    |
| 55                       | 9.06 | Under the predicted future climatic conditions, what is the likely magnitude of future potential impacts on ecosystem services/socio-economic factors?                       | No change | Based on professional judgement                                                         | Low    |

| Statistics                                     |             |
|------------------------------------------------|-------------|
| Scores                                         |             |
| <b>BRA</b>                                     | <b>15.0</b> |
| <b>BRA Outcome</b>                             | <b>-</b>    |
| <b>BRA+CCA</b>                                 | <b>15.0</b> |
| <b>BRA+CCA Outcome</b>                         | <b>-</b>    |
| Score partition                                |             |
| <b>A. Biogeography/Historical</b>              | <b>8.0</b>  |
| 1. Domestication/Cultivation                   | 4.0         |
| 2. Climate, distribution and introduction risk | 2.0         |
| 3. Invasive elsewhere                          | 2.0         |
| <b>B. Biology/Ecology</b>                      | <b>7.0</b>  |
| 4. Undesirable (or persistence) traits         | 2.0         |
| 5. Resource exploitation                       | 7.0         |
| 6. Reproduction                                | 2.0         |
| 7. Dispersal mechanisms                        | 0.0         |
| 8. Tolerance attributes                        | -4.0        |
| <b>C. Climate change</b>                       | <b>0.0</b>  |
| 9. Climate change                              | 0.0         |
| Answered Questions                             |             |
| <b>Total</b>                                   | <b>55</b>   |
| <b>A. Biogeography/Historical</b>              | <b>13</b>   |
| 1. Domestication/Cultivation                   | 3           |
| 2. Climate, distribution and introduction risk | 5           |
| 3. Invasive elsewhere                          | 5           |
| <b>B. Biology/Ecology</b>                      | <b>36</b>   |
| 4. Undesirable (or persistence) traits         | 12          |
| 5. Resource exploitation                       | 2           |
| 6. Reproduction                                | 7           |
| 7. Dispersal mechanisms                        | 9           |
| 8. Tolerance attributes                        | 6           |
| <b>C. Climate change</b>                       | <b>6</b>    |
| 9. Climate change                              | 6           |
| Sectors affected                               |             |
| <b>Commercial</b>                              | <b>11</b>   |
| <b>Environmental</b>                           | <b>6</b>    |
| <b>Species or population nuisance traits</b>   | <b>3</b>    |

| Thresholds     |             |
|----------------|-------------|
| <b>BRA</b>     | <b>-</b>    |
| <b>BRA+CCA</b> | <b>-</b>    |
| Confidence     |             |
| <b>BRA+CCA</b> | <b>0.63</b> |
| <b>BRA</b>     | <b>0.67</b> |

|     |      |
|-----|------|
| CCA | 0.33 |
|-----|------|

|                     |
|---------------------|
| Date and Time       |
| 16/05/2022 20:26:08 |



## AS-ISK v2

| Taxon and Assessor details         |                                                                                                                                 |
|------------------------------------|---------------------------------------------------------------------------------------------------------------------------------|
| Category                           | Fishes and Lampreys (freshwater)                                                                                                |
| Taxon name                         | <i>Oncorhynchus mykiss</i>                                                                                                      |
| Common name                        | rainbow trout                                                                                                                   |
| Assessor                           | Giorgi Epitashvili                                                                                                              |
| Risk screening context             |                                                                                                                                 |
| Reason and socio-economic benefits | O. mykiss is one of the widespread species in the world and is widely used in aquaculture                                       |
| Risk assessment area               | South Caucasus                                                                                                                  |
| Taxonomy                           | Oncorhynchus mykiss (Walbaum 1792)                                                                                              |
| Native range                       | Pacific Slope from Kuskokwim River drainage in Alaska to Otago River drainage in California, USA                                |
| Introduced range                   | Widely introduced and established in Canada and USA, including Arctic, Atlantic, Great Lakes,                                   |
| URL                                | <a href="https://www.fishbase.se/summary/oncorhynchus-mykiss.html">https://www.fishbase.se/summary/oncorhynchus-mykiss.html</a> |

|                                                |      |                                                                                                                                                                         | Response | Justification (references and/or other information)                                                                                                                                                                                                                                                                                                                                                                                                                                                                                                                                                                                                                                    | Confidence |
|------------------------------------------------|------|-------------------------------------------------------------------------------------------------------------------------------------------------------------------------|----------|----------------------------------------------------------------------------------------------------------------------------------------------------------------------------------------------------------------------------------------------------------------------------------------------------------------------------------------------------------------------------------------------------------------------------------------------------------------------------------------------------------------------------------------------------------------------------------------------------------------------------------------------------------------------------------------|------------|
| A. Biogeography/Historical                     |      |                                                                                                                                                                         |          |                                                                                                                                                                                                                                                                                                                                                                                                                                                                                                                                                                                                                                                                                        |            |
| 1. Domestication/Cultivation                   |      |                                                                                                                                                                         |          |                                                                                                                                                                                                                                                                                                                                                                                                                                                                                                                                                                                                                                                                                        |            |
| 1                                              | 1.01 | Has the taxon been the subject of domestication (or cultivation) for at least 20 generations?                                                                           | Yes      | This fish is important for pond fishery (Ninua et al. 2013)                                                                                                                                                                                                                                                                                                                                                                                                                                                                                                                                                                                                                            | Very high  |
| 2                                              | 1.02 | Is the taxon harvested in the wild and likely to be sold or used in its live form?                                                                                      | Yes      | This species is one of the commercial fish and actively used for both aquacultural and recreational fishing.                                                                                                                                                                                                                                                                                                                                                                                                                                                                                                                                                                           | Very high  |
| 3                                              | 1.03 | Does the taxon have invasive races, varieties, sub-taxa or congeners?                                                                                                   | Yes      | It has been widely introduced around the world for fisheries and aquaculture. It is an effective competitor which can displace native trout species when introduced into new environments. Several countries report adverse ecological impact after                                                                                                                                                                                                                                                                                                                                                                                                                                    | Very high  |
| 2. Climate, distribution and introduction risk |      |                                                                                                                                                                         |          |                                                                                                                                                                                                                                                                                                                                                                                                                                                                                                                                                                                                                                                                                        |            |
| 4                                              | 2.01 | How similar are the climatic conditions of the Risk Assessment (RA) area and the taxon's native range?                                                                  | Medium   | Köppen-Geiger climate classification system                                                                                                                                                                                                                                                                                                                                                                                                                                                                                                                                                                                                                                            | Medium     |
| 5                                              | 2.02 | What is the quality of the climate matching data?                                                                                                                       | #N/A     | No data                                                                                                                                                                                                                                                                                                                                                                                                                                                                                                                                                                                                                                                                                | Low        |
| 6                                              | 2.03 | Is the taxon already present outside of captivity in the RA area?                                                                                                       | Yes      | This species often escapes from fish farms and occurs in many rivers and lakes of the SC region (Ninua et al. 2013). For instance in Georgia <i>O. mykiss</i> often seen in rivers where fish farms are                                                                                                                                                                                                                                                                                                                                                                                                                                                                                | Very high  |
| 7                                              | 2.04 | How many potential vectors could the taxon use to enter in the RA area?                                                                                                 | One      | This species entered in the SC region intentionally by humans for aquaculture.                                                                                                                                                                                                                                                                                                                                                                                                                                                                                                                                                                                                         | High       |
| 8                                              | 2.05 | Is the taxon currently found in close proximity to, and likely to enter into, the RA area in the near future (e.g. unintentional and intentional introductions)?        | Yes      | Rainbow trout ( <i>Oncorhynchus mykiss</i> ) has become by far the most frequently farmed freshwater fish species in Turkey, whereas very little is known about its establishment and invasiveness potential (Yođurtcuođlu et al. 2021).                                                                                                                                                                                                                                                                                                                                                                                                                                               | Very high  |
| 3. Invasive elsewhere                          |      |                                                                                                                                                                         |          |                                                                                                                                                                                                                                                                                                                                                                                                                                                                                                                                                                                                                                                                                        |            |
| 9                                              | 3.01 | Has the taxon become naturalised (established viable populations) outside its native range?                                                                             | Yes      | Introductions of rainbow trout in European waters have been encouraged for many years and intentional releases still occur. Our study demonstrated that, in some cases, <i>O. mykiss</i> can constitute self-sustaining, stable populations, able to survive over a long time period and to colonise areas that naturally lack other salmonids. The ability to create naturally reproducing populations may represent a local threat to the rich biological diversity of the                                                                                                                                                                                                           | Very high  |
| 10                                             | 3.02 | In the taxon's introduced range, are there known adverse impacts to wild stocks or commercial taxa?                                                                     | Yes      | In the experiment, to test whether rainbow trout is a vector of the pathogenic freshwater mold <i>Saprolegnia diclina</i> (Oomycetes), eggs of <i>Engystomops petersi</i> were placed with infected and uninfected rainbow trout. There was a high mortality rate in the embryos of <i>E. petersi</i> exposed to trout infected with <i>S. diclina</i> . This represents the first evidence that rainbow trout may have a direct negative effect on Neotropical amphibian populations, and thus should be considered a threat. Management programs should be implemented to eradicate trout from Andean rivers, especially in areas with high number of endangered amphibians (Martín- | High       |
| 11                                             | 3.03 | In the taxon's introduced range, are there known adverse impacts to aquaculture?                                                                                        | No       | No data                                                                                                                                                                                                                                                                                                                                                                                                                                                                                                                                                                                                                                                                                | Low        |
| 12                                             | 3.04 | In the taxon's introduced range, are there known adverse impacts to ecosystem services?                                                                                 | No       | Several invasives have provided positive recreation and tourism opportunities, especially in the area of fishing. These include large mouth bass ( <i>Micropterus salmoides</i> ), brown trout ( <i>Salmo trutta</i> ) and rainbow trout ( <i>Oncorhynchus mykiss</i> ) (Charles and Dukes                                                                                                                                                                                                                                                                                                                                                                                             | High       |
| 13                                             | 3.05 | In the taxon's introduced range, are there known adverse socio-economic impacts?                                                                                        | No       | Several invasives have provided positive recreation and tourism opportunities, especially in the area of fishing. These include large mouth bass ( <i>Micropterus salmoides</i> ), brown trout ( <i>Salmo trutta</i> ) and rainbow trout ( <i>Oncorhynchus mykiss</i> ) (Charles and Dukes                                                                                                                                                                                                                                                                                                                                                                                             | High       |
| B. Biology/Ecology                             |      |                                                                                                                                                                         |          |                                                                                                                                                                                                                                                                                                                                                                                                                                                                                                                                                                                                                                                                                        |            |
| 4. Undesirable (or persistence) traits         |      |                                                                                                                                                                         |          |                                                                                                                                                                                                                                                                                                                                                                                                                                                                                                                                                                                                                                                                                        |            |
| 14                                             | 4.01 | Is it likely that the taxon will be poisonous or pose other risks to human health?                                                                                      | No       | This species does not pose a threat to humans.                                                                                                                                                                                                                                                                                                                                                                                                                                                                                                                                                                                                                                         | Very high  |
| 15                                             | 4.02 | Is it likely that the taxon will smother one or more native taxa (that are not threatened or protected)?                                                                | Yes      | This fish is predator and can affect on native taxa                                                                                                                                                                                                                                                                                                                                                                                                                                                                                                                                                                                                                                    | Medium     |
| 16                                             | 4.03 | Are there any threatened or protected taxa that the non-native taxon would parasitise in the RA area?                                                                   | Yes      | This fish is predator and can eat threatened or protected taxa in the SC region such as Sturgeons, trouts, etc.                                                                                                                                                                                                                                                                                                                                                                                                                                                                                                                                                                        | High       |
| 17                                             | 4.04 | Is the taxon adaptable in terms of climatic and other environmental conditions, thus enhancing its potential persistence if it has invaded or could invade the RA area? | Yes      | This species has been found in the region for a long time and it seems that the climatic and environmental conditions here are acceptable to it.                                                                                                                                                                                                                                                                                                                                                                                                                                                                                                                                       | Medium     |

|                                 |      |                                                                                                                                                                 |                |                                                                                                                                                                                                                                                                                                                                                                                                                                                                                                                                                                                         |           |
|---------------------------------|------|-----------------------------------------------------------------------------------------------------------------------------------------------------------------|----------------|-----------------------------------------------------------------------------------------------------------------------------------------------------------------------------------------------------------------------------------------------------------------------------------------------------------------------------------------------------------------------------------------------------------------------------------------------------------------------------------------------------------------------------------------------------------------------------------------|-----------|
| 18                              | 4.05 | Is the taxon likely to disrupt food-web structure/function in aquatic ecosystems if it has invaded or is likely to invade the RA area?                          | Yes            | O. mykiss is an predator fish and can disrupt food web structure in the region because it can eat local small sized species. Also this species is competitor to native trout populations (e.g. Salmo caspius, S. ciscaucasicus, S. labrax, S. rizeensis) and consequently negatively affects mountain river ecosystems. Such a fact is known from other regions as well (Juncos et al. 2011).                                                                                                                                                                                           | Medium    |
| 19                              | 4.06 | Is the taxon likely to exert adverse impacts on ecosystem services in the RA area?                                                                              | No             | A similar study has not yet been conducted, although it may have some impact.                                                                                                                                                                                                                                                                                                                                                                                                                                                                                                           | Medium    |
| 20                              | 4.07 | Is it likely that the taxon will host, and/or act as a vector for, recognised pests and infectious agents that are endemic in the RA area?                      | Not applicable | No data                                                                                                                                                                                                                                                                                                                                                                                                                                                                                                                                                                                 | Low       |
| 21                              | 4.08 | Is it likely that the taxon will host, and/or act as a vector for, recognised pests and infectious agents that are absent from (novel to) the RA area?          | Not applicable | No data                                                                                                                                                                                                                                                                                                                                                                                                                                                                                                                                                                                 | Low       |
| 22                              | 4.09 | Is it likely that the taxon will achieve a body size that will make it more likely to be released from captivity?                                               | Yes            | This fish has been widely introduced around the world for fisheries and aquaculture. The rearing of captive rainbow trout for fish farming and stock enhancement programmes mimics the life history of wild Oncorhynchus mykiss and utilises both freshwater and sea water environments as appropriate. Because of the efficiencies of farm husbandry practices, the farming process accelerates the life cycle to 1 year or less in freshwater (smolts typically 40g to 120g) and harvesting is done after 10 to 20 months of growth in sea cages at between 2 and 6kg in body weight. | Very high |
| 23                              | 4.10 | Is the taxon capable of sustaining itself in a range of water velocity conditions (e.g. versatile in habitat use)?                                              | Yes            | This species inhabit clear, cold headwaters, creeks, small to large rivers, lakes, and intertidal areas (Page and Burr 2011)                                                                                                                                                                                                                                                                                                                                                                                                                                                            | High      |
| 24                              | 4.11 | Is it likely that the taxon's mode of existence (e.g. excretion of by-products) or behaviours (e.g. feeding) will reduce habitat quality for native taxa?       | Yes            | A similar study has not yet been conducted                                                                                                                                                                                                                                                                                                                                                                                                                                                                                                                                              | Medium    |
| 25                              | 4.12 | Is the taxon likely to maintain a viable population even when present in low densities (or persisting in adverse conditions by way of a dormant form)?          | Not applicable | No data                                                                                                                                                                                                                                                                                                                                                                                                                                                                                                                                                                                 | Low       |
| <b>5. Resource exploitation</b> |      |                                                                                                                                                                 |                |                                                                                                                                                                                                                                                                                                                                                                                                                                                                                                                                                                                         |           |
| 26                              | 5.01 | Is the taxon likely to consume threatened or protected native taxa in the RA area?                                                                              | Yes            | This species is predator and can eat many native species in the SC region, including threatened and protected species.                                                                                                                                                                                                                                                                                                                                                                                                                                                                  | High      |
| 27                              | 5.02 | Is the taxon likely to sequester food resources (including nutrients) to the detriment of native taxa in the RA area?                                           | Yes            | O. mykiss is competitor species for native taxa                                                                                                                                                                                                                                                                                                                                                                                                                                                                                                                                         | High      |
| <b>6. Reproduction</b>          |      |                                                                                                                                                                 |                |                                                                                                                                                                                                                                                                                                                                                                                                                                                                                                                                                                                         |           |
| 28                              | 6.01 | Is the taxon likely to exhibit parental care and/or to reduce age-at-maturity in response to environmental conditions?                                          | Not applicable | No data                                                                                                                                                                                                                                                                                                                                                                                                                                                                                                                                                                                 | Low       |
| 29                              | 6.02 | Is the taxon likely to produce viable gametes or propagules (in the RA area)?                                                                                   | No             | No such case has been confirmed yet                                                                                                                                                                                                                                                                                                                                                                                                                                                                                                                                                     | Low       |
| 30                              | 6.03 | Is the taxon likely to hybridise naturally with native taxa?                                                                                                    | Yes            | Hybridization between native and non-native species has serious biological consequences, but our understanding of how dispersal and selection interact to influence invasive hybridization is limited. Here, we document the spread of genetic introgression between a native (Oncorhynchus clarkii) and invasive (Oncorhynchus mykiss) trout, and identify the mechanisms influencing genetic admixture (Kovach et al. 2015).                                                                                                                                                          | Very high |
| 31                              | 6.04 | Is the taxon likely to be hermaphroditic or to display asexual reproduction?                                                                                    | No             | No data                                                                                                                                                                                                                                                                                                                                                                                                                                                                                                                                                                                 | Low       |
| 32                              | 6.05 | Is the taxon dependent on the presence of another taxon (or specific habitat features) to complete its life cycle?                                              | No             | Such data is not available                                                                                                                                                                                                                                                                                                                                                                                                                                                                                                                                                              | Medium    |
| 33                              | 6.06 | Is the taxon known (or likely) to produce a large number of propagules or offspring within a short time span (e.g. < 1 year)?                                   | No             | The fish becomes sexually mature at the age of 3-4, Fecundity - 500-2500 eggs (Ninua et al. 2013).                                                                                                                                                                                                                                                                                                                                                                                                                                                                                      | High      |
| 34                              | 6.07 | How many time units (days, months, years) does the taxon require to reach the age-at-first-reproduction?                                                        | 3              | The fish becomes sexually mature at the age of 3-4 (Ninua et al. 2013).                                                                                                                                                                                                                                                                                                                                                                                                                                                                                                                 | Very high |
| <b>7. Dispersal mechanisms</b>  |      |                                                                                                                                                                 |                |                                                                                                                                                                                                                                                                                                                                                                                                                                                                                                                                                                                         |           |
| 35                              | 7.01 | How many potential internal vectors/pathways could the taxon use to disperse within the RA area (with suitable vectors)?                                        | One            | This species may spread accidentally as a result of escaping from fish farms.                                                                                                                                                                                                                                                                                                                                                                                                                                                                                                           | Medium    |
| 36                              | 7.02 | Will any of these vectors/pathways bring the taxon in close proximity to one or more protected areas (e.g. MCZ, MPA, SSSI)?                                     | Yes            | This species has wide range in the SC region and probably distributed in the protected areas or nearby.                                                                                                                                                                                                                                                                                                                                                                                                                                                                                 | Medium    |
| 37                              | 7.03 | Does the taxon have a means of actively attaching itself to hard substrata (e.g. ship hulls, pilings, buoys) such that it enhances the likelihood of dispersal? | No             | This fish does not have such means                                                                                                                                                                                                                                                                                                                                                                                                                                                                                                                                                      | High      |
| 38                              | 7.04 | Is natural dispersal of the taxon likely to occur as eggs (for animals) or as propagules (for plants: seeds, spores) in the RA area?                            | No             | It is believed that this species can not reproduce naturally in the Caucasus region.                                                                                                                                                                                                                                                                                                                                                                                                                                                                                                    | Low       |
| 39                              | 7.05 | Is natural dispersal of the taxon likely to occur as larvae/juveniles (for animals) or as fragments/seedlings (for plants) in the RA area?                      | No             | This species can not reproduce naturally in the Caucasus region                                                                                                                                                                                                                                                                                                                                                                                                                                                                                                                         | Low       |
| 40                              | 7.06 | Are older life stages of the taxon likely to migrate in the RA area for reproduction?                                                                           | Yes            | This species has migratory form which is living in the Black Sea and enters in the rivers of western Georgia (Own data)                                                                                                                                                                                                                                                                                                                                                                                                                                                                 | High      |

|                                |      |                                                                                                                                                                                           |           |                                                                                                                                                                                                                                                                                                                                                                                                  |      |
|--------------------------------|------|-------------------------------------------------------------------------------------------------------------------------------------------------------------------------------------------|-----------|--------------------------------------------------------------------------------------------------------------------------------------------------------------------------------------------------------------------------------------------------------------------------------------------------------------------------------------------------------------------------------------------------|------|
| 41                             | 7.07 | Are propagules or eggs of the taxon likely to be dispersed in the RA area by other animals?                                                                                               | No        | No such fact has been revealed                                                                                                                                                                                                                                                                                                                                                                   | Low  |
| 42                             | 7.08 | Is dispersal of the taxon along any of the vectors/pathways mentioned in the previous seven questions (35–41; i.e. both unintentional or intentional) likely to be                        | No        | No data                                                                                                                                                                                                                                                                                                                                                                                          | Low  |
| 43                             | 7.09 | Is dispersal of the taxon density dependent?                                                                                                                                              | No        | No data                                                                                                                                                                                                                                                                                                                                                                                          | Low  |
| <b>8. Tolerance attributes</b> |      |                                                                                                                                                                                           |           |                                                                                                                                                                                                                                                                                                                                                                                                  |      |
| 44                             | 8.01 | Is the taxon able to withstand being out of water for extended periods (e.g. minimum of one or more hours) at some stage of its life cycle?                                               | No        | This fish inhabits clear, oxygen rich cold waters, creeks, small to large rivers, lakes, and intertidal areas (Page and Burr 2011)                                                                                                                                                                                                                                                               | High |
| 45                             | 8.02 | Is the taxon tolerant of a wide range of water quality conditions relevant to that taxon? [In the Justification field, indicate the relevant water quality variable(s) being considered.] | No        | Water temperature was an important factor in trout distribution in the two pools of Southern California. During 1–11 August 1994, water temperatures in pool 1 ranged from 21.5) C at the bottom (4.1 m) to 28.9) C at the surface. After 5 August, trout were no longer found in this pool, suggesting that trout had moved out of the high temperature water or died (Matthews and Berg 1997). | High |
| 46                             | 8.03 | Can the taxon be controlled or eradicated in the wild with chemical, biological, or other agents/means?                                                                                   | Yes       | A similar study has not yet been conducted                                                                                                                                                                                                                                                                                                                                                       | Low  |
| 47                             | 8.04 | Is the taxon likely to tolerate or benefit from environmental/human disturbance?                                                                                                          | Yes       | This species is spread from fishing farms as a result of floods or other factors.                                                                                                                                                                                                                                                                                                                | High |
| 48                             | 8.05 | Is the taxon able to tolerate salinity levels that are higher or lower than those found in its usual environment?                                                                         | Yes       | Anadromous forms are living in the coastal streams (Page and Burr 1991).                                                                                                                                                                                                                                                                                                                         | High |
| 49                             | 8.06 | Are there effective natural enemies (predators) of the taxon present in the RA                                                                                                            | Yes       | There are several predators which can eat O. mykiss: birds, reptiles, fish (Esox lucius, Squalius spp, Salmo spp, etc).                                                                                                                                                                                                                                                                          | High |
| <b>C. Climate change</b>       |      |                                                                                                                                                                                           |           |                                                                                                                                                                                                                                                                                                                                                                                                  |      |
| <b>9. Climate change</b>       |      |                                                                                                                                                                                           |           |                                                                                                                                                                                                                                                                                                                                                                                                  |      |
| 50                             | 9.01 | Under the predicted future climatic conditions, are the risks of entry into the RA area posed by the taxon likely to increase, decrease or not change?                                    | No change | Own judgement                                                                                                                                                                                                                                                                                                                                                                                    | Low  |
| 51                             | 9.02 | Under the predicted future climatic conditions, are the risks of establishment posed by the taxon likely to increase, decrease or not change?                                             | No change | Own judgement                                                                                                                                                                                                                                                                                                                                                                                    | Low  |
| 52                             | 9.03 | Under the predicted future climatic conditions, are the risks of dispersal within the RA area posed by the taxon likely to increase, decrease or not change?                              | No change | Own judgement                                                                                                                                                                                                                                                                                                                                                                                    | Low  |
| 53                             | 9.04 | Under the predicted future climatic conditions, what is the likely magnitude of future potential impacts on biodiversity and/or ecological integrity/status?                              | No change | Own observation                                                                                                                                                                                                                                                                                                                                                                                  | Low  |
| 54                             | 9.05 | Under the predicted future climatic conditions, what is the likely magnitude of future potential impacts on ecosystem structure and/or function?                                          | No change | Own observation                                                                                                                                                                                                                                                                                                                                                                                  | Low  |
| 55                             | 9.06 | Under the predicted future climatic conditions, what is the likely magnitude of future potential impacts on ecosystem services/socio-economic factors?                                    | Lower     | Own observation                                                                                                                                                                                                                                                                                                                                                                                  | Low  |

| Statistics                                     |             |
|------------------------------------------------|-------------|
| Scores                                         |             |
| <b>BRA</b>                                     | <b>19.0</b> |
| <b>BRA Outcome</b>                             | <b>-</b>    |
| <b>BRA+CCA</b>                                 | <b>17.0</b> |
| <b>BRA+CCA Outcome</b>                         | <b>-</b>    |
| Score partition                                |             |
| <b>A. Biogeography/Historical</b>              | <b>5.0</b>  |
| 1. Domestication/Cultivation                   | 4.0         |
| 2. Climate, distribution and introduction risk | 1.0         |
| 3. Invasive elsewhere                          | 0.0         |
| <b>B. Biology/Ecology</b>                      | <b>14.0</b> |
| 4. Undesirable (or persistence) traits         | 7.0         |
| 5. Resource exploitation                       | 7.0         |
| 6. Reproduction                                | 1.0         |
| 7. Dispersal mechanisms                        | -2.0        |
| 8. Tolerance attributes                        | 1.0         |
| <b>C. Climate change</b>                       | <b>-2.0</b> |
| 9. Climate change                              | -2.0        |
| Answered Questions                             |             |
| <b>Total</b>                                   | <b>55</b>   |
| <b>A. Biogeography/Historical</b>              | <b>13</b>   |
| 1. Domestication/Cultivation                   | 3           |
| 2. Climate, distribution and introduction risk | 5           |
| 3. Invasive elsewhere                          | 5           |
| <b>B. Biology/Ecology</b>                      | <b>36</b>   |
| 4. Undesirable (or persistence) traits         | 12          |
| 5. Resource exploitation                       | 2           |
| 6. Reproduction                                | 7           |
| 7. Dispersal mechanisms                        | 9           |

|                                       |          |
|---------------------------------------|----------|
| 8. Tolerance attributes               | 6        |
| <b>C. Climate change</b>              | <b>6</b> |
| 9. Climate change                     | 6        |
| <b>Sectors affected</b>               |          |
| Commercial                            | 2        |
| Environmental                         | 8        |
| Species or population nuisance traits | 9        |

|                   |      |
|-------------------|------|
| <b>Thresholds</b> |      |
| BRA               | -    |
| BRA+CCA           | -    |
| <b>Confidence</b> |      |
| BRA+CCA           | 0.57 |
| BRA               | 0.61 |
| CCA               | 0.25 |

|                      |                     |
|----------------------|---------------------|
| <b>Date and Time</b> |                     |
|                      | 13/05/2022 14:28:27 |

## AS-ISK v2

| Taxon and Assessor details         |                                                                                                                                 |
|------------------------------------|---------------------------------------------------------------------------------------------------------------------------------|
| Category                           | Fishes and Lampreys (freshwater)                                                                                                |
| Taxon name                         | <i>Oncorhynchus mykiss</i>                                                                                                      |
| Common name                        | rainbow trout                                                                                                                   |
| Assessor                           | Tatia Kuljanishvili                                                                                                             |
| Risk screening context             |                                                                                                                                 |
| Reason and socio-economic benefits | Recreational fisheries favourite object                                                                                         |
| Risk assessment area               | South Caucasus                                                                                                                  |
| Taxonomy                           | Salmoniformes (Salmons) Salmonidae (Salmonids) Salmoninae                                                                       |
| Native range                       | native to the North America from Pacific basin to northern Mexico, also native from Kamchatka to                                |
| Introduced range                   | Canada and USA, including Arctic, Atlantic, Great Lakes, Mississippi River, and Rio Grande basins,                              |
| URL                                | <a href="https://www.fishbase.de/summary/Oncorhynchus-mykiss.html">https://www.fishbase.de/summary/Oncorhynchus-mykiss.html</a> |

|                                                |      |                                                                                                                                                                         | Response | Justification (references and/or other information)                                                                                                                                                                                                                                                                                                                                                                                                                         | Confidence |
|------------------------------------------------|------|-------------------------------------------------------------------------------------------------------------------------------------------------------------------------|----------|-----------------------------------------------------------------------------------------------------------------------------------------------------------------------------------------------------------------------------------------------------------------------------------------------------------------------------------------------------------------------------------------------------------------------------------------------------------------------------|------------|
| A. Biogeography/Historical                     |      |                                                                                                                                                                         |          |                                                                                                                                                                                                                                                                                                                                                                                                                                                                             |            |
| 1. Domestication/Cultivation                   |      |                                                                                                                                                                         |          |                                                                                                                                                                                                                                                                                                                                                                                                                                                                             |            |
| 1                                              | 1.01 | Has the taxon been the subject of domestication (or cultivation) for at least 20 generations?                                                                           | Yes      | O. mykiss is a trade important fish that spawns easy, fast growing and quite adaptable to different environments. it easily adapts to an artificial diet. can be bread in aquaculture facilities as well as natural water bodies such as lakes. the production of O. mykiss has drasticallygrown since 1950s (More at: <a href="http://www.fao.org/fishery/culturedspecies/Oncorhynchus_mykiss/en">http://www.fao.org/fishery/culturedspecies/Oncorhynchus_mykiss/en</a> ). | Very high  |
| 2                                              | 1.02 | Is the taxon harvested in the wild and likely to be sold or used in its live form?                                                                                      | Yes      | Artificially spawned O. mykiss can be sold as fertilized eggs of fry.                                                                                                                                                                                                                                                                                                                                                                                                       | Very high  |
| 3                                              | 1.03 | Does the taxon have invasive races, varieties, sub-taxa or congeners?                                                                                                   | Yes      | Examples: golden trout, brook trout, brown trout (Knapp 1996).                                                                                                                                                                                                                                                                                                                                                                                                              | Very high  |
| 2. Climate, distribution and introduction risk |      |                                                                                                                                                                         |          |                                                                                                                                                                                                                                                                                                                                                                                                                                                                             |            |
| 4                                              | 2.01 | How similar are the climatic conditions of the Risk Assessment (RA) area and the taxon's native range?                                                                  | Medium   | After running Climatch between the native range and South Caucasian countries the software calculates most parts as similar climate, however the maximum similarity is 7 out of 10.                                                                                                                                                                                                                                                                                         | Medium     |
| 5                                              | 2.02 | What is the quality of the climate matching data?                                                                                                                       | Medium   | The data is of medium quality.                                                                                                                                                                                                                                                                                                                                                                                                                                              | Medium     |
| 6                                              | 2.03 | Is the taxon already present outside of captivity in the RA area?                                                                                                       | Yes      | Besides intentional releases from amateur fishermen, O. mykiss is being stocked in the lakes of high altitude areas.                                                                                                                                                                                                                                                                                                                                                        | Very high  |
| 7                                              | 2.04 | How many potential vectors could the taxon use to enter in the RA area?                                                                                                 | >1       | Recreational fisheries, aquaculture, natural dispersal.                                                                                                                                                                                                                                                                                                                                                                                                                     | Very high  |
| 8                                              | 2.05 | Is the taxon currently found in close proximity to, and likely to enter into, the RA area in the near future (e.g. unintentional and intentional introductions)?        | Yes      | This fish is distributed all over RA.                                                                                                                                                                                                                                                                                                                                                                                                                                       | Very high  |
| 3. Invasive elsewhere                          |      |                                                                                                                                                                         |          |                                                                                                                                                                                                                                                                                                                                                                                                                                                                             |            |
| 9                                              | 3.01 | Has the taxon become naturalised (established viable populations) outside its                                                                                           | Yes      | In some places this species have become naturalised (for example Quebec Canada Thibault 2010).                                                                                                                                                                                                                                                                                                                                                                              | High       |
| 10                                             | 3.02 | In the taxon's introduced range, are there known adverse impacts to wild stocks or commercial taxa?                                                                     | Yes      | Can hybridize with native trouts and compete for resources and spawning rounds.                                                                                                                                                                                                                                                                                                                                                                                             | Medium     |
| 11                                             | 3.03 | In the taxon's introduced range, are there known adverse impacts to aquaculture?                                                                                        | No       | No adverse impacts on aquaculture is known.                                                                                                                                                                                                                                                                                                                                                                                                                                 | Medium     |
| 12                                             | 3.04 | In the taxon's introduced range, are there known adverse impacts to ecosystem                                                                                           | Yes      | Can be transmitting the diseases and disrupt nutrient cycle.                                                                                                                                                                                                                                                                                                                                                                                                                | Medium     |
| 13                                             | 3.05 | In the taxon's introduced range, are there known adverse socio-economic impacts?                                                                                        | No       | No dramatic changes are known.                                                                                                                                                                                                                                                                                                                                                                                                                                              | Low        |
| B. Biology/Ecology                             |      |                                                                                                                                                                         |          |                                                                                                                                                                                                                                                                                                                                                                                                                                                                             |            |
| 4. Undesirable (or persistence) traits         |      |                                                                                                                                                                         |          |                                                                                                                                                                                                                                                                                                                                                                                                                                                                             |            |
| 14                                             | 4.01 | Is it likely that the taxon will be poisonous or pose other risks to human health?                                                                                      | No       | Is not poisonous and does not pose risk to human health.                                                                                                                                                                                                                                                                                                                                                                                                                    | Very high  |
| 15                                             | 4.02 | Is it likely that the taxon will smother one or more native taxa (that are not threatened or protected)?                                                                | Yes      | Introduced trout are affecting the distribution of a wide range of native aquatic species including native fishes, amphibians, zooplankton, and benthic macroinvertebrates in terms of predation, competition.                                                                                                                                                                                                                                                              | High       |
| 16                                             | 4.03 | Are there any threatened or protected taxa that the non-native taxon would parasitise in the RA area?                                                                   | No       | Does not parasite.                                                                                                                                                                                                                                                                                                                                                                                                                                                          | Very high  |
| 17                                             | 4.04 | Is the taxon adaptable in terms of climatic and other environmental conditions, thus enhancing its potential persistence if it has invaded or could invade the RA area? | No       | It can be stocked in rivers and lakes which are rich with oxygen. It may not survive in the places where temperatures are higher than 25 degrees Celsius and low oxygen.                                                                                                                                                                                                                                                                                                    | Low        |
| 18                                             | 4.05 | Is the taxon likely to disrupt food-web structure/function in aquatic ecosystems if it has invaded or is likely to invade the RA                                        | Yes      | It can shape native fish community as well as amphibians, zooplankton and benthic macroinvertebrates.                                                                                                                                                                                                                                                                                                                                                                       | High       |
| 19                                             | 4.06 | Is the taxon likely to exert adverse impacts on ecosystem services in the RA area?                                                                                      | No       | Less likely.                                                                                                                                                                                                                                                                                                                                                                                                                                                                | High       |
| 20                                             | 4.07 | Is it likely that the taxon will host, and/or act as a vector for, recognised pests and infectious agents that are endemic in the RA                                    | No       | No such information available.                                                                                                                                                                                                                                                                                                                                                                                                                                              | Medium     |
| 21                                             | 4.08 | Is it likely that the taxon will host, and/or act as a vector for, recognised pests and infectious agents that are absent from (novel to) the RA area?                  | Yes      | Likely, yes.                                                                                                                                                                                                                                                                                                                                                                                                                                                                | Medium     |
| 22                                             | 4.09 | Is it likely that the taxon will achieve a body size that will make it more likely to be released from captivity?                                                       | Yes      | Yes. See: <a href="https://www.fishbase.de/summary/Oncorhynchus-mykiss.html">https://www.fishbase.de/summary/Oncorhynchus-mykiss.html</a>                                                                                                                                                                                                                                                                                                                                   | High       |

|                                 |      |                                                                                                                                                                              |     |                                                                                                                                                                                                                                                |           |
|---------------------------------|------|------------------------------------------------------------------------------------------------------------------------------------------------------------------------------|-----|------------------------------------------------------------------------------------------------------------------------------------------------------------------------------------------------------------------------------------------------|-----------|
| 23                              | 4.10 | Is the taxon capable of sustaining itself in a range of water velocity conditions (e.g. versatile in habitat use)?                                                           | Yes | It can persist in both, standing and flowing rivers and lakes and the anadromous behaviour of the fish facilitates its dispersal upstreams.                                                                                                    | High      |
| 24                              | 4.11 | Is it likely that the taxon's mode of existence (e.g. excretion of by-products) or behaviours (e.g. feeding) will reduce habitat quality for native taxa?                    | No  | No information available                                                                                                                                                                                                                       | Medium    |
| 25                              | 4.12 | Is the taxon likely to maintain a viable population even when present in low densities (or persisting in adverse conditions by way of a dormant form)?                       | No  | Most likely no.                                                                                                                                                                                                                                | Medium    |
| <b>5. Resource exploitation</b> |      |                                                                                                                                                                              |     |                                                                                                                                                                                                                                                |           |
| 26                              | 5.01 | Is the taxon likely to consume threatened or protected native taxa in the RA area?                                                                                           | Yes | Can affect endangered benthic invertebrates and fish fry.                                                                                                                                                                                      | High      |
| 27                              | 5.02 | Is the taxon likely to sequester food resources (including nutrients) to the detriment of native taxa in the RA area?                                                        | Yes | Possibly, yes.                                                                                                                                                                                                                                 | Medium    |
| <b>6. Reproduction</b>          |      |                                                                                                                                                                              |     |                                                                                                                                                                                                                                                |           |
| 28                              | 6.01 | Is the taxon likely to exhibit parental care and/or to reduce age-at-maturity in response to environmental conditions?                                                       | No  | Not known <a href="https://www.fishbase.de/summary/Oncorhynchus-mykiss.html">https://www.fishbase.de/summary/Oncorhynchus-mykiss.html</a>                                                                                                      | High      |
| 29                              | 6.02 | Is the taxon likely to produce viable gametes or propagules (in the RA area)?                                                                                                | No  | Not likely.                                                                                                                                                                                                                                    | High      |
| 30                              | 6.03 | Is the taxon likely to hybridise naturally with native taxa?                                                                                                                 | Yes | Yes. for instance with cutthroat trout ( <i>Oncorhynchus clarkii</i> )                                                                                                                                                                         | High      |
| 31                              | 6.04 | Is the taxon likely to be hermaphroditic or to display asexual reproduction?                                                                                                 | No  | No. Does not display asexual reproduction                                                                                                                                                                                                      | High      |
| 32                              | 6.05 | Is the taxon dependent on the presence of another taxon (or specific habitat features) to complete its life cycle?                                                           | No  | No. See: <a href="https://www.fishbase.de/summary/Oncorhynchus-mykiss.html">https://www.fishbase.de/summary/Oncorhynchus-mykiss.html</a>                                                                                                       | High      |
| 33                              | 6.06 | Is the taxon known (or likely) to produce a large number of propagules or offspring within a short time span (e.g. < 1 year)?                                                | No  | Spawning happens from November until May in the Northern hemisphere and from August to November on the Southern hemisphere with female producing 700 to 4000 eggs.                                                                             | Medium    |
| 34                              | 6.07 | How many time units (days, months, years) does the taxon require to reach the age-at-first-reproduction?                                                                     | 3   | Males mature generally at 2 years and females at 3.                                                                                                                                                                                            | Very high |
| <b>7. Dispersal mechanisms</b>  |      |                                                                                                                                                                              |     |                                                                                                                                                                                                                                                |           |
| 35                              | 7.01 | How many potential internal vectors/pathways could the taxon use to disperse within the RA area (with suitable protected areas (e.g. MCZ, MPA, SSSI)?                        | >1  | Stocking in natural waters, Accidental escapes from fish farms, intentional releases (by hobbyists).                                                                                                                                           | Very high |
| 36                              | 7.02 | Will any of these vectors/pathways bring the taxon in close proximity to one or more protected areas (e.g. MCZ, MPA, SSSI)?                                                  | Yes | Active stocking and releases plus the species ability to overcome different velocities brings in close proximities to protected areas in RA.                                                                                                   | High      |
| 37                              | 7.03 | Does the taxon have a means of actively attaching itself to hard substrata (e.g. ship hulls, pilings, buoys) such that it enhances the likelihood of dispersal?              | No  | No. Morphologically this species does not have a means of actively attaching itself to hard substrata                                                                                                                                          | High      |
| 38                              | 7.04 | Is natural dispersal of the taxon likely to occur as eggs (for animals) or as propagules (for plants: seeds, spores) in the RA area?                                         | No  | Natural dispersal can not occur as eggs because, this species struggles to spawn independently in RA.                                                                                                                                          | High      |
| 39                              | 7.05 | Is natural dispersal of the taxon likely to occur as larvae/juveniles (for animals) or as fragments/seedlings (for plants) in the RA area?                                   | Yes | Juveniles of <i>O. mykiss</i> can be released into waters by fishermen, and it is mostly the reason of its dispersal in the RA.                                                                                                                | High      |
| 40                              | 7.06 | Are older life stages of the taxon likely to migrate in the RA area for reproduction?                                                                                        | Yes | This is an anadromous species. Even though it can migrate, it is still not documented that this species can spawn themselves in RA. For this reason, the confidence level of this answer is Low.                                               | Low       |
| 41                              | 7.07 | Are propagules or eggs of the taxon likely to be dispersed in the RA area by other animals?                                                                                  | No  | No. Can not be dispersed by other animals                                                                                                                                                                                                      | High      |
| 42                              | 7.08 | Is dispersal of the taxon along any of the vectors/pathways mentioned in the previous seven questions (35–41; i.e. both unintentional or intentional) likely to be           | Yes | All the above mentioned vectors have rapid character. However it should be mentioned that, even though there is a high propagule pressure, their populations are not established in wild. For this reason the answer will have low confidence. | Low       |
| 43                              | 7.09 | Is dispersal of the taxon density dependent?                                                                                                                                 | No  | Since this species are not reproducing themselves and they are object for recreational fisheries their population density is always regulated. They are not likely to reach such densities that would cause their further dispersal.           | Medium    |
| <b>8. Tolerance attributes</b>  |      |                                                                                                                                                                              |     |                                                                                                                                                                                                                                                |           |
| 44                              | 8.01 | Is the taxon able to withstand being out of water for extended periods (e.g. minimum of one or more hours) at some stage of its life cycle?                                  | No  | No information available                                                                                                                                                                                                                       | High      |
| 45                              | 8.02 | Is the taxon tolerant of a wide range of water quality conditions relevant to that taxon? [In the Justification field, indicate the relevant water quality variable(s) being | No  | Can not tolerate low oxygen environment and is very sensitive to temperature and to human-produced chemicals.                                                                                                                                  | High      |
| 46                              | 8.03 | Can the taxon be controlled or eradicated in the wild with chemical, biological, or other agents/means?                                                                      | Yes | Via rotenone in streams (Lintermans & Raadik 2001) and gill nets from lakes (Knapp & Matthews 1998).                                                                                                                                           | High      |
| 47                              | 8.04 | Is the taxon likely to tolerate or benefit from environmental/human disturbance?                                                                                             | No  | Very sensitive species and can not tolerate human disturbance.                                                                                                                                                                                 | Very high |

|                          |      |                                                                                                                                                              |          |                                                                                                                                                                                                                                                                                                |        |
|--------------------------|------|--------------------------------------------------------------------------------------------------------------------------------------------------------------|----------|------------------------------------------------------------------------------------------------------------------------------------------------------------------------------------------------------------------------------------------------------------------------------------------------|--------|
| 48                       | 8.05 | Is the taxon able to tolerate salinity levels that are higher or lower than those found in its usual environment?                                            | Yes      | Life cycle of rainbow trout may be presented in two forms: the anadromous phenotype, with a growth phase in saltwater, or the freshwater resident phenotype. The anadromous phenotype, however can still into freshwaters, increasing the species' capacity to disperse (Thibault et al 2010). | High   |
| 49                       | 8.06 | Are there effective natural enemies (predators) of the taxon present in the RA                                                                               | No       | No effective natural enemies present in RA area                                                                                                                                                                                                                                                | High   |
| <b>C. Climate change</b> |      |                                                                                                                                                              |          |                                                                                                                                                                                                                                                                                                |        |
| <b>9. Climate change</b> |      |                                                                                                                                                              |          |                                                                                                                                                                                                                                                                                                |        |
| 50                       | 9.01 | Under the predicted future climatic conditions, are the risks of entry into the RA area posed by the taxon likely to increase, decrease or not change?       | Increase | It was hypothesized that climate change might alert the mechanisms of transportation and introduction of non-native species. Commercial and recreational activities will increase, that itself increases the propagule pressure levels of non-native                                           | Medium |
| 51                       | 9.02 | Under the predicted future climatic conditions, are the risks of establishment posed by the taxon likely to increase, decrease or not change?                | Decrease | In terms of increased temperatures this species will be having troubles to survive in the wild.                                                                                                                                                                                                | Medium |
| 52                       | 9.03 | Under the predicted future climatic conditions, are the risks of dispersal within the RA area posed by the taxon likely to increase, decrease or not change? | Decrease | Increased temperatures will cause stress in <i>O. mykiss</i> populations making their populations weaker.                                                                                                                                                                                      | Low    |
| 53                       | 9.04 | Under the predicted future climatic conditions, what is the likely magnitude of future potential impacts on biodiversity and/or ecological integrity/status? | Lower    | The environment for them will be unbearable and this species populations will decrease.                                                                                                                                                                                                        | Medium |
| 54                       | 9.05 | Under the predicted future climatic conditions, what is the likely magnitude of future potential impacts on ecosystem structure and/or function?             | Lower    | The magnitude of future potential impact is low.                                                                                                                                                                                                                                               | Medium |
| 55                       | 9.06 | Under the predicted future climatic conditions, what is the likely magnitude of future potential impacts on ecosystem services/socio-economic factors?       | Lower    | The magnitude of future potential impact is low.                                                                                                                                                                                                                                               | Medium |

| Statistics                                     |             |
|------------------------------------------------|-------------|
| Scores                                         |             |
| <b>BRA</b>                                     | <b>26.5</b> |
| <b>BRA Outcome</b>                             | <b>-</b>    |
| <b>BRA+CCA</b>                                 | <b>18.5</b> |
| <b>BRA+CCA Outcome</b>                         | <b>-</b>    |
| Score partition                                |             |
| <b>A. Biogeography/Historical</b>              | <b>13.5</b> |
| 1. Domestication/Cultivation                   | 4.0         |
| 2. Climate, distribution and introduction risk | 2.0         |
| 3. Invasive elsewhere                          | 7.5         |
| <b>B. Biology/Ecology</b>                      | <b>13.0</b> |
| 4. Undesirable (or persistence) traits         | 4.0         |
| 5. Resource exploitation                       | 7.0         |
| 6. Reproduction                                | 1.0         |
| 7. Dispersal mechanisms                        | 2.0         |
| 8. Tolerance attributes                        | -1.0        |
| <b>C. Climate change</b>                       | <b>-8.0</b> |
| 9. Climate change                              | -8.0        |
| Answered Questions                             |             |
| <b>Total</b>                                   | <b>55</b>   |
| <b>A. Biogeography/Historical</b>              | <b>13</b>   |
| 1. Domestication/Cultivation                   | 3           |
| 2. Climate, distribution and introduction risk | 5           |
| 3. Invasive elsewhere                          | 5           |
| <b>B. Biology/Ecology</b>                      | <b>36</b>   |
| 4. Undesirable (or persistence) traits         | 12          |
| 5. Resource exploitation                       | 2           |
| 6. Reproduction                                | 7           |
| 7. Dispersal mechanisms                        | 9           |
| 8. Tolerance attributes                        | 6           |
| <b>C. Climate change</b>                       | <b>6</b>    |
| 9. Climate change                              | 6           |
| Sectors affected                               |             |
| <b>Commercial</b>                              | <b>8</b>    |
| <b>Environmental</b>                           | <b>6</b>    |
| <b>Species or population nuisance traits</b>   | <b>10</b>   |

| Thresholds     |             |
|----------------|-------------|
| <b>BRA</b>     | <b>-</b>    |
| <b>BRA+CCA</b> | <b>-</b>    |
| Confidence     |             |
| <b>BRA+CCA</b> | <b>0.68</b> |
| <b>BRA</b>     | <b>0.70</b> |
| <b>CCA</b>     | <b>0.46</b> |

| Date and Time       |  |
|---------------------|--|
| 21/05/2022 15:17:21 |  |

## AS-ISK v2

| Taxon and Assessor details         |                                                                                                                                     |
|------------------------------------|-------------------------------------------------------------------------------------------------------------------------------------|
| Category                           | Fishes and Lampreys (freshwater)                                                                                                    |
| Taxon name                         | <i>Oreochromis niloticus</i>                                                                                                        |
| Common name                        | Nile tilapia                                                                                                                        |
| Assessor                           | Bella Japoshvili                                                                                                                    |
| Risk screening context             |                                                                                                                                     |
| Reason and socio-economic benefits | the species is invasive in many countries and it was already documented in RA area once, also in                                    |
| Risk assessment area               | South Caucasus                                                                                                                      |
| Taxonomy                           | Actinopteri (ray-finned fishes) > Cichliformes (Cichlids, convict blennies) > Cichlidae (Cichlids)                                  |
| Native range                       | Africa, Nile basin                                                                                                                  |
| Introduced range                   | South and North America, European and Asian countries                                                                               |
| URL                                | <a href="https://www.fishbase.de/summary/Oreochromis-niloticus.html">https://www.fishbase.de/summary/Oreochromis-niloticus.html</a> |

|                                                |      |                                                                                                                                                                         | Response | Justification (references and/or other information)                                                                                                                                                                                                                                                                                                                                                                                                                                                                                                                                                                                                                                               | Confidence |
|------------------------------------------------|------|-------------------------------------------------------------------------------------------------------------------------------------------------------------------------|----------|---------------------------------------------------------------------------------------------------------------------------------------------------------------------------------------------------------------------------------------------------------------------------------------------------------------------------------------------------------------------------------------------------------------------------------------------------------------------------------------------------------------------------------------------------------------------------------------------------------------------------------------------------------------------------------------------------|------------|
| A. Biogeography/Historical                     |      |                                                                                                                                                                         |          |                                                                                                                                                                                                                                                                                                                                                                                                                                                                                                                                                                                                                                                                                                   |            |
| 1. Domestication/Cultivation                   |      |                                                                                                                                                                         |          |                                                                                                                                                                                                                                                                                                                                                                                                                                                                                                                                                                                                                                                                                                   |            |
| 1                                              | 1.01 | Has the taxon been the subject of domestication (or cultivation) for at least 20 generations?                                                                           | Yes      | Amal, M. N. A., & Zamri-Saad, M. (2011). Streptococcosis in tilapia ( <i>Oreochromis niloticus</i> ): a review. <i>Pertanika Journal of Tropical Agricultural Science</i> , 34(2), 195-206                                                                                                                                                                                                                                                                                                                                                                                                                                                                                                        | Very high  |
| 2                                              | 1.02 | Is the taxon harvested in the wild and likely to be sold or used in its live form?                                                                                      | Yes      | Is sold as ornamental and reared in captivity (Trewavas, E., 1983. Tilapiine fishes of the genera <i>Sarotherodon</i> , <i>Oreochromis</i> and <i>Danakilia</i> . <i>British Mus. Nat. Hist.</i> , London, UK. 583 p. (Ref. 2))                                                                                                                                                                                                                                                                                                                                                                                                                                                                   | Very high  |
| 3                                              | 1.03 | Does the taxon have invasive races, varieties, sub-taxa or congeners?                                                                                                   | Yes      | Global Invasive Species Database (2021) Species profile: <i>Oreochromis</i> . Downloaded from <a href="http://www.iucngisd.org/gisd/species.php?sc=813">http://www.iucngisd.org/gisd/species.php?sc=813</a> on 08-11-2021.                                                                                                                                                                                                                                                                                                                                                                                                                                                                        | Very high  |
| 2. Climate, distribution and introduction risk |      |                                                                                                                                                                         |          |                                                                                                                                                                                                                                                                                                                                                                                                                                                                                                                                                                                                                                                                                                   |            |
| 4                                              | 2.01 | How similar are the climatic conditions of the Risk Assessment (RA) area and the taxon's native range?                                                                  | Low      | Results of Climatch algorithm                                                                                                                                                                                                                                                                                                                                                                                                                                                                                                                                                                                                                                                                     | Medium     |
| 5                                              | 2.02 | What is the quality of the climate matching data?                                                                                                                       | Low      | No good enough climate data exists for a RA                                                                                                                                                                                                                                                                                                                                                                                                                                                                                                                                                                                                                                                       | Medium     |
| 6                                              | 2.03 | Is the taxon already present outside of captivity in the RA area?                                                                                                       | Yes      | Kuljanishvili, T., Epitashvili, G., Japoshvili, B., Patoka, J., & Kalous, L. (2021, April). Finding of Nile tilapia <i>Oreochromis niloticus</i> (Cichliformes: Cichlidae) in Georgia, the South Caucasus. In <i>IOP Conference Series: Earth and Environmental Science</i> (Vol. 744, No. 1, p. 012036). IOP Publishing.                                                                                                                                                                                                                                                                                                                                                                         | Low        |
| 7                                              | 2.04 | How many potential vectors could the taxon use to enter in the RA area?                                                                                                 | One      | Intentional introduction - Global Invasive Species Database (2021) Species profile: <i>Oreochromis</i> . Downloaded from <a href="http://www.iucngisd.org/gisd/species.php?sc=813">http://www.iucngisd.org/gisd/species.php?sc=813</a> on 08-11-2021.                                                                                                                                                                                                                                                                                                                                                                                                                                             | Very high  |
| 8                                              | 2.05 | Is the taxon currently found in close proximity to, and likely to enter into, the RA area in the near future (e.g. unintentional and intentional introductions)?        | Yes      | Kuljanishvili, T., Epitashvili, G., Japoshvili, B., Patoka, J., & Kalous, L. (2021, April). Finding of Nile tilapia <i>Oreochromis niloticus</i> (Cichliformes: Cichlidae) in Georgia, the South Caucasus. In <i>IOP Conference Series: Earth and Environmental Science</i> (Vol. 744, No. 1, p. 012036). IOP Publishing.                                                                                                                                                                                                                                                                                                                                                                         | Very high  |
| 3. Invasive elsewhere                          |      |                                                                                                                                                                         |          |                                                                                                                                                                                                                                                                                                                                                                                                                                                                                                                                                                                                                                                                                                   |            |
| 9                                              | 3.01 | Has the taxon become naturalised (established viable populations) outside its                                                                                           | Yes      | CABI, 2022. <i>Oreochromis niloticus</i> . In: <i>Invasive Species Compendium</i> . Wallingford, UK: CAB International.                                                                                                                                                                                                                                                                                                                                                                                                                                                                                                                                                                           | Very high  |
| 10                                             | 3.02 | In the taxon's introduced range, are there known adverse impacts to wild stocks or commercial taxa?                                                                     | Yes      | Gu, D. E., Ma, G. M., Zhu, Y. J., Xu, M., Luo, D., Li, Y. Y., ... & Hu, Y. C. (2015). The impacts of invasive Nile tilapia ( <i>Oreochromis niloticus</i> ) on the fisheries in the main rivers of Guangdong Province, China. <i>Biochemical Systematics and Ecology</i> , 59, 1-7.                                                                                                                                                                                                                                                                                                                                                                                                               | Very high  |
| 11                                             | 3.03 | In the taxon's introduced range, are there known adverse impacts to aquaculture?                                                                                        | No       | No published data                                                                                                                                                                                                                                                                                                                                                                                                                                                                                                                                                                                                                                                                                 | Low        |
| 12                                             | 3.04 | In the taxon's introduced range, are there known adverse impacts to ecosystem services?                                                                                 | Yes      | Deines, A. M. (2013). Environmental change and tradeoffs in freshwater ecosystem services: Nile Tilapia ( <i>Oreochromis niloticus</i> ) introduction to the Kafue River, Zambia. University of                                                                                                                                                                                                                                                                                                                                                                                                                                                                                                   | High       |
| 13                                             | 3.05 | In the taxon's introduced range, are there known adverse socio-economic impacts?                                                                                        | Yes      | Deines, A. M. (2013). Environmental change and tradeoffs in freshwater ecosystem services: Nile Tilapia ( <i>Oreochromis niloticus</i> ) introduction to the Kafue River, Zambia. University of                                                                                                                                                                                                                                                                                                                                                                                                                                                                                                   | High       |
| B. Biology/Ecology                             |      |                                                                                                                                                                         |          |                                                                                                                                                                                                                                                                                                                                                                                                                                                                                                                                                                                                                                                                                                   |            |
| 4. Undesirable (or persistence) traits         |      |                                                                                                                                                                         |          |                                                                                                                                                                                                                                                                                                                                                                                                                                                                                                                                                                                                                                                                                                   |            |
| 14                                             | 4.01 | Is it likely that the taxon will be poisonous or pose other risks to human health?                                                                                      | No       | No such an evidence                                                                                                                                                                                                                                                                                                                                                                                                                                                                                                                                                                                                                                                                               | Low        |
| 15                                             | 4.02 | Is it likely that the taxon will smother one or more native taxa (that are not threatened or protected)?                                                                | Yes      | Gu, D. E., Ma, G. M., Zhu, Y. J., Xu, M., Luo, D., Li, Y. Y., ... & Hu, Y. C. (2015). The impacts of invasive Nile tilapia ( <i>Oreochromis niloticus</i> ) on the fisheries in the main rivers of Guangdong Province, China. <i>Biochemical Systematics and Ecology</i> , 59, 1-7; Nico, L.G., Schofield, P.J., and Neilson, M.E., 2021, <i>Oreochromis niloticus</i> (Linnaeus, 1758): U.S. Geological Survey, Nonindigenous Aquatic Species Database, Gainesville, FL, <a href="https://nas.er.usgs.gov/queries/factsheet.aspx?SpeciesID=468">https://nas.er.usgs.gov/queries/factsheet.aspx?SpeciesID=468</a> , Revision Date: 1/8/2020, Peer Review Date: 12/18/2013, Access Date: 11/8/2021 | High       |
| 16                                             | 4.03 | Are there any threatened or protected taxa that the non-native taxon would parasitise in the RA area?                                                                   | No       | The species is not parasite                                                                                                                                                                                                                                                                                                                                                                                                                                                                                                                                                                                                                                                                       | High       |
| 17                                             | 4.04 | Is the taxon adaptable in terms of climatic and other environmental conditions, thus enhancing its potential persistence if it has invaded or could invade the RA area? | Yes      | Due to its widespread introduction                                                                                                                                                                                                                                                                                                                                                                                                                                                                                                                                                                                                                                                                | Medium     |
| 18                                             | 4.05 | Is the taxon likely to disrupt food-web structure/function in aquatic ecosystems if it has invaded or is likely to invade the RA                                        | Yes      | No respective study is known however the species is actively involving in the local ecosystem food web that most probably also introduce changes                                                                                                                                                                                                                                                                                                                                                                                                                                                                                                                                                  | Low        |



|                                 |      |                                                                                                                                                                    |     |                                                                                                                                                                                                                                                                                                            |           |
|---------------------------------|------|--------------------------------------------------------------------------------------------------------------------------------------------------------------------|-----|------------------------------------------------------------------------------------------------------------------------------------------------------------------------------------------------------------------------------------------------------------------------------------------------------------|-----------|
| 19                              | 4.06 | Is the taxon likely to exert adverse impacts on ecosystem services in the RA area?                                                                                 | Yes | Deines, Marion E. Wittmann, Jillian M. Deines & David M. Lodge (2016) Tradeoffs among Ecosystem Services Associated with Global Tilapia Introductions, Reviews in Fisheries Science & Aquaculture, 24:2, 178-191                                                                                           | High      |
| 20                              | 4.07 | Is it likely that the taxon will host, and/or act as a vector for, recognised pests and infectious agents that are endemic in the RA                               | No  | No such research exists                                                                                                                                                                                                                                                                                    | Low       |
| 21                              | 4.08 | Is it likely that the taxon will host, and/or act as a vector for, recognised pests and infectious agents that are absent from (novel to) the RA area?             | Yes | Dong, H. T., Nguyen, V. V., Le, H. D., Sangsuriya, P., Jitrakorn, S., Saksmerprom, V., ... & Rodkhum, C. (2015). Naturally concurrent infections of bacterial and viral pathogens in disease outbreaks in cultured Nile tilapia ( <i>Oreochromis niloticus</i> ) farms. <i>Aquaculture</i> , 448, 427-435. | Very high |
| 22                              | 4.09 | Is it likely that the taxon will achieve a body size that will make it more likely to be released from captivity?                                                  | Yes | Trewavas, E., 1983. Tilapiine fishes of the genera <i>Sarotherodon</i> , <i>Oreochromis</i> and <i>Danakilia</i> . British Mus. Nat. Hist., London, UK.                                                                                                                                                    | High      |
| 23                              | 4.10 | Is the taxon capable of sustaining itself in a range of water velocity conditions (e.g. versatile in habitat use)?                                                 | Yes | Trewavas, E., 1983. Tilapiine fishes of the genera <i>Sarotherodon</i> , <i>Oreochromis</i> and <i>Danakilia</i> . British Mus. Nat. Hist., London, UK. 583 p.                                                                                                                                             | High      |
| 24                              | 4.11 | Is it likely that the taxon's mode of existence (e.g. excretion of by-products) or behaviours (e.g. feeding) will reduce habitat quality for native taxa?          | No  | No such an evidence                                                                                                                                                                                                                                                                                        | Low       |
| 25                              | 4.12 | Is the taxon likely to maintain a viable population even when present in low densities (or persisting in adverse conditions by way of a dormant form)?             | No  | No respective study is available                                                                                                                                                                                                                                                                           | Low       |
| <b>5. Resource exploitation</b> |      |                                                                                                                                                                    |     |                                                                                                                                                                                                                                                                                                            |           |
| 26                              | 5.01 | Is the taxon likely to consume threatened or protected native taxa in the RA area?                                                                                 | Yes | <a href="https://nas.er.usgs.gov/queries/factsheet.aspx?SpeciesID=468">https://nas.er.usgs.gov/queries/factsheet.aspx?SpeciesID=468</a>                                                                                                                                                                    | High      |
| 27                              | 5.02 | Is the taxon likely to sequester food resources (including nutrients) to the detriment of native taxa in the RA area?                                              | Yes | Expected but no specific research has been done                                                                                                                                                                                                                                                            | Low       |
| <b>6. Reproduction</b>          |      |                                                                                                                                                                    |     |                                                                                                                                                                                                                                                                                                            |           |
| 28                              | 6.01 | Is the taxon likely to exhibit parental care and/or to reduce age-at-maturity in response to environmental conditions?                                             | Yes | Peterson, M. S., Slack, W. T., Brown-Peterson, N. J., & McDonald, J. L. (2004). Reproduction in nonnative environments: establishment of Nile tilapia, <i>Oreochromis niloticus</i> , in coastal Mississippi watersheds. <i>Copeia</i> , 2004(4), 842-849.                                                 | Very high |
| 29                              | 6.02 | Is the taxon likely to produce viable gametes or propagules (in the RA area)?                                                                                      | No  | Expected but not yet documented                                                                                                                                                                                                                                                                            | Low       |
| 30                              | 6.03 | Is the taxon likely to hybridise naturally with native taxa?                                                                                                       | Yes | Nico, L.G.; P.J. Schofield; M.E. Neilson (2019). "Oreochromis niloticus (Linnaeus, 1758)". U.S. Geological Survey, <i>Nonindigenous Aquatic Species Database</i>                                                                                                                                           | Low       |
| 31                              | 6.04 | Is the taxon likely to be hermaphroditic or to display asexual reproduction?                                                                                       | No  | Trewavas, E., 1983. Tilapiine fishes of the genera <i>Sarotherodon</i> , <i>Oreochromis</i> and <i>Danakilia</i> . British Mus. Nat. Hist., London, UK.                                                                                                                                                    | Medium    |
| 32                              | 6.05 | Is the taxon dependent on the presence of another taxon (or specific habitat features) to complete its life cycle?                                                 | No  | Not such an evidence exists.                                                                                                                                                                                                                                                                               | High      |
| 33                              | 6.06 | Is the taxon known (or likely) to produce a large number of propagules or offspring within a short time span (e.g. < 1 year)?                                      | Yes | Trewavas, E., 1983. Tilapiine fishes of the genera <i>Sarotherodon</i> , <i>Oreochromis</i> and <i>Danakilia</i> . British Mus. Nat. Hist., London, UK.                                                                                                                                                    | High      |
| 34                              | 6.07 | How many time units (days, months, years) does the taxon require to reach the age-at-first-reproduction?                                                           | 2   | Noakes, D.G.L. and E.K. Balon, 1982. Life histories of tilapias: an evolutionary perspective. p. 61-82. In R.S.V. Pullin and R.H. Lowe-McConnell (eds.) The biology and culture of tilapias. ICLARM Conf. Proc. 7.                                                                                         | High      |
| <b>7. Dispersal mechanisms</b>  |      |                                                                                                                                                                    |     |                                                                                                                                                                                                                                                                                                            |           |
| 35                              | 7.01 | How many potential internal vectors/pathways could the taxon use to disperse within the RA area (with suitable                                                     | One | Only human mediated dispersal is possible in RA                                                                                                                                                                                                                                                            | Very high |
| 36                              | 7.02 | Will any of these vectors/pathways bring the taxon in close proximity to one or more protected areas (e.g. MCZ, MPA, SSSI)?                                        | Yes | Cochis national park along the Black Sea is the most vulnerable for invasion                                                                                                                                                                                                                               | Medium    |
| 37                              | 7.03 | Does the taxon have a means of actively attaching itself to hard substrata (e.g. ship hulls, pilings, buoys) such that it enhances the likelihood of dispersal?    | No  | There is no such an evidence exist                                                                                                                                                                                                                                                                         | High      |
| 38                              | 7.04 | Is natural dispersal of the taxon likely to occur as eggs (for animals) or as propagules (for plants: seeds, spores) in the RA area?                               | No  | No such an evidence exist                                                                                                                                                                                                                                                                                  | Medium    |
| 39                              | 7.05 | Is natural dispersal of the taxon likely to occur as larvae/juveniles (for animals) or as fragments/seedlings (for plants) in the RA area?                         | Yes | Juveniles can be released intentionally/unintentionally                                                                                                                                                                                                                                                    | High      |
| 40                              | 7.06 | Are older life stages of the taxon likely to migrate in the RA area for reproduction?                                                                              | No  | Not amigration typically occurs in the Nile tilapia populations                                                                                                                                                                                                                                            | High      |
| 41                              | 7.07 | Are propagules or eggs of the taxon likely to be dispersed in the RA area by other animals?                                                                        | No  | No such an evidence exist                                                                                                                                                                                                                                                                                  | Medium    |
| 42                              | 7.08 | Is dispersal of the taxon along any of the vectors/pathways mentioned in the previous seven questions (35-41; i.e. both unintentional or intentional) likely to be | Yes | Expected based on professional judgement                                                                                                                                                                                                                                                                   | Low       |
| 43                              | 7.09 | Is dispersal of the taxon density dependent?                                                                                                                       | No  | Not such an evidence exists and this is even less relevant for the RA area                                                                                                                                                                                                                                 | High      |
| <b>8. Tolerance attributes</b>  |      |                                                                                                                                                                    |     |                                                                                                                                                                                                                                                                                                            |           |

|    |      |                                                                                                                                                                              |     |                                                                                                                                                       |        |
|----|------|------------------------------------------------------------------------------------------------------------------------------------------------------------------------------|-----|-------------------------------------------------------------------------------------------------------------------------------------------------------|--------|
| 44 | 8.01 | Is the taxon able to withstand being out of water for extended periods (e.g. minimum of one or more hours) at some stage of its life cycle?                                  | No  | No such an evidence exists                                                                                                                            | Medium |
| 45 | 8.02 | Is the taxon tolerant of a wide range of water quality conditions relevant to that taxon? [In the Justification field, indicate the relevant water quality variable(s) being | Yes | Kammerer, B. D. (2009). Short-term mechanisms of seawater acclimation in tilapia ( <i>Oreochromis mossambicus</i> ). University of California, Davis. | Medium |
| 46 | 8.03 | Can the taxon be controlled or eradicated in the wild with chemical, biological, or other agents/means?                                                                      | No  | No such an evidence exists                                                                                                                            | Low    |
| 47 | 8.04 | Is the taxon likely to tolerate or benefit from environmental/human disturbance?                                                                                             | No  | No such an evidence exist                                                                                                                             | Low    |
| 48 | 8.05 | Is the taxon able to tolerate salinity levels that are higher or lower than those found in its usual environment?                                                            | Yes | Kammerer, B. D. (2009). Short-term mechanisms of seawater acclimation in tilapia ( <i>Oreochromis mossambicus</i> ). University of California, Davis. | Medium |
| 49 | 8.06 | Are there effective natural enemies (predators) of the taxon present in the RA                                                                                               | No  | Not known based on professional judgement                                                                                                             | Low    |

#### C. Climate change

##### 9. Climate change

|    |      |                                                                                                                                                              |           |                                                                                                                                                                                                                   |     |
|----|------|--------------------------------------------------------------------------------------------------------------------------------------------------------------|-----------|-------------------------------------------------------------------------------------------------------------------------------------------------------------------------------------------------------------------|-----|
| 50 | 9.01 | Under the predicted future climatic conditions, are the risks of entry into the RA area posed by the taxon likely to increase, decrease or not change?       | No change | Not expected based on professional judgement                                                                                                                                                                      | Low |
| 51 | 9.02 | Under the predicted future climatic conditions, are the risks of establishment posed by the taxon likely to increase, decrease or not change?                | No change | Based on professional judgement                                                                                                                                                                                   | Low |
| 52 | 9.03 | Under the predicted future climatic conditions, are the risks of dispersal within the RA area posed by the taxon likely to increase, decrease or not change? | No change | Based on professional judgement                                                                                                                                                                                   | Low |
| 53 | 9.04 | Under the predicted future climatic conditions, what is the likely magnitude of future potential impacts on biodiversity and/or ecological integrity/status? | Higher    | Under climate change scenario where increase of temperature is expected, the establishment/distribution risks of tilapia is also expected that most probably will increase the impact on local ecosystems         | Low |
| 54 | 9.05 | Under the predicted future climatic conditions, what is the likely magnitude of future potential impacts on ecosystem structure and/or function?             | Higher    | Under climate change scenario where increase of temperature is expected, the establishment/distribution risks of tilapia is also expected that most probably will increase the impact on local ecosystems         | Low |
| 55 | 9.06 | Under the predicted future climatic conditions, what is the likely magnitude of future potential impacts on ecosystem services/socio-economic factors?       | Higher    | Under climate change scenario where increase of temperature is expected, the establishment/distribution risks of tilapia is also expected that most probably will increase the impact on local ecosystem services | Low |

| Statistics                                     |             |
|------------------------------------------------|-------------|
| Scores                                         |             |
| <b>BRA</b>                                     | <b>38.0</b> |
| <b>BRA Outcome</b>                             | -           |
| <b>BRA+CCA</b>                                 | <b>44.0</b> |
| <b>BRA+CCA Outcome</b>                         | -           |
| Score partition                                |             |
| <b>A. Biogeography/Historical</b>              | <b>19.0</b> |
| 1. Domestication/Cultivation                   | 4.0         |
| 2. Climate, distribution and introduction risk | 1.0         |
| 3. Invasive elsewhere                          | 14.0        |
| <b>B. Biology/Ecology</b>                      | <b>19.0</b> |
| 4. Undesirable (or persistence) traits         | 7.0         |
| 5. Resource exploitation                       | 7.0         |
| 6. Reproduction                                | 3.0         |
| 7. Dispersal mechanisms                        | -1.0        |
| 8. Tolerance attributes                        | 3.0         |
| <b>C. Climate change</b>                       | <b>6.0</b>  |
| 9. Climate change                              | 6.0         |
| Answered Questions                             |             |
| <b>Total</b>                                   | <b>55</b>   |
| <b>A. Biogeography/Historical</b>              | <b>13</b>   |
| 1. Domestication/Cultivation                   | 3           |
| 2. Climate, distribution and introduction risk | 5           |
| 3. Invasive elsewhere                          | 5           |
| <b>B. Biology/Ecology</b>                      | <b>36</b>   |
| 4. Undesirable (or persistence) traits         | 12          |
| 5. Resource exploitation                       | 2           |
| 6. Reproduction                                | 7           |
| 7. Dispersal mechanisms                        | 9           |
| 8. Tolerance attributes                        | 6           |
| <b>C. Climate change</b>                       | <b>6</b>    |
| 9. Climate change                              | 6           |
| Sectors affected                               |             |
| <b>Commercial</b>                              | <b>15</b>   |
| <b>Environmental</b>                           | <b>16</b>   |
| <b>Species or population nuisance traits</b>   | <b>16</b>   |

| Thresholds |   |
|------------|---|
| <b>BRA</b> | - |

|                   |                |             |
|-------------------|----------------|-------------|
|                   | <b>BRA+CCA</b> | <b>-</b>    |
| <b>Confidence</b> |                |             |
|                   | <b>BRA+CCA</b> | <b>0.57</b> |
|                   | <b>BRA</b>     | <b>0.61</b> |
|                   | <b>CCA</b>     | <b>0.25</b> |

|                            |  |
|----------------------------|--|
| <b>Date and Time</b>       |  |
| <b>16/05/2022 21:08:42</b> |  |

## AS-ISK v2

| Taxon and Assessor details         |                                                                                                                                     |
|------------------------------------|-------------------------------------------------------------------------------------------------------------------------------------|
| Category                           | Fishes and Lampreys (freshwater)                                                                                                    |
| Taxon name                         | <i>Oreochromis niloticus</i>                                                                                                        |
| Common name                        | Nile tilapia                                                                                                                        |
| Assessor                           | Giorgi Epitashvili                                                                                                                  |
| Risk screening context             |                                                                                                                                     |
| Reason and socio-economic benefits | The culture of Nile tilapia ( <i>Oreochromis niloticus</i> ) can be traced to ancient Egyptian times as                             |
| Risk assessment area               | South Caucasus                                                                                                                      |
| Taxonomy                           | <i>Oreochromis niloticus</i> (Linnaeus, 1758)                                                                                       |
| Native range                       | Africa: naturally occurring in coastal rivers of Israel, Nile basin (including lake Albert, Edward and                              |
| Introduced range                   | Nile tilapia were introduced to developing countries and cultured on a subsistence level to meet                                    |
| URL                                | <a href="https://www.fishbase.se/summary/oreochromis-niloticus.html">https://www.fishbase.se/summary/oreochromis-niloticus.html</a> |

|                                                |      | Response                                                                                                                                                         | Justification (references and/or other information) | Confidence                                                                                                                                                                                                                                                                                                                                                                                                                                                                                                                                                                                               |           |
|------------------------------------------------|------|------------------------------------------------------------------------------------------------------------------------------------------------------------------|-----------------------------------------------------|----------------------------------------------------------------------------------------------------------------------------------------------------------------------------------------------------------------------------------------------------------------------------------------------------------------------------------------------------------------------------------------------------------------------------------------------------------------------------------------------------------------------------------------------------------------------------------------------------------|-----------|
| A. Biogeography/Historical                     |      |                                                                                                                                                                  |                                                     |                                                                                                                                                                                                                                                                                                                                                                                                                                                                                                                                                                                                          |           |
| 1. Domestication/Cultivation                   |      |                                                                                                                                                                  |                                                     |                                                                                                                                                                                                                                                                                                                                                                                                                                                                                                                                                                                                          |           |
| 1                                              | 1.01 | Has the taxon been the subject of domestication (or cultivation) for at least 20 generations?                                                                    | Yes                                                 | The Nile tilapia, <i>Oreochromis niloticus</i> , is widely distributed in the world for aquacultural purposes. For instance, this fish is the main species farmed in Brazil, predominantly in net cages within freshwater reservoirs (Roriz et al., 2017).                                                                                                                                                                                                                                                                                                                                               | Very high |
| 2                                              | 1.02 | Is the taxon harvested in the wild and likely to be sold or used in its live form?                                                                               | Yes                                                 | Nile tilapia has been extensively propagated locally by farmers and anglers for recreational and sport fishing into small- and medium-sized reservoirs, often circumventing permitting                                                                                                                                                                                                                                                                                                                                                                                                                   | Very high |
| 3                                              | 1.03 | Does the taxon have invasive races, varieties, sub-taxa or congeners?                                                                                            | Yes                                                 | Nile tilapia is well-suited for aquaculture because of its wide range of trophic and ecological adaptations, and its adaptive life history characteristics that enable it to occupy many different tropical and sub-tropical freshwater niches (Trewavas, 1983). These attributes have inherently predisposed it to be a successful invasive species, with established feral populations in most tropical and sub-tropical environments in which it has either been cultured or has otherwise gained access to.                                                                                          | Very high |
| 2. Climate, distribution and introduction risk |      |                                                                                                                                                                  |                                                     |                                                                                                                                                                                                                                                                                                                                                                                                                                                                                                                                                                                                          |           |
| 4                                              | 2.01 | How similar are the climatic conditions of the Risk Assessment (RA) area and the taxon's native range?                                                           | Low                                                 | Climate analysis did not confirm the environmental suitability for the Nile tilapia in Georgia, the risk of this species establishment still exists. For example, Nile tilapia was not considered to be established in temperate environments in the US, since it was believed that the species could not survive the winter. However, the study done by Grammer et al. [15] proved its successful establishment in temperate Mississippi (Southeastern Mississippi, the Pascagoula River) (Kuljanishvili et al. 2021).                                                                                  | High      |
| 5                                              | 2.02 | What is the quality of the climate matching data?                                                                                                                | Low                                                 | Kuljanishvili et al. 2021                                                                                                                                                                                                                                                                                                                                                                                                                                                                                                                                                                                | Medium    |
| 6                                              | 2.03 | Is the taxon already present outside of captivity in the RA area?                                                                                                | Yes                                                 | In the summer of 2019, a tilapia ( <i>Oreochromis</i> sp.) fish appeared in local anglers caught in a small village Mshvidobani (Lagodekhi region) in Eastern Georgia (Kuljanishvili et al. 2021).                                                                                                                                                                                                                                                                                                                                                                                                       | Very high |
| 7                                              | 2.04 | How many potential vectors could the taxon use to enter in the RA area?                                                                                          | One                                                 | This species enters in the region for aquacultural purposes.                                                                                                                                                                                                                                                                                                                                                                                                                                                                                                                                             | Very high |
| 8                                              | 2.05 | Is the taxon currently found in close proximity to, and likely to enter into, the RA area in the near future (e.g. unintentional and intentional introductions)? | Yes                                                 | Nile tilapia was found in Turkey by Mert & Cicek, which was supposed to be its maximum northern distribution in the Mediterranean area. Authors, however, emphasized that the confirmation of this species establishment was needed. Later, Nile tilapia was included in the checklist of the freshwater fishes of                                                                                                                                                                                                                                                                                       | Very high |
| 3. Invasive elsewhere                          |      |                                                                                                                                                                  |                                                     |                                                                                                                                                                                                                                                                                                                                                                                                                                                                                                                                                                                                          |           |
| 9                                              | 3.01 | Has the taxon become naturalised (established viable populations) outside its native range?                                                                      | Yes                                                 | Study done by Grammer et al. proved successful establishment of Nile tilapia in temperate Mississippi (Southeastern Mississippi, the Pascagoula River). Although the extended temperatures range for Nile tilapia is 8-42°C, it was found to be well adapting to the outflows of the aquaculture farms, where water is warmer (so-called thermal refugia), which then could have led to survival and establishment of Nile tilapia in temperate regions in the USA                                                                                                                                       | Very high |
| 10                                             | 3.02 | In the taxon's introduced range, are there known adverse impacts to wild stocks or commercial taxa?                                                              | Yes                                                 | Several countries report adverse ecological impact after introduction of Nile tilapia.                                                                                                                                                                                                                                                                                                                                                                                                                                                                                                                   | Very high |
| 11                                             | 3.03 | In the taxon's introduced range, are there known adverse impacts to aquaculture?                                                                                 | Yes                                                 | The introduction of Nile tilapia did not increase the total catch-per-unit-of-effort (CPUE), the number of fishers actively fishing or their per capita income. Conversely, a significant reduction in the CPUE of other commercially important species was observed after the introduction of Nile tilapia in the reservoir. Although other factors cannot be rule out as possible explanations of the observed changes in the reservoir fisheries, the results are consistent with the hypothesis that these changes may have been caused, at least partially, by the introduction of the Nile tilapia | Very high |
| 12                                             | 3.04 | In the taxon's introduced range, are there known adverse impacts to ecosystem services?                                                                          | Yes                                                 | This review (1) provides a new estimate of the global scale of tilapia introduction and the reported occurrence of impacts to ecosystem services; (2) assesses whether reported changes to ecosystem services differ among species, regions and type of ecological effect reported; and (3) determine how perceptions of tilapia introduction are related to the reported occurrence of ecological effects and/or the contribution of tilapia to countries'                                                                                                                                              | High      |
| 13                                             | 3.05 | In the taxon's introduced range, are there known adverse socio-economic impacts?                                                                                 | No                                                  | Data deficient                                                                                                                                                                                                                                                                                                                                                                                                                                                                                                                                                                                           | Low       |
| B. Biology/Ecology                             |      |                                                                                                                                                                  |                                                     |                                                                                                                                                                                                                                                                                                                                                                                                                                                                                                                                                                                                          |           |
| 4. Undesirable (or persistence) traits         |      |                                                                                                                                                                  |                                                     |                                                                                                                                                                                                                                                                                                                                                                                                                                                                                                                                                                                                          |           |

|                                 |      |                                                                                                                                                                         |                |                                                                                                                                                                                                                                                                                                                                                                                                                                                                                                                                                                                                                      |           |
|---------------------------------|------|-------------------------------------------------------------------------------------------------------------------------------------------------------------------------|----------------|----------------------------------------------------------------------------------------------------------------------------------------------------------------------------------------------------------------------------------------------------------------------------------------------------------------------------------------------------------------------------------------------------------------------------------------------------------------------------------------------------------------------------------------------------------------------------------------------------------------------|-----------|
| 14                              | 4.01 | Is it likely that the taxon will be poisonous or pose other risks to human health?                                                                                      | No             | This species does not pose a threat to humans                                                                                                                                                                                                                                                                                                                                                                                                                                                                                                                                                                        | High      |
| 15                              | 4.02 | Is it likely that the taxon will smother one or more native taxa (that are not threatened or protected)?                                                                | Yes            | It is possible that this will happen if the species enters the new region.                                                                                                                                                                                                                                                                                                                                                                                                                                                                                                                                           | Medium    |
| 16                              | 4.03 | Are there any threatened or protected taxa that the non-native taxon would parasitise in the RA area?                                                                   | Yes            | The chances of this happening are quite high if this species spreads in the region                                                                                                                                                                                                                                                                                                                                                                                                                                                                                                                                   | Medium    |
| 17                              | 4.04 | Is the taxon adaptable in terms of climatic and other environmental conditions, thus enhancing its potential persistence if it has invaded or could invade the RA area? | Yes            | The probability of this is low though it can happen                                                                                                                                                                                                                                                                                                                                                                                                                                                                                                                                                                  | Low       |
| 18                              | 4.05 | Is the taxon likely to disrupt food-web structure/function in aquatic ecosystems if it has invaded or is likely to invade the RA area?                                  | Yes            | There is a possibility of that. The study conducted in the Gulf of Mexico showed that proliferation of Nile tilapia will have important detrimental effects on the structure of native food webs in shallow, structured coastal habitat (Martin et al. 2010).                                                                                                                                                                                                                                                                                                                                                        | Medium    |
| 19                              | 4.06 | Is the taxon likely to exert adverse impacts on ecosystem services in the RA area?                                                                                      | Yes            | There is a possibility of that                                                                                                                                                                                                                                                                                                                                                                                                                                                                                                                                                                                       | Medium    |
| 20                              | 4.07 | Is it likely that the taxon will host, and/or act as a vector for, recognised pests and infectious agents that are endemic in the RA area?                              | Not applicable | Data deficient                                                                                                                                                                                                                                                                                                                                                                                                                                                                                                                                                                                                       | Low       |
| 21                              | 4.08 | Is it likely that the taxon will host, and/or act as a vector for, recognised pests and infectious agents that are absent from (novel to) the RA area?                  | Not applicable | Data deficient                                                                                                                                                                                                                                                                                                                                                                                                                                                                                                                                                                                                       | Low       |
| 22                              | 4.09 | Is it likely that the taxon will achieve a body size that will make it more likely to be released from captivity?                                                       | Yes            | Nile tilapia is one of the most widely cultured species in aquaculture and stock enhancements (FAO).                                                                                                                                                                                                                                                                                                                                                                                                                                                                                                                 | Very high |
| 23                              | 4.10 | Is the taxon capable of sustaining itself in a range of water velocity conditions (e.g. versatile in habitat use)?                                                      | Yes            | Occurs in a wide variety of freshwater habitats like rivers, lakes, sewage canals and irrigation channels.                                                                                                                                                                                                                                                                                                                                                                                                                                                                                                           | High      |
| 24                              | 4.11 | Is it likely that the taxon's mode of existence (e.g. excretion of by-products) or behaviours (e.g. feeding) will reduce habitat quality for native taxa?               | Yes            | No research has been conducted in this direction, however it is expected that this will happen in some places.                                                                                                                                                                                                                                                                                                                                                                                                                                                                                                       | Medium    |
| 25                              | 4.12 | Is the taxon likely to maintain a viable population even when present in low densities (or persisting in adverse conditions by way of a dormant form)?                  | No             | Data deficient                                                                                                                                                                                                                                                                                                                                                                                                                                                                                                                                                                                                       | Low       |
| <b>5. Resource exploitation</b> |      |                                                                                                                                                                         |                |                                                                                                                                                                                                                                                                                                                                                                                                                                                                                                                                                                                                                      |           |
| 26                              | 5.01 | Is the taxon likely to consume threatened or protected native taxa in the RA area?                                                                                      | Yes            | The chances of this happening are quite high if this species spreads in the region                                                                                                                                                                                                                                                                                                                                                                                                                                                                                                                                   | High      |
| 27                              | 5.02 | Is the taxon likely to sequester food resources (including nutrients) to the detriment of native taxa in the RA area?                                                   | Yes            | The chances of this happening are quite high if this species spreads in the region                                                                                                                                                                                                                                                                                                                                                                                                                                                                                                                                   | Medium    |
| <b>6. Reproduction</b>          |      |                                                                                                                                                                         |                |                                                                                                                                                                                                                                                                                                                                                                                                                                                                                                                                                                                                                      |           |
| 28                              | 6.01 | Is the taxon likely to exhibit parental care and/or to reduce age-at-maturity in response to environmental conditions?                                                  | Yes            | Parental care is a well-developed reproductive behaviour in the family Cichlidae, the family to which the tilapias belong. While all the members of the three genera modify a portion of the substratum in which eggs are laid and fertilized, only the eggs of the genus <i>Tilapia</i> hatch in the nest.                                                                                                                                                                                                                                                                                                          | High      |
| 29                              | 6.02 | Is the taxon likely to produce viable gametes or propagules (in the RA area)?                                                                                           | No             | Currently this species does not reproduce in the Caucasus region                                                                                                                                                                                                                                                                                                                                                                                                                                                                                                                                                     | High      |
| 30                              | 6.03 | Is the taxon likely to hybridise naturally with native taxa?                                                                                                            | Yes            | The Nile tilapia <i>Oreochromis niloticus</i> has been introduced throughout Africa outside its native range for aquaculture purposes. Hybridisation between escaped <i>O. niloticus</i> and native <i>Oreochromis</i> species is of concern due to potential negative effects on wild genetic resources for conservation, aquaculture and capture fisheries. We document the 2008–2010 extent of <i>O. niloticus</i> established in the Kafue River, Zambia, test for hybridisation with two native species, <i>O. andersonii</i> and <i>O. macrochir</i> , using eight microsatellite loci, and evaluate losses in | Very high |
| 31                              | 6.04 | Is the taxon likely to be hermaphroditic or to display asexual reproduction?                                                                                            | No             | Data deficient                                                                                                                                                                                                                                                                                                                                                                                                                                                                                                                                                                                                       | Low       |
| 32                              | 6.05 | Is the taxon dependent on the presence of another taxon (or specific habitat features) to complete its life cycle?                                                      | No             | No such a study has been conducted                                                                                                                                                                                                                                                                                                                                                                                                                                                                                                                                                                                   | Medium    |
| 33                              | 6.06 | Is the taxon known (or likely) to produce a large number of propagules or offspring within a short time span (e.g. < 1 year)?                                           | No             | Nile tilapia are maternal mouthbrooders. A female lays her eggs in a simple nest prepared by the male, the male fertilizes the eggs and then the female picks the eggs up and incubates them in her mouth. Even after eggs hatch, fry will remain in the mother's mouth. Once the fry are free-swimming they will return to her mouth for protection. Females can produce several hundred to                                                                                                                                                                                                                         | Medium    |
| 34                              | 6.07 | How many time units (days, months, years) does the taxon require to reach the age-at-first-reproduction?                                                                | 1              | Sexual maturity in Nile tilapia reached at 3–6 months depending on temperature, reaching about 30 g.                                                                                                                                                                                                                                                                                                                                                                                                                                                                                                                 | High      |
| <b>7. Dispersal mechanisms</b>  |      |                                                                                                                                                                         |                |                                                                                                                                                                                                                                                                                                                                                                                                                                                                                                                                                                                                                      |           |
| 35                              | 7.01 | How many potential internal vectors/pathways could the taxon use to disperse within the RA area (with suitable                                                          | One            | This species enters in the region for aquacultural purposes.                                                                                                                                                                                                                                                                                                                                                                                                                                                                                                                                                         | High      |
| 36                              | 7.02 | Will any of these vectors/pathways bring the taxon in close proximity to one or more protected areas (e.g. MCZ, MPA, SSSI)?                                             | Yes            | Nile tilapia caught in a small village Mshvidobani (Lagodekhi region) in Eastern Georgia which is close from the Lagodekhi Protected Areas.                                                                                                                                                                                                                                                                                                                                                                                                                                                                          | Medium    |

|                                |      |                                                                                                                                                                              |                |                                                                                                                                                                                                                                                                                                                                                                                                                                           |           |
|--------------------------------|------|------------------------------------------------------------------------------------------------------------------------------------------------------------------------------|----------------|-------------------------------------------------------------------------------------------------------------------------------------------------------------------------------------------------------------------------------------------------------------------------------------------------------------------------------------------------------------------------------------------------------------------------------------------|-----------|
| 37                             | 7.03 | Does the taxon have a means of actively attaching itself to hard substrata (e.g. ship hulls, pilings, buoys) such that it enhances the likelihood of dispersal?              | No             | Such fact has not been detected                                                                                                                                                                                                                                                                                                                                                                                                           | High      |
| 38                             | 7.04 | Is natural dispersal of the taxon likely to occur as eggs (for animals) or as propagules (for plants: seeds, spores) in the RA area?                                         | No             | Such fact has not been detected yet.                                                                                                                                                                                                                                                                                                                                                                                                      | Medium    |
| 39                             | 7.05 | Is natural dispersal of the taxon likely to occur as larvae/juveniles (for animals) or as fragments/seedlings (for plants) in the RA area?                                   | No             | Such fact has not been detected yet.                                                                                                                                                                                                                                                                                                                                                                                                      | Medium    |
| 40                             | 7.06 | Are older life stages of the taxon likely to migrate in the RA area for reproduction?                                                                                        | No             | Such fact has not been detected.                                                                                                                                                                                                                                                                                                                                                                                                          | Medium    |
| 41                             | 7.07 | Are propagules or eggs of the taxon likely to be dispersed in the RA area by other animals?                                                                                  | No             | Such fact has not been detected yet.                                                                                                                                                                                                                                                                                                                                                                                                      | Medium    |
| 42                             | 7.08 | Is dispersal of the taxon along any of the vectors/pathways mentioned in the previous seven questions (35–41; i.e. both unintentional or intentional) likely to be           | Not applicable | Data deficient                                                                                                                                                                                                                                                                                                                                                                                                                            | Low       |
| 43                             | 7.09 | Is dispersal of the taxon density dependent?                                                                                                                                 | Not applicable | Data deficient                                                                                                                                                                                                                                                                                                                                                                                                                            | Low       |
| <b>8. Tolerance attributes</b> |      |                                                                                                                                                                              |                |                                                                                                                                                                                                                                                                                                                                                                                                                                           |           |
| 44                             | 8.01 | Is the taxon able to withstand being out of water for extended periods (e.g. minimum of one or more hours) at some stage of its life cycle?                                  | No             | Such fact has not been detected.                                                                                                                                                                                                                                                                                                                                                                                                          | Medium    |
| 45                             | 8.02 | Is the taxon tolerant of a wide range of water quality conditions relevant to that taxon? [In the Justification field, indicate the relevant water quality variable(s) being | Yes            | Occurs in a wide variety of freshwater habitats like rivers, lakes, sewage canals and irrigation channels. Does not do well in pure salt water, but is able to survive in brackish water.                                                                                                                                                                                                                                                 | Medium    |
| 46                             | 8.03 | Can the taxon be controlled or eradicated in the wild with chemical, biological, or other agents/means?                                                                      | Yes            | Among the seven (7) methods in use for the control of tilapia populations in aquaculture the following techniques may be appropriate and could be applied as soon as possible in controlling the Mozambique tilapia in the natural bodies of water in Nauru. (1) periodic harvesting of fry and fingerlings including the parents; (2) biological control; and (3) eradication of tilapia using organic toxicants and/or other chemicals. | High      |
| 47                             | 8.04 | Is the taxon likely to tolerate or benefit from environmental/human disturbance?                                                                                             | Yes            | An example of this is the tilapia found in the Lagodekhi region, Georgia, which spread from an artificial lake.                                                                                                                                                                                                                                                                                                                           | High      |
| 48                             | 8.05 | Is the taxon able to tolerate salinity levels that are higher or lower than those found in its usual environment?                                                            | Yes            | Nile tilapia is able to survive in brackish water (Lamboj 2004).                                                                                                                                                                                                                                                                                                                                                                          | High      |
| 49                             | 8.06 | Are there effective natural enemies (predators) of the taxon present in the RA area?                                                                                         | Yes            | There are several predators which can control Nile tilapia in the Caucasus region: <i>Esox lucius</i> , <i>Silurus glanis</i> , <i>Squalius</i> spp, <i>Salmo</i> spp, birds, Snakes, Otters etc.                                                                                                                                                                                                                                         | Very high |
| <b>C. Climate change</b>       |      |                                                                                                                                                                              |                |                                                                                                                                                                                                                                                                                                                                                                                                                                           |           |
| <b>9. Climate change</b>       |      |                                                                                                                                                                              |                |                                                                                                                                                                                                                                                                                                                                                                                                                                           |           |
| 50                             | 9.01 | Under the predicted future climatic conditions, are the risks of entry into the RA area posed by the taxon likely to increase, decrease or not change?                       | Increase       | In the view of global climate change the probability of species establishment and spreading is increasing as the fish enter the open waters of the Caucasus region (Kuljanishvili et al. 2021).                                                                                                                                                                                                                                           | Medium    |
| 51                             | 9.02 | Under the predicted future climatic conditions, are the risks of establishment posed by the taxon likely to increase, decrease or not change?                                | Increase       | In the view of global climate change the probability of species establishment and spreading is increasing as the fish enter the open waters of the Caucasus region (Kuljanishvili et al. 2021).                                                                                                                                                                                                                                           | Medium    |
| 52                             | 9.03 | Under the predicted future climatic conditions, are the risks of dispersal within the RA area posed by the taxon likely to increase, decrease or not change?                 | Increase       | In the view of global climate change the probability of species establishment and spreading is increasing as the fish enter the open waters of the Caucasus region (Kuljanishvili et al. 2021).                                                                                                                                                                                                                                           | Medium    |
| 53                             | 9.04 | Under the predicted future climatic conditions, what is the likely magnitude of future potential impacts on biodiversity and/or ecological integrity/status?                 | Higher         | In the view of global climate change the probability of species establishment and spreading is increasing as the fish enter the open waters of the Caucasus region as well as its impact on local biodiversity will be high.                                                                                                                                                                                                              | Medium    |
| 54                             | 9.05 | Under the predicted future climatic conditions, what is the likely magnitude of future potential impacts on ecosystem structure and/or function?                             | Higher         | In the view of global climate change the probability of species establishment and spreading is increasing as the fish enter the open waters of the Caucasus region as well as its impact on local biodiversity and ecosystem structure will be high.                                                                                                                                                                                      | Medium    |
| 55                             | 9.06 | Under the predicted future climatic conditions, what is the likely magnitude of future potential impacts on ecosystem services/socio-economic factors?                       | Higher         | In the view of global climate change the probability of species establishment and spreading is increasing as the fish enter the open waters of the Caucasus region as well as its impact on local biodiversity and ecosystem services will be high.                                                                                                                                                                                       | Medium    |

| Statistics                                     |             |
|------------------------------------------------|-------------|
| Scores                                         |             |
| <b>BRA</b>                                     | <b>36.0</b> |
| <b>BRA Outcome</b>                             | <b>-</b>    |
| <b>BRA+CCA</b>                                 | <b>48.0</b> |
| <b>BRA+CCA Outcome</b>                         | <b>-</b>    |
| Score partition                                |             |
| <b>A. Biogeography/Historical</b>              | <b>19.0</b> |
| 1. Domestication/Cultivation                   | 4.0         |
| 2. Climate, distribution and introduction risk | 1.0         |
| 3. Invasive elsewhere                          | 14.0        |
| <b>B. Biology/Ecology</b>                      | <b>17.0</b> |
| 4. Undesirable (or persistence) traits         | 8.0         |
| 5. Resource exploitation                       | 7.0         |

|                                                       |             |
|-------------------------------------------------------|-------------|
| 6. <i>Reproduction</i>                                | 3.0         |
| 7. <i>Dispersal mechanisms</i>                        | -4.0        |
| 8. <i>Tolerance attributes</i>                        | 3.0         |
| <b>C. Climate change</b>                              | <b>12.0</b> |
| 9. <i>Climate change</i>                              | 12.0        |
| <b>Answered Questions</b>                             |             |
| <b>Total</b>                                          | <b>55</b>   |
| <b>A. Biogeography/Historical</b>                     | <b>13</b>   |
| 1. <i>Domestication/Cultivation</i>                   | 3           |
| 2. <i>Climate, distribution and introduction risk</i> | 5           |
| 3. <i>Invasive elsewhere</i>                          | 5           |
| <b>B. Biology/Ecology</b>                             | <b>36</b>   |
| 4. <i>Undesirable (or persistence) traits</i>         | 12          |
| 5. <i>Resource exploitation</i>                       | 2           |
| 6. <i>Reproduction</i>                                | 7           |
| 7. <i>Dispersal mechanisms</i>                        | 9           |
| 8. <i>Tolerance attributes</i>                        | 6           |
| <b>C. Climate change</b>                              | <b>6</b>    |
| 9. <i>Climate change</i>                              | 6           |
| <b>Sectors affected</b>                               |             |
| <b>Commercial</b>                                     | <b>14</b>   |
| <b>Environmental</b>                                  | <b>17</b>   |
| <b>Species or population nuisance traits</b>          | <b>19</b>   |

|                   |                |             |
|-------------------|----------------|-------------|
| <b>Thresholds</b> |                |             |
|                   | <b>BRA</b>     | -           |
|                   | <b>BRA+CCA</b> | -           |
| <b>Confidence</b> |                |             |
|                   | <b>BRA+CCA</b> | <b>0.63</b> |
|                   | <b>BRA</b>     | <b>0.65</b> |
|                   | <b>CCA</b>     | <b>0.50</b> |

|                            |  |
|----------------------------|--|
| <b>Date and Time</b>       |  |
| <b>13/05/2022 14:46:49</b> |  |

## AS-ISK v2

| Taxon and Assessor details         |                                                                                                                                     |
|------------------------------------|-------------------------------------------------------------------------------------------------------------------------------------|
| Category                           | Fishes and Lampreys (freshwater)                                                                                                    |
| Taxon name                         | <i>Oreochromis niloticus</i>                                                                                                        |
| Common name                        | Nile tilapia                                                                                                                        |
| Assessor                           | Tatia Kuljanishvili                                                                                                                 |
| Risk screening context             |                                                                                                                                     |
| Reason and socio-economic benefits | Has been recorded from East Georgian Rivers                                                                                         |
| Risk assessment area               | South Caucasus                                                                                                                      |
| Taxonomy                           | Actinopteri (ray-finned fishes) > Cichliformes (Cichlids, convict blennies) > Cichlidae (Cichlids) >                                |
| Native range                       | Africa, The Nile basin                                                                                                              |
| Introduced range                   | East Georgia                                                                                                                        |
| URL                                | <a href="https://www.fishbase.de/summary/Oreochromis-niloticus.html">https://www.fishbase.de/summary/Oreochromis-niloticus.html</a> |

|                                                |      |                                                                                                                                                                  | Response | Justification (references and/or other information)                                                                                                                                                                                                                                                                                                                                                                                                                                                                                                                                                                                                                                                                                                                                                                                                                                                                                                                                                                                                    | Confidence |
|------------------------------------------------|------|------------------------------------------------------------------------------------------------------------------------------------------------------------------|----------|--------------------------------------------------------------------------------------------------------------------------------------------------------------------------------------------------------------------------------------------------------------------------------------------------------------------------------------------------------------------------------------------------------------------------------------------------------------------------------------------------------------------------------------------------------------------------------------------------------------------------------------------------------------------------------------------------------------------------------------------------------------------------------------------------------------------------------------------------------------------------------------------------------------------------------------------------------------------------------------------------------------------------------------------------------|------------|
| A. Biogeography/Historical                     |      |                                                                                                                                                                  |          |                                                                                                                                                                                                                                                                                                                                                                                                                                                                                                                                                                                                                                                                                                                                                                                                                                                                                                                                                                                                                                                        |            |
| 1. Domestication/Cultivation                   |      |                                                                                                                                                                  |          |                                                                                                                                                                                                                                                                                                                                                                                                                                                                                                                                                                                                                                                                                                                                                                                                                                                                                                                                                                                                                                                        |            |
| 1                                              | 1.01 | Has the taxon been the subject of domestication (or cultivation) for at least 20 generations?                                                                    | Yes      | "The culture of Nile tilapia ( <i>Oreochromis niloticus</i> ) can be traced to ancient Egyptian times as depicted on bas-relief from an Egyptian tomb dating back over 4000 years, which showed the fish held in ornamental ponds. While significant worldwide distribution of tilapias, primarily <i>Oreochromis mossambicus</i> , occurred during the 1940s and 1950s, distribution of the more desirable Nile tilapia occurred during the 1960s up to the 1980s" <a href="http://www.fao.org/fishery/culturedspecies/Oreochromis_niloticus/en#tcNA003F">http://www.fao.org/fishery/culturedspecies/Oreochromis_niloticus/en#tcNA003F</a>                                                                                                                                                                                                                                                                                                                                                                                                            | Very high  |
| 2                                              | 1.02 | Is the taxon harvested in the wild and likely to be sold or used in its live form?                                                                               | Yes      | This is fisheries important species that can be harvested in the wild, ca be sold or used in its live form.                                                                                                                                                                                                                                                                                                                                                                                                                                                                                                                                                                                                                                                                                                                                                                                                                                                                                                                                            | Very high  |
| 3                                              | 1.03 | Does the taxon have invasive races, varieties, sub-taxa or congeners?                                                                                            | Yes      | For instance, Blue tilapia                                                                                                                                                                                                                                                                                                                                                                                                                                                                                                                                                                                                                                                                                                                                                                                                                                                                                                                                                                                                                             | High       |
| 2. Climate, distribution and introduction risk |      |                                                                                                                                                                  |          |                                                                                                                                                                                                                                                                                                                                                                                                                                                                                                                                                                                                                                                                                                                                                                                                                                                                                                                                                                                                                                                        |            |
| 4                                              | 2.01 | How similar are the climatic conditions of the Risk Assessment (RA) area and the taxon's native range?                                                           | Low      | Not much similar                                                                                                                                                                                                                                                                                                                                                                                                                                                                                                                                                                                                                                                                                                                                                                                                                                                                                                                                                                                                                                       | Medium     |
| 5                                              | 2.02 | What is the quality of the climate matching data?                                                                                                                | Medium   | Quality of Climatch is medium                                                                                                                                                                                                                                                                                                                                                                                                                                                                                                                                                                                                                                                                                                                                                                                                                                                                                                                                                                                                                          | Medium     |
| 6                                              | 2.03 | Is the taxon already present outside of captivity in the RA area?                                                                                                | Yes      | It has been found in the rivers of eastern Georgia                                                                                                                                                                                                                                                                                                                                                                                                                                                                                                                                                                                                                                                                                                                                                                                                                                                                                                                                                                                                     | Very high  |
| 7                                              | 2.04 | How many potential vectors could the taxon use to enter in the RA area?                                                                                          | One      | Aquaculture                                                                                                                                                                                                                                                                                                                                                                                                                                                                                                                                                                                                                                                                                                                                                                                                                                                                                                                                                                                                                                            | Very high  |
| 8                                              | 2.05 | Is the taxon currently found in close proximity to, and likely to enter into, the RA area in the near future (e.g. unintentional and intentional introductions)? | Yes      | Yes, in Turkey for instance (Mert & Cicek 2010).                                                                                                                                                                                                                                                                                                                                                                                                                                                                                                                                                                                                                                                                                                                                                                                                                                                                                                                                                                                                       | High       |
| 3. Invasive elsewhere                          |      |                                                                                                                                                                  |          |                                                                                                                                                                                                                                                                                                                                                                                                                                                                                                                                                                                                                                                                                                                                                                                                                                                                                                                                                                                                                                                        |            |
| 9                                              | 3.01 | Has the taxon become naturalised (established viable populations) outside its native range?                                                                      | Yes      | Has been become naturalised for instance in India <a href="https://india.mongabay.com/2020/10/commentary-tilapia-how-an-invasive-fish-came-to-dominate-our-ecology-food-and-psyche/">https://india.mongabay.com/2020/10/commentary-tilapia-how-an-invasive-fish-came-to-dominate-our-ecology-food-and-psyche/</a> . their populations are known to exist at least in 114 countries (Deines 2016) and at least 55% of all countries report established tilapia populations outside aquaculture (Deines 2016)                                                                                                                                                                                                                                                                                                                                                                                                                                                                                                                                            | Very high  |
| 10                                             | 3.02 | In the taxon's introduced range, are there known adverse impacts to wild stocks or commercial taxa?                                                              | Yes      | Tilapias can very easily compete the native species by feeding on their resources. "increasing tilapia production may cause a decrease in populations of harvestable native species, a decrease in habitat, or recreational and cultural ecosystem services linked to the native species harmed by tilapia (Canonico et al., 2005)"                                                                                                                                                                                                                                                                                                                                                                                                                                                                                                                                                                                                                                                                                                                    | Very high  |
| 11                                             | 3.03 | In the taxon's introduced range, are there known adverse impacts to aquaculture?                                                                                 | Yes      | Tilapia have also been implicated in harm to other fisheries such as milkfish aquaculture in Nauru (Ranoemihardjo, 1981), and cyprinid harvests in India (Sugunan, 2000; Sugunan, 1995)"                                                                                                                                                                                                                                                                                                                                                                                                                                                                                                                                                                                                                                                                                                                                                                                                                                                               | Very high  |
| 12                                             | 3.04 | In the taxon's introduced range, are there known adverse impacts to ecosystem                                                                                    | Yes      | Water quality; transmitting diseases.                                                                                                                                                                                                                                                                                                                                                                                                                                                                                                                                                                                                                                                                                                                                                                                                                                                                                                                                                                                                                  | Medium     |
| 13                                             | 3.05 | In the taxon's introduced range, are there known adverse socio-economic impacts?                                                                                 | No       | Results also illustrate that increasing research efforts leads to increasingly ambivalent perspectives about the net socioeconomic value of tilapia introductions, as undesirable ecological impacts become as apparent as the socioeconomic benefits of tilapia production. In some cases, perspectives are regionally determined. There is not, nor is there likely ever to be, a global consensus on the socioeconomic merits of tilapia introduction. Rather, we recommend that decisions be informed by comparisons of the regional and local economic benefits to the regional and local ecological costs now and in the future. While the ecological effects may be similar over much of the introduced range of tilapia, as results demonstrate, there is no reason to expect uniform socioeconomic benefits. The work of managers, decision and policy makers, and other stakeholders is therefore made all the more relevant in the careful consideration of local context in decisions about tilapia introductions. And there will be ample | Low        |
| B. Biology/Ecology                             |      |                                                                                                                                                                  |          |                                                                                                                                                                                                                                                                                                                                                                                                                                                                                                                                                                                                                                                                                                                                                                                                                                                                                                                                                                                                                                                        |            |
| 4. Undesirable (or persistence) traits         |      |                                                                                                                                                                  |          |                                                                                                                                                                                                                                                                                                                                                                                                                                                                                                                                                                                                                                                                                                                                                                                                                                                                                                                                                                                                                                                        |            |
| 14                                             | 4.01 | Is it likely that the taxon will be poisonous or pose other risks to human health?                                                                               | No       | Not poisonous                                                                                                                                                                                                                                                                                                                                                                                                                                                                                                                                                                                                                                                                                                                                                                                                                                                                                                                                                                                                                                          | Very high  |
| 15                                             | 4.02 | Is it likely that the taxon will smother one or more native taxa (that are not threatened or protected)?                                                         | Yes      | It is possible                                                                                                                                                                                                                                                                                                                                                                                                                                                                                                                                                                                                                                                                                                                                                                                                                                                                                                                                                                                                                                         | High       |



|                                 |      |                                                                                                                                                                         |     |                                                                                                                                                                                                                                                                                                                  |           |
|---------------------------------|------|-------------------------------------------------------------------------------------------------------------------------------------------------------------------------|-----|------------------------------------------------------------------------------------------------------------------------------------------------------------------------------------------------------------------------------------------------------------------------------------------------------------------|-----------|
| 16                              | 4.03 | Are there any threatened or protected taxa that the non-native taxon would parasitise in the RA area?                                                                   | No  | Does not parasite                                                                                                                                                                                                                                                                                                | Very high |
| 17                              | 4.04 | Is the taxon adaptable in terms of climatic and other environmental conditions, thus enhancing its potential persistence if it has invaded or could invade the RA area? | Yes | it can adapt to different salinities and temperatures                                                                                                                                                                                                                                                            | Medium    |
| 18                              | 4.05 | Is the taxon likely to disrupt food-web structure/function in aquatic ecosystems if it has invaded or is likely to invade the RA area?                                  | No  | species of the genus Tilapia are typically macrophyte feeders while Oreochromis are typically microphagous (Beveridge and Baird, 2000). As a result, Tilapia have previously been used to control aquatic weeds (Hauser et al., 1977), suggesting these species may impact plant habitats relatively frequently. | Medium    |
| 19                              | 4.06 | Is the taxon likely to exert adverse impacts on ecosystem services in the RA area?                                                                                      | Yes | More than 80% of published ecological research on tilapia reports changes in ecosystem services (Deines 2016)                                                                                                                                                                                                    | High      |
| 20                              | 4.07 | Is it likely that the taxon will host, and/or act as a vector for, recognised pests and infectious agents that are endemic in the RA area?                              | Yes | Tilapia provided a reservoir which maintained or propagated the incidence of an existing pathogen or parasite (Deines 2016)                                                                                                                                                                                      | High      |
| 21                              | 4.08 | Is it likely that the taxon will host, and/or act as a vector for, recognised pests and infectious agents that are absent from (novel to) the RA area?                  | Yes | Tilapia can be a vector for nonindigenous pathogens or parasites (Deines 2016)                                                                                                                                                                                                                                   | High      |
| 22                              | 4.09 | Is it likely that the taxon will achieve a body size that will make it more likely to be released from captivity?                                                       | Yes | Max length is 60cm                                                                                                                                                                                                                                                                                               | High      |
| 23                              | 4.10 | Is the taxon capable of sustaining itself in a range of water velocity conditions (e.g. versatile in habitat use)?                                                      | Yes | Occurs in a wide variety of freshwater habitats like rivers, lakes, sewage canals and irrigation channels                                                                                                                                                                                                        | Medium    |
| 24                              | 4.11 | Is it likely that the taxon's mode of existence (e.g. excretion of by-products) or behaviours (e.g. feeding) will reduce habitat quality for native taxa?               | Yes | Reductions in other ecosystem services caused by tilapia are associated with the loss of aquatic plants and the habitats they provide to native species (Crutchfield, 1995), as well as undesirable biotic and abiotic changes associated with eutrophication (Figueroa and Giani, 2005).                        | High      |
| 25                              | 4.12 | Is the taxon likely to maintain a viable population even when present in low densities (or persisting in adverse conditions by way of a dormant form)?                  | Yes | Absolutely. The parental care is the one of the traits that allow them to be successful invaders                                                                                                                                                                                                                 | Very high |
| <b>5. Resource exploitation</b> |      |                                                                                                                                                                         |     |                                                                                                                                                                                                                                                                                                                  |           |
| 26                              | 5.01 | Is the taxon likely to consume threatened or protected native taxa in the RA area?                                                                                      | No  | No. less likely                                                                                                                                                                                                                                                                                                  | High      |
| 27                              | 5.02 | Is the taxon likely to sequester food resources (including nutrients) to the detriment of native taxa in the RA area?                                                   | Yes | It is possible. However, the impact does not seem to be high                                                                                                                                                                                                                                                     | Low       |
| <b>6. Reproduction</b>          |      |                                                                                                                                                                         |     |                                                                                                                                                                                                                                                                                                                  |           |
| 28                              | 6.01 | Is the taxon likely to exhibit parental care and/or to reduce age-at-maturity in response to environmental conditions?                                                  | Yes | They are mouth breeders                                                                                                                                                                                                                                                                                          | Very high |
| 29                              | 6.02 | Is the taxon likely to produce viable gametes or propagules (in the RA area)?                                                                                           | No  | The strict winter conditions will not allow this species to produce viable gametes. However, it is known that this species has become established in temperate Mississippi. in the outflow of fishery farms, where the temperatures were higher during winter.                                                   | High      |
| 30                              | 6.03 | Is the taxon likely to hybridise naturally with native taxa?                                                                                                            | Yes | Yes this species can hybridise with native taxa in Africa                                                                                                                                                                                                                                                        | Very high |
| 31                              | 6.04 | Is the taxon likely to be hermaphroditic or to display asexual reproduction?                                                                                            | No  | No. Does not display asexual reproduction                                                                                                                                                                                                                                                                        | Very high |
| 32                              | 6.05 | Is the taxon dependent on the presence of another taxon (or specific habitat features) to complete its life cycle?                                                      | No  | No. See: <a href="https://www.fishbase.de/summary/Oreochromis-niloticus.html">https://www.fishbase.de/summary/Oreochromis-niloticus.html</a>                                                                                                                                                                     | Very high |
| 33                              | 6.06 | Is the taxon known (or likely) to produce a large number of propagules or offspring within a short time span (e.g. < 1 year)?                                           | Yes | Several yearly spawnings every 30 days. Females incubate eggs inside their mouths (approximately for a week) overall it can be 200 eggs                                                                                                                                                                          | Very high |
| 34                              | 6.07 | How many time units (days, months, years) does the taxon require to reach the age-at-first-reproduction?                                                                | 3   | 3-6 months                                                                                                                                                                                                                                                                                                       | Very high |
| <b>7. Dispersal mechanisms</b>  |      |                                                                                                                                                                         |     |                                                                                                                                                                                                                                                                                                                  |           |
| 35                              | 7.01 | How many potential internal vectors/pathways could the taxon use to disperse within the RA area (with suitable)?                                                        | >1  | Aquaculture, Self-spreading                                                                                                                                                                                                                                                                                      | High      |
| 36                              | 7.02 | Will any of these vectors/pathways bring the taxon in close proximity to one or more protected areas (e.g. MCZ, MPA, SSSI)?                                             | Yes | It is possible.                                                                                                                                                                                                                                                                                                  | Medium    |
| 37                              | 7.03 | Does the taxon have a means of actively attaching itself to hard substrata (e.g. ship hulls, pilings, buoys) such that it enhances the likelihood of dispersal?         | No  | No. Morphologically this species does not have a means of actively attaching itself to hard substrata                                                                                                                                                                                                            | Very high |
| 38                              | 7.04 | Is natural dispersal of the taxon likely to occur as eggs (for animals) or as propagules (for plants: seeds, spores) in the RA area?                                    | No  | No                                                                                                                                                                                                                                                                                                               | Very high |
| 39                              | 7.05 | Is natural dispersal of the taxon likely to occur as larvae/juveniles (for animals) or as fragments/seedlings (for plants) in the RA area?                              | Yes | Yes. it is possible.                                                                                                                                                                                                                                                                                             | High      |
| 40                              | 7.06 | Are older life stages of the taxon likely to migrate in the RA area for reproduction?                                                                                   | No  | Does not migrate                                                                                                                                                                                                                                                                                                 | Very high |
| 41                              | 7.07 | Are propagules or eggs of the taxon likely to be dispersed in the RA area by other animals?                                                                             | No  | No. Can not be dispersed by other animals                                                                                                                                                                                                                                                                        | Very high |

|                                |      |                                                                                                                                                                              |           |                                                                                                                                                                                                                                                                                                                                  |           |
|--------------------------------|------|------------------------------------------------------------------------------------------------------------------------------------------------------------------------------|-----------|----------------------------------------------------------------------------------------------------------------------------------------------------------------------------------------------------------------------------------------------------------------------------------------------------------------------------------|-----------|
| 42                             | 7.08 | Is dispersal of the taxon along any of the vectors/pathways mentioned in the previous seven questions (35–41; i.e. both unintentional or intentional) likely to be           | Yes       | Yes they seem to be rapid                                                                                                                                                                                                                                                                                                        | Very high |
| 43                             | 7.09 | Is dispersal of the taxon density dependent?                                                                                                                                 | No        | No (Osofero et al 2009)                                                                                                                                                                                                                                                                                                          | Medium    |
| <b>8. Tolerance attributes</b> |      |                                                                                                                                                                              |           |                                                                                                                                                                                                                                                                                                                                  |           |
| 44                             | 8.01 | Is the taxon able to withstand being out of water for extended periods (e.g. minimum of one or more hours) at some stage of its life cycle?                                  | No        | No                                                                                                                                                                                                                                                                                                                               | High      |
| 45                             | 8.02 | Is the taxon tolerant of a wide range of water quality conditions relevant to that taxon? [In the Justification field, indicate the relevant water quality variable(s) being | No        | Can not tolerate temperature changes, or high salinities                                                                                                                                                                                                                                                                         | Medium    |
| 46                             | 8.03 | Can the taxon be controlled or eradicated in the wild with chemical, biological, or other agents/means?                                                                      | No        | NO                                                                                                                                                                                                                                                                                                                               | High      |
| 47                             | 8.04 | Is the taxon likely to tolerate or benefit from environmental/human disturbance?                                                                                             | No        | No information available                                                                                                                                                                                                                                                                                                         | Low       |
| 48                             | 8.05 | Is the taxon able to tolerate salinity levels that are higher or lower than those found in its usual environment?                                                            | No        | They can not tolerate high salinities                                                                                                                                                                                                                                                                                            | High      |
| 49                             | 8.06 | Are there effective natural enemies (predators) of the taxon present in the RA                                                                                               | No        | No information available                                                                                                                                                                                                                                                                                                         | Low       |
| <b>C. Climate change</b>       |      |                                                                                                                                                                              |           |                                                                                                                                                                                                                                                                                                                                  |           |
| <b>9. Climate change</b>       |      |                                                                                                                                                                              |           |                                                                                                                                                                                                                                                                                                                                  |           |
| 50                             | 9.01 | Under the predicted future climatic conditions, are the risks of entry into the RA area posed by the taxon likely to increase, decrease or not change?                       | Increase  | It was hypotheses that climate change might alert the mechanisms of transportation and introduction of non-native species. Commercial and recreational activities will increase, that itself increases the propagule pressure levels of non-native                                                                               | Very high |
| 51                             | 9.02 | Under the predicted future climatic conditions, are the risks of establishment posed by the taxon likely to increase, decrease or not change?                                | Increase  | Increased temperatures will cause this species establishment in RA                                                                                                                                                                                                                                                               | Very high |
| 52                             | 9.03 | Under the predicted future climatic conditions, are the risks of dispersal within the RA area posed by the taxon likely to increase, decrease or not change?                 | Increase  | Population densities will increase making them on one hand impossible to eradicate and on the other hand, affecting native organisms due to competition, that does not leave much resources for native ones.                                                                                                                     | Very high |
| 53                             | 9.04 | Under the predicted future climatic conditions, what is the likely magnitude of future potential impacts on biodiversity and/or ecological integrity/status?                 | No change | Difficult to judge                                                                                                                                                                                                                                                                                                               | Low       |
| 54                             | 9.05 | Under the predicted future climatic conditions, what is the likely magnitude of future potential impacts on ecosystem structure and/or function?                             | Higher    | Higher                                                                                                                                                                                                                                                                                                                           | Medium    |
| 55                             | 9.06 | Under the predicted future climatic conditions, what is the likely magnitude of future potential impacts on ecosystem services/socio-economic factors?                       | Higher    | Under the predicted future climatic conditions, this species will disperse even wider, that will itself create the problem for native aquatic organisms. The widespread and abundance of this fish which is quite adaptive and plastic to different environmental conditions, will increase its impact on ecosystem services and | Medium    |

| Statistics                                     |             |
|------------------------------------------------|-------------|
| Scores                                         |             |
| <b>BRA</b>                                     | <b>24.0</b> |
| <b>BRA Outcome</b>                             | -           |
| <b>BRA+CCA</b>                                 | <b>34.0</b> |
| <b>BRA+CCA Outcome</b>                         | -           |
| Score partition                                |             |
| <b>A. Biogeography/Historical</b>              | <b>12.0</b> |
| 1. Domestication/Cultivation                   | 4.0         |
| 2. Climate, distribution and introduction risk | 1.0         |
| 3. Invasive elsewhere                          | 7.0         |
| <b>B. Biology/Ecology</b>                      | <b>12.0</b> |
| 4. Undesirable (or persistence) traits         | 9.0         |
| 5. Resource exploitation                       | 2.0         |
| 6. Reproduction                                | 3.0         |
| 7. Dispersal mechanisms                        | 0.0         |
| 8. Tolerance attributes                        | -2.0        |
| <b>C. Climate change</b>                       | <b>10.0</b> |
| 9. Climate change                              | 10.0        |
| Answered Questions                             |             |
| <b>Total</b>                                   | <b>55</b>   |
| <b>A. Biogeography/Historical</b>              | <b>13</b>   |
| 1. Domestication/Cultivation                   | 3           |
| 2. Climate, distribution and introduction risk | 5           |
| 3. Invasive elsewhere                          | 5           |
| <b>B. Biology/Ecology</b>                      | <b>36</b>   |
| 4. Undesirable (or persistence) traits         | 12          |
| 5. Resource exploitation                       | 2           |
| 6. Reproduction                                | 7           |
| 7. Dispersal mechanisms                        | 9           |
| 8. Tolerance attributes                        | 6           |
| <b>C. Climate change</b>                       | <b>6</b>    |
| 9. Climate change                              | 6           |

| Sectors affected                      |               |    |
|---------------------------------------|---------------|----|
|                                       | Commercial    | 12 |
|                                       | Environmental | 7  |
| Species or population nuisance traits |               | 19 |

| Thresholds |         |      |
|------------|---------|------|
|            | BRA     | -    |
|            | BRA+CCA | -    |
| Confidence |         |      |
|            | BRA+CCA | 0.76 |
|            | BRA     | 0.77 |
|            | CCA     | 0.71 |

| Date and Time       |  |
|---------------------|--|
| 21/05/2022 15:21:23 |  |

## AS-ISK v2

| Taxon and Assessor details         |                                                                                                                             |
|------------------------------------|-----------------------------------------------------------------------------------------------------------------------------|
| Category                           | Fishes and Lampreys (freshwater)                                                                                            |
| Taxon name                         | <i>Perca fluviatilis</i>                                                                                                    |
| Common name                        | Eurasian perch                                                                                                              |
| Assessor                           | Bella Japoshvili                                                                                                            |
| Risk screening context             |                                                                                                                             |
| Reason and socio-economic benefits | This is locally translocated, predatory species from west to the east South Caucasus. Now it is                             |
| Risk assessment area               | South Caucasus                                                                                                              |
| Taxonomy                           | Actinopteri (ray-finned fishes) > Perciformes/Percoidae (Perchs) > Percidae (Perches)                                       |
| Native range                       | Europe                                                                                                                      |
| Introduced range                   | Worldwide                                                                                                                   |
| URL                                | <a href="https://www.fishbase.de/summary/Perca-fluviatilis.html">https://www.fishbase.de/summary/Perca-fluviatilis.html</a> |

|                                                |      |                                                                                                                                                                         | Response | Justification (references and/or other information)                                                                                                                                                                                                                                                                            | Confidence |
|------------------------------------------------|------|-------------------------------------------------------------------------------------------------------------------------------------------------------------------------|----------|--------------------------------------------------------------------------------------------------------------------------------------------------------------------------------------------------------------------------------------------------------------------------------------------------------------------------------|------------|
| A. Biogeography/Historical                     |      |                                                                                                                                                                         |          |                                                                                                                                                                                                                                                                                                                                |            |
| 1. Domestication/Cultivation                   |      |                                                                                                                                                                         |          |                                                                                                                                                                                                                                                                                                                                |            |
| 1                                              | 1.01 | Has the taxon been the subject of domestication (or cultivation) for at least 20 generations?                                                                           | Yes      | Douxflis, J., Mandiki, S. N. M., Marotte, G., Wang, N., Silvestre, F., Milla, S., ... & Kestemont, P. (2011). Does domestication process affect stress response in juvenile Eurasian perch <i>Perca fluviatilis</i> ? Comparative Biochemistry and Physiology Part A: Molecular & Integrative Physiology, 159(1), 92-99.       | High       |
| 2                                              | 1.02 | Is the taxon harvested in the wild and likely to be sold or used in its live form?                                                                                      | Yes      | e.g. Rundberg, H. (1977). Trends in harvests of pikeperch ( <i>Stizostedion lucioperca</i> ), eurasian perch ( <i>Perca fluviatilis</i> ), and northern pike ( <i>Esox lucius</i> ) and associated environmental changes in lakes Mälaren and Hjälmaren, 1914–74. Journal of the Fisheries Board of Canada, 34(10), 1720-1724. | Very high  |
| 3                                              | 1.03 | Does the taxon have invasive races, varieties, sub-taxa or congeners?                                                                                                   | No       | No other congeners or specific race is known as invasive                                                                                                                                                                                                                                                                       | Medium     |
| 2. Climate, distribution and introduction risk |      |                                                                                                                                                                         |          |                                                                                                                                                                                                                                                                                                                                |            |
| 4                                              | 2.01 | How similar are the climatic conditions of the Risk Assessment (RA) area and the taxon's native range?                                                                  | High     | Result of climatch algorithm                                                                                                                                                                                                                                                                                                   | Medium     |
| 5                                              | 2.02 | What is the quality of the climate matching data?                                                                                                                       | Low      | Due to low accuracy of local climate data                                                                                                                                                                                                                                                                                      | High       |
| 6                                              | 2.03 | Is the taxon already present outside of captivity in the RA area?                                                                                                       | Yes      | e.g. Kuljanishvili, T., Mumladze, L., Japoshvili, B., Mustafayev, N., Ibrahimov, S., Patoka, J., ... & Kalous, L. (2021). The first unified inventory of non-native fishes of the South Caucasian countries, Armenia, Azerbaijan, and Georgia. Knowledge & Management of Aquatic Ecosystems, (422), 32.                        | Very high  |
| 7                                              | 2.04 | How many potential vectors could the taxon use to enter in the RA area?                                                                                                 | One      | Human mediated dispersal for recreational fisheries                                                                                                                                                                                                                                                                            | High       |
| 8                                              | 2.05 | Is the taxon currently found in close proximity to, and likely to enter into, the RA area in the near future (e.g. unintentional and intentional introductions)?        | Yes      | Kuljanishvili, T., Mumladze, L., Japoshvili, B., Mustafayev, N., Ibrahimov, S., Patoka, J., ... & Kalous, L. (2021). The first unified inventory of non-native fishes of the South Caucasian countries, Armenia, Azerbaijan, and Georgia. Knowledge & Management of Aquatic Ecosystems, (422), 32.                             | Very high  |
| 3. Invasive elsewhere                          |      |                                                                                                                                                                         |          |                                                                                                                                                                                                                                                                                                                                |            |
| 9                                              | 3.01 | Has the taxon become naturalised (established viable populations) outside its native range?                                                                             | Yes      | E.g. Morgan, D. L., Hambleton, S. J., Gill, H. S., & Beatty, S. J. (2002). Distribution, biology and likely impacts of the introduced redbfin perch ( <i>Perca fluviatilis</i> )(Percidae) in Western Australia. Marine and Freshwater Research, 53(8), 1211-1221.                                                             | Very high  |
| 10                                             | 3.02 | In the taxon's introduced range, are there known adverse impacts to wild stocks or commercial taxa?                                                                     | No       | No documented evidence exist                                                                                                                                                                                                                                                                                                   | Low        |
| 11                                             | 3.03 | In the taxon's introduced range, are there known adverse impacts to aquaculture?                                                                                        | Yes      | e.g. Closs, G. P., Ludgate, B., & Goldsmith, R. J. (2001, May). Controlling European perch ( <i>Perca fluviatilis</i> ): lessons from an experimental removal. In Proceedings of the workshop: Managing invasive freshwater fish in New Zealand (pp. 10-12).                                                                   | Medium     |
| 12                                             | 3.04 | In the taxon's introduced range, are there known adverse impacts to ecosystem                                                                                           | No       | No documented evidence exist                                                                                                                                                                                                                                                                                                   | Low        |
| 13                                             | 3.05 | In the taxon's introduced range, are there known adverse socio-economic impacts?                                                                                        | No       | No documented evidence exist                                                                                                                                                                                                                                                                                                   | Low        |
| B. Biology/Ecology                             |      |                                                                                                                                                                         |          |                                                                                                                                                                                                                                                                                                                                |            |
| 4. Undesirable (or persistence) traits         |      |                                                                                                                                                                         |          |                                                                                                                                                                                                                                                                                                                                |            |
| 14                                             | 4.01 | Is it likely that the taxon will be poisonous or pose other risks to human health?                                                                                      | No       | No documented evidence exist                                                                                                                                                                                                                                                                                                   | Low        |
| 15                                             | 4.02 | Is it likely that the taxon will smother one or more native taxa (that are not threatened or protected)?                                                                | Yes      | e.g. No documented evidence exist                                                                                                                                                                                                                                                                                              | Low        |
| 16                                             | 4.03 | Are there any threatened or protected taxa that the non-native taxon would parasitise in the RA area?                                                                   | Yes      | Species is predator and thus can affect a number of fish and invertebrates in RA area                                                                                                                                                                                                                                          | Low        |
| 17                                             | 4.04 | Is the taxon adaptable in terms of climatic and other environmental conditions, thus enhancing its potential persistence if it has invaded or could invade the RA area? | Yes      | Morgan, D. L., Hambleton, S. J., Gill, H. S., & Beatty, S. J. (2002). Distribution, biology and likely impacts of the introduced redbfin perch ( <i>Perca fluviatilis</i> )(Percidae) in Western Australia. Marine and Freshwater Research, 53(8), 1211-1221.                                                                  | Medium     |
| 18                                             | 4.05 | Is the taxon likely to disrupt food-web structure/function in aquatic ecosystems if it has invaded or is likely to invade the RA                                        | No       | No documented evidence exist                                                                                                                                                                                                                                                                                                   | Low        |
| 19                                             | 4.06 | Is the taxon likely to exert adverse impacts on ecosystem services in the RA area?                                                                                      | No       | No documented evidence exist                                                                                                                                                                                                                                                                                                   | Low        |

|                                 |      |                                                                                                                                                                    |     |                                                                                                                                                                                                                                                                                                                                                                                        |           |
|---------------------------------|------|--------------------------------------------------------------------------------------------------------------------------------------------------------------------|-----|----------------------------------------------------------------------------------------------------------------------------------------------------------------------------------------------------------------------------------------------------------------------------------------------------------------------------------------------------------------------------------------|-----------|
| 20                              | 4.07 | Is it likely that the taxon will host, and/or act as a vector for, recognised pests and infectious agents that are endemic in the RA                               | No  | No documented evidence exist                                                                                                                                                                                                                                                                                                                                                           | Low       |
| 21                              | 4.08 | Is it likely that the taxon will host, and/or act as a vector for, recognised pests and infectious agents that are absent from (novel to) the RA area?             | No  | No documented evidence exist. Furthermore, the species is translocated and hosting parasites or infections that are not new for the RA area                                                                                                                                                                                                                                            | Low       |
| 22                              | 4.09 | Is it likely that the taxon will achieve a body size that will make it more likely to be released from captivity?                                                  | Yes | Expected based on professional judgement though no documented evidence exist                                                                                                                                                                                                                                                                                                           | Low       |
| 23                              | 4.10 | Is the taxon capable of sustaining itself in a range of water velocity conditions (e.g. versatile in habitat use)?                                                 | No  | Usually lives in lotic systems or slow moving water                                                                                                                                                                                                                                                                                                                                    | Medium    |
| 24                              | 4.11 | Is it likely that the taxon's mode of existence (e.g. excretion of by-products) or behaviours (e.g. feeding) will reduce habitat quality for native taxa?          | No  | No such an evidence exist                                                                                                                                                                                                                                                                                                                                                              | Low       |
| 25                              | 4.12 | Is the taxon likely to maintain a viable population even when present in low densities (or persisting in adverse conditions by way of a dormant form)?             | No  | No documented evidence exist                                                                                                                                                                                                                                                                                                                                                           | Low       |
| <b>5. Resource exploitation</b> |      |                                                                                                                                                                    |     |                                                                                                                                                                                                                                                                                                                                                                                        |           |
| 26                              | 5.01 | Is the taxon likely to consume threatened or protected native taxa in the RA area?                                                                                 | Yes | It can consume juveniles of any other species including threatened fishes                                                                                                                                                                                                                                                                                                              | Medium    |
| 27                              | 5.02 | Is the taxon likely to sequester food resources (including nutrients) to the detriment of native taxa in the RA area?                                              | No  | No documented evidence exist                                                                                                                                                                                                                                                                                                                                                           | Low       |
| <b>6. Reproduction</b>          |      |                                                                                                                                                                    |     |                                                                                                                                                                                                                                                                                                                                                                                        |           |
| 28                              | 6.01 | Is the taxon likely to exhibit parental care and/or to reduce age-at-maturity in response to environmental conditions?                                             | No  | No such a behavior is registered                                                                                                                                                                                                                                                                                                                                                       | Medium    |
| 29                              | 6.02 | Is the taxon likely to produce viable gametes or propagules (in the RA area)?                                                                                      | Yes | Species is currently a common one in many water bodies in East Georgia. Kuljanishvili, T., Mumladze, L., Japoshvili, B., Mustafayev, N., Ibrahimov, S., Patoka, J., ... & Kalous, L. (2021). The first unified inventory of non-native fishes of the South Caucasian countries, Armenia, Azerbaijan, and Georgia. <i>Knowledge &amp; Management of Aquatic Ecosystems</i> , (422), 32. | Very high |
| 30                              | 6.03 | Is the taxon likely to hybridise naturally with native taxa?                                                                                                       | Yes | Kahilainen KK; Teacher AGF; Kahkonen K; Vinni M; Lehtonen H; Merila J, 2010. First record of natural hybridization and introgression between pikeperch ( <i>Sander lucioperca</i> ) and perch ( <i>Perca fluviatilis</i> ). <i>Ann. Zool. Fenn</i> , 48:39-44.                                                                                                                         | High      |
| 31                              | 6.04 | Is the taxon likely to be hermaphroditic or to display asexual reproduction?                                                                                       | No  | The species is sexually reproducing                                                                                                                                                                                                                                                                                                                                                    | High      |
| 32                              | 6.05 | Is the taxon dependent on the presence of another taxon (or specific habitat features) to complete its life cycle?                                                 | No  | No such dependency is ever recorded                                                                                                                                                                                                                                                                                                                                                    | High      |
| 33                              | 6.06 | Is the taxon known (or likely) to produce a large number of propagules or offspring within a short time span (e.g. < 1 year)?                                      | Yes | Craig, J. F. (2008). Percid fishes: systematics, ecology and exploitation. John Wiley & Sons.                                                                                                                                                                                                                                                                                          | Very high |
| 34                              | 6.07 | How many time units (days, months, years) does the taxon require to reach the age-at-first-reproduction?                                                           | 2   | years                                                                                                                                                                                                                                                                                                                                                                                  | Very high |
| <b>7. Dispersal mechanisms</b>  |      |                                                                                                                                                                    |     |                                                                                                                                                                                                                                                                                                                                                                                        |           |
| 35                              | 7.01 | How many potential internal vectors/pathways could the taxon use to disperse within the RA area (with suitable)                                                    | > 1 | Human mediated translocation for recreational or aquacultural purpose, but also independently                                                                                                                                                                                                                                                                                          | High      |
| 36                              | 7.02 | Will any of these vectors/pathways bring the taxon in close proximity to one or more protected areas (e.g. MCZ, MPA, SSSI)?                                        | No  | In the areas where such protected areas are established, species is native                                                                                                                                                                                                                                                                                                             | Medium    |
| 37                              | 7.03 | Does the taxon have a means of actively attaching itself to hard substrata (e.g. ship hulls, pilings, buoys) such that it enhances the likelihood of dispersal?    | No  | No such an evidence is available                                                                                                                                                                                                                                                                                                                                                       | Very high |
| 38                              | 7.04 | Is natural dispersal of the taxon likely to occur as eggs (for animals) or as propagules (for plants: seeds, spores) in the RA area?                               | No  | Not expected                                                                                                                                                                                                                                                                                                                                                                           | High      |
| 39                              | 7.05 | Is natural dispersal of the taxon likely to occur as larvae/juveniles (for animals) or as fragments/seedlings (for plants) in the RA area?                         | Yes | The larval perch usually dispersing actively through currents. E.g. Craig, J. F. (2008). Percid fishes: systematics, ecology and exploitation. John Wiley & Sons.                                                                                                                                                                                                                      | High      |
| 40                              | 7.06 | Are older life stages of the taxon likely to migrate in the RA area for reproduction?                                                                              | No  | Not expected based on professional judgment                                                                                                                                                                                                                                                                                                                                            | High      |
| 41                              | 7.07 | Are propagules or eggs of the taxon likely to be dispersed in the RA area by other animals?                                                                        | No  | No such an evidence exists                                                                                                                                                                                                                                                                                                                                                             | High      |
| 42                              | 7.08 | Is dispersal of the taxon along any of the vectors/pathways mentioned in the previous seven questions (35-41; i.e. both unintentional or intentional) likely to be | No  | No documented evidence exist                                                                                                                                                                                                                                                                                                                                                           | Low       |
| 43                              | 7.09 | Is dispersal of the taxon density dependent?                                                                                                                       | No  | No documented evidence exist                                                                                                                                                                                                                                                                                                                                                           | Low       |
| <b>8. Tolerance attributes</b>  |      |                                                                                                                                                                    |     |                                                                                                                                                                                                                                                                                                                                                                                        |           |
| 44                              | 8.01 | Is the taxon able to withstand being out of water for extended periods (e.g. minimum of one or more hours) at some stage of its life cycle?                        | No  | No such an evidence exists                                                                                                                                                                                                                                                                                                                                                             | Medium    |

|                          |      |                                                                                                                                                                              |           |                                 |        |
|--------------------------|------|------------------------------------------------------------------------------------------------------------------------------------------------------------------------------|-----------|---------------------------------|--------|
| 45                       | 8.02 | Is the taxon tolerant of a wide range of water quality conditions relevant to that taxon? [In the Justification field, indicate the relevant water quality variable(s) being | No        | No documented evidence exists   | Low    |
| 46                       | 8.03 | Can the taxon be controlled or eradicated in the wild with chemical, biological, or other agents/means?                                                                      | No        | No documented evidence exists   | Low    |
| 47                       | 8.04 | Is the taxon likely to tolerate or benefit from environmental/human disturbance?                                                                                             | No        | No such fact have been reported | Low    |
| 48                       | 8.05 | Is the taxon able to tolerate salinity levels that are higher or lower than those found in its usual environment?                                                            | No        | No such an evidnece exists      | Medium |
| 49                       | 8.06 | Are there effective natural enemies (predators) of the taxon present in the RA                                                                                               | No        | Based on professional judgement | High   |
| <b>C. Climate change</b> |      |                                                                                                                                                                              |           |                                 |        |
| <b>9. Climate change</b> |      |                                                                                                                                                                              |           |                                 |        |
| 50                       | 9.01 | Under the predicted future climatic conditions, are the risks of entry into the RA area posed by the taxon likely to increase, decrease or not change?                       | No change | Based on professional judgement | Medium |
| 51                       | 9.02 | Under the predicted future climatic conditions, are the risks of establishment posed by the taxon likely to increase, decrease or not change?                                | Increase  | Based on professional judgement | Medium |
| 52                       | 9.03 | Under the predicted future climatic conditions, are the risks of dispersal within the RA area posed by the taxon likely to increase, decrease or not change?                 | No change | Based on professional judgement | Low    |
| 53                       | 9.04 | Under the predicted future climatic conditions, what is the likely magnitude of future potential impacts on biodiversity and/or ecological integrity/status?                 | Higher    | Based on professional judgement | Low    |
| 54                       | 9.05 | Under the predicted future climatic conditions, what is the likely magnitude of future potential impacts on ecosystem structure and/or function?                             | Higher    | Based on professional judgement | Low    |
| 55                       | 9.06 | Under the predicted future climatic conditions, what is the likely magnitude of future potential impacts on ecosystem services/socio-economic factors?                       | No change | Based on professional judgement | Low    |

| Statistics                                     |             |
|------------------------------------------------|-------------|
| Scores                                         |             |
| <b>BRA</b>                                     | <b>17.0</b> |
| <b>BRA Outcome</b>                             | -           |
| <b>BRA+CCA</b>                                 | <b>23.0</b> |
| <b>BRA+CCA Outcome</b>                         | -           |
| Score partition                                |             |
| <b>A. Biogeography/Historical</b>              | <b>9.0</b>  |
| 1. Domestication/Cultivation                   | 2.0         |
| 2. Climate, distribution and introduction risk | 1.0         |
| 3. Invasive elsewhere                          | 6.0         |
| <b>B. Biology/Ecology</b>                      | <b>8.0</b>  |
| 4. Undesirable (or persistence) traits         | 4.0         |
| 5. Resource exploitation                       | 5.0         |
| 6. Reproduction                                | 3.0         |
| 7. Dispersal mechanisms                        | -2.0        |
| 8. Tolerance attributes                        | -2.0        |
| <b>C. Climate change</b>                       | <b>6.0</b>  |
| 9. Climate change                              | 6.0         |
| Answered Questions                             |             |
| <b>Total</b>                                   | <b>55</b>   |
| <b>A. Biogeography/Historical</b>              | <b>13</b>   |
| 1. Domestication/Cultivation                   | 3           |
| 2. Climate, distribution and introduction risk | 5           |
| 3. Invasive elsewhere                          | 5           |
| <b>B. Biology/Ecology</b>                      | <b>36</b>   |
| 4. Undesirable (or persistence) traits         | 12          |
| 5. Resource exploitation                       | 2           |
| 6. Reproduction                                | 7           |
| 7. Dispersal mechanisms                        | 9           |
| 8. Tolerance attributes                        | 6           |
| <b>C. Climate change</b>                       | <b>6</b>    |
| 9. Climate change                              | 6           |
| Sectors affected                               |             |
| <b>Commercial</b>                              | <b>9</b>    |
| <b>Environmental</b>                           | <b>9</b>    |
| <b>Species or population nuisance traits</b>   | <b>7</b>    |

| Thresholds     |             |
|----------------|-------------|
| <b>BRA</b>     | -           |
| <b>BRA+CCA</b> | -           |
| Confidence     |             |
| <b>BRA+CCA</b> | <b>0.52</b> |
| <b>BRA</b>     | <b>0.55</b> |

|     |      |
|-----|------|
| CCA | 0.33 |
|-----|------|

|                     |
|---------------------|
| Date and Time       |
| 16/05/2022 21:32:03 |

## AS-ISK v2

| Taxon and Assessor details         |                                                                                                                             |
|------------------------------------|-----------------------------------------------------------------------------------------------------------------------------|
| Category                           | Fishes and Lampreys (freshwater)                                                                                            |
| Taxon name                         | <i>Perca fluviatilis</i>                                                                                                    |
| Common name                        | Eurasian perch                                                                                                              |
| Assessor                           | Giorgi Epitashvili                                                                                                          |
| Risk screening context             |                                                                                                                             |
| Reason and socio-economic benefits | The Eurasian perch <i>Perca fluviatilis</i> is an important fish species in both commercial and                             |
| Risk assessment area               | South Caucasus                                                                                                              |
| Taxonomy                           | <i>Perca fluviatilis</i> Linnaeus, 1758                                                                                     |
| Native range                       | Eurasia: throughout Europe to northernmost extremity of Scandinavia, except Iberian Peninsula,                              |
| Introduced range                   | Widely introduced. Several countries report adverse ecological impact after introduction.                                   |
| URL                                | <a href="https://www.fishbase.se/summary/perca-fluviatilis.html">https://www.fishbase.se/summary/perca-fluviatilis.html</a> |

|                                                       |      |                                                                                                                                                                         | Response | Justification (references and/or other information)                                                                                                                                                                                                                                                                                                                                                             | Confidence |
|-------------------------------------------------------|------|-------------------------------------------------------------------------------------------------------------------------------------------------------------------------|----------|-----------------------------------------------------------------------------------------------------------------------------------------------------------------------------------------------------------------------------------------------------------------------------------------------------------------------------------------------------------------------------------------------------------------|------------|
| <b>A. Biogeography/Historical</b>                     |      |                                                                                                                                                                         |          |                                                                                                                                                                                                                                                                                                                                                                                                                 |            |
| <b>1. Domestication/Cultivation</b>                   |      |                                                                                                                                                                         |          |                                                                                                                                                                                                                                                                                                                                                                                                                 |            |
| 1                                                     | 1.01 | Has the taxon been the subject of domestication (or cultivation) for at least 20 generations?                                                                           | Yes      | The farming of percids (Eurasian perch <i>Perca fluviatilis</i> , pikeperch <i>Sander lucioperca</i> ) has progressively become a diversification path of European inland aquaculture in the past 25 years. This required the domestication of wild or pseudowild (coming from polyculture ponds) populations (Fontaine and Teletchea 2019).                                                                    | Very high  |
| 2                                                     | 1.02 | Is the taxon harvested in the wild and likely to be sold or used in its live form?                                                                                      | Yes      | For instance total farmed perch production in 2005 was 315 tonnes (FAO 2007 stats).                                                                                                                                                                                                                                                                                                                             | Very high  |
| 3                                                     | 1.03 | Does the taxon have invasive races, varieties, sub-taxa or congeners?                                                                                                   | Yes      | Several countries have reported adverse ecological impacts after the introduction of <i>P. fluviatilis</i> (Froese and Pauly, 2011). One such example is in the Murray-Darling Basin, South Australia, where it is considered a threat to native fish species.                                                                                                                                                  | Very high  |
| <b>2. Climate, distribution and introduction risk</b> |      |                                                                                                                                                                         |          |                                                                                                                                                                                                                                                                                                                                                                                                                 |            |
| 4                                                     | 2.01 | How similar are the climatic conditions of the Risk Assessment (RA) area and the taxon's native range?                                                                  | High     | <i>P. fluviatilis</i> is naturally distributed in the South Caucasus Region (Kuljanishvili et al. 2020; Epitashvili et al. 2020) and actively translocated within the region by fishermen. Therefore climatic conditions for this species within the region is more or less                                                                                                                                     | Very high  |
| 5                                                     | 2.02 | What is the quality of the climate matching data?                                                                                                                       | High     | Köppen-Geiger climate classification map                                                                                                                                                                                                                                                                                                                                                                        | High       |
| 6                                                     | 2.03 | Is the taxon already present outside of captivity in the RA area?                                                                                                       | Yes      | <i>P. fluviatilis</i> is naturally distributed in the South Caucasus Region (Kuljanishvili et al. 2020; Epitashvili et al. 2020) and actively translocated within the region by fishermen.                                                                                                                                                                                                                      | Very high  |
| 7                                                     | 2.04 | How many potential vectors could the taxon use to enter in the RA area?                                                                                                 | One      | <i>P. fluviatilis</i> is actively translocated within the Caucasus Region by fishermen                                                                                                                                                                                                                                                                                                                          | High       |
| 8                                                     | 2.05 | Is the taxon currently found in close proximity to, and likely to enter into, the RA area in the near future (e.g. unintentional and intentional introductions)?        | Yes      | There are three species, <i>Perca fluviatilis</i> , <i>Sander lucioperca</i> and <i>S. marinus</i> , found naturally in the Caspian Sea basin of Iran (Coad 2016)                                                                                                                                                                                                                                               | Very high  |
| <b>3. Invasive elsewhere</b>                          |      |                                                                                                                                                                         |          |                                                                                                                                                                                                                                                                                                                                                                                                                 |            |
| 9                                                     | 3.01 | Has the taxon become naturalised (established viable populations) outside its native range?                                                                             | Yes      | There is a long history of intentional introductions of this species for sustenance and sport fishing. Many of those introductions have resulted in established wild populations.                                                                                                                                                                                                                               | Very high  |
| 10                                                    | 3.02 | In the taxon's introduced range, are there known adverse impacts to wild stocks or commercial taxa?                                                                     | Yes      | One such example is in the Murray-Darling Basin, South Australia, where <i>P. fluviatilis</i> considered as threat to native fish species.                                                                                                                                                                                                                                                                      | Very high  |
| 11                                                    | 3.03 | In the taxon's introduced range, are there known adverse impacts to aquaculture?                                                                                        | No       | No data                                                                                                                                                                                                                                                                                                                                                                                                         | Low        |
| 12                                                    | 3.04 | In the taxon's introduced range, are there known adverse impacts to ecosystem services?                                                                                 | Yes      | <i>P. fluviatilis</i> has negative impact on the local biodiversity and therefore ecosystem services. Example of this are Tbilisi Reservoir where <i>P. fluviatilis</i> was released by fishermen and currently this fish become dominant species in the reservoir. This has a negative impact on recreational fishing as other species are currently less available because of this species (Own observation). | Very high  |
| 13                                                    | 3.05 | In the taxon's introduced range, are there known adverse socio-economic impacts?                                                                                        | Yes      | <i>Perca fluviatilis</i> has the potential for moderate socio-economic impact if introduced to the Great Lakes. <i>P. fluviatilis</i> may prey on native species and trout, negatively affecting recreational fisheries. Within a 72-hour period, <i>P. fluviatilis</i> eliminated 20,000 newly released rainbow trout fry from a reservoir in south-western Australia (NSW DPI 2012).                          | High       |
| <b>B. Biology/Ecology</b>                             |      |                                                                                                                                                                         |          |                                                                                                                                                                                                                                                                                                                                                                                                                 |            |
| <b>4. Undesirable (or persistence) traits</b>         |      |                                                                                                                                                                         |          |                                                                                                                                                                                                                                                                                                                                                                                                                 |            |
| 14                                                    | 4.01 | Is it likely that the taxon will be poisonous or pose other risks to human health?                                                                                      | No       | This species does not pose a threat to humans                                                                                                                                                                                                                                                                                                                                                                   | High       |
| 15                                                    | 4.02 | Is it likely that the taxon will smother one or more native taxa (that are not threatened or protected)?                                                                | Yes      | <i>P. fluviatilis</i> is a predator species and harms local species.                                                                                                                                                                                                                                                                                                                                            | Very high  |
| 16                                                    | 4.03 | Are there any threatened or protected taxa that the non-native taxon would parasitise in the RA area?                                                                   | Yes      | <i>P. fluviatilis</i> is a predator species and harms local threatened and protected species in the Caucasus region such as <i>Salmo</i> spp; <i>Acipenser</i> spp, <i>Luciobarbus capito</i> , etc (Own observation).                                                                                                                                                                                          | Very high  |
| 17                                                    | 4.04 | Is the taxon adaptable in terms of climatic and other environmental conditions, thus enhancing its potential persistence if it has invaded or could invade the RA area? | Yes      | <i>P. fluviatilis</i> is naturally distributed in the South Caucasus Region (Kuljanishvili et al. 2020; Epitashvili et al. 2020) and actively translocated within the region by fishermen. Therefore climatic conditions for this species within the region is more or less                                                                                                                                     | Very high  |
| 18                                                    | 4.05 | Is the taxon likely to disrupt food-web structure/function in aquatic ecosystems if it has invaded or is likely to invade the RA                                        | Yes      | Such example is in the Murray-Darling Basin, South Australia, where <i>P. fluviatilis</i> considered as threat to native fish species. Such a fact is already noticeable in the Tbilisi Reservoir (Own                                                                                                                                                                                                          | Very high  |



|                                 |      |                                                                                                                                                                    |                |                                                                                                                                                                                                                                                                                                                                                                                                               |           |
|---------------------------------|------|--------------------------------------------------------------------------------------------------------------------------------------------------------------------|----------------|---------------------------------------------------------------------------------------------------------------------------------------------------------------------------------------------------------------------------------------------------------------------------------------------------------------------------------------------------------------------------------------------------------------|-----------|
| 19                              | 4.06 | Is the taxon likely to exert adverse impacts on ecosystem services in the RA area?                                                                                 | Yes            | P. fluviatilis has negative impact on the local biodiversity and therefore ecosystem services. Example of this are Tbilisi Reservoir where P. fluviatilis was translocated and released by fishermen and currently this fish become dominant species in the reservoir. This has a negative impact on recreational fishing as other species are currently less available because of this species (Own          | High      |
| 20                              | 4.07 | Is it likely that the taxon will host, and/or act as a vector for, recognised pests and infectious agents that are endemic in the RA                               | Not applicable | Data deficiencies                                                                                                                                                                                                                                                                                                                                                                                             | Low       |
| 21                              | 4.08 | Is it likely that the taxon will host, and/or act as a vector for, recognised pests and infectious agents that are absent from (novel to) the RA area?             | Not applicable | Data deficiencies                                                                                                                                                                                                                                                                                                                                                                                             | Low       |
| 22                              | 4.09 | Is it likely that the taxon will achieve a body size that will make it more likely to be released from captivity?                                                  | Yes            | Maximum length of P. fluviatilis is 60 cm, weight 5 kg. Therefore this species is one of the main object to aquaculture.                                                                                                                                                                                                                                                                                      | Very high |
| 23                              | 4.10 | Is the taxon capable of sustaining itself in a range of water velocity conditions (e.g. versatile in habitat use)?                                                 | Yes            | Inhabits a very wide range of habitats from estuarine lagoons, lakes of all types to medium-sized streams. Feeding larvae occur in open water.                                                                                                                                                                                                                                                                | Medium    |
| 24                              | 4.11 | Is it likely that the taxon's mode of existence (e.g. excretion of by-products) or behaviours (e.g. feeding) will reduce habitat quality for native taxa?          | Not applicable | Data deficiencies                                                                                                                                                                                                                                                                                                                                                                                             | Low       |
| 25                              | 4.12 | Is the taxon likely to maintain a viable population even when present in low densities (or persisting in adverse conditions by way of a dormant form)?             | Yes            | In the Tbilisi reservoir P. fluviatilis were released in low numbers and it was able to reproduced itself and today it is one of the most numerous species in this reservoir.                                                                                                                                                                                                                                 | High      |
| <b>5. Resource exploitation</b> |      |                                                                                                                                                                    |                |                                                                                                                                                                                                                                                                                                                                                                                                               |           |
| 26                              | 5.01 | Is the taxon likely to consume threatened or protected native taxa in the RA area?                                                                                 | Yes            | This species is predator and can consume local endemic species such as Salmo spp, Acipenser spp and etc. (Own observation).                                                                                                                                                                                                                                                                                   | Very high |
| 27                              | 5.02 | Is the taxon likely to sequester food resources (including nutrients) to the detriment of native taxa in the RA area?                                              | Yes            | This fish is a predator and competitor species for native taxa within its introduced/translocated ranges of the South Caucasus Region.                                                                                                                                                                                                                                                                        | High      |
| <b>6. Reproduction</b>          |      |                                                                                                                                                                    |                |                                                                                                                                                                                                                                                                                                                                                                                                               |           |
| 28                              | 6.01 | Is the taxon likely to exhibit parental care and/or to reduce age-at-maturity in response to environmental conditions?                                             | Not applicable | Data deficiencies                                                                                                                                                                                                                                                                                                                                                                                             | Low       |
| 29                              | 6.02 | Is the taxon likely to produce viable gametes or propagules (in the RA area)?                                                                                      | Yes            | This species naturally breeds in the Southern Caucasus Region (Ninua et al. 2013; Kuljanishvili et al. 2020)                                                                                                                                                                                                                                                                                                  | Very high |
| 30                              | 6.03 | Is the taxon likely to hybridise naturally with native taxa?                                                                                                       | Yes            | A case of natural hybridization between pikeperch (Sander lucioperca) and perch (Perca fluviatilis) was confirmed in Finland based on the intermediate morphological, anatomical and genetic characteristics of the hybrid. Micro satellite analyses ruled out the possibility that the focal individual was of either pure species, and indicated it was a S. lucioperca backcross (Kahilainen et al. 2011). | High      |
| 31                              | 6.04 | Is the taxon likely to be hermaphroditic or to display asexual reproduction?                                                                                       | Yes            | Chevey (1922) recorded a specimen of P. fluviatilis which had undergone a sex reversal from male to female (Jellyman 1976).                                                                                                                                                                                                                                                                                   | High      |
| 32                              | 6.05 | Is the taxon dependent on the presence of another taxon (or specific habitat features) to complete its life cycle?                                                 | No             | No such a study has been conducted                                                                                                                                                                                                                                                                                                                                                                            | Medium    |
| 33                              | 6.06 | Is the taxon known (or likely) to produce a large number of propagules or offspring within a short time span (e.g. < 1 year)?                                      | Yes            | Fecundity of P. fluviatilis varies from 12000 to 900 000 eggs (Ninua et al. 2013)                                                                                                                                                                                                                                                                                                                             | High      |
| 34                              | 6.07 | How many time units (days, months, years) does the taxon require to reach the age-at-first-reproduction?                                                           | 2              | The species becomes mature at the age of 2-3 years.                                                                                                                                                                                                                                                                                                                                                           | High      |
| <b>7. Dispersal mechanisms</b>  |      |                                                                                                                                                                    |                |                                                                                                                                                                                                                                                                                                                                                                                                               |           |
| 35                              | 7.01 | How many potential internal vectors/pathways could the taxon use to disperse within the RA area (with suitable                                                     | >1             | This species is distributed naturally and artificially through translocation in the Caucasus region.                                                                                                                                                                                                                                                                                                          | Very high |
| 36                              | 7.02 | Will any of these vectors/pathways bring the taxon in close proximity to one or more protected areas (e.g. MCZ, MPA, SSSI)?                                        | Yes            | P. fluviatilis is naturally distributed within the protected areas in the Caucasus region (e.g. Kolikheti National Park; Kobuleti Managed Reserve etc.) and may spread to other protected areas that are not in its natural range.                                                                                                                                                                            | High      |
| 37                              | 7.03 | Does the taxon have a means of actively attaching itself to hard substrata (e.g. ship hulls, pilings, buoys) such that it enhances the likelihood of dispersal?    | No             | This species does not has such means.                                                                                                                                                                                                                                                                                                                                                                         | High      |
| 38                              | 7.04 | Is natural dispersal of the taxon likely to occur as eggs (for animals) or as propagules (for plants: seeds, spores) in the RA area?                               | Yes            | This species naturally reproduces in the SC region (Ninua et al. 2013; Kuljanishvili et al. 2020).                                                                                                                                                                                                                                                                                                            | High      |
| 39                              | 7.05 | Is natural dispersal of the taxon likely to occur as larvae/juveniles (for animals) or as fragments/seedlings (for plants) in the RA area?                         | Yes            | This species naturally reproduces in the SC region (Ninua et al. 2013; Kuljanishvili et al. 2020).                                                                                                                                                                                                                                                                                                            | High      |
| 40                              | 7.06 | Are older life stages of the taxon likely to migrate in the RA area for reproduction?                                                                              | Yes            | This species reproduces naturally within the Caucasus region (Kuljanishvili et al. 2020).                                                                                                                                                                                                                                                                                                                     | High      |
| 41                              | 7.07 | Are propagules or eggs of the taxon likely to be dispersed in the RA area by other animals?                                                                        | Yes            | This species is mostly distributed by humans in the region although it is expected that various animals will also disperse its                                                                                                                                                                                                                                                                                | High      |
| 42                              | 7.08 | Is dispersal of the taxon along any of the vectors/pathways mentioned in the previous seven questions (35-41; i.e. both unintentional or intentional) likely to be | Yes            | Sometimes this species is kept on fish farms and then released to a new location.                                                                                                                                                                                                                                                                                                                             | Medium    |
| 43                              | 7.09 | Is dispersal of the taxon density dependent?                                                                                                                       | Yes            | Own judgement                                                                                                                                                                                                                                                                                                                                                                                                 | Medium    |
| <b>8. Tolerance attributes</b>  |      |                                                                                                                                                                    |                |                                                                                                                                                                                                                                                                                                                                                                                                               |           |

|    |      |                                                                                                                                                                              |     |                                                                                                                                                                                                          |           |
|----|------|------------------------------------------------------------------------------------------------------------------------------------------------------------------------------|-----|----------------------------------------------------------------------------------------------------------------------------------------------------------------------------------------------------------|-----------|
| 44 | 8.01 | Is the taxon able to withstand being out of water for extended periods (e.g. minimum of one or more hours) at some stage of its life cycle?                                  | No  | No such fact is known                                                                                                                                                                                    | Medium    |
| 45 | 8.02 | Is the taxon tolerant of a wide range of water quality conditions relevant to that taxon? [In the Justification field, indicate the relevant water quality variable(s) being | Yes | <i>P. fluviatilis</i> inhabits a very wide range of habitats from estuarine lagoons, lakes of all types to medium-sized streams. Feeding larvae occur in open water.                                     | High      |
| 46 | 8.03 | Can the taxon be controlled or eradicated in the wild with chemical, biological, or other agents/means?                                                                      | No  | Perch are particularly susceptible to the epizootic haematopoietic necrosisvirus (EHN) (Bucke et al. 1979). However, this virus is unlikely to prove useful in the control of perch (Closs et al. 2001). | Medium    |
| 47 | 8.04 | Is the taxon likely to tolerate or benefit from environmental/human disturbance?                                                                                             | Yes | Often this species is spread by humans                                                                                                                                                                   | High      |
| 48 | 8.05 | Is the taxon able to tolerate salinity levels that are higher or lower than those found in its usual environment?                                                            | Yes | Inhabits a very wide range of habitats from estuarine lagoons, lakes of all types to medium-sized streams. Feeding larvae occur in open water.                                                           | Very high |
| 49 | 8.06 | Are there effective natural enemies (predators) of the taxon present in the RA area?                                                                                         | Yes | There are several predators in the SC region which can eat this fish : <i>Salmo</i> spp; <i>Esox lucius</i> , <i>Silurus glanis</i> , <i>Sander lucioperca</i> , etc (Kulianishvili et al. 2020).        | High      |

#### C. Climate change

##### 9. Climate change

|    |      |                                                                                                                                                              |          |                                                                              |        |
|----|------|--------------------------------------------------------------------------------------------------------------------------------------------------------------|----------|------------------------------------------------------------------------------|--------|
| 50 | 9.01 | Under the predicted future climatic conditions, are the risks of entry into the RA area posed by the taxon likely to increase, decrease or not change?       | Increase | This species has potential to increase its range within the Caucasus region. | Medium |
| 51 | 9.02 | Under the predicted future climatic conditions, are the risks of establishment posed by the taxon likely to increase, decrease or not change?                | Increase | This species has potential to increase its range within the Caucasus region. | Medium |
| 52 | 9.03 | Under the predicted future climatic conditions, are the risks of dispersal within the RA area posed by the taxon likely to increase, decrease or not change? | Increase | This species has potential to increase its range within the Caucasus region. | Medium |
| 53 | 9.04 | Under the predicted future climatic conditions, what is the likely magnitude of future potential impacts on biodiversity and/or ecological integrity/status? | Higher   | Own judgement                                                                | High   |
| 54 | 9.05 | Under the predicted future climatic conditions, what is the likely magnitude of future potential impacts on ecosystem structure and/or function?             | Higher   | Own judgement                                                                | Medium |
| 55 | 9.06 | Under the predicted future climatic conditions, what is the likely magnitude of future potential impacts on ecosystem services/socio-economic factors?       | Higher   | Own judgement                                                                | Medium |

| Statistics                                     |             |
|------------------------------------------------|-------------|
| Scores                                         |             |
| <b>BRA</b>                                     | <b>51.0</b> |
| <b>BRA Outcome</b>                             | <b>-</b>    |
| <b>BRA+CCA</b>                                 | <b>63.0</b> |
| <b>BRA+CCA Outcome</b>                         | <b>-</b>    |
| Score partition                                |             |
| <b>A. Biogeography/Historical</b>              | <b>19.0</b> |
| 1. Domestication/Cultivation                   | 4.0         |
| 2. Climate, distribution and introduction risk | 1.0         |
| 3. Invasive elsewhere                          | 14.0        |
| <b>B. Biology/Ecology</b>                      | <b>32.0</b> |
| 4. Undesirable (or persistence) traits         | 8.0         |
| 5. Resource exploitation                       | 7.0         |
| 6. Reproduction                                | 5.0         |
| 7. Dispersal mechanisms                        | 7.0         |
| 8. Tolerance attributes                        | 5.0         |
| <b>C. Climate change</b>                       | <b>12.0</b> |
| 9. Climate change                              | 12.0        |
| Answered Questions                             |             |
| <b>Total</b>                                   | <b>55</b>   |
| <b>A. Biogeography/Historical</b>              | <b>13</b>   |
| 1. Domestication/Cultivation                   | 3           |
| 2. Climate, distribution and introduction risk | 5           |
| 3. Invasive elsewhere                          | 5           |
| <b>B. Biology/Ecology</b>                      | <b>36</b>   |
| 4. Undesirable (or persistence) traits         | 12          |
| 5. Resource exploitation                       | 2           |
| 6. Reproduction                                | 7           |
| 7. Dispersal mechanisms                        | 9           |
| 8. Tolerance attributes                        | 6           |
| <b>C. Climate change</b>                       | <b>6</b>    |
| 9. Climate change                              | 6           |
| Sectors affected                               |             |
| <b>Commercial</b>                              | <b>16</b>   |
| <b>Environmental</b>                           | <b>16</b>   |
| <b>Species or population nuisance traits</b>   | <b>35</b>   |

#### Thresholds

|            |         |      |
|------------|---------|------|
|            | BRA     | -    |
|            | BRA+CCA | -    |
| Confidence |         |      |
|            | BRA+CCA | 0.74 |
|            | BRA     | 0.76 |
|            | CCA     | 0.54 |

|                     |  |
|---------------------|--|
| Date and Time       |  |
| 13/05/2022 14:54:56 |  |

## AS-ISK v2

| Taxon and Assessor details         |                                                                                                                               |
|------------------------------------|-------------------------------------------------------------------------------------------------------------------------------|
| Category                           | Fishes and Lampreys (freshwater)                                                                                              |
| Taxon name                         | <i>Perca fluviatilis</i>                                                                                                      |
| Common name                        | Eurasian perch                                                                                                                |
| Assessor                           | Tatia Kuljanishvili                                                                                                           |
| Risk screening context             |                                                                                                                               |
| Reason and socio-economic benefits | Translocated from the west Georgia to the east.                                                                               |
| Risk assessment area               | South Caucasus                                                                                                                |
| Taxonomy                           | Actinopteri (ray-finned fishes) > Perciformes/Percoidei () > Percidae (Perches) >                                             |
| Native range                       | The Black Sea basin                                                                                                           |
| Introduced range                   | The Kura River Basin                                                                                                          |
| URL                                | <a href="https://fishbase.mnhn.fr/summary/Perca-fluviatilis.html">https://fishbase.mnhn.fr/summary/Perca-fluviatilis.html</a> |

|                                                |      | Response                                                                                                                                                                | Justification (references and/or other information) | Confidence                                                                                                                                                 |           |
|------------------------------------------------|------|-------------------------------------------------------------------------------------------------------------------------------------------------------------------------|-----------------------------------------------------|------------------------------------------------------------------------------------------------------------------------------------------------------------|-----------|
| A. Biogeography/Historical                     |      |                                                                                                                                                                         |                                                     |                                                                                                                                                            |           |
| 1. Domestication/Cultivation                   |      |                                                                                                                                                                         |                                                     |                                                                                                                                                            |           |
| 1                                              | 1.01 | Has the taxon been the subject of domestication (or cultivation) for at least 20 generations?                                                                           | Yes                                                 | It has fisheries value                                                                                                                                     | Medium    |
| 2                                              | 1.02 | Is the taxon harvested in the wild and likely to be sold or used in its live form?                                                                                      | Yes                                                 | Yes. It has value for commercial, aquaculture and recreational fisheries                                                                                   | Very high |
| 3                                              | 1.03 | Does the taxon have invasive races, varieties, sub-taxa or congeners?                                                                                                   | Yes                                                 | Ruffe Gymnocephalus cernua                                                                                                                                 | High      |
| 2. Climate, distribution and introduction risk |      |                                                                                                                                                                         |                                                     |                                                                                                                                                            |           |
| 4                                              | 2.01 | How similar are the climatic conditions of the Risk Assessment (RA) area and the taxon's native range?                                                                  | High                                                | It is somehow similar                                                                                                                                      | Medium    |
| 5                                              | 2.02 | What is the quality of the climate matching data?                                                                                                                       | Low                                                 | There are no climatic stations in climatch to make this analysis. However, according to Koppen-Geiger map the climate is somehow similar.                  | Medium    |
| 6                                              | 2.03 | Is the taxon already present outside of captivity in the RA area?                                                                                                       | Yes                                                 | It is commonly distributed in many eastern Georgian water bodies such as the Algeti and Tbilisi Reservoirs, Baret, Bazaleti, Lisi, Turtle, and other lakes | Very high |
| 7                                              | 2.04 | How many potential vectors could the taxon use to enter in the RA area?                                                                                                 | >1                                                  | Fisheries; Recreational fisheries                                                                                                                          | Very high |
| 8                                              | 2.05 | Is the taxon currently found in close proximity to, and likely to enter into, the RA area in the near future (e.g. unintentional and intentional introductions)?        | Yes                                                 | It is commonly distributed in many eastern Georgian water bodies such as the Algeti and Tbilisi Reservoirs, Baret, Bazaleti, Lisi, Turtle, and other lakes | Very high |
| 3. Invasive elsewhere                          |      |                                                                                                                                                                         |                                                     |                                                                                                                                                            |           |
| 9                                              | 3.01 | Has the taxon become naturalised (established viable populations) outside its introduced range?                                                                         | Yes                                                 | Yes it has become naturalized outside its native area                                                                                                      | Very high |
| 10                                             | 3.02 | In the taxon's introduced range, are there known adverse impacts to wild stocks or commercial taxa?                                                                     | No                                                  | It is not known but we may assume that it has great impact since its diet, that consumes any available prey.                                               | Low       |
| 11                                             | 3.03 | In the taxon's introduced range, are there known adverse impacts to aquaculture?                                                                                        | No                                                  | It is not known but we may assume that it has great impact since its diet, that consumes any available prey.                                               | Low       |
| 12                                             | 3.04 | In the taxon's introduced range, are there known adverse impacts to ecosystem?                                                                                          | Yes                                                 | Can affect production of food (trade important coregonids); can be transmitting diseases.                                                                  | High      |
| 13                                             | 3.05 | In the taxon's introduced range, are there known adverse socio-economic impacts?                                                                                        | No                                                  | Not known                                                                                                                                                  | Medium    |
| B. Biology/Ecology                             |      |                                                                                                                                                                         |                                                     |                                                                                                                                                            |           |
| 4. Undesirable (or persistence) traits         |      |                                                                                                                                                                         |                                                     |                                                                                                                                                            |           |
| 14                                             | 4.01 | Is it likely that the taxon will be poisonous or pose other risks to human health?                                                                                      | No                                                  | Not poisonous                                                                                                                                              | Very high |
| 15                                             | 4.02 | Is it likely that the taxon will smother one or more native taxa (that are not threatened or protected)?                                                                | No                                                  | No information available                                                                                                                                   | High      |
| 16                                             | 4.03 | Are there any threatened or protected taxa that the non-native taxon would parasitise in the RA area?                                                                   | No                                                  | Does not parasite                                                                                                                                          | Very high |
| 17                                             | 4.04 | Is the taxon adaptable in terms of climatic and other environmental conditions, thus enhancing its potential persistence if it has invaded or could invade the RA area? | Yes                                                 | Inhabits a very wide range of habitats from estuarine lagoons, lakes of all types to medium-sized streams.                                                 | Medium    |
| 18                                             | 4.05 | Is the taxon likely to disrupt food-web structure/function in aquatic ecosystems if it has invaded or is likely to invade the RA area?                                  | No                                                  | Not documented                                                                                                                                             | Medium    |
| 19                                             | 4.06 | Is the taxon likely to exert adverse impacts on ecosystem services in the RA area?                                                                                      | No                                                  | No adverse impacts on ecosystem services have been documented                                                                                              | Medium    |
| 20                                             | 4.07 | Is it likely that the taxon will host, and/or act as a vector for, recognised pests and infectious agents that are endemic in the RA area?                              | Yes                                                 | Yes it is possible                                                                                                                                         | Medium    |
| 21                                             | 4.08 | Is it likely that the taxon will host, and/or act as a vector for, recognised pests and infectious agents that are absent from (novel to) the RA area?                  | Yes                                                 | It is possible                                                                                                                                             | Low       |
| 22                                             | 4.09 | Is it likely that the taxon will achieve a body size that will make it more likely to be released from captivity?                                                       | Yes                                                 | Yes. See: <a href="https://fishbase.mnhn.fr/summary/Perca-fluviatilis.html">https://fishbase.mnhn.fr/summary/Perca-fluviatilis.html</a>                    | High      |
| 23                                             | 4.10 | Is the taxon capable of sustaining itself in a range of water velocity conditions (e.g. versatile in habitat use)?                                                      | Yes                                                 | Inhabits a very wide range of habitats from estuarine lagoons, lakes of all types to medium-sized streams.                                                 | Very high |

|                                 |      |                                                                                                                                                                              |          |                                                                                                                                                                                                                                                    |           |
|---------------------------------|------|------------------------------------------------------------------------------------------------------------------------------------------------------------------------------|----------|----------------------------------------------------------------------------------------------------------------------------------------------------------------------------------------------------------------------------------------------------|-----------|
| 24                              | 4.11 | Is it likely that the taxon's mode of existence (e.g. excretion of by-products) or behaviours (e.g. feeding) will reduce habitat quality for native taxa?                    | No       | No info                                                                                                                                                                                                                                            | Low       |
| 25                              | 4.12 | Is the taxon likely to maintain a viable population even when present in low densities (or persisting in adverse conditions by way of a dormant form)?                       | Yes      | No. Morphologically this species does not have a means of actively attaching itself to hard substrata                                                                                                                                              | High      |
| <b>5. Resource exploitation</b> |      |                                                                                                                                                                              |          |                                                                                                                                                                                                                                                    |           |
| 26                              | 5.01 | Is the taxon likely to consume threatened or protected native taxa in the RA area?                                                                                           | Yes      | Yes. could be possible                                                                                                                                                                                                                             | Very high |
| 27                              | 5.02 | Is the taxon likely to sequester food resources (including nutrients) to the detriment of native taxa in the RA area?                                                        | No       | Not known                                                                                                                                                                                                                                          | Medium    |
| <b>6. Reproduction</b>          |      |                                                                                                                                                                              |          |                                                                                                                                                                                                                                                    |           |
| 28                              | 6.01 | Is the taxon likely to exhibit parental care and/or to reduce age-at-maturity in response to environmental conditions?                                                       | No       | Does not exhibit parental care See: <a href="https://fishbase.mnhn.fr/summary/Perca-fluviatilis.html">https://fishbase.mnhn.fr/summary/Perca-fluviatilis.html</a>                                                                                  | Medium    |
| 29                              | 6.02 | Is the taxon likely to produce viable gametes or propagules (in the RA area)?                                                                                                | Yes      | Yes, Climate is quite similar.                                                                                                                                                                                                                     | Very high |
| 30                              | 6.03 | Is the taxon likely to hybridise naturally with native taxa?                                                                                                                 | No       | NO                                                                                                                                                                                                                                                 | Very high |
| 31                              | 6.04 | Is the taxon likely to be hermaphroditic or to display asexual reproduction?                                                                                                 | No       | No. Does not display asexual reproduction                                                                                                                                                                                                          | Very high |
| 32                              | 6.05 | Is the taxon dependent on the presence of another taxon (or specific habitat features) to complete its life cycle?                                                           | No       | No. See: <a href="https://fishbase.mnhn.fr/summary/Perca-fluviatilis.html">https://fishbase.mnhn.fr/summary/Perca-fluviatilis.html</a>                                                                                                             | Very high |
| 33                              | 6.06 | Is the taxon known (or likely) to produce a large number of propagules or offspring within a short time span (e.g. < 1 year)?                                                | Yes      | Yes See: <a href="https://fishbase.mnhn.fr/summary/Perca-fluviatilis.html">https://fishbase.mnhn.fr/summary/Perca-fluviatilis.html</a>                                                                                                             | High      |
| 34                              | 6.07 | How many time units (days, months, years) does the taxon require to reach the age-at-first-reproduction?                                                                     | 1        | males at 1-2; Females at 2-4.                                                                                                                                                                                                                      | Medium    |
| <b>7. Dispersal mechanisms</b>  |      |                                                                                                                                                                              |          |                                                                                                                                                                                                                                                    |           |
| 35                              | 7.01 | How many potential internal vectors/pathways could the taxon use to disperse within the RA area (with suitable)                                                              | >1       | Aquaculture; Recreational fisheries                                                                                                                                                                                                                | High      |
| 36                              | 7.02 | Will any of these vectors/pathways bring the taxon in close proximity to one or more protected areas (e.g. MCZ, MPA, SSSI)?                                                  | Yes      | Yesm it is possible                                                                                                                                                                                                                                | Very high |
| 37                              | 7.03 | Does the taxon have a means of actively attaching itself to hard substrata (e.g. ship hulls, pilings, buoys) such that it enhances the likelihood of dispersal?              | No       | No. Morphologically this species does not have a means of actively attaching itself to hard substrata                                                                                                                                              | Very high |
| 38                              | 7.04 | Is natural dispersal of the taxon likely to occur as eggs (for animals) or as propagules (for plants: seeds, spores) in the RA area?                                         | No       | No. can not be distributed as eggs.                                                                                                                                                                                                                | High      |
| 39                              | 7.05 | Is natural dispersal of the taxon likely to occur as larvae/juveniles (for animals) or as fragments/seedlings (for plants) in the RA area?                                   | Yes      | No. can not be distributed as eggs.                                                                                                                                                                                                                | High      |
| 40                              | 7.06 | Are older life stages of the taxon likely to migrate in the RA area for reproduction?                                                                                        | Yes      | Does not migrate for reproduction                                                                                                                                                                                                                  | Very high |
| 41                              | 7.07 | Are propagules or eggs of the taxon likely to be dispersed in the RA area by other animals?                                                                                  | No       | No. Can not be dispersed by other animals                                                                                                                                                                                                          | Very high |
| 42                              | 7.08 | Is dispersal of the taxon along any of the vectors/pathways mentioned in the previous seven questions (35-41; i.e. both unintentional or intentional) likely to be           | Yes      | No. Can not be dispersed by other animals                                                                                                                                                                                                          | Very high |
| 43                              | 7.09 | Is dispersal of the taxon density dependent?                                                                                                                                 | No       | No data                                                                                                                                                                                                                                            | High      |
| <b>8. Tolerance attributes</b>  |      |                                                                                                                                                                              |          |                                                                                                                                                                                                                                                    |           |
| 44                              | 8.01 | Is the taxon able to withstand being out of water for extended periods (e.g. minimum of one or more hours) at some stage of its life cycle?                                  | No       | No data                                                                                                                                                                                                                                            | High      |
| 45                              | 8.02 | Is the taxon tolerant of a wide range of water quality conditions relevant to that taxon? [In the Justification field, indicate the relevant water quality variable(s) being | Yes      | Temperatures; salinities                                                                                                                                                                                                                           | High      |
| 46                              | 8.03 | Can the taxon be controlled or eradicated in the wild with chemical, biological, or other agents/means?                                                                      | Yes      | Yes it is possible                                                                                                                                                                                                                                 | Low       |
| 47                              | 8.04 | Is the taxon likely to tolerate or benefit from environmental/human disturbance?                                                                                             | No       | No data                                                                                                                                                                                                                                            | High      |
| 48                              | 8.05 | Is the taxon able to tolerate salinity levels that are higher or lower than those found in its usual environment?                                                            | Yes      | Yes                                                                                                                                                                                                                                                | High      |
| 49                              | 8.06 | Are there effective natural enemies (predators) of the taxon present in the RA                                                                                               | No       | No effective natural enemies present in RA area                                                                                                                                                                                                    | Very high |
| <b>C. Climate change</b>        |      |                                                                                                                                                                              |          |                                                                                                                                                                                                                                                    |           |
| <b>9. Climate change</b>        |      |                                                                                                                                                                              |          |                                                                                                                                                                                                                                                    |           |
| 50                              | 9.01 | Under the predicted future climatic conditions, are the risks of entry into the RA area posed by the taxon likely to increase, decrease or not change?                       | Increase | It was hypotheses that climate change might alert the mechanisms of transportation and introduction of non-native species. Commercial and recreational activities will increase, that itself increases the propaague pressure levels of non-native | Very high |

|    |      |                                                                                                                                                              |           |           |        |
|----|------|--------------------------------------------------------------------------------------------------------------------------------------------------------------|-----------|-----------|--------|
| 51 | 9.02 | Under the predicted future climatic conditions, are the risks of establishment posed by the taxon likely to increase, decrease or not change?                | Increase  | Increase  | High   |
| 52 | 9.03 | Under the predicted future climatic conditions, are the risks of dispersal within the RA area posed by the taxon likely to increase, decrease or not change? | Increase  | Increase  | High   |
| 53 | 9.04 | Under the predicted future climatic conditions, what is the likely magnitude of future potential impacts on biodiversity and/or ecological integrity/status? | Higher    | Higher    | Medium |
| 54 | 9.05 | Under the predicted future climatic conditions, what is the likely magnitude of future potential impacts on ecosystem structure and/or function?             | Higher    | Higher    | Medium |
| 55 | 9.06 | Under the predicted future climatic conditions, what is the likely magnitude of future potential impacts on ecosystem services/socio-economic factors?       | No change | no change | Low    |

| Statistics                                     |             |
|------------------------------------------------|-------------|
| Scores                                         |             |
| <b>BRA</b>                                     | <b>28.0</b> |
| <b>BRA Outcome</b>                             | <b>-</b>    |
| <b>BRA+CCA</b>                                 | <b>38.0</b> |
| <b>BRA+CCA Outcome</b>                         | <b>-</b>    |
| Score partition                                |             |
| <b>A. Biogeography/Historical</b>              | <b>12.0</b> |
| 1. Domestication/Cultivation                   | 4.0         |
| 2. Climate, distribution and introduction risk | 2.0         |
| 3. Invasive elsewhere                          | 6.0         |
| <b>B. Biology/Ecology</b>                      | <b>16.0</b> |
| 4. Undesirable (or persistence) traits         | 6.0         |
| 5. Resource exploitation                       | 5.0         |
| 6. Reproduction                                | 2.0         |
| 7. Dispersal mechanisms                        | 2.0         |
| 8. Tolerance attributes                        | 1.0         |
| <b>C. Climate change</b>                       | <b>10.0</b> |
| 9. Climate change                              | 10.0        |
| Answered Questions                             |             |
| <b>Total</b>                                   | <b>55</b>   |
| <b>A. Biogeography/Historical</b>              | <b>13</b>   |
| 1. Domestication/Cultivation                   | 3           |
| 2. Climate, distribution and introduction risk | 5           |
| 3. Invasive elsewhere                          | 5           |
| <b>B. Biology/Ecology</b>                      | <b>36</b>   |
| 4. Undesirable (or persistence) traits         | 12          |
| 5. Resource exploitation                       | 2           |
| 6. Reproduction                                | 7           |
| 7. Dispersal mechanisms                        | 9           |
| 8. Tolerance attributes                        | 6           |
| <b>C. Climate change</b>                       | <b>6</b>    |
| 9. Climate change                              | 6           |
| Sectors affected                               |             |
| <b>Commercial</b>                              | <b>7</b>    |
| <b>Environmental</b>                           | <b>14</b>   |
| <b>Species or population nuisance traits</b>   | <b>22</b>   |

| Thresholds     |             |
|----------------|-------------|
| <b>BRA</b>     | <b>-</b>    |
| <b>BRA+CCA</b> | <b>-</b>    |
| Confidence     |             |
| <b>BRA+CCA</b> | <b>0.73</b> |
| <b>BRA</b>     | <b>0.74</b> |
| <b>CCA</b>     | <b>0.63</b> |

| Date and Time       |  |
|---------------------|--|
| 21/05/2022 15:27:42 |  |

## AS-ISK v2

| Taxon and Assessor details         |                                                                                                                                 |
|------------------------------------|---------------------------------------------------------------------------------------------------------------------------------|
| Category                           | Fishes and Lampreys (freshwater)                                                                                                |
| Taxon name                         | <i>Pseudorasbora parva</i>                                                                                                      |
| Common name                        | topmouth gudgeon                                                                                                                |
| Assessor                           | Bella Japoshvili                                                                                                                |
| Risk screening context             |                                                                                                                                 |
| Reason and socio-economic benefits | This species is already widespread in the whole South Caucasus and is considered one of the most                                |
| Risk assessment area               | South Caucasus                                                                                                                  |
| Taxonomy                           | Actinopteri (ray-finned fishes) > Cypriniformes (Carps) > Gobionidae (Gudgeons)                                                 |
| Native range                       | Asia                                                                                                                            |
| Introduced range                   | Eurasia                                                                                                                         |
| URL                                | <a href="https://www.fishbase.de/summary/Pseudorasbora-parva.html">https://www.fishbase.de/summary/Pseudorasbora-parva.html</a> |

|                                                |      | Response                                                                                                                                                                | Justification (references and/or other information) | Confidence                                                                                                                                                                                                                                                                                         |           |
|------------------------------------------------|------|-------------------------------------------------------------------------------------------------------------------------------------------------------------------------|-----------------------------------------------------|----------------------------------------------------------------------------------------------------------------------------------------------------------------------------------------------------------------------------------------------------------------------------------------------------|-----------|
| A. Biogeography/Historical                     |      |                                                                                                                                                                         |                                                     |                                                                                                                                                                                                                                                                                                    |           |
| 1. Domestication/Cultivation                   |      |                                                                                                                                                                         |                                                     |                                                                                                                                                                                                                                                                                                    |           |
| 1                                              | 1.01 | Has the taxon been the subject of domestication (or cultivation) for at least 20 generations?                                                                           | No                                                  | Not a species with any aquacultural, recreational or other importance                                                                                                                                                                                                                              | Very high |
| 2                                              | 1.02 | Is the taxon harvested in the wild and likely to be sold or used in its live form?                                                                                      | No                                                  | No such fact has ever been reported                                                                                                                                                                                                                                                                | Very high |
| 3                                              | 1.03 | Does the taxon have invasive races, varieties, sub-taxa or congeners?                                                                                                   | No                                                  | No such taxa is known                                                                                                                                                                                                                                                                              | Very high |
| 2. Climate, distribution and introduction risk |      |                                                                                                                                                                         |                                                     |                                                                                                                                                                                                                                                                                                    |           |
| 4                                              | 2.01 | How similar are the climatic conditions of the Risk Assessment (RA) area and the taxon's native range?                                                                  | Low                                                 | Result of climatch algorithm                                                                                                                                                                                                                                                                       | Medium    |
| 5                                              | 2.02 | What is the quality of the climate matching data?                                                                                                                       | Low                                                 | Due to low resolution of RA climate data                                                                                                                                                                                                                                                           | High      |
| 6                                              | 2.03 | Is the taxon already present outside of captivity in the RA area?                                                                                                       | Yes                                                 | Kuljanishvili, T., Mumladze, L., Japoshvili, B., Mustafayev, N., Ibrahimov, S., Patoka, J., ... & Kalous, L. (2021). The first unified inventory of non-native fishes of the South Caucasian countries, Armenia, Azerbaijan, and Georgia. Knowledge & Management of Aquatic Ecosystems, (422), 32. | Very high |
| 7                                              | 2.04 | How many potential vectors could the taxon use to enter in the RA area?                                                                                                 | > 1                                                 | Human mediated and natural dispersal                                                                                                                                                                                                                                                               | Very high |
| 8                                              | 2.05 | Is the taxon currently found in close proximity to, and likely to enter into, the RA area in the near future (e.g. unintentional and intentional introductions)?        | Yes                                                 | Kuljanishvili, T., Mumladze, L., Japoshvili, B., Mustafayev, N., Ibrahimov, S., Patoka, J., ... & Kalous, L. (2021). The first unified inventory of non-native fishes of the South Caucasian countries, Armenia, Azerbaijan, and Georgia. Knowledge & Management of Aquatic Ecosystems, (422), 32. | Very high |
| 3. Invasive elsewhere                          |      |                                                                                                                                                                         |                                                     |                                                                                                                                                                                                                                                                                                    |           |
| 9                                              | 3.01 | Has the taxon become naturalised (established viable populations) outside its native range?                                                                             | Yes                                                 | Kuljanishvili, T., Mumladze, L., Japoshvili, B., Mustafayev, N., Ibrahimov, S., Patoka, J., ... & Kalous, L. (2021). The first unified inventory of non-native fishes of the South Caucasian countries, Armenia, Azerbaijan, and Georgia. Knowledge & Management of Aquatic Ecosystems, (422), 32. | Very high |
| 10                                             | 3.02 | In the taxon's introduced range, are there known adverse impacts to wild stocks or commercial taxa?                                                                     | Yes                                                 | e.g. Gozlan, R. E., St-Hilaire, S., Feist, S. W., Martin, P., & Kent, M. L. (2005). Disease threat to European fish. Nature, 435(7045), 1046-1046.                                                                                                                                                 | High      |
| 11                                             | 3.03 | In the taxon's introduced range, are there known adverse impacts to aquaculture?                                                                                        | Yes                                                 | e.g. Gozlan, R. E., St-Hilaire, S., Feist, S. W., Martin, P., & Kent, M. L. (2005). Disease threat to European fish. Nature, 435(7045), 1046-1046.                                                                                                                                                 | High      |
| 12                                             | 3.04 | In the taxon's introduced range, are there known adverse impacts to ecosystem                                                                                           | Yes                                                 | Have a strong effect on ecosystems however not well evaluated the impact on services                                                                                                                                                                                                               | Low       |
| 13                                             | 3.05 | In the taxon's introduced range, are there known adverse socio-economic impacts?                                                                                        | Yes                                                 | Gozlan, R. E., Andreou, D., Asaeda, T., Beyer, K., Bouhadad, R., Burnard, D., ... & Robert Britton, J. (2010). Pan-continental invasion of Pseudorasbora parva: towards a better understanding of freshwater fish invasions. Fish and Fisheries, 11(4), 315-340.                                   | High      |
| B. Biology/Ecology                             |      |                                                                                                                                                                         |                                                     |                                                                                                                                                                                                                                                                                                    |           |
| 4. Undesirable (or persistence) traits         |      |                                                                                                                                                                         |                                                     |                                                                                                                                                                                                                                                                                                    |           |
| 14                                             | 4.01 | Is it likely that the taxon will be poisonous or pose other risks to human health?                                                                                      | No                                                  | Species is harmless                                                                                                                                                                                                                                                                                | Very high |
| 15                                             | 4.02 | Is it likely that the taxon will smother one or more native taxa (that are not threatened or protected)?                                                                | Yes                                                 | Gozlan, R. E., Andreou, D., Asaeda, T., Beyer, K., Bouhadad, R., Burnard, D., ... & Robert Britton, J. (2010). Pan-continental invasion of Pseudorasbora parva: towards a better understanding of freshwater fish invasions. Fish and Fisheries, 11(4), 315-340.                                   | Very high |
| 16                                             | 4.03 | Are there any threatened or protected taxa that the non-native taxon would parasitise in the RA area?                                                                   | Yes                                                 | Can parasite on any fish eggs                                                                                                                                                                                                                                                                      | High      |
| 17                                             | 4.04 | Is the taxon adaptable in terms of climatic and other environmental conditions, thus enhancing its potential persistence if it has invaded or could invade the RA area? | Yes                                                 | Although not well documented, its widespread invasion indicates the ability of the species to adopt the variable environment.                                                                                                                                                                      | Medium    |
| 18                                             | 4.05 | Is the taxon likely to disrupt food-web structure/function in aquatic ecosystems if it has invaded or is likely to invade the RA area?                                  | Yes                                                 | Britton, J. R., Davies, G. D., & Harrod, C. (2010). Trophic interactions and consequent impacts of the invasive fish Pseudorasbora parva in a native aquatic foodweb: a field investigation in the UK. Biological Invasions, 12(6), 1533-1542.                                                     | High      |
| 19                                             | 4.06 | Is the taxon likely to exert adverse impacts on ecosystem services in the RA area?                                                                                      | Yes                                                 | Gozlan, R. E., Andreou, D., Asaeda, T., Beyer, K., Bouhadad, R., Burnard, D., ... & Robert Britton, J. (2010). Pan-continental invasion of Pseudorasbora parva: towards a better understanding of freshwater fish invasions. Fish and Fisheries, 11(4), 315-340.                                   | High      |

|                                 |      |                                                                                                                                                                 |     |                                                                                                                                                                                                                                                                                                                |           |
|---------------------------------|------|-----------------------------------------------------------------------------------------------------------------------------------------------------------------|-----|----------------------------------------------------------------------------------------------------------------------------------------------------------------------------------------------------------------------------------------------------------------------------------------------------------------|-----------|
| 20                              | 4.07 | Is it likely that the taxon will host, and/or act as a vector for, recognised pests and infectious agents that are endemic in the RA                            | No  | No such an expectation exists                                                                                                                                                                                                                                                                                  | Low       |
| 21                              | 4.08 | Is it likely that the taxon will host, and/or act as a vector for, recognised pests and infectious agents that are absent from (novel to) the RA area?          | Yes | Gozlan, R. E., Andreou, D., Asaeda, T., Beyer, K., Bouhadad, R., Burnard, D., ... & Robert Britton, J. (2010). Pan-continental invasion of <i>Pseudorasbora parva</i> : towards a better understanding of freshwater fish invasions. <i>Fish and Fisheries</i> , 11(4), 315-340.                               | High      |
| 22                              | 4.09 | Is it likely that the taxon will achieve a body size that will make it more likely to be released from captivity?                                               | No  | This is small bodied species not exceeds 15 cm in length                                                                                                                                                                                                                                                       | Very high |
| 23                              | 4.10 | Is the taxon capable of sustaining itself in a range of water velocity conditions (e.g. versatile in habitat use)?                                              | Yes | Occurs in all kind of stagnant and flowing waterbodies                                                                                                                                                                                                                                                         | Very high |
| 24                              | 4.11 | Is it likely that the taxon's mode of existence (e.g. excretion of by-products) or behaviours (e.g. feeding) will reduce habitat quality for native taxa?       | Yes | Gozlan, R. E., Andreou, D., Asaeda, T., Beyer, K., Bouhadad, R., Burnard, D., ... & Robert Britton, J. (2010). Pan-continental invasion of <i>Pseudorasbora parva</i> : towards a better understanding of freshwater fish invasions. <i>Fish and Fisheries</i> , 11(4), 315-340.                               | High      |
| 25                              | 4.12 | Is the taxon likely to maintain a viable population even when present in low densities (or persisting in adverse conditions by way of a dormant form)?          | Yes | No documented evidence exists                                                                                                                                                                                                                                                                                  | Low       |
| <b>5. Resource exploitation</b> |      |                                                                                                                                                                 |     |                                                                                                                                                                                                                                                                                                                |           |
| 26                              | 5.01 | Is the taxon likely to consume threatened or protected native taxa in the RA area?                                                                              | Yes | Gozlan, R. E., Andreou, D., Asaeda, T., Beyer, K., Bouhadad, R., Burnard, D., ... & Robert Britton, J. (2010). Pan-continental invasion of <i>Pseudorasbora parva</i> : towards a better understanding of freshwater fish invasions. <i>Fish and Fisheries</i> , 11(4), 315-340.                               | High      |
| 27                              | 5.02 | Is the taxon likely to sequester food resources (including nutrients) to the detriment of native taxa in the RA area?                                           | Yes | Gozlan, R. E., Andreou, D., Asaeda, T., Beyer, K., Bouhadad, R., Burnard, D., ... & Robert Britton, J. (2010). Pan-continental invasion of <i>Pseudorasbora parva</i> : towards a better understanding of freshwater fish invasions. <i>Fish and Fisheries</i> , 11(4), 315-340.                               | Very high |
| <b>6. Reproduction</b>          |      |                                                                                                                                                                 |     |                                                                                                                                                                                                                                                                                                                |           |
| 28                              | 6.01 | Is the taxon likely to exhibit parental care and/or to reduce age-at-maturity in response to environmental conditions?                                          | Yes | Gozlan, R. E., Andreou, D., Asaeda, T., Beyer, K., Bouhadad, R., Burnard, D., ... & Robert Britton, J. (2010). Pan-continental invasion of <i>Pseudorasbora parva</i> : towards a better understanding of freshwater fish invasions. <i>Fish and Fisheries</i> , 11(4), 315-340.                               | Very high |
| 29                              | 6.02 | Is the taxon likely to produce viable gametes or propagules (in the RA area)?                                                                                   | Yes | Kuljanishvili, T., Mumladze, L., Japoshvili, B., Mustafayev, N., Ibrahimov, S., Patoka, J., ... & Kalous, L. (2021). The first unified inventory of non-native fishes of the South Caucasian countries, Armenia, Azerbaijan, and Georgia. <i>Knowledge &amp; Management of Aquatic Ecosystems</i> , (422), 32. | Very high |
| 30                              | 6.03 | Is the taxon likely to hybridise naturally with native taxa?                                                                                                    | Yes | Gozlan, R. E., Andreou, D., Asaeda, T., Beyer, K., Bouhadad, R., Burnard, D., ... & Robert Britton, J. (2010). Pan-continental invasion of <i>Pseudorasbora parva</i> : towards a better understanding of freshwater fish invasions. <i>Fish and Fisheries</i> , 11(4), 315-340.                               | Very high |
| 31                              | 6.04 | Is the taxon likely to be hermaphroditic or to display asexual reproduction?                                                                                    | No  | The species is reproducing sexually                                                                                                                                                                                                                                                                            | High      |
| 32                              | 6.05 | Is the taxon dependent on the presence of another taxon (or specific habitat features) to complete its life cycle?                                              | No  | No such dependancy have ever been observed                                                                                                                                                                                                                                                                     | Very high |
| 33                              | 6.06 | Is the taxon known (or likely) to produce a large number of propagules or offspring within a short time span (e.g. < 1 year)?                                   | Yes | Gozlan, R. E., Andreou, D., Asaeda, T., Beyer, K., Bouhadad, R., Burnard, D., ... & Robert Britton, J. (2010). Pan-continental invasion of <i>Pseudorasbora parva</i> : towards a better understanding of freshwater fish invasions. <i>Fish and Fisheries</i> , 11(4), 315-340.                               | Very high |
| 34                              | 6.07 | How many time units (days, months, years) does the taxon require to reach the age-at-first-reproduction?                                                        | 9   | Month                                                                                                                                                                                                                                                                                                          | Very high |
| <b>7. Dispersal mechanisms</b>  |      |                                                                                                                                                                 |     |                                                                                                                                                                                                                                                                                                                |           |
| 35                              | 7.01 | How many potential internal vectors/pathways could the taxon use to disperse within the RA area (with suitable habitats nearby)?                                | >1  | Gozlan, R. E., Andreou, D., Asaeda, T., Beyer, K., Bouhadad, R., Burnard, D., ... & Robert Britton, J. (2010). Pan-continental invasion of <i>Pseudorasbora parva</i> : towards a better understanding of freshwater fish invasions. <i>Fish and Fisheries</i> , 11(4), 315-340.                               | Very high |
| 36                              | 7.02 | Will any of these vectors/pathways bring the taxon in close proximity to one or more protected areas (e.g. MCZ, MPA, SSSI)?                                     | Yes | Kuljanishvili, T., Mumladze, L., Japoshvili, B., Mustafayev, N., Ibrahimov, S., Patoka, J., ... & Kalous, L. (2021). The first unified inventory of non-native fishes of the South Caucasian countries, Armenia, Azerbaijan, and Georgia. <i>Knowledge &amp; Management of Aquatic Ecosystems</i> , (422), 32. | Very high |
| 37                              | 7.03 | Does the taxon have a means of actively attaching itself to hard substrata (e.g. ship hulls, pilings, buoys) such that it enhances the likelihood of dispersal? | No  | No such an evidence exists                                                                                                                                                                                                                                                                                     | Very high |
| 38                              | 7.04 | Is natural dispersal of the taxon likely to occur as eggs (for animals) or as propagules (for plants: seeds, spores) in the RA area?                            | No  | No documented evidence exists                                                                                                                                                                                                                                                                                  | Low       |
| 39                              | 7.05 | Is natural dispersal of the taxon likely to occur as larvae/juveniles (for animals) or as fragments/seedlings (for plants) in the RA area?                      | Yes | Gozlan, R. E., Andreou, D., Asaeda, T., Beyer, K., Bouhadad, R., Burnard, D., ... & Robert Britton, J. (2010). Pan-continental invasion of <i>Pseudorasbora parva</i> : towards a better understanding of freshwater fish invasions. <i>Fish and Fisheries</i> , 11(4), 315-340.                               | Very high |
| 40                              | 7.06 | Are older life stages of the taxon likely to migrate in the RA area for reproduction?                                                                           | Yes | Gozlan, R. E., Andreou, D., Asaeda, T., Beyer, K., Bouhadad, R., Burnard, D., ... & Robert Britton, J. (2010). Pan-continental invasion of <i>Pseudorasbora parva</i> : towards a better understanding of freshwater fish invasions. <i>Fish and Fisheries</i> , 11(4), 315-340.                               | Very high |
| 41                              | 7.07 | Are propagules or eggs of the taxon likely to be dispersed in the RA area by other animals?                                                                     | No  | No such an evidence exists                                                                                                                                                                                                                                                                                     | Medium    |



|                                |      |                                                                                                                                                                              |           |                                                                                                                                                                                                                                                                                  |           |
|--------------------------------|------|------------------------------------------------------------------------------------------------------------------------------------------------------------------------------|-----------|----------------------------------------------------------------------------------------------------------------------------------------------------------------------------------------------------------------------------------------------------------------------------------|-----------|
| 42                             | 7.08 | Is dispersal of the taxon along any of the vectors/pathways mentioned in the previous seven questions (35–41; i.e. both unintentional or intentional) likely to be           | Yes       | Gozian, R. E., Andreou, D., Asaeda, T., Beyer, K., Bouhadad, R., Burnard, D., ... & Robert Britton, J. (2010). Pan-continental invasion of <i>Pseudorasbora parva</i> : towards a better understanding of freshwater fish invasions. <i>Fish and Fisheries</i> , 11(4), 315-340. | Very high |
| 43                             | 7.09 | Is dispersal of the taxon density dependent?                                                                                                                                 | No        | No such an evidence exists                                                                                                                                                                                                                                                       | Medium    |
| <b>8. Tolerance attributes</b> |      |                                                                                                                                                                              |           |                                                                                                                                                                                                                                                                                  |           |
| 44                             | 8.01 | Is the taxon able to withstand being out of water for extended periods (e.g. minimum of one or more hours) at some stage of its life cycle?                                  | No        | Own unpublished data                                                                                                                                                                                                                                                             | High      |
| 45                             | 8.02 | Is the taxon tolerant of a wide range of water quality conditions relevant to that taxon? [In the Justification field, indicate the relevant water quality variable(s) being | Yes       | Oxygen, turbidity, wastewaters, temperature etc.                                                                                                                                                                                                                                 | Very high |
| 46                             | 8.03 | Can the taxon be controlled or eradicated in the wild with chemical, biological, or other agents/means?                                                                      | Yes       | Britton, J. R., Davies, G. D., & Brazier, M. (2010). Towards the successful control of the invasive <i>Pseudorasbora parva</i> in the UK. <i>Biological Invasions</i> , 12(1), 125-131.                                                                                          | High      |
| 47                             | 8.04 | Is the taxon likely to tolerate or benefit from environmental/human disturbance?                                                                                             | Yes       | No documented evidence exists, based on professional judgement                                                                                                                                                                                                                   | Medium    |
| 48                             | 8.05 | Is the taxon able to tolerate salinity levels that are higher or lower than those found in its usual environment?                                                            | No        | Own unpublished data. It usually can not tolerate marine or even brackish waters.                                                                                                                                                                                                | Medium    |
| 49                             | 8.06 | Are there effective natural enemies (predators) of the taxon present in the RA                                                                                               | No        | Based on professional judgement                                                                                                                                                                                                                                                  | High      |
| <b>C. Climate change</b>       |      |                                                                                                                                                                              |           |                                                                                                                                                                                                                                                                                  |           |
| <b>9. Climate change</b>       |      |                                                                                                                                                                              |           |                                                                                                                                                                                                                                                                                  |           |
| 50                             | 9.01 | Under the predicted future climatic conditions, are the risks of entry into the RA area posed by the taxon likely to increase, decrease or not change?                       | No change | Its already in all drainages of RA ara                                                                                                                                                                                                                                           | Very high |
| 51                             | 9.02 | Under the predicted future climatic conditions, are the risks of establishment posed by the taxon likely to increase, decrease or not change?                                | No change | Established populations everywhere in RA area                                                                                                                                                                                                                                    | Very high |
| 52                             | 9.03 | Under the predicted future climatic conditions, are the risks of dispersal within the RA area posed by the taxon likely to increase, decrease or not change?                 | No change | Based on professional judgement                                                                                                                                                                                                                                                  | Very high |
| 53                             | 9.04 | Under the predicted future climatic conditions, what is the likely magnitude of future potential impacts on biodiversity and/or ecological integrity/status?                 | Higher    | Due to adding effect of different threats, based on professional judgement                                                                                                                                                                                                       | Medium    |
| 54                             | 9.05 | Under the predicted future climatic conditions, what is the likely magnitude of future potential impacts on ecosystem structure and/or function?                             | Higher    | Based on professional judgement                                                                                                                                                                                                                                                  | Medium    |
| 55                             | 9.06 | Under the predicted future climatic conditions, what is the likely magnitude of future potential impacts on ecosystem services/socio-economic factors?                       | Higher    | Based on professional judgement                                                                                                                                                                                                                                                  | Medium    |

| Statistics                                     |             |
|------------------------------------------------|-------------|
| Scores                                         |             |
| <b>BRA</b>                                     | <b>41.0</b> |
| <b>BRA Outcome</b>                             | <b>-</b>    |
| <b>BRA+CCA</b>                                 | <b>47.0</b> |
| <b>BRA+CCA Outcome</b>                         | <b>-</b>    |
| Score partition                                |             |
| <b>A. Biogeography/Historical</b>              | <b>18.0</b> |
| 1. Domestication/Cultivation                   | -2.0        |
| 2. Climate, distribution and introduction risk | 2.0         |
| 3. Invasive elsewhere                          | 18.0        |
| <b>B. Biology/Ecology</b>                      | <b>23.0</b> |
| 4. Undesirable (or persistence) traits         | 9.0         |
| 5. Resource exploitation                       | 7.0         |
| 6. Reproduction                                | 3.0         |
| 7. Dispersal mechanisms                        | 2.0         |
| 8. Tolerance attributes                        | 2.0         |
| <b>C. Climate change</b>                       | <b>6.0</b>  |
| 9. Climate change                              | 6.0         |
| Answered Questions                             |             |
| <b>Total</b>                                   | <b>55</b>   |
| <b>A. Biogeography/Historical</b>              | <b>13</b>   |
| 1. Domestication/Cultivation                   | 3           |
| 2. Climate, distribution and introduction risk | 5           |
| 3. Invasive elsewhere                          | 5           |
| <b>B. Biology/Ecology</b>                      | <b>36</b>   |
| 4. Undesirable (or persistence) traits         | 12          |
| 5. Resource exploitation                       | 2           |
| 6. Reproduction                                | 7           |
| 7. Dispersal mechanisms                        | 9           |
| 8. Tolerance attributes                        | 6           |
| <b>C. Climate change</b>                       | <b>6</b>    |
| 9. Climate change                              | 6           |
| Sectors affected                               |             |

|                                              |           |
|----------------------------------------------|-----------|
| <b>Commercial</b>                            | <b>17</b> |
| <b>Environmental</b>                         | <b>17</b> |
| <b>Species or population nuisance traits</b> | <b>18</b> |

|                   |             |
|-------------------|-------------|
| <b>Thresholds</b> |             |
| <b>BRA</b>        | <b>-</b>    |
| <b>BRA+CCA</b>    | <b>-</b>    |
| <b>Confidence</b> |             |
| <b>BRA+CCA</b>    | <b>0.80</b> |
| <b>BRA</b>        | <b>0.81</b> |
| <b>CCA</b>        | <b>0.75</b> |

|                            |  |
|----------------------------|--|
| <b>Date and Time</b>       |  |
| <b>16/05/2022 21:38:48</b> |  |

## AS-ISK v2

| Taxon and Assessor details         |                                                                                                          |
|------------------------------------|----------------------------------------------------------------------------------------------------------|
| Category                           | Fishes and Lampreys (freshwater)                                                                         |
| Taxon name                         | <i>Pseudorasbora parva</i>                                                                               |
| Common name                        | topmouth gudgeon                                                                                         |
| Assessor                           | Giorgi Epitashvili                                                                                       |
| Risk screening context             |                                                                                                          |
| Reason and socio-economic benefits | Native range of <i>Pseudorasbora parva</i> is Asia: Amur to Zhujiang [Pearl River] drainages in Siberia, |
| Risk assessment area               | South Caucasus                                                                                           |
| Taxonomy                           | <i>Pseudorasbora parva</i> (Temminck & Schlegel 1846)                                                    |
| Native range                       | Asia: Amur to Zhujiang [Pearl River] drainages in Siberia, Korea and China                               |
| Introduced range                   | Introduced to various areas in Europe and Asia                                                           |
| URL                                | <a href="https://www.fishbase.se/summary/4691">https://www.fishbase.se/summary/4691</a>                  |

|                                                |      |                                                                                                                                                                         | Response | Justification (references and/or other information)                                                                                                                                                                       | Confidence |
|------------------------------------------------|------|-------------------------------------------------------------------------------------------------------------------------------------------------------------------------|----------|---------------------------------------------------------------------------------------------------------------------------------------------------------------------------------------------------------------------------|------------|
| A. Biogeography/Historical                     |      |                                                                                                                                                                         |          |                                                                                                                                                                                                                           |            |
| 1. Domestication/Cultivation                   |      |                                                                                                                                                                         |          |                                                                                                                                                                                                                           |            |
| 1                                              | 1.01 | Has the taxon been the subject of domestication (or cultivation) for at least 20 generations?                                                                           | No       | This fish is a weed, harms other species and is not used in aquaculture                                                                                                                                                   | High       |
| 2                                              | 1.02 | Is the taxon harvested in the wild and likely to be sold or used in its live form?                                                                                      | Yes      | This fish is caught randomly while fishing for other species. It has low quality meat and is less used for food.                                                                                                          | High       |
| 3                                              | 1.03 | Does the taxon have invasive races, varieties, sub-taxa or congeners?                                                                                                   | Yes      | <i>P. parva</i> is considered as one of the most invasive species in Europe (FAO 1988, Britton et al. 2009).                                                                                                              | Very high  |
| 2. Climate, distribution and introduction risk |      |                                                                                                                                                                         |          |                                                                                                                                                                                                                           |            |
| 4                                              | 2.01 | How similar are the climatic conditions of the Risk Assessment (RA) area and the taxon's native range?                                                                  | High     | In some areas of the Caucasus region, like the native range of this species, the climatic conditions are more or less similar (Climate Change in the South Caucasus (2012); Tishchenko et al. 2019).                      | High       |
| 5                                              | 2.02 | What is the quality of the climate matching data?                                                                                                                       | Medium   | Köppen-Geiger climate classification map                                                                                                                                                                                  | Medium     |
| 6                                              | 2.03 | Is the taxon already present outside of captivity in the RA area?                                                                                                       | Yes      | This fish is widely distributed in the SC region (own data, Ninua et al. 2013; Epitashvili et al. 2020; Kuljanishvili et al. 2020).                                                                                       | Very high  |
| 7                                              | 2.04 | How many potential vectors could the taxon use to enter in the RA area?                                                                                                 | >1       | This species is translocated within the region by anglers or other persons unintentional but probably animals also can transport the eggs of <i>P. parva</i> (Karabanov et al. 2013).                                     | High       |
| 8                                              | 2.05 | Is the taxon currently found in close proximity to, and likely to enter into, the RA area in the near future (e.g. unintentional and intentional introductions)?        | Yes      | This species is widely spread around the Caucasus region                                                                                                                                                                  | Very high  |
| 3. Invasive elsewhere                          |      |                                                                                                                                                                         |          |                                                                                                                                                                                                                           |            |
| 9                                              | 3.01 | Has the taxon become naturalised (established viable populations) outside its native range?                                                                             | Yes      | This species has viable populations around the Caucasus region (Ninua et al. 2013; Karabanov et al. 2013; Pipoyan and Arakelyan 2015; Kuljanishvili et al. 2020).                                                         | Very high  |
| 10                                             | 3.02 | In the taxon's introduced range, are there known adverse impacts to wild stocks or commercial taxa?                                                                     | Yes      | <i>P. parva</i> is considered to be a major threat to native fish communities and listed as an invasive alien species of European Union concern (Spikmans et al. 2020).                                                   | Very high  |
| 11                                             | 3.03 | In the taxon's introduced range, are there known adverse impacts to aquaculture?                                                                                        | Yes      | <i>P. parva</i> is known as the spreader of the parasite - <i>Sphaerothecum destruens</i> which became known for causing mortality in salmonid fishes in aquaculture (Spikmans et al. 2020).                              | Medium     |
| 12                                             | 3.04 | In the taxon's introduced range, are there known adverse impacts to ecosystem services?                                                                                 | Yes      | The study in Czech Republic described harmful competitive effect of huge populations of <i>P. parva</i> and its surprising economic consequences (Musil et al. 2015).                                                     | Very high  |
| 13                                             | 3.05 | In the taxon's introduced range, are there known adverse socio-economic impacts?                                                                                        | Yes      | The study in Czech Republic described harmful competitive effect of huge populations of <i>P. parva</i> and its surprising economic consequences (Musil et al. 2015).                                                     | Very high  |
| B. Biology/Ecology                             |      |                                                                                                                                                                         |          |                                                                                                                                                                                                                           |            |
| 4. Undesirable (or persistence) traits         |      |                                                                                                                                                                         |          |                                                                                                                                                                                                                           |            |
| 14                                             | 4.01 | Is it likely that the taxon will be poisonous or pose other risks to human health?                                                                                      | No       | Such a fact is not known                                                                                                                                                                                                  | Very high  |
| 15                                             | 4.02 | Is it likely that the taxon will smother one or more native taxa (that are not threatened or protected)?                                                                | Yes      | This species is invasive in the Caucasus region and reduces the spread and reproduction of local fish (Kuljanishvili et al. 2020).                                                                                        | Very high  |
| 16                                             | 4.03 | Are there any threatened or protected taxa that the non-native taxon would parasitise in the RA area?                                                                   | Yes      | <i>P. parva</i> as an invasive species eats eggs of local fish and prevents their reproduction.                                                                                                                           | Very high  |
| 17                                             | 4.04 | Is the taxon adaptable in terms of climatic and other environmental conditions, thus enhancing its potential persistence if it has invaded or could invade the RA area? | Yes      | This species has long been established in the SC region and accordingly, the local environmental conditions were acceptable to it.                                                                                        | Very high  |
| 18                                             | 4.05 | Is the taxon likely to disrupt food-web structure/function in aquatic ecosystems if it has invaded or is likely to invade the RA area?                                  | Yes      | No research has been conducted in this regard although a similar fact is likely to have occurred in many reservoirs of the SC region where local fish populations have been depleted by <i>P. parva</i>                   | Medium     |
| 19                                             | 4.06 | Is the taxon likely to exert adverse impacts on ecosystem services in the RA area?                                                                                      | Yes      | No research has been conducted in this regard however, a similar fact probably occurred in many reservoirs where local species were declining which in turn affects angling or other ecosystem services in the SC region. | Medium     |
| 20                                             | 4.07 | Is it likely that the taxon will host, and/or act as a vector for, recognised pests and infectious agents that are endemic in the RA area?                              | No       | No research has been conducted in this regard.                                                                                                                                                                            | Medium     |
| 21                                             | 4.08 | Is it likely that the taxon will host, and/or act as a vector for, recognised pests and infectious agents that are absent from (novel to) the RA area?                  | No       | No research has been conducted in this regard.                                                                                                                                                                            | Low        |

|                                 |      |                                                                                                                                                                              |                |                                                                                                                                                                           |           |
|---------------------------------|------|------------------------------------------------------------------------------------------------------------------------------------------------------------------------------|----------------|---------------------------------------------------------------------------------------------------------------------------------------------------------------------------|-----------|
| 22                              | 4.09 | Is it likely that the taxon will achieve a body size that will make it more likely to be released from captivity?                                                            | No             | Max length of this species is 12.5 cm TL (Verreycken et al. 2011)                                                                                                         | Very high |
| 23                              | 4.10 | Is the taxon capable of sustaining itself in a range of water velocity conditions (e.g. versatile in habitat use)?                                                           | Yes            | P. parva found in a wide variety of habitats, most abundantly in well vegetated small channels, ponds and small lakes (Kottelat and Freyhof, 2007).                       | High      |
| 24                              | 4.11 | Is it likely that the taxon's mode of existence (e.g. excretion of by-products) or behaviours (e.g. feeding) will reduce habitat quality for native taxa?                    | Yes            | No research has been conducted in this regard although it is expected that P. parva has a negative impact on habitat quality (Own judgement).                             | Very high |
| 25                              | 4.12 | Is the taxon likely to maintain a viable population even when present in low densities (or persisting in adverse conditions by way of a dormant form)?                       | Yes            | No research has been conducted in this regard.                                                                                                                            | Very high |
| <b>5. Resource exploitation</b> |      |                                                                                                                                                                              |                |                                                                                                                                                                           |           |
| 26                              | 5.01 | Is the taxon likely to consume threatened or protected native taxa in the RA area?                                                                                           | Yes            | No research has been conducted in this regard however, the probability of this is very high.                                                                              | Very high |
| 27                              | 5.02 | Is the taxon likely to sequester food resources (including nutrients) to the detriment of native taxa in the RA area?                                                        | Yes            | This fish is a competitor to local species.                                                                                                                               | High      |
| <b>6. Reproduction</b>          |      |                                                                                                                                                                              |                |                                                                                                                                                                           |           |
| 28                              | 6.01 | Is the taxon likely to exhibit parental care and/or to reduce age-at-maturity in response to environmental conditions?                                                       | Not applicable | No data                                                                                                                                                                   | Medium    |
| 29                              | 6.02 | Is the taxon likely to produce viable gametes or propagules (in the RA area)?                                                                                                | Yes            | This species is naturally reproduces in the SC region (Kuljanishvili et al. 2020).                                                                                        | High      |
| 30                              | 6.03 | Is the taxon likely to hybridise naturally with native taxa?                                                                                                                 | No             | Such a fact is not known.                                                                                                                                                 | High      |
| 31                              | 6.04 | Is the taxon likely to be hermaphroditic or to display asexual reproduction?                                                                                                 | No             | Such a fact is not known.                                                                                                                                                 | Medium    |
| 32                              | 6.05 | Is the taxon dependent on the presence of another taxon (or specific habitat features) to complete its life cycle?                                                           | No             | Such a fact is not known.                                                                                                                                                 | Medium    |
| 33                              | 6.06 | Is the taxon known (or likely) to produce a large number of propagules or offspring within a short time span (e.g. < 1 year)?                                                | Yes            | Females spawn 3-4 times in a season (Kottelat and Freyhof, 2007; Ninua et al. 2013).                                                                                      | Very high |
| 34                              | 6.07 | How many time units (days, months, years) does the taxon require to reach the age-at-first-reproduction?                                                                     | 2              | The species sexually mature at the age of 2 (Ninua et al. 2013).                                                                                                          | Very high |
| <b>7. Dispersal mechanisms</b>  |      |                                                                                                                                                                              |                |                                                                                                                                                                           |           |
| 35                              | 7.01 | How many potential internal vectors/pathways could the taxon use to disperse within the RA area (with suitable)                                                              | >1             | This species may disperse within the SC region by itself, other animals or by humans unintentionally.                                                                     | Very high |
| 36                              | 7.02 | Will any of these vectors/pathways bring the taxon in close proximity to one or more protected areas (e.g. MCZ, MPA, SSSI)?                                                  | Yes            | This species is distributed in the protected areas of the SC region (own data).                                                                                           | High      |
| 37                              | 7.03 | Does the taxon have a means of actively attaching itself to hard substrata (e.g. ship hulls, pilings, buoys) such that it enhances the likelihood of dispersal?              | No             | No such fact is known.                                                                                                                                                    | Medium    |
| 38                              | 7.04 | Is natural dispersal of the taxon likely to occur as eggs (for animals) or as propagules (for plants: seeds, spores) in the RA area?                                         | Yes            | No such fact is known however, P. parva can be spread by animals (e.g. birds).                                                                                            | Medium    |
| 39                              | 7.05 | Is natural dispersal of the taxon likely to occur as larvae/juveniles (for animals) or as fragments/seedlings (for plants) in the RA area?                                   | Yes            | This species is naturally reproduces in the region and accordingly, both juvenile and adult individuals are found here.                                                   | Medium    |
| 40                              | 7.06 | Are older life stages of the taxon likely to migrate in the RA area for reproduction?                                                                                        | Yes            | This species is actively spawns in the South Caucasus region                                                                                                              | High      |
| 41                              | 7.07 | Are propagules or eggs of the taxon likely to be dispersed in the RA area by other animals?                                                                                  | Yes            | No such fact is described however, P. parva can be spread by animals (e.g. birds) within the SC region.                                                                   | Medium    |
| 42                              | 7.08 | Is dispersal of the taxon along any of the vectors/pathways mentioned in the previous seven questions (35-41; i.e. both unintentional or intentional) likely to be           | Yes            | There is a possibility of that.                                                                                                                                           | High      |
| 43                              | 7.09 | Is dispersal of the taxon density dependent?                                                                                                                                 | Yes            | Populations of this species are growing rapidly in many countries which in turn leads to the expansion of its range.                                                      | High      |
| <b>8. Tolerance attributes</b>  |      |                                                                                                                                                                              |                |                                                                                                                                                                           |           |
| 44                              | 8.01 | Is the taxon able to withstand being out of water for extended periods (e.g. minimum of one or more hours) at some stage of its life cycle?                                  | No             | No such fact has been revealed                                                                                                                                            | High      |
| 45                              | 8.02 | Is the taxon tolerant of a wide range of water quality conditions relevant to that taxon? [In the Justification field, indicate the relevant water quality variable(s) being | Yes            | P. parva demonstrates great adaptability and tolerance of poor habitat quality (Gozlan et al. 2002; Beyer et al. 2007).                                                   | High      |
| 46                              | 8.03 | Can the taxon be controlled or eradicated in the wild with chemical, biological, or other agents/means?                                                                      | No             | This species is one of the most widespread invasive fish in the Europe, Caucasus and etc. There is no method by which this species could be removed from the environment. | High      |
| 47                              | 8.04 | Is the taxon likely to tolerate or benefit from environmental/human disturbance?                                                                                             | Yes            | This species has become widespread due to human activities.                                                                                                               | High      |
| 48                              | 8.05 | Is the taxon able to tolerate salinity levels that are higher or lower than those found in its usual environment?                                                            | No             | This fish is typical freshwater species and does not occur in the sea or estuaries                                                                                        | High      |

|                          |      |                                                                                                                                                              |           |                                                                                                                                                                                                                               |           |
|--------------------------|------|--------------------------------------------------------------------------------------------------------------------------------------------------------------|-----------|-------------------------------------------------------------------------------------------------------------------------------------------------------------------------------------------------------------------------------|-----------|
| 49                       | 8.06 | Are there effective natural enemies (predators) of the taxon present in the RA area?                                                                         | Yes       | There are several species in the Caucasus region which can eat P. parva: Silurus glanis, Esox lucius, Squalius spp, Sander lucioperca, etc. see checklist of the South Caucasian freshwater fish (Kulianishvili et al. 2020). | Very high |
| <b>C. Climate change</b> |      |                                                                                                                                                              |           |                                                                                                                                                                                                                               |           |
| <b>9. Climate change</b> |      |                                                                                                                                                              |           |                                                                                                                                                                                                                               |           |
| 50                       | 9.01 | Under the predicted future climatic conditions, are the risks of entry into the RA area posed by the taxon likely to increase, decrease or not change?       | Increase  | The area of this species is constantly growing in the Caucasus region.                                                                                                                                                        | Very high |
| 51                       | 9.02 | Under the predicted future climatic conditions, are the risks of establishment posed by the taxon likely to increase, decrease or not change?                | Increase  | The area of this species is constantly growing in the Caucasus                                                                                                                                                                | High      |
| 52                       | 9.03 | Under the predicted future climatic conditions, are the risks of dispersal within the RA area posed by the taxon likely to increase, decrease or not change? | Increase  | The area of this species is constantly growing in the Caucasus                                                                                                                                                                | High      |
| 53                       | 9.04 | Under the predicted future climatic conditions, what is the likely magnitude of future potential impacts on biodiversity and/or ecological integrity/status? | Higher    | Potential impacts on the local biodiversity caused by P. parva will be increased in the future.                                                                                                                               | High      |
| 54                       | 9.05 | Under the predicted future climatic conditions, what is the likely magnitude of future potential impacts on ecosystem structure and/or function?             | Higher    | Potential impacts on the local biodiversity caused by P. parva will be increased in the future.                                                                                                                               | High      |
| 55                       | 9.06 | Under the predicted future climatic conditions, what is the likely magnitude of future potential impacts on ecosystem services/socio-economic factors?       | No change | Future potential impacts on the ecosystem services/socio economic development caused by P. parva is unclear for the Caucasus region.                                                                                          | Medium    |

| Statistics                                     |             |
|------------------------------------------------|-------------|
| Scores                                         |             |
| <b>BRA</b>                                     | <b>47.0</b> |
| <b>BRA Outcome</b>                             | <b>-</b>    |
| <b>BRA+CCA</b>                                 | <b>57.0</b> |
| <b>BRA+CCA Outcome</b>                         | <b>-</b>    |
| Score partition                                |             |
| <b>A. Biogeography/Historical</b>              | <b>22.0</b> |
| 1. Domestication/Cultivation                   | 2.0         |
| 2. Climate, distribution and introduction risk | 2.0         |
| 3. Invasive elsewhere                          | 18.0        |
| <b>B. Biology/Ecology</b>                      | <b>25.0</b> |
| 4. Undesirable (or persistence) traits         | 8.0         |
| 5. Resource exploitation                       | 7.0         |
| 6. Reproduction                                | 1.0         |
| 7. Dispersal mechanisms                        | 7.0         |
| 8. Tolerance attributes                        | 2.0         |
| <b>C. Climate change</b>                       | <b>10.0</b> |
| 9. Climate change                              | 10.0        |
| Answered Questions                             |             |
| <b>Total</b>                                   | <b>55</b>   |
| <b>A. Biogeography/Historical</b>              | <b>13</b>   |
| 1. Domestication/Cultivation                   | 3           |
| 2. Climate, distribution and introduction risk | 5           |
| 3. Invasive elsewhere                          | 5           |
| <b>B. Biology/Ecology</b>                      | <b>36</b>   |
| 4. Undesirable (or persistence) traits         | 12          |
| 5. Resource exploitation                       | 2           |
| 6. Reproduction                                | 7           |
| 7. Dispersal mechanisms                        | 9           |
| 8. Tolerance attributes                        | 6           |
| <b>C. Climate change</b>                       | <b>6</b>    |
| 9. Climate change                              | 6           |
| Sectors affected                               |             |
| <b>Commercial</b>                              | <b>17</b>   |
| <b>Environmental</b>                           | <b>17</b>   |
| <b>Species or population nuisance traits</b>   | <b>28</b>   |

| Thresholds     |             |
|----------------|-------------|
| <b>BRA</b>     | <b>-</b>    |
| <b>BRA+CCA</b> | <b>-</b>    |
| Confidence     |             |
| <b>BRA+CCA</b> | <b>0.77</b> |
| <b>BRA</b>     | <b>0.78</b> |
| <b>CCA</b>     | <b>0.75</b> |

| Date and Time       |
|---------------------|
| 13/05/2022 17:16:59 |

## AS-ISK v2

| Taxon and Assessor details         |                                                                                                                                 |
|------------------------------------|---------------------------------------------------------------------------------------------------------------------------------|
| Category                           | Fishes and Lampreys (freshwater)                                                                                                |
| Taxon name                         | <i>Pseudorasbora parva</i>                                                                                                      |
| Common name                        | topmouth gudgeon                                                                                                                |
| Assessor                           | Tatia Kuljanishvili                                                                                                             |
| Risk screening context             |                                                                                                                                 |
| Reason and socio-economic benefits | Stone moroko, <i>Pseudorasbora parva</i> (Temminck & Schlegel, 1846), has been distributed outside                              |
| Risk assessment area               | South Caucasus                                                                                                                  |
| Taxonomy                           | Actinopterygii (ray-finned fishes) Cypriniformes (Carps) Cyprinidae (Minnows or carps) Gobioninae                               |
| Native range                       | Asia: Amur to Zhujiang [Pearl River] drainages in Siberia, Korea and China                                                      |
| Introduced range                   | Introduced to various areas in Europe and Asia.                                                                                 |
| URL                                | <a href="https://www.fishbase.de/summary/Pseudorasbora-parva.html">https://www.fishbase.de/summary/Pseudorasbora-parva.html</a> |

|                                                |      | Response                                                                                                                                                                | Justification (references and/or other information) | Confidence                                                                                                                                                                                                                                                                                                        |           |
|------------------------------------------------|------|-------------------------------------------------------------------------------------------------------------------------------------------------------------------------|-----------------------------------------------------|-------------------------------------------------------------------------------------------------------------------------------------------------------------------------------------------------------------------------------------------------------------------------------------------------------------------|-----------|
| A. Biogeography/Historical                     |      |                                                                                                                                                                         |                                                     |                                                                                                                                                                                                                                                                                                                   |           |
| 1. Domestication/Cultivation                   |      |                                                                                                                                                                         |                                                     |                                                                                                                                                                                                                                                                                                                   |           |
| 1                                              | 1.01 | Has the taxon been the subject of domestication (or cultivation) for at least 20 generations?                                                                           | No                                                  | No trade value                                                                                                                                                                                                                                                                                                    | High      |
| 2                                              | 1.02 | Is the taxon harvested in the wild and likely to be sold or used in its live form?                                                                                      | No                                                  | It is not harvested or sold deliberately, however it is often the contaminant of aquaculture parcels, can be transported in live                                                                                                                                                                                  | Low       |
| 3                                              | 1.03 | Does the taxon have invasive races, varieties, sub-taxa or congeners?                                                                                                   | No                                                  | Other species of genus <i>Pseudorasbora</i> are harmless                                                                                                                                                                                                                                                          | Very high |
| 2. Climate, distribution and introduction risk |      |                                                                                                                                                                         |                                                     |                                                                                                                                                                                                                                                                                                                   |           |
| 4                                              | 2.01 | How similar are the climatic conditions of the Risk Assessment (RA) area and the taxon's native range?                                                                  | Medium                                              | According to the Koppen-Geiger climate classification system Source (Amur basin, Korea, central and southern Japan, northern and central China and Taiwan) and Target area (Southern Caucasus) climates are not quite similar.                                                                                    | High      |
| 5                                              | 2.02 | What is the quality of the climate matching data?                                                                                                                       | High                                                | I run climatch and the all the lowland areas are matching (8 out of 10) and only one mountainous area is 7,                                                                                                                                                                                                       | High      |
| 6                                              | 2.03 | Is the taxon already present outside of captivity in the RA area?                                                                                                       | Yes                                                 | <i>P. parva</i> is widely distributed in the RA area (Elanidze 1983; Pipoyan 2012; Ninua et al. 2013; Pipoyan & Kh.Arakelyan 2015; Karabanov et al. 2013; Pipoyan 2012; Ninua et al. 2013;                                                                                                                        | Very high |
| 7                                              | 2.04 | How many potential vectors could the taxon use to enter in the RA area?                                                                                                 | >1                                                  | aquaculture, recreational fishing, ornamental fish trade and natural dispersal.                                                                                                                                                                                                                                   | Very high |
| 8                                              | 2.05 | Is the taxon currently found in close proximity to, and likely to enter into, the RA area in the near future (e.g. unintentional and intentional introductions)?        | Yes                                                 | <i>P. parva</i> is already established throughout the RA area (Kuljanishvili et al, 2020)                                                                                                                                                                                                                         | Very high |
| 3. Invasive elsewhere                          |      |                                                                                                                                                                         |                                                     |                                                                                                                                                                                                                                                                                                                   |           |
| 9                                              | 3.01 | Has the taxon become naturalised (established viable populations) outside its native range?                                                                             | Yes                                                 | Introduction of <i>P. parva</i> (sexual maturity occurs when they are 1yo) in the territory of Georgia and Armenia was introduced in 1960s (Elanidze 1983; Pipoyan 2012; Ninua et al. 2013; Pipoyan & Kh.Arakelyan 2015), almost 6 decades this species exist, they naturalize and established their populations. | Very high |
| 10                                             | 3.02 | In the taxon's introduced range, are there known adverse impacts to wild stocks or commercial taxa?                                                                     | Yes                                                 | When established, <i>P. parva</i> creates dense populations, that increases the competition with native species for resources (Britton et al, 2007). It can be a host of a novel fish pathogen to Europe <i>Sphaerothecum destruens</i> (Gozlan et al. 2005).                                                     | Very high |
| 11                                             | 3.03 | In the taxon's introduced range, are there known adverse impacts to aquaculture?                                                                                        | No                                                  | It can affect the pond aquaculture trough the competition for the resources and pathogen transfer.                                                                                                                                                                                                                | Medium    |
| 12                                             | 3.04 | In the taxon's introduced range, are there known adverse impacts to ecosystem                                                                                           | Yes                                                 | 1) can affect pond aquaculture food production; 2)can transmit diseases; 3) does not have recreational value                                                                                                                                                                                                      | Medium    |
| 13                                             | 3.05 | In the taxon's introduced range, are there known adverse socio-economic impacts?                                                                                        | No                                                  | No information available                                                                                                                                                                                                                                                                                          | High      |
| B. Biology/Ecology                             |      |                                                                                                                                                                         |                                                     |                                                                                                                                                                                                                                                                                                                   |           |
| 4. Undesirable (or persistence) traits         |      |                                                                                                                                                                         |                                                     |                                                                                                                                                                                                                                                                                                                   |           |
| 14                                             | 4.01 | Is it likely that the taxon will be poisonous or pose other risks to human health?                                                                                      | No                                                  | Not poisonous                                                                                                                                                                                                                                                                                                     | High      |
| 15                                             | 4.02 | Is it likely that the taxon will smother one or more native taxa (that are not threatened or protected)?                                                                | Yes                                                 | In an introduced area <i>P. parva</i> quickly becomes dominant species and competes with native species for resources (Britton 2010). It is also known to be feeding on other native species eggs or larvae (Pinder et al 2005)                                                                                   | Very high |
| 16                                             | 4.03 | Are there any threatened or protected taxa that the non-native taxon would parasitise in the RA area?                                                                   | No                                                  | Does not parasite                                                                                                                                                                                                                                                                                                 | High      |
| 17                                             | 4.04 | Is the taxon adaptable in terms of climatic and other environmental conditions, thus enhancing its potential persistence if it has invaded or could invade the RA area? | Yes                                                 | <i>P. parva</i> has been found in a transboundary lake (Lake Kartsakhi) between Georgia and Turkey, which is around 2000 m a.s.l. (Kuljanishvili et al, 2020)                                                                                                                                                     | Very high |
| 18                                             | 4.05 | Is the taxon likely to disrupt food-web structure/function in aquatic ecosystems if it has invaded or is likely to invade the RA                                        | Yes                                                 | in a pond where <i>P. parva</i> was invaded they conducted Stable isotope analysis and found out = apparent trophic position shift for several fishes (See: Britton et al 2010)                                                                                                                                   | Medium    |
| 19                                             | 4.06 | Is the taxon likely to exert adverse impacts on ecosystem services in the RA area?                                                                                      | Yes                                                 | impacts recreational fisheries can affect pond aquaculture                                                                                                                                                                                                                                                        | Medium    |
| 20                                             | 4.07 | Is it likely that the taxon will host, and/or act as a vector for, recognised pests and infectious agents that are endemic in the RA                                    | Yes                                                 | No information about endemic pests and infectious agents in the region.                                                                                                                                                                                                                                           | Low       |
| 21                                             | 4.08 | Is it likely that the taxon will host, and/or act as a vector for, recognised pests and infectious agents that are absent from (novel to) the RA area?                  | Yes                                                 | <i>P. parva</i> is healthy host of a novel fish pathogen to Europe <i>Sphaerothecum destruens</i> (Gozlan et al. 2005).                                                                                                                                                                                           | High      |

|                                 |      |                                                                                                                                                                              |     |                                                                                                                                                                                                                                                                                                                                                                                 |           |
|---------------------------------|------|------------------------------------------------------------------------------------------------------------------------------------------------------------------------------|-----|---------------------------------------------------------------------------------------------------------------------------------------------------------------------------------------------------------------------------------------------------------------------------------------------------------------------------------------------------------------------------------|-----------|
| 22                              | 4.09 | Is it likely that the taxon will achieve a body size that will make it more likely to be released from captivity?                                                            | No  | This is a small sized fish max length 12.5 cm.                                                                                                                                                                                                                                                                                                                                  | High      |
| 23                              | 4.10 | Is the taxon capable of sustaining itself in a range of water velocity conditions (e.g. versatile in habitat use)?                                                           | Yes | This species is fast-running water dwelling.                                                                                                                                                                                                                                                                                                                                    | Medium    |
| 24                              | 4.11 | Is it likely that the taxon's mode of existence (e.g. excretion of by-products) or behaviours (e.g. feeding) will reduce habitat quality for native taxa?                    | Yes | Can be the reason of decreasing some native fish populations                                                                                                                                                                                                                                                                                                                    | Medium    |
| 25                              | 4.12 | Is the taxon likely to maintain a viable population even when present in low densities (or persisting in adverse conditions by way of a dormant form)?                       | Yes | phenotype plasticity, fast growth, early maturity, fecundity, reproductive behaviour and resistance to pathogens makes this species able to have sustainable populations even at low densities.                                                                                                                                                                                 | High      |
| <b>5. Resource exploitation</b> |      |                                                                                                                                                                              |     |                                                                                                                                                                                                                                                                                                                                                                                 |           |
| 26                              | 5.01 | Is the taxon likely to consume threatened or protected native taxa in the RA area?                                                                                           | Yes | During the IUCN Red List assessment of Southern Caucasian native species, a few native species have been identified to be alerted by <i>P. parva</i> . It may consume their eggs or larvae.                                                                                                                                                                                     | Medium    |
| 27                              | 5.02 | Is the taxon likely to sequester food resources (including nutrients) to the detriment of native taxa in the RA area?                                                        | Yes | They conducted the Stable Isotopic Analysis on the species in a pond where <i>P.</i> was introduced and they found out significantly depressed somatic growth in <i>R. rutilus</i> , in comparison to the <i>P. parva</i> free pond (Britton et al 2010).                                                                                                                       | High      |
| <b>6. Reproduction</b>          |      |                                                                                                                                                                              |     |                                                                                                                                                                                                                                                                                                                                                                                 |           |
| 28                              | 6.01 | Is the taxon likely to exhibit parental care and/or to reduce age-at-maturity in response to environmental conditions?                                                       | Yes | <i>P. parva</i> exhibits parental care (Gozlan et al 2010)                                                                                                                                                                                                                                                                                                                      | Very high |
| 29                              | 6.02 | Is the taxon likely to produce viable gametes or propagules (in the RA area)?                                                                                                | Yes | Yes. Established in RA since 1960s.                                                                                                                                                                                                                                                                                                                                             | Very high |
| 30                              | 6.03 | Is the taxon likely to hybridise naturally with native taxa?                                                                                                                 | Yes | In introduced range can hybridize with sun bleak <i>Leucaspis deloneatus</i> , which is throughout most part of Europe. In Native range natural cross-hybridization happened due to shared resources between species <i>P. parva</i> and <i>P. pumila</i> (an endangered species for of Japan), and caused extirpation of <i>P. pumila</i> in some places (Gozlan et al. 2005). | Very high |
| 31                              | 6.04 | Is the taxon likely to be hermaphroditic or to display asexual reproduction?                                                                                                 | No  | No. Does not display asexual reproduction                                                                                                                                                                                                                                                                                                                                       | Very high |
| 32                              | 6.05 | Is the taxon dependent on the presence of another taxon (or specific habitat features) to complete its life cycle?                                                           | No  | No. See: <a href="https://www.fishbase.de/summary/Pseudorasbora-parva.html">https://www.fishbase.de/summary/Pseudorasbora-parva.html</a>                                                                                                                                                                                                                                        | Very high |
| 33                              | 6.06 | Is the taxon known (or likely) to produce a large number of propagules or offspring within a short time span (e.g. < 1 year)?                                                | Yes | In introduced areas it can spawn eve earlier than in native range. They are quite plastic about duration and timing of their reproduction, which makes them such successful invaders (Gozlan                                                                                                                                                                                    | High      |
| 34                              | 6.07 | How many time units (days, months, years) does the taxon require to reach the age-at-first-reproduction?                                                                     | 1   | 1 YO                                                                                                                                                                                                                                                                                                                                                                            | Very high |
| <b>7. Dispersal mechanisms</b>  |      |                                                                                                                                                                              |     |                                                                                                                                                                                                                                                                                                                                                                                 |           |
| 35                              | 7.01 | How many potential internal vectors/pathways could the taxon use to disperse within the RA area (with suitable                                                               | >1  | Contaminant of the Aquaculture goods; Intentional translocations by locals as a bait or curiosity                                                                                                                                                                                                                                                                               | High      |
| 36                              | 7.02 | Will any of these vectors/pathways bring the taxon in close proximity to one or more protected areas (e.g. MCZ, MPA, SSSI)?                                                  | Yes | This species is already spread in areas that are protected                                                                                                                                                                                                                                                                                                                      | Very high |
| 37                              | 7.03 | Does the taxon have a means of actively attaching itself to hard substrata (e.g. ship hulls, pilings, buoys) such that it enhances the likelihood of dispersal?              | No  | Although it does not have adaptation of morphological structure that facilitates its attachment to some surfaces, <i>P. parva</i> can spawn on different substrate: rocks, the surfaces of shells, plants and some artificial materials (plastic pipes), thus dispersal via eggs attached to the boats is likely (Pinder and Gozlan 2003)                                       | High      |
| 38                              | 7.04 | Is natural dispersal of the taxon likely to occur as eggs (for animals) or as propagules (for plants: seeds, spores) in the RA area?                                         | Yes | "Eggs laid on floating macrophytes or even the flat surfaces of boats could enable dispersal through connected waterbodies (Pinder and Gozlan 2003)"                                                                                                                                                                                                                            | High      |
| 39                              | 7.05 | Is natural dispersal of the taxon likely to occur as larvae/juveniles (for animals) or as fragments/seedlings (for plants) in the RA area?                                   | Yes | Yes. it is possible.                                                                                                                                                                                                                                                                                                                                                            | High      |
| 40                              | 7.06 | Are older life stages of the taxon likely to migrate in the RA area for reproduction?                                                                                        | No  | This species do not migrate for spawning                                                                                                                                                                                                                                                                                                                                        | Very high |
| 41                              | 7.07 | Are propagules or eggs of the taxon likely to be dispersed in the RA area by other animals?                                                                                  | Yes | possible with some mollusc species                                                                                                                                                                                                                                                                                                                                              | Low       |
| 42                              | 7.08 | Is dispersal of the taxon along any of the vectors/pathways mentioned in the previous seven questions (35–41; i.e. both unintentional or intentional) likely to be           | Yes | In introduced areas it disperses rapidly (one calendar year).                                                                                                                                                                                                                                                                                                                   | Very high |
| 43                              | 7.09 | Is dispersal of the taxon density dependent?                                                                                                                                 | No  | No data                                                                                                                                                                                                                                                                                                                                                                         | Medium    |
| <b>8. Tolerance attributes</b>  |      |                                                                                                                                                                              |     |                                                                                                                                                                                                                                                                                                                                                                                 |           |
| 44                              | 8.01 | Is the taxon able to withstand being out of water for extended periods (e.g. minimum of one or more hours) at some stage of its life cycle?                                  | No  | No data                                                                                                                                                                                                                                                                                                                                                                         | High      |
| 45                              | 8.02 | Is the taxon tolerant of a wide range of water quality conditions relevant to that taxon? [In the Justification field, indicate the relevant water quality variable(s) being | Yes | are plastic to withstand different environmental conditions                                                                                                                                                                                                                                                                                                                     | High      |
| 46                              | 8.03 | Can the taxon be controlled or eradicated in the wild with chemical, biological, or other agents/means?                                                                      | Yes | In some lakes of UK they applied rotenon, de-watering and disinfection, which turned out to be ducessful for eradication <i>P. parva</i> (Britton et al 2008).                                                                                                                                                                                                                  | High      |

|                          |      |                                                                                                                                                              |          |                                                                                                                                                                                                                                                     |        |
|--------------------------|------|--------------------------------------------------------------------------------------------------------------------------------------------------------------|----------|-----------------------------------------------------------------------------------------------------------------------------------------------------------------------------------------------------------------------------------------------------|--------|
| 47                       | 8.04 | Is the taxon likely to tolerate or benefit from environmental/human disturbance?                                                                             | Yes      | Yes. Does not mind environmental or human disturbance                                                                                                                                                                                               | High   |
| 48                       | 8.05 | Is the taxon able to tolerate salinity levels that are higher or lower than those found in its usual environment?                                            | No       | P. parva can not tolerance brackish waters. Estuaries are more of barriers for it's dispersal (Scott et al 2007)                                                                                                                                    | High   |
| 49                       | 8.06 | Are there effective natural enemies (predators) of the taxon present in the RA                                                                               | No       | No effective natural enemies present in RA area                                                                                                                                                                                                     | Medium |
| <b>C. Climate change</b> |      |                                                                                                                                                              |          |                                                                                                                                                                                                                                                     |        |
| <b>9. Climate change</b> |      |                                                                                                                                                              |          |                                                                                                                                                                                                                                                     |        |
| 50                       | 9.01 | Under the predicted future climatic conditions, are the risks of entry into the RA area posed by the taxon likely to increase, decrease or not change?       | Increase | It was hypothesises that climate change might alert the mechanisms of transportation and introduction of non-native species. Commercial and recreational activities will increase, that itself increases the propaule pressure levels of non-native | High   |
| 51                       | 9.02 | Under the predicted future climatic conditions, are the risks of establishment posed by the taxon likely to increase, decrease or not change?                | Increase | In terms of increased temperatures, the climate of the RA will become more similar to its native area, and P. parva will definitely benefit by this change                                                                                          | High   |
| 52                       | 9.03 | Under the predicted future climatic conditions, are the risks of dispersal within the RA area posed by the taxon likely to increase, decrease or not change? | Increase | They already are distributed everywhere. Increased temperatures might allow them to spread to upper altitudes.                                                                                                                                      | Medium |
| 53                       | 9.04 | Under the predicted future climatic conditions, what is the likely magnitude of future potential impacts on biodiversity and/or ecological integrity/status? | Higher   | This species will reach higher densities and it will affect native fish species in terms of competition, distribution of pathogens.                                                                                                                 | Medium |
| 54                       | 9.05 | Under the predicted future climatic conditions, what is the likely magnitude of future potential impacts on ecosystem structure and/or function?             | Higher   | It can affect native organisms and cause their decrease.                                                                                                                                                                                            | Medium |
| 55                       | 9.06 | Under the predicted future climatic conditions, what is the likely magnitude of future potential impacts on ecosystem services/socio-economic factors?       | Higher   | It can affect recreational fisheries (since this specie is considered as weed within locals); and it can affect pond aquaculture production.                                                                                                        | High   |

| Statistics                                     |      |
|------------------------------------------------|------|
| Scores                                         |      |
| BRA                                            | 32.0 |
| BRA Outcome                                    | -    |
| BRA+CCA                                        | 44.0 |
| BRA+CCA Outcome                                | -    |
| Score partition                                |      |
| A. Biogeography/Historical                     | 5.0  |
| 1. Domestication/Cultivation                   | -2.0 |
| 2. Climate, distribution and introduction risk | 2.0  |
| 3. Invasive elsewhere                          | 5.0  |
| B. Biology/Ecology                             | 27.0 |
| 4. Undesirable (or persistence) traits         | 9.0  |
| 5. Resource exploitation                       | 7.0  |
| 6. Reproduction                                | 5.0  |
| 7. Dispersal mechanisms                        | 4.0  |
| 8. Tolerance attributes                        | 2.0  |
| C. Climate change                              | 12.0 |
| 9. Climate change                              | 12.0 |
| Answered Questions                             |      |
| Total                                          | 55   |
| A. Biogeography/Historical                     | 13   |
| 1. Domestication/Cultivation                   | 3    |
| 2. Climate, distribution and introduction risk | 5    |
| 3. Invasive elsewhere                          | 5    |
| B. Biology/Ecology                             | 36   |
| 4. Undesirable (or persistence) traits         | 12   |
| 5. Resource exploitation                       | 2    |
| 6. Reproduction                                | 7    |
| 7. Dispersal mechanisms                        | 9    |
| 8. Tolerance attributes                        | 6    |
| C. Climate change                              | 6    |
| 9. Climate change                              | 6    |
| Sectors affected                               |      |
| Commercial                                     | 7    |
| Environmental                                  | 15   |
| Species or population nuisance traits          | 27   |

| Thresholds |      |
|------------|------|
| BRA        | -    |
| BRA+CCA    | -    |
| Confidence |      |
| BRA+CCA    | 0.75 |
| BRA        | 0.76 |
| CCA        | 0.63 |

| Date and Time       |  |
|---------------------|--|
| 21/05/2022 15:09:13 |  |



## AS-ISK v2

| Taxon and Assessor details         |                                                                                                                                     |
|------------------------------------|-------------------------------------------------------------------------------------------------------------------------------------|
| Category                           | Fishes and Lampreys (freshwater)                                                                                                    |
| Taxon name                         | <i>Rhinogobius lindbergi</i>                                                                                                        |
| Common name                        | Lin's goby                                                                                                                          |
| Assessor                           | Bella Japoshvili                                                                                                                    |
| Risk screening context             |                                                                                                                                     |
| Reason and socio-economic benefits | Newly introduced species in the RA area                                                                                             |
| Risk assessment area               | South Caucasus                                                                                                                      |
| Taxonomy                           | Actinopteri (ray-finned fishes) > Gobiiformes (Gobies) > Gobiidae (Gobies)                                                          |
| Native range                       | Amur River                                                                                                                          |
| Introduced range                   | Asia                                                                                                                                |
| URL                                | <a href="https://www.fishbase.de/summary/Rhinogobius-lindbergi.html">https://www.fishbase.de/summary/Rhinogobius-lindbergi.html</a> |

|                                                |      |                                                                                                                                                                         | Response | Justification (references and/or other information)                                                                                                                                                                                                                                                                                                                                                                                      | Confidence |
|------------------------------------------------|------|-------------------------------------------------------------------------------------------------------------------------------------------------------------------------|----------|------------------------------------------------------------------------------------------------------------------------------------------------------------------------------------------------------------------------------------------------------------------------------------------------------------------------------------------------------------------------------------------------------------------------------------------|------------|
| A. Biogeography/Historical                     |      |                                                                                                                                                                         |          |                                                                                                                                                                                                                                                                                                                                                                                                                                          |            |
| 1. Domestication/Cultivation                   |      |                                                                                                                                                                         |          |                                                                                                                                                                                                                                                                                                                                                                                                                                          |            |
| 1                                              | 1.01 | Has the taxon been the subject of domestication (or cultivation) for at least 20 generations?                                                                           | No       | Species does not have any economic or ornamental value                                                                                                                                                                                                                                                                                                                                                                                   | Very high  |
| 2                                              | 1.02 | Is the taxon harvested in the wild and likely to be sold or used in its live form?                                                                                      | No       | No documented evidence though the species does not have any economic or ornamental values thus no reason behind                                                                                                                                                                                                                                                                                                                          | High       |
| 3                                              | 1.03 | Does the taxon have invasive races, varieties, sub-taxa or congeners?                                                                                                   | Yes      | Congeners                                                                                                                                                                                                                                                                                                                                                                                                                                | High       |
| 2. Climate, distribution and introduction risk |      |                                                                                                                                                                         |          |                                                                                                                                                                                                                                                                                                                                                                                                                                          |            |
| 4                                              | 2.01 | How similar are the climatic conditions of the Risk Assessment (RA) area and the taxon's native range?                                                                  | Low      | Result of climatch algorithm                                                                                                                                                                                                                                                                                                                                                                                                             | Medium     |
| 5                                              | 2.02 | What is the quality of the climate matching data?                                                                                                                       | Low      | Due to low accuracy of clomal imate data                                                                                                                                                                                                                                                                                                                                                                                                 | High       |
| 6                                              | 2.03 | Is the taxon already present outside of captivity in the RA area?                                                                                                       | Yes      | Japoshvili B, Lipinskaya T, Gajduchenko H, Sinchuk A, Bikashvili A, Mumladze L. 2020. First DNA-based records of new alien freshwater species in the Republic of Georgia. Acta Zool Bulgar 72: 545–551; Epitashvili G, Geiger MF, Astrin JJ, Herder F, Japoshvili B, Mumladze L. 2020. Towards retrieving the Promethean treasure: a first molecular assessment of the freshwater fish diversity of Georgia. Biodivers Data J 8: e57862. | Very high  |
| 7                                              | 2.04 | How many potential vectors could the taxon use to enter in the RA area?                                                                                                 | > 1      | Human mediated translocation; natural dispersal                                                                                                                                                                                                                                                                                                                                                                                          | Medium     |
| 8                                              | 2.05 | Is the taxon currently found in close proximity to, and likely to enter into, the RA area in the near future (e.g. unintentional and intentional introductions)?        | Yes      | Sadeghi R, Esmaeili HR, Zarei F, Esmaeili A, Abbasi K. 2019. The taxonomic status of an introduced freshwater goby of the genus <i>Rhinogobius</i> to Iran (Teleostei: Gobiidae). Zool Middle East 65: 51–58.                                                                                                                                                                                                                            | Very high  |
| 3. Invasive elsewhere                          |      |                                                                                                                                                                         |          |                                                                                                                                                                                                                                                                                                                                                                                                                                          |            |
| 9                                              | 3.01 | Has the taxon become naturalised (established viable populations) outside its native range?                                                                             | Yes      | Sadeghi R, Esmaeili HR, Zarei F, Esmaeili A, Abbasi K. 2019. The taxonomic status of an introduced freshwater goby of the genus <i>Rhinogobius</i> to Iran (Teleostei: Gobiidae). Zool Middle East 65: 51–58; Japoshvili B, Lipinskaya T, Gajduchenko H, Sinchuk A, Bikashvili A, Mumladze L. 2020. First DNA-based records of new alien freshwater species in the Republic of Georgia. Acta Zool Bulgar 72: 545–551                     | Very high  |
| 10                                             | 3.02 | In the taxon's introduced range, are there known adverse impacts to wild stocks or commercial taxa?                                                                     | No       | No documented evidence                                                                                                                                                                                                                                                                                                                                                                                                                   | Low        |
| 11                                             | 3.03 | In the taxon's introduced range, are there known adverse impacts to aquaculture?                                                                                        | No       | No documented evidence                                                                                                                                                                                                                                                                                                                                                                                                                   | Low        |
| 12                                             | 3.04 | In the taxon's introduced range, are there known adverse impacts to ecosystem                                                                                           | No       | No documented evidence                                                                                                                                                                                                                                                                                                                                                                                                                   | Low        |
| 13                                             | 3.05 | In the taxon's introduced range, are there known adverse socio-economic impacts?                                                                                        | No       | No documented evidence                                                                                                                                                                                                                                                                                                                                                                                                                   | Low        |
| B. Biology/Ecology                             |      |                                                                                                                                                                         |          |                                                                                                                                                                                                                                                                                                                                                                                                                                          |            |
| 4. Undesirable (or persistence) traits         |      |                                                                                                                                                                         |          |                                                                                                                                                                                                                                                                                                                                                                                                                                          |            |
| 14                                             | 4.01 | Is it likely that the taxon will be poisonous or pose other risks to human health?                                                                                      | No       | Not a harmful species                                                                                                                                                                                                                                                                                                                                                                                                                    | Very high  |
| 15                                             | 4.02 | Is it likely that the taxon will smother one or more native taxa (that are not threatened or protected)?                                                                | Yes      | No documented evidence exists                                                                                                                                                                                                                                                                                                                                                                                                            | Low        |
| 16                                             | 4.03 | Are there any threatened or protected taxa that the non-native taxon would parasitise in the RA area?                                                                   | No       | Species is not parasite nor pronounced predator                                                                                                                                                                                                                                                                                                                                                                                          | Very high  |
| 17                                             | 4.04 | Is the taxon adaptable in terms of climatic and other environmental conditions, thus enhancing its potential persistence if it has invaded or could invade the RA area? | No       | No documented evidence exists                                                                                                                                                                                                                                                                                                                                                                                                            | Low        |
| 18                                             | 4.05 | Is the taxon likely to disrupt food-web structure/function in aquatic ecosystems if it has invaded or is likely to invade the RA                                        | Yes      | No documented evidence exists                                                                                                                                                                                                                                                                                                                                                                                                            | Low        |
| 19                                             | 4.06 | Is the taxon likely to exert adverse impacts on ecosystem services in the RA area?                                                                                      | Yes      | No documented evidence exists                                                                                                                                                                                                                                                                                                                                                                                                            | Low        |
| 20                                             | 4.07 | Is it likely that the taxon will host, and/or act as a vector for, recognised pests and infectious agents that are endemic in the RA                                    | No       | No such an endmeic pests/infectious deseazes are known from the RA area                                                                                                                                                                                                                                                                                                                                                                  | Low        |

|                                 |      |                                                                                                                                                                              |     |                                                                                                          |           |
|---------------------------------|------|------------------------------------------------------------------------------------------------------------------------------------------------------------------------------|-----|----------------------------------------------------------------------------------------------------------|-----------|
| 21                              | 4.08 | Is it likely that the taxon will host, and/or act as a vector for, recognised pests and infectious agents that are absent from (novel to) the RA area?                       | Yes | Expected but no documented evidence exists                                                               | Low       |
| 22                              | 4.09 | Is it likely that the taxon will achieve a body size that will make it more likely to be released from captivity?                                                            | No  | Small bodied fish generally not exceeds 10 cm in length                                                  | Low       |
| 23                              | 4.10 | Is the taxon capable of sustaining itself in a range of water velocity conditions (e.g. versatile in habitat use)?                                                           | Yes | Although no documented evidence exists                                                                   | Low       |
| 24                              | 4.11 | Is it likely that the taxon's mode of existence (e.g. excretion of by-products) or behaviours (e.g. feeding) will reduce habitat quality for native taxa?                    | No  | No documented evidence exists                                                                            | Low       |
| 25                              | 4.12 | Is the taxon likely to maintain a viable population even when present in low densities (or persisting in adverse conditions by way of a dormant form)?                       | Yes | Based on professional judgment but no documented evidence exists                                         | Low       |
| <b>5. Resource exploitation</b> |      |                                                                                                                                                                              |     |                                                                                                          |           |
| 26                              | 5.01 | Is the taxon likely to consume threatened or protected native taxa in the RA area?                                                                                           | Yes | Some invertebrates although not documented evidences exists                                              | Low       |
| 27                              | 5.02 | Is the taxon likely to sequester food resources (including nutrients) to the detriment of native taxa in the RA area?                                                        | Yes | Similar species of the same family                                                                       | Medium    |
| <b>6. Reproduction</b>          |      |                                                                                                                                                                              |     |                                                                                                          |           |
| 28                              | 6.01 | Is the taxon likely to exhibit parental care and/or to reduce age-at-maturity in response to environmental conditions?                                                       | Yes | Guarding eggs and nest                                                                                   | High      |
| 29                              | 6.02 | Is the taxon likely to produce viable gametes or propagules (in the RA area)?                                                                                                | Yes | Already recorded in a number of areas in the RA area Kuljanishvili et al., 2021 and own unpublished data | Very high |
| 30                              | 6.03 | Is the taxon likely to hybridise naturally with native taxa?                                                                                                                 | No  | No documented evidence exists                                                                            | Medium    |
| 31                              | 6.04 | Is the taxon likely to be hermaphroditic or to display asexual reproduction?                                                                                                 | No  | No such an evidence exists                                                                               | High      |
| 32                              | 6.05 | Is the taxon dependent on the presence of another taxon (or specific habitat features) to complete its life cycle?                                                           | No  | No such an evidence exists                                                                               | High      |
| 33                              | 6.06 | Is the taxon known (or likely) to produce a large number of propagules or offspring within a short time span (e.g. < 1 year)?                                                | No  | No such an evidence exists                                                                               | Low       |
| 34                              | 6.07 | How many time units (days, months, years) does the taxon require to reach the age-at-first-reproduction?                                                                     | 1   | Years                                                                                                    | High      |
| <b>7. Dispersal mechanisms</b>  |      |                                                                                                                                                                              |     |                                                                                                          |           |
| 35                              | 7.01 | How many potential internal vectors/pathways could the taxon use to disperse within the RA area (with suitable)                                                              | > 1 | Human mediated unintentional translocation, natural dispersal                                            | Medium    |
| 36                              | 7.02 | Will any of these vectors/pathways bring the taxon in close proximity to one or more protected areas (e.g. MCZ, MPA, SSSI)?                                                  | Yes | Colchis national park along the Black Sea                                                                | Medium    |
| 37                              | 7.03 | Does the taxon have a means of actively attaching itself to hard substrata (e.g. ship hulls, pilings, buoys) such that it enhances the likelihood of dispersal?              | No  | No such an evidence exists                                                                               | High      |
| 38                              | 7.04 | Is natural dispersal of the taxon likely to occur as eggs (for animals) or as propagules (for plants: seeds, spores) in the RA area?                                         | No  | No such an evidence exists                                                                               | High      |
| 39                              | 7.05 | Is natural dispersal of the taxon likely to occur as larvae/juveniles (for animals) or as fragments/seedlings (for plants) in the RA area?                                   | Yes | Naturally occurring in part of the RA area most probably already dispersing through water currents       | Medium    |
| 40                              | 7.06 | Are older life stages of the taxon likely to migrate in the RA area for reproduction?                                                                                        | No  | No documented evidence exists                                                                            | Low       |
| 41                              | 7.07 | Are propagules or eggs of the taxon likely to be dispersed in the RA area by other animals?                                                                                  | No  | No such an evidence exists                                                                               | Low       |
| 42                              | 7.08 | Is dispersal of the taxon along any of the vectors/pathways mentioned in the previous seven questions (35–41; i.e. both unintentional or intentional) likely to be           | Yes | Due to interconnectivity the species can be spread actively within the RA area                           | Low       |
| 43                              | 7.09 | Is dispersal of the taxon density dependent?                                                                                                                                 | No  | No such an evidence exists                                                                               | Low       |
| <b>8. Tolerance attributes</b>  |      |                                                                                                                                                                              |     |                                                                                                          |           |
| 44                              | 8.01 | Is the taxon able to withstand being out of water for extended periods (e.g. minimum of one or more hours) at some stage of its life cycle?                                  | No  | No such an evidence exists                                                                               | Low       |
| 45                              | 8.02 | Is the taxon tolerant of a wide range of water quality conditions relevant to that taxon? [In the Justification field, indicate the relevant water quality variable(s) being | No  | No such an evidence exists                                                                               | Low       |
| 46                              | 8.03 | Can the taxon be controlled or eradicated in the wild with chemical, biological, or other agents/means?                                                                      | No  | No such an evidence exists                                                                               | Medium    |
| 47                              | 8.04 | Is the taxon likely to tolerate or benefit from environmental/human disturbance?                                                                                             | No  | No documented evidence                                                                                   | Low       |

|                          |      |                                                                                                                                                              |           |                                 |     |
|--------------------------|------|--------------------------------------------------------------------------------------------------------------------------------------------------------------|-----------|---------------------------------|-----|
| 48                       | 8.05 | Is the taxon able to tolerate salinity levels that are higher or lower than those found in its usual environment?                                            | No        | No such an evidence exists      | Low |
| 49                       | 8.06 | Are there effective natural enemies (predators) of the taxon present in the RA                                                                               | No        | No such an evidence exists      | Low |
| <b>C. Climate change</b> |      |                                                                                                                                                              |           |                                 |     |
| <b>9. Climate change</b> |      |                                                                                                                                                              |           |                                 |     |
| 50                       | 9.01 | Under the predicted future climatic conditions, are the risks of entry into the RA area posed by the taxon likely to increase, decrease or not change?       | No change | Based on professional judgement | Low |
| 51                       | 9.02 | Under the predicted future climatic conditions, are the risks of establishment posed by the taxon likely to increase, decrease or not change?                | Increase  | Based on professional judgement | Low |
| 52                       | 9.03 | Under the predicted future climatic conditions, are the risks of dispersal within the RA area posed by the taxon likely to increase, decrease or not change? | Increase  | Based on professional judgement | Low |
| 53                       | 9.04 | Under the predicted future climatic conditions, what is the likely magnitude of future potential impacts on biodiversity and/or ecological integrity/status? | Higher    | Based on professional judgement | Low |
| 54                       | 9.05 | Under the predicted future climatic conditions, what is the likely magnitude of future potential impacts on ecosystem structure and/or function?             | Higher    | Based on professional judgement | Low |
| 55                       | 9.06 | Under the predicted future climatic conditions, what is the likely magnitude of future potential impacts on ecosystem services/socio-economic factors?       | Higher    | Based on professional judgement | Low |

| Statistics                                     |             |
|------------------------------------------------|-------------|
| Scores                                         |             |
| <b>BRA</b>                                     | <b>16.0</b> |
| <b>BRA Outcome</b>                             | <b>-</b>    |
| <b>BRA+CCA</b>                                 | <b>26.0</b> |
| <b>BRA+CCA Outcome</b>                         | <b>-</b>    |
| Score partition                                |             |
| <b>A. Biogeography/Historical</b>              | <b>4.0</b>  |
| 1. Domestication/Cultivation                   | 0.0         |
| 2. Climate, distribution and introduction risk | 2.0         |
| 3. Invasive elsewhere                          | 2.0         |
| <b>B. Biology/Ecology</b>                      | <b>12.0</b> |
| 4. Undesirable (or persistence) traits         | 5.0         |
| 5. Resource exploitation                       | 7.0         |
| 6. Reproduction                                | 2.0         |
| 7. Dispersal mechanisms                        | 0.0         |
| 8. Tolerance attributes                        | -2.0        |
| <b>C. Climate change</b>                       | <b>10.0</b> |
| 9. Climate change                              | 10.0        |
| Answered Questions                             |             |
| <b>Total</b>                                   | <b>55</b>   |
| <b>A. Biogeography/Historical</b>              | <b>13</b>   |
| 1. Domestication/Cultivation                   | 3           |
| 2. Climate, distribution and introduction risk | 5           |
| 3. Invasive elsewhere                          | 5           |
| <b>B. Biology/Ecology</b>                      | <b>36</b>   |
| 4. Undesirable (or persistence) traits         | 12          |
| 5. Resource exploitation                       | 2           |
| 6. Reproduction                                | 7           |
| 7. Dispersal mechanisms                        | 9           |
| 8. Tolerance attributes                        | 6           |
| <b>C. Climate change</b>                       | <b>6</b>    |
| 9. Climate change                              | 6           |
| Sectors affected                               |             |
| <b>Commercial</b>                              | <b>5</b>    |
| <b>Environmental</b>                           | <b>12</b>   |
| <b>Species or population nuisance traits</b>   | <b>14</b>   |

| Thresholds     |             |
|----------------|-------------|
| <b>BRA</b>     | <b>-</b>    |
| <b>BRA+CCA</b> | <b>-</b>    |
| Confidence     |             |
| <b>BRA+CCA</b> | <b>0.46</b> |
| <b>BRA</b>     | <b>0.49</b> |
| <b>CCA</b>     | <b>0.25</b> |

| Date and Time       |
|---------------------|
| 16/05/2022 21:56:59 |

## AS-ISK v2

| Taxon and Assessor details         |                                                                                                                                     |
|------------------------------------|-------------------------------------------------------------------------------------------------------------------------------------|
| Category                           | Fishes and Lampreys (freshwater)                                                                                                    |
| Taxon name                         | <i>Rhinogobius lindbergi</i>                                                                                                        |
| Common name                        | Lin's goby                                                                                                                          |
| Assessor                           | Giorgi Epitashvili                                                                                                                  |
| Risk screening context             |                                                                                                                                     |
| Reason and socio-economic benefits | Rhinogobius lindbergi is described species from Amur and Ussuri rivers, Russia (Eagderi et al.                                      |
| Risk assessment area               | South Caucasus                                                                                                                      |
| Taxonomy                           | Rhinogobius lindbergi Berg 1933                                                                                                     |
| Native range                       | Amur and Ussuri river basins, far eastern part of Russia                                                                            |
| Introduced range                   | Introduced in freshwater systems of Mongolia (Neely et al. 2008), Kazakhstan (Kopylets &                                            |
| URL                                | <a href="https://www.fishbase.in/summary/Rhinogobius-lindbergi.html">https://www.fishbase.in/summary/Rhinogobius-lindbergi.html</a> |

|                                                |      |                                                                                                                                                                         | Response       | Justification (references and/or other information)                                                                                                                                                                                        | Confidence |
|------------------------------------------------|------|-------------------------------------------------------------------------------------------------------------------------------------------------------------------------|----------------|--------------------------------------------------------------------------------------------------------------------------------------------------------------------------------------------------------------------------------------------|------------|
| A. Biogeography/Historical                     |      |                                                                                                                                                                         |                |                                                                                                                                                                                                                                            |            |
| 1. Domestication/Cultivation                   |      |                                                                                                                                                                         |                |                                                                                                                                                                                                                                            |            |
| 1                                              | 1.01 | Has the taxon been the subject of domestication (or cultivation) for at least 20 generations?                                                                           | No             | There are no data on the cultivation of this species because it is a very small fish and has no economical or recreational importance.                                                                                                     | Medium     |
| 2                                              | 1.02 | Is the taxon harvested in the wild and likely to be sold or used in its live form?                                                                                      | No             | This species is a very small sized fish and has no economical or recreational importance.                                                                                                                                                  | Medium     |
| 3                                              | 1.03 | Does the taxon have invasive races, varieties, sub-taxa or congeners?                                                                                                   | Yes            | This fish is occurring in Iran, North-eastern Anatolia and South Caucasus region and considered as invasive species for the above mentioned regions (biodiversity-georgia.net).                                                            | Very high  |
| 2. Climate, distribution and introduction risk |      |                                                                                                                                                                         |                |                                                                                                                                                                                                                                            |            |
| 4                                              | 2.01 | How similar are the climatic conditions of the Risk Assessment (RA) area and the taxon's native range?                                                                  | Medium         | Köppen-Geiger climate classification map.                                                                                                                                                                                                  | Medium     |
| 5                                              | 2.02 | What is the quality of the climate matching data?                                                                                                                       | Medium         | Köppen-Geiger climate classification map.                                                                                                                                                                                                  | Medium     |
| 6                                              | 2.03 | Is the taxon already present outside of captivity in the RA area?                                                                                                       | Yes            | R. lindbergi found in some reservoirs of the SC region (Japoshvili et al. 2020; Kuljanishvili et al. 2020; Epitashvili et al. 2020).                                                                                                       | Very high  |
| 7                                              | 2.04 | How many potential vectors could the taxon use to enter in the RA area?                                                                                                 | One            | Rhinogobius lindbergi spread unintentionally in the southern Caucasus region as well as throughout its area of invasion.                                                                                                                   | Medium     |
| 8                                              | 2.05 | Is the taxon currently found in close proximity to, and likely to enter into, the RA area in the near future (e.g. unintentional and intentional introductions)?        | Yes            | This species is occurring in Iran (Eagderi et al. 2018).                                                                                                                                                                                   | Very high  |
| 3. Invasive elsewhere                          |      |                                                                                                                                                                         |                |                                                                                                                                                                                                                                            |            |
| 9                                              | 3.01 | Has the taxon become naturalised (established viable populations) outside its introduced range?                                                                         | Yes            | R. lindbergi has stable/viable populations in Iran (Eagderi et al. 2018).                                                                                                                                                                  | Very high  |
| 10                                             | 3.02 | In the taxon's introduced range, are there known adverse impacts to wild stocks or commercial taxa?                                                                     | Yes            | There are some warnings with regard to the potential effect of R. lindbergi on the native fish fauna (Neely et al. 2008)                                                                                                                   | High       |
| 11                                             | 3.03 | In the taxon's introduced range, are there known adverse impacts to aquaculture?                                                                                        | Yes            | No data                                                                                                                                                                                                                                    | Medium     |
| 12                                             | 3.04 | In the taxon's introduced range, are there known adverse impacts to ecosystem                                                                                           | No             | No data                                                                                                                                                                                                                                    | Low        |
| 13                                             | 3.05 | In the taxon's introduced range, are there known adverse socio-economic impacts?                                                                                        | Not applicable | No data                                                                                                                                                                                                                                    | Low        |
| B. Biology/Ecology                             |      |                                                                                                                                                                         |                |                                                                                                                                                                                                                                            |            |
| 4. Undesirable (or persistence) traits         |      |                                                                                                                                                                         |                |                                                                                                                                                                                                                                            |            |
| 14                                             | 4.01 | Is it likely that the taxon will be poisonous or pose other risks to human health?                                                                                      | No             | Such a fact is not known.                                                                                                                                                                                                                  | Very high  |
| 15                                             | 4.02 | Is it likely that the taxon will smother one or more native taxa (that are not threatened or protected)?                                                                | Yes            | There are some warnings with regard to the potential effect of R. lindbergi on the native fish fauna but still no published evidence exists about its negative impact (Japoshvili et al. 2020)                                             | High       |
| 16                                             | 4.03 | Are there any threatened or protected taxa that the non-native taxon would parasitise in the RA area?                                                                   | Yes            | There are many threatened and protected species in the SC region which are likely to be under the influence of R. lindbergi: e.g. Salmo spp; Acipenser spp; Luciobarbus capito, etc. (Kuljanishvili et al. 2020; Epitashvili et al. 2020). | Very high  |
| 17                                             | 4.04 | Is the taxon adaptable in terms of climatic and other environmental conditions, thus enhancing its potential persistence if it has invaded or could invade the RA area? | Yes            | It seems that this species has a high ability to adapt new environmental conditions because it has been successfully established in the Caucasus region.                                                                                   | Medium     |
| 18                                             | 4.05 | Is the taxon likely to disrupt food-web structure/function in aquatic ecosystems if it has invaded or is likely to invade the RA                                        | Yes            | Still no published evidence exists about its negative impact on the food web structure in ecosystems                                                                                                                                       | Medium     |
| 19                                             | 4.06 | Is the taxon likely to exert adverse impacts on ecosystem services in the RA area?                                                                                      | Yes            | No research has been conducted in this direction.                                                                                                                                                                                          | Low        |
| 20                                             | 4.07 | Is it likely that the taxon will host, and/or act as a vector for, recognised pests and infectious agents that are endemic in the RA                                    | No             | No data                                                                                                                                                                                                                                    | Low        |
| 21                                             | 4.08 | Is it likely that the taxon will host, and/or act as a vector for, recognised pests and infectious agents that are absent from (novel to) the RA area?                  | No             | No data                                                                                                                                                                                                                                    | Low        |
| 22                                             | 4.09 | Is it likely that the taxon will achieve a body size that will make it more likely to be released from captivity?                                                       | No             | R. lindbergi is small sized fish. Economic value of this species is not evaluated.                                                                                                                                                         | High       |
| 23                                             | 4.10 | Is the taxon capable of sustaining itself in a range of water velocity conditions (e.g. versatile in habitat use)?                                                      | Yes            | R. lindbergi is distributed in rivers and lakes of the Caucasus region and can live in both standing and flowing waters.                                                                                                                   | High       |

|                                 |      |                                                                                                                                                                              |                |                                                                                                                                                                                                                                   |           |
|---------------------------------|------|------------------------------------------------------------------------------------------------------------------------------------------------------------------------------|----------------|-----------------------------------------------------------------------------------------------------------------------------------------------------------------------------------------------------------------------------------|-----------|
| 24                              | 4.11 | Is it likely that the taxon's mode of existence (e.g. excretion of by-products) or behaviours (e.g. feeding) will reduce habitat quality for native taxa?                    | Yes            | R. lindbergi should be considered as new invasive species for the Caucasus region and adverse negative impacts on the local habitats and ecosystems are expected.                                                                 | Medium    |
| 25                              | 4.12 | Is the taxon likely to maintain a viable population even when present in low densities (or persisting in adverse conditions by way of a dormant form)?                       | Yes            | No research has been conducted in this direction.                                                                                                                                                                                 | Medium    |
| <b>5. Resource exploitation</b> |      |                                                                                                                                                                              |                |                                                                                                                                                                                                                                   |           |
| 26                              | 5.01 | Is the taxon likely to consume threatened or protected native taxa in the RA area?                                                                                           | Yes            | Such data is not available right now                                                                                                                                                                                              | Low       |
| 27                              | 5.02 | Is the taxon likely to sequester food resources (including nutrients) to the detriment of native taxa in the RA area?                                                        | Not applicable | No research has been conducted in this direction.                                                                                                                                                                                 | Low       |
| <b>6. Reproduction</b>          |      |                                                                                                                                                                              |                |                                                                                                                                                                                                                                   |           |
| 28                              | 6.01 | Is the taxon likely to exhibit parental care and/or to reduce age-at-maturity in response to environmental conditions?                                                       | Not applicable | No research has been conducted in this direction.                                                                                                                                                                                 | Low       |
| 29                              | 6.02 | Is the taxon likely to produce viable gametes or propagules (in the RA area)?                                                                                                | Not applicable | Most likely this species is breeding in the region but currently we have no evidence.                                                                                                                                             | Low       |
| 30                              | 6.03 | Is the taxon likely to hybridise naturally with native taxa?                                                                                                                 | No             | No such fact has been detected                                                                                                                                                                                                    | Medium    |
| 31                              | 6.04 | Is the taxon likely to be hermaphroditic or to display asexual reproduction?                                                                                                 | No             | No research has been conducted in this direction.                                                                                                                                                                                 | Low       |
| 32                              | 6.05 | Is the taxon dependent on the presence of another taxon (or specific habitat features) to complete its life cycle?                                                           | No             | Such a fact is not known.                                                                                                                                                                                                         | Medium    |
| 33                              | 6.06 | Is the taxon known (or likely) to produce a large number of propagules or offspring within a short time span (e.g. < 1 year)?                                                | No             | No data                                                                                                                                                                                                                           | Low       |
| 34                              | 6.07 | How many time units (days, months, years) does the taxon require to reach the age-at-first-reproduction?                                                                     | 1              | No data                                                                                                                                                                                                                           | Medium    |
| <b>7. Dispersal mechanisms</b>  |      |                                                                                                                                                                              |                |                                                                                                                                                                                                                                   |           |
| 35                              | 7.01 | How many potential internal vectors/pathways could the taxon use to disperse within the RA area (with suitable)                                                              | One            | Unintentional distribution by humans                                                                                                                                                                                              | High      |
| 36                              | 7.02 | Will any of these vectors/pathways bring the taxon in close proximity to one or more protected areas (e.g. MCZ, MPA, SSSI)?                                                  | Yes            | This species found in the Chachuna Managed Reserve, eastern Georgia (Own unpublished data).                                                                                                                                       | Medium    |
| 37                              | 7.03 | Does the taxon have a means of actively attaching itself to hard substrata (e.g. ship hulls, pilings, buoys) such that it enhances the likelihood of dispersal?              | No             | No data                                                                                                                                                                                                                           | Medium    |
| 38                              | 7.04 | Is natural dispersal of the taxon likely to occur as eggs (for animals) or as propagules (for plants: seeds, spores) in the RA area?                                         | No             | The eggs of this species may be spread by animals but there is no evidence.                                                                                                                                                       | Low       |
| 39                              | 7.05 | Is natural dispersal of the taxon likely to occur as larvae/juveniles (for animals) or as fragments/seedlings (for plants) in the RA area?                                   | No             | No such data available                                                                                                                                                                                                            | Low       |
| 40                              | 7.06 | Are older life stages of the taxon likely to migrate in the RA area for reproduction?                                                                                        | No             | This species is small sized and does not migrate in the long distances.                                                                                                                                                           | Very high |
| 41                              | 7.07 | Are propagules or eggs of the taxon likely to be dispersed in the RA area by other animals?                                                                                  | No             | No such data available for this time                                                                                                                                                                                              | Low       |
| 42                              | 7.08 | Is dispersal of the taxon along any of the vectors/pathways mentioned in the previous seven questions (35–41; i.e. both unintentional or intentional) likely to be           | Yes            | Own observation                                                                                                                                                                                                                   | Low       |
| 43                              | 7.09 | Is dispersal of the taxon density dependent?                                                                                                                                 | Yes            | No data                                                                                                                                                                                                                           | Low       |
| <b>8. Tolerance attributes</b>  |      |                                                                                                                                                                              |                |                                                                                                                                                                                                                                   |           |
| 44                              | 8.01 | Is the taxon able to withstand being out of water for extended periods (e.g. minimum of one or more hours) at some stage of its life cycle?                                  | No             | Such a fact is not known.                                                                                                                                                                                                         | Medium    |
| 45                              | 8.02 | Is the taxon tolerant of a wide range of water quality conditions relevant to that taxon? [In the Justification field, indicate the relevant water quality variable(s) being | No             | Data deficient                                                                                                                                                                                                                    | Low       |
| 46                              | 8.03 | Can the taxon be controlled or eradicated in the wild with chemical, biological, or other agents/means?                                                                      | Yes            | Data deficient                                                                                                                                                                                                                    | Low       |
| 47                              | 8.04 | Is the taxon likely to tolerate or benefit from environmental/human disturbance?                                                                                             | Yes            | Data deficient                                                                                                                                                                                                                    | Low       |
| 48                              | 8.05 | Is the taxon able to tolerate salinity levels that are higher or lower than those found in its usual environment?                                                            | No             | This fish is a typical freshwater species                                                                                                                                                                                         | Medium    |
| 49                              | 8.06 | Are there effective natural enemies (predators) of the taxon present in the RA area?                                                                                         | Yes            | There are several taxas which should be considered as natural predators for R. lindbergi. This taxons are birds (kingfisher, herons, gulls, etc.), fish (Squalius spp; Perca fluviatilis, Silurus glanis, etc.) reptiles and etc. | High      |
| <b>C. Climate change</b>        |      |                                                                                                                                                                              |                |                                                                                                                                                                                                                                   |           |
| <b>9. Climate change</b>        |      |                                                                                                                                                                              |                |                                                                                                                                                                                                                                   |           |

|    |      |                                                                                                                                                              |           |                                                                                                                                                                                                                                                      |        |
|----|------|--------------------------------------------------------------------------------------------------------------------------------------------------------------|-----------|------------------------------------------------------------------------------------------------------------------------------------------------------------------------------------------------------------------------------------------------------|--------|
| 50 | 9.01 | Under the predicted future climatic conditions, are the risks of entry into the RA area posed by the taxon likely to increase, decrease or not change?       | Increase  | The Rhinogobius species, considered invasive in the Caspian Sea basin, seems to be now widespread also in the Caspian part of the study area (Japoshvili et al., 2020) and is expected to enter the Black Sea basin soon (Kuljanishvili et al. 2020) | High   |
| 51 | 9.02 | Under the predicted future climatic conditions, are the risks of establishment posed by the taxon likely to increase, decrease or not change?                | Increase  | The Rhinogobius species, considered invasive in the Caspian Sea basin, seems to be now widespread also in the Caspian part of the study area (Japoshvili et al., 2020) and is expected to enter the Black Sea basin soon (Kuljanishvili et al. 2020) | High   |
| 52 | 9.03 | Under the predicted future climatic conditions, are the risks of dispersal within the RA area posed by the taxon likely to increase, decrease or not change? | Increase  | The Rhinogobius species, considered invasive in the Caspian Sea basin, seems to be now widespread also in the Caspian part of the study area (Japoshvili et al., 2020) and is expected to enter the Black Sea basin soon (Kuljanishvili et al. 2020) | High   |
| 53 | 9.04 | Under the predicted future climatic conditions, what is the likely magnitude of future potential impacts on biodiversity and/or ecological integrity/status? | Higher    | Own observation                                                                                                                                                                                                                                      | Medium |
| 54 | 9.05 | Under the predicted future climatic conditions, what is the likely magnitude of future potential impacts on ecosystem structure and/or function?             | Higher    | Own observation                                                                                                                                                                                                                                      | Medium |
| 55 | 9.06 | Under the predicted future climatic conditions, what is the likely magnitude of future potential impacts on ecosystem services/socio-economic factors?       | No change | Own observation                                                                                                                                                                                                                                      | Medium |

| Statistics                                     |             |
|------------------------------------------------|-------------|
| Scores                                         |             |
| <b>BRA</b>                                     | <b>17.5</b> |
| <b>BRA Outcome</b>                             | <b>-</b>    |
| <b>BRA+CCA</b>                                 | <b>27.5</b> |
| <b>BRA+CCA Outcome</b>                         | <b>-</b>    |
| Score partition                                |             |
| <b>A. Biogeography/Historical</b>              | <b>8.5</b>  |
| 1. Domestication/Cultivation                   | 0.0         |
| 2. Climate, distribution and introduction risk | 1.0         |
| 3. Invasive elsewhere                          | 7.5         |
| <b>B. Biology/Ecology</b>                      | <b>9.0</b>  |
| 4. Undesirable (or persistence) traits         | 8.0         |
| 5. Resource exploitation                       | 5.0         |
| 6. Reproduction                                | 0.0         |
| 7. Dispersal mechanisms                        | -2.0        |
| 8. Tolerance attributes                        | -2.0        |
| <b>C. Climate change</b>                       | <b>10.0</b> |
| 9. Climate change                              | 10.0        |
| Answered Questions                             |             |
| <b>Total</b>                                   | <b>55</b>   |
| <b>A. Biogeography/Historical</b>              | <b>13</b>   |
| 1. Domestication/Cultivation                   | 3           |
| 2. Climate, distribution and introduction risk | 5           |
| 3. Invasive elsewhere                          | 5           |
| <b>B. Biology/Ecology</b>                      | <b>36</b>   |
| 4. Undesirable (or persistence) traits         | 12          |
| 5. Resource exploitation                       | 2           |
| 6. Reproduction                                | 7           |
| 7. Dispersal mechanisms                        | 9           |
| 8. Tolerance attributes                        | 6           |
| <b>C. Climate change</b>                       | <b>6</b>    |
| 9. Climate change                              | 6           |
| Sectors affected                               |             |
| <b>Commercial</b>                              | <b>7</b>    |
| <b>Environmental</b>                           | <b>13</b>   |
| <b>Species or population nuisance traits</b>   | <b>11</b>   |

| Thresholds     |             |
|----------------|-------------|
| <b>BRA</b>     | <b>-</b>    |
| <b>BRA+CCA</b> | <b>-</b>    |
| Confidence     |             |
| <b>BRA+CCA</b> | <b>0.52</b> |
| <b>BRA</b>     | <b>0.51</b> |
| <b>CCA</b>     | <b>0.63</b> |

| Date and Time       |  |
|---------------------|--|
| 13/05/2022 17:59:37 |  |

AS-ISK v2

| Taxon and Assessor details         |                                                                                                                                     |
|------------------------------------|-------------------------------------------------------------------------------------------------------------------------------------|
| Category                           | Fishes and Lampreys (freshwater)                                                                                                    |
| Taxon name                         | <i>Rhinogobius lindbergi</i>                                                                                                        |
| Common name                        | Lin's goby                                                                                                                          |
| Assessor                           | Tatia Kuljanishvili                                                                                                                 |
| Risk screening context             |                                                                                                                                     |
| Reason and socio-economic benefits | Most probably accidentally introduced through aquaculture                                                                           |
| Risk assessment area               | South Caucasus                                                                                                                      |
| Taxonomy                           | Actinopteri (ray-finned fishes) > Gobiiformes (Gobies) > Oxudercidae                                                                |
| Native range                       | The Amur River drainage                                                                                                             |
| Introduced range                   | The Caspian Sea basin                                                                                                               |
| URL                                | <a href="https://fishbase.mhn.fr/summary/Rhinogobius-lindbergi.html">https://fishbase.mhn.fr/summary/Rhinogobius-lindbergi.html</a> |

|                                                |      | Response                                                                                                                                                                | Justification (references and/or other information) | Confidence                                                                                                                                                                              |           |
|------------------------------------------------|------|-------------------------------------------------------------------------------------------------------------------------------------------------------------------------|-----------------------------------------------------|-----------------------------------------------------------------------------------------------------------------------------------------------------------------------------------------|-----------|
| A. Biogeography/Historical                     |      |                                                                                                                                                                         |                                                     |                                                                                                                                                                                         |           |
| 1. Domestication/Cultivation                   |      |                                                                                                                                                                         |                                                     |                                                                                                                                                                                         |           |
| 1                                              | 1.01 | Has the taxon been the subject of domestication (or cultivation) for at least 20 generations?                                                                           | No                                                  | No trade value                                                                                                                                                                          | Very high |
| 2                                              | 1.02 | Is the taxon harvested in the wild and likely to be sold or used in its live form?                                                                                      | No                                                  | It is not harvested or sold                                                                                                                                                             | Very high |
| 3                                              | 1.03 | Does the taxon have invasive races, varieties, sub-taxa or congeners?                                                                                                   | Yes                                                 | Rhinogobius giurinus and R. cliffordpopei (Actinopterygii, Gobiidae) in a plateau lake, southwestern China, However there is not assessment done if they are invasive (Guo et al 2016). | Medium    |
| 2. Climate, distribution and introduction risk |      |                                                                                                                                                                         |                                                     |                                                                                                                                                                                         |           |
| 4                                              | 2.01 | How similar are the climatic conditions of the Risk Assessment (RA) area and the taxon's native range?                                                                  | High                                                | Somehow similar                                                                                                                                                                         | Medium    |
| 5                                              | 2.02 | What is the quality of the climate matching data?                                                                                                                       | Medium                                              | There are no climatic stations in climatch to make this analysis. However, according to Koppen-Geiger map the climate is somehow similar.                                               | Medium    |
| 6                                              | 2.03 | Is the taxon already present outside of captivity in the RA area?                                                                                                       | Yes                                                 | today the species is distributed only in the eastern part of Georgia and Azerbaijan                                                                                                     | Very high |
| 7                                              | 2.04 | How many potential vectors could the taxon use to enter in the RA area?                                                                                                 | > 1                                                 | Aquaculture; Natural dispersal                                                                                                                                                          | Very high |
| 8                                              | 2.05 | Is the taxon currently found in close proximity to, and likely to enter into, the RA area in the near future (e.g. unintentional and intentional introductions)?        | Yes                                                 | today the species is distributed only in the eastern part of Georgia and Azerbaijan                                                                                                     | Very high |
| 3. Invasive elsewhere                          |      |                                                                                                                                                                         |                                                     |                                                                                                                                                                                         |           |
| 9                                              | 3.01 | Has the taxon become naturalised (established viable populations) outside its introduced range?                                                                         | Yes                                                 | Yes it has become naturalized outside its native area                                                                                                                                   | Very high |
| 10                                             | 3.02 | In the taxon's introduced range, are there known adverse impacts to wild stocks or commercial taxa?                                                                     | No                                                  | Not known                                                                                                                                                                               | Low       |
| 11                                             | 3.03 | In the taxon's introduced range, are there known adverse impacts to aquaculture?                                                                                        | No                                                  | Not known                                                                                                                                                                               | Low       |
| 12                                             | 3.04 | In the taxon's introduced range, are there known adverse impacts to ecosystem                                                                                           | No                                                  | Not known                                                                                                                                                                               | Low       |
| 13                                             | 3.05 | In the taxon's introduced range, are there known adverse socio-economic impacts?                                                                                        | No                                                  | Not known                                                                                                                                                                               | Low       |
| B. Biology/Ecology                             |      |                                                                                                                                                                         |                                                     |                                                                                                                                                                                         |           |
| 4. Undesirable (or persistence) traits         |      |                                                                                                                                                                         |                                                     |                                                                                                                                                                                         |           |
| 14                                             | 4.01 | Is it likely that the taxon will be poisonous or pose other risks to human health?                                                                                      | No                                                  | Not poisonous                                                                                                                                                                           | Very high |
| 15                                             | 4.02 | Is it likely that the taxon will smother one or more native taxa (that are not threatened or protected)?                                                                | No                                                  | No information availableNo information available                                                                                                                                        | Medium    |
| 16                                             | 4.03 | Are there any threatened or protected taxa that the non-native taxon would parasitise in the RA area?                                                                   | No                                                  | No. does not parasite                                                                                                                                                                   | Very high |
| 17                                             | 4.04 | Is the taxon adaptable in terms of climatic and other environmental conditions, thus enhancing its potential persistence if it has invaded or could invade the RA area? | Yes                                                 | It is not known                                                                                                                                                                         | Low       |
| 18                                             | 4.05 | Is the taxon likely to disrupt food-web structure/function in aquatic ecosystems if it has invaded or is likely to invade the RA                                        | No                                                  | Less likely                                                                                                                                                                             | Low       |
| 19                                             | 4.06 | Is the taxon likely to exert adverse impacts on ecosystem services in the RA area?                                                                                      | No                                                  | No adverse impacts on ecosystem services in the RA area is known                                                                                                                        | Low       |
| 20                                             | 4.07 | Is it likely that the taxon will host, and/or act as a vector for, recognised pests and infectious agents that are endemic in the RA                                    | No                                                  | Noinformation available                                                                                                                                                                 | Low       |
| 21                                             | 4.08 | Is it likely that the taxon will host, and/or act as a vector for, recognised pests and infectious agents that are absent from (novel to) the RA area?                  | Yes                                                 | No information available                                                                                                                                                                | Low       |
| 22                                             | 4.09 | Is it likely that the taxon will achieve a body size that will make it more likely to be released from captivity?                                                       | No                                                  | Does not achive big sizes                                                                                                                                                               | High      |
| 23                                             | 4.10 | Is the taxon capable of sustaining itself in a range of water velocity conditions (e.g. versatile in habitat use)?                                                      | No                                                  | No information available                                                                                                                                                                | Medium    |

|                                 |      |                                                                                                                                                                              |          |                                                                                                                                                                                                                                                      |           |
|---------------------------------|------|------------------------------------------------------------------------------------------------------------------------------------------------------------------------------|----------|------------------------------------------------------------------------------------------------------------------------------------------------------------------------------------------------------------------------------------------------------|-----------|
| 24                              | 4.11 | Is it likely that the taxon's mode of existence (e.g. excretion of by-products) or behaviours (e.g. feeding) will reduce habitat quality for native taxa?                    | No       | No information available                                                                                                                                                                                                                             | Medium    |
| 25                              | 4.12 | Is the taxon likely to maintain a viable population even when present in low densities (or persisting in adverse conditions by way of a dormant form)?                       | Yes      | Yes. as it has already established in RA after 'accidental' introduction                                                                                                                                                                             | High      |
| <b>5. Resource exploitation</b> |      |                                                                                                                                                                              |          |                                                                                                                                                                                                                                                      |           |
| 26                              | 5.01 | Is the taxon likely to consume threatened or protected native taxa in the RA area?                                                                                           | Yes      | Can prey on native fish larvae                                                                                                                                                                                                                       | High      |
| 27                              | 5.02 | Is the taxon likely to sequester food resources (including nutrients) to the detriment of native taxa in the RA area?                                                        | No       | No                                                                                                                                                                                                                                                   | Medium    |
| <b>6. Reproduction</b>          |      |                                                                                                                                                                              |          |                                                                                                                                                                                                                                                      |           |
| 28                              | 6.01 | Is the taxon likely to exhibit parental care and/or to reduce age-at-maturity in response to environmental conditions?                                                       | Yes      | in introduced environment they can change their reproductive biology Guo et al 2013                                                                                                                                                                  | Medium    |
| 29                              | 6.02 | Is the taxon likely to produce viable gametes or propagules (in the RA area)?                                                                                                | Yes      | Yes Climate is quite similar.                                                                                                                                                                                                                        | High      |
| 30                              | 6.03 | Is the taxon likely to hybridise naturally with native taxa?                                                                                                                 | No       | No information available                                                                                                                                                                                                                             | Low       |
| 31                              | 6.04 | Is the taxon likely to be hermaphroditic or to display asexual reproduction?                                                                                                 | No       | No. Does not display asexual reproduction                                                                                                                                                                                                            | High      |
| 32                              | 6.05 | Is the taxon dependent on the presence of another taxon (or specific habitat features) to complete its life cycle?                                                           | No       | No. See: <a href="https://fishbase.mnhn.fr/summary/Rhinogobius-lindbergi.html">https://fishbase.mnhn.fr/summary/Rhinogobius-lindbergi.html</a>                                                                                                       | Very high |
| 33                              | 6.06 | Is the taxon known (or likely) to produce a large number of propagules or offspring within a short time span (e.g. < 1 year)?                                                | No       | No information available                                                                                                                                                                                                                             | Low       |
| 34                              | 6.07 | How many time units (days, months, years) does the taxon require to reach the age-at-first-reproduction?                                                                     | 1        | 1                                                                                                                                                                                                                                                    | Very high |
| <b>7. Dispersal mechanisms</b>  |      |                                                                                                                                                                              |          |                                                                                                                                                                                                                                                      |           |
| 35                              | 7.01 | How many potential internal vectors/pathways could the taxon use to disperse within the RA area (with suitable)                                                              | >1       | Aquaculture; natural spread                                                                                                                                                                                                                          | Very high |
| 36                              | 7.02 | Will any of these vectors/pathways bring the taxon in close proximity to one or more protected areas (e.g. MCZ, MPA, SSSI)?                                                  | Yes      | It is possible                                                                                                                                                                                                                                       | High      |
| 37                              | 7.03 | Does the taxon have a means of actively attaching itself to hard substrata (e.g. ship hulls, pilings, buoys) such that it enhances the likelihood of dispersal?              | Yes      | No. Morphologically this species does not have a means of actively attaching itself to hard substrata                                                                                                                                                | Very high |
| 38                              | 7.04 | Is natural dispersal of the taxon likely to occur as eggs (for animals) or as propagules (for plants: seeds, spores) in the RA area?                                         | Yes      | Yes. it is possible                                                                                                                                                                                                                                  | High      |
| 39                              | 7.05 | Is natural dispersal of the taxon likely to occur as larvae/juveniles (for animals) or as fragments/seedlings (for plants) in the RA area?                                   | Yes      | Yes. it is possible                                                                                                                                                                                                                                  | High      |
| 40                              | 7.06 | Are older life stages of the taxon likely to migrate in the RA area for reproduction?                                                                                        | No       | Does not migrate                                                                                                                                                                                                                                     | High      |
| 41                              | 7.07 | Are propagules or eggs of the taxon likely to be dispersed in the RA area by other animals?                                                                                  | No       | No. Can not be dispersed by other animals                                                                                                                                                                                                            | High      |
| 42                              | 7.08 | Is dispersal of the taxon along any of the vectors/pathways mentioned in the previous seven questions (35-41; i.e. both unintentional or intentional) likely to be           | Yes      | Yes they seem to be rapid                                                                                                                                                                                                                            | Medium    |
| 43                              | 7.09 | Is dispersal of the taxon density dependent?                                                                                                                                 | No       | No information available                                                                                                                                                                                                                             | High      |
| <b>8. Tolerance attributes</b>  |      |                                                                                                                                                                              |          |                                                                                                                                                                                                                                                      |           |
| 44                              | 8.01 | Is the taxon able to withstand being out of water for extended periods (e.g. minimum of one or more hours) at some stage of its life cycle?                                  | No       | No                                                                                                                                                                                                                                                   | Low       |
| 45                              | 8.02 | Is the taxon tolerant of a wide range of water quality conditions relevant to that taxon? [In the Justification field, indicate the relevant water quality variable(s) being | No       | No info                                                                                                                                                                                                                                              | Low       |
| 46                              | 8.03 | Can the taxon be controlled or eradicated in the wild with chemical, biological, or other agents/means?                                                                      | No       | No. This is less likely.                                                                                                                                                                                                                             | High      |
| 47                              | 8.04 | Is the taxon likely to tolerate or benefit from environmental/human disturbance?                                                                                             | No       | No information available                                                                                                                                                                                                                             | Medium    |
| 48                              | 8.05 | Is the taxon able to tolerate salinity levels that are higher or lower than those found in its usual environment?                                                            | No       | No info                                                                                                                                                                                                                                              | Low       |
| 49                              | 8.06 | Are there effective natural enemies (predators) of the taxon present in the RA                                                                                               | No       | No effective natural enemies present in RA area                                                                                                                                                                                                      | Low       |
| <b>C. Climate change</b>        |      |                                                                                                                                                                              |          |                                                                                                                                                                                                                                                      |           |
| <b>9. Climate change</b>        |      |                                                                                                                                                                              |          |                                                                                                                                                                                                                                                      |           |
| 50                              | 9.01 | Under the predicted future climatic conditions, are the risks of entry into the RA area posed by the taxon likely to increase, decrease or not change?                       | Increase | It was hypothesised that climate change might alert the mechanisms of transportation and introduction of non-native species. Commercial and recreational activities will increase, that itself increases the propagule pressure levels of non-native | Very high |



|    |      |                                                                                                                                                              |          |                                                                                                                                                                                         |           |
|----|------|--------------------------------------------------------------------------------------------------------------------------------------------------------------|----------|-----------------------------------------------------------------------------------------------------------------------------------------------------------------------------------------|-----------|
| 51 | 9.02 | Under the predicted future climatic conditions, are the risks of establishment posed by the taxon likely to increase, decrease or not change?                | Increase | Since this species is originally from the Amur River drainage, where the temperatures are higher than in RA under the predicted climatic conditions risk of establishment will increase | Very high |
| 52 | 9.03 | Under the predicted future climatic conditions, are the risks of dispersal within the RA area posed by the taxon likely to increase, decrease or not change? | Increase | It will distribute more widely                                                                                                                                                          | Very high |
| 53 | 9.04 | Under the predicted future climatic conditions, what is the likely magnitude of future potential impacts on biodiversity and/or ecological integrity/status? | Higher   | Since their number will increase it will increase potential impact on biodiversity                                                                                                      | Very high |
| 54 | 9.05 | Under the predicted future climatic conditions, what is the likely magnitude of future potential impacts on ecosystem structure and/or function?             | Higher   | Higher                                                                                                                                                                                  | Very high |
| 55 | 9.06 | Under the predicted future climatic conditions, what is the likely magnitude of future potential impacts on ecosystem services/socio-economic factors?       | Higher   | Higher                                                                                                                                                                                  | Very high |

| Statistics                                     |             |
|------------------------------------------------|-------------|
| Scores                                         |             |
| <b>BRA</b>                                     | <b>16.0</b> |
| <b>BRA Outcome</b>                             | -           |
| <b>BRA+CCA</b>                                 | <b>28.0</b> |
| <b>BRA+CCA Outcome</b>                         | -           |
| Score partition                                |             |
| <b>A. Biogeography/Historical</b>              | <b>4.0</b>  |
| 1. Domestication/Cultivation                   | 0.0         |
| 2. Climate, distribution and introduction risk | 2.0         |
| 3. Invasive elsewhere                          | 2.0         |
| <b>B. Biology/Ecology</b>                      | <b>12.0</b> |
| 4. Undesirable (or persistence) traits         | 3.0         |
| 5. Resource exploitation                       | 5.0         |
| 6. Reproduction                                | 2.0         |
| 7. Dispersal mechanisms                        | 4.0         |
| 8. Tolerance attributes                        | -2.0        |
| <b>C. Climate change</b>                       | <b>12.0</b> |
| 9. Climate change                              | 12.0        |
| Answered Questions                             |             |
| <b>Total</b>                                   | <b>55</b>   |
| <b>A. Biogeography/Historical</b>              | <b>13</b>   |
| 1. Domestication/Cultivation                   | 3           |
| 2. Climate, distribution and introduction risk | 5           |
| 3. Invasive elsewhere                          | 5           |
| <b>B. Biology/Ecology</b>                      | <b>36</b>   |
| 4. Undesirable (or persistence) traits         | 12          |
| 5. Resource exploitation                       | 2           |
| 6. Reproduction                                | 7           |
| 7. Dispersal mechanisms                        | 9           |
| 8. Tolerance attributes                        | 6           |
| <b>C. Climate change</b>                       | <b>6</b>    |
| 9. Climate change                              | 6           |
| Sectors affected                               |             |
| <b>Commercial</b>                              | <b>5</b>    |
| <b>Environmental</b>                           | <b>10</b>   |
| <b>Species or population nuisance traits</b>   | <b>18</b>   |

| Thresholds     |             |
|----------------|-------------|
| <b>BRA</b>     | -           |
| <b>BRA+CCA</b> | -           |
| Confidence     |             |
| <b>BRA+CCA</b> | <b>0.65</b> |
| <b>BRA</b>     | <b>0.61</b> |
| <b>CCA</b>     | <b>1.00</b> |

| Date and Time       |  |
|---------------------|--|
| 22/05/2022 15:41:17 |  |

## AS-ISK v2

| Taxon and Assessor details         |                                                                                                                       |
|------------------------------------|-----------------------------------------------------------------------------------------------------------------------|
| Category                           | Fishes and Lampreys (freshwater)                                                                                      |
| Taxon name                         | <i>Salmo ischchan</i>                                                                                                 |
| Common name                        | Sevan trout                                                                                                           |
| Assessor                           | Bella Japoshvili                                                                                                      |
| Risk screening context             |                                                                                                                       |
| Reason and socio-economic benefits | The species is endemic to Sevan lake in Armenia. However it was introduced to several                                 |
| Risk assessment area               | South Caucasus                                                                                                        |
| Taxonomy                           | Actinopteri (ray-finned fishes) > Salmoniformes (Salmons) > Salmonidae (Salmonids)                                    |
| Native range                       | Sevan Lake                                                                                                            |
| Introduced range                   | South Caucasus                                                                                                        |
| URL                                | <a href="https://www.fishbase.de/summary/Salmo-ischchan.html">https://www.fishbase.de/summary/Salmo-ischchan.html</a> |

|                                                |      |                                                                                                                                                                         | Response | Justification (references and/or other information)                                                                                                                                                                                                                                                                                                                                                                                                                                                                                                        | Confidence |
|------------------------------------------------|------|-------------------------------------------------------------------------------------------------------------------------------------------------------------------------|----------|------------------------------------------------------------------------------------------------------------------------------------------------------------------------------------------------------------------------------------------------------------------------------------------------------------------------------------------------------------------------------------------------------------------------------------------------------------------------------------------------------------------------------------------------------------|------------|
| A. Biogeography/Historical                     |      |                                                                                                                                                                         |          |                                                                                                                                                                                                                                                                                                                                                                                                                                                                                                                                                            |            |
| 1. Domestication/Cultivation                   |      |                                                                                                                                                                         |          |                                                                                                                                                                                                                                                                                                                                                                                                                                                                                                                                                            |            |
| 1                                              | 1.01 | Has the taxon been the subject of domestication (or cultivation) for at least 20 generations?                                                                           | Yes      | Musayev MA, Quliyev ZM, Rehimov DB, et al. 2004. Vertebrates, volume III. In: Musayev MA, ed. The AnimalWorld ofAzerbaijan: Elm (in Azeri) Baku. 3–316.; Elanidze R. 1983. Ichthyofauna of the rivers and lakes of Georgia, Metsniereba (in Russian) Tbilisi,                                                                                                                                                                                                                                                                                              | Very high  |
| 2                                              | 1.02 | Is the taxon harvested in the wild and likely to be sold or used in its live form?                                                                                      | Yes      | Supposed though not a recent documented evidence                                                                                                                                                                                                                                                                                                                                                                                                                                                                                                           | Low        |
| 3                                              | 1.03 | Does the taxon have invasive races, varieties, sub-taxa or congeners?                                                                                                   | Yes      | Congeneric S. trutta                                                                                                                                                                                                                                                                                                                                                                                                                                                                                                                                       | High       |
| 2. Climate, distribution and introduction risk |      |                                                                                                                                                                         |          |                                                                                                                                                                                                                                                                                                                                                                                                                                                                                                                                                            |            |
| 4                                              | 2.01 | How similar are the climatic conditions of the Risk Assessment (RA) area and the taxon's native range?                                                                  | Low      | Results of climatch algorithm                                                                                                                                                                                                                                                                                                                                                                                                                                                                                                                              | Low        |
| 5                                              | 2.02 | What is the quality of the climate matching data?                                                                                                                       | Low      | Due to low accuracy of local climate data                                                                                                                                                                                                                                                                                                                                                                                                                                                                                                                  | High       |
| 6                                              | 2.03 | Is the taxon already present outside of captivity in the RA area?                                                                                                       | Yes      | Kuljanishvili, T., Mumladze, L., Japoshvili, B., Mustafayev, N., Ibrahimov, S., Patoka, J., ... & Kalous, L. (2021). The first unified inventory of non-native fishes of the South Caucasian countries, Armenia, Azerbaijan, and Georgia. Knowledge & Management of Aquatic Ecosystems, (422), 32.                                                                                                                                                                                                                                                         | Very high  |
| 7                                              | 2.04 | How many potential vectors could the taxon use to enter in the RA area?                                                                                                 | One      | Human mediated dispersal for aquacultural purpose                                                                                                                                                                                                                                                                                                                                                                                                                                                                                                          | High       |
| 8                                              | 2.05 | Is the taxon currently found in close proximity to, and likely to enter into, the RA area in the near future (e.g. unintentional and intentional introductions)?        | Yes      | Kuljanishvili, T., Mumladze, L., Japoshvili, B., Mustafayev, N., Ibrahimov, S., Patoka, J., ... & Kalous, L. (2021). The first unified inventory of non-native fishes of the South Caucasian countries, Armenia, Azerbaijan, and Georgia. Knowledge & Management of Aquatic Ecosystems, (422), 32.                                                                                                                                                                                                                                                         | High       |
| 3. Invasive elsewhere                          |      |                                                                                                                                                                         |          |                                                                                                                                                                                                                                                                                                                                                                                                                                                                                                                                                            |            |
| 9                                              | 3.01 | Has the taxon become naturalised (established viable populations) outside its native range?                                                                             | Yes      | Kuljanishvili, T., Mumladze, L., Japoshvili, B., Mustafayev, N., Ibrahimov, S., Patoka, J., ... & Kalous, L. (2021). The first unified inventory of non-native fishes of the South Caucasian countries, Armenia, Azerbaijan, and Georgia. Knowledge & Management of Aquatic Ecosystems, (422), 32; Bogdanowicz, W., Rutkowski, R., Gabrielyan, B. K., Ryspaev, A., Asatryan, A. N., Mkrtchyan, J. A., & Bujalska, B. M. (2017). Fish introductions in the former Soviet Union: The Sevan trout (Salmo ischchan)—80 years later. PloS one. 12(7). e0180605. | High       |
| 10                                             | 3.02 | In the taxon's introduced range, are there known adverse impacts to wild stocks or commercial taxa?                                                                     | No       | No relevan information exists                                                                                                                                                                                                                                                                                                                                                                                                                                                                                                                              | Medium     |
| 11                                             | 3.03 | In the taxon's introduced range, are there known adverse impacts to aquaculture?                                                                                        | No       | No documented evidence                                                                                                                                                                                                                                                                                                                                                                                                                                                                                                                                     | Medium     |
| 12                                             | 3.04 | In the taxon's introduced range, are there known adverse impacts to ecosystem                                                                                           | No       | No documented evidence                                                                                                                                                                                                                                                                                                                                                                                                                                                                                                                                     | Low        |
| 13                                             | 3.05 | In the taxon's introduced range, are there known adverse socio-economic impacts?                                                                                        | No       | No documented evidence                                                                                                                                                                                                                                                                                                                                                                                                                                                                                                                                     | Low        |
| B. Biology/Ecology                             |      |                                                                                                                                                                         |          |                                                                                                                                                                                                                                                                                                                                                                                                                                                                                                                                                            |            |
| 4. Undesirable (or persistence) traits         |      |                                                                                                                                                                         |          |                                                                                                                                                                                                                                                                                                                                                                                                                                                                                                                                                            |            |
| 14                                             | 4.01 | Is it likely that the taxon will be poisonous or pose other risks to human health?                                                                                      | No       | Not harmful speceis                                                                                                                                                                                                                                                                                                                                                                                                                                                                                                                                        | Very high  |
| 15                                             | 4.02 | Is it likely that the taxon will smother one or more native taxa (that are not threatened or protected)?                                                                | Yes      | Native salmonids                                                                                                                                                                                                                                                                                                                                                                                                                                                                                                                                           | Medium     |
| 16                                             | 4.03 | Are there any threatened or protected taxa that the non-native taxon would parasitise in the RA area?                                                                   | No       | Species is not parasite                                                                                                                                                                                                                                                                                                                                                                                                                                                                                                                                    | Very high  |
| 17                                             | 4.04 | Is the taxon adaptable in terms of climatic and other environmental conditions, thus enhancing its potential persistence if it has invaded or could invade the RA area? | No       | Not known                                                                                                                                                                                                                                                                                                                                                                                                                                                                                                                                                  | Low        |
| 18                                             | 4.05 | Is the taxon likely to disrupt food-web structure/function in aquatic ecosystems if it has invaded or is likely to invade the RA                                        | No       | No relevan information available                                                                                                                                                                                                                                                                                                                                                                                                                                                                                                                           | Low        |
| 19                                             | 4.06 | Is the taxon likely to exert adverse impacts on ecosystem services in the RA area?                                                                                      | No       | No relevant information                                                                                                                                                                                                                                                                                                                                                                                                                                                                                                                                    | Low        |
| 20                                             | 4.07 | Is it likely that the taxon will host, and/or act as a vector for, recognised pests and infectious agents that are endemic in the RA                                    | No       | No such pest/infectious agents are known                                                                                                                                                                                                                                                                                                                                                                                                                                                                                                                   | Low        |

|                                 |      |                                                                                                                                                                 |     |                                                                                                                                                                                                                                                                                                                                                                                                                                                                                                                                                                     |           |
|---------------------------------|------|-----------------------------------------------------------------------------------------------------------------------------------------------------------------|-----|---------------------------------------------------------------------------------------------------------------------------------------------------------------------------------------------------------------------------------------------------------------------------------------------------------------------------------------------------------------------------------------------------------------------------------------------------------------------------------------------------------------------------------------------------------------------|-----------|
| 21                              | 4.08 | Is it likely that the taxon will host, and/or act as a vector for, recognised pests and infectious agents that are absent from (novel to) the RA area?          | No  | Less likely because of the species is a local endemic within the RA area                                                                                                                                                                                                                                                                                                                                                                                                                                                                                            | Medium    |
| 22                              | 4.09 | Is it likely that the taxon will achieve a body size that will make it more likely to be released from captivity?                                               | Yes | It can grow as large as 1 m                                                                                                                                                                                                                                                                                                                                                                                                                                                                                                                                         | Low       |
| 23                              | 4.10 | Is the taxon capable of sustaining itself in a range of water velocity conditions (e.g. versatile in habitat use)?                                              | Yes | Species can cope with standing and flowing waters                                                                                                                                                                                                                                                                                                                                                                                                                                                                                                                   | High      |
| 24                              | 4.11 | Is it likely that the taxon's mode of existence (e.g. excretion of by-products) or behaviours (e.g. feeding) will reduce habitat quality for native taxa?       | No  | Not expected                                                                                                                                                                                                                                                                                                                                                                                                                                                                                                                                                        | Low       |
| 25                              | 4.12 | Is the taxon likely to maintain a viable population even when present in low densities (or persisting in adverse conditions by way of a dormant form)?          | No  | No such an evidence exists                                                                                                                                                                                                                                                                                                                                                                                                                                                                                                                                          | Medium    |
| <b>5. Resource exploitation</b> |      |                                                                                                                                                                 |     |                                                                                                                                                                                                                                                                                                                                                                                                                                                                                                                                                                     |           |
| 26                              | 5.01 | Is the taxon likely to consume threatened or protected native taxa in the RA area?                                                                              | Yes | Some invertebrate larvae (e.g. threatened dragonflies)                                                                                                                                                                                                                                                                                                                                                                                                                                                                                                              | Low       |
| 27                              | 5.02 | Is the taxon likely to sequester food resources (including nutrients) to the detriment of native taxa in the RA area?                                           | Yes | Only based on professional judgement, it is expected to consume the same food used by a native river salmon                                                                                                                                                                                                                                                                                                                                                                                                                                                         | Low       |
| <b>6. Reproduction</b>          |      |                                                                                                                                                                 |     |                                                                                                                                                                                                                                                                                                                                                                                                                                                                                                                                                                     |           |
| 28                              | 6.01 | Is the taxon likely to exhibit parental care and/or to reduce age-at-maturity in response to environmental conditions?                                          | Yes | Lavrovsky VV. On trout husbandry management in the U.S.S.R. First and Second Group Fellowship Study Tours on Inland Fisheries Research, Management and Fish Culture in the Union of Soviet Socialist Republics, 15 July–15 August 1965 and 31 May–2 July 1966, Lectures. Repository FAO/UNDP(TA) 2547. Rome: Food and Agriculture Organization of the United Nations; 1968. <a href="http://www.fao.org/docrep/005/77678e/77678E04.htm">http://www.fao.org/docrep/005/77678e/77678E04.htm</a> . Accessed 10 April 2016.                                             | High      |
| 29                              | 6.02 | Is the taxon likely to produce viable gametes or propagules (in the RA area)?                                                                                   | Yes | Kuljanishvili, T., Mumladze, L., Japoshvili, B., Mustafayev, N., Ibrahimov, S., Patoka, J., ... & Kalous, L. (2021). The first unified inventory of non-native fishes of the South Caucasian countries, Armenia, Azerbaijan, and Georgia. Knowledge & Management of Aquatic Ecosystems, (422), 32; Bogdanowicz, W., Rutkowski, R., Gabrielyan, B. K., Ryspaev, A., Asatryan, A. N., Mkrtchyan, J. A., & Bujalska, B. M. (2017). Fish introductions in the former Soviet Union: The Sevan trout ( <i>Salmo ischchan</i> )—80 years later. PloS one. 12(7). e0180605. | High      |
| 30                              | 6.03 | Is the taxon likely to hybridise naturally with native taxa?                                                                                                    | Yes | Not well documented                                                                                                                                                                                                                                                                                                                                                                                                                                                                                                                                                 | Low       |
| 31                              | 6.04 | Is the taxon likely to be hermaphroditic or to display asexual reproduction?                                                                                    | No  | No evidence of asexual reproduction                                                                                                                                                                                                                                                                                                                                                                                                                                                                                                                                 | Medium    |
| 32                              | 6.05 | Is the taxon dependent on the presence of another taxon (or specific habitat features) to complete its life cycle?                                              | No  | Completes its life cycle without any other species                                                                                                                                                                                                                                                                                                                                                                                                                                                                                                                  | Very high |
| 33                              | 6.06 | Is the taxon known (or likely) to produce a large number of propagules or offspring within a short time span (e.g. < 1 year)?                                   | No  | Several thousands only. Lavrovsky VV. On trout husbandry management in the U.S.S.R. First and Second Group Fellowship Study Tours on Inland Fisheries Research, Management and Fish Culture in the Union of Soviet Socialist Republics, 15 July–15 August 1965 and 31 May–2 July 1966, Lectures. Repository FAO/UNDP(TA) 2547. Rome: Food and Agriculture Organization of the United Nations; 1968. <a href="http://www.fao.org/docrep/005/77678e/77678E04.htm">http://www.fao.org/docrep/005/77678e/77678E04.htm</a> . Accessed years                              | High      |
| 34                              | 6.07 | How many time units (days, months, years) does the taxon require to reach the age-at-first-reproduction?                                                        | 2   |                                                                                                                                                                                                                                                                                                                                                                                                                                                                                                                                                                     | High      |
| <b>7. Dispersal mechanisms</b>  |      |                                                                                                                                                                 |     |                                                                                                                                                                                                                                                                                                                                                                                                                                                                                                                                                                     |           |
| 35                              | 7.01 | How many potential internal vectors/pathways could the taxon use to disperse within the RA area (with suitable protected areas (e.g. MCZ, MPA, SSSI)?           | > 1 | Human mediated translocation, natural dispersal                                                                                                                                                                                                                                                                                                                                                                                                                                                                                                                     | Medium    |
| 36                              | 7.02 | Will any of these vectors/pathways bring the taxon in close proximity to one or more protected areas (e.g. MCZ, MPA, SSSI)?                                     | Yes | Such territories are in Javakheti highland and along the Black Sea coast. The later is most probably unsuitable area while the former can be a suitable for the species                                                                                                                                                                                                                                                                                                                                                                                             | Low       |
| 37                              | 7.03 | Does the taxon have a means of actively attaching itself to hard substrata (e.g. ship hulls, pilings, buoys) such that it enhances the likelihood of dispersal? | No  | No such an evidence exists                                                                                                                                                                                                                                                                                                                                                                                                                                                                                                                                          | Very high |
| 38                              | 7.04 | Is natural dispersal of the taxon likely to occur as eggs (for animals) or as propagules (for plants: seeds, spores) in the RA area?                            | No  | Not expected because its native area is landlocked                                                                                                                                                                                                                                                                                                                                                                                                                                                                                                                  | Very high |
| 39                              | 7.05 | Is natural dispersal of the taxon likely to occur as larvae/juveniles (for animals) or as fragments/seedlings (for plants) in the RA area?                      | Yes | No documented evidence                                                                                                                                                                                                                                                                                                                                                                                                                                                                                                                                              | Medium    |
| 40                              | 7.06 | Are older life stages of the taxon likely to migrate in the RA area for reproduction?                                                                           | No  | The species is soawing in lakes                                                                                                                                                                                                                                                                                                                                                                                                                                                                                                                                     | High      |
| 41                              | 7.07 | Are propagules or eggs of the taxon likely to be dispersed in the RA area by other animals?                                                                     | No  | Not expected, not recorded                                                                                                                                                                                                                                                                                                                                                                                                                                                                                                                                          | Very high |

|                                |      |                                                                                                                                                                              |           |                                                                                                                                                                                                                                                                                                                                                                                                                                                                                                                                                                                               |           |
|--------------------------------|------|------------------------------------------------------------------------------------------------------------------------------------------------------------------------------|-----------|-----------------------------------------------------------------------------------------------------------------------------------------------------------------------------------------------------------------------------------------------------------------------------------------------------------------------------------------------------------------------------------------------------------------------------------------------------------------------------------------------------------------------------------------------------------------------------------------------|-----------|
| 42                             | 7.08 | Is dispersal of the taxon along any of the vectors/pathways mentioned in the previous seven questions (35–41; i.e. both unintentional or intentional) likely to be rapid?    | Yes       | For an aquaculture purpose, millions of fry/eggs are released usually Lavrovsky VV. On trout husbandry management in the U.S.S.R. First and Second Group Fellowship Study Tours on Inland Fisheries Research, Management and Fish Culture in the Union of Soviet Socialist Republics, 15 July–15 August 1965 and 31 May–2 July 1966, Lectures. Repository FAO/UNDP(TA) 2547. Rome: Food and Agriculture Organization of the United Nations; 1968. <a href="http://www.fao.org/docrep/005/77678e/77678E04.htm">http://www.fao.org/docrep/005/77678e/77678E04.htm</a> . Accessed 10 April 2016. | Very high |
| 43                             | 7.09 | Is dispersal of the taxon density dependent?                                                                                                                                 | No        | No documented evidence                                                                                                                                                                                                                                                                                                                                                                                                                                                                                                                                                                        | Low       |
| <b>8. Tolerance attributes</b> |      |                                                                                                                                                                              |           |                                                                                                                                                                                                                                                                                                                                                                                                                                                                                                                                                                                               |           |
| 44                             | 8.01 | Is the taxon able to withstand being out of water for extended periods (e.g. minimum of one or more hours) at some stage of its life cycle?                                  | No        | Professional judgement                                                                                                                                                                                                                                                                                                                                                                                                                                                                                                                                                                        | High      |
| 45                             | 8.02 | Is the taxon tolerant of a wide range of water quality conditions relevant to that taxon? [In the Justification field, indicate the relevant water quality variable(s) being | No        | Professional judgement                                                                                                                                                                                                                                                                                                                                                                                                                                                                                                                                                                        | Low       |
| 46                             | 8.03 | Can the taxon be controlled or eradicated in the wild with chemical, biological, or other agents/means?                                                                      | No        | No such a case is known                                                                                                                                                                                                                                                                                                                                                                                                                                                                                                                                                                       | Low       |
| 47                             | 8.04 | Is the taxon likely to tolerate or benefit from environmental/human disturbance?                                                                                             | No        | Professional judgement. Its abundance declined in the native area most probably due to human disturbance                                                                                                                                                                                                                                                                                                                                                                                                                                                                                      | Medium    |
| 48                             | 8.05 | Is the taxon able to tolerate salinity levels that are higher or lower than those found in its usual environment?                                                            | Yes       | In the areas of its introduction where established populations exist (e.g. Issyk kul) there are different salinity level compared to Svan lake                                                                                                                                                                                                                                                                                                                                                                                                                                                | Low       |
| 49                             | 8.06 | Are there effective natural enemies (predators) of the taxon present in the RA                                                                                               | No        | No such natural enemies are known                                                                                                                                                                                                                                                                                                                                                                                                                                                                                                                                                             | Medium    |
| <b>C. Climate change</b>       |      |                                                                                                                                                                              |           |                                                                                                                                                                                                                                                                                                                                                                                                                                                                                                                                                                                               |           |
| <b>9. Climate change</b>       |      |                                                                                                                                                                              |           |                                                                                                                                                                                                                                                                                                                                                                                                                                                                                                                                                                                               |           |
| 50                             | 9.01 | Under the predicted future climatic conditions, are the risks of entry into the RA area posed by the taxon likely to increase, decrease or not change?                       | No change | Based on professional judgement                                                                                                                                                                                                                                                                                                                                                                                                                                                                                                                                                               | Low       |
| 51                             | 9.02 | Under the predicted future climatic conditions, are the risks of establishment posed by the taxon likely to increase, decrease or not change?                                | No change | Based on professional judgement                                                                                                                                                                                                                                                                                                                                                                                                                                                                                                                                                               | Low       |
| 52                             | 9.03 | Under the predicted future climatic conditions, are the risks of dispersal within the RA area posed by the taxon likely to increase, decrease or not change?                 | No change | Based on professional judgement                                                                                                                                                                                                                                                                                                                                                                                                                                                                                                                                                               | Low       |
| 53                             | 9.04 | Under the predicted future climatic conditions, what is the likely magnitude of future potential impacts on biodiversity and/or ecological integrity/status?                 | No change | Based on professional judgement                                                                                                                                                                                                                                                                                                                                                                                                                                                                                                                                                               | Low       |
| 54                             | 9.05 | Under the predicted future climatic conditions, what is the likely magnitude of future potential impacts on ecosystem structure and/or function?                             | No change | Based on professional judgement                                                                                                                                                                                                                                                                                                                                                                                                                                                                                                                                                               | Low       |
| 55                             | 9.06 | Under the predicted future climatic conditions, what is the likely magnitude of future potential impacts on ecosystem services/socio-economic factors?                       | No change | Based on professional judgement                                                                                                                                                                                                                                                                                                                                                                                                                                                                                                                                                               | Low       |

| Statistics                                     |             |
|------------------------------------------------|-------------|
| Scores                                         |             |
| <b>BRA</b>                                     | <b>20.0</b> |
| <b>BRA Outcome</b>                             | <b>-</b>    |
| <b>BRA+CCA</b>                                 | <b>20.0</b> |
| <b>BRA+CCA Outcome</b>                         | <b>-</b>    |
| Score partition                                |             |
| <b>A. Biogeography/Historical</b>              | <b>7.0</b>  |
| 1. Domestication/Cultivation                   | 4.0         |
| 2. Climate, distribution and introduction risk | 1.0         |
| 3. Invasive elsewhere                          | 2.0         |
| <b>B. Biology/Ecology</b>                      | <b>13.0</b> |
| 4. Undesirable (or persistence) traits         | 2.0         |
| 5. Resource exploitation                       | 7.0         |
| 6. Reproduction                                | 3.0         |
| 7. Dispersal mechanisms                        | 0.0         |
| 8. Tolerance attributes                        | 1.0         |
| <b>C. Climate change</b>                       | <b>0.0</b>  |
| 9. Climate change                              | 0.0         |
| Answered Questions                             |             |
| <b>Total</b>                                   | <b>55</b>   |
| <b>A. Biogeography/Historical</b>              | <b>13</b>   |
| 1. Domestication/Cultivation                   | 3           |
| 2. Climate, distribution and introduction risk | 5           |
| 3. Invasive elsewhere                          | 5           |
| <b>B. Biology/Ecology</b>                      | <b>36</b>   |
| 4. Undesirable (or persistence) traits         | 12          |
| 5. Resource exploitation                       | 2           |
| 6. Reproduction                                | 7           |

|                                              |           |
|----------------------------------------------|-----------|
| 7. <i>Dispersal mechanisms</i>               | 9         |
| 8. <i>Tolerance attributes</i>               | 6         |
| <b>C. Climate change</b>                     | <b>6</b>  |
| 9. <i>Climate change</i>                     | 6         |
| <b>Sectors affected</b>                      |           |
| Commercial                                   | 6         |
| Environmental                                | 6         |
| <b>Species or population nuisance traits</b> | <b>12</b> |

|                   |         |      |
|-------------------|---------|------|
| <b>Thresholds</b> |         |      |
|                   | BRA     | -    |
|                   | BRA+CCA | -    |
| <b>Confidence</b> |         |      |
|                   | BRA+CCA | 0.53 |
|                   | BRA     | 0.56 |
|                   | CCA     | 0.25 |

|                      |  |
|----------------------|--|
| <b>Date and Time</b> |  |
| 16/05/2022 22:29:52  |  |

## AS-ISK v2

| Taxon and Assessor details         |                                                                                                      |
|------------------------------------|------------------------------------------------------------------------------------------------------|
| Category                           | Fishes and Lampreys (freshwater)                                                                     |
| Taxon name                         | <i>Salmo ischchan</i>                                                                                |
| Common name                        | Sevan trout                                                                                          |
| Assessor                           | Giorgi Eritashvili                                                                                   |
| Risk screening context             |                                                                                                      |
| Reason and socio-economic benefits | The trouts of the <i>Salmo ischchan</i> complex are endemic to Lake Sevan (Armenia). Four "forms" of |
| Risk assessment area               | South Caucasus                                                                                       |
| Taxonomy                           | <i>Salmo ischchan</i> subsp. <i>gegarkuni</i> Kessler, 1877                                          |
| Native range                       | Lake Sevan                                                                                           |
| Introduced range                   | Georgia, Azerbaijan                                                                                  |
| URL                                | <a href="https://www.fishbase.se/summary/4792">https://www.fishbase.se/summary/4792</a>              |

|                                                       |      |                                                                                                                                                                         | Response | Justification (references and/or other information)                                                                                                                                    | Confidence |
|-------------------------------------------------------|------|-------------------------------------------------------------------------------------------------------------------------------------------------------------------------|----------|----------------------------------------------------------------------------------------------------------------------------------------------------------------------------------------|------------|
| <b>A. Biogeography/Historical</b>                     |      |                                                                                                                                                                         |          |                                                                                                                                                                                        |            |
| <b>1. Domestication/Cultivation</b>                   |      |                                                                                                                                                                         |          |                                                                                                                                                                                        |            |
| 1                                                     | 1.01 | Has the taxon been the subject of domestication (or cultivation) for at least 20 generations?                                                                           | Yes      | At present, 17-18 tonnes of commercial fish are produced in Armenia, the bulk of which is the golden trout— <i>Salmo ischchan</i> .                                                    | Very high  |
| 2                                                     | 1.02 | Is the taxon harvested in the wild and likely to be sold or used in its live form?                                                                                      | Yes      | Poaching takes a substantial blame for the reduction in the stocks of Sevan trout. It has become so serious that it threatens the very existence of the species (Savvaitova and Petr). | Very high  |
| 3                                                     | 1.03 | Does the taxon have invasive races, varieties, sub-taxa or congeners?                                                                                                   | No       | No such fact has been detected yet                                                                                                                                                     | High       |
| <b>2. Climate, distribution and introduction risk</b> |      |                                                                                                                                                                         |          |                                                                                                                                                                                        |            |
| 4                                                     | 2.01 | How similar are the climatic conditions of the Risk Assessment (RA) area and the taxon's native range?                                                                  | High     | <i>S. gegarkuni</i> is naturally distributed in Lake Sevan which is one of the main reservoir in the South Caucasus Region.                                                            | Very high  |
| 5                                                     | 2.02 | What is the quality of the climate matching data?                                                                                                                       | High     | Climatic conditions in some regions of the South Caucasus are similar to lake Sevan, for instance in Javakheti region, Southern                                                        | Very high  |
| 6                                                     | 2.03 | Is the taxon already present outside of captivity in the RA area?                                                                                                       | Yes      | This fish is naturally distributed in Lake Sevan Armenia and also found in artificial reservoir "Tbilisi Sea" in Georgia (own data).                                                   | Very high  |
| 7                                                     | 2.04 | How many potential vectors could the taxon use to enter in the RA area?                                                                                                 | One      | This species is translocated within the SC region by human intentionally.                                                                                                              | High       |
| 8                                                     | 2.05 | Is the taxon currently found in close proximity to, and likely to enter into, the RA area in the near future (e.g. unintentional and intentional introductions)?        | Yes      | This fish is already exist in the SC region.                                                                                                                                           | Very high  |
| <b>3. Invasive elsewhere</b>                          |      |                                                                                                                                                                         |          |                                                                                                                                                                                        |            |
| 9                                                     | 3.01 | Has the taxon become naturalised (established viable populations) outside its native range?                                                                             | No       | This species has been translocated to other regions of the South Caucasus however, viable populations could not be formed there (Kuljanishvili et al. 2020).                           | Very high  |
| 10                                                    | 3.02 | In the taxon's introduced range, are there known adverse impacts to wild stocks or commercial taxa?                                                                     | No       | Such facts has not been detected yet                                                                                                                                                   | High       |
| 11                                                    | 3.03 | In the taxon's introduced range, are there known adverse impacts to aquaculture?                                                                                        | No       | Such facts has not been detected yet                                                                                                                                                   | High       |
| 12                                                    | 3.04 | In the taxon's introduced range, are there known adverse impacts to ecosystem                                                                                           | No       | Such facts has not been detected yet                                                                                                                                                   | High       |
| 13                                                    | 3.05 | In the taxon's introduced range, are there known adverse socio-economic impacts?                                                                                        | No       | Such facts has not been detected yet                                                                                                                                                   | High       |
| <b>B. Biology/Ecology</b>                             |      |                                                                                                                                                                         |          |                                                                                                                                                                                        |            |
| <b>4. Undesirable (or persistence) traits</b>         |      |                                                                                                                                                                         |          |                                                                                                                                                                                        |            |
| 14                                                    | 4.01 | Is it likely that the taxon will be poisonous or pose other risks to human health?                                                                                      | No       | This species does not pose a threat to humans                                                                                                                                          | Very high  |
| 15                                                    | 4.02 | Is it likely that the taxon will smother one or more native taxa (that are not threatened or protected)?                                                                | No       | Such facts has not been detected yet                                                                                                                                                   | High       |
| 16                                                    | 4.03 | Are there any threatened or protected taxa that the non-native taxon would parasitise in the RA area?                                                                   | No       | Such facts has not been detected yet                                                                                                                                                   | High       |
| 17                                                    | 4.04 | Is the taxon adaptable in terms of climatic and other environmental conditions, thus enhancing its potential persistence if it has invaded or could invade the RA area? | Yes      | Climatic conditions in some regions of the South Caucasus are similar to lake Sevan, for instance in Javakheti region, Southern Georgia                                                | Very high  |
| 18                                                    | 4.05 | Is the taxon likely to disrupt food-web structure/function in aquatic ecosystems if it has invaded or is likely to invade the RA                                        | No       | Such facts has not been detected yet                                                                                                                                                   | Medium     |
| 19                                                    | 4.06 | Is the taxon likely to exert adverse impacts on ecosystem services in the RA area?                                                                                      | No       | Due to the scarcity of species such a fact is not expected                                                                                                                             | High       |
| 20                                                    | 4.07 | Is it likely that the taxon will host, and/or act as a vector for, recognised pests and infectious agents that are endemic in the RA                                    | Yes      | Data Deficiencies                                                                                                                                                                      | Low        |
| 21                                                    | 4.08 | Is it likely that the taxon will host, and/or act as a vector for, recognised pests and infectious agents that are absent from (novel to) the RA area?                  | Yes      | Data Deficiencies                                                                                                                                                                      | Low        |
| 22                                                    | 4.09 | Is it likely that the taxon will achieve a body size that will make it more likely to be released from captivity?                                                       | Yes      | Max length of <i>S. ischchan</i> is 104 cm TL, max. published weight: 17.0 kg (Berg, 1962), therefore this species is being actively released from captivity.                          | High       |
| 23                                                    | 4.10 | Is the taxon capable of sustaining itself in a range of water velocity conditions (e.g. versatile in habitat use)?                                                      | Yes      | This fish can live in both standing and flowing waters.                                                                                                                                | Very high  |

|                                 |      |                                                                                                                                                                              |     |                                                                                                                                                                                                                                                                                                                                                                          |           |
|---------------------------------|------|------------------------------------------------------------------------------------------------------------------------------------------------------------------------------|-----|--------------------------------------------------------------------------------------------------------------------------------------------------------------------------------------------------------------------------------------------------------------------------------------------------------------------------------------------------------------------------|-----------|
| 24                              | 4.11 | Is it likely that the taxon's mode of existence (e.g. excretion of by-products) or behaviours (e.g. feeding) will reduce habitat quality for native taxa?                    | No  | Such fact is not known                                                                                                                                                                                                                                                                                                                                                   | Low       |
| 25                              | 4.12 | Is the taxon likely to maintain a viable population even when present in low densities (or persisting in adverse conditions by way of a dormant form)?                       | No  | This fish is critically endangered and largely or completely dependent on artificial reproduction and stocking (Kuljanishvili et al. 2020).                                                                                                                                                                                                                              | High      |
| <b>5. Resource exploitation</b> |      |                                                                                                                                                                              |     |                                                                                                                                                                                                                                                                                                                                                                          |           |
| 26                              | 5.01 | Is the taxon likely to consume threatened or protected native taxa in the RA area?                                                                                           | Yes | S. gegarkuni is a predator fish and can eat threatened or protected native species in the SC region.                                                                                                                                                                                                                                                                     | High      |
| 27                              | 5.02 | Is the taxon likely to sequester food resources (including nutrients) to the detriment of native taxa in the RA area?                                                        | Yes | S. gegarkuni is a predator fish and can be as a competitor for native taxa.                                                                                                                                                                                                                                                                                              | Medium    |
| <b>6. Reproduction</b>          |      |                                                                                                                                                                              |     |                                                                                                                                                                                                                                                                                                                                                                          |           |
| 28                              | 6.01 | Is the taxon likely to exhibit parental care and/or to reduce age-at-maturity in response to environmental conditions?                                                       | No  | No data                                                                                                                                                                                                                                                                                                                                                                  | Low       |
| 29                              | 6.02 | Is the taxon likely to produce viable gametes or propagules (in the RA area)?                                                                                                | Yes | The adult specimens of S. gegarkuni spawn in the lake Sevan proper at a depth range of 0.5 to 3 m, over fine gravel. Two spawning stocks are known: one spawns in the northwestern corner of the lake from the beginning of November till the end of December; the other spawns at the southeastern corner, from the middle or the end of January till the end of March. | Very high |
| 30                              | 6.03 | Is the taxon likely to hybridise naturally with native taxa?                                                                                                                 | No  | Such fact has not been detected                                                                                                                                                                                                                                                                                                                                          | Medium    |
| 31                              | 6.04 | Is the taxon likely to be hermaphroditic or to display asexual reproduction?                                                                                                 | No  | Such fact has not been described                                                                                                                                                                                                                                                                                                                                         | Medium    |
| 32                              | 6.05 | Is the taxon dependent on the presence of another taxon (or specific habitat features) to complete its life cycle?                                                           | Yes | The adult specimens of S. gegarkuni spawn in the lake Sevan proper at a depth range of 0.5 to 3 m, over fine gravel. Two spawning stocks are known: one spawns in the northwestern corner of the lake from the beginning of November till the end of December; the other spawns at the southeastern corner, from the middle or the end of January till the end of March. | High      |
| 33                              | 6.06 | Is the taxon known (or likely) to produce a large number of propagules or offspring within a short time span (e.g. < 1 year)?                                                | No  | Data deficiency                                                                                                                                                                                                                                                                                                                                                          | Medium    |
| 34                              | 6.07 | How many time units (days, months, years) does the taxon require to reach the age-at-first-reproduction?                                                                     | 3   | Data deficiency                                                                                                                                                                                                                                                                                                                                                          | Low       |
| <b>7. Dispersal mechanisms</b>  |      |                                                                                                                                                                              |     |                                                                                                                                                                                                                                                                                                                                                                          |           |
| 35                              | 7.01 | How many potential internal vectors/pathways could the taxon use to disperse within the RA area (with suitable vectors)?                                                     | One | This species can be dispersed only by restocking.                                                                                                                                                                                                                                                                                                                        | High      |
| 36                              | 7.02 | Will any of these vectors/pathways bring the taxon in close proximity to one or more protected areas (e.g. MCZ, MPA, SSSI)?                                                  | No  | Currently this species is not found in protected areas of the SC region.                                                                                                                                                                                                                                                                                                 | Low       |
| 37                              | 7.03 | Does the taxon have a means of actively attaching itself to hard substrata (e.g. ship hulls, pilings, buoys) such that it enhances the likelihood of dispersal?              | No  | This fish does not has such means.                                                                                                                                                                                                                                                                                                                                       | Very high |
| 38                              | 7.04 | Is natural dispersal of the taxon likely to occur as eggs (for animals) or as propagules (for plants: seeds, spores) in the RA area?                                         | No  | This taxon spreads within the region only by human                                                                                                                                                                                                                                                                                                                       | High      |
| 39                              | 7.05 | Is natural dispersal of the taxon likely to occur as larvae/juveniles (for animals) or as fragments/seedlings (for plants) in the RA area?                                   | No  | This taxon spreads within the region only by human                                                                                                                                                                                                                                                                                                                       | High      |
| 40                              | 7.06 | Are older life stages of the taxon likely to migrate in the RA area for reproduction?                                                                                        | Yes | This species migrates from Lake Sevan to its tributaries for reproduction.                                                                                                                                                                                                                                                                                               | High      |
| 41                              | 7.07 | Are propagules or eggs of the taxon likely to be dispersed in the RA area by other animals?                                                                                  | No  | No such fact has been described yet                                                                                                                                                                                                                                                                                                                                      | Low       |
| 42                              | 7.08 | Is dispersal of the taxon along any of the vectors/pathways mentioned in the previous seven questions (35–41; i.e. both unintentional or intentional) likely to be           | Yes | Data deficiencies                                                                                                                                                                                                                                                                                                                                                        | Low       |
| 43                              | 7.09 | Is dispersal of the taxon density dependent?                                                                                                                                 | No  | No data                                                                                                                                                                                                                                                                                                                                                                  | Low       |
| <b>8. Tolerance attributes</b>  |      |                                                                                                                                                                              |     |                                                                                                                                                                                                                                                                                                                                                                          |           |
| 44                              | 8.01 | Is the taxon able to withstand being out of water for extended periods (e.g. minimum of one or more hours) at some stage of its life cycle?                                  | No  | This species cannot live without water and dies quickly                                                                                                                                                                                                                                                                                                                  | Very high |
| 45                              | 8.02 | Is the taxon tolerant of a wide range of water quality conditions relevant to that taxon? [In the Justification field, indicate the relevant water quality variable(s) being | No  | This species as well as many other species from this genus is sensitive to water quality                                                                                                                                                                                                                                                                                 | High      |
| 46                              | 8.03 | Can the taxon be controlled or eradicated in the wild with chemical, biological, or other agents/means?                                                                      | No  | Currently there is no need for that.                                                                                                                                                                                                                                                                                                                                     | High      |
| 47                              | 8.04 | Is the taxon likely to tolerate or benefit from environmental/human disturbance?                                                                                             | No  | Data deficient                                                                                                                                                                                                                                                                                                                                                           | High      |
| 48                              | 8.05 | Is the taxon able to tolerate salinity levels that are higher or lower than those found in its usual environment?                                                            | No  | This fish is typical freshwater species.                                                                                                                                                                                                                                                                                                                                 | High      |

|                          |      |                                                                                                                                                              |          |                                                                                                                                                        |      |
|--------------------------|------|--------------------------------------------------------------------------------------------------------------------------------------------------------------|----------|--------------------------------------------------------------------------------------------------------------------------------------------------------|------|
| 49                       | 8.06 | Are there effective natural enemies (predators) of the taxon present in the RA area?                                                                         | Yes      | There are some species in the SC region which can eat S. ischchan: e.g. Esox lucius, Salmo spp and etc (Ninua et al. 2013; Kuljanishvili et al. 2020). | High |
| <b>C. Climate change</b> |      |                                                                                                                                                              |          |                                                                                                                                                        |      |
| <b>9. Climate change</b> |      |                                                                                                                                                              |          |                                                                                                                                                        |      |
| 50                       | 9.01 | Under the predicted future climatic conditions, are the risks of entry into the RA area posed by the taxon likely to increase, decrease or not change?       | Decrease | Global warming will cause a change in the level of Lake Sevan which will negatively affect this species (Own judgement)                                | High |
| 51                       | 9.02 | Under the predicted future climatic conditions, are the risks of establishment posed by the taxon likely to increase, decrease or not change?                | Decrease | Global warming will cause a change in the level of Lake Sevan which will negatively affect this species (Own judgement)                                | High |
| 52                       | 9.03 | Under the predicted future climatic conditions, are the risks of dispersal within the RA area posed by the taxon likely to increase, decrease or not change? | Decrease | Global warming will cause a change in the level of Lake Sevan which will negatively affect this species (Own judgement)                                | High |
| 53                       | 9.04 | Under the predicted future climatic conditions, what is the likely magnitude of future potential impacts on biodiversity and/or ecological integrity/status? | Lower    | Global warming will cause a change in the level of Lake Sevan which will negatively affect this species (Own judgement)                                | High |
| 54                       | 9.05 | Under the predicted future climatic conditions, what is the likely magnitude of future potential impacts on ecosystem structure and/or function?             | Lower    | Global warming will cause a change in the level of Lake Sevan which will negatively affect this species (Own judgement)                                | High |
| 55                       | 9.06 | Under the predicted future climatic conditions, what is the likely magnitude of future potential impacts on ecosystem services/socio-economic factors?       | Lower    | Global warming will cause a change in the level of Lake Sevan which will negatively affect this species (Own judgement)                                | High |

| Statistics                                     |              |
|------------------------------------------------|--------------|
| Scores                                         |              |
| <b>BRA</b>                                     | <b>5.0</b>   |
| <b>BRA Outcome</b>                             | <b>-</b>     |
| <b>BRA+CCA</b>                                 | <b>-7.0</b>  |
| <b>BRA+CCA Outcome</b>                         | <b>-</b>     |
| Score partition                                |              |
| <b>A. Biogeography/Historical</b>              | <b>1.0</b>   |
| 1. Domestication/Cultivation                   | 2.0          |
| 2. Climate, distribution and introduction risk | 1.0          |
| 3. Invasive elsewhere                          | -2.0         |
| <b>B. Biology/Ecology</b>                      | <b>4.0</b>   |
| 4. Undesirable (or persistence) traits         | 5.0          |
| 5. Resource exploitation                       | 7.0          |
| 6. Reproduction                                | -2.0         |
| 7. Dispersal mechanisms                        | -2.0         |
| 8. Tolerance attributes                        | -4.0         |
| <b>C. Climate change</b>                       | <b>-12.0</b> |
| 9. Climate change                              | -12.0        |
| Answered Questions                             |              |
| <b>Total</b>                                   | <b>55</b>    |
| <b>A. Biogeography/Historical</b>              | <b>13</b>    |
| 1. Domestication/Cultivation                   | 3            |
| 2. Climate, distribution and introduction risk | 5            |
| 3. Invasive elsewhere                          | 5            |
| <b>B. Biology/Ecology</b>                      | <b>36</b>    |
| 4. Undesirable (or persistence) traits         | 12           |
| 5. Resource exploitation                       | 2            |
| 6. Reproduction                                | 7            |
| 7. Dispersal mechanisms                        | 9            |
| 8. Tolerance attributes                        | 6            |
| <b>C. Climate change</b>                       | <b>6</b>     |
| 9. Climate change                              | 6            |
| Sectors affected                               |              |
| <b>Commercial</b>                              | <b>3</b>     |
| <b>Environmental</b>                           | <b>1</b>     |
| <b>Species or population nuisance traits</b>   | <b>-9</b>    |

| Thresholds     |             |
|----------------|-------------|
| <b>BRA</b>     | <b>-</b>    |
| <b>BRA+CCA</b> | <b>-</b>    |
| Confidence     |             |
| <b>BRA+CCA</b> | <b>0.70</b> |
| <b>BRA</b>     | <b>0.70</b> |
| <b>CCA</b>     | <b>0.75</b> |

| Date and Time       |
|---------------------|
| 13/05/2022 18:10:26 |



AS-ISK v2

| Taxon and Assessor details         |                                                                                                                         |
|------------------------------------|-------------------------------------------------------------------------------------------------------------------------|
| Category                           | Fishes and Lampreys (freshwater)                                                                                        |
| Taxon name                         | <i>Salmo ischchan</i>                                                                                                   |
| Common name                        | Sevan trout                                                                                                             |
| Assessor                           | Tatia Kuljanishvili                                                                                                     |
| Risk screening context             |                                                                                                                         |
| Reason and socio-economic benefits | This species was introduced into Georgia in the 1930s, first to Tabatskuri Lake in 1930-35, then in                     |
| Risk assessment area               | South Caucasus                                                                                                          |
| Taxonomy                           | This species was introduced into Georgia in the 1930s, first to Tabatskuri Lake in 1930-35, then in                     |
| Native range                       | Armenia (Sevan Lake)                                                                                                    |
| Introduced range                   | Azerbaijan, Georgia.                                                                                                    |
| URL                                | <a href="https://fishbase.mnhn.fr/summary/Salmo-ischchan.html">https://fishbase.mnhn.fr/summary/Salmo-ischchan.html</a> |

|                                                |      |                                                                                                                                                                         | Response | Justification (references and/or other information)                                                                                                                                                                                                                                                                                                                            | Confidence |
|------------------------------------------------|------|-------------------------------------------------------------------------------------------------------------------------------------------------------------------------|----------|--------------------------------------------------------------------------------------------------------------------------------------------------------------------------------------------------------------------------------------------------------------------------------------------------------------------------------------------------------------------------------|------------|
| A. Biogeography/Historical                     |      |                                                                                                                                                                         |          |                                                                                                                                                                                                                                                                                                                                                                                |            |
| 1. Domestication/Cultivation                   |      |                                                                                                                                                                         |          |                                                                                                                                                                                                                                                                                                                                                                                |            |
| 1                                              | 1.01 | Has the taxon been the subject of domestication (or cultivation) for at least 20 generations?                                                                           | Yes      | S. gegarkui has been commercial species and it has been bred in Armenia more than 20 generations                                                                                                                                                                                                                                                                               | Very high  |
| 2                                              | 1.02 | Is the taxon harvested in the wild and likely to be sold or used in its live form?                                                                                      | Yes      | Since the species is the commercially valuable, it is being harvested from the wild, and it can also be sold in its live form, for commercial purposes.                                                                                                                                                                                                                        | Very high  |
| 3                                              | 1.03 | Does the taxon have invasive races, varieties, sub-taxa or congeners?                                                                                                   | Yes      | Salmonid fishes are widly introduced throughout the world due to their commercial value. Some salmonid species are considered as invasive, for instance <i>Salmo salar</i>                                                                                                                                                                                                     | High       |
| 2. Climate, distribution and introduction risk |      |                                                                                                                                                                         |          |                                                                                                                                                                                                                                                                                                                                                                                |            |
| 4                                              | 2.01 | How similar are the climatic conditions of the Risk Assessment (RA) area and the taxon's native range?                                                                  | High     | The number of climtic stations are not sufficient for climatch analysis. However according to Koppen Geiger climate map they are similar                                                                                                                                                                                                                                       | High       |
| 5                                              | 2.02 | What is the quality of the climate matching data?                                                                                                                       | High     | I would say it is high                                                                                                                                                                                                                                                                                                                                                         | High       |
| 6                                              | 2.03 | Is the taxon already present outside of captivity in the RA area?                                                                                                       | Yes      | This species was introduced into Georgia in the 1930s, first to Tabatskuri Lake in 1930-35, then in Paravani Lake in 1970, and in Tbilisi Reservoir around the 1980s. It was released into the Azerbaijani reservoirs and lakes in the 1970s (e.g., Maralgel Lake in 1977) for aquaculture (Elanidze, 1983; Musayev et al., 2004; Kuljanishvili et al., 2020)                  | Very high  |
| 7                                              | 2.04 | How many potential vectors could the taxon use to enter in the RA area?                                                                                                 | >1       | Aquaculture, recriational fisheries.                                                                                                                                                                                                                                                                                                                                           | Very high  |
| 8                                              | 2.05 | Is the taxon currently found in close proximity to, and likely to enter into, the RA area in the near future (e.g. unintentional and intentional introductions)?        | Yes      | This species presents in Tbilisi Reservoir, and possibly also in mountain lakes of the Kalbajar region of Azerbaijan. However, nobody has confirmed if this species is truly S. gegarkuni                                                                                                                                                                                      | Medium     |
| 3. Invasive elsewhere                          |      |                                                                                                                                                                         |          |                                                                                                                                                                                                                                                                                                                                                                                |            |
| 9                                              | 3.01 | Has the taxon become naturalised (established viable populations) outside its native range?                                                                             | Yes      | It is believed that this species has been naturalised in Georgian and Azerbaijani water bodies, however there is only records from fishermen, it needs scientific proof                                                                                                                                                                                                        | Medium     |
| 10                                             | 3.02 | In the taxon's introduced range, are there known adverse impacts to wild stocks or commercial taxa?                                                                     | Yes      | Yusifov et al., 2017 reported that after the introduction of S. gegarkuni (named as S. ischchan) in the Kalbajar region, the native trout species populations decreased in abundance to the point where they were included on the Red List of Endangered Species in Azerbaijan.                                                                                                | High       |
| 11                                             | 3.03 | In the taxon's introduced range, are there known adverse impacts to aquaculture?                                                                                        | Yes      | Yusifov et al., 2017 reported that after the introduction of S. gegarkuni (named as S. ischchan) in the Kalbajar region, the native trout species populations decreased in abundance to the point where they were included on the Red List of Endangered Species in Azerbaijan.                                                                                                | High       |
| 12                                             | 3.04 | In the taxon's introduced range, are there known adverse impacts to ecosystem                                                                                           | Yes      | It can only be transmitting parasites and deseases, however the introductions are not rapid and this information needs evidence.                                                                                                                                                                                                                                               | Low        |
| 13                                             | 3.05 | In the taxon's introduced range, are there known adverse socio-economic impacts?                                                                                        | No       | In Azerbaijan it might have affected commercial fishing on native trouts, but it is not documented.                                                                                                                                                                                                                                                                            | Low        |
| B. Biology/Ecology                             |      |                                                                                                                                                                         |          |                                                                                                                                                                                                                                                                                                                                                                                |            |
| 4. Undesirable (or persistence) traits         |      |                                                                                                                                                                         |          |                                                                                                                                                                                                                                                                                                                                                                                |            |
| 14                                             | 4.01 | Is it likely that the taxon will be poisonous or pose other risks to human health?                                                                                      | No       | Not poisonous                                                                                                                                                                                                                                                                                                                                                                  | Very high  |
| 15                                             | 4.02 | Is it likely that the taxon will smother one or more native taxa (that are not threatened or protected)?                                                                | Yes      | It is possible that it might be in competition with native <i>Salmo caspius</i> . and Actually Yusifov et al., 2017 reported that after the introduction of S. gegarkuni (named as S. ischchan) in the Kalbajar region, the native trout species populations decreased in abundance to the point where they were included on the Red List of Endangered Species in Azerbaijan. | Medium     |
| 16                                             | 4.03 | Are there any threatened or protected taxa that the non-native taxon would parasitise in the RA area?                                                                   | No       | Does not parasite                                                                                                                                                                                                                                                                                                                                                              | Very high  |
| 17                                             | 4.04 | Is the taxon adaptable in terms of climatic and other environmental conditions, thus enhancing its potential persistence if it has invaded or could invade the RA area? | No       | This are very sensitive species and can not tolerate variable environmental condititions.                                                                                                                                                                                                                                                                                      | High       |
| 18                                             | 4.05 | Is the taxon likely to disrupt food-web structure/function in aquatic ecosystems if it has invaded or is likely to invade the RA                                        | Yes      | It is possible, however it is not documented.                                                                                                                                                                                                                                                                                                                                  | Low        |
| 19                                             | 4.06 | Is the taxon likely to exert adverse impacts on ecosystem services in the RA area?                                                                                      | No       | No adverse impacts on ecosystem services havebeen documented                                                                                                                                                                                                                                                                                                                   | High       |

|                                 |      |                                                                                                                                                                              |     |                                                                                                                                                             |           |
|---------------------------------|------|------------------------------------------------------------------------------------------------------------------------------------------------------------------------------|-----|-------------------------------------------------------------------------------------------------------------------------------------------------------------|-----------|
| 20                              | 4.07 | Is it likely that the taxon will host, and/or act as a vector for, recognised pests and infectious agents that are endemic in the RA                                         | Yes | It is possible. however there is no evidence                                                                                                                | Medium    |
| 21                              | 4.08 | Is it likely that the taxon will host, and/or act as a vector for, recognised pests and infectious agents that are absent from (novel to) the RA area?                       | Yes | It is possible. however there is no evidence                                                                                                                | Medium    |
| 22                              | 4.09 | Is it likely that the taxon will achieve a body size that will make it more likely to be released from captivity?                                                            | Yes | Yes. See: <a href="https://fishbase.mnhn.fr/summary/Salmo-ischchan.html">https://fishbase.mnhn.fr/summary/Salmo-ischchan.html</a>                           | Very high |
| 23                              | 4.10 | Is the taxon capable of sustaining itself in a range of water velocity conditions (e.g. versatile in habitat use)?                                                           | Yes | This species can sustain in a range of water velocity conditions                                                                                            | Very high |
| 24                              | 4.11 | Is it likely that the taxon's mode of existence (e.g. excretion of by-products) or behaviours (e.g. feeding) will reduce habitat quality for native taxa?                    | No  | No                                                                                                                                                          | Medium    |
| 25                              | 4.12 | Is the taxon likely to maintain a viable population even when present in low densities (or persisting in adverse conditions by way of a dormant form)?                       | No  | Has not been documented                                                                                                                                     | Low       |
| <b>5. Resource exploitation</b> |      |                                                                                                                                                                              |     |                                                                                                                                                             |           |
| 26                              | 5.01 | Is the taxon likely to consume threatened or protected native taxa in the RA area?                                                                                           | Yes | Adults might consume small fish of native species                                                                                                           | High      |
| 27                              | 5.02 | Is the taxon likely to sequester food resources (including nutrients) to the detriment of native taxa in the RA area?                                                        | No  | No information about it                                                                                                                                     | Low       |
| <b>6. Reproduction</b>          |      |                                                                                                                                                                              |     |                                                                                                                                                             |           |
| 28                              | 6.01 | Is the taxon likely to exhibit parental care and/or to reduce age-at-maturity in response to environmental conditions?                                                       | No  | Does not exhibit parental care See: <a href="https://fishbase.mnhn.fr/summary/Salmo-ischchan.html">https://fishbase.mnhn.fr/summary/Salmo-ischchan.html</a> | High      |
| 29                              | 6.02 | Is the taxon likely to produce viable gametes or propagules (in the RA area)?                                                                                                | Yes | Yes. since the conditions are available. However, more research is needed to prove this point.                                                              | Medium    |
| 30                              | 6.03 | Is the taxon likely to hybridise naturally with native taxa?                                                                                                                 | No  | It is possible however it needs evidence                                                                                                                    | Low       |
| 31                              | 6.04 | Is the taxon likely to be hermaphroditic or to display asexual reproduction?                                                                                                 | No  | No. Does not display asexual reproduction                                                                                                                   | High      |
| 32                              | 6.05 | Is the taxon dependent on the presence of another taxon (or specific habitat features) to complete its life cycle?                                                           | No  | No. See: <a href="https://fishbase.mnhn.fr/summary/Salmo-ischchan.html">https://fishbase.mnhn.fr/summary/Salmo-ischchan.html</a>                            | Very high |
| 33                              | 6.06 | Is the taxon known (or likely) to produce a large number of propagules or offspring within a short time span (e.g. < 1 year)?                                                | No  | Fecundity can be something between 1300-7460 (Bogdanowicz et al 2017)                                                                                       | High      |
| 34                              | 6.07 | How many time units (days, months, years) does the taxon require to reach the age-at-first-reproduction?                                                                     | 3   | adults spawn around 3-4 age                                                                                                                                 | High      |
| <b>7. Dispersal mechanisms</b>  |      |                                                                                                                                                                              |     |                                                                                                                                                             |           |
| 35                              | 7.01 | How many potential internal vectors/pathways could the taxon use to disperse within the RA area (with suitable)                                                              | > 1 | Aquaculture, Recreational fisheries                                                                                                                         | High      |
| 36                              | 7.02 | Will any of these vectors/pathways bring the taxon in close proximity to one or more protected areas (e.g. MCZ, MPA, SSSI)?                                                  | Yes | It is possible                                                                                                                                              | Medium    |
| 37                              | 7.03 | Does the taxon have a means of actively attaching itself to hard substrata (e.g. ship hulls, pilings, buoys) such that it enhances the likelihood of dispersal?              | No  | No. Morphologically this species does not have a means of actively attaching itself to hard substrata                                                       | Very high |
| 38                              | 7.04 | Is natural dispersal of the taxon likely to occur as eggs (for animals) or as propagules (for plants: seeds, spores) in the RA area?                                         | No  | No. can not be distributed as eggs.                                                                                                                         | High      |
| 39                              | 7.05 | Is natural dispersal of the taxon likely to occur as larvae/juveniles (for animals) or as fragments/seedlings (for plants) in the RA area?                                   | Yes | It is possible                                                                                                                                              | Medium    |
| 40                              | 7.06 | Are older life stages of the taxon likely to migrate in the RA area for reproduction?                                                                                        | No  | Does not migrate for reproduction                                                                                                                           | Medium    |
| 41                              | 7.07 | Are propagules or eggs of the taxon likely to be dispersed in the RA area by other animals?                                                                                  | No  | No. Can not be dispersed by other animals                                                                                                                   | Very high |
| 42                              | 7.08 | Is dispersal of the taxon along any of the vectors/pathways mentioned in the previous seven questions (35-41; i.e. both unintentional or intentional) likely to be           | No  | No information available                                                                                                                                    | High      |
| 43                              | 7.09 | Is dispersal of the taxon density dependent?                                                                                                                                 | No  | No information about it                                                                                                                                     | Low       |
| <b>8. Tolerance attributes</b>  |      |                                                                                                                                                                              |     |                                                                                                                                                             |           |
| 44                              | 8.01 | Is the taxon able to withstand being out of water for extended periods (e.g. minimum of one or more hours) at some stage of its life cycle?                                  | No  | No information available                                                                                                                                    | High      |
| 45                              | 8.02 | Is the taxon tolerant of a wide range of water quality conditions relevant to that taxon? [In the Justification field, indicate the relevant water quality variable(s) being | No  | Can not tolerate low oxygen environment and is very sensitive to temperature and to human-produced chemicals.                                               | Very high |
| 46                              | 8.03 | Can the taxon be controlled or eradicated in the wild with chemical, biological, or other agents/means?                                                                      | Yes | It can be no documented evidence tho                                                                                                                        | Medium    |

|                          |      |                                                                                                                                                              |          |                                                                                                                                                                                                                                                      |           |
|--------------------------|------|--------------------------------------------------------------------------------------------------------------------------------------------------------------|----------|------------------------------------------------------------------------------------------------------------------------------------------------------------------------------------------------------------------------------------------------------|-----------|
| 47                       | 8.04 | Is the taxon likely to tolerate or benefit from environmental/human disturbance?                                                                             | No       | Very sensitive species and can not tolerate human disturbance.                                                                                                                                                                                       | Very high |
| 48                       | 8.05 | Is the taxon able to tolerate salinity levels that are higher or lower than those found in its usual environment?                                            | No       | No information available                                                                                                                                                                                                                             | Low       |
| 49                       | 8.06 | Are there effective natural enemies (predators) of the taxon present in the RA                                                                               | No       | No effective natural enemies present in RA area                                                                                                                                                                                                      | Very high |
| <b>C. Climate change</b> |      |                                                                                                                                                              |          |                                                                                                                                                                                                                                                      |           |
| <b>9. Climate change</b> |      |                                                                                                                                                              |          |                                                                                                                                                                                                                                                      |           |
| 50                       | 9.01 | Under the predicted future climatic conditions, are the risks of entry into the RA area posed by the taxon likely to increase, decrease or not change?       | Increase | It was hypothesized that climate change might alert the mechanisms of transportation and introduction of non-native species. Commercial and recreational activities will increase, that itself increases the propagule pressure levels of non-native | Very high |
| 51                       | 9.02 | Under the predicted future climatic conditions, are the risks of establishment posed by the taxon likely to increase, decrease or not change?                | Decrease | In terms of increased temperatures this species will be having troubles to survive in the wild                                                                                                                                                       | Medium    |
| 52                       | 9.03 | Under the predicted future climatic conditions, are the risks of dispersal within the RA area posed by the taxon likely to increase, decrease or not change? | Decrease | Increased temperatures will cause stress in their populations making their populations weaker.                                                                                                                                                       | High      |
| 53                       | 9.04 | Under the predicted future climatic conditions, what is the likely magnitude of future potential impacts on biodiversity and/or ecological integrity/status? | Lower    | The environment for them will be unbearable and this species populations will decrease, reducing the impact on biodiversity                                                                                                                          | High      |
| 54                       | 9.05 | Under the predicted future climatic conditions, what is the likely magnitude of future potential impacts on ecosystem structure and/or function?             | Lower    | The magnitude of future potential impact is low.                                                                                                                                                                                                     | High      |
| 55                       | 9.06 | Under the predicted future climatic conditions, what is the likely magnitude of future potential impacts on ecosystem services/socio-economic factors?       | Lower    | The magnitude of future potential impact is low.                                                                                                                                                                                                     | High      |

| Statistics                                     |             |
|------------------------------------------------|-------------|
| Scores                                         |             |
| <b>BRA</b>                                     | <b>25.0</b> |
| <b>BRA Outcome</b>                             | <b>-</b>    |
| <b>BRA+CCA</b>                                 | <b>17.0</b> |
| <b>BRA+CCA Outcome</b>                         | <b>-</b>    |
| Score partition                                |             |
| <b>A. Biogeography/Historical</b>              | <b>20.0</b> |
| 1. Domestication/Cultivation                   | 4.0         |
| 2. Climate, distribution and introduction risk | 2.0         |
| 3. Invasive elsewhere                          | 14.0        |
| <b>B. Biology/Ecology</b>                      | <b>5.0</b>  |
| 4. Undesirable (or persistence) traits         | 5.0         |
| 5. Resource exploitation                       | 5.0         |
| 6. Reproduction                                | 0.0         |
| 7. Dispersal mechanisms                        | -1.0        |
| 8. Tolerance attributes                        | -4.0        |
| <b>C. Climate change</b>                       | <b>-8.0</b> |
| 9. Climate change                              | -8.0        |
| Answered Questions                             |             |
| <b>Total</b>                                   | <b>55</b>   |
| <b>A. Biogeography/Historical</b>              | <b>13</b>   |
| 1. Domestication/Cultivation                   | 3           |
| 2. Climate, distribution and introduction risk | 5           |
| 3. Invasive elsewhere                          | 5           |
| <b>B. Biology/Ecology</b>                      | <b>36</b>   |
| 4. Undesirable (or persistence) traits         | 12          |
| 5. Resource exploitation                       | 2           |
| 6. Reproduction                                | 7           |
| 7. Dispersal mechanisms                        | 9           |
| 8. Tolerance attributes                        | 6           |
| <b>C. Climate change</b>                       | <b>6</b>    |
| 9. Climate change                              | 6           |
| Sectors affected                               |             |
| <b>Commercial</b>                              | <b>12</b>   |
| <b>Environmental</b>                           | <b>7</b>    |
| <b>Species or population nuisance traits</b>   | <b>2</b>    |

| Thresholds     |             |
|----------------|-------------|
| <b>BRA</b>     | <b>-</b>    |
| <b>BRA+CCA</b> | <b>-</b>    |
| Confidence     |             |
| <b>BRA+CCA</b> | <b>0.69</b> |
| <b>BRA</b>     | <b>0.68</b> |
| <b>CCA</b>     | <b>0.75</b> |

| Date and Time       |
|---------------------|
| 22/05/2022 15:44:31 |

AS-ISK v2

| Taxon and Assessor details         |                                                                                                                   |
|------------------------------------|-------------------------------------------------------------------------------------------------------------------|
| Category                           | Fishes and Lampreys (freshwater)                                                                                  |
| Taxon name                         | <i>Salmo trutta</i>                                                                                               |
| Common name                        | brown trout                                                                                                       |
| Assessor                           | Bella Japoshvili                                                                                                  |
| Risk screening context             |                                                                                                                   |
| Reason and socio-economic benefits | The species was introduced in the South Caucasus region and still is considered as having                         |
| Risk assessment area               | South Caucasus                                                                                                    |
| Taxonomy                           | Actinopteri (ray-finned fishes) > Salmoniformes (Salmons) > Salmonidae (Salmonids)                                |
| Native range                       | North Atlantic basin                                                                                              |
| Introduced range                   | Many european Countries                                                                                           |
| URL                                | <a href="https://www.fishbase.de/summary/Salmo-trutta.html">https://www.fishbase.de/summary/Salmo-trutta.html</a> |

|                                                |      | Response                                                                                                                                                                | Justification (references and/or other information) | Confidence                                                                                                                                                                                                       |           |
|------------------------------------------------|------|-------------------------------------------------------------------------------------------------------------------------------------------------------------------------|-----------------------------------------------------|------------------------------------------------------------------------------------------------------------------------------------------------------------------------------------------------------------------|-----------|
| A. Biogeography/Historical                     |      |                                                                                                                                                                         |                                                     |                                                                                                                                                                                                                  |           |
| 1. Domestication/Cultivation                   |      |                                                                                                                                                                         |                                                     |                                                                                                                                                                                                                  |           |
| 1                                              | 1.01 | Has the taxon been the subject of domestication (or cultivation) for at least 20 generations?                                                                           | Yes                                                 | Krieg, F., Quillet, E., & Chevassus, B. (1992). Brown trout, <i>Salmo trutta</i> L.: a new species for intensive marine aquaculture. <i>Aquaculture Research</i> , 23(5), 557-566.                               | Medium    |
| 2                                              | 1.02 | Is the taxon harvested in the wild and likely to be sold or used in its live form?                                                                                      | Yes                                                 | Not well documented, but mostly farmed individuals/propagules are distributed                                                                                                                                    | Low       |
| 3                                              | 1.03 | Does the taxon have invasive races, varieties, sub-taxa or congeners?                                                                                                   | Yes                                                 | Other salmonids                                                                                                                                                                                                  | High      |
| 2. Climate, distribution and introduction risk |      |                                                                                                                                                                         |                                                     |                                                                                                                                                                                                                  |           |
| 4                                              | 2.01 | How similar are the climatic conditions of the Risk Assessment (RA) area and the taxon's native range?                                                                  | High                                                | Results of climatch algorithm                                                                                                                                                                                    | Low       |
| 5                                              | 2.02 | What is the quality of the climate matching data?                                                                                                                       | Low                                                 | Due to low accuracy of local climate data                                                                                                                                                                        | High      |
| 6                                              | 2.03 | Is the taxon already present outside of captivity in the RA area?                                                                                                       | Yes                                                 | Ryan, C. 2014. "Salmo trutta" (On-line), Animal Diversity Web. Accessed November 12, 2021 at <a href="https://animaldiversity.org/accounts/Salmo_trutta/">https://animaldiversity.org/accounts/Salmo_trutta/</a> | Very high |
| 7                                              | 2.04 | How many potential vectors could the taxon use to enter in the RA area?                                                                                                 | >1                                                  | Human mediated dispersal                                                                                                                                                                                         | High      |
| 8                                              | 2.05 | Is the taxon currently found in close proximity to, and likely to enter into, the RA area in the near future (e.g. unintentional and intentional introductions)?        | Yes                                                 | Kottelat, M., & Freyhof, J. (2007). Handbook of European freshwater fishes. Publications Kottelat.                                                                                                               | High      |
| 3. Invasive elsewhere                          |      |                                                                                                                                                                         |                                                     |                                                                                                                                                                                                                  |           |
| 9                                              | 3.01 | Has the taxon become naturalised (established viable populations) outside its native range?                                                                             | Yes                                                 | Ryan, C. 2014. "Salmo trutta" (On-line), Animal Diversity Web. Accessed November 12, 2021 at <a href="https://animaldiversity.org/accounts/Salmo_trutta/">https://animaldiversity.org/accounts/Salmo_trutta/</a> | High      |
| 10                                             | 3.02 | In the taxon's introduced range, are there known adverse impacts to wild stocks or commercial taxa?                                                                     | Yes                                                 | Ryan, C. 2014. "Salmo trutta" (On-line), Animal Diversity Web. Accessed November 12, 2021 at <a href="https://animaldiversity.org/accounts/Salmo_trutta/">https://animaldiversity.org/accounts/Salmo_trutta/</a> | Medium    |
| 11                                             | 3.03 | In the taxon's introduced range, are there known adverse impacts to aquaculture?                                                                                        | No                                                  | Not documented evidence exists                                                                                                                                                                                   | Medium    |
| 12                                             | 3.04 | In the taxon's introduced range, are there known adverse impacts to ecosystem services?                                                                                 | Yes                                                 | Ryan, C. 2014. "Salmo trutta" (On-line), Animal Diversity Web. Accessed November 12, 2021 at <a href="https://animaldiversity.org/accounts/Salmo_trutta/">https://animaldiversity.org/accounts/Salmo_trutta/</a> | Low       |
| 13                                             | 3.05 | In the taxon's introduced range, are there known adverse socio-economic impacts?                                                                                        | Yes                                                 | Ryan, C. 2014. "Salmo trutta" (On-line), Animal Diversity Web. Accessed November 12, 2021 at <a href="https://animaldiversity.org/accounts/Salmo_trutta/">https://animaldiversity.org/accounts/Salmo_trutta/</a> | Low       |
| B. Biology/Ecology                             |      |                                                                                                                                                                         |                                                     |                                                                                                                                                                                                                  |           |
| 4. Undesirable (or persistence) traits         |      |                                                                                                                                                                         |                                                     |                                                                                                                                                                                                                  |           |
| 14                                             | 4.01 | Is it likely that the taxon will be poisonous or pose other risks to human health?                                                                                      | No                                                  | Not a harmful species                                                                                                                                                                                            | Very high |
| 15                                             | 4.02 | Is it likely that the taxon will smother one or more native taxa (that are not threatened or protected)?                                                                | Yes                                                 | Ryan, C. 2014. "Salmo trutta" (On-line), Animal Diversity Web. Accessed November 12, 2021 at <a href="https://animaldiversity.org/accounts/Salmo_trutta/">https://animaldiversity.org/accounts/Salmo_trutta/</a> | Medium    |
| 16                                             | 4.03 | Are there any threatened or protected taxa that the non-native taxon would parasitise in the RA area?                                                                   | No                                                  | The species is a predator mostly consuming arthropod larvae. Thus there are number of species that can be destroyed by this species such as larvae of Gomphidae                                                  | Very high |
| 17                                             | 4.04 | Is the taxon adaptable in terms of climatic and other environmental conditions, thus enhancing its potential persistence if it has invaded or could invade the RA area? | No                                                  | Not known                                                                                                                                                                                                        | Low       |
| 18                                             | 4.05 | Is the taxon likely to disrupt food-web structure/function in aquatic ecosystems if it has invaded or is likely to invade the RA area?                                  | Yes                                                 | Ryan, C. 2014. "Salmo trutta" (On-line), Animal Diversity Web. Accessed November 12, 2021 at <a href="https://animaldiversity.org/accounts/Salmo_trutta/">https://animaldiversity.org/accounts/Salmo_trutta/</a> | Low       |
| 19                                             | 4.06 | Is the taxon likely to exert adverse impacts on ecosystem services in the RA area?                                                                                      | Yes                                                 | If established it may reduce native trout                                                                                                                                                                        | Medium    |
| 20                                             | 4.07 | Is it likely that the taxon will host, and/or act as a vector for, recognised pests and infectious agents that are endemic in the RA area?                              | No                                                  | no such parasites/infectious agents are known                                                                                                                                                                    | Low       |
| 21                                             | 4.08 | Is it likely that the taxon will host, and/or act as a vector for, recognised pests and infectious agents that are absent from (novel to) the RA area?                  | Yes                                                 | Ryan, C. 2014. "Salmo trutta" (On-line), Animal Diversity Web. Accessed November 12, 2021 at <a href="https://animaldiversity.org/accounts/Salmo_trutta/">https://animaldiversity.org/accounts/Salmo_trutta/</a> | High      |
| 22                                             | 4.09 | Is it likely that the taxon will achieve a body size that will make it more likely to be released from captivity?                                                       | Yes                                                 | Species can attain large enough size to make it easy to keep in captivity. Although in most cases large specimens are used for commercial purposes                                                               | Low       |

|                                 |      |                                                                                                                                                                              |     |                                                                                                                                                                                                                                                                                                                                                         |           |
|---------------------------------|------|------------------------------------------------------------------------------------------------------------------------------------------------------------------------------|-----|---------------------------------------------------------------------------------------------------------------------------------------------------------------------------------------------------------------------------------------------------------------------------------------------------------------------------------------------------------|-----------|
| 23                              | 4.10 | Is the taxon capable of sustaining itself in a range of water velocity conditions (e.g. versatile in habitat use)?                                                           | Yes | Ryan, C. 2014. "Salmo trutta" (On-line), Animal Diversity Web. Accessed November 12, 2021 at <a href="https://animaldiversity.org/accounts/Salmo_trutta/">https://animaldiversity.org/accounts/Salmo_trutta/</a>                                                                                                                                        | Very high |
| 24                              | 4.11 | Is it likely that the taxon's mode of existence (e.g. excretion of by-products) or behaviours (e.g. feeding) will reduce habitat quality for native taxa?                    | Yes | Ryan, C. 2014. "Salmo trutta" (On-line), Animal Diversity Web. Accessed November 12, 2021 at <a href="https://animaldiversity.org/accounts/Salmo_trutta/">https://animaldiversity.org/accounts/Salmo_trutta/</a>                                                                                                                                        | Low       |
| 25                              | 4.12 | Is the taxon likely to maintain a viable population even when present in low densities (or persisting in adverse conditions by way of a dormant form)?                       | No  | No documented evidence                                                                                                                                                                                                                                                                                                                                  | Low       |
| <b>5. Resource exploitation</b> |      |                                                                                                                                                                              |     |                                                                                                                                                                                                                                                                                                                                                         |           |
| 26                              | 5.01 | Is the taxon likely to consume threatened or protected native taxa in the RA area?                                                                                           | Yes | Invertebrates                                                                                                                                                                                                                                                                                                                                           | Low       |
| 27                              | 5.02 | Is the taxon likely to sequester food resources (including nutrients) to the detriment of native taxa in the RA area?                                                        | No  | For a native trout                                                                                                                                                                                                                                                                                                                                      | High      |
| <b>6. Reproduction</b>          |      |                                                                                                                                                                              |     |                                                                                                                                                                                                                                                                                                                                                         |           |
| 28                              | 6.01 | Is the taxon likely to exhibit parental care and/or to reduce age-at-maturity in response to environmental conditions?                                                       | Yes | The female display provisional parental care on eggs and can also change the age-at-maturity in response to environmental conditions - Ryan, C. 2014. "Salmo trutta" (On-line), Animal Diversity Web. Accessed November 12, 2021 at <a href="https://animaldiversity.org/accounts/Salmo_trutta/">https://animaldiversity.org/accounts/Salmo_trutta/</a> | Medium    |
| 29                              | 6.02 | Is the taxon likely to produce viable gametes or propagules (in the RA area)?                                                                                                | No  | No documented evidence                                                                                                                                                                                                                                                                                                                                  | Medium    |
| 30                              | 6.03 | Is the taxon likely to hybridise naturally with native taxa?                                                                                                                 | Yes | Expected, not well documented                                                                                                                                                                                                                                                                                                                           | Low       |
| 31                              | 6.04 | Is the taxon likely to be hermaphroditic or to display asexual reproduction?                                                                                                 | No  | no such an evidence exists                                                                                                                                                                                                                                                                                                                              | High      |
| 32                              | 6.05 | Is the taxon dependent on the presence of another taxon (or specific habitat features) to complete its life cycle?                                                           | No  | No such an evidence exists                                                                                                                                                                                                                                                                                                                              | High      |
| 33                              | 6.06 | Is the taxon known (or likely) to produce a large number of propagules or offspring within a short time span (e.g. < 1 year)?                                                | No  | Ryan, C. 2014. "Salmo trutta" (On-line), Animal Diversity Web. Accessed November 12, 2021 at <a href="https://animaldiversity.org/accounts/Salmo_trutta/">https://animaldiversity.org/accounts/Salmo_trutta/</a>                                                                                                                                        | High      |
| 34                              | 6.07 | How many time units (days, months, years) does the taxon require to reach the age-at-first-reproduction?                                                                     | 1   | years                                                                                                                                                                                                                                                                                                                                                   | Very high |
| <b>7. Dispersal mechanisms</b>  |      |                                                                                                                                                                              |     |                                                                                                                                                                                                                                                                                                                                                         |           |
| 35                              | 7.01 | How many potential internal vectors/pathways could the taxon use to disperse within the RA area (with suitable vectors/pathways)?                                            | > 1 | Recreational and aquacultural purpose                                                                                                                                                                                                                                                                                                                   | High      |
| 36                              | 7.02 | Will any of these vectors/pathways bring the taxon in close proximity to one or more protected areas (e.g. MCZ, MPA, SSSI)?                                                  | Yes | Colchis protected areas along the Black Sea                                                                                                                                                                                                                                                                                                             | High      |
| 37                              | 7.03 | Does the taxon have a means of actively attaching itself to hard substrata (e.g. ship hulls, pilings, buoys) such that it enhances the likelihood of dispersal?              | No  | No such an evidence exists                                                                                                                                                                                                                                                                                                                              | Very high |
| 38                              | 7.04 | Is natural dispersal of the taxon likely to occur as eggs (for animals) or as propagules (for plants: seeds, spores) in the RA area?                                         | No  | Not expected                                                                                                                                                                                                                                                                                                                                            | Very high |
| 39                              | 7.05 | Is natural dispersal of the taxon likely to occur as larvae/juveniles (for animals) or as fragments/seedlings (for plants) in the RA area?                                   | Yes | Species is anadromous                                                                                                                                                                                                                                                                                                                                   | Medium    |
| 40                              | 7.06 | Are older life stages of the taxon likely to migrate in the RA area for reproduction?                                                                                        | Yes | Ryan, C. 2014. "Salmo trutta" (On-line), Animal Diversity Web. Accessed November 12, 2021 at <a href="https://animaldiversity.org/accounts/Salmo_trutta/">https://animaldiversity.org/accounts/Salmo_trutta/</a>                                                                                                                                        | Low       |
| 41                              | 7.07 | Are propagules or eggs of the taxon likely to be dispersed in the RA area by other animals?                                                                                  | No  | No such an evidence exists                                                                                                                                                                                                                                                                                                                              | Very high |
| 42                              | 7.08 | Is dispersal of the taxon along any of the vectors/pathways mentioned in the previous seven questions (35-41; i.e. both unintentional or intentional) likely to be           | Yes | Can be released intentionally or unintentionally with large quantity                                                                                                                                                                                                                                                                                    | Very high |
| 43                              | 7.09 | Is dispersal of the taxon density dependent?                                                                                                                                 | No  | No evidence for that                                                                                                                                                                                                                                                                                                                                    | Medium    |
| <b>8. Tolerance attributes</b>  |      |                                                                                                                                                                              |     |                                                                                                                                                                                                                                                                                                                                                         |           |
| 44                              | 8.01 | Is the taxon able to withstand being out of water for extended periods (e.g. minimum of one or more hours) at some stage of its life cycle?                                  | No  | Not expected as with other salmonids                                                                                                                                                                                                                                                                                                                    | High      |
| 45                              | 8.02 | Is the taxon tolerant of a wide range of water quality conditions relevant to that taxon? [In the Justification field, indicate the relevant water quality variable(s) being | No  | Ryan, C. 2014. "Salmo trutta" (On-line), Animal Diversity Web. Accessed November 12, 2021 at <a href="https://animaldiversity.org/accounts/Salmo_trutta/">https://animaldiversity.org/accounts/Salmo_trutta/</a>                                                                                                                                        | High      |
| 46                              | 8.03 | Can the taxon be controlled or eradicated in the wild with chemical, biological, or other agents/means?                                                                      | No  | Not a documented evidence                                                                                                                                                                                                                                                                                                                               | Low       |
| 47                              | 8.04 | Is the taxon likely to tolerate or benefit from environmental/human disturbance?                                                                                             | No  | Ryan, C. 2014. "Salmo trutta" (On-line), Animal Diversity Web. Accessed November 12, 2021 at <a href="https://animaldiversity.org/accounts/Salmo_trutta/">https://animaldiversity.org/accounts/Salmo_trutta/</a>                                                                                                                                        | High      |
| 48                              | 8.05 | Is the taxon able to tolerate salinity levels that are higher or lower than those found in its usual environment?                                                            | No  | No such an evidence exists                                                                                                                                                                                                                                                                                                                              | High      |

|                          |      |                                                                                                                                                              |           |                                                                  |        |
|--------------------------|------|--------------------------------------------------------------------------------------------------------------------------------------------------------------|-----------|------------------------------------------------------------------|--------|
| 49                       | 8.06 | Are there effective natural enemies (predators) of the taxon present in the RA                                                                               | No        | Not known any species that can act as an effective natural enemy | High   |
| <b>C. Climate change</b> |      |                                                                                                                                                              |           |                                                                  |        |
| <b>9. Climate change</b> |      |                                                                                                                                                              |           |                                                                  |        |
| 50                       | 9.01 | Under the predicted future climatic conditions, are the risks of entry into the RA area posed by the taxon likely to increase, decrease or not change?       | No change | Not enough information, based on professional judgment           | Low    |
| 51                       | 9.02 | Under the predicted future climatic conditions, are the risks of establishment posed by the taxon likely to increase, decrease or not change?                | No change | Based on professional judgment                                   | Low    |
| 52                       | 9.03 | Under the predicted future climatic conditions, are the risks of dispersal within the RA area posed by the taxon likely to increase, decrease or not change? | No change | Based on professional judgment                                   | Low    |
| 53                       | 9.04 | Under the predicted future climatic conditions, what is the likely magnitude of future potential impacts on biodiversity and/or ecological integrity/status? | Higher    | Based on professional judgment                                   | Medium |
| 54                       | 9.05 | Under the predicted future climatic conditions, what is the likely magnitude of future potential impacts on ecosystem structure and/or function?             | Higher    | Based on professional judgment                                   | Medium |
| 55                       | 9.06 | Under the predicted future climatic conditions, what is the likely magnitude of future potential impacts on ecosystem services/socio-economic factors?       | Higher    | Based on professional judgment                                   | Medium |

| Statistics                                     |             |
|------------------------------------------------|-------------|
| Scores                                         |             |
| <b>BRA</b>                                     | <b>34.0</b> |
| <b>BRA Outcome</b>                             | <b>-</b>    |
| <b>BRA+CCA</b>                                 | <b>40.0</b> |
| <b>BRA+CCA Outcome</b>                         | <b>-</b>    |
| Score partition                                |             |
| <b>A. Biogeography/Historical</b>              | <b>20.0</b> |
| 1. Domestication/Cultivation                   | 4.0         |
| 2. Climate, distribution and introduction risk | 2.0         |
| 3. Invasive elsewhere                          | 14.0        |
| <b>B. Biology/Ecology</b>                      | <b>14.0</b> |
| 4. Undesirable (or persistence) traits         | 6.0         |
| 5. Resource exploitation                       | 5.0         |
| 6. Reproduction                                | 3.0         |
| 7. Dispersal mechanisms                        | 2.0         |
| 8. Tolerance attributes                        | -2.0        |
| <b>C. Climate change</b>                       | <b>6.0</b>  |
| 9. Climate change                              | 6.0         |
| Answered Questions                             |             |
| <b>Total</b>                                   | <b>55</b>   |
| <b>A. Biogeography/Historical</b>              | <b>13</b>   |
| 1. Domestication/Cultivation                   | 3           |
| 2. Climate, distribution and introduction risk | 5           |
| 3. Invasive elsewhere                          | 5           |
| <b>B. Biology/Ecology</b>                      | <b>36</b>   |
| 4. Undesirable (or persistence) traits         | 12          |
| 5. Resource exploitation                       | 2           |
| 6. Reproduction                                | 7           |
| 7. Dispersal mechanisms                        | 9           |
| 8. Tolerance attributes                        | 6           |
| <b>C. Climate change</b>                       | <b>6</b>    |
| 9. Climate change                              | 6           |
| Sectors affected                               |             |
| <b>Commercial</b>                              | <b>17</b>   |
| <b>Environmental</b>                           | <b>17</b>   |
| <b>Species or population nuisance traits</b>   | <b>11</b>   |

| Thresholds     |             |
|----------------|-------------|
| <b>BRA</b>     | <b>-</b>    |
| <b>BRA+CCA</b> | <b>-</b>    |
| Confidence     |             |
| <b>BRA+CCA</b> | <b>0.58</b> |
| <b>BRA</b>     | <b>0.61</b> |
| <b>CCA</b>     | <b>0.38</b> |

| Date and Time       |
|---------------------|
| 16/05/2022 22:44:30 |

## AS-ISK v2

| Taxon and Assessor details         |                                                                                                                   |
|------------------------------------|-------------------------------------------------------------------------------------------------------------------|
| Category                           | Fishes and Lampreys (freshwater)                                                                                  |
| Taxon name                         | <i>Salmo trutta</i>                                                                                               |
| Common name                        | brown trout                                                                                                       |
| Assessor                           | Giorgi Epitashvili                                                                                                |
| Risk screening context             |                                                                                                                   |
| Reason and socio-economic benefits | Brown trout have been widely introduced into suitable environments around the world, including                    |
| Risk assessment area               | South Caucasus                                                                                                    |
| Taxonomy                           | <i>Salmo trutta</i> Linnaeus 1758                                                                                 |
| Native range                       | Europe and Asia: Atlantic, North, White and Baltic Sea basins, from Spain to Chosha Bay (Russia).                 |
| Introduced range                   | Brown trout have been widely introduced into suitable environments around the world, including                    |
| URL                                | <a href="https://www.fishbase.se/summary/Salmo-trutta.html">https://www.fishbase.se/summary/Salmo-trutta.html</a> |

|                                                |      | Response                                                                                                                                                                | Justification (references and/or other information) | Confidence                                                                                                                                                                                                                                                                                                                                                                                                                                                    |           |
|------------------------------------------------|------|-------------------------------------------------------------------------------------------------------------------------------------------------------------------------|-----------------------------------------------------|---------------------------------------------------------------------------------------------------------------------------------------------------------------------------------------------------------------------------------------------------------------------------------------------------------------------------------------------------------------------------------------------------------------------------------------------------------------|-----------|
| A. Biogeography/Historical                     |      |                                                                                                                                                                         |                                                     |                                                                                                                                                                                                                                                                                                                                                                                                                                                               |           |
| 1. Domestication/Cultivation                   |      |                                                                                                                                                                         |                                                     |                                                                                                                                                                                                                                                                                                                                                                                                                                                               |           |
| 1                                              | 1.01 | Has the taxon been the subject of domestication (or cultivation) for at least 20 generations?                                                                           | Yes                                                 | According to FAO aquaculture production statistics (which amalgamate the production of all morphs of <i>Salmo trutta</i> under the statistical category of 'sea trout'), the main producers (>100 tonnes/year) of <i>Salmo trutta</i> in sea water or freshwater in 2010 were the Russian Federation (80 percent of the global total, almost all in freshwater), Italy, Romania, France, the United Kingdom, Germany, Denmark and Bosnia and Herzegovina      | Very high |
| 2                                              | 1.02 | Is the taxon harvested in the wild and likely to be sold or used in its live form?                                                                                      | Yes                                                 | Sea trout are almost exclusively produced in intensive monoculture systems. The only variations are linked to broodstock supply (wild or farmed) and the age at which the product is sold (eggs, swim-up fry, fingerlings, pan-size fish). Seed supply is an important component of sea trout culture because an important part of the production output is sold as eggs, fry or fingerlings. Broodstock may be domesticated (originating from cultured fish) | Very high |
| 3                                              | 1.03 | Does the taxon have invasive races, varieties, sub-taxa or congeners?                                                                                                   | Yes                                                 | In North America Brown trout is considered as invasive in many places as it can out-compete local species like brook trout ( <i>Salvelinus fontinalis</i> ).                                                                                                                                                                                                                                                                                                  | Very high |
| 2. Climate, distribution and introduction risk |      |                                                                                                                                                                         |                                                     |                                                                                                                                                                                                                                                                                                                                                                                                                                                               |           |
| 4                                              | 2.01 | How similar are the climatic conditions of the Risk Assessment (RA) area and the taxon's native range?                                                                  | High                                                | Köppen-Geiger climate classification map                                                                                                                                                                                                                                                                                                                                                                                                                      | High      |
| 5                                              | 2.02 | What is the quality of the climate matching data?                                                                                                                       | High                                                | Köppen-Geiger climate classification map                                                                                                                                                                                                                                                                                                                                                                                                                      | High      |
| 6                                              | 2.03 | Is the taxon already present outside of captivity in the RA area?                                                                                                       | Yes                                                 | European brown trout is found in some rivers of the Caspian and the Black Sea basins (Ninua et al. 20218).                                                                                                                                                                                                                                                                                                                                                    | Very high |
| 7                                              | 2.04 | How many potential vectors could the taxon use to enter in the RA area?                                                                                                 | One                                                 | This species enters the region for aquaculture purposes                                                                                                                                                                                                                                                                                                                                                                                                       | High      |
| 8                                              | 2.05 | Is the taxon currently found in close proximity to, and likely to enter into, the RA area in the near future (e.g. unintentional and intentional introductions)?        | No                                                  | Data deficient                                                                                                                                                                                                                                                                                                                                                                                                                                                | Low       |
| 3. Invasive elsewhere                          |      |                                                                                                                                                                         |                                                     |                                                                                                                                                                                                                                                                                                                                                                                                                                                               |           |
| 9                                              | 3.01 | Has the taxon become naturalised (established viable populations) outside its                                                                                           | Yes                                                 | Introduced brown trout have established self-sustaining, wild populations in many introduced countries.                                                                                                                                                                                                                                                                                                                                                       | Very high |
| 10                                             | 3.02 | In the taxon's introduced range, are there known adverse impacts to wild stocks or commercial taxa?                                                                     | Yes                                                 | Brown trout have had serious negative impacts on upland native fish species in some of the countries where they have been introduced, particularly Australia.                                                                                                                                                                                                                                                                                                 | Very high |
| 11                                             | 3.03 | In the taxon's introduced range, are there known adverse impacts to aquaculture?                                                                                        | No                                                  | Data deficient                                                                                                                                                                                                                                                                                                                                                                                                                                                | Low       |
| 12                                             | 3.04 | In the taxon's introduced range, are there known adverse impacts to ecosystem                                                                                           | Yes                                                 | Acoording to cabi.org: Impact Summary of <i>S. trutta</i> : Impact on Fisheries / aquaculture - Positive; impact on Tourism - Positive                                                                                                                                                                                                                                                                                                                        | Low       |
| 13                                             | 3.05 | In the taxon's introduced range, are there known adverse socio-economic impacts?                                                                                        | Yes                                                 | According to cabi.org: Impact Summary of <i>S. trutta</i> : Impact on Fisheries / aquaculture - Positive; impact on Tourism - Positive                                                                                                                                                                                                                                                                                                                        | Low       |
| B. Biology/Ecology                             |      |                                                                                                                                                                         |                                                     |                                                                                                                                                                                                                                                                                                                                                                                                                                                               |           |
| 4. Undesirable (or persistence) traits         |      |                                                                                                                                                                         |                                                     |                                                                                                                                                                                                                                                                                                                                                                                                                                                               |           |
| 14                                             | 4.01 | Is it likely that the taxon will be poisonous or pose other risks to human health?                                                                                      | No                                                  | This species does not pose a threat to humans.                                                                                                                                                                                                                                                                                                                                                                                                                | High      |
| 15                                             | 4.02 | Is it likely that the taxon will smother one or more native taxa (that are not threatened or protected)?                                                                | Yes                                                 | Brown trout <i>Salmo trutta</i> were introduced to New Zealand in 1867. Successful establishment was broadly predictable in terms both of the characteristics of brown trout and of the receiving community. There is evidence of impacts of brown trout on the abundance of some native fish and invertebrates, and brown trout have been responsible for the local extinction and fragmentation of certain species (Townsend 1996).                         | Very high |
| 16                                             | 4.03 | Are there any threatened or protected taxa that the non-native taxon would parasitise in the RA area?                                                                   | Yes                                                 | There are meny protected and threatened species in the SC region which can be hunted by <i>S. trutta</i> : <i>Salmo labrax</i> , <i>Salmo caspius</i> , <i>Salmo ischchan</i> , <i>Acipenser</i> spp, etc.                                                                                                                                                                                                                                                    | Very high |
| 17                                             | 4.04 | Is the taxon adaptable in terms of climatic and other environmental conditions, thus enhancing its potential persistence if it has invaded or could invade the RA area? | Yes                                                 | Own judgement                                                                                                                                                                                                                                                                                                                                                                                                                                                 | High      |

|                                 |      |                                                                                                                                                                 |     |                                                                                                                                                                                                                                                                                                                                                                                                                                                                                                               |           |
|---------------------------------|------|-----------------------------------------------------------------------------------------------------------------------------------------------------------------|-----|---------------------------------------------------------------------------------------------------------------------------------------------------------------------------------------------------------------------------------------------------------------------------------------------------------------------------------------------------------------------------------------------------------------------------------------------------------------------------------------------------------------|-----------|
| 18                              | 4.05 | Is the taxon likely to disrupt food-web structure/function in aquatic ecosystems if it has invaded or is likely to invade the RA area?                          | Yes | This is to be expected. For instance in New Zealand Brown trout may profoundly affect the functioning of stream communities, reducing the abundance of grazing invertebrates and altering their grazing behaviour so that algal biomass increases. A trophic cascade was predictable on the basis of the attributes of the invader and of the stream community. Brown trout seem to have been responsible for the evolution among invertebrates of novel anti-predator behaviours with far-reaching community | Very high |
| 19                              | 4.06 | Is the taxon likely to exert adverse impacts on ecosystem services in the RA area?                                                                              | Yes | This is to be expected if the species is distributed in the region.                                                                                                                                                                                                                                                                                                                                                                                                                                           | Medium    |
| 20                              | 4.07 | Is it likely that the taxon will host, and/or act as a vector for, recognised pests and infectious agents that are endemic in the RA                            | Yes | This is to be expected if the species is distributed in the region.                                                                                                                                                                                                                                                                                                                                                                                                                                           | Medium    |
| 21                              | 4.08 | Is it likely that the taxon will host, and/or act as a vector for, recognised pests and infectious agents that are absent from (novel to) the RA area?          | Yes | Data deficient                                                                                                                                                                                                                                                                                                                                                                                                                                                                                                | Low       |
| 22                              | 4.09 | Is it likely that the taxon will achieve a body size that will make it more likely to be released from captivity?                                               | Yes | Max length of <i>S. trutta</i> is 140 cm SL male/unsexed; common length : 72.0 cm TL male/unsexed; max. published weight: 50.0 kg. Therefore, <i>S. trutta</i> is one of the most widely used species in                                                                                                                                                                                                                                                                                                      | Very high |
| 23                              | 4.10 | Is the taxon capable of sustaining itself in a range of water velocity conditions (e.g. versatile in habitat use)?                                              | Yes | <i>S. trutta</i> found in streams, ponds, rivers and lakes (Scott & Scott, 1988). Individuals spend 1 to 5 years in fresh water and 6 months to 5 years in salt water.                                                                                                                                                                                                                                                                                                                                        | Very high |
| 24                              | 4.11 | Is it likely that the taxon's mode of existence (e.g. excretion of by-products) or behaviours (e.g. feeding) will reduce habitat quality for native taxa?       | No  | Data deficient                                                                                                                                                                                                                                                                                                                                                                                                                                                                                                | Low       |
| 25                              | 4.12 | Is the taxon likely to maintain a viable population even when present in low densities (or persisting in adverse conditions by way of a dormant form)?          | No  | Data deficient                                                                                                                                                                                                                                                                                                                                                                                                                                                                                                | Low       |
| <b>5. Resource exploitation</b> |      |                                                                                                                                                                 |     |                                                                                                                                                                                                                                                                                                                                                                                                                                                                                                               |           |
| 26                              | 5.01 | Is the taxon likely to consume threatened or protected native taxa in the RA area?                                                                              | Yes | <i>S. trutta</i> is a predator fish and probability of this is high if the species is distributed in the SC region. Local threatened/protected species such as <i>Salmo</i> spp, <i>Acipenser</i> spp, <i>Luciobarbus capito</i> , etc. will be in danger.                                                                                                                                                                                                                                                    | High      |
| 27                              | 5.02 | Is the taxon likely to sequester food resources (including nutrients) to the detriment of native taxa in the RA area?                                           | Yes | <i>S. trutta</i> is a predator fish and probability of this is high if the species is distributed in the SC region.                                                                                                                                                                                                                                                                                                                                                                                           | High      |
| <b>6. Reproduction</b>          |      |                                                                                                                                                                 |     |                                                                                                                                                                                                                                                                                                                                                                                                                                                                                                               |           |
| 28                              | 6.01 | Is the taxon likely to exhibit parental care and/or to reduce age-at-maturity in response to environmental conditions?                                          | Yes | The fact that brown trout eggs can be cannibalised by peripheral individuals just after spawning suggests that dominant males would benefit from protecting their offspring by keeping cannibals away from the nest (Tentelier et al. 2011).                                                                                                                                                                                                                                                                  | High      |
| 29                              | 6.02 | Is the taxon likely to produce viable gametes or propagules (in the RA area)?                                                                                   | No  | Such a fact is not documented                                                                                                                                                                                                                                                                                                                                                                                                                                                                                 | Low       |
| 30                              | 6.03 | Is the taxon likely to hybridise naturally with native taxa?                                                                                                    | Yes | Hybrids between native white-spotted charr <i>Salvelinus leucomaenis</i> and non-native brown trout <i>Salmo trutta</i> were identified in streams of Hokkaido, Japan, using both appearance and genetic characters. The DNA analyses indicated that the specimens were hybrids between female <i>S. leucomaenis</i> and male <i>S. trutta</i> . Occurrence of such hybrids implies increased mating opportunities between these species in wild streams (Kitano et al.                                       | Very high |
| 31                              | 6.04 | Is the taxon likely to be hermaphroditic or to display asexual reproduction?                                                                                    | No  | Data deficient                                                                                                                                                                                                                                                                                                                                                                                                                                                                                                | Low       |
| 32                              | 6.05 | Is the taxon dependent on the presence of another taxon (or specific habitat features) to complete its life cycle?                                              | Yes | Lacustrine populations of <i>S. trutta</i> undertake migration to tributaries and lake outlets to spawn, rarely spawning on stone, wave-washed lake shores. Spawns in rivers and streams with swift current, usually characterized by downward movement of water                                                                                                                                                                                                                                              | Medium    |
| 33                              | 6.06 | Is the taxon known (or likely) to produce a large number of propagules or offspring within a short time span (e.g. < 1 year)?                                   | No  | Juveniles mature in 3-4 years and each female produces about 10.000 eggs.                                                                                                                                                                                                                                                                                                                                                                                                                                     | Medium    |
| 34                              | 6.07 | How many time units (days, months, years) does the taxon require to reach the age-at-first-reproduction?                                                        | 3   | <i>S. trutta</i> mature in 3-4 years (Hart, 1973).                                                                                                                                                                                                                                                                                                                                                                                                                                                            | Very high |
| <b>7. Dispersal mechanisms</b>  |      |                                                                                                                                                                 |     |                                                                                                                                                                                                                                                                                                                                                                                                                                                                                                               |           |
| 35                              | 7.01 | How many potential internal vectors/pathways could the taxon use to disperse within the RA area (with suitable                                                  | One | This species may be distributed in the region through translocation.                                                                                                                                                                                                                                                                                                                                                                                                                                          | High      |
| 36                              | 7.02 | Will any of these vectors/pathways bring the taxon in close proximity to one or more protected areas (e.g. MCZ, MPA, SSSI)?                                     | Yes | There is a possibility of that if the species distributed in the region.                                                                                                                                                                                                                                                                                                                                                                                                                                      | High      |
| 37                              | 7.03 | Does the taxon have a means of actively attaching itself to hard substrata (e.g. ship hulls, pilings, buoys) such that it enhances the likelihood of dispersal? | No  | This species does not have a similar means                                                                                                                                                                                                                                                                                                                                                                                                                                                                    | Very high |
| 38                              | 7.04 | Is natural dispersal of the taxon likely to occur as eggs (for animals) or as propagules (for plants: seeds, spores) in the RA area?                            | No  | No such fact has been documented                                                                                                                                                                                                                                                                                                                                                                                                                                                                              | Medium    |
| 39                              | 7.05 | Is natural dispersal of the taxon likely to occur as larvae/juveniles (for animals) or as fragments/seedlings (for plants) in the RA area?                      | No  | No such fact has been documented                                                                                                                                                                                                                                                                                                                                                                                                                                                                              | Medium    |
| 40                              | 7.06 | Are older life stages of the taxon likely to migrate in the RA area for reproduction?                                                                           | No  | No such fact has been documented                                                                                                                                                                                                                                                                                                                                                                                                                                                                              | Medium    |



|                                |      |                                                                                                                                                                                           |           |                                                                                                                                                                                                                                                                                                                                                                                                                                                                                                                                                                                                                                                                                                                        |           |
|--------------------------------|------|-------------------------------------------------------------------------------------------------------------------------------------------------------------------------------------------|-----------|------------------------------------------------------------------------------------------------------------------------------------------------------------------------------------------------------------------------------------------------------------------------------------------------------------------------------------------------------------------------------------------------------------------------------------------------------------------------------------------------------------------------------------------------------------------------------------------------------------------------------------------------------------------------------------------------------------------------|-----------|
| 41                             | 7.07 | Are propagules or eggs of the taxon likely to be dispersed in the RA area by other animals?                                                                                               | No        | No such fact has been documented                                                                                                                                                                                                                                                                                                                                                                                                                                                                                                                                                                                                                                                                                       | Medium    |
| 42                             | 7.08 | Is dispersal of the taxon along any of the vectors/pathways mentioned in the previous seven questions (35–41; i.e. both unintentional or intentional) likely to be                        | Yes       | Data deficient                                                                                                                                                                                                                                                                                                                                                                                                                                                                                                                                                                                                                                                                                                         | Low       |
| 43                             | 7.09 | Is dispersal of the taxon density dependent?                                                                                                                                              | No        | Data deficient                                                                                                                                                                                                                                                                                                                                                                                                                                                                                                                                                                                                                                                                                                         | Medium    |
| <b>8. Tolerance attributes</b> |      |                                                                                                                                                                                           |           |                                                                                                                                                                                                                                                                                                                                                                                                                                                                                                                                                                                                                                                                                                                        |           |
| 44                             | 8.01 | Is the taxon able to withstand being out of water for extended periods (e.g. minimum of one or more hours) at some stage of its life cycle?                                               | No        | No such fact has been detected                                                                                                                                                                                                                                                                                                                                                                                                                                                                                                                                                                                                                                                                                         | Very high |
| 45                             | 8.02 | Is the taxon tolerant of a wide range of water quality conditions relevant to that taxon? [In the Justification field, indicate the relevant water quality variable(s) being considered.] | Yes       | Found in streams, ponds, rivers and lakes. Individuals spend 1 to 5 years in fresh water and 6 months to 5 years in salt water. Juveniles mature in 3–4 years. Lacustrine populations undertake migration to tributaries and lake outlets to spawn, rarely spawning on stone, wave-washed lake shores. Spawns in rivers and streams with swift current, usually characterized by downward movement of water into gravel. Spawning takes place normally more than one time. They prefer cold, well-oxygenated upland waters although their tolerance limits are lower than those of rainbow trout and favors large streams in the mountainous areas with adequate cover in the form of submerged rocks, undercut banks. | Very high |
| 46                             | 8.03 | Can the taxon be controlled or eradicated in the wild with chemical, biological, or other agents/means?                                                                                   | Yes       | No research has been conducted in this direction.                                                                                                                                                                                                                                                                                                                                                                                                                                                                                                                                                                                                                                                                      | Medium    |
| 47                             | 8.04 | Is the taxon likely to tolerate or benefit from environmental/human disturbance?                                                                                                          | Yes       | In many countries and areas this species distributed through humans                                                                                                                                                                                                                                                                                                                                                                                                                                                                                                                                                                                                                                                    | High      |
| 48                             | 8.05 | Is the taxon able to tolerate salinity levels that are higher or lower than those found in its usual environment?                                                                         | Yes       | S. trutta individuals spend 1 to 5 years in fresh water and 6 months to 5 years in salt water.                                                                                                                                                                                                                                                                                                                                                                                                                                                                                                                                                                                                                         | Very high |
| 49                             | 8.06 | Are there effective natural enemies (predators) of the taxon present in the RA area?                                                                                                      | Yes       | There are several predators in the SC region which can control the populations of S. trutta, e.g. Salmo spp, Squalius spp, Esox lucius, Sander lucioperca, etc.                                                                                                                                                                                                                                                                                                                                                                                                                                                                                                                                                        | High      |
| <b>C. Climate change</b>       |      |                                                                                                                                                                                           |           |                                                                                                                                                                                                                                                                                                                                                                                                                                                                                                                                                                                                                                                                                                                        |           |
| <b>9. Climate change</b>       |      |                                                                                                                                                                                           |           |                                                                                                                                                                                                                                                                                                                                                                                                                                                                                                                                                                                                                                                                                                                        |           |
| 50                             | 9.01 | Under the predicted future climatic conditions, are the risks of entry into the RA area posed by the taxon likely to increase, decrease or not change?                                    | Increase  | The entry of this species into the region depends on the human                                                                                                                                                                                                                                                                                                                                                                                                                                                                                                                                                                                                                                                         | Low       |
| 51                             | 9.02 | Under the predicted future climatic conditions, are the risks of establishment posed by the taxon likely to increase, decrease or not change?                                             | Increase  | The establishment of this species into the region will probably growth                                                                                                                                                                                                                                                                                                                                                                                                                                                                                                                                                                                                                                                 | Low       |
| 52                             | 9.03 | Under the predicted future climatic conditions, are the risks of dispersal within the RA area posed by the taxon likely to increase, decrease or not change?                              | Increase  | The disperse of this species in the South Caucasus depends on the human and further development of the aquaculture in the region.                                                                                                                                                                                                                                                                                                                                                                                                                                                                                                                                                                                      | Low       |
| 53                             | 9.04 | Under the predicted future climatic conditions, what is the likely magnitude of future potential impacts on biodiversity and/or ecological integrity/status?                              | No change | Own judgement                                                                                                                                                                                                                                                                                                                                                                                                                                                                                                                                                                                                                                                                                                          | Low       |
| 54                             | 9.05 | Under the predicted future climatic conditions, what is the likely magnitude of future potential impacts on ecosystem structure and/or function?                                          | No change | Own judgement                                                                                                                                                                                                                                                                                                                                                                                                                                                                                                                                                                                                                                                                                                          | Low       |
| 55                             | 9.06 | Under the predicted future climatic conditions, what is the likely magnitude of future potential impacts on ecosystem services/socio-economic factors?                                    | Lower     | Own judgement                                                                                                                                                                                                                                                                                                                                                                                                                                                                                                                                                                                                                                                                                                          | Low       |

| Statistics                                     |             |
|------------------------------------------------|-------------|
| Scores                                         |             |
| <b>BRA</b>                                     | <b>35.0</b> |
| <b>BRA Outcome</b>                             | <b>-</b>    |
| <b>BRA+CCA</b>                                 | <b>39.0</b> |
| <b>BRA+CCA Outcome</b>                         | <b>-</b>    |
| Score partition                                |             |
| <b>A. Biogeography/Historical</b>              | <b>19.0</b> |
| 1. Domestication/Cultivation                   | 4.0         |
| 2. Climate, distribution and introduction risk | 1.0         |
| 3. Invasive elsewhere                          | 14.0        |
| <b>B. Biology/Ecology</b>                      | <b>16.0</b> |
| 4. Undesirable (or persistence) traits         | 9.0         |
| 5. Resource exploitation                       | 7.0         |
| 6. Reproduction                                | 0.0         |
| 7. Dispersal mechanisms                        | -3.0        |
| 8. Tolerance attributes                        | 3.0         |
| <b>C. Climate change</b>                       | <b>4.0</b>  |
| 9. Climate change                              | 4.0         |
| Answered Questions                             |             |
| <b>Total</b>                                   | <b>55</b>   |
| <b>A. Biogeography/Historical</b>              | <b>13</b>   |
| 1. Domestication/Cultivation                   | 3           |
| 2. Climate, distribution and introduction risk | 5           |

|                                              |           |
|----------------------------------------------|-----------|
| 3. Invasive elsewhere                        | 5         |
| <b>B. Biology / Ecology</b>                  | <b>36</b> |
| 4. Undesirable (or persistence) traits       | 12        |
| 5. Resource exploitation                     | 2         |
| 6. Reproduction                              | 7         |
| 7. Dispersal mechanisms                      | 9         |
| 8. Tolerance attributes                      | 6         |
| <b>C. Climate change</b>                     | <b>6</b>  |
| 9. Climate change                            | 6         |
| <b>Sectors affected</b>                      |           |
| Commercial                                   | 11        |
| Environmental                                | 12        |
| <b>Species or population nuisance traits</b> | <b>19</b> |

|                   |      |
|-------------------|------|
| <b>Thresholds</b> |      |
| BRA               | -    |
| BRA+CCA           | -    |
| <b>Confidence</b> |      |
| BRA+CCA           | 0.64 |
| BRA               | 0.68 |
| CCA               | 0.25 |

|                      |  |
|----------------------|--|
| <b>Date and Time</b> |  |
| 13/05/2022 18:12:22  |  |

## AS-ISK v2

| Taxon and Assessor details         |                                                                                                                   |
|------------------------------------|-------------------------------------------------------------------------------------------------------------------|
| Category                           | Fishes and Lampreys (freshwater)                                                                                  |
| Taxon name                         | <i>Salmo trutta</i>                                                                                               |
| Common name                        | brown trout                                                                                                       |
| Assessor                           | Tatia Kuljanishvili                                                                                               |
| Risk screening context             |                                                                                                                   |
| Reason and socio-economic benefits | Aquaculture important species introduced worldwide                                                                |
| Risk assessment area               | South Caucasus                                                                                                    |
| Taxonomy                           | Actinopteri (ray-finned fishes) > Salmoniformes (Salmons) > Salmonidae (Salmonids) >                              |
| Native range                       | Europe and Asia: Atlantic, North, White and Baltic Sea basins, from Spain to Chosha Bay                           |
| Introduced range                   | Widely introduced                                                                                                 |
| URL                                | <a href="https://www.fishbase.de/summary/Salmo-trutta.html">https://www.fishbase.de/summary/Salmo-trutta.html</a> |

|                                                |      |                                                                                                                                                                         | Response | Justification (references and/or other information)                                                                                                                                                                                                                                                                                                                                                                                                                                                                                                      | Confidence |
|------------------------------------------------|------|-------------------------------------------------------------------------------------------------------------------------------------------------------------------------|----------|----------------------------------------------------------------------------------------------------------------------------------------------------------------------------------------------------------------------------------------------------------------------------------------------------------------------------------------------------------------------------------------------------------------------------------------------------------------------------------------------------------------------------------------------------------|------------|
| A. Biogeography/Historical                     |      |                                                                                                                                                                         |          |                                                                                                                                                                                                                                                                                                                                                                                                                                                                                                                                                          |            |
| 1. Domestication/Cultivation                   |      |                                                                                                                                                                         |          |                                                                                                                                                                                                                                                                                                                                                                                                                                                                                                                                                          |            |
| 1                                              | 1.01 | Has the taxon been the subject of domestication (or cultivation) for at least 20 generations?                                                                           | Yes      | Sea trout is probably the first species of fish for which artificial reproduction was performed. This probably occurred in Germany around 1739 and the first sea trout hatchery was established in 1841 in the UK. The technique of artificial fertilization was optimized in the 1850s. Since then, sea trout has been produced extensively in Europe and introduced to all continents as a sport fish<br><a href="http://www.fao.org/fishery/culturedspecies/Salmo_trutta/en#tcNA">http://www.fao.org/fishery/culturedspecies/Salmo_trutta/en#tcNA</a> | Very high  |
| 2                                              | 1.02 | Is the taxon harvested in the wild and likely to be sold or used in its live form?                                                                                      | Yes      | Artificially spawned sea trout can be sold as fertilized eggs of fry.                                                                                                                                                                                                                                                                                                                                                                                                                                                                                    | High       |
| 3                                              | 1.03 | Does the taxon have invasive races, varieties, sub-taxa or congeners?                                                                                                   | Yes      | Examples: golden trout, brook trout, brown trout (Knapp 1996)                                                                                                                                                                                                                                                                                                                                                                                                                                                                                            | High       |
| 2. Climate, distribution and introduction risk |      |                                                                                                                                                                         |          |                                                                                                                                                                                                                                                                                                                                                                                                                                                                                                                                                          |            |
| 4                                              | 2.01 | How similar are the climatic conditions of the Risk Assessment (RA) area and the taxon's native range?                                                                  | Medium   | The climate is somehow similar                                                                                                                                                                                                                                                                                                                                                                                                                                                                                                                           | Medium     |
| 5                                              | 2.02 | What is the quality of the climate matching data?                                                                                                                       | Low      | Quality of climate matching data is low                                                                                                                                                                                                                                                                                                                                                                                                                                                                                                                  | High       |
| 6                                              | 2.03 | Is the taxon already present outside of captivity in the RA area?                                                                                                       | Yes      | Recorded from Armenian freshwaters                                                                                                                                                                                                                                                                                                                                                                                                                                                                                                                       | High       |
| 7                                              | 2.04 | How many potential vectors could the taxon use to enter in the RA area?                                                                                                 | > 1      | Aquaculture, intentional releases by local fishermen                                                                                                                                                                                                                                                                                                                                                                                                                                                                                                     | High       |
| 8                                              | 2.05 | Is the taxon currently found in close proximity to, and likely to enter into, the RA area in the near future (e.g. unintentional and intentional introductions)?        | Yes      | It is already found in Armenia and has been introduced in Georgia in the past                                                                                                                                                                                                                                                                                                                                                                                                                                                                            | High       |
| 3. Invasive elsewhere                          |      |                                                                                                                                                                         |          |                                                                                                                                                                                                                                                                                                                                                                                                                                                                                                                                                          |            |
| 9                                              | 3.01 | Has the taxon become naturalised (established viable populations) outside its introduced range?                                                                         | Yes      | Yes. For example North America                                                                                                                                                                                                                                                                                                                                                                                                                                                                                                                           | High       |
| 10                                             | 3.02 | In the taxon's introduced range, are there known adverse impacts to wild stocks or commercial taxa?                                                                     | Yes      | They usually selected native prey for example in Trinity River (California).                                                                                                                                                                                                                                                                                                                                                                                                                                                                             | Very high  |
| 11                                             | 3.03 | In the taxon's introduced range, are there known adverse impacts to aquaculture?                                                                                        | Yes      | They have been preying on aquaculture important fish                                                                                                                                                                                                                                                                                                                                                                                                                                                                                                     | High       |
| 12                                             | 3.04 | In the taxon's introduced range, are there known adverse impacts to ecosystem?                                                                                          | Yes      | Can be transmitting the diseases                                                                                                                                                                                                                                                                                                                                                                                                                                                                                                                         | Low        |
| 13                                             | 3.05 | In the taxon's introduced range, are there known adverse socio-economic impacts?                                                                                        | No       | It is not known                                                                                                                                                                                                                                                                                                                                                                                                                                                                                                                                          | Low        |
| B. Biology/Ecology                             |      |                                                                                                                                                                         |          |                                                                                                                                                                                                                                                                                                                                                                                                                                                                                                                                                          |            |
| 4. Undesirable (or persistence) traits         |      |                                                                                                                                                                         |          |                                                                                                                                                                                                                                                                                                                                                                                                                                                                                                                                                          |            |
| 14                                             | 4.01 | Is it likely that the taxon will be poisonous or pose other risks to human health?                                                                                      | No       | Not poisonous                                                                                                                                                                                                                                                                                                                                                                                                                                                                                                                                            | Very high  |
| 15                                             | 4.02 | Is it likely that the taxon will smother one or more native taxa (that are not threatened or protected)?                                                                | Yes      | introduced brown trout may negatively affect populations of native fishes in 39 areas where they have been introduced (Townsend, 1996; McHugh & Budy, 2006; Belk 40 et al., 2016; Hoxmeier & Dieterman, 2016)                                                                                                                                                                                                                                                                                                                                            | High       |
| 16                                             | 4.03 | Are there any threatened or protected taxa that the non-native taxon would parasitise in the RA area?                                                                   | No       | Does not parasite                                                                                                                                                                                                                                                                                                                                                                                                                                                                                                                                        | High       |
| 17                                             | 4.04 | Is the taxon adaptable in terms of climatic and other environmental conditions, thus enhancing its potential persistence if it has invaded or could invade the RA area? | Yes      | Found in streams, ponds, rivers and lakes (Ref. 5951). Individuals spend 1 to 5 years in fresh water and 6 months to 5 years in salt water (Ref. 51442).                                                                                                                                                                                                                                                                                                                                                                                                 | High       |
| 18                                             | 4.05 | Is the taxon likely to disrupt food-web structure/function in aquatic ecosystems if it has invaded or is likely to invade the RA area?                                  | Yes      | It can shape native fish community as well as amphibians, zooplankton and benthic macroinvertebrates.                                                                                                                                                                                                                                                                                                                                                                                                                                                    | High       |
| 19                                             | 4.06 | Is the taxon likely to exert adverse impacts on ecosystem services in the RA area?                                                                                      | No       | can be transmitting diseases                                                                                                                                                                                                                                                                                                                                                                                                                                                                                                                             | Low        |
| 20                                             | 4.07 | Is it likely that the taxon will host, and/or act as a vector for, recognised pests and infectious agents that are endemic in the RA area?                              | No       | No such information available.                                                                                                                                                                                                                                                                                                                                                                                                                                                                                                                           | Low        |
| 21                                             | 4.08 | Is it likely that the taxon will host, and/or act as a vector for, recognised pests and infectious agents that are absent from (novel to) the RA area?                  | Yes      | Likely, yes.                                                                                                                                                                                                                                                                                                                                                                                                                                                                                                                                             | Low        |

|                                 |      |                                                                                                                                                                              |     |                                                                                                                                                          |           |
|---------------------------------|------|------------------------------------------------------------------------------------------------------------------------------------------------------------------------------|-----|----------------------------------------------------------------------------------------------------------------------------------------------------------|-----------|
| 22                              | 4.09 | Is it likely that the taxon will achieve a body size that will make it more likely to be released from captivity?                                                            | Yes | Can grow up to 70 cm                                                                                                                                     | High      |
| 23                              | 4.10 | Is the taxon capable of sustaining itself in a range of water velocity conditions (e.g. versatile in habitat use)?                                                           | Yes | It can persist in both, standing and flowing rivers and lakes and the anadromous behaviour of the fish facilitates its dispersal upstreams.              | Very high |
| 24                              | 4.11 | Is it likely that the taxon's mode of existence (e.g. excretion of by-products) or behaviours (e.g. feeding) will reduce habitat quality for native taxa?                    | No  | No information available                                                                                                                                 | High      |
| 25                              | 4.12 | Is the taxon likely to maintain a viable population even when present in low densities (or persisting in adverse conditions by way of a dormant form)?                       | No  | Probably no                                                                                                                                              | Low       |
| <b>5. Resource exploitation</b> |      |                                                                                                                                                                              |     |                                                                                                                                                          |           |
| 26                              | 5.01 | Is the taxon likely to consume threatened or protected native taxa in the RA area?                                                                                           | Yes | Can affect endangered benthic invertebrates and fish fry.                                                                                                | High      |
| 27                              | 5.02 | Is the taxon likely to sequester food resources (including nutrients) to the detriment of native taxa in the RA area?                                                        | Yes | Possibly yes                                                                                                                                             | Low       |
| <b>6. Reproduction</b>          |      |                                                                                                                                                                              |     |                                                                                                                                                          |           |
| 28                              | 6.01 | Is the taxon likely to exhibit parental care and/or to reduce age-at-maturity in response to environmental conditions?                                                       | No  | Does not exhibit parental care See: <a href="https://www.fishbase.de/summary/Salmo-trutta.html">https://www.fishbase.de/summary/Salmo-trutta.html</a>    | High      |
| 29                              | 6.02 | Is the taxon likely to produce viable gametes or propagules (in the RA area)?                                                                                                | No  | Kuljanishvili et al 2021 proposed that there are no conditions for this species to produce viable gametes                                                | Low       |
| 30                              | 6.03 | Is the taxon likely to hybridise naturally with native taxa?                                                                                                                 | Yes | It is possible                                                                                                                                           | Low       |
| 31                              | 6.04 | Is the taxon likely to be hermaphroditic or to display asexual reproduction?                                                                                                 | No  | No. Does not display asexual reproduction                                                                                                                | Very high |
| 32                              | 6.05 | Is the taxon dependent on the presence of another taxon (or specific habitat features) to complete its life cycle?                                                           | No  | No. See: <a href="https://www.fishbase.de/summary/Salmo-trutta.html">https://www.fishbase.de/summary/Salmo-trutta.html</a>                               | Very high |
| 33                              | 6.06 | Is the taxon known (or likely) to produce a large number of propagules or offspring within a short time span (e.g. < 1 year)?                                                | Yes | Can spawn 2-3 times during season                                                                                                                        | High      |
| 34                              | 6.07 | How many time units (days, months, years) does the taxon require to reach the age-at-first-reproduction?                                                                     | 2   | 2-3 years                                                                                                                                                | High      |
| <b>7. Dispersal mechanisms</b>  |      |                                                                                                                                                                              |     |                                                                                                                                                          |           |
| 35                              | 7.01 | How many potential internal vectors/pathways could the taxon use to disperse within the RA area (with suitable)                                                              | >1  | Aquaculture, Recreational fisheries, Self Dispersal                                                                                                      | High      |
| 36                              | 7.02 | Will any of these vectors/pathways bring the taxon in close proximity to one or more protected areas (e.g. MCZ, MPA, SSSI)?                                                  | Yes | it can reach there via self-spread                                                                                                                       | Medium    |
| 37                              | 7.03 | Does the taxon have a means of actively attaching itself to hard substrata (e.g. ship hulls, pilings, buoys) such that it enhances the likelihood of dispersal?              | No  | No. Morphologically this species does not have a means of actively attaching itself to hard substrata                                                    | Very high |
| 38                              | 7.04 | Is natural dispersal of the taxon likely to occur as eggs (for animals) or as propagules (for plants: seeds, spores) in the RA area?                                         | No  | No. can not be distributed as eggs.                                                                                                                      | High      |
| 39                              | 7.05 | Is natural dispersal of the taxon likely to occur as larvae/juveniles (for animals) or as fragments/seedlings (for plants) in the RA area?                                   | Yes | Yes. it is possible.                                                                                                                                     | High      |
| 40                              | 7.06 | Are older life stages of the taxon likely to migrate in the RA area for reproduction?                                                                                        | Yes | It is possible, however, it is not documented                                                                                                            | Medium    |
| 41                              | 7.07 | Are propagules or eggs of the taxon likely to be dispersed in the RA area by other animals?                                                                                  | No  | No. Can not be dispersed by other animals                                                                                                                | Very high |
| 42                              | 7.08 | Is dispersal of the taxon along any of the vectors/pathways mentioned in the previous seven questions (35-41; i.e. both unintentional or intentional) likely to be           | Yes | It could be, however not documented                                                                                                                      | Medium    |
| 43                              | 7.09 | Is dispersal of the taxon density dependent?                                                                                                                                 | Yes | Since this species is very territorial, it could be that they will further spread as population density increases                                        | Medium    |
| <b>8. Tolerance attributes</b>  |      |                                                                                                                                                                              |     |                                                                                                                                                          |           |
| 44                              | 8.01 | Is the taxon able to withstand being out of water for extended periods (e.g. minimum of one or more hours) at some stage of its life cycle?                                  | No  | No information available                                                                                                                                 | High      |
| 45                              | 8.02 | Is the taxon tolerant of a wide range of water quality conditions relevant to that taxon? [In the Justification field, indicate the relevant water quality variable(s) being | No  | Can not tolerate low oxygen environment and is very sensitive to temperature and to human-produced chemicals.                                            | Medium    |
| 46                              | 8.03 | Can the taxon be controlled or eradicated in the wild with chemical, biological, or other agents/means?                                                                      | No  | No. This is less likely.                                                                                                                                 | High      |
| 47                              | 8.04 | Is the taxon likely to tolerate or benefit from environmental/human disturbance?                                                                                             | No  | No information available                                                                                                                                 | Very high |
| 48                              | 8.05 | Is the taxon able to tolerate salinity levels that are higher or lower than those found in its usual environment?                                                            | Yes | Found in streams, ponds, rivers and lakes (Ref. 5951). Individuals spend 1 to 5 years in fresh water and 6 months to 5 years in salt water (Ref. 51442). | High      |

|                          |      |                                                                                                                                                              |          |                                                                                                                                                                                                                                                      |           |
|--------------------------|------|--------------------------------------------------------------------------------------------------------------------------------------------------------------|----------|------------------------------------------------------------------------------------------------------------------------------------------------------------------------------------------------------------------------------------------------------|-----------|
| 49                       | 8.06 | Are there effective natural enemies (predators) of the taxon present in the RA                                                                               | No       | No effective natural enemies present in RA area                                                                                                                                                                                                      | Very high |
| <b>C. Climate change</b> |      |                                                                                                                                                              |          |                                                                                                                                                                                                                                                      |           |
| <b>9. Climate change</b> |      |                                                                                                                                                              |          |                                                                                                                                                                                                                                                      |           |
| 50                       | 9.01 | Under the predicted future climatic conditions, are the risks of entry into the RA area posed by the taxon likely to increase, decrease or not change?       | Increase | It was hypothesized that climate change might alert the mechanisms of transportation and introduction of non-native species. Commercial and recreational activities will increase, that itself increases the propagule pressure levels of non-native | High      |
| 51                       | 9.02 | Under the predicted future climatic conditions, are the risks of establishment posed by the taxon likely to increase, decrease or not change?                | Decrease | In terms of increased temperatures this species will be having troubles to survive in the wild                                                                                                                                                       | High      |
| 52                       | 9.03 | Under the predicted future climatic conditions, are the risks of dispersal within the RA area posed by the taxon likely to increase, decrease or not change? | Decrease | Increased temperatures will cause stress in <i>O. mykiss</i> populations making their populations weaker.                                                                                                                                            | High      |
| 53                       | 9.04 | Under the predicted future climatic conditions, what is the likely magnitude of future potential impacts on biodiversity and/or ecological integrity/status? | Lower    | The environment for them will be unbearable and this species populations will decrease.                                                                                                                                                              | High      |
| 54                       | 9.05 | Under the predicted future climatic conditions, what is the likely magnitude of future potential impacts on ecosystem structure and/or function?             | Lower    | the magnitude of future potential impact is low.                                                                                                                                                                                                     | High      |
| 55                       | 9.06 | Under the predicted future climatic conditions, what is the likely magnitude of future potential impacts on ecosystem services/socio-economic factors?       | Lower    | the magnitude of future potential impact is low.                                                                                                                                                                                                     | High      |

| Statistics                                     |             |
|------------------------------------------------|-------------|
| Scores                                         |             |
| <b>BRA</b>                                     | <b>39.0</b> |
| <b>BRA Outcome</b>                             | <b>-</b>    |
| <b>BRA+CCA</b>                                 | <b>31.0</b> |
| <b>BRA+CCA Outcome</b>                         | <b>-</b>    |
| Score partition                                |             |
| <b>A. Biogeography/Historical</b>              | <b>20.0</b> |
| 1. Domestication/Cultivation                   | 4.0         |
| 2. Climate, distribution and introduction risk | 2.0         |
| 3. Invasive elsewhere                          | 14.0        |
| <b>B. Biology/Ecology</b>                      | <b>19.0</b> |
| 4. Undesirable (or persistence) traits         | 6.0         |
| 5. Resource exploitation                       | 7.0         |
| 6. Reproduction                                | 2.0         |
| 7. Dispersal mechanisms                        | 3.0         |
| 8. Tolerance attributes                        | 1.0         |
| <b>C. Climate change</b>                       | <b>-8.0</b> |
| 9. Climate change                              | -8.0        |
| Answered Questions                             |             |
| <b>Total</b>                                   | <b>55</b>   |
| <b>A. Biogeography/Historical</b>              | <b>13</b>   |
| 1. Domestication/Cultivation                   | 3           |
| 2. Climate, distribution and introduction risk | 5           |
| 3. Invasive elsewhere                          | 5           |
| <b>B. Biology/Ecology</b>                      | <b>36</b>   |
| 4. Undesirable (or persistence) traits         | 12          |
| 5. Resource exploitation                       | 2           |
| 6. Reproduction                                | 7           |
| 7. Dispersal mechanisms                        | 9           |
| 8. Tolerance attributes                        | 6           |
| <b>C. Climate change</b>                       | <b>6</b>    |
| 9. Climate change                              | 6           |
| Sectors affected                               |             |
| <b>Commercial</b>                              | <b>13</b>   |
| <b>Environmental</b>                           | <b>7</b>    |
| <b>Species or population nuisance traits</b>   | <b>16</b>   |

| Thresholds     |             |
|----------------|-------------|
| <b>BRA</b>     | <b>-</b>    |
| <b>BRA+CCA</b> | <b>-</b>    |
| Confidence     |             |
| <b>BRA+CCA</b> | <b>0.69</b> |
| <b>BRA</b>     | <b>0.68</b> |
| <b>CCA</b>     | <b>0.75</b> |

| Date and Time       |
|---------------------|
| 22/05/2022 15:47:39 |

## AS-ISK v2

| Taxon and Assessor details         |                                                                                                                                     |
|------------------------------------|-------------------------------------------------------------------------------------------------------------------------------------|
| Category                           | Fishes and Lampreys (freshwater)                                                                                                    |
| Taxon name                         | <i>Salvelinus fontinalis</i>                                                                                                        |
| Common name                        | brook trout                                                                                                                         |
| Assessor                           | Bella Japoshvili                                                                                                                    |
| Risk screening context             |                                                                                                                                     |
| Reason and socio-economic benefits | Widely introduced out of its natural margins. Not yet introduced in the South Caucasus but                                          |
| Risk assessment area               | South Caucasus                                                                                                                      |
| Taxonomy                           | Actinopteri (ray-finned fishes) > Salmoniformes (Salmons) > Salmonidae (Salmonids)                                                  |
| Native range                       | North America                                                                                                                       |
| Introduced range                   | South America, Europe and Asia                                                                                                      |
| URL                                | <a href="https://www.fishbase.de/summary/Salvelinus-fontinalis.html">https://www.fishbase.de/summary/Salvelinus-fontinalis.html</a> |

|                                                |      | Response                                                                                                                                                                | Justification (references and/or other information) | Confidence                                                                                                                                                                                                                                                 |           |
|------------------------------------------------|------|-------------------------------------------------------------------------------------------------------------------------------------------------------------------------|-----------------------------------------------------|------------------------------------------------------------------------------------------------------------------------------------------------------------------------------------------------------------------------------------------------------------|-----------|
| A. Biogeography/Historical                     |      |                                                                                                                                                                         |                                                     |                                                                                                                                                                                                                                                            |           |
| 1. Domestication/Cultivation                   |      |                                                                                                                                                                         |                                                     |                                                                                                                                                                                                                                                            |           |
| 1                                              | 1.01 | Has the taxon been the subject of domestication (or cultivation) for at least 20 generations?                                                                           | Yes                                                 | CABI, 2021. <i>Salvelinus fontinalis</i> (Brook trout). <a href="https://www.cabi.org/isc/datasheet/65325">https://www.cabi.org/isc/datasheet/65325</a> (accessed November 2021)                                                                           | Very high |
| 2                                              | 1.02 | Is the taxon harvested in the wild and likely to be sold or used in its live form?                                                                                      | Yes                                                 | The species was extensively harvested and sold in its live forms in the past, but no information on recent harvesting and use is                                                                                                                           | Low       |
| 3                                              | 1.03 | Does the taxon have invasive races, varieties, sub-taxa or congeners?                                                                                                   | Yes                                                 | Congeneres                                                                                                                                                                                                                                                 | Very high |
| 2. Climate, distribution and introduction risk |      |                                                                                                                                                                         |                                                     |                                                                                                                                                                                                                                                            |           |
| 4                                              | 2.01 | How similar are the climatic conditions of the Risk Assessment (RA) area and the taxon's native range?                                                                  | High                                                | Results of climatch alorgiyhm                                                                                                                                                                                                                              | Medium    |
| 5                                              | 2.02 | What is the quality of the climate matching data?                                                                                                                       | Low                                                 | Due to low accuracy of local climate data                                                                                                                                                                                                                  | High      |
| 6                                              | 2.03 | Is the taxon already present outside of captivity in the RA area?                                                                                                       | No                                                  | CABI, 2021. <i>Salvelinus fontinalis</i> (Brook trout). <a href="https://www.cabi.org/isc/datasheet/65325">https://www.cabi.org/isc/datasheet/65325</a> (accessed November 2021)                                                                           | Very high |
| 7                                              | 2.04 | How many potential vectors could the taxon use to enter in the RA area?                                                                                                 | >1                                                  | Aquacultural and recreational purpose                                                                                                                                                                                                                      | High      |
| 8                                              | 2.05 | Is the taxon currently found in close proximity to, and likely to enter into, the RA area in the near future (e.g. unintentional and intentional introductions)?        | Yes                                                 | CABI, 2021. <i>Salvelinus fontinalis</i> (Brook trout). <a href="https://www.cabi.org/isc/datasheet/65325">https://www.cabi.org/isc/datasheet/65325</a> (accessed November 2021)                                                                           | High      |
| 3. Invasive elsewhere                          |      |                                                                                                                                                                         |                                                     |                                                                                                                                                                                                                                                            |           |
| 9                                              | 3.01 | Has the taxon become naturalised (established viable populations) outside its native range?                                                                             | Yes                                                 | CABI, 2021. <i>Salvelinus fontinalis</i> (Brook trout). <a href="https://www.cabi.org/isc/datasheet/65325">https://www.cabi.org/isc/datasheet/65325</a> (accessed November 2021)                                                                           | Very high |
| 10                                             | 3.02 | In the taxon's introduced range, are there known adverse impacts to wild stocks or commercial taxa?                                                                     | No                                                  | No documented evidence                                                                                                                                                                                                                                     | Medium    |
| 11                                             | 3.03 | In the taxon's introduced range, are there known adverse impacts to aquaculture?                                                                                        | No                                                  | No such an evidence exists                                                                                                                                                                                                                                 | High      |
| 12                                             | 3.04 | In the taxon's introduced range, are there known adverse impacts to ecosystem                                                                                           | No                                                  | No such an evidence is exists                                                                                                                                                                                                                              | High      |
| 13                                             | 3.05 | In the taxon's introduced range, are there known adverse socio-economic impacts?                                                                                        | No                                                  | No such an evidence is exists                                                                                                                                                                                                                              | High      |
| B. Biology/Ecology                             |      |                                                                                                                                                                         |                                                     |                                                                                                                                                                                                                                                            |           |
| 4. Undesirable (or persistence) traits         |      |                                                                                                                                                                         |                                                     |                                                                                                                                                                                                                                                            |           |
| 14                                             | 4.01 | Is it likely that the taxon will be poisonous or pose other risks to human health?                                                                                      | No                                                  | Not a harmful species                                                                                                                                                                                                                                      | Very high |
| 15                                             | 4.02 | Is it likely that the taxon will smother one or more native taxa (that are not threatened or protected)?                                                                | No                                                  | It is reported that the species is outcompeted by a native river salmon (CABI, 2021. <i>Salvelinus fontinalis</i> (Brook trout). <a href="https://www.cabi.org/isc/datasheet/65325">https://www.cabi.org/isc/datasheet/65325</a> (accessed November 2021)) | High      |
| 16                                             | 4.03 | Are there any threatened or protected taxa that the non-native taxon would parasitise in the RA area?                                                                   | No                                                  | Not a parasite species                                                                                                                                                                                                                                     | Very high |
| 17                                             | 4.04 | Is the taxon adaptable in terms of climatic and other environmental conditions, thus enhancing its potential persistence if it has invaded or could invade the RA area? | No                                                  | No relevan information is available                                                                                                                                                                                                                        | Medium    |
| 18                                             | 4.05 | Is the taxon likely to disrupt food-web structure/function in aquatic ecosystems if it has invaded or is likely to invade the RA                                        | No                                                  | Not expected                                                                                                                                                                                                                                               | Medium    |
| 19                                             | 4.06 | Is the taxon likely to exert adverse impacts on ecosystem services in the RA area?                                                                                      | No                                                  | Not expected based on professional judgement                                                                                                                                                                                                               | Medium    |
| 20                                             | 4.07 | Is it likely that the taxon will host, and/or act as a vector for, recognised pests and infectious agents that are endemic in the RA                                    | No                                                  | No such parasite/infectious agent is known from the RA area                                                                                                                                                                                                | High      |
| 21                                             | 4.08 | Is it likely that the taxon will host, and/or act as a vector for, recognised pests and infectious agents that are absent from (novel to) the RA area?                  | Yes                                                 | CABI, 2021. <i>Salvelinus fontinalis</i> (Brook trout). <a href="https://www.cabi.org/isc/datasheet/65325">https://www.cabi.org/isc/datasheet/65325</a> (accessed November 2021)                                                                           | High      |
| 22                                             | 4.09 | Is it likely that the taxon will achieve a body size that will make it more likely to be released from captivity?                                                       | Yes                                                 | Kottelat, M., & Freyhof, J. (2007). Handbook of European freshwater fishes. Publications Kottelat.                                                                                                                                                         | Very high |

|                                 |      |                                                                                                                                                                               |     |                                                                                                                                                                                                                                                                                      |           |
|---------------------------------|------|-------------------------------------------------------------------------------------------------------------------------------------------------------------------------------|-----|--------------------------------------------------------------------------------------------------------------------------------------------------------------------------------------------------------------------------------------------------------------------------------------|-----------|
| 23                              | 4.10 | Is the taxon capable of sustaining itself in a range of water velocity conditions (e.g. versatile in habitat use)?                                                            | Yes | Needs mountain rivers (medium to fast flowing). However Mountain lakes are also invaded CABI, 2021. <i>Salvelinus fontinalis</i> (Brook trout). <a href="https://www.cabi.org/isc/datasheet/65325">https://www.cabi.org/isc/datasheet/65325</a> (accessed November 2021)             | High      |
| 24                              | 4.11 | Is it likely that the taxon's mode of existence (e.g. excretion of by-products) or behaviours (e.g. feeding) will reduce habitat quality for native taxa?                     | No  | Not expected                                                                                                                                                                                                                                                                         | High      |
| 25                              | 4.12 | Is the taxon likely to maintain a viable population even when present in low densities (or persisting in adverse conditions by way of a dormant form)?                        | No  | Not expected, no relevant data                                                                                                                                                                                                                                                       | Medium    |
| <b>5. Resource exploitation</b> |      |                                                                                                                                                                               |     |                                                                                                                                                                                                                                                                                      |           |
| 26                              | 5.01 | Is the taxon likely to consume threatened or protected native taxa in the RA area?                                                                                            | Yes | Some aquatic invertebrates                                                                                                                                                                                                                                                           | Low       |
| 27                              | 5.02 | Is the taxon likely to sequester food resources (including nutrients) to the detriment of native taxa in the RA area?                                                         | Yes | Native salmon                                                                                                                                                                                                                                                                        | High      |
| <b>6. Reproduction</b>          |      |                                                                                                                                                                               |     |                                                                                                                                                                                                                                                                                      |           |
| 28                              | 6.01 | Is the taxon likely to exhibit parental care and/or to reduce age-at-maturity in response to environmental conditions?                                                        | Yes | Muus BJ, Dahlström P, 1981. [English title not available]. (Sötvattensfisk och fiske i Europa.) Sötvattensfisk och fiske i Europa. Stockholm: PA Norstedt & Söners förlag                                                                                                            | Medium    |
| 29                              | 6.02 | Is the taxon likely to produce viable gametes or propagules (in the RA area)?                                                                                                 | No  | No such an evidence exists                                                                                                                                                                                                                                                           | Low       |
| 30                              | 6.03 | Is the taxon likely to hybridise naturally with native taxa?                                                                                                                  | Yes | CABI, 2021. <i>Salvelinus fontinalis</i> (Brook trout). <a href="https://www.cabi.org/isc/datasheet/65325">https://www.cabi.org/isc/datasheet/65325</a> (accessed November 2021); Kottelat, M., & Freyhof, J. (2007). Handbook of European freshwater fishes. Publications Kottelat. | Very high |
| 31                              | 6.04 | Is the taxon likely to be hermaphroditic or to display asexual reproduction?                                                                                                  | No  | Sexually reproducing species                                                                                                                                                                                                                                                         | Medium    |
| 32                              | 6.05 | Is the taxon dependent on the presence of another taxon (or specific habitat features) to complete its life cycle?                                                            | No  | Does not depend on any other species to complete life cycle                                                                                                                                                                                                                          | Very high |
| 33                              | 6.06 | Is the taxon known (or likely) to produce a large number of propagules or offspring within a short time span (e.g. < 1 year)?                                                 | No  | Maximum several thousand of eggs are reported (CABI, 2021. <i>Salvelinus fontinalis</i> (Brook trout). <a href="https://www.cabi.org/isc/datasheet/65325">https://www.cabi.org/isc/datasheet/65325</a> (accessed November 2021))                                                     | Medium    |
| 34                              | 6.07 | How many time units (days, months, years) does the taxon require to reach the age-at-first-reproduction?                                                                      | 1   | year                                                                                                                                                                                                                                                                                 | High      |
| <b>7. Dispersal mechanisms</b>  |      |                                                                                                                                                                               |     |                                                                                                                                                                                                                                                                                      |           |
| 35                              | 7.01 | How many potential internal vectors/pathways could the taxon use to disperse within the RA area (with suitable vectors/pathways)?                                             | > 1 | Recreational and aquacultural purpose, can escape from captivity                                                                                                                                                                                                                     | High      |
| 36                              | 7.02 | Will any of these vectors/pathways bring the taxon in close proximity to one or more protected areas (e.g. MCZ, MPA, SSSI)?                                                   | Yes | Colchis national park along the Black Sea                                                                                                                                                                                                                                            | High      |
| 37                              | 7.03 | Does the taxon have a means of actively attaching itself to hard substrata (e.g. ship hulls, pilings, buoys) such that it enhances the likelihood of dispersal?               | No  | No such a behavior is ever recorded                                                                                                                                                                                                                                                  | Very high |
| 38                              | 7.04 | Is natural dispersal of the taxon likely to occur as eggs (for animals) or as propagules (for plants: seeds, spores) in the RA area?                                          | No  | No such an evidence exists                                                                                                                                                                                                                                                           | Very high |
| 39                              | 7.05 | Is natural dispersal of the taxon likely to occur as larvae/juveniles (for animals) or as fragments/seedlings (for plants) in the RA area?                                    | Yes | Juveniles are usually transported with water currents for long distance                                                                                                                                                                                                              | Very high |
| 40                              | 7.06 | Are older life stages of the taxon likely to migrate in the RA area for reproduction?                                                                                         | No  | Not occurring in neighboring seas                                                                                                                                                                                                                                                    | Very high |
| 41                              | 7.07 | Are propagules or eggs of the taxon likely to be dispersed in the RA area by other animals?                                                                                   | No  | No such an evidence exists                                                                                                                                                                                                                                                           | Very high |
| 42                              | 7.08 | Is dispersal of the taxon along any of the vectors/pathways mentioned in the previous seven questions (35–41; i.e. both unintentional or intentional) likely to be?           | Yes | Human mediated dispersal can be rapid depending on the release intensity.                                                                                                                                                                                                            | Medium    |
| 43                              | 7.09 | Is dispersal of the taxon density dependent?                                                                                                                                  | No  | No such an evidence is known                                                                                                                                                                                                                                                         | High      |
| <b>8. Tolerance attributes</b>  |      |                                                                                                                                                                               |     |                                                                                                                                                                                                                                                                                      |           |
| 44                              | 8.01 | Is the taxon able to withstand being out of water for extended periods (e.g. minimum of one or more hours) at some stage of its life cycle?                                   | No  | As other salmonids this species can not cope with out of water environment                                                                                                                                                                                                           | Very high |
| 45                              | 8.02 | Is the taxon tolerant of a wide range of water quality conditions relevant to that taxon? [In the Justification field, indicate the relevant water quality variable(s) being] | No  | No such an evidence exists                                                                                                                                                                                                                                                           | High      |
| 46                              | 8.03 | Can the taxon be controlled or eradicated in the wild with chemical, biological, or other agents/means?                                                                       | No  | No such an evidence exists                                                                                                                                                                                                                                                           | High      |
| 47                              | 8.04 | Is the taxon likely to tolerate or benefit from environmental/human disturbance?                                                                                              | No  | Not expected based on professional judgment                                                                                                                                                                                                                                          | Very high |
| 48                              | 8.05 | Is the taxon able to tolerate salinity levels that are higher or lower than those found in its usual environment?                                                             | No  | Not expected since in its natural environment the variability of salinity level is very large                                                                                                                                                                                        | High      |

|                          |      |                                                                                                                                                              |           |                                                         |           |
|--------------------------|------|--------------------------------------------------------------------------------------------------------------------------------------------------------------|-----------|---------------------------------------------------------|-----------|
| 49                       | 8.06 | Are there effective natural enemies (predators) of the taxon present in the RA                                                                               | No        | No effective natural enemies are known from the RA area | Very high |
| <b>C. Climate change</b> |      |                                                                                                                                                              |           |                                                         |           |
| <b>9. Climate change</b> |      |                                                                                                                                                              |           |                                                         |           |
| 50                       | 9.01 | Under the predicted future climatic conditions, are the risks of entry into the RA area posed by the taxon likely to increase, decrease or not change?       | Increase  | Based on professional guess                             | Low       |
| 51                       | 9.02 | Under the predicted future climatic conditions, are the risks of establishment posed by the taxon likely to increase, decrease or not change?                | Decrease  | Based on professional guess                             | Low       |
| 52                       | 9.03 | Under the predicted future climatic conditions, are the risks of dispersal within the RA area posed by the taxon likely to increase, decrease or not change? | Decrease  | Based on professional guess                             | Low       |
| 53                       | 9.04 | Under the predicted future climatic conditions, what is the likely magnitude of future potential impacts on biodiversity and/or ecological integrity/status? | No change | Based on professional guess                             | Low       |
| 54                       | 9.05 | Under the predicted future climatic conditions, what is the likely magnitude of future potential impacts on ecosystem structure and/or function?             | No change | Based on professional guess                             | Low       |
| 55                       | 9.06 | Under the predicted future climatic conditions, what is the likely magnitude of future potential impacts on ecosystem services/socio-economic factors?       | Higher    | Based on professional guess                             | Low       |

| Statistics                                     |             |
|------------------------------------------------|-------------|
| Scores                                         |             |
| <b>BRA</b>                                     | <b>17.0</b> |
| <b>BRA Outcome</b>                             | <b>-</b>    |
| <b>BRA+CCA</b>                                 | <b>17.0</b> |
| <b>BRA+CCA Outcome</b>                         | <b>-</b>    |
| Score partition                                |             |
| <b>A. Biogeography/Historical</b>              | <b>7.0</b>  |
| 1. Domestication/Cultivation                   | 4.0         |
| 2. Climate, distribution and introduction risk | 1.0         |
| 3. Invasive elsewhere                          | 2.0         |
| <b>B. Biology/Ecology</b>                      | <b>10.0</b> |
| 4. Undesirable (or persistence) traits         | 2.0         |
| 5. Resource exploitation                       | 7.0         |
| 6. Reproduction                                | 3.0         |
| 7. Dispersal mechanisms                        | 0.0         |
| 8. Tolerance attributes                        | -2.0        |
| <b>C. Climate change</b>                       | <b>0.0</b>  |
| 9. Climate change                              | 0.0         |
| Answered Questions                             |             |
| <b>Total</b>                                   | <b>55</b>   |
| <b>A. Biogeography/Historical</b>              | <b>13</b>   |
| 1. Domestication/Cultivation                   | 3           |
| 2. Climate, distribution and introduction risk | 5           |
| 3. Invasive elsewhere                          | 5           |
| <b>B. Biology/Ecology</b>                      | <b>36</b>   |
| 4. Undesirable (or persistence) traits         | 12          |
| 5. Resource exploitation                       | 2           |
| 6. Reproduction                                | 7           |
| 7. Dispersal mechanisms                        | 9           |
| 8. Tolerance attributes                        | 6           |
| <b>C. Climate change</b>                       | <b>6</b>    |
| 9. Climate change                              | 6           |
| Sectors affected                               |             |
| <b>Commercial</b>                              | <b>8</b>    |
| <b>Environmental</b>                           | <b>6</b>    |
| <b>Species or population nuisance traits</b>   | <b>7</b>    |

| Thresholds     |             |
|----------------|-------------|
| <b>BRA</b>     | <b>-</b>    |
| <b>BRA+CCA</b> | <b>-</b>    |
| Confidence     |             |
| <b>BRA+CCA</b> | <b>0.70</b> |
| <b>BRA</b>     | <b>0.76</b> |
| <b>CCA</b>     | <b>0.25</b> |

| Date and Time       |
|---------------------|
| 16/05/2022 23:08:38 |



## AS-ISK v2

| Taxon and Assessor details         |                                                                                                                                     |
|------------------------------------|-------------------------------------------------------------------------------------------------------------------------------------|
| Category                           | Fishes and Lampreys (freshwater)                                                                                                    |
| Taxon name                         | <i>Salvelinus fontinalis</i>                                                                                                        |
| Common name                        | brook trout                                                                                                                         |
| Assessor                           | Giorgi Eritashvili                                                                                                                  |
| Risk screening context             |                                                                                                                                     |
| Reason and socio-economic benefits | <i>S. fontinalis</i> were intentionally introduced for aquaculture, sport fisheries and for food production                         |
| Risk assessment area               | South Caucasus                                                                                                                      |
| Taxonomy                           | <i>Salvelinus fontinalis</i> (Mitchill, 1814)                                                                                       |
| Native range                       | North America: native to most of eastern Canada from Newfoundland and Labrador to western side                                      |
| Introduced range                   | Introduced widely in North America and temperate regions of other continents. Acclimatization                                       |
| URL                                | <a href="https://www.fishbase.se/summary/Salvelinus-fontinalis.html">https://www.fishbase.se/summary/Salvelinus-fontinalis.html</a> |

|                                                |      |                                                                                                                                                                  | Response | Justification (references and/or other information)                                                                                                                                                                                                                                                                                                                                                                                                                                                                                                                                                                                                   | Confidence |
|------------------------------------------------|------|------------------------------------------------------------------------------------------------------------------------------------------------------------------|----------|-------------------------------------------------------------------------------------------------------------------------------------------------------------------------------------------------------------------------------------------------------------------------------------------------------------------------------------------------------------------------------------------------------------------------------------------------------------------------------------------------------------------------------------------------------------------------------------------------------------------------------------------------------|------------|
| A. Biogeography/Historical                     |      |                                                                                                                                                                  |          |                                                                                                                                                                                                                                                                                                                                                                                                                                                                                                                                                                                                                                                       |            |
| 1. Domestication/Cultivation                   |      |                                                                                                                                                                  |          |                                                                                                                                                                                                                                                                                                                                                                                                                                                                                                                                                                                                                                                       |            |
| 1                                              | 1.01 | Has the taxon been the subject of domestication (or cultivation) for at least 20 generations?                                                                    | Yes      | <i>S. fontinalis</i> were intentionally introduced for aquaculture, sport fisheries and for food production beginning in the late nineteenth century throughout many temperate regions of the world. In Europe, <i>S. fontinalis</i> was originally considered an attractive species, especially for sports fisheries, and it has been extensively stocked in natural waters. Brook trout are commercially raised in large numbers for food production, being sold for human consumption in both fresh and smoked forms.                                                                                                                              | Very high  |
| 2                                              | 1.02 | Is the taxon harvested in the wild and likely to be sold or used in its live form?                                                                               | Yes      | In Yellowstone National Park, anglers may take an unlimited number of non-native brook trout in some drainages.                                                                                                                                                                                                                                                                                                                                                                                                                                                                                                                                       | High       |
| 3                                              | 1.03 | Does the taxon have invasive races, varieties, sub-taxa or congeners?                                                                                            | Yes      | Introductions of <i>S. fontinalis</i> began in the nineteenth century (Welcomme, 1988), to more than 40 countries in temperate areas on all continents, including the southern hemisphere (Welcomme, 1992). <i>S. fontinalis</i> is considered a poor to moderate invader, and this is reflected in its mean fish invasiveness (FISK) score for the United Kingdom (13.5), i.e. the 'medium risk' (of being invasive) category (Copp et al., 2009). Potential impacts include predation on various species of amphibians, zooplankton and other invertebrates as well as increases in primary productivity (Adams et al., 2002; Dunham et al., 2004). | Very high  |
| 2. Climate, distribution and introduction risk |      |                                                                                                                                                                  |          |                                                                                                                                                                                                                                                                                                                                                                                                                                                                                                                                                                                                                                                       |            |
| 4                                              | 2.01 | How similar are the climatic conditions of the Risk Assessment (RA) area and the taxon's native range?                                                           | High     | World Map of the Köppen-Geiger climate classification                                                                                                                                                                                                                                                                                                                                                                                                                                                                                                                                                                                                 | Medium     |
| 5                                              | 2.02 | What is the quality of the climate matching data?                                                                                                                | Medium   | World Map of the Köppen-Geiger climate classification                                                                                                                                                                                                                                                                                                                                                                                                                                                                                                                                                                                                 | Medium     |
| 6                                              | 2.03 | Is the taxon already present outside of captivity in the RA area?                                                                                                | No       | No such fact has been detected                                                                                                                                                                                                                                                                                                                                                                                                                                                                                                                                                                                                                        | High       |
| 7                                              | 2.04 | How many potential vectors could the taxon use to enter in the RA area?                                                                                          | One      | This species may be entered in the SC region intentionally for aquacultural purposes.                                                                                                                                                                                                                                                                                                                                                                                                                                                                                                                                                                 | High       |
| 8                                              | 2.05 | Is the taxon currently found in close proximity to, and likely to enter into, the RA area in the near future (e.g. unintentional and intentional introductions)? | Yes      | <i>Salvelinus fontinalis</i> was introduced in Iran and known to compete with native fish for resources in the Tigris-Euphrates basin.                                                                                                                                                                                                                                                                                                                                                                                                                                                                                                                | Very high  |
| 3. Invasive elsewhere                          |      |                                                                                                                                                                  |          |                                                                                                                                                                                                                                                                                                                                                                                                                                                                                                                                                                                                                                                       |            |
| 9                                              | 3.01 | Has the taxon become naturalised (established viable populations) outside its native range?                                                                      | Yes      | <i>S. fontinalis</i> becoming established in most of Northern Europe (NOBANIS, 2006), with populations believed to be established in high altitude lakes of Corsica, Italy, the Czech Republic and southern Germany.                                                                                                                                                                                                                                                                                                                                                                                                                                  | Very high  |
| 10                                             | 3.02 | In the taxon's introduced range, are there known adverse impacts to wild stocks or commercial taxa?                                                              | Yes      | Studies from North America on the effects of introductions of <i>S. fontinalis</i> into waters where it is not native have shown impacts such as decline of native salmonid species. Species that have been replaced or negatively impacted include strains of cutthroat trout ( <i>Oncorhynchus clarki</i> ), golden trout ( <i>O. aguabonita</i> ), and bull trout ( <i>S. confluentus</i> ).                                                                                                                                                                                                                                                       | Very high  |
| 11                                             | 3.03 | In the taxon's introduced range, are there known adverse impacts to aquaculture?                                                                                 | No       | Data deficient                                                                                                                                                                                                                                                                                                                                                                                                                                                                                                                                                                                                                                        | Low        |
| 12                                             | 3.04 | In the taxon's introduced range, are there known adverse impacts to ecosystem services?                                                                          | Yes      | Some predominantly freshwater species that are also found in marine environments have been included in our assessment. While they have a high impact in the freshwater environment, most of these species are not invasive in marine waters and thus were excluded from the proposed European inventory of alien species that have a high impact on the ecosystem services and biodiversity of the marine environment. These species include the mysid <i>Hemimysis anomala</i> , and the fishes <i>Oncorhynchus mykiss</i>                                                                                                                           | Very high  |
| 13                                             | 3.05 | In the taxon's introduced range, are there known adverse socio-economic impacts?                                                                                 | Yes      | Data deficient                                                                                                                                                                                                                                                                                                                                                                                                                                                                                                                                                                                                                                        | Low        |
| B. Biology/Ecology                             |      |                                                                                                                                                                  |          |                                                                                                                                                                                                                                                                                                                                                                                                                                                                                                                                                                                                                                                       |            |
| 4. Undesirable (or persistence) traits         |      |                                                                                                                                                                  |          |                                                                                                                                                                                                                                                                                                                                                                                                                                                                                                                                                                                                                                                       |            |
| 14                                             | 4.01 | Is it likely that the taxon will be poisonous or pose other risks to human health?                                                                               | No       | This species does not pose a threat to humans.                                                                                                                                                                                                                                                                                                                                                                                                                                                                                                                                                                                                        | Very high  |
| 15                                             | 4.02 | Is it likely that the taxon will smother one or more native taxa (that are not threatened or protected)?                                                         | Yes      | In France, brown trout habitat, growth and apparent survival were hardly affected by brook trout (Blanchet et al. 2007).                                                                                                                                                                                                                                                                                                                                                                                                                                                                                                                              | High       |

|                                 |      |                                                                                                                                                                         |     |                                                                                                                                                                                                                                                                                                                                                                      |           |
|---------------------------------|------|-------------------------------------------------------------------------------------------------------------------------------------------------------------------------|-----|----------------------------------------------------------------------------------------------------------------------------------------------------------------------------------------------------------------------------------------------------------------------------------------------------------------------------------------------------------------------|-----------|
| 16                              | 4.03 | Are there any threatened or protected taxa that the non-native taxon would parasitise in the RA area?                                                                   | Yes | There are several protected and threatened species in the SC region ( <i>Salmo labrax</i> , <i>S. caspius</i> , <i>S. gegarkuni</i> , etc) which turns out to be under the influence of <i>S. fontinalis</i> if this species will be distributed in the region.                                                                                                      | Very high |
| 17                              | 4.04 | Is the taxon adaptable in terms of climatic and other environmental conditions, thus enhancing its potential persistence if it has invaded or could invade the RA area? | Yes | The species is expected to adapt to local environmental conditions.                                                                                                                                                                                                                                                                                                  | High      |
| 18                              | 4.05 | Is the taxon likely to disrupt food-web structure/function in aquatic ecosystems if it has invaded or is likely to invade the RA area?                                  | Yes | It is expected that this will happen.                                                                                                                                                                                                                                                                                                                                | High      |
| 19                              | 4.06 | Is the taxon likely to exert adverse impacts on ecosystem services in the RA area?                                                                                      | Yes | Own judgement                                                                                                                                                                                                                                                                                                                                                        | Low       |
| 20                              | 4.07 | Is it likely that the taxon will host, and/or act as a vector for, recognised pests and infectious agents that are endemic in the RA area?                              | No  | Data deficient                                                                                                                                                                                                                                                                                                                                                       | Low       |
| 21                              | 4.08 | Is it likely that the taxon will host, and/or act as a vector for, recognised pests and infectious agents that are absent from (novel to) the RA area?                  | Yes | It is expected that this will happen.                                                                                                                                                                                                                                                                                                                                | Medium    |
| 22                              | 4.09 | Is it likely that the taxon will achieve a body size that will make it more likely to be released from captivity?                                                       | Yes | This species is widely used in aquaculture. It has maximal length 86.0 cm SL male/unsexed; common length : 26.4 cm TL male/unsexed; max. published weight: 8.0 kg.                                                                                                                                                                                                   | Very high |
| 23                              | 4.10 | Is the taxon capable of sustaining itself in a range of water velocity conditions (e.g. versatile in habitat use)?                                                      | Yes | The brook trout inhabits large and small lakes, rivers, streams, creeks, and spring ponds. They prefer clear waters of high purity and a narrow pH range and are sensitive to poor oxygenation, pollution, and changes in pH caused by environmental effects                                                                                                         | Very high |
| 24                              | 4.11 | Is it likely that the taxon's mode of existence (e.g. excretion of by-products) or behaviours (e.g. feeding) will reduce habitat quality for native taxa?               | No  | No research has been conducted in this direction                                                                                                                                                                                                                                                                                                                     | High      |
| 25                              | 4.12 | Is the taxon likely to maintain a viable population even when present in low densities (or persisting in adverse conditions by way of a dormant form)?                  | No  | Data deficient                                                                                                                                                                                                                                                                                                                                                       | Low       |
| <b>5. Resource exploitation</b> |      |                                                                                                                                                                         |     |                                                                                                                                                                                                                                                                                                                                                                      |           |
| 26                              | 5.01 | Is the taxon likely to consume threatened or protected native taxa in the RA area?                                                                                      | Yes | <i>S. fontinalis</i> is a predator fish and it is expected that it will eat protected/threatened species in the SC region, e.g. <i>Salmo</i> spp, <i>Acipenser</i> spp, etc.                                                                                                                                                                                         | High      |
| 27                              | 5.02 | Is the taxon likely to sequester food resources (including nutrients) to the detriment of native taxa in the RA area?                                                   | Yes | <i>S. fontinalis</i> is a predator fish and it is expected that this will happen.                                                                                                                                                                                                                                                                                    | High      |
| <b>6. Reproduction</b>          |      |                                                                                                                                                                         |     |                                                                                                                                                                                                                                                                                                                                                                      |           |
| 28                              | 6.01 | Is the taxon likely to exhibit parental care and/or to reduce age-at-maturity in response to environmental conditions?                                                  | Yes | In brook trout populations there is a growing body of evidence linking female preference for large males with greater survival of eggs in fish where males make a significant parental investment. In these cases male parental care leads to a greater hatching success of eggs due to the ability of large males to defend eggs from predators (Blanchfield 1998). | High      |
| 29                              | 6.02 | Is the taxon likely to produce viable gametes or propagules (in the RA area)?                                                                                           | No  | No such fact has been detected.                                                                                                                                                                                                                                                                                                                                      | Very high |
| 30                              | 6.03 | Is the taxon likely to hybridise naturally with native taxa?                                                                                                            | Yes | The impact of introductions of <i>S. fontinalis</i> are relatively well documented. For instance, in Canada <i>S. fontinalis</i> is known to hybridise with threatened native <i>S. confluentus</i> .                                                                                                                                                                | Very high |
| 31                              | 6.04 | Is the taxon likely to be hermaphroditic or to display asexual reproduction?                                                                                            | No  | Data deficient                                                                                                                                                                                                                                                                                                                                                       | Low       |
| 32                              | 6.05 | Is the taxon dependent on the presence of another taxon (or specific habitat features) to complete its life cycle?                                                      | Yes | Brook trout are very specific when it comes to habitat, they require cold, clean, well-oxygenated water and even a seemingly minor change in these conditions can result in the loss of brook trout populations (LaConte, 1997).                                                                                                                                     | High      |
| 33                              | 6.06 | Is the taxon known (or likely) to produce a large number of propagules or offspring within a short time span (e.g. < 1 year)?                                           | No  | In <i>S. fontinalis</i> the numbers of eggs varies between 90 and 4,800 eggs.                                                                                                                                                                                                                                                                                        | Medium    |
| 34                              | 6.07 | How many time units (days, months, years) does the taxon require to reach the age-at-first-reproduction?                                                                | 2   | <i>S. fontinalis</i> reach sexual maturity after two to four years.                                                                                                                                                                                                                                                                                                  | High      |
| <b>7. Dispersal mechanisms</b>  |      |                                                                                                                                                                         |     |                                                                                                                                                                                                                                                                                                                                                                      |           |
| 35                              | 7.01 | How many potential internal vectors/pathways could the taxon use to disperse within the RA area (with suitable protected areas (e.g. MCZ, MPA, SSSI)?                   | One | It is likely that this species will spread within the region intentionally by humans.                                                                                                                                                                                                                                                                                | High      |
| 36                              | 7.02 | Will any of these vectors/pathways bring the taxon in close proximity to one or more protected areas (e.g. MCZ, MPA, SSSI)?                                             | Yes | There is a probability of this.                                                                                                                                                                                                                                                                                                                                      | Medium    |
| 37                              | 7.03 | Does the taxon have a means of actively attaching itself to hard substrata (e.g. ship hulls, pilings, buoys) such that it enhances the likelihood of dispersal?         | No  | This species does not has such means.                                                                                                                                                                                                                                                                                                                                | Very high |
| 38                              | 7.04 | Is natural dispersal of the taxon likely to occur as eggs (for animals) or as propagules (for plants: seeds, spores) in the RA area?                                    | No  | This species does not reproduces in the SC region.                                                                                                                                                                                                                                                                                                                   | Very high |
| 39                              | 7.05 | Is natural dispersal of the taxon likely to occur as larvae/juveniles (for animals) or as fragments/seedlings (for plants) in the RA area?                              | No  | This species does not reproduces in the SC region.                                                                                                                                                                                                                                                                                                                   | Very high |

|    |      |                                                                                                                                                                    |     |                                                                                                                                                                                                                                                                                                                                                                                                                                                                                                                                       |           |
|----|------|--------------------------------------------------------------------------------------------------------------------------------------------------------------------|-----|---------------------------------------------------------------------------------------------------------------------------------------------------------------------------------------------------------------------------------------------------------------------------------------------------------------------------------------------------------------------------------------------------------------------------------------------------------------------------------------------------------------------------------------|-----------|
| 40 | 7.06 | Are older life stages of the taxon likely to migrate in the RA area for reproduction?                                                                              | No  | This species does not reproduce in the SC region.                                                                                                                                                                                                                                                                                                                                                                                                                                                                                     | Very high |
| 41 | 7.07 | Are propagules or eggs of the taxon likely to be dispersed in the RA area by other animals?                                                                        | No  | No such fact has been detected.                                                                                                                                                                                                                                                                                                                                                                                                                                                                                                       | Very high |
| 42 | 7.08 | Is dispersal of the taxon along any of the vectors/pathways mentioned in the previous seven questions (35-41; i.e. both unintentional or intentional) likely to be | No  | Own judgement                                                                                                                                                                                                                                                                                                                                                                                                                                                                                                                         | Medium    |
| 43 | 7.09 | Is dispersal of the taxon density dependent?                                                                                                                       | Yes | Evidence of density-dependence in the periphery, consequently, may not be the result of local negative feedback, but rather is the result of a density-regulated source of immigrants. Under such a mechanism, when population size in the core habitat is low, population growth rates the following year are high. This results in an increased number of potential immigrants to the periphery and an increase in peripheral growth rates. High densities in the core then result in elevated growth rates in and dispersal to the | Very high |

#### 8. Tolerance attributes

|    |      |                                                                                                                                                                                           |     |                                                                                                                                                                                                                                                                                                                                                                                                                                                                                                              |           |
|----|------|-------------------------------------------------------------------------------------------------------------------------------------------------------------------------------------------|-----|--------------------------------------------------------------------------------------------------------------------------------------------------------------------------------------------------------------------------------------------------------------------------------------------------------------------------------------------------------------------------------------------------------------------------------------------------------------------------------------------------------------|-----------|
| 44 | 8.01 | Is the taxon able to withstand being out of water for extended periods (e.g. minimum of one or more hours) at some stage of its life cycle?                                               | No  | This species does not exist without water.                                                                                                                                                                                                                                                                                                                                                                                                                                                                   | Very high |
| 45 | 8.02 | Is the taxon tolerant of a wide range of water quality conditions relevant to that taxon? [In the Justification field, indicate the relevant water quality variable(s) being considered.] | Yes | Within their first year, most brook trout reared in aerated water could withstand oxygen concentrations down to 1.9 mg.O2/l. The 50% tolerance level was 1.75 mg.O2/l. Most fish died at 1.5 mg.O2/l. Acclimation to low (but not lethal) oxygen levels occurred; for a drop of 1.0 mg.O2/l. in environmental oxygen concentration, the tolerance level decreased by approximately 0.09 mg.O2/l. and resistance times at given lethal levels increased up to five-fold. By acclimations trout could exist at | High      |
| 46 | 8.03 | Can the taxon be controlled or eradicated in the wild with chemical, biological, or other agents/means?                                                                                   | Yes | As established populations are difficult and costly to control, further introductions or stocking with <i>S. fontinalis</i> should be avoided. The only effective method of fish eradication is the application of rotenone, a pesticide that is also toxic to non-target                                                                                                                                                                                                                                    | Medium    |
| 47 | 8.04 | Is the taxon likely to tolerate or benefit from environmental/human disturbance?                                                                                                          | Yes | This species has spread by humans in many regions.                                                                                                                                                                                                                                                                                                                                                                                                                                                           | Very high |
| 48 | 8.05 | Is the taxon able to tolerate salinity levels that are higher or lower than those found in its usual environment?                                                                         | Yes | The brook trout inhabits large and small lakes, rivers, streams, creeks, and spring ponds. Semianadromous or sea-run brook trout, commonly called "salters", ranged from southern New Jersey, north throughout the Canadian maritime provinces, and west to Hudson Bay. Salters may spend up to three months at sea feeding on crustaceans, fish, and marine worms in the spring, not straying more than a few miles from the river mouth.                                                                   | Very high |
| 49 | 8.06 | Are there effective natural enemies (predators) of the taxon present in the RA area?                                                                                                      | Yes | There are several potential predators in the SC region which can control the <i>S. fontinalis</i> populations: <i>Esox lucius</i> , <i>Salmo</i> spp, <i>Sander lucioperca</i> , etc.                                                                                                                                                                                                                                                                                                                        | Medium    |

#### C. Climate change

##### 9. Climate change

|    |      |                                                                                                                                                              |           |               |        |
|----|------|--------------------------------------------------------------------------------------------------------------------------------------------------------------|-----------|---------------|--------|
| 50 | 9.01 | Under the predicted future climatic conditions, are the risks of entry into the RA area posed by the taxon likely to increase, decrease or not change?       | No change | Own judgement | Low    |
| 51 | 9.02 | Under the predicted future climatic conditions, are the risks of establishment posed by the taxon likely to increase, decrease or not change?                | No change | Own judgement | Low    |
| 52 | 9.03 | Under the predicted future climatic conditions, are the risks of dispersal within the RA area posed by the taxon likely to increase, decrease or not change? | No change | Own judgement | Low    |
| 53 | 9.04 | Under the predicted future climatic conditions, what is the likely magnitude of future potential impacts on biodiversity and/or ecological integrity/status? | No change | Own judgement | Low    |
| 54 | 9.05 | Under the predicted future climatic conditions, what is the likely magnitude of future potential impacts on ecosystem structure and/or function?             | Lower     | Own judgement | Low    |
| 55 | 9.06 | Under the predicted future climatic conditions, what is the likely magnitude of future potential impacts on ecosystem services/socio-economic factors?       | Lower     | Own judgement | Medium |

| Statistics                                     |             |
|------------------------------------------------|-------------|
| Scores                                         |             |
| <b>BRA</b>                                     | <b>33.0</b> |
| <b>BRA Outcome</b>                             | -           |
| <b>BRA+CCA</b>                                 | <b>29.0</b> |
| <b>BRA+CCA Outcome</b>                         | -           |
| Score partition                                |             |
| <b>A. Biogeography/Historical</b>              | <b>18.0</b> |
| 1. Domestication/Cultivation                   | 4.0         |
| 2. Climate, distribution and introduction risk | 0.0         |
| 3. Invasive elsewhere                          | 14.0        |
| <b>B. Biology/Ecology</b>                      | <b>15.0</b> |
| 4. Undesirable (or persistence) traits         | 8.0         |

|                                                |             |
|------------------------------------------------|-------------|
| 5. Resource exploitation                       | 7.0         |
| 6. Reproduction                                | 0.0         |
| 7. Dispersal mechanisms                        | -3.0        |
| 8. Tolerance attributes                        | 3.0         |
| <b>C. Climate change</b>                       | <b>-4.0</b> |
| 9. Climate change                              | -4.0        |
| <b>Answered Questions</b>                      |             |
| <b>Total</b>                                   | <b>55</b>   |
| <b>A. Biogeography/Historical</b>              | <b>13</b>   |
| 1. Domestication/Cultivation                   | 3           |
| 2. Climate, distribution and introduction risk | 5           |
| 3. Invasive elsewhere                          | 5           |
| <b>B. Biology/Ecology</b>                      | <b>36</b>   |
| 4. Undesirable (or persistence) traits         | 12          |
| 5. Resource exploitation                       | 2           |
| 6. Reproduction                                | 7           |
| 7. Dispersal mechanisms                        | 9           |
| 8. Tolerance attributes                        | 6           |
| <b>C. Climate change</b>                       | <b>6</b>    |
| 9. Climate change                              | 6           |
| <b>Sectors affected</b>                        |             |
| <b>Commercial</b>                              | <b>9</b>    |
| <b>Environmental</b>                           | <b>10</b>   |
| <b>Species or population nuisance traits</b>   | <b>11</b>   |

|                   |             |
|-------------------|-------------|
| <b>Thresholds</b> |             |
| <b>BRA</b>        | <b>-</b>    |
| <b>BRA+CCA</b>    | <b>-</b>    |
| <b>Confidence</b> |             |
| <b>BRA+CCA</b>    | <b>0.70</b> |
| <b>BRA</b>        | <b>0.76</b> |
| <b>CCA</b>        | <b>0.29</b> |

|                            |  |
|----------------------------|--|
| <b>Date and Time</b>       |  |
| <b>13/05/2022 18:34:08</b> |  |

## AS-ISK v2

| Taxon and Assessor details         |                                                                                                                                     |
|------------------------------------|-------------------------------------------------------------------------------------------------------------------------------------|
| Category                           | Fishes and Lampreys (freshwater)                                                                                                    |
| Taxon name                         | <i>Salvelinus fontinalis</i>                                                                                                        |
| Common name                        | brook trout                                                                                                                         |
| Assessor                           | Tatia Kuljanishvili                                                                                                                 |
| Risk screening context             |                                                                                                                                     |
| Reason and socio-economic benefits | Has been introduced for aquaculture, sportfishing                                                                                   |
| Risk assessment area               | South Caucasus                                                                                                                      |
| Taxonomy                           | Actinopteri (ray-finned fishes) > Salmoniformes (Salmons) > Salmonidae (Salmonids)                                                  |
| Native range                       | Eastern Canada                                                                                                                      |
| Introduced range                   | more than 40 countries in temperate areas on all continents                                                                         |
| URL                                | <a href="https://www.fishbase.se/summary/Salvelinus-fontinalis.html">https://www.fishbase.se/summary/Salvelinus-fontinalis.html</a> |

|                                                |      | Response                                                                                                                                                                | Justification (references and/or other information) | Confidence                                                                                                                                    |           |
|------------------------------------------------|------|-------------------------------------------------------------------------------------------------------------------------------------------------------------------------|-----------------------------------------------------|-----------------------------------------------------------------------------------------------------------------------------------------------|-----------|
| A. Biogeography/Historical                     |      |                                                                                                                                                                         |                                                     |                                                                                                                                               |           |
| 1. Domestication/Cultivation                   |      |                                                                                                                                                                         |                                                     |                                                                                                                                               |           |
| 1                                              | 1.01 | Has the taxon been the subject of domestication (or cultivation) for at least 20 generations?                                                                           | Yes                                                 | yes commercially valuable fish                                                                                                                | Very high |
| 2                                              | 1.02 | Is the taxon harvested in the wild and likely to be sold or used in its live form?                                                                                      | Yes                                                 | Yes. Taxon is harvested in wild and is sold in its live form                                                                                  | Very high |
| 3                                              | 1.03 | Does the taxon have invasive races, varieties, sub-taxa or congeners?                                                                                                   | Yes                                                 | yes. Has invasive races                                                                                                                       | Very high |
| 2. Climate, distribution and introduction risk |      |                                                                                                                                                                         |                                                     |                                                                                                                                               |           |
| 4                                              | 2.01 | How similar are the climatic conditions of the Risk Assessment (RA) area and the taxon's native range?                                                                  | High                                                | 14 out of 19 stations are similar with the values of 7,8, and 9                                                                               | Medium    |
| 5                                              | 2.02 | What is the quality of the climate matching data?                                                                                                                       | Medium                                              | Medium                                                                                                                                        | Medium    |
| 6                                              | 2.03 | Is the taxon already present outside of captivity in the RA area?                                                                                                       | No                                                  | No evidence.                                                                                                                                  | Very high |
| 7                                              | 2.04 | How many potential vectors could the taxon use to enter in the RA area?                                                                                                 | >1                                                  | Aquaculture, sportfishing                                                                                                                     | Very high |
| 8                                              | 2.05 | Is the taxon currently found in close proximity to, and likely to enter into, the RA area in the near future (e.g. unintentional and intentional introductions)?        | Yes                                                 | yes. Turkey                                                                                                                                   | Very high |
| 3. Invasive elsewhere                          |      |                                                                                                                                                                         |                                                     |                                                                                                                                               |           |
| 9                                              | 3.01 | Has the taxon become naturalised (established viable populations) outside its                                                                                           | Yes                                                 | Yes it has become naturalized outside its native area                                                                                         | High      |
| 10                                             | 3.02 | In the taxon's introduced range, are there known adverse impacts to wild stocks or commercial taxa?                                                                     | Yes                                                 | list of threatened taxa can be found on <a href="https://www.cabi.org/isc/datasheet/65325">https://www.cabi.org/isc/datasheet/65325</a>       | Very high |
| 11                                             | 3.03 | In the taxon's introduced range, are there known adverse impacts to aquaculture?                                                                                        | No                                                  | Not assessed                                                                                                                                  | Low       |
| 12                                             | 3.04 | In the taxon's introduced range, are there known adverse impacts to ecosystem                                                                                           | No                                                  | transmission of diseases                                                                                                                      | Low       |
| 13                                             | 3.05 | In the taxon's introduced range, are there known adverse socio-economic impacts?                                                                                        | No                                                  | Not known                                                                                                                                     | Low       |
| B. Biology/Ecology                             |      |                                                                                                                                                                         |                                                     |                                                                                                                                               |           |
| 4. Undesirable (or persistence) traits         |      |                                                                                                                                                                         |                                                     |                                                                                                                                               |           |
| 14                                             | 4.01 | Is it likely that the taxon will be poisonous or pose other risks to human health?                                                                                      | No                                                  | Not poisonous                                                                                                                                 | Very high |
| 15                                             | 4.02 | Is it likely that the taxon will smother one or more native taxa (that are not threatened or protected)?                                                                | Yes                                                 | list of threatened taxa can be found on <a href="https://www.cabi.org/isc/datasheet/65325">https://www.cabi.org/isc/datasheet/65325</a>       | Very high |
| 16                                             | 4.03 | Are there any threatened or protected taxa that the non-native taxon would parasitise in the RA area?                                                                   | No                                                  | Does not parasite                                                                                                                             | Very high |
| 17                                             | 4.04 | Is the taxon adaptable in terms of climatic and other environmental conditions, thus enhancing its potential persistence if it has invaded or could invade the RA area? | No                                                  | Very sensitive species does not tolerate wider range of climatic or environmental conditions                                                  | High      |
| 18                                             | 4.05 | Is the taxon likely to disrupt food-web structure/function in aquatic ecosystems if it has invaded or is likely to invade the RA                                        | No                                                  | No documented evidence                                                                                                                        | Low       |
| 19                                             | 4.06 | Is the taxon likely to exert adverse impacts on ecosystem services in the RA area?                                                                                      | No                                                  | diseases                                                                                                                                      | Very high |
| 20                                             | 4.07 | Is it likely that the taxon will host, and/or act as a vector for, recognised pests and infectious agents that are endemic in the RA                                    | No                                                  | No info                                                                                                                                       | Low       |
| 21                                             | 4.08 | Is it likely that the taxon will host, and/or act as a vector for, recognised pests and infectious agents that are absent from (novel to) the RA area?                  | Yes                                                 | it is likely                                                                                                                                  | Medium    |
| 22                                             | 4.09 | Is it likely that the taxon will achieve a body size that will make it more likely to be released from captivity?                                                       | Yes                                                 | yes. See: <a href="https://www.fishbase.se/summary/Salvelinus-fontinalis.html">https://www.fishbase.se/summary/Salvelinus-fontinalis.html</a> | Very high |
| 23                                             | 4.10 | Is the taxon capable of sustaining itself in a range of water velocity conditions (e.g. versatile in habitat use)?                                                      | Yes                                                 | yes. It is likely                                                                                                                             | High      |

|                                 |      |                                                                                                                                                                              |                |                                                                                                                                                                         |           |
|---------------------------------|------|------------------------------------------------------------------------------------------------------------------------------------------------------------------------------|----------------|-------------------------------------------------------------------------------------------------------------------------------------------------------------------------|-----------|
| 24                              | 4.11 | Is it likely that the taxon's mode of existence (e.g. excretion of by-products) or behaviours (e.g. feeding) will reduce habitat quality for native taxa?                    | No             | No information available                                                                                                                                                | Very high |
| 25                              | 4.12 | Is the taxon likely to maintain a viable population even when present in low densities (or persisting in adverse conditions by way of a dormant form)?                       | Yes            | Yes. it is possible                                                                                                                                                     | Low       |
| <b>5. Resource exploitation</b> |      |                                                                                                                                                                              |                |                                                                                                                                                                         |           |
| 26                              | 5.01 | Is the taxon likely to consume threatened or protected native taxa in the RA area?                                                                                           | Yes            | It is possible                                                                                                                                                          | High      |
| 27                              | 5.02 | Is the taxon likely to sequester food resources (including nutrients) to the detriment of native taxa in the RA area?                                                        | No             | No. unlikely                                                                                                                                                            | High      |
| <b>6. Reproduction</b>          |      |                                                                                                                                                                              |                |                                                                                                                                                                         |           |
| 28                              | 6.01 | Is the taxon likely to exhibit parental care and/or to reduce age-at-maturity in response to environmental conditions?                                                       | No             | Does not exhibit parental care See: <a href="https://www.fishbase.se/summary/Salvelinus-fontinalis.html">https://www.fishbase.se/summary/Salvelinus-fontinalis.html</a> | High      |
| 29                              | 6.02 | Is the taxon likely to produce viable gametes or propagules (in the RA area)?                                                                                                | No             | less likely                                                                                                                                                             | Low       |
| 30                              | 6.03 | Is the taxon likely to hybridise naturally with native taxa?                                                                                                                 | No             | No information available                                                                                                                                                | Medium    |
| 31                              | 6.04 | Is the taxon likely to be hermaphroditic or to display asexual reproduction?                                                                                                 | No             | No. Does not display asexual reproduction                                                                                                                               | Very high |
| 32                              | 6.05 | Is the taxon dependent on the presence of another taxon (or specific habitat features) to complete its life cycle?                                                           | No             | No. See: <a href="https://www.fishbase.se/summary/Salvelinus-fontinalis.html">https://www.fishbase.se/summary/Salvelinus-fontinalis.html</a>                            | Very high |
| 33                              | 6.06 | Is the taxon known (or likely) to produce a large number of propagules or offspring within a short time span (e.g. < 1 year)?                                                | Yes            | can produce up to 5000 eggs                                                                                                                                             | Medium    |
| 34                              | 6.07 | How many time units (days, months, years) does the taxon require to reach the age-at-first-reproduction?                                                                     | 3              | 2-4 years                                                                                                                                                               | Very high |
| <b>7. Dispersal mechanisms</b>  |      |                                                                                                                                                                              |                |                                                                                                                                                                         |           |
| 35                              | 7.01 | How many potential internal vectors/pathways could the taxon use to disperse within the RA area (with suitable)                                                              | > 1            | aquaculture or recreational fisheries                                                                                                                                   | Very high |
| 36                              | 7.02 | Will any of these vectors/pathways bring the taxon in close proximity to one or more protected areas (e.g. MCZ, MPA, SSSI)?                                                  | Yes            | it is possible                                                                                                                                                          | Low       |
| 37                              | 7.03 | Does the taxon have a means of actively attaching itself to hard substrata (e.g. ship hulls, pilings, buoys) such that it enhances the likelihood of dispersal?              | No             | No. Morphologically this species does not have a means of actively attaching itself to hard substrata                                                                   | Very high |
| 38                              | 7.04 | Is natural dispersal of the taxon likely to occur as eggs (for animals) or as propagules (for plants: seeds, spores) in the RA area?                                         | No             | No. can not be distributed as eggs.                                                                                                                                     | Very high |
| 39                              | 7.05 | Is natural dispersal of the taxon likely to occur as larvae/juveniles (for animals) or as fragments/seedlings (for plants) in the RA area?                                   | Yes            | Yes. it is possible.                                                                                                                                                    | Very high |
| 40                              | 7.06 | Are older life stages of the taxon likely to migrate in the RA area for reproduction?                                                                                        | Yes            | it is possible                                                                                                                                                          | Medium    |
| 41                              | 7.07 | Are propagules or eggs of the taxon likely to be dispersed in the RA area by other animals?                                                                                  | No             | No. Can not be dispersed by other animals                                                                                                                               | Very high |
| 42                              | 7.08 | Is dispersal of the taxon along any of the vectors/pathways mentioned in the previous seven questions (35-41; i.e. both unintentional or intentional) likely to be           | Not applicable | not yet recorded in the wild.                                                                                                                                           | Medium    |
| 43                              | 7.09 | Is dispersal of the taxon density dependent?                                                                                                                                 | Yes            | They are territorial animals, therefore dispersal is density                                                                                                            | Medium    |
| <b>8. Tolerance attributes</b>  |      |                                                                                                                                                                              |                |                                                                                                                                                                         |           |
| 44                              | 8.01 | Is the taxon able to withstand being out of water for extended periods (e.g. minimum of one or more hours) at some stage of its life cycle?                                  | No             | No information available                                                                                                                                                | High      |
| 45                              | 8.02 | Is the taxon tolerant of a wide range of water quality conditions relevant to that taxon? [In the Justification field, indicate the relevant water quality variable(s) being | No             | no. do not tolerate wide range of water quality conditions                                                                                                              | High      |
| 46                              | 8.03 | Can the taxon be controlled or eradicated in the wild with chemical, biological, or other agents/means?                                                                      | Yes            | Yes but it is costly and sometimes ineffective                                                                                                                          | Medium    |
| 47                              | 8.04 | Is the taxon likely to tolerate or benefit from environmental/human disturbance?                                                                                             | No             | No                                                                                                                                                                      | Very high |
| 48                              | 8.05 | Is the taxon able to tolerate salinity levels that are higher or lower than those found in its usual environment?                                                            | Yes            | It is possible                                                                                                                                                          | High      |
| 49                              | 8.06 | Are there effective natural enemies (predators) of the taxon present in the RA                                                                                               | No             | No effective natural enemies present in RA area                                                                                                                         | Very high |
| <b>C. Climate change</b>        |      |                                                                                                                                                                              |                |                                                                                                                                                                         |           |
| <b>9. Climate change</b>        |      |                                                                                                                                                                              |                |                                                                                                                                                                         |           |
| 50                              | 9.01 | Under the predicted future climatic conditions, are the risks of entry into the RA area posed by the taxon likely to increase, decrease or not change?                       | Increase       | increases.                                                                                                                                                              | High      |

|    |      |                                                                                                                                                              |           |                                                                                     |        |
|----|------|--------------------------------------------------------------------------------------------------------------------------------------------------------------|-----------|-------------------------------------------------------------------------------------|--------|
| 51 | 9.02 | Under the predicted future climatic conditions, are the risks of establishment posed by the taxon likely to increase, decrease or not change?                | Decrease  | Decrease                                                                            | Low    |
| 52 | 9.03 | Under the predicted future climatic conditions, are the risks of dispersal within the RA area posed by the taxon likely to increase, decrease or not change? | Increase  | They might be forced to disperse in higher altitudes where temperatures will be low | Low    |
| 53 | 9.04 | Under the predicted future climatic conditions, what is the likely magnitude of future potential impacts on biodiversity and/or ecological integrity/status? | No change | No change                                                                           | Low    |
| 54 | 9.05 | Under the predicted future climatic conditions, what is the likely magnitude of future potential impacts on ecosystem structure and/or function?             | No change | no change                                                                           | Medium |
| 55 | 9.06 | Under the predicted future climatic conditions, what is the likely magnitude of future potential impacts on ecosystem services/socio-economic factors?       | No change | no change                                                                           | Low    |

| Statistics                                     |             |
|------------------------------------------------|-------------|
| Scores                                         |             |
| <b>BRA</b>                                     | <b>21.0</b> |
| <b>BRA Outcome</b>                             | <b>-</b>    |
| <b>BRA+CCA</b>                                 | <b>23.0</b> |
| <b>BRA+CCA Outcome</b>                         | <b>-</b>    |
| Score partition                                |             |
| <b>A. Biogeography/Historical</b>              | <b>11.0</b> |
| 1. Domestication/Cultivation                   | 4.0         |
| 2. Climate, distribution and introduction risk | 1.0         |
| 3. Invasive elsewhere                          | 6.0         |
| <b>B. Biology/Ecology</b>                      | <b>10.0</b> |
| 4. Undesirable (or persistence) traits         | 4.0         |
| 5. Resource exploitation                       | 5.0         |
| 6. Reproduction                                | 0.0         |
| 7. Dispersal mechanisms                        | 2.0         |
| 8. Tolerance attributes                        | -1.0        |
| <b>C. Climate change</b>                       | <b>2.0</b>  |
| 9. Climate change                              | 2.0         |
| Answered Questions                             |             |
| <b>Total</b>                                   | <b>55</b>   |
| <b>A. Biogeography/Historical</b>              | <b>13</b>   |
| 1. Domestication/Cultivation                   | 3           |
| 2. Climate, distribution and introduction risk | 5           |
| 3. Invasive elsewhere                          | 5           |
| <b>B. Biology/Ecology</b>                      | <b>36</b>   |
| 4. Undesirable (or persistence) traits         | 12          |
| 5. Resource exploitation                       | 2           |
| 6. Reproduction                                | 7           |
| 7. Dispersal mechanisms                        | 9           |
| 8. Tolerance attributes                        | 6           |
| <b>C. Climate change</b>                       | <b>6</b>    |
| 9. Climate change                              | 6           |
| Sectors affected                               |             |
| <b>Commercial</b>                              | <b>9</b>    |
| <b>Environmental</b>                           | <b>6</b>    |
| <b>Species or population nuisance traits</b>   | <b>11</b>   |

| Thresholds     |             |
|----------------|-------------|
| <b>BRA</b>     | <b>-</b>    |
| <b>BRA+CCA</b> | <b>-</b>    |
| Confidence     |             |
| <b>BRA+CCA</b> | <b>0.70</b> |
| <b>BRA</b>     | <b>0.74</b> |
| <b>CCA</b>     | <b>0.38</b> |

| Date and Time       |  |
|---------------------|--|
| 22/05/2022 15:51:45 |  |

## AS-ISK v2

| Taxon and Assessor details         |                                                                                                                             |
|------------------------------------|-----------------------------------------------------------------------------------------------------------------------------|
| Category                           | Fishes and Lampreys (freshwater)                                                                                            |
| Taxon name                         | <i>Sander lucioperca</i>                                                                                                    |
| Common name                        | pikeperch                                                                                                                   |
| Assessor                           | Bella Japoshvili                                                                                                            |
| Risk screening context             |                                                                                                                             |
| Reason and socio-economic benefits | The species is naturally occurs in the Black-Caspian Sea basins, however was not known from Arax                            |
| Risk assessment area               | South Caucasus                                                                                                              |
| Taxonomy                           | Actinopteri (ray-finned fishes) > Perciformes/Percoidae (Perches) > Percidae (Perches)                                      |
| Native range                       | Europe                                                                                                                      |
| Introduced range                   | Worldwide                                                                                                                   |
| URL                                | <a href="https://www.fishbase.de/summary/Sander-lucioperca.html">https://www.fishbase.de/summary/Sander-lucioperca.html</a> |

|                                                |      |                                                                                                                                                                         | Response | Justification (references and/or other information)                                                                                                                                                                                                                                                                                                                          | Confidence |
|------------------------------------------------|------|-------------------------------------------------------------------------------------------------------------------------------------------------------------------------|----------|------------------------------------------------------------------------------------------------------------------------------------------------------------------------------------------------------------------------------------------------------------------------------------------------------------------------------------------------------------------------------|------------|
| A. Biogeography/Historical                     |      |                                                                                                                                                                         |          |                                                                                                                                                                                                                                                                                                                                                                              |            |
| 1. Domestication/Cultivation                   |      |                                                                                                                                                                         |          |                                                                                                                                                                                                                                                                                                                                                                              |            |
| 1                                              | 1.01 | Has the taxon been the subject of domestication (or cultivation) for at least 20 generations?                                                                           | Yes      | e.g. Zakeš, Z. (2007). Out-of-season spawning of cultured pikeperch [ <i>Sander lucioperca</i> (L.)]. Aquaculture Research, 38(13), 1419-1427.                                                                                                                                                                                                                               | Very high  |
| 2                                              | 1.02 | Is the taxon harvested in the wild and likely to be sold or used in its live form?                                                                                      | Yes      | Personal observation                                                                                                                                                                                                                                                                                                                                                         | Very high  |
| 3                                              | 1.03 | Does the taxon have invasive races, varieties, sub-taxa or congeners?                                                                                                   | No       | Not known                                                                                                                                                                                                                                                                                                                                                                    | High       |
| 2. Climate, distribution and introduction risk |      |                                                                                                                                                                         |          |                                                                                                                                                                                                                                                                                                                                                                              |            |
| 4                                              | 2.01 | How similar are the climatic conditions of the Risk Assessment (RA) area and the taxon's native range?                                                                  | Medium   | Results of climatch algorithm                                                                                                                                                                                                                                                                                                                                                | Low        |
| 5                                              | 2.02 | What is the quality of the climate matching data?                                                                                                                       | Low      | Due to low accuracy of local climate data                                                                                                                                                                                                                                                                                                                                    | High       |
| 6                                              | 2.03 | Is the taxon already present outside of captivity in the RA area?                                                                                                       | Yes      | e.g. Berg S, 2012. Zander <i>Sander lucioperca</i> (Linnaeus, 1758). (Sandart <i>Sander lucioperca</i> (Linnaeus, 1758).) In: Atlas over Danske ferskvandsfisk [ed. by Carl, H. Møller, P. R.]. Copenhagen, Denmark: Natural History Museum of Denmark, University of Copenhagen, 585-599.                                                                                   | Very high  |
| 7                                              | 2.04 | How many potential vectors could the taxon use to enter in the RA area?                                                                                                 | >1       | Recreational purpose, Natural dispersal                                                                                                                                                                                                                                                                                                                                      | High       |
| 8                                              | 2.05 | Is the taxon currently found in close proximity to, and likely to enter into, the RA area in the near future (e.g. unintentional and intentional introductions)?        | Yes      | Kuljanishvili, T., Mumladze, L., Japoshvili, B., Mustafayev, N., Ibrahimov, S., Patoka, J., ... & Kalous, L. (2021). The first unified inventory of non-native fishes of the South Caucasian countries, Armenia, Azerbaijan, and Georgia. Knowledge & Management of Aquatic Ecosystems, (422), 32.                                                                           | Very high  |
| 3. Invasive elsewhere                          |      |                                                                                                                                                                         |          |                                                                                                                                                                                                                                                                                                                                                                              |            |
| 9                                              | 3.01 | Has the taxon become naturalised (established viable populations) outside its                                                                                           | Yes      | <a href="https://www.cabi.org/isc/datasheet/65338#F361ADBE-F16F-40BB-967C-72193652783C">https://www.cabi.org/isc/datasheet/65338#F361ADBE-F16F-40BB-967C-72193652783C</a>                                                                                                                                                                                                    | Very high  |
| 10                                             | 3.02 | In the taxon's introduced range, are there known adverse impacts to wild stocks or commercial taxa?                                                                     | Yes      | Koed A; Jepsen N; Aarestrup K; Nielsen C, 2002. Initial mortality of radiotagged Atlantic salmon ( <i>Salmo salar</i> L.) smolts following release downstream of a hydropower station. Hydrobiologia, 483:31-37.; Crivelli AJ, 1995. Are fish introductions a threat to endemic freshwater fishes in the northern Mediterranean region? Biological Conservation, 72:311-319. | High       |
| 11                                             | 3.03 | In the taxon's introduced range, are there known adverse impacts to aquaculture?                                                                                        | Yes      | Koed A; Jepsen N; Aarestrup K; Nielsen C, 2002. Initial mortality of radiotagged Atlantic salmon ( <i>Salmo salar</i> L.) smolts following release downstream of a hydropower station. Hydrobiologia, 483:31-37.; Crivelli AJ, 1995. Are fish introductions a threat to endemic freshwater fishes in the northern Mediterranean region? Biological Conservation, 72:311-319. | High       |
| 12                                             | 3.04 | In the taxon's introduced range, are there known adverse impacts to ecosystem                                                                                           | No       | No documented evidence                                                                                                                                                                                                                                                                                                                                                       | Low        |
| 13                                             | 3.05 | In the taxon's introduced range, are there known adverse socio-economic impacts?                                                                                        | No       | No documented evidence                                                                                                                                                                                                                                                                                                                                                       | Low        |
| B. Biology/Ecology                             |      |                                                                                                                                                                         |          |                                                                                                                                                                                                                                                                                                                                                                              |            |
| 4. Undesirable (or persistence) traits         |      |                                                                                                                                                                         |          |                                                                                                                                                                                                                                                                                                                                                                              |            |
| 14                                             | 4.01 | Is it likely that the taxon will be poisonous or pose other risks to human health?                                                                                      | No       | Sepecies is harmless                                                                                                                                                                                                                                                                                                                                                         | High       |
| 15                                             | 4.02 | Is it likely that the taxon will smother one or more native taxa (that are not threatened or protected)?                                                                | Yes      | Because of predatory lifestyle                                                                                                                                                                                                                                                                                                                                               | Medium     |
| 16                                             | 4.03 | Are there any threatened or protected taxa that the non-native taxon would parasitise in the RA area?                                                                   | Yes      | The species is strong predator consuming appropriately sized fishes and invertebrates of any kind                                                                                                                                                                                                                                                                            | High       |
| 17                                             | 4.04 | Is the taxon adaptable in terms of climatic and other environmental conditions, thus enhancing its potential persistence if it has invaded or could invade the RA area? | Yes      | Occurs wide range of environmental conditions however not well documented the extrem environmental conditions                                                                                                                                                                                                                                                                | Low        |
| 18                                             | 4.05 | Is the taxon likely to disrupt food-web structure/function in aquatic ecosystems if it has invaded or is likely to invade the RA area?                                  | Yes      | Due to preadoty lifestyle e.g. Schulze, T., U. Baade, H. Dörner, R. Eckmann, S.S. Haertel-Borer, F. Hölker and T. Mehner 2006. Response of the residential piscivorous fish community to introduction of a new predator type in a mesotrophic lake. Canadian Journal of Fisheries and Aquatic Science                                                                        | Low        |
| 19                                             | 4.06 | Is the taxon likely to exert adverse impacts on ecosystem services in the RA area?                                                                                      | No       | No documented evidence                                                                                                                                                                                                                                                                                                                                                       | Low        |



|                                 |      |                                                                                                                                                                    |     |                                                                                                                                                                                                                                                                                                                                                                                                                                                       |           |
|---------------------------------|------|--------------------------------------------------------------------------------------------------------------------------------------------------------------------|-----|-------------------------------------------------------------------------------------------------------------------------------------------------------------------------------------------------------------------------------------------------------------------------------------------------------------------------------------------------------------------------------------------------------------------------------------------------------|-----------|
| 20                              | 4.07 | Is it likely that the taxon will host, and/or act as a vector for, recognised pests and infectious agents that are endemic in the RA                               | No  | No documented evidence                                                                                                                                                                                                                                                                                                                                                                                                                                | Low       |
| 21                              | 4.08 | Is it likely that the taxon will host, and/or act as a vector for, recognised pests and infectious agents that are absent from (novel to) the RA area?             | Yes | No documented evidence                                                                                                                                                                                                                                                                                                                                                                                                                                | Low       |
| 22                              | 4.09 | Is it likely that the taxon will achieve a body size that will make it more likely to be released from captivity?                                                  | Yes | Can be as large as 1 m                                                                                                                                                                                                                                                                                                                                                                                                                                | High      |
| 23                              | 4.10 | Is the taxon capable of sustaining itself in a range of water velocity conditions (e.g. versatile in habitat use)?                                                 | No  | Usually lives in standing or slowly moving rivers                                                                                                                                                                                                                                                                                                                                                                                                     | Low       |
| 24                              | 4.11 | Is it likely that the taxon's mode of existence (e.g. excretion of by-products) or behaviours (e.g. feeding) will reduce habitat quality for native taxa?          | No  | Most probably no because of predatory foraging behavior                                                                                                                                                                                                                                                                                                                                                                                               | Low       |
| 25                              | 4.12 | Is the taxon likely to maintain a viable population even when present in low densities (or persisting in adverse conditions by way of a dormant form)?             | No  | Not known                                                                                                                                                                                                                                                                                                                                                                                                                                             | Low       |
| <b>5. Resource exploitation</b> |      |                                                                                                                                                                    |     |                                                                                                                                                                                                                                                                                                                                                                                                                                                       |           |
| 26                              | 5.01 | Is the taxon likely to consume threatened or protected native taxa in the RA area?                                                                                 | Yes | Fishes (such as for instance Cuciobarbus capito, ro Salmo caspius)                                                                                                                                                                                                                                                                                                                                                                                    | Very high |
| 27                              | 5.02 | Is the taxon likely to sequester food resources (including nutrients) to the detriment of native taxa in the RA area?                                              | Yes | e.g. Esox lucius                                                                                                                                                                                                                                                                                                                                                                                                                                      | Very high |
| <b>6. Reproduction</b>          |      |                                                                                                                                                                    |     |                                                                                                                                                                                                                                                                                                                                                                                                                                                       |           |
| 28                              | 6.01 | Is the taxon likely to exhibit parental care and/or to reduce age-at-maturity in response to environmental conditions?                                             | Yes | Kottelat, M. and J. Freyhof, 2007. Handbook of European freshwater fishes. Publications Kottelat, Cornol and Freyhof, Berlin.                                                                                                                                                                                                                                                                                                                         | Very high |
| 29                              | 6.02 | Is the taxon likely to produce viable gametes or propagules (in the RA area)?                                                                                      | Yes | It was recorded naturally with 10 years of a laps of time. Pipoyan SKH, Tigranyan EA. 2002. Modern fish fauna of Armenia. J Ichthyol (in Russian) 42: 601-604.; Pipoyan SKH. 2012. Ichthyofauna of Armenia: stages of formation and current state, Palmarium Academic Publishing (In Russian), p. 538.                                                                                                                                                | Medium    |
| 30                              | 6.03 | Is the taxon likely to hybridise naturally with native taxa?                                                                                                       | Yes | Kahilainen KK; Teacher AGF; Kahkonen K; Vinni M; Lehtonen H; Merila J, 2010. First record of natural hybridization and introgression between pikeperch (Sander lucioperca) and perch (Perca fluviatilis). Ann. Zool. Fenn, 48:39-44. Müller T; Taller J; Kolics S; Kovács B; Urbányi B; Specziár A, 2010. First record of natural hybridization between pikeperch Sander lucioperca and Volga pikeperch S. volgaensis. J. Appl. Ichthvol. 26:481-484. | Very high |
| 31                              | 6.04 | Is the taxon likely to be hermaphroditic or to display asexual reproduction?                                                                                       | No  | Reproducing sexually                                                                                                                                                                                                                                                                                                                                                                                                                                  | High      |
| 32                              | 6.05 | Is the taxon dependent on the presence of another taxon (or specific habitat features) to complete its life cycle?                                                 | No  | Is independ during the completing its lifecycle                                                                                                                                                                                                                                                                                                                                                                                                       | Very high |
| 33                              | 6.06 | Is the taxon known (or likely) to produce a large number of propagules or offspring within a short time span (e.g. < 1 year)?                                      | Yes | Kottelat, M. and J. Freyhof, 2007. Handbook of European freshwater fishes. Publications Kottelat, Cornol and Freyhof, Berlin.                                                                                                                                                                                                                                                                                                                         | Very high |
| 34                              | 6.07 | How many time units (days, months, years) does the taxon require to reach the age-at-first-reproduction?                                                           | 3   | Years                                                                                                                                                                                                                                                                                                                                                                                                                                                 | High      |
| <b>7. Dispersal mechanisms</b>  |      |                                                                                                                                                                    |     |                                                                                                                                                                                                                                                                                                                                                                                                                                                       |           |
| 35                              | 7.01 | How many potential internal vectors/pathways could the taxon use to disperse within the RA area (with suitable)                                                    | >1  | Due to its value as a recreational fishery, it is supposed to be active translocated. It can also dispers on its own                                                                                                                                                                                                                                                                                                                                  | High      |
| 36                              | 7.02 | Will any of these vectors/pathways bring the taxon in close proximity to one or more protected areas (e.g. MCZ, MPA, SSSI)?                                        | No  | No such PAs in the respective RA area                                                                                                                                                                                                                                                                                                                                                                                                                 | High      |
| 37                              | 7.03 | Does the taxon have a means of actively attaching itself to hard substrata (e.g. ship hulls, pilings, buoys) such that it enhances the likelihood of dispersal?    | No  | No such behavior is known                                                                                                                                                                                                                                                                                                                                                                                                                             | Very high |
| 38                              | 7.04 | Is natural dispersal of the taxon likely to occur as eggs (for animals) or as propagules (for plants: seeds, spores) in the RA area?                               | No  | No such an evidence exists                                                                                                                                                                                                                                                                                                                                                                                                                            | Medium    |
| 39                              | 7.05 | Is natural dispersal of the taxon likely to occur as larvae/juveniles (for animals) or as fragments/seedlings (for plants) in the RA area?                         | Yes | Juvenalis can spread through water currents                                                                                                                                                                                                                                                                                                                                                                                                           | High      |
| 40                              | 7.06 | Are older life stages of the taxon likely to migrate in the RA area for reproduction?                                                                              | Yes | Since the species are known from nearby regions, it can migrate in the Aras basin for spawning. Kottelat, M. and J. Freyhof, 2007. Handbook of European freshwater fishes. Publications Kottelat, Cornol and Freyhof, Berlin.                                                                                                                                                                                                                         | Medium    |
| 41                              | 7.07 | Are propagules or eggs of the taxon likely to be dispersed in the RA area by other animals?                                                                        | No  | No such an evidence is known                                                                                                                                                                                                                                                                                                                                                                                                                          | High      |
| 42                              | 7.08 | Is dispersal of the taxon along any of the vectors/pathways mentioned in the previous seven questions (35-41; i.e. both unintentional or intentional) likely to be | Yes | Based on professional judgement                                                                                                                                                                                                                                                                                                                                                                                                                       | Low       |
| 43                              | 7.09 | Is dispersal of the taxon density dependent?                                                                                                                       | No  | Not known                                                                                                                                                                                                                                                                                                                                                                                                                                             | Low       |
| <b>8. Tolerance attributes</b>  |      |                                                                                                                                                                    |     |                                                                                                                                                                                                                                                                                                                                                                                                                                                       |           |

|    |      |                                                                                                                                                                              |    |                                 |        |
|----|------|------------------------------------------------------------------------------------------------------------------------------------------------------------------------------|----|---------------------------------|--------|
| 44 | 8.01 | Is the taxon able to withstand being out of water for extended periods (e.g. minimum of one or more hours) at some stage of its life cycle?                                  | No | Not known though not expected   | Medium |
| 45 | 8.02 | Is the taxon tolerant of a wide range of water quality conditions relevant to that taxon? [In the Justification field, indicate the relevant water quality variable(s) being | No | Not well documented             | Low    |
| 46 | 8.03 | Can the taxon be controlled or eradicated in the wild with chemical, biological, or other agents/means?                                                                      | No | No documented cases exists      | Low    |
| 47 | 8.04 | Is the taxon likely to tolerate or benefit from environmental/human disturbance?                                                                                             | No | Based on professional judgement | Low    |
| 48 | 8.05 | Is the taxon able to tolerate salinity levels that are higher or lower than those found in its usual environment?                                                            | No | Based on professional judgement | Low    |
| 49 | 8.06 | Are there effective natural enemies (predators) of the taxon present in the RA                                                                                               | No | Based on professional judgement | Low    |

#### C. Climate change

##### 9. Climate change

|    |      |                                                                                                                                                              |           |                                 |        |
|----|------|--------------------------------------------------------------------------------------------------------------------------------------------------------------|-----------|---------------------------------|--------|
| 50 | 9.01 | Under the predicted future climatic conditions, are the risks of entry into the RA area posed by the taxon likely to increase, decrease or not change?       | No change | Based on professional judgement | Medium |
| 51 | 9.02 | Under the predicted future climatic conditions, are the risks of establishment posed by the taxon likely to increase, decrease or not change?                | Increase  | professional judgement          | Medium |
| 52 | 9.03 | Under the predicted future climatic conditions, are the risks of dispersal within the RA area posed by the taxon likely to increase, decrease or not change? | Increase  | Based on professional judgement | Medium |
| 53 | 9.04 | Under the predicted future climatic conditions, what is the likely magnitude of future potential impacts on biodiversity and/or ecological integrity/status? | Higher    | Based on professional judgement | Medium |
| 54 | 9.05 | Under the predicted future climatic conditions, what is the likely magnitude of future potential impacts on ecosystem structure and/or function?             | Higher    | Based on professional judgement | Low    |
| 55 | 9.06 | Under the predicted future climatic conditions, what is the likely magnitude of future potential impacts on ecosystem services/socio-economic factors?       | No change | Based on professional judgement | Low    |

| Statistics                                     |             |
|------------------------------------------------|-------------|
| Scores                                         |             |
| <b>BRA</b>                                     | <b>30.0</b> |
| <b>BRA Outcome</b>                             | <b>-</b>    |
| <b>BRA+CCA</b>                                 | <b>38.0</b> |
| <b>BRA+CCA Outcome</b>                         | <b>-</b>    |
| Score partition                                |             |
| <b>A. Biogeography/Historical</b>              | <b>14.0</b> |
| 1. Domestication/Cultivation                   | 2.0         |
| 2. Climate, distribution and introduction risk | 2.0         |
| 3. Invasive elsewhere                          | 10.0        |
| <b>B. Biology/Ecology</b>                      | <b>16.0</b> |
| 4. Undesirable (or persistence) traits         | 6.0         |
| 5. Resource exploitation                       | 7.0         |
| 6. Reproduction                                | 4.0         |
| 7. Dispersal mechanisms                        | 1.0         |
| 8. Tolerance attributes                        | -2.0        |
| <b>C. Climate change</b>                       | <b>8.0</b>  |
| 9. Climate change                              | 8.0         |
| Answered Questions                             |             |
| <b>Total</b>                                   | <b>55</b>   |
| <b>A. Biogeography/Historical</b>              | <b>13</b>   |
| 1. Domestication/Cultivation                   | 3           |
| 2. Climate, distribution and introduction risk | 5           |
| 3. Invasive elsewhere                          | 5           |
| <b>B. Biology/Ecology</b>                      | <b>36</b>   |
| 4. Undesirable (or persistence) traits         | 12          |
| 5. Resource exploitation                       | 2           |
| 6. Reproduction                                | 7           |
| 7. Dispersal mechanisms                        | 9           |
| 8. Tolerance attributes                        | 6           |
| <b>C. Climate change</b>                       | <b>6</b>    |
| 9. Climate change                              | 6           |
| Sectors affected                               |             |
| <b>Commercial</b>                              | <b>15</b>   |
| <b>Environmental</b>                           | <b>10</b>   |
| <b>Species or population nuisance traits</b>   | <b>17</b>   |

| Thresholds |          |
|------------|----------|
| <b>BRA</b> | <b>-</b> |

|                   |                |             |
|-------------------|----------------|-------------|
|                   | <b>BRA+CCA</b> | <b>-</b>    |
| <b>Confidence</b> |                |             |
|                   | <b>BRA+CCA</b> | <b>0.58</b> |
|                   | <b>BRA</b>     | <b>0.60</b> |
|                   | <b>CCA</b>     | <b>0.42</b> |

|                            |  |
|----------------------------|--|
| <b>Date and Time</b>       |  |
| <b>16/05/2022 23:17:06</b> |  |

AS-ISK v2

| Taxon and Assessor details         |                                                                                                                             |
|------------------------------------|-----------------------------------------------------------------------------------------------------------------------------|
| Category                           | Fishes and Lampreys (freshwater)                                                                                            |
| Taxon name                         | <i>Sander lucioperca</i>                                                                                                    |
| Common name                        | pikeperch                                                                                                                   |
| Assessor                           | Giorgi Epitashvili                                                                                                          |
| Risk screening context             |                                                                                                                             |
| Reason and socio-economic benefits | The fish has wide distribution in the world. It is a trade important species.                                               |
| Risk assessment area               | South Caucasus                                                                                                              |
| Taxonomy                           | <i>Sander lucioperca</i> (Linnaeus 1758)                                                                                    |
| Native range                       | Europe and Asia: Caspian, Baltic, Black and Aral Sea basins; Elbe (North Sea basin) and Maritza                             |
| Introduced range                   | Introduced widely in Europe and other regions of the world                                                                  |
| URL                                | <a href="https://www.fishbase.se/summary/sander-lucioperca.html">https://www.fishbase.se/summary/sander-lucioperca.html</a> |

|                                                |      |                                                                                                                                                                         | Response | Justification (references and/or other information)                                                                                                                                                                                                                                                                                                                                                                                                                         | Confidence |
|------------------------------------------------|------|-------------------------------------------------------------------------------------------------------------------------------------------------------------------------|----------|-----------------------------------------------------------------------------------------------------------------------------------------------------------------------------------------------------------------------------------------------------------------------------------------------------------------------------------------------------------------------------------------------------------------------------------------------------------------------------|------------|
| A. Biogeography/Historical                     |      |                                                                                                                                                                         |          |                                                                                                                                                                                                                                                                                                                                                                                                                                                                             |            |
| 1. Domestication/Cultivation                   |      |                                                                                                                                                                         |          |                                                                                                                                                                                                                                                                                                                                                                                                                                                                             |            |
| 1                                              | 1.01 | Has the taxon been the subject of domestication (or cultivation) for at least 20 generations?                                                                           | Yes      | Currently, the main producing countries of <i>S. lucioperca</i> are the Czech Republic, Denmark, Hungary, Romania, Tunisia and Ukraine. In addition to the other countries shown on the FAO map, pike-perch are also grown in the Netherlands and Poland.                                                                                                                                                                                                                   | Very high  |
| 2                                              | 1.02 | Is the taxon harvested in the wild and likely to be sold or used in its live form?                                                                                      | Yes      | Cultivating and maintaining broodstocks in RAS frees this type of pike-perch production from the necessity of catching spawners in the wild.                                                                                                                                                                                                                                                                                                                                | Very high  |
| 3                                              | 1.03 | Does the taxon have invasive races, varieties, sub-taxa or congeners?                                                                                                   | Yes      | As <i>S. lucioperca</i> is an obligate piscivore as an adult, this species will predate on native and non-native fish species where                                                                                                                                                                                                                                                                                                                                         | Very high  |
| 2. Climate, distribution and introduction risk |      |                                                                                                                                                                         |          |                                                                                                                                                                                                                                                                                                                                                                                                                                                                             |            |
| 4                                              | 2.01 | How similar are the climatic conditions of the Risk Assessment (RA) area and the taxon's native range?                                                                  | High     | This species is naturally distributed in the South Caucasus region and translocated within the region by fishermen. Therefore, natural conditions for this species between native and introduced ranges is more or less similar                                                                                                                                                                                                                                             | Very high  |
| 5                                              | 2.02 | What is the quality of the climate matching data?                                                                                                                       | High     | Köppen-Geiger climate classification map                                                                                                                                                                                                                                                                                                                                                                                                                                    | High       |
| 6                                              | 2.03 | Is the taxon already present outside of captivity in the RA area?                                                                                                       | Yes      | This species is naturally distributed in the South Caucasus region (Kuljanishvili et al. 2020).                                                                                                                                                                                                                                                                                                                                                                             | Very high  |
| 7                                              | 2.04 | How many potential vectors could the taxon use to enter in the RA area?                                                                                                 | >1       | This species is spread naturally within the SC region and also by humans.                                                                                                                                                                                                                                                                                                                                                                                                   | High       |
| 8                                              | 2.05 | Is the taxon currently found in close proximity to, and likely to enter into, the RA area in the near future (e.g. unintentional and intentional introductions)?        | Yes      | These species is distributed in the Caucasus region and surrounding (Turkey, Iran, Russia, etc)                                                                                                                                                                                                                                                                                                                                                                             | Very high  |
| 3. Invasive elsewhere                          |      |                                                                                                                                                                         |          |                                                                                                                                                                                                                                                                                                                                                                                                                                                                             |            |
| 9                                              | 3.01 | Has the taxon become naturalised (established viable populations) outside its native range?                                                                             | Yes      | Pikeperch is found naturalised as an alien species in a large number of countries in Europe (Lever 1996), including the UK, Denmark, Italy, Turkey, France and Holland (Perez-Bote & Roso,                                                                                                                                                                                                                                                                                  | Very high  |
| 10                                             | 3.02 | In the taxon's introduced range, are there known adverse impacts to wild stocks or commercial taxa?                                                                     | Yes      | As <i>S. lucioperca</i> is an obligate piscivore as an adult, this species will predate on native and non-native fish species where introduced.                                                                                                                                                                                                                                                                                                                             | Very high  |
| 11                                             | 3.03 | In the taxon's introduced range, are there known adverse impacts to aquaculture?                                                                                        | Yes      | <i>S. lucioperca</i> can also potentially cause the collapse of a fishery by removing many of the young fish not allowing them to grow and spawn.                                                                                                                                                                                                                                                                                                                           | High       |
| 12                                             | 3.04 | In the taxon's introduced range, are there known adverse impacts to ecosystem                                                                                           | Yes      | Data deficient                                                                                                                                                                                                                                                                                                                                                                                                                                                              | Low        |
| 13                                             | 3.05 | In the taxon's introduced range, are there known adverse socio-economic impacts?                                                                                        | Yes      | There is insufficient information available to determine how <i>Sander lucioperca</i> would impact socio-economics in the Great Lakes region, USA. <i>S. lucioperca</i> is a top predator of brown trout, perch and salmonids, and as such could impact commercial fisheries for these species. It is not known to what extent <i>S. lucioperca</i> could affect these fisheries, but many think that it could benefit North American fisheries due to its popularity as an | Low        |
| B. Biology/Ecology                             |      |                                                                                                                                                                         |          |                                                                                                                                                                                                                                                                                                                                                                                                                                                                             |            |
| 4. Undesirable (or persistence) traits         |      |                                                                                                                                                                         |          |                                                                                                                                                                                                                                                                                                                                                                                                                                                                             |            |
| 14                                             | 4.01 | Is it likely that the taxon will be poisonous or pose other risks to human health?                                                                                      | No       | This species does not pose a threat to humans                                                                                                                                                                                                                                                                                                                                                                                                                               | High       |
| 15                                             | 4.02 | Is it likely that the taxon will smother one or more native taxa (that are not threatened or protected)?                                                                | Yes      | Schulze et al. (2006) noted that when <i>S. lucioperca</i> was introduced into a German lake, there was a shift in perch ( <i>Perca fluviatilis</i> ) habitat usage from the pelagic zones of the lake towards the littoral zone in response to the competition from the pikeperch. They also stated there was an increase in predation on juvenile perch by both pikeperch and pike ( <i>Esox Lucius</i> ) leading to a decrease in the abundance of large perch           | Very high  |
| 16                                             | 4.03 | Are there any threatened or protected taxa that the non-native taxon would parasitise in the RA area?                                                                   | Yes      | <i>S. lucioperca</i> is a predator fish and can eat threatened and protected species in the South Caucasus region such as <i>Luciobarbus capito</i> , <i>Salmo</i> spp, <i>Acipencer</i> spp, etc.                                                                                                                                                                                                                                                                          | Very high  |
| 17                                             | 4.04 | Is the taxon adaptable in terms of climatic and other environmental conditions, thus enhancing its potential persistence if it has invaded or could invade the RA area? | Yes      | This species is naturally distributed in the SC region and therefore environmental conditions of the region is suitable for it.                                                                                                                                                                                                                                                                                                                                             | Very high  |
| 18                                             | 4.05 | Is the taxon likely to disrupt food-web structure/function in aquatic ecosystems if it has invaded or is likely to invade the RA                                        | Yes      | As a predator, <i>S. lucioperca</i> can disrupt food web structure in such ecosystems where it was not naturally distributed.                                                                                                                                                                                                                                                                                                                                               | High       |
| 19                                             | 4.06 | Is the taxon likely to exert adverse impacts on ecosystem services in the RA area?                                                                                      | Yes      | As a predator, <i>S. lucioperca</i> can affect on local ecosystem services such as recreational/commercial fishing (This is manifested in the reduction of local species).                                                                                                                                                                                                                                                                                                  | High       |

|                                 |      |                                                                                                                                                                              |     |                                                                                                                                                                                                                                                             |           |
|---------------------------------|------|------------------------------------------------------------------------------------------------------------------------------------------------------------------------------|-----|-------------------------------------------------------------------------------------------------------------------------------------------------------------------------------------------------------------------------------------------------------------|-----------|
| 20                              | 4.07 | Is it likely that the taxon will host, and/or act as a vector for, recognised pests and infectious agents that are endemic in the RA                                         | No  | Data deficient                                                                                                                                                                                                                                              | Low       |
| 21                              | 4.08 | Is it likely that the taxon will host, and/or act as a vector for, recognised pests and infectious agents that are absent from (novel to) the RA area?                       | Yes | <i>S. lucioperca</i> is a vector of fish diseases and parasites which can be transmitted to native and farmed fish.                                                                                                                                         | Medium    |
| 22                              | 4.09 | Is it likely that the taxon will achieve a body size that will make it more likely to be released from captivity?                                                            | Yes | This species generally attains lengths of 50-70 cm and body weights (BW) of 2-5 kg but a maximum length of 130 cm and weights of 12-18 kg have been reported.                                                                                               | Very high |
| 23                              | 4.10 | Is the taxon capable of sustaining itself in a range of water velocity conditions (e.g. versatile in habitat use)?                                                           | Yes | Adults inhabit large, turbid rivers and eutrophic lakes, brackish coastal lakes and estuaries.                                                                                                                                                              | High      |
| 24                              | 4.11 | Is it likely that the taxon's mode of existence (e.g. excretion of by-products) or behaviours (e.g. feeding) will reduce habitat quality for native taxa?                    | No  | In the South Caucasus this is not expected as <i>S. lucioperca</i> is a native species.                                                                                                                                                                     | Low       |
| 25                              | 4.12 | Is the taxon likely to maintain a viable population even when present in low densities (or persisting in adverse conditions by way of a dormant form)?                       | No  | Data deficient                                                                                                                                                                                                                                              | Low       |
| <b>5. Resource exploitation</b> |      |                                                                                                                                                                              |     |                                                                                                                                                                                                                                                             |           |
| 26                              | 5.01 | Is the taxon likely to consume threatened or protected native taxa in the RA area?                                                                                           | Yes | <i>S. lucioperca</i> is a predator fish and can eat threatened and protected species in the South Caucasus region                                                                                                                                           | Very high |
| 27                              | 5.02 | Is the taxon likely to sequester food resources (including nutrients) to the detriment of native taxa in the RA area?                                                        | Yes | <i>S. lucioperca</i> is a predator fish and can other species distributed in the SC region.                                                                                                                                                                 | Low       |
| <b>6. Reproduction</b>          |      |                                                                                                                                                                              |     |                                                                                                                                                                                                                                                             |           |
| 28                              | 6.01 | Is the taxon likely to exhibit parental care and/or to reduce age-at-maturity in response to environmental conditions?                                                       | Yes | Data deficient                                                                                                                                                                                                                                              | Low       |
| 29                              | 6.02 | Is the taxon likely to produce viable gametes or propagules (in the RA area)?                                                                                                | Yes | This species is naturally reproduces in the SC region                                                                                                                                                                                                       | Very high |
| 30                              | 6.03 | Is the taxon likely to hybridise naturally with native taxa?                                                                                                                 | Yes | A case of natural hybridization between pikeperch ( <i>Sander lucioperca</i> ) and perch ( <i>Perca fluviatilis</i> ) was confirmed based on the intermediate morphological, anatomical and genetic characteristics of the hybrid (Kahilainen et al. 2011). | Very high |
| 31                              | 6.04 | Is the taxon likely to be hermaphroditic or to display asexual reproduction?                                                                                                 | No  | No data                                                                                                                                                                                                                                                     | Medium    |
| 32                              | 6.05 | Is the taxon dependent on the presence of another taxon (or specific habitat features) to complete its life cycle?                                                           | No  | Such a fact is not known.                                                                                                                                                                                                                                   | Medium    |
| 33                              | 6.06 | Is the taxon known (or likely) to produce a large number of propagules or offspring within a short time span (e.g. < 1 year)?                                                | Yes | Fecundity varies from 13 000 to 1000000 eggs (Ninua et al. 2013).                                                                                                                                                                                           | High      |
| 34                              | 6.07 | How many time units (days, months, years) does the taxon require to reach the age-at-first-reproduction?                                                                     | 2   | The species become mature at the age of 2-4 (Ninua et al. 2013).                                                                                                                                                                                            | High      |
| <b>7. Dispersal mechanisms</b>  |      |                                                                                                                                                                              |     |                                                                                                                                                                                                                                                             |           |
| 35                              | 7.01 | How many potential internal vectors/pathways could the taxon use to disperse within the RA area (with suitable)                                                              | >1  | This species is spread naturally in the SC region and possibly by humans (translocation)                                                                                                                                                                    | Medium    |
| 36                              | 7.02 | Will any of these vectors/pathways bring the taxon in close proximity to one or more protected areas (e.g. MCZ, MPA, SSSI)?                                                  | Yes | This species is distributed in the protected areas of the SC region, for instance in Kolikheti National Park in Georgia.                                                                                                                                    | High      |
| 37                              | 7.03 | Does the taxon have a means of actively attaching itself to hard substrata (e.g. ship hulls, pilings, buoys) such that it enhances the likelihood of dispersal?              | No  | Such a fact is not known                                                                                                                                                                                                                                    | Very high |
| 38                              | 7.04 | Is natural dispersal of the taxon likely to occur as eggs (for animals) or as propagules (for plants: seeds, spores) in the RA area?                                         | Yes | This species is naturally distributed in the SC region and other animals may move its eggs from one place to another.                                                                                                                                       | Medium    |
| 39                              | 7.05 | Is natural dispersal of the taxon likely to occur as larvae/juveniles (for animals) or as fragments/seedlings (for plants) in the RA area?                                   | Yes | This species is naturally dispersed within the region                                                                                                                                                                                                       | High      |
| 40                              | 7.06 | Are older life stages of the taxon likely to migrate in the RA area for reproduction?                                                                                        | Yes | This species is naturally reproduces within the region                                                                                                                                                                                                      | High      |
| 41                              | 7.07 | Are propagules or eggs of the taxon likely to be dispersed in the RA area by other animals?                                                                                  | Yes | Probably yes (Data deficient)                                                                                                                                                                                                                               | Medium    |
| 42                              | 7.08 | Is dispersal of the taxon along any of the vectors/pathways mentioned in the previous seven questions (35-41; i.e. both unintentional or intentional) likely to be           | No  | No data                                                                                                                                                                                                                                                     | Low       |
| 43                              | 7.09 | Is dispersal of the taxon density dependent?                                                                                                                                 | Yes | No research has been conducted in this direction although its prevalence may depend on population density.                                                                                                                                                  | Low       |
| <b>8. Tolerance attributes</b>  |      |                                                                                                                                                                              |     |                                                                                                                                                                                                                                                             |           |
| 44                              | 8.01 | Is the taxon able to withstand being out of water for extended periods (e.g. minimum of one or more hours) at some stage of its life cycle?                                  | No  | Such fact has not detect                                                                                                                                                                                                                                    | Medium    |
| 45                              | 8.02 | Is the taxon tolerant of a wide range of water quality conditions relevant to that taxon? [In the Justification field, indicate the relevant water quality variable(s) being | Yes | <i>S. lucioperca</i> inhabits rivers, lakes, reservoirs, moderately running waters and brackish coastal waters with salinities of ca. 12 ppt (Larsen and Berg, 2006) or more. It thrives in turbid, moderately eutrophic waters with high oxygen content    | Very high |

|                          |      |                                                                                                                                                              |          |                                                                                                                                       |           |
|--------------------------|------|--------------------------------------------------------------------------------------------------------------------------------------------------------------|----------|---------------------------------------------------------------------------------------------------------------------------------------|-----------|
| 46                       | 8.03 | Can the taxon be controlled or eradicated in the wild with chemical, biological, or other agents/means?                                                      | No       | As established populations are difficult and costly to control, further introductions or stocking should be avoided.                  | High      |
| 47                       | 8.04 | Is the taxon likely to tolerate or benefit from environmental/human disturbance?                                                                             | No       | Data deficient                                                                                                                        | Low       |
| 48                       | 8.05 | Is the taxon able to tolerate salinity levels that are higher or lower than those found in its usual environment?                                            | Yes      | S. lucioperca inhabits rivers, lakes, reservoirs, moderately running waters and brackish coastal waters with salinities of ca. 12 ppt | High      |
| 49                       | 8.06 | Are there effective natural enemies (predators) of the taxon present in the RA                                                                               | Yes      | There are several predator species which can eat S. lucioperca in the Caucasus region: Esox lucius, Silurus glanis, etc.              | Very high |
| <b>C. Climate change</b> |      |                                                                                                                                                              |          |                                                                                                                                       |           |
| <b>9. Climate change</b> |      |                                                                                                                                                              |          |                                                                                                                                       |           |
| 50                       | 9.01 | Under the predicted future climatic conditions, are the risks of entry into the RA area posed by the taxon likely to increase, decrease or not change?       | Decrease | Own judgement                                                                                                                         | Medium    |
| 51                       | 9.02 | Under the predicted future climatic conditions, are the risks of establishment posed by the taxon likely to increase, decrease or not change?                | Decrease | Own judgement                                                                                                                         | Medium    |
| 52                       | 9.03 | Under the predicted future climatic conditions, are the risks of dispersal within the RA area posed by the taxon likely to increase, decrease or not change? | Increase | Translocation by humans                                                                                                               | Medium    |
| 53                       | 9.04 | Under the predicted future climatic conditions, what is the likely magnitude of future potential impacts on biodiversity and/or ecological integrity/status? | Lower    | Own judgement                                                                                                                         | Medium    |
| 54                       | 9.05 | Under the predicted future climatic conditions, what is the likely magnitude of future potential impacts on ecosystem structure and/or function?             | Lower    | Own judgement                                                                                                                         | Medium    |
| 55                       | 9.06 | Under the predicted future climatic conditions, what is the likely magnitude of future potential impacts on ecosystem services/socio-economic factors?       | Lower    | Own judgement                                                                                                                         | Medium    |

| Statistics                                     |             |
|------------------------------------------------|-------------|
| Scores                                         |             |
| <b>BRA</b>                                     | <b>50.0</b> |
| <b>BRA Outcome</b>                             | <b>-</b>    |
| <b>BRA+CCA</b>                                 | <b>42.0</b> |
| <b>BRA+CCA Outcome</b>                         | <b>-</b>    |
| Score partition                                |             |
| <b>A. Biogeography/Historical</b>              | <b>24.0</b> |
| 1. Domestication/Cultivation                   | 4.0         |
| 2. Climate, distribution and introduction risk | 2.0         |
| 3. Invasive elsewhere                          | 18.0        |
| <b>B. Biology/Ecology</b>                      | <b>26.0</b> |
| 4. Undesirable (or persistence) traits         | 8.0         |
| 5. Resource exploitation                       | 7.0         |
| 6. Reproduction                                | 4.0         |
| 7. Dispersal mechanisms                        | 6.0         |
| 8. Tolerance attributes                        | 1.0         |
| <b>C. Climate change</b>                       | <b>-8.0</b> |
| 9. Climate change                              | -8.0        |
| Answered Questions                             |             |
| <b>Total</b>                                   | <b>55</b>   |
| <b>A. Biogeography/Historical</b>              | <b>13</b>   |
| 1. Domestication/Cultivation                   | 3           |
| 2. Climate, distribution and introduction risk | 5           |
| 3. Invasive elsewhere                          | 5           |
| <b>B. Biology/Ecology</b>                      | <b>36</b>   |
| 4. Undesirable (or persistence) traits         | 12          |
| 5. Resource exploitation                       | 2           |
| 6. Reproduction                                | 7           |
| 7. Dispersal mechanisms                        | 9           |
| 8. Tolerance attributes                        | 6           |
| <b>C. Climate change</b>                       | <b>6</b>    |
| 9. Climate change                              | 6           |
| Sectors affected                               |             |
| <b>Commercial</b>                              | <b>16</b>   |
| <b>Environmental</b>                           | <b>8</b>    |
| <b>Species or population nuisance traits</b>   | <b>22</b>   |

| Thresholds     |             |
|----------------|-------------|
| <b>BRA</b>     | <b>-</b>    |
| <b>BRA+CCA</b> | <b>-</b>    |
| Confidence     |             |
| <b>BRA+CCA</b> | <b>0.68</b> |
| <b>BRA</b>     | <b>0.70</b> |
| <b>CCA</b>     | <b>0.50</b> |

| Date and Time       |
|---------------------|
| 13/05/2022 18:43:43 |

## AS-ISK v2

| Taxon and Assessor details         |                                                                                                                             |
|------------------------------------|-----------------------------------------------------------------------------------------------------------------------------|
| Category                           | Fishes and Lampreys (freshwater)                                                                                            |
| Taxon name                         | <i>Sander lucioperca</i>                                                                                                    |
| Common name                        | pikeperch                                                                                                                   |
| Assessor                           | Tatia Kuljanishvili                                                                                                         |
| Risk screening context             |                                                                                                                             |
| Reason and socio-economic benefits | Sander lucioperca is native to the Black and Caspian Sea basins. This species was not recorded in                           |
| Risk assessment area               | South Caucasus                                                                                                              |
| Taxonomy                           | Actinopteri (ray-finned fishes) > Perciformes/Percoidei () > Percidae (Perches) > Luciopercinae                             |
| Native range                       | The Black and Caspian Sea basins                                                                                            |
| Introduced range                   | Aras River basin                                                                                                            |
| URL                                | <a href="https://www.fishbase.de/summary/Sander-lucioperca.html">https://www.fishbase.de/summary/Sander-lucioperca.html</a> |

|                                                |      | Response                                                                                                                                                                | Justification (references and/or other information) | Confidence                                                                                                                                                                                                                                                                                                                                                                                |           |
|------------------------------------------------|------|-------------------------------------------------------------------------------------------------------------------------------------------------------------------------|-----------------------------------------------------|-------------------------------------------------------------------------------------------------------------------------------------------------------------------------------------------------------------------------------------------------------------------------------------------------------------------------------------------------------------------------------------------|-----------|
| A. Biogeography/Historical                     |      |                                                                                                                                                                         |                                                     |                                                                                                                                                                                                                                                                                                                                                                                           |           |
| 1. Domestication/Cultivation                   |      |                                                                                                                                                                         |                                                     |                                                                                                                                                                                                                                                                                                                                                                                           |           |
| 1                                              | 1.01 | Has the taxon been the subject of domestication (or cultivation) for at least 20 generations?                                                                           | Yes                                                 | It is possible to produce this fish in aquaculture facilities                                                                                                                                                                                                                                                                                                                             | Very high |
| 2                                              | 1.02 | Is the taxon harvested in the wild and likely to be sold or used in its live form?                                                                                      | Yes                                                 | This species has importance as it is eatable and tasty. They are sold in its life forms.                                                                                                                                                                                                                                                                                                  | High      |
| 3                                              | 1.03 | Does the taxon have invasive races, varieties, sub-taxa or congeners?                                                                                                   | Yes                                                 | For example P. fluviatilis                                                                                                                                                                                                                                                                                                                                                                | High      |
| 2. Climate, distribution and introduction risk |      |                                                                                                                                                                         |                                                     |                                                                                                                                                                                                                                                                                                                                                                                           |           |
| 4                                              | 2.01 | How similar are the climatic conditions of the Risk Assessment (RA) area and the taxon's native range?                                                                  | High                                                | The climatic conditions are similar                                                                                                                                                                                                                                                                                                                                                       | Very high |
| 5                                              | 2.02 | What is the quality of the climate matching data?                                                                                                                       | Medium                                              | The quality of climate matching is low since there are no much stations in Armenia                                                                                                                                                                                                                                                                                                        | Very high |
| 6                                              | 2.03 | Is the taxon already present outside of captivity in the RA area?                                                                                                       | Yes                                                 | It has been caught in the Aras River at the Agarak-Megri district (Pipoyan & Tigranyan, 2002; Pipoyan, 2012), and was also recorded by Levin and Rubenyan (2010) in the Aras River. Though not officially reported, the repeated findings indicate the existence of established populations in Armenia                                                                                    | Very high |
| 7                                              | 2.04 | How many potential vectors could the taxon use to enter in the RA area?                                                                                                 | >1                                                  | Aquaculture, Recriation.                                                                                                                                                                                                                                                                                                                                                                  | High      |
| 8                                              | 2.05 | Is the taxon currently found in close proximity to, and likely to enter into, the RA area in the near future (e.g. unintentional and intentional introductions)?        | Yes                                                 | It has been caught in the Aras River at the Agarak-Megri district (Pipoyan & Tigranyan, 2002; Pipoyan, 2012), and was also recorded by Levin and Rubenyan (2010) in the Aras River. Though not officially reported, the repeated findings indicate the existence of established populations in Armenia                                                                                    | Very high |
| 3. Invasive elsewhere                          |      |                                                                                                                                                                         |                                                     |                                                                                                                                                                                                                                                                                                                                                                                           |           |
| 9                                              | 3.01 | Has the taxon become naturalised (established viable populations) outside its                                                                                           | Yes                                                 | Yes it has become naturalized outside its native area                                                                                                                                                                                                                                                                                                                                     | Very high |
| 10                                             | 3.02 | In the taxon's introduced range, are there known adverse impacts to wild stocks or commercial taxa?                                                                     | Yes                                                 | In Turkey it is known that it caused the extension of three endemics fish species (Crivelli 1995).                                                                                                                                                                                                                                                                                        | Very high |
| 11                                             | 3.03 | In the taxon's introduced range, are there known adverse impacts to aquaculture?                                                                                        | Yes                                                 | In France it caused the decline of sand smelt (Atherina boyeri) populations (Kiener 1968), In England it was main reason for waning of Cyprinids populations (Kell 1985; Manchester et al. 2000). because of this, S. lucioperca is considered as an invasive species (Fickling and Lee 1983).                                                                                            | Very high |
| 12                                             | 3.04 | In the taxon's introduced range, are there known adverse impacts to ecosystem                                                                                           | Yes                                                 | It can be transmissing diseases                                                                                                                                                                                                                                                                                                                                                           | Low       |
| 13                                             | 3.05 | In the taxon's introduced range, are there known adverse socio-economic impacts?                                                                                        | Yes                                                 | there is definetely adverse socio-economic impact, however this is not assessed<br><a href="https://nas.er.usgs.gov/queries/greatlakes/FactSheet.aspx?SpeciesID=65&amp;Potential=Y&amp;Type=2&amp;HUCNumber=DGreatLakes">https://nas.er.usgs.gov/queries/greatlakes/FactSheet.aspx?SpeciesID=65&amp;Potential=Y&amp;Type=2&amp;HUCNumber=DGreatLakes</a>                                  | Low       |
| B. Biology/Ecology                             |      |                                                                                                                                                                         |                                                     |                                                                                                                                                                                                                                                                                                                                                                                           |           |
| 4. Undesirable (or persistence) traits         |      |                                                                                                                                                                         |                                                     |                                                                                                                                                                                                                                                                                                                                                                                           |           |
| 14                                             | 4.01 | Is it likely that the taxon will be poisonous or pose other risks to human health?                                                                                      | No                                                  | Not poisonous                                                                                                                                                                                                                                                                                                                                                                             | Very high |
| 15                                             | 4.02 | Is it likely that the taxon will smother one or more native taxa (that are not threatened or protected)?                                                                | Yes                                                 | It is possible and it had happened that it caused extripation of some native taxa for example in Britain, Turkey                                                                                                                                                                                                                                                                          | High      |
| 16                                             | 4.03 | Are there any threatened or protected taxa that the non-native taxon would parasitise in the RA area?                                                                   | No                                                  | Does not parasite                                                                                                                                                                                                                                                                                                                                                                         | Very high |
| 17                                             | 4.04 | Is the taxon adaptable in terms of climatic and other environmental conditions, thus enhancing its potential persistence if it has invaded or could invade the RA area? | Yes                                                 | Can tolerate high temperatures up to 25 C Swirplies et al 2019, It can tolerate turbidity and eutrophication (Kottelat & Freyhof 2007) and salinity brackish and freshwaters (Kottelat & Freyhof 2007)                                                                                                                                                                                    | High      |
| 18                                             | 4.05 | Is the taxon likely to disrupt food-web structure/function in aquatic ecosystems if it has invaded or is likely to invade the RA area?                                  | Yes                                                 | In great lakes, this species has become the top predator and it is known that has forgagin behaviour in the area<br><a href="https://nas.er.usgs.gov/queries/greatlakes/FactSheet.aspx?SpeciesID=65&amp;Potential=Y&amp;Type=2&amp;HUCNumber=DGreatLakes">https://nas.er.usgs.gov/queries/greatlakes/FactSheet.aspx?SpeciesID=65&amp;Potential=Y&amp;Type=2&amp;HUCNumber=DGreatLakes</a> | Very high |
| 19                                             | 4.06 | Is the taxon likely to exert adverse impacts on ecosystem services in the RA area?                                                                                      | Yes                                                 | Can affect aquaculture production, and be transmitting deseasaes and parasites                                                                                                                                                                                                                                                                                                            | Medium    |
| 20                                             | 4.07 | Is it likely that the taxon will host, and/or act as a vector for, recognised pests and infectious agents that are endemic in the RA                                    | Yes                                                 | Can be, however it is not documented                                                                                                                                                                                                                                                                                                                                                      | High      |

|                                 |      |                                                                                                                                                                              |     |                                                                                                                                                                                                                                                                                                                                                                                                                                              |           |
|---------------------------------|------|------------------------------------------------------------------------------------------------------------------------------------------------------------------------------|-----|----------------------------------------------------------------------------------------------------------------------------------------------------------------------------------------------------------------------------------------------------------------------------------------------------------------------------------------------------------------------------------------------------------------------------------------------|-----------|
| 21                              | 4.08 | Is it likely that the taxon will host, and/or act as a vector for, recognised pests and infectious agents that are absent from (novel to) the RA area?                       | Yes | Can be, however it is not documented                                                                                                                                                                                                                                                                                                                                                                                                         | High      |
| 22                              | 4.09 | Is it likely that the taxon will achieve a body size that will make it more likely to be released from captivity?                                                            | Yes | This taxon can achieve very large sizes An individual weighing 19 kg was reportedly caught in 1959 in Starnberger, Bavaria, Germany (Peter Adamicka, pers. Comm. E-mail: peter.adamicka@oeaw.ac.at)                                                                                                                                                                                                                                          | Very high |
| 23                              | 4.10 | Is the taxon capable of sustaining itself in a range of water velocity conditions (e.g. versatile in habitat use)?                                                           | Yes | It can live in ponds, estuaries or rivers (Kottelat & Freyhof 2007)                                                                                                                                                                                                                                                                                                                                                                          | High      |
| 24                              | 4.11 | Is it likely that the taxon's mode of existence (e.g. excretion of by-products) or behaviours (e.g. feeding) will reduce habitat quality for native taxa?                    | No  | Yes it has become naturalized outside its native area                                                                                                                                                                                                                                                                                                                                                                                        | Medium    |
| 25                              | 4.12 | Is the taxon likely to maintain a viable population even when present in low densities (or persisting in adverse conditions by way of a dormant form)?                       | Yes | Yes (Poulet et al 2009)                                                                                                                                                                                                                                                                                                                                                                                                                      | High      |
| <b>5. Resource exploitation</b> |      |                                                                                                                                                                              |     |                                                                                                                                                                                                                                                                                                                                                                                                                                              |           |
| 26                              | 5.01 | Is the taxon likely to consume threatened or protected native taxa in the RA area?                                                                                           | Yes | In great lakes, this species has become the top predator and it is known that has foraging behaviour in the area and consumes protected or threatened native fishes<br><a href="https://nas.er.usgs.gov/queries/greatlakes/FactSheet.aspx?SpeciesID=65&amp;Potential=Y&amp;Type=2&amp;HUCNumber=DGreatLakes">https://nas.er.usgs.gov/queries/greatlakes/FactSheet.aspx?SpeciesID=65&amp;Potential=Y&amp;Type=2&amp;HUCNumber=DGreatLakes</a> | Very high |
| 27                              | 5.02 | Is the taxon likely to sequester food resources (including nutrients) to the detriment of native taxa in the RA area?                                                        | Yes | This taxon is known to expose foraging behaviour that might reduce food availability to other piscivorous species in the area through competition, however there is no information if it can sequester nutrients minerals trace elements                                                                                                                                                                                                     | Medium    |
| <b>6. Reproduction</b>          |      |                                                                                                                                                                              |     |                                                                                                                                                                                                                                                                                                                                                                                                                                              |           |
| 28                              | 6.01 | Is the taxon likely to exhibit parental care and/or to reduce age-at-maturity in response to environmental conditions?                                                       | Yes | Males defend their nests and fans the eggs (Kottelat & Freyhof 2007)                                                                                                                                                                                                                                                                                                                                                                         | Very high |
| 29                              | 6.02 | Is the taxon likely to produce viable gametes or propagules (in the RA area)?                                                                                                | Yes | the conditions for maturation and reproduction are available in the RA area                                                                                                                                                                                                                                                                                                                                                                  | High      |
| 30                              | 6.03 | Is the taxon likely to hybridise naturally with native taxa?                                                                                                                 | Yes | It has been hybridising with native <i>S. volgensis</i> (Manchester & Bullock 2000)                                                                                                                                                                                                                                                                                                                                                          | High      |
| 31                              | 6.04 | Is the taxon likely to be hermaphroditic or to display asexual reproduction?                                                                                                 | No  | No. Does not display asexual reproduction                                                                                                                                                                                                                                                                                                                                                                                                    | Very high |
| 32                              | 6.05 | Is the taxon dependent on the presence of another taxon (or specific habitat features) to complete its life cycle?                                                           | No  | No. Does not display asexual reproduction                                                                                                                                                                                                                                                                                                                                                                                                    | Very high |
| 33                              | 6.06 | Is the taxon known (or likely) to produce a large number of propagules or offspring within a short time span (e.g. < 1 year)?                                                | Yes | The relative fecundity varies from the minimum of 48 to the maximum of 467 eggs per 1 g of the female (Erm 1961; Gaygalas & Gyarlulaytis 1974). On average, it is between 150 and 400 eggs.                                                                                                                                                                                                                                                  | High      |
| 34                              | 6.07 | How many time units (days, months, years) does the taxon require to reach the age-at-first-reproduction?                                                                     | 4   | 4 years                                                                                                                                                                                                                                                                                                                                                                                                                                      | Very high |
| <b>7. Dispersal mechanisms</b>  |      |                                                                                                                                                                              |     |                                                                                                                                                                                                                                                                                                                                                                                                                                              |           |
| 35                              | 7.01 | How many potential internal vectors/pathways could the taxon use to disperse within the RA area (with suitable)                                                              | > 1 | Aquaculture, ecriational fisheries, Self-dispersad                                                                                                                                                                                                                                                                                                                                                                                           | Very high |
| 36                              | 7.02 | Will any of these vectors/pathways bring the taxon in close proximity to one or more protected areas (e.g. MCZ, MPA, SSSI)?                                                  | Yes | it is possible                                                                                                                                                                                                                                                                                                                                                                                                                               | High      |
| 37                              | 7.03 | Does the taxon have a means of actively attaching itself to hard substrata (e.g. ship hulls, pilings, buoys) such that it enhances the likelihood of dispersal?              | No  | No. Morphologically this species does not have a means of actively attaching itself to hard substrata                                                                                                                                                                                                                                                                                                                                        | Very high |
| 38                              | 7.04 | Is natural dispersal of the taxon likely to occur as eggs (for animals) or as propagules (for plants: seeds, spores) in the RA area?                                         | No  | No. can not be distributed as eggs.                                                                                                                                                                                                                                                                                                                                                                                                          | Very high |
| 39                              | 7.05 | Is natural dispersal of the taxon likely to occur as larvae/juveniles (for animals) or as fragments/seedlings (for plants) in the RA area?                                   | Yes | It is possible                                                                                                                                                                                                                                                                                                                                                                                                                               | Medium    |
| 40                              | 7.06 | Are older life stages of the taxon likely to migrate in the RA area for reproduction?                                                                                        | Yes | This fish migrates for reproduction                                                                                                                                                                                                                                                                                                                                                                                                          | Very high |
| 41                              | 7.07 | Are propagules or eggs of the taxon likely to be dispersed in the RA area by other animals?                                                                                  | No  | No. Can not be dispersed by other animals                                                                                                                                                                                                                                                                                                                                                                                                    | Very high |
| 42                              | 7.08 | Is dispersal of the taxon along any of the vectors/pathways mentioned in the previous seven questions (35-41; i.e. both unintentional or intentional) likely to be           | Yes | Yes all these vectors seem to be rapid                                                                                                                                                                                                                                                                                                                                                                                                       | High      |
| 43                              | 7.09 | Is dispersal of the taxon density dependent?                                                                                                                                 | Yes | Since these species are territorial one might assume their dispersal is density dependent                                                                                                                                                                                                                                                                                                                                                    | Medium    |
| <b>8. Tolerance attributes</b>  |      |                                                                                                                                                                              |     |                                                                                                                                                                                                                                                                                                                                                                                                                                              |           |
| 44                              | 8.01 | Is the taxon able to withstand being out of water for extended periods (e.g. minimum of one or more hours) at some stage of its life cycle?                                  | No  | No information available                                                                                                                                                                                                                                                                                                                                                                                                                     | Medium    |
| 45                              | 8.02 | Is the taxon tolerant of a wide range of water quality conditions relevant to that taxon? [In the Justification field, indicate the relevant water quality variable(s) being | Yes | turbidity, eutrophication, salinity                                                                                                                                                                                                                                                                                                                                                                                                          | Medium    |



|                          |      |                                                                                                                                                              |           |                                                                                                                                                                                                                                                                                                                                                                                                                                                                                                       |           |
|--------------------------|------|--------------------------------------------------------------------------------------------------------------------------------------------------------------|-----------|-------------------------------------------------------------------------------------------------------------------------------------------------------------------------------------------------------------------------------------------------------------------------------------------------------------------------------------------------------------------------------------------------------------------------------------------------------------------------------------------------------|-----------|
| 46                       | 8.03 | Can the taxon be controlled or eradicated in the wild with chemical, biological, or other agents/means?                                                      | No        | No. This is less likely.                                                                                                                                                                                                                                                                                                                                                                                                                                                                              | High      |
| 47                       | 8.04 | Is the taxon likely to tolerate or benefit from environmental/human disturbance?                                                                             | No        | No information                                                                                                                                                                                                                                                                                                                                                                                                                                                                                        | Low       |
| 48                       | 8.05 | Is the taxon able to tolerate salinity levels that are higher or lower than those found in its usual environment?                                            | Yes       | Yes (KrystynaDemska-Zakęś et al 2021)                                                                                                                                                                                                                                                                                                                                                                                                                                                                 | Very high |
| 49                       | 8.06 | Are there effective natural enemies (predators) of the taxon present in the RA                                                                               | No        | No effective natural enemies present in RA area                                                                                                                                                                                                                                                                                                                                                                                                                                                       | Very high |
| <b>C. Climate change</b> |      |                                                                                                                                                              |           |                                                                                                                                                                                                                                                                                                                                                                                                                                                                                                       |           |
| <b>9. Climate change</b> |      |                                                                                                                                                              |           |                                                                                                                                                                                                                                                                                                                                                                                                                                                                                                       |           |
| 50                       | 9.01 | Under the predicted future climatic conditions, are the risks of entry into the RA area posed by the taxon likely to increase, decrease or not change?       | Increase  | It was hypotheses that climate change might alert the mechanisms of transportation and introduction of non-native species. Commercial and recreational activities will increase, that itself increases the propagule pressure levels of non-native                                                                                                                                                                                                                                                    | Very high |
| 51                       | 9.02 | Under the predicted future climatic conditions, are the risks of establishment posed by the taxon likely to increase, decrease or not change?                | Increase  | Increased temperatures do not seem to be an obstacle for this species survival. In addition increased temperatures will cause this species establish in higher altitudes                                                                                                                                                                                                                                                                                                                              | High      |
| 52                       | 9.03 | Under the predicted future climatic conditions, are the risks of dispersal within the RA area posed by the taxon likely to increase, decrease or not change? | Increase  | With increased propagule pressure and resource availability the risks of their dispersal are increasing                                                                                                                                                                                                                                                                                                                                                                                               | Very high |
| 53                       | 9.04 | Under the predicted future climatic conditions, what is the likely magnitude of future potential impacts on biodiversity and/or ecological integrity/status? | Higher    | Population densities will increase making them on one hand impossible to eradicate and on the other hand, affecting native organisms due to competition, that does not leave much resources for native ones.                                                                                                                                                                                                                                                                                          | Very high |
| 54                       | 9.05 | Under the predicted future climatic conditions, what is the likely magnitude of future potential impacts on ecosystem structure and/or function?             | No change | Difficult to assume                                                                                                                                                                                                                                                                                                                                                                                                                                                                                   | Low       |
| 55                       | 9.06 | Under the predicted future climatic conditions, what is the likely magnitude of future potential impacts on ecosystem services/socio-economic factors?       | Higher    | Under the predicted future climatic conditions, this species will disperse even wider, that will itself create the problem for native aquatic organisms. The widespread and abundance of this fish which is quite adaptive and plastic to different environmental conditions, will increase its impact on ecosystem services and socio-economic factors. For example: transmission of diseases, foraging behaviour and species adaptability It can also affect aquaculture and recreational fisheries | Very high |

| Statistics                                     |      |
|------------------------------------------------|------|
| Scores                                         |      |
| BRA                                            | 49.0 |
| BRA Outcome                                    | -    |
| BRA+CCA                                        | 59.0 |
| BRA+CCA Outcome                                | -    |
| Score partition                                |      |
| A. Biogeography/Historical                     | 24.0 |
| 1. Domestication/Cultivation                   | 4.0  |
| 2. Climate, distribution and introduction risk | 2.0  |
| 3. Invasive elsewhere                          | 18.0 |
| B. Biology/Ecology                             | 25.0 |
| 4. Undesirable (or persistence) traits         | 9.0  |
| 5. Resource exploitation                       | 7.0  |
| 6. Reproduction                                | 3.0  |
| 7. Dispersal mechanisms                        | 3.0  |
| 8. Tolerance attributes                        | 3.0  |
| C. Climate change                              | 10.0 |
| 9. Climate change                              | 10.0 |
| Answered Questions                             |      |
| Total                                          | 55   |
| A. Biogeography/Historical                     | 13   |
| 1. Domestication/Cultivation                   | 3    |
| 2. Climate, distribution and introduction risk | 5    |
| 3. Invasive elsewhere                          | 5    |
| B. Biology/Ecology                             | 36   |
| 4. Undesirable (or persistence) traits         | 12   |
| 5. Resource exploitation                       | 2    |
| 6. Reproduction                                | 7    |
| 7. Dispersal mechanisms                        | 9    |
| 8. Tolerance attributes                        | 6    |
| C. Climate change                              | 6    |
| 9. Climate change                              | 6    |
| Sectors affected                               |      |
| Commercial                                     | 21   |
| Environmental                                  | 14   |
| Species or population nuisance traits          | 29   |

| Thresholds |      |
|------------|------|
| BRA        | -    |
| BRA+CCA    | -    |
| Confidence |      |
| BRA+CCA    | 0.81 |
| BRA        | 0.81 |

|     |      |
|-----|------|
| CCA | 0.83 |
|-----|------|

|                     |
|---------------------|
| Date and Time       |
| 22/05/2022 15:54:15 |

## AS-ISK v2

| Taxon and Assessor details         |                                                                                                                               |
|------------------------------------|-------------------------------------------------------------------------------------------------------------------------------|
| Category                           | Fishes and Lampreys (freshwater)                                                                                              |
| Taxon name                         | <i>Syngnathus abaster</i>                                                                                                     |
| Common name                        | black-striped pipefish                                                                                                        |
| Assessor                           | Bella Japoshvili                                                                                                              |
| Risk screening context             |                                                                                                                               |
| Reason and socio-economic benefits | The species is has some recreational value and due to this reason is translocated from its native                             |
| Risk assessment area               | South Caucasus                                                                                                                |
| Taxonomy                           | Actinopteri (ray-finned fishes) > Syngnathiformes (Pipefishes and seahorses) > Syngnathidae                                   |
| Native range                       | Mediterranean basin                                                                                                           |
| Introduced range                   | Caspian Sea basin                                                                                                             |
| URL                                | <a href="https://www.fishbase.de/summary/Syngnathus-abaster.html">https://www.fishbase.de/summary/Syngnathus-abaster.html</a> |

|                                                |      | Response                                                                                                                                                                | Justification (references and/or other information) | Confidence                                                                                                                                                                                                            |           |
|------------------------------------------------|------|-------------------------------------------------------------------------------------------------------------------------------------------------------------------------|-----------------------------------------------------|-----------------------------------------------------------------------------------------------------------------------------------------------------------------------------------------------------------------------|-----------|
| A. Biogeography/Historical                     |      |                                                                                                                                                                         |                                                     |                                                                                                                                                                                                                       |           |
| 1. Domestication/Cultivation                   |      |                                                                                                                                                                         |                                                     |                                                                                                                                                                                                                       |           |
| 1                                              | 1.01 | Has the taxon been the subject of domestication (or cultivation) for at least 20 generations?                                                                           | No                                                  | Species is not cultured for aquacultural purpose nor as ornamental fish.                                                                                                                                              | Very high |
| 2                                              | 1.02 | Is the taxon harvested in the wild and likely to be sold or used in its live form?                                                                                      | No                                                  | Less possible and such case have not yet recorded                                                                                                                                                                     | Very high |
| 3                                              | 1.03 | Does the taxon have invasive races, varieties, sub-taxa or congeners?                                                                                                   | No                                                  | No other invasive race or congeners have ever reported                                                                                                                                                                | High      |
| 2. Climate, distribution and introduction risk |      |                                                                                                                                                                         |                                                     |                                                                                                                                                                                                                       |           |
| 4                                              | 2.01 | How similar are the climatic conditions of the Risk Assessment (RA) area and the taxon's native range?                                                                  | High                                                | Kuljanishvili, T., Patoka, J., Bohatá, L., Rylková, K., Japoshvili, B., & Kalous, L. (2021). Evaluation of the potential establishment of black-striped pipefish transferred by cultural drivers. Inland              | Medium    |
| 5                                              | 2.02 | What is the quality of the climate matching data?                                                                                                                       | Medium                                              | Kuljanishvili, T., Patoka, J., Bohatá, L., Rylková, K., Japoshvili, B., & Kalous, L. (2021). Evaluation of the potential establishment of black-striped pipefish transferred by cultural drivers. Inland              | Medium    |
| 6                                              | 2.03 | Is the taxon already present outside of captivity in the RA area?                                                                                                       | Yes                                                 | Kuljanishvili, T., Patoka, J., Bohatá, L., Rylková, K., Japoshvili, B., & Kalous, L. (2021). Evaluation of the potential establishment of black-striped pipefish transferred by cultural drivers. Inland              | Very high |
| 7                                              | 2.04 | How many potential vectors could the taxon use to enter in the RA area?                                                                                                 | One                                                 | Translocation for recreational purpose                                                                                                                                                                                | High      |
| 8                                              | 2.05 | Is the taxon currently found in close proximity to, and likely to enter into, the RA area in the near future (e.g. unintentional and intentional introductions)?        | No                                                  | Kuljanishvili, T., Patoka, J., Bohatá, L., Rylková, K., Japoshvili, B., & Kalous, L. (2021). Evaluation of the potential establishment of black-striped pipefish transferred by cultural drivers. Inland Waters, 1-8. | Very high |
| 3. Invasive elsewhere                          |      |                                                                                                                                                                         |                                                     |                                                                                                                                                                                                                       |           |
| 9                                              | 3.01 | Has the taxon become naturalised (established viable populations) outside its native range?                                                                             | Yes                                                 | Kuljanishvili, T., Patoka, J., Bohatá, L., Rylková, K., Japoshvili, B., & Kalous, L. (2021). Evaluation of the potential establishment of black-striped pipefish transferred by cultural drivers. Inland              | Very high |
| 10                                             | 3.02 | In the taxon's introduced range, are there known adverse impacts to wild stocks or commercial taxa?                                                                     | No                                                  | Not reported such an effect                                                                                                                                                                                           | Very high |
| 11                                             | 3.03 | In the taxon's introduced range, are there known adverse impacts to aquaculture?                                                                                        | No                                                  | Not ever recorded such an effect                                                                                                                                                                                      | Very high |
| 12                                             | 3.04 | In the taxon's introduced range, are there known adverse impacts to ecosystem                                                                                           | No                                                  | Not ever recorded such an effect                                                                                                                                                                                      | Very high |
| 13                                             | 3.05 | In the taxon's introduced range, are there known adverse socio-economic impacts?                                                                                        | No                                                  | Not ever recorded such an effect                                                                                                                                                                                      | Very high |
| B. Biology/Ecology                             |      |                                                                                                                                                                         |                                                     |                                                                                                                                                                                                                       |           |
| 4. Undesirable (or persistence) traits         |      |                                                                                                                                                                         |                                                     |                                                                                                                                                                                                                       |           |
| 14                                             | 4.01 | Is it likely that the taxon will be poisonous or pose other risks to human health?                                                                                      | No                                                  | Not a harmful species                                                                                                                                                                                                 | Very high |
| 15                                             | 4.02 | Is it likely that the taxon will smother one or more native taxa (that are not threatened or protected)?                                                                | Yes                                                 | Based on professional judgement, it can reach to much density so that can suppress some other fishes though no documented evidence exists                                                                             | Low       |
| 16                                             | 4.03 | Are there any threatened or protected taxa that the non-native taxon would parasitise in the RA area?                                                                   | No                                                  | Not a parasitic nor predator species                                                                                                                                                                                  | High      |
| 17                                             | 4.04 | Is the taxon adaptable in terms of climatic and other environmental conditions, thus enhancing its potential persistence if it has invaded or could invade the RA area? | Yes                                                 | Can survive and reproduce in marin, brackish and freshwaters.                                                                                                                                                         | Very high |
| 18                                             | 4.05 | Is the taxon likely to disrupt food-web structure/function in aquatic ecosystems if it has invaded or is likely to invade the RA                                        | Yes                                                 | Possible though not a documented evidence                                                                                                                                                                             | Low       |
| 19                                             | 4.06 | Is the taxon likely to exert adverse impacts on ecosystem services in the RA area?                                                                                      | No                                                  | Professional judgement                                                                                                                                                                                                | Medium    |
| 20                                             | 4.07 | Is it likely that the taxon will host, and/or act as a vector for, recognised pests and infectious agents that are endemic in the RA                                    | No                                                  | No such a pests/infectious agents are known                                                                                                                                                                           | Low       |
| 21                                             | 4.08 | Is it likely that the taxon will host, and/or act as a vector for, recognised pests and infectious agents that are absent from (novel to) the RA area?                  | Yes                                                 | Professional judgement                                                                                                                                                                                                | Medium    |
| 22                                             | 4.09 | Is it likely that the taxon will achieve a body size that will make it more likely to be released from captivity?                                                       | No                                                  | Small bodied species                                                                                                                                                                                                  | Very high |

|                                 |      |                                                                                                                                                                              |     |                                                                                                                                                                                                                                                                                      |           |
|---------------------------------|------|------------------------------------------------------------------------------------------------------------------------------------------------------------------------------|-----|--------------------------------------------------------------------------------------------------------------------------------------------------------------------------------------------------------------------------------------------------------------------------------------|-----------|
| 23                              | 4.10 | Is the taxon capable of sustaining itself in a range of water velocity conditions (e.g. versatile in habitat use)?                                                           | No  | Lives in lentic systems                                                                                                                                                                                                                                                              | High      |
| 24                              | 4.11 | Is it likely that the taxon's mode of existence (e.g. excretion of by-products) or behaviours (e.g. feeding) will reduce habitat quality for native taxa?                    | Yes | Professional judgement, no documented evidence. It can reach high density and can produce large amount of excretion product                                                                                                                                                          | Low       |
| 25                              | 4.12 | Is the taxon likely to maintain a viable population even when present in low densities (or persisting in adverse conditions by way of a dormant form)?                       | Yes | Professional judgement, no documented evidence                                                                                                                                                                                                                                       | Medium    |
| <b>5. Resource exploitation</b> |      |                                                                                                                                                                              |     |                                                                                                                                                                                                                                                                                      |           |
| 26                              | 5.01 | Is the taxon likely to consume threatened or protected native taxa in the RA area?                                                                                           | No  | Professional judgement, no documented evidence (consumes only zooplankton - Didenko, A., Kruzhylina, S., & Gurbyk, A. (2018). Feeding patterns of the black-striped pipefish Syngnathus abaster in an invaded freshwater habitat. Environmental Biology of Fishes, 101(6), 917-931.) | High      |
| 27                              | 5.02 | Is the taxon likely to sequester food resources (including nutrients) to the detriment of native taxa in the RA area?                                                        | Yes | Didenko, A., Kruzhylina, S., & Gurbyk, A. (2018). Feeding patterns of the black-striped pipefish Syngnathus abaster in an invaded freshwater habitat. Environmental Biology of Fishes,                                                                                               | Low       |
| <b>6. Reproduction</b>          |      |                                                                                                                                                                              |     |                                                                                                                                                                                                                                                                                      |           |
| 28                              | 6.01 | Is the taxon likely to exhibit parental care and/or to reduce age-at-maturity in response to environmental conditions?                                                       | Yes | Herald, E. S. (1959). From pipefish to seahorse – a study of phylogenetic relationships. Proceedings of the Californian Academy of Sciences 29, 465–473                                                                                                                              | Very high |
| 29                              | 6.02 | Is the taxon likely to produce viable gametes or propagules (in the RA area)?                                                                                                | Yes | Kuljanishvili, T., Patoka, J., Bohatá, L., Rylková, K., Japoshvili, B., & Kalous, L. (2021). Evaluation of the potential establishment of black-striped pipefish transferred by cultural drivers. Inland                                                                             | Very high |
| 30                              | 6.03 | Is the taxon likely to hybridise naturally with native taxa?                                                                                                                 | No  | Not expected, no such an evidence is known                                                                                                                                                                                                                                           | Very high |
| 31                              | 6.04 | Is the taxon likely to be hermaphroditic or to display asexual reproduction?                                                                                                 | No  | Sexually reproducing species                                                                                                                                                                                                                                                         | High      |
| 32                              | 6.05 | Is the taxon dependent on the presence of another taxon (or specific habitat features) to complete its life cycle?                                                           | No  | It can complete its lifecycle independently                                                                                                                                                                                                                                          | Very high |
| 33                              | 6.06 | Is the taxon known (or likely) to produce a large number of propagules or offspring within a short time span (e.g. < 1 year)?                                                | No  | Kottelat, M., & Freyhof, J. (2007). Handbook of European freshwater fishes. Publications Kottelat.                                                                                                                                                                                   | Very high |
| 34                              | 6.07 | How many time units (days, months, years) does the taxon require to reach the age-at-first-reproduction?                                                                     | 1   | Years                                                                                                                                                                                                                                                                                | High      |
| <b>7. Dispersal mechanisms</b>  |      |                                                                                                                                                                              |     |                                                                                                                                                                                                                                                                                      |           |
| 35                              | 7.01 | How many potential internal vectors/pathways could the taxon use to disperse within the RA area (with suitable)                                                              | One | Recreational purpose, independently through watercurrent                                                                                                                                                                                                                             | High      |
| 36                              | 7.02 | Will any of these vectors/pathways bring the taxon in close proximity to one or more protected areas (e.g. MCZ, MPA, SSSI)?                                                  | No  | No PAs in the respective areas of RA area                                                                                                                                                                                                                                            | High      |
| 37                              | 7.03 | Does the taxon have a means of actively attaching itself to hard substrata (e.g. ship hulls, pilings, buoys) such that it enhances the likelihood of dispersal?              | No  | No such an evidence is known                                                                                                                                                                                                                                                         | Very high |
| 38                              | 7.04 | Is natural dispersal of the taxon likely to occur as eggs (for animals) or as propagules (for plants: seeds, spores) in the RA area?                                         | No  | Nos such an evidence is known                                                                                                                                                                                                                                                        | High      |
| 39                              | 7.05 | Is natural dispersal of the taxon likely to occur as larvae/juveniles (for animals) or as fragments/seedlings (for plants) in the RA area?                                   | Yes | It naturally spreading. e.g Didenko, A., Kruzhylina, S., & Gurbyk, A. (2018). Feeding patterns of the black-striped pipefish Syngnathus abaster in an invaded freshwater habitat. Environmental Biology of Fishes, 101(6), 917-931.                                                  | Medium    |
| 40                              | 7.06 | Are older life stages of the taxon likely to migrate in the RA area for reproduction?                                                                                        | No  | Less possible based on professional experience                                                                                                                                                                                                                                       | High      |
| 41                              | 7.07 | Are propagules or eggs of the taxon likely to be dispersed in the RA area by other animals?                                                                                  | No  | Nos such an evidence is known                                                                                                                                                                                                                                                        | Very high |
| 42                              | 7.08 | Is dispersal of the taxon along any of the vectors/pathways mentioned in the previous seven questions (35–41; i.e. both unintentional or intentional) likely to be           | No  | Based on professional judgement                                                                                                                                                                                                                                                      | Medium    |
| 43                              | 7.09 | Is dispersal of the taxon density dependent?                                                                                                                                 | No  | Based on professional judgement, no documented evidence                                                                                                                                                                                                                              | Medium    |
| <b>8. Tolerance attributes</b>  |      |                                                                                                                                                                              |     |                                                                                                                                                                                                                                                                                      |           |
| 44                              | 8.01 | Is the taxon able to withstand being out of water for extended periods (e.g. minimum of one or more hours) at some stage of its life cycle?                                  | Yes | Based on professional judgement                                                                                                                                                                                                                                                      | Medium    |
| 45                              | 8.02 | Is the taxon tolerant of a wide range of water quality conditions relevant to that taxon? [In the Justification field, indicate the relevant water quality variable(s) being | Yes | Based on professional judgement                                                                                                                                                                                                                                                      | Very high |
| 46                              | 8.03 | Can the taxon be controlled or eradicated in the wild with chemical, biological, or other agents/means?                                                                      | No  | No documented evidence                                                                                                                                                                                                                                                               | Medium    |
| 47                              | 8.04 | Is the taxon likely to tolerate or benefit from environmental/human disturbance?                                                                                             | No  | No such an evidence exists                                                                                                                                                                                                                                                           | Low       |
| 48                              | 8.05 | Is the taxon able to tolerate salinity levels that are higher or lower than those found in its usual environment?                                                            | Yes | Based on professional judgement                                                                                                                                                                                                                                                      | Very high |

|                          |      |                                                                                                                                                              |           |                                 |        |
|--------------------------|------|--------------------------------------------------------------------------------------------------------------------------------------------------------------|-----------|---------------------------------|--------|
| 49                       | 8.06 | Are there effective natural enemies (predators) of the taxon present in the RA                                                                               | No        | Based on professional judgement | Medium |
| <b>C. Climate change</b> |      |                                                                                                                                                              |           |                                 |        |
| <b>9. Climate change</b> |      |                                                                                                                                                              |           |                                 |        |
| 50                       | 9.01 | Under the predicted future climatic conditions, are the risks of entry into the RA area posed by the taxon likely to increase, decrease or not change?       | No change | Based on professional judgement | High   |
| 51                       | 9.02 | Under the predicted future climatic conditions, are the risks of establishment posed by the taxon likely to increase, decrease or not change?                | No change | Based on professional judgement | High   |
| 52                       | 9.03 | Under the predicted future climatic conditions, are the risks of dispersal within the RA area posed by the taxon likely to increase, decrease or not change? | No change | Based on professional judgement | Medium |
| 53                       | 9.04 | Under the predicted future climatic conditions, what is the likely magnitude of future potential impacts on biodiversity and/or ecological integrity/status? | Higher    | Based on professional judgement | Medium |
| 54                       | 9.05 | Under the predicted future climatic conditions, what is the likely magnitude of future potential impacts on ecosystem structure and/or function?             | Higher    | Based on professional judgement | Medium |
| 55                       | 9.06 | Under the predicted future climatic conditions, what is the likely magnitude of future potential impacts on ecosystem services/socio-economic factors?       | Higher    | Based on professional judgement | Medium |

| Statistics                                     |             |
|------------------------------------------------|-------------|
| Scores                                         |             |
| <b>BRA</b>                                     | <b>13.0</b> |
| <b>BRA Outcome</b>                             | <b>-</b>    |
| <b>BRA+CCA</b>                                 | <b>19.0</b> |
| <b>BRA+CCA Outcome</b>                         | <b>-</b>    |
| Score partition                                |             |
| <b>A. Biogeography/Historical</b>              | <b>1.0</b>  |
| 1. Domestication/Cultivation                   | -2.0        |
| 2. Climate, distribution and introduction risk | 1.0         |
| 3. Invasive elsewhere                          | 2.0         |
| <b>B. Biology/Ecology</b>                      | <b>12.0</b> |
| 4. Undesirable (or persistence) traits         | 6.0         |
| 5. Resource exploitation                       | 2.0         |
| 6. Reproduction                                | 2.0         |
| 7. Dispersal mechanisms                        | -3.0        |
| 8. Tolerance attributes                        | 5.0         |
| <b>C. Climate change</b>                       | <b>6.0</b>  |
| 9. Climate change                              | 6.0         |
| Answered Questions                             |             |
| <b>Total</b>                                   | <b>55</b>   |
| <b>A. Biogeography/Historical</b>              | <b>13</b>   |
| 1. Domestication/Cultivation                   | 3           |
| 2. Climate, distribution and introduction risk | 5           |
| 3. Invasive elsewhere                          | 5           |
| <b>B. Biology/Ecology</b>                      | <b>36</b>   |
| 4. Undesirable (or persistence) traits         | 12          |
| 5. Resource exploitation                       | 2           |
| 6. Reproduction                                | 7           |
| 7. Dispersal mechanisms                        | 9           |
| 8. Tolerance attributes                        | 6           |
| <b>C. Climate change</b>                       | <b>6</b>    |
| 9. Climate change                              | 6           |
| Sectors affected                               |             |
| <b>Commercial</b>                              | <b>2</b>    |
| <b>Environmental</b>                           | <b>6</b>    |
| <b>Species or population nuisance traits</b>   | <b>12</b>   |

| Thresholds     |             |
|----------------|-------------|
| <b>BRA</b>     | <b>-</b>    |
| <b>BRA+CCA</b> | <b>-</b>    |
| Confidence     |             |
| <b>BRA+CCA</b> | <b>0.72</b> |
| <b>BRA</b>     | <b>0.74</b> |
| <b>CCA</b>     | <b>0.58</b> |

| Date and Time       |
|---------------------|
| 16/05/2022 23:26:47 |

AS-ISK v2

| Taxon and Assessor details         |                                                                                                                               |
|------------------------------------|-------------------------------------------------------------------------------------------------------------------------------|
| Category                           | Fishes and Lampreys (freshwater)                                                                                              |
| Taxon name                         | <i>Syngnathus abaster</i>                                                                                                     |
| Common name                        | black-striped pipefish                                                                                                        |
| Assessor                           | Giorgi Epatashvili                                                                                                            |
| Risk screening context             |                                                                                                                               |
| Reason and socio-economic benefits | The black-striped pipefish is a species of fish in the family Syngnathidae. Syngnathids are                                   |
| Risk assessment area               | South Caucasus                                                                                                                |
| Taxonomy                           | <i>Syngnathus abaster</i> Risso 1827                                                                                          |
| Native range                       | <i>S. abaster</i> found in the eastern Atlantic from the southern Gulf of Biscay to Gibraltar, also in the                    |
| Introduced range                   | As the introduced species it is mentioned in the Caspian Sea and fresh waters of its basin.                                   |
| URL                                | <a href="https://www.fishbase.se/summary/Syngnathus-abaster.html">https://www.fishbase.se/summary/Syngnathus-abaster.html</a> |

|                                                |      |                                                                                                                                                                         | Response | Justification (references and/or other information)                                                                                                                                                                                                                                                                                                                                                                                                                                                                                                                                                | Confidence |
|------------------------------------------------|------|-------------------------------------------------------------------------------------------------------------------------------------------------------------------------|----------|----------------------------------------------------------------------------------------------------------------------------------------------------------------------------------------------------------------------------------------------------------------------------------------------------------------------------------------------------------------------------------------------------------------------------------------------------------------------------------------------------------------------------------------------------------------------------------------------------|------------|
| A. Biogeography/Historical                     |      |                                                                                                                                                                         |          |                                                                                                                                                                                                                                                                                                                                                                                                                                                                                                                                                                                                    |            |
| 1. Domestication/Cultivation                   |      |                                                                                                                                                                         |          |                                                                                                                                                                                                                                                                                                                                                                                                                                                                                                                                                                                                    |            |
| 1                                              | 1.01 | Has the taxon been the subject of domestication (or cultivation) for at least 20 generations?                                                                           | No       | This species does not have commercial value                                                                                                                                                                                                                                                                                                                                                                                                                                                                                                                                                        | Medium     |
| 2                                              | 1.02 | Is the taxon harvested in the wild and likely to be sold or used in its live form?                                                                                      | No       | This species does not have commercial value                                                                                                                                                                                                                                                                                                                                                                                                                                                                                                                                                        | Medium     |
| 3                                              | 1.03 | Does the taxon have invasive races, varieties, sub-taxa or congeners?                                                                                                   | Yes      | Although the invasiveness of <i>S. abaster</i> was doubted by MacIsaac et al. (2015), the species is considered likely to establish in the Great Lakes, and <i>S. abaster</i> is expected to expand its range and successfully take over new areas because of its ability to osmoregulate, which allows it to quickly adapt to salinity changes (Snyder et al. 2015). In a new environment, the pipefish may negatively affect the native ecosystem by feeding on zooplanktonic communities, mainly copepods, but it can also affect native fish species by predating their larvae (Didenko et al. | Very high  |
| 2. Climate, distribution and introduction risk |      |                                                                                                                                                                         |          |                                                                                                                                                                                                                                                                                                                                                                                                                                                                                                                                                                                                    |            |
| 4                                              | 2.01 | How similar are the climatic conditions of the Risk Assessment (RA) area and the taxon's native range?                                                                  | High     | <i>S. abaster</i> is naturally distributed in the western part of the SC region and has been translocated in the Caspian basin. ( World Map of the Köppen-Geiger climate classification)                                                                                                                                                                                                                                                                                                                                                                                                           | Very high  |
| 5                                              | 2.02 | What is the quality of the climate matching data?                                                                                                                       | High     | World Map of the Köppen-Geiger climate classification                                                                                                                                                                                                                                                                                                                                                                                                                                                                                                                                              | Very high  |
| 6                                              | 2.03 | Is the taxon already present outside of captivity in the RA area?                                                                                                       | Yes      | The black-striped pipefish is normally found in coastal waters of the Mediterranean, Black, and Azov seas. Recently this species found in the Tbilisi Reservoir, East Georgia (Kuljanishvili et al.                                                                                                                                                                                                                                                                                                                                                                                                | Very high  |
| 7                                              | 2.04 | How many potential vectors could the taxon use to enter in the RA area?                                                                                                 | >1       | This species is distributed in the region naturally and by humans.                                                                                                                                                                                                                                                                                                                                                                                                                                                                                                                                 | Very high  |
| 8                                              | 2.05 | Is the taxon currently found in close proximity to, and likely to enter into, the RA area in the near future (e.g. unintentional and intentional introductions)?        | Yes      | This species is naturally distributed in the SC region and surrounding countries (Kuljanishvili et al. 2020).                                                                                                                                                                                                                                                                                                                                                                                                                                                                                      | Very high  |
| 3. Invasive elsewhere                          |      |                                                                                                                                                                         |          |                                                                                                                                                                                                                                                                                                                                                                                                                                                                                                                                                                                                    |            |
| 9                                              | 3.01 | Has the taxon become naturalised (established viable populations) outside its native range?                                                                             | Yes      | We confirmed the existence and successful establishment of black-striped pipefish in the Tbilisi Reservoir. <i>S. abaster</i> has lived and been reproducing in the reservoir for at least 4 decades (Kuljanishvili et al. 2021).                                                                                                                                                                                                                                                                                                                                                                  | Very high  |
| 10                                             | 3.02 | In the taxon's introduced range, are there known adverse impacts to wild stocks or commercial taxa?                                                                     | Yes      | In a new environment, the pipefish may negatively affect the native ecosystem by feeding on zooplanktonic communities, mainly copepods, but it can also affect native fish species by predating their larvae (Didenko et al. 2018; Kuljanishvili et al.                                                                                                                                                                                                                                                                                                                                            | High       |
| 11                                             | 3.03 | In the taxon's introduced range, are there known adverse impacts to aquaculture?                                                                                        | No       | Data deficient                                                                                                                                                                                                                                                                                                                                                                                                                                                                                                                                                                                     | Medium     |
| 12                                             | 3.04 | In the taxon's introduced range, are there known adverse impacts to ecosystem                                                                                           | No       | Data deficient                                                                                                                                                                                                                                                                                                                                                                                                                                                                                                                                                                                     | Low        |
| 13                                             | 3.05 | In the taxon's introduced range, are there known adverse socio-economic impacts?                                                                                        | No       | Data deficient                                                                                                                                                                                                                                                                                                                                                                                                                                                                                                                                                                                     | Low        |
| B. Biology/Ecology                             |      |                                                                                                                                                                         |          |                                                                                                                                                                                                                                                                                                                                                                                                                                                                                                                                                                                                    |            |
| 4. Undesirable (or persistence) traits         |      |                                                                                                                                                                         |          |                                                                                                                                                                                                                                                                                                                                                                                                                                                                                                                                                                                                    |            |
| 14                                             | 4.01 | Is it likely that the taxon will be poisonous or pose other risks to human health?                                                                                      | No       | This species does not pose a threat to humans                                                                                                                                                                                                                                                                                                                                                                                                                                                                                                                                                      | Medium     |
| 15                                             | 4.02 | Is it likely that the taxon will smother one or more native taxa (that are not threatened or protected)?                                                                | Yes      | In a new environment, the pipefish may negatively affect the native ecosystem by feeding on zooplanktonic communities, mainly copepods, but it can also affect native fish species by predating their larvae (Didenko et al. 2018).                                                                                                                                                                                                                                                                                                                                                                | High       |
| 16                                             | 4.03 | Are there any threatened or protected taxa that the non-native taxon would parasitise in the RA area?                                                                   | Yes      | In a new environment, the pipefish may negatively affect the native ecosystem by feeding on zooplanktonic communities, mainly copepods, but it can also affect native fish species by predating their larvae (Didenko et al. 2018).                                                                                                                                                                                                                                                                                                                                                                | High       |
| 17                                             | 4.04 | Is the taxon adaptable in terms of climatic and other environmental conditions, thus enhancing its potential persistence if it has invaded or could invade the RA area? | Yes      | This species is naturally distributed in the SC region (Ninua et al. 2013; Kuljanishvili et al. 2020).                                                                                                                                                                                                                                                                                                                                                                                                                                                                                             | High       |
| 18                                             | 4.05 | Is the taxon likely to disrupt food-web structure/function in aquatic ecosystems if it has invaded or is likely to invade the RA area?                                  | Yes      | In a new environment, the pipefish may negatively affect the native ecosystem by feeding on zooplanktonic communities, mainly copepods, but it can also affect native fish species by predating their larvae (Didenko et al. 2018).                                                                                                                                                                                                                                                                                                                                                                | High       |
| 19                                             | 4.06 | Is the taxon likely to exert adverse impacts on ecosystem services in the RA area?                                                                                      | Yes      | No research has been conducted in this direction.                                                                                                                                                                                                                                                                                                                                                                                                                                                                                                                                                  | Medium     |

|                                 |      |                                                                                                                                                                                           |                |                                                                                                                                                                                                                                                                                                           |           |
|---------------------------------|------|-------------------------------------------------------------------------------------------------------------------------------------------------------------------------------------------|----------------|-----------------------------------------------------------------------------------------------------------------------------------------------------------------------------------------------------------------------------------------------------------------------------------------------------------|-----------|
| 20                              | 4.07 | Is it likely that the taxon will host, and/or act as a vector for, recognised pests and infectious agents that are endemic in the RA                                                      | Not applicable | No research has been conducted in this direction.                                                                                                                                                                                                                                                         | Low       |
| 21                              | 4.08 | Is it likely that the taxon will host, and/or act as a vector for, recognised pests and infectious agents that are absent from (novel to) the RA area?                                    | Not applicable | No research has been conducted in this direction.                                                                                                                                                                                                                                                         | Low       |
| 22                              | 4.09 | Is it likely that the taxon will achieve a body size that will make it more likely to be released from captivity?                                                                         | No             | S. abaster is small sized fish and does not have commercial value                                                                                                                                                                                                                                         | High      |
| 23                              | 4.10 | Is the taxon capable of sustaining itself in a range of water velocity conditions (e.g. versatile in habitat use)?                                                                        | No             | The black-striped pipefish is found in coastal waters and in the lower reaches of rivers in the Caspian, Black and Mediterranean Sea basins, living in relatively shallow waters around seaweed and sea grass, and is also found in brackish waters                                                       | Very high |
| 24                              | 4.11 | Is it likely that the taxon's mode of existence (e.g. excretion of by-products) or behaviours (e.g. feeding) will reduce habitat quality for native taxa?                                 | Yes            | No research has been conducted in this direction.                                                                                                                                                                                                                                                         | Medium    |
| 25                              | 4.12 | Is the taxon likely to maintain a viable population even when present in low densities (or persisting in adverse conditions by way of a dormant form)?                                    | Not applicable | Data deficient                                                                                                                                                                                                                                                                                            | Low       |
| <b>5. Resource exploitation</b> |      |                                                                                                                                                                                           |                |                                                                                                                                                                                                                                                                                                           |           |
| 26                              | 5.01 | Is the taxon likely to consume threatened or protected native taxa in the RA area?                                                                                                        | No             | No such fact has been described                                                                                                                                                                                                                                                                           | Low       |
| 27                              | 5.02 | Is the taxon likely to sequester food resources (including nutrients) to the detriment of native taxa in the RA area?                                                                     | Yes            | In a new environment, the pipefish may negatively affect the native ecosystem by feeding on zooplanktonic communities, mainly copepods, but it can also affect native fish species by predating their larvae (Didenko et al. 2018).                                                                       | High      |
| <b>6. Reproduction</b>          |      |                                                                                                                                                                                           |                |                                                                                                                                                                                                                                                                                                           |           |
| 28                              | 6.01 | Is the taxon likely to exhibit parental care and/or to reduce age-at-maturity in response to environmental conditions?                                                                    | Not applicable | Data deficient                                                                                                                                                                                                                                                                                            | Low       |
| 29                              | 6.02 | Is the taxon likely to produce viable gametes or propagules (in the RA area)?                                                                                                             | Yes            | This species is naturally reproduces in the SC region.                                                                                                                                                                                                                                                    | Very high |
| 30                              | 6.03 | Is the taxon likely to hybridise naturally with native taxa?                                                                                                                              | No             | Such a fact is not described.                                                                                                                                                                                                                                                                             | Low       |
| 31                              | 6.04 | Is the taxon likely to be hermaphroditic or to display asexual reproduction?                                                                                                              | No             | Such a fact is not known.                                                                                                                                                                                                                                                                                 | Low       |
| 32                              | 6.05 | Is the taxon dependent on the presence of another taxon (or specific habitat features) to complete its life cycle?                                                                        | No             | Such a fact is not known.                                                                                                                                                                                                                                                                                 | Medium    |
| 33                              | 6.06 | Is the taxon known (or likely) to produce a large number of propagules or offspring within a short time span (e.g. < 1 year)?                                                             | No             | Females lay 10-60 eggs into a brood pouch on ventral surface of tail of males.                                                                                                                                                                                                                            | Very high |
| 34                              | 6.07 | How many time units (days, months, years) does the taxon require to reach the age-at-first-reproduction?                                                                                  | 1              | Own judgement                                                                                                                                                                                                                                                                                             | Medium    |
| <b>7. Dispersal mechanisms</b>  |      |                                                                                                                                                                                           |                |                                                                                                                                                                                                                                                                                                           |           |
| 35                              | 7.01 | How many potential internal vectors/pathways could the taxon use to disperse within the RA area (with suitable protected areas (e.g. MCZ, MPA, SSSI)?                                     | > 1            | This species disperses within the region naturally and by other organisms (birds, etc). Also unintentional translocation has been noted in case of the Tbilisi Reservoir (Kuljanishvili et al. 2021).                                                                                                     | High      |
| 36                              | 7.02 | Will any of these vectors/pathways bring the taxon in close proximity to one or more protected areas (e.g. MCZ, MPA, SSSI)?                                                               | Yes            | The probability of this is quite high                                                                                                                                                                                                                                                                     | High      |
| 37                              | 7.03 | Does the taxon have a means of actively attaching itself to hard substrata (e.g. ship hulls, pilings, buoys) such that it enhances the likelihood of dispersal?                           | No             | This species does not have such means                                                                                                                                                                                                                                                                     | High      |
| 38                              | 7.04 | Is natural dispersal of the taxon likely to occur as eggs (for animals) or as propagules (for plants: seeds, spores) in the RA area?                                                      | Yes            | This species is naturally spreads in the SC region.                                                                                                                                                                                                                                                       | Very high |
| 39                              | 7.05 | Is natural dispersal of the taxon likely to occur as larvae/juveniles (for animals) or as fragments/seedlings (for plants) in the RA area?                                                | Yes            | This species is naturally spreads in the SC region.                                                                                                                                                                                                                                                       | Very high |
| 40                              | 7.06 | Are older life stages of the taxon likely to migrate in the RA area for reproduction?                                                                                                     | Yes            | This species is naturally reproduces in the SC region.                                                                                                                                                                                                                                                    | Very high |
| 41                              | 7.07 | Are propagules or eggs of the taxon likely to be dispersed in the RA area by other animals?                                                                                               | Yes            | The probability of this is quite high.                                                                                                                                                                                                                                                                    | High      |
| 42                              | 7.08 | Is dispersal of the taxon along any of the vectors/pathways mentioned in the previous seven questions (35–41; i.e. both unintentional or intentional) likely to be                        | Yes            | Own judgement                                                                                                                                                                                                                                                                                             | Medium    |
| 43                              | 7.09 | Is dispersal of the taxon density dependent?                                                                                                                                              | Yes            | Own judgement                                                                                                                                                                                                                                                                                             | Low       |
| <b>8. Tolerance attributes</b>  |      |                                                                                                                                                                                           |                |                                                                                                                                                                                                                                                                                                           |           |
| 44                              | 8.01 | Is the taxon able to withstand being out of water for extended periods (e.g. minimum of one or more hours) at some stage of its life cycle?                                               | No             | No such fact has been described                                                                                                                                                                                                                                                                           | High      |
| 45                              | 8.02 | Is the taxon tolerant of a wide range of water quality conditions relevant to that taxon? [In the Justification field, indicate the relevant water quality variable(s) being considered.] | Yes            | Black-striped pipefish is an euryhaline species of fish that can tolerate significant fluctuations in salinity, live in both fresh and salty water. Pipefish live among vegetation in shallow waters of the Mediterranean, the Black, Azov and Caspian seas, enter rivers and lakes associated with them. | High      |

|    |      |                                                                                                                   |     |                                                                                                                                                                                                                                                                                                |           |
|----|------|-------------------------------------------------------------------------------------------------------------------|-----|------------------------------------------------------------------------------------------------------------------------------------------------------------------------------------------------------------------------------------------------------------------------------------------------|-----------|
| 46 | 8.03 | Can the taxon be controlled or eradicated in the wild with chemical, biological, or other agents/means?           | Yes | Of the four chemical piscicides registered for use in the United States, antimycin A and rotenone are considered general piscicides, but no studies have been found about their effects on <i>S. abaster</i> (GLMRIS 2012)                                                                     | High      |
| 47 | 8.04 | Is the taxon likely to tolerate or benefit from environmental/human disturbance?                                  | Yes | Introductions of <i>S. abaster</i> into new areas were mostly due to self-spreading (Kuderskii 1971) but also to human-mediated activities such as river regulation, fish stocking (Slynko et al. 2011, Didenko et al. 2018, Marenkov 2018), and ballast water transport (Lavoie et al. 1999). | Very high |
| 48 | 8.05 | Is the taxon able to tolerate salinity levels that are higher or lower than those found in its usual environment? | Yes | <i>S. abaster</i> living in relatively shallow waters around seaweed and sea grass, and is also found in brackish waters.                                                                                                                                                                      | Very high |
| 49 | 8.06 | Are there effective natural enemies (predators) of the taxon present in the RA area?                              | Yes | There are many predator species in the SC region which can control the <i>S. abaster</i> population: Sander lucioperca, Perca fluviatilis, Salmo spp, Squalius spp, etc.                                                                                                                       | Very high |

#### C. Climate change

##### 9. Climate change

|    |      |                                                                                                                                                              |           |               |        |
|----|------|--------------------------------------------------------------------------------------------------------------------------------------------------------------|-----------|---------------|--------|
| 50 | 9.01 | Under the predicted future climatic conditions, are the risks of entry into the RA area posed by the taxon likely to increase, decrease or not change?       | Increase  | Own judgement | Medium |
| 51 | 9.02 | Under the predicted future climatic conditions, are the risks of establishment posed by the taxon likely to increase, decrease or not change?                | Increase  | Own judgement | Medium |
| 52 | 9.03 | Under the predicted future climatic conditions, are the risks of dispersal within the RA area posed by the taxon likely to increase, decrease or not change? | Increase  | Own judgement | Medium |
| 53 | 9.04 | Under the predicted future climatic conditions, what is the likely magnitude of future potential impacts on biodiversity and/or ecological integrity/status? | Higher    | Own judgement | Medium |
| 54 | 9.05 | Under the predicted future climatic conditions, what is the likely magnitude of future potential impacts on ecosystem structure and/or function?             | Higher    | Own judgement | Medium |
| 55 | 9.06 | Under the predicted future climatic conditions, what is the likely magnitude of future potential impacts on ecosystem services/socio-economic factors?       | No change | Own judgement | Medium |

| Statistics                                     |             |
|------------------------------------------------|-------------|
| Scores                                         |             |
| <b>BRA</b>                                     | <b>27.0</b> |
| <b>BRA Outcome</b>                             | <b>-</b>    |
| <b>BRA+CCA</b>                                 | <b>37.0</b> |
| <b>BRA+CCA Outcome</b>                         | <b>-</b>    |
| Score partition                                |             |
| <b>A. Biogeography/Historical</b>              | <b>8.0</b>  |
| 1. Domestication/Cultivation                   | 0.0         |
| 2. Climate, distribution and introduction risk | 2.0         |
| 3. Invasive elsewhere                          | 6.0         |
| <b>B. Biology/Ecology</b>                      | <b>19.0</b> |
| 4. Undesirable (or persistence) traits         | 6.0         |
| 5. Resource exploitation                       | 2.0         |
| 6. Reproduction                                | 1.0         |
| 7. Dispersal mechanisms                        | 7.0         |
| 8. Tolerance attributes                        | 3.0         |
| <b>C. Climate change</b>                       | <b>10.0</b> |
| 9. Climate change                              | 10.0        |
| Answered Questions                             |             |
| <b>Total</b>                                   | <b>55</b>   |
| <b>A. Biogeography/Historical</b>              | <b>13</b>   |
| 1. Domestication/Cultivation                   | 3           |
| 2. Climate, distribution and introduction risk | 5           |
| 3. Invasive elsewhere                          | 5           |
| <b>B. Biology/Ecology</b>                      | <b>36</b>   |
| 4. Undesirable (or persistence) traits         | 12          |
| 5. Resource exploitation                       | 2           |
| 6. Reproduction                                | 7           |
| 7. Dispersal mechanisms                        | 9           |
| 8. Tolerance attributes                        | 6           |
| <b>C. Climate change</b>                       | <b>6</b>    |
| 9. Climate change                              | 6           |
| Sectors affected                               |             |
| <b>Commercial</b>                              | <b>7</b>    |
| <b>Environmental</b>                           | <b>8</b>    |
| <b>Species or population nuisance traits</b>   | <b>27</b>   |

| Thresholds     |             |
|----------------|-------------|
| <b>BRA</b>     | <b>-</b>    |
| <b>BRA+CCA</b> | <b>-</b>    |
| Confidence     |             |
| <b>BRA+CCA</b> | <b>0.66</b> |



|  |     |      |
|--|-----|------|
|  | BRA | 0.68 |
|  | CCA | 0.50 |

| Date and Time       |  |
|---------------------|--|
| 13/05/2022 18:54:13 |  |

## AS-ISK v2

| Taxon and Assessor details         |                                                                                                                               |
|------------------------------------|-------------------------------------------------------------------------------------------------------------------------------|
| Category                           | Fishes and Lampreys (freshwater)                                                                                              |
| Taxon name                         | <i>Syngnathus abaster</i>                                                                                                     |
| Common name                        | black-striped pipefish                                                                                                        |
| Assessor                           | Tatia Kuljanishvili                                                                                                           |
| Risk screening context             |                                                                                                                               |
| Reason and socio-economic benefits | Has been observed in a freshwater reservoir of the middle Kura River basin.                                                   |
| Risk assessment area               | South Caucasus                                                                                                                |
| Taxonomy                           | Syngnathiformes Syngnathidae Syngnathinae                                                                                     |
| Native range                       | Mediterranean, Black and Azov seas.                                                                                           |
| Introduced range                   | The Kura River Basin                                                                                                          |
| URL                                | <a href="https://www.fishbase.de/summary/Syngnathus-abaster.html">https://www.fishbase.de/summary/Syngnathus-abaster.html</a> |

|                                                |      | Response                                                                                                                                                                | Justification (references and/or other information) | Confidence                                                                                                                                                                                                                                                                                                                                                                                                                                                                                                                        |           |
|------------------------------------------------|------|-------------------------------------------------------------------------------------------------------------------------------------------------------------------------|-----------------------------------------------------|-----------------------------------------------------------------------------------------------------------------------------------------------------------------------------------------------------------------------------------------------------------------------------------------------------------------------------------------------------------------------------------------------------------------------------------------------------------------------------------------------------------------------------------|-----------|
| A. Biogeography/Historical                     |      |                                                                                                                                                                         |                                                     |                                                                                                                                                                                                                                                                                                                                                                                                                                                                                                                                   |           |
| 1. Domestication/Cultivation                   |      |                                                                                                                                                                         |                                                     |                                                                                                                                                                                                                                                                                                                                                                                                                                                                                                                                   |           |
| 1                                              | 1.01 | Has the taxon been the subject of domestication (or cultivation) for at least 20 generations?                                                                           | No                                                  | Has not been subject of domestication or human selection.                                                                                                                                                                                                                                                                                                                                                                                                                                                                         | High      |
| 2                                              | 1.02 | Is the taxon harvested in the wild and likely to be sold or used in its live form?                                                                                      | No                                                  | This species does not have trade importance.                                                                                                                                                                                                                                                                                                                                                                                                                                                                                      | High      |
| 3                                              | 1.03 | Does the taxon have invasive races, varieties, sub-taxa or congeners?                                                                                                   | No                                                  | No. However the taxon has been object of discussion if it is invasive itself or not, for example in freshwaters reservoirs of Ukraine, and Great Lakes.                                                                                                                                                                                                                                                                                                                                                                           | Medium    |
| 2. Climate, distribution and introduction risk |      |                                                                                                                                                                         |                                                     |                                                                                                                                                                                                                                                                                                                                                                                                                                                                                                                                   |           |
| 4                                              | 2.01 | How similar are the climatic conditions of the Risk Assessment (RA) area and the taxon's native range?                                                                  | High                                                | Yes it is somehow similar.                                                                                                                                                                                                                                                                                                                                                                                                                                                                                                        | High      |
| 5                                              | 2.02 | What is the quality of the climate matching data?                                                                                                                       | Medium                                              | Native area versus Kura River basin before Mingachevir reservoir shows climate similarity of 7-8 (out of 10) in east Georgia and west Azerbaijan however, whole Armenian territory is 4-5.                                                                                                                                                                                                                                                                                                                                        | High      |
| 6                                              | 2.03 | Is the taxon already present outside of captivity in the RA area?                                                                                                       | Yes                                                 | S. abaster is normally found in coastal waters of the Mediterranean, Black and Azov Seas; however, it has expanded its range upstream in the Danube, Dniester, Dnieper, Don and Volga rivers (Berg, 1949; Svetovidov, 1964; Kottelat & Freyhof, 2007). Recently, this species has also become an invader of freshwater reservoirs (Kiryukhina, 2013a; 2013b; Tereshchenko et al., 2016; Didenko et al., 2018; Marenkov, 2018).                                                                                                    | Very high |
| 7                                              | 2.04 | How many potential vectors could the taxon use to enter in the RA area?                                                                                                 | > 1                                                 | Self-spreading, fish stocking, ballast water transport, opening channels to interconnect river basins (for example Volga-Don                                                                                                                                                                                                                                                                                                                                                                                                      | Very high |
| 8                                              | 2.05 | Is the taxon currently found in close proximity to, and likely to enter into, the RA area in the near future (e.g. unintentional and intentional introductions)?        | Yes                                                 | We found S. abaster in the freshwater reservoir in the middle Kura River basin (Kuljanishvili et al 2020: in review).                                                                                                                                                                                                                                                                                                                                                                                                             | Very high |
| 3. Invasive elsewhere                          |      |                                                                                                                                                                         |                                                     |                                                                                                                                                                                                                                                                                                                                                                                                                                                                                                                                   |           |
| 9                                              | 3.01 | Has the taxon become naturalised (established viable populations) outside its native range?                                                                             | Yes                                                 | Yes. Abovementioned articles (Q6) demonstrated that this species is naturalised outside its native range. We found naturalised population as well (our own data).                                                                                                                                                                                                                                                                                                                                                                 | Very high |
| 10                                             | 3.02 | In the taxon's introduced range, are there known adverse impacts to wild stocks or commercial taxa?                                                                     | No                                                  | No information available                                                                                                                                                                                                                                                                                                                                                                                                                                                                                                          | Medium    |
| 11                                             | 3.03 | In the taxon's introduced range, are there known adverse impacts to aquaculture?                                                                                        | No                                                  | No information available                                                                                                                                                                                                                                                                                                                                                                                                                                                                                                          | Medium    |
| 12                                             | 3.04 | In the taxon's introduced range, are there known adverse impacts to ecosystem                                                                                           | No                                                  | Could be transmitting new diseases, otherwise does not have adverse impacts to ecosystem services.                                                                                                                                                                                                                                                                                                                                                                                                                                | Medium    |
| 13                                             | 3.05 | In the taxon's introduced range, are there known adverse socio-economic impacts?                                                                                        | No                                                  | No socio-economic impacts are known.                                                                                                                                                                                                                                                                                                                                                                                                                                                                                              | High      |
| B. Biology/Ecology                             |      |                                                                                                                                                                         |                                                     |                                                                                                                                                                                                                                                                                                                                                                                                                                                                                                                                   |           |
| 4. Undesirable (or persistence) traits         |      |                                                                                                                                                                         |                                                     |                                                                                                                                                                                                                                                                                                                                                                                                                                                                                                                                   |           |
| 14                                             | 4.01 | Is it likely that the taxon will be poisonous or pose other risks to human health?                                                                                      | No                                                  | S. abaster is harmless fish.                                                                                                                                                                                                                                                                                                                                                                                                                                                                                                      | Very high |
| 15                                             | 4.02 | Is it likely that the taxon will smother one or more native taxa (that are not threatened or protected)?                                                                | Yes                                                 | It may impact native ecosystem through shaping zooplanktonic communities by feeding its activity, which is mainly focused on copepods but can also affect native fish species (including threatened species) due to predation of their larvae (Didenko et                                                                                                                                                                                                                                                                         | Low       |
| 16                                             | 4.03 | Are there any threatened or protected taxa that the non-native taxon would parasitise in the RA area?                                                                   | No                                                  | No. S. abaster does not parasite.                                                                                                                                                                                                                                                                                                                                                                                                                                                                                                 | Very high |
| 17                                             | 4.04 | Is the taxon adaptable in terms of climatic and other environmental conditions, thus enhancing its potential persistence if it has invaded or could invade the RA area? | Yes                                                 | This species is of Ponto-Caspian origin (is distributed in coasts of Mediterranean Sea as well). modern Ponto-Caspian fauna includes the species, that lived in the Thethys Sea and the marine ancestry has contributed to their ability to easily adapt to different salinity fluctuations and has resulted in Ponto-Caspian species invasiveness. Ponto-Caspian aquatic species are well known invaders into North America due to their abilities to tolerate different environmental conditions and salinities (Reid & Orlova, | High      |
| 18                                             | 4.05 | Is the taxon likely to disrupt food-web structure/function in aquatic ecosystems if it has invaded or is likely to invade the RA area?                                  | No                                                  | It may impact native ecosystem through shaping zooplanktonic communities by feeding its activity, which is mainly focused on copepods but can also affect native fish species due to predation of their larvae (Didenko et al. 2018). However it is not documented if S. abaster can cause disruption of food-web structure in aquatic ecosystem.                                                                                                                                                                                 | Medium    |

|                                 |      |                                                                                                                                                                    |                |                                                                                                                                                                                                                                                                                                                                                                                                                                                                                                                                                               |           |
|---------------------------------|------|--------------------------------------------------------------------------------------------------------------------------------------------------------------------|----------------|---------------------------------------------------------------------------------------------------------------------------------------------------------------------------------------------------------------------------------------------------------------------------------------------------------------------------------------------------------------------------------------------------------------------------------------------------------------------------------------------------------------------------------------------------------------|-----------|
| 19                              | 4.06 | Is the taxon likely to exert adverse impacts on ecosystem services in the RA area?                                                                                 | No             | No.                                                                                                                                                                                                                                                                                                                                                                                                                                                                                                                                                           | High      |
| 20                              | 4.07 | Is it likely that the taxon will host, and/or act as a vector for, recognised pests and infectious agents that are endemic in the RA area?                         | Not applicable | Nothing is known about this.                                                                                                                                                                                                                                                                                                                                                                                                                                                                                                                                  | Low       |
| 21                              | 4.08 | Is it likely that the taxon will host, and/or act as a vector for, recognised pests and infectious agents that are absent from (novel to) the RA area?             | Yes            | Can be. However, no research has been conducted.                                                                                                                                                                                                                                                                                                                                                                                                                                                                                                              | Low       |
| 22                              | 4.09 | Is it likely that the taxon will achieve a body size that will make it more likely to be released from captivity?                                                  | No             | This species are very small body sized, in terms of their form, which is like a needle or a tube. It can not reach such sizes that could cause them to be released from captivity.                                                                                                                                                                                                                                                                                                                                                                            | Very high |
| 23                              | 4.10 | Is the taxon capable of sustaining itself in a range of water velocity conditions (e.g. versatile in habitat use)?                                                 | Yes            | This species native range is coastal and brackish waters of the Mediterranean, Black and Azov Seas, and they are invading freshwater (standing waters) reservoirs in Ukraine and Georgia, which means that they can sustain different ranges of velocity                                                                                                                                                                                                                                                                                                      | High      |
| 24                              | 4.11 | Is it likely that the taxon's mode of existence (e.g. excretion of by-products) or behaviours (e.g. feeding) will reduce habitat quality for native taxa?          | No             | Less likely.                                                                                                                                                                                                                                                                                                                                                                                                                                                                                                                                                  | Medium    |
| 25                              | 4.12 | Is the taxon likely to maintain a viable population even when present in low densities (or persisting in adverse conditions by way of a dormant form)?             | Yes            | The perfect example would be the study that we conducted (Kuljanishvili et al 2020 in review). Few individuals of <i>S. abaster</i> were translocated from the Black Sea basin to Tbilisi freshwater reservoir, which locals call 'Tbilisi Sea'. Due to reservoirs 'marine' name, local hobbyists assumed that, if the pipefish can live in the Black Sea, why would not it live in 'Tbilisi Sea'. They transported few individuals of pipefish from the Black Sea into the reservoir, and 20 years after we found <i>S. abaster</i> naturalised in the area. | Very high |
| <b>5. Resource exploitation</b> |      |                                                                                                                                                                    |                |                                                                                                                                                                                                                                                                                                                                                                                                                                                                                                                                                               |           |
| 26                              | 5.01 | Is the taxon likely to consume threatened or protected native taxa in the RA area?                                                                                 | No             | Less likely.                                                                                                                                                                                                                                                                                                                                                                                                                                                                                                                                                  | High      |
| 27                              | 5.02 | Is the taxon likely to sequester food resources (including nutrients) to the detriment of native taxa in the RA area?                                              | No             | Less likely.                                                                                                                                                                                                                                                                                                                                                                                                                                                                                                                                                  | Medium    |
| <b>6. Reproduction</b>          |      |                                                                                                                                                                    |                |                                                                                                                                                                                                                                                                                                                                                                                                                                                                                                                                                               |           |
| 28                              | 6.01 | Is the taxon likely to exhibit parental care and/or to reduce age-at-maturity in response to environmental conditions?                                             | Yes            | They are characterised with 'Male pregnancy' which means taking care of the inseminated eggs unless the larvae develops to fry and then they hatch.                                                                                                                                                                                                                                                                                                                                                                                                           | Very high |
| 29                              | 6.02 | Is the taxon likely to produce viable gametes or propagules (in the RA area)?                                                                                      | Yes            | during our field works we have found a few juvenile individuals.                                                                                                                                                                                                                                                                                                                                                                                                                                                                                              | Very high |
| 30                              | 6.03 | Is the taxon likely to hybridise naturally with native taxa?                                                                                                       | No             | No information available                                                                                                                                                                                                                                                                                                                                                                                                                                                                                                                                      | High      |
| 31                              | 6.04 | Is the taxon likely to be hermaphroditic or to display asexual reproduction?                                                                                       | No             | No. Does not display asexual reproduction                                                                                                                                                                                                                                                                                                                                                                                                                                                                                                                     | Very high |
| 32                              | 6.05 | Is the taxon dependent on the presence of another taxon (or specific habitat features) to complete its life cycle?                                                 | No             | No. See: <a href="https://www.fishbase.de/summary/Syngnathus-abaster.html">https://www.fishbase.de/summary/Syngnathus-abaster.html</a>                                                                                                                                                                                                                                                                                                                                                                                                                        | Very high |
| 33                              | 6.06 | Is the taxon known (or likely) to produce a large number of propagules or offspring within a short time span (e.g. < 1 year)?                                      | No             | They only have very limited number of propagules, only around 40 eggs can be developed in their sacks, per spawning.                                                                                                                                                                                                                                                                                                                                                                                                                                          | Very high |
| 34                              | 6.07 | How many time units (days, months, years) does the taxon require to reach the age-at-first-reproduction?                                                           | 1              | Spawns at 1 year.                                                                                                                                                                                                                                                                                                                                                                                                                                                                                                                                             | Very high |
| <b>7. Dispersal mechanisms</b>  |      |                                                                                                                                                                    |                |                                                                                                                                                                                                                                                                                                                                                                                                                                                                                                                                                               |           |
| 35                              | 7.01 | How many potential internal vectors/pathways could the taxon use to disperse within the RA area (with suitable vectors/pathways)?                                  | >1             | Intentional release, natural dispersal.                                                                                                                                                                                                                                                                                                                                                                                                                                                                                                                       | High      |
| 36                              | 7.02 | Will any of these vectors/pathways bring the taxon in close proximity to one or more protected areas (e.g. MCZ, MPA, SSSI)?                                        | Yes            | Difficult to answer. Possibly, yes.                                                                                                                                                                                                                                                                                                                                                                                                                                                                                                                           | Low       |
| 37                              | 7.03 | Does the taxon have a means of actively attaching itself to hard substrata (e.g. ship hulls, pilings, buoys) such that it enhances the likelihood of dispersal?    | No             | No. Morphologically this species does not have a means of actively attaching itself to hard substrata                                                                                                                                                                                                                                                                                                                                                                                                                                                         | Very high |
| 38                              | 7.04 | Is natural dispersal of the taxon likely to occur as eggs (for animals) or as propagules (for plants: seeds, spores) in the RA area?                               | No             | No, they are born as young individuals. They can not be dispersed as eggs whatsoever.                                                                                                                                                                                                                                                                                                                                                                                                                                                                         | Very high |
| 39                              | 7.05 | Is natural dispersal of the taxon likely to occur as larvae/juveniles (for animals) or as fragments/seedlings (for plants) in the RA area?                         | No             | No. No documented evidence                                                                                                                                                                                                                                                                                                                                                                                                                                                                                                                                    | Very high |
| 40                              | 7.06 | Are older life stages of the taxon likely to migrate in the RA area for reproduction?                                                                              | Yes            | Migration is possible during winter. However, due to obstacles (dams), it is less likely.                                                                                                                                                                                                                                                                                                                                                                                                                                                                     | Low       |
| 41                              | 7.07 | Are propagules or eggs of the taxon likely to be dispersed in the RA area by other animals?                                                                        | No             | No. Can not be dispersed by other animals                                                                                                                                                                                                                                                                                                                                                                                                                                                                                                                     | Very high |
| 42                              | 7.08 | Is dispersal of the taxon along any of the vectors/pathways mentioned in the previous seven questions (35–41; i.e. both unintentional or intentional) likely to be | No             | No information available                                                                                                                                                                                                                                                                                                                                                                                                                                                                                                                                      | High      |
| 43                              | 7.09 | Is dispersal of the taxon density dependent?                                                                                                                       | No             | Not documented.                                                                                                                                                                                                                                                                                                                                                                                                                                                                                                                                               | Medium    |
| <b>8. Tolerance attributes</b>  |      |                                                                                                                                                                    |                |                                                                                                                                                                                                                                                                                                                                                                                                                                                                                                                                                               |           |
| 44                              | 8.01 | Is the taxon able to withstand being out of water for extended periods (e.g. minimum of one or more hours) at some stage of its life cycle?                        | No             | No information available                                                                                                                                                                                                                                                                                                                                                                                                                                                                                                                                      | Very high |

|                          |      |                                                                                                                                                                              |           |                                                                                                                                                                                                                                                                                                                                                                                                                                                                                                                 |        |
|--------------------------|------|------------------------------------------------------------------------------------------------------------------------------------------------------------------------------|-----------|-----------------------------------------------------------------------------------------------------------------------------------------------------------------------------------------------------------------------------------------------------------------------------------------------------------------------------------------------------------------------------------------------------------------------------------------------------------------------------------------------------------------|--------|
| 45                       | 8.02 | Is the taxon tolerant of a wide range of water quality conditions relevant to that taxon? [In the Justification field, indicate the relevant water quality variable(s) being | Yes       | S. abaster can tolerate a wide range of salinities: freshwater, brackish and marine water conditions (Dawson 1984; Kottelat and Freyhof 2007).                                                                                                                                                                                                                                                                                                                                                                  | High   |
| 46                       | 8.03 | Can the taxon be controlled or eradicated in the wild with chemical, biological, or other agents/means?                                                                      | Yes       | Possibly yes.                                                                                                                                                                                                                                                                                                                                                                                                                                                                                                   | Medium |
| 47                       | 8.04 | Is the taxon likely to tolerate or benefit from environmental/human disturbance?                                                                                             | No        | We found this species in Tbilisi Reservoir shorelines, with developed vegetation, where people do not visit.                                                                                                                                                                                                                                                                                                                                                                                                    | Medium |
| 48                       | 8.05 | Is the taxon able to tolerate salinity levels that are higher or lower than those found in its usual environment?                                                            | Yes       | S. abaster is a euryhaline species that can tolerate a wide range of salinities: freshwater, brackish and marine water conditions (Dawson 1984; Kottelat and Freyhof 2007).                                                                                                                                                                                                                                                                                                                                     | High   |
| 49                       | 8.06 | Are there effective natural enemies (predators) of the taxon present in the RA                                                                                               | No        | No effective natural enemies present in RA area                                                                                                                                                                                                                                                                                                                                                                                                                                                                 | High   |
| <b>C. Climate change</b> |      |                                                                                                                                                                              |           |                                                                                                                                                                                                                                                                                                                                                                                                                                                                                                                 |        |
| <b>9. Climate change</b> |      |                                                                                                                                                                              |           |                                                                                                                                                                                                                                                                                                                                                                                                                                                                                                                 |        |
| 50                       | 9.01 | Under the predicted future climatic conditions, are the risks of entry into the RA area posed by the taxon likely to increase, decrease or not change?                       | No change | It was hypotheses that climate change might alert the mechanisms of transportation and introduction of non-native species. Commercial and recreational activities will increase, that itself increases the propagule pressure levels of non-native species (Hellmann et al 2008). However, since, this species are not connected commercial or recreational fisheries, I would assume that in future, their spread will mostly be caused as self-spread, rather than altered mechanism of transportation caused | Medium |
| 51                       | 9.02 | Under the predicted future climatic conditions, are the risks of establishment posed by the taxon likely to increase, decrease or not change?                                | Decrease  | Warming temperatures can be intolerable for this species, which can lead to the decrease of their establishment.                                                                                                                                                                                                                                                                                                                                                                                                | Low    |
| 52                       | 9.03 | Under the predicted future climatic conditions, are the risks of dispersal within the RA area posed by the taxon likely to increase, decrease or not change?                 | No change | I would assume that in future, their spread will mostly be caused as self-spread, rather than altered mechanism of transportation caused by climate change.                                                                                                                                                                                                                                                                                                                                                     | Low    |
| 53                       | 9.04 | Under the predicted future climatic conditions, what is the likely magnitude of future potential impacts on biodiversity and/or ecological integrity/status?                 | No change | No change or even lower.                                                                                                                                                                                                                                                                                                                                                                                                                                                                                        | Medium |
| 54                       | 9.05 | Under the predicted future climatic conditions, what is the likely magnitude of future potential impacts on ecosystem structure and/or function?                             | Lower     | Possibly lower.                                                                                                                                                                                                                                                                                                                                                                                                                                                                                                 | Medium |
| 55                       | 9.06 | Under the predicted future climatic conditions, what is the likely magnitude of future potential impacts on ecosystem services/socio-economic factors?                       | No change | No change.                                                                                                                                                                                                                                                                                                                                                                                                                                                                                                      | Medium |

| Statistics                                     |             |
|------------------------------------------------|-------------|
| Scores                                         |             |
| <b>BRA</b>                                     | <b>9.0</b>  |
| <b>BRA Outcome</b>                             | -           |
| <b>BRA+CCA</b>                                 | <b>5.0</b>  |
| <b>BRA+CCA Outcome</b>                         | -           |
| Score partition                                |             |
| <b>A. Biogeography/Historical</b>              | <b>2.0</b>  |
| 1. Domestication/Cultivation                   | -2.0        |
| 2. Climate, distribution and introduction risk | 2.0         |
| 3. Invasive elsewhere                          | 2.0         |
| <b>B. Biology/Ecology</b>                      | <b>7.0</b>  |
| 4. Undesirable (or persistence) traits         | 5.0         |
| 5. Resource exploitation                       | 0.0         |
| 6. Reproduction                                | 2.0         |
| 7. Dispersal mechanisms                        | -1.0        |
| 8. Tolerance attributes                        | 1.0         |
| <b>C. Climate change</b>                       | <b>-4.0</b> |
| 9. Climate change                              | -4.0        |
| Answered Questions                             |             |
| <b>Total</b>                                   | <b>55</b>   |
| <b>A. Biogeography/Historical</b>              | <b>13</b>   |
| 1. Domestication/Cultivation                   | 3           |
| 2. Climate, distribution and introduction risk | 5           |
| 3. Invasive elsewhere                          | 5           |
| <b>B. Biology/Ecology</b>                      | <b>36</b>   |
| 4. Undesirable (or persistence) traits         | 12          |
| 5. Resource exploitation                       | 2           |
| 6. Reproduction                                | 7           |
| 7. Dispersal mechanisms                        | 9           |
| 8. Tolerance attributes                        | 6           |
| <b>C. Climate change</b>                       | <b>6</b>    |
| 9. Climate change                              | 6           |
| Sectors affected                               |             |
| <b>Commercial</b>                              | <b>2</b>    |
| <b>Environmental</b>                           | <b>-1</b>   |
| <b>Species or population nuisance traits</b>   | <b>8</b>    |
| Thresholds                                     |             |
| <b>BRA</b>                                     | <b>-</b>    |

|                   |                |             |
|-------------------|----------------|-------------|
|                   | <b>BRA+CCA</b> | <b>-</b>    |
| <b>Confidence</b> |                |             |
|                   | <b>BRA+CCA</b> | <b>0.71</b> |
|                   | <b>BRA</b>     | <b>0.74</b> |
|                   | <b>CCA</b>     | <b>0.42</b> |

|                            |  |
|----------------------------|--|
| <b>Date and Time</b>       |  |
| <b>22/05/2022 15:57:47</b> |  |
